# Supplementary material
Source: PubMed Central journal article supplement (PMC10872298)

## **Table of Contents**

|                                                       |               |
|-------------------------------------------------------|---------------|
| <b>General Information .....</b>                      | <b>S2</b>     |
| <b>Materials and Methods.....</b>                     | <b>S2</b>     |
| <b>Experimental Synthetic procedure.....</b>          | <b>S2-S64</b> |
| <b>IC50 determination for 15-PGDH inhibitors.....</b> | <b>S68</b>    |
| <b>Reference.....</b>                                 | <b>S68</b>    |
| <b>NMR Spectra.....</b>                               | <b>S69</b>    |

## General Information

All NMR experiments were recorded on Bruker Ascend-600 spectrometer, Varian Inova-400 spectrometer and Bruker Ascend-400 spectrometer. Data for  $^1\text{H}$  and  $^{13}\text{C}$ -NMR spectra are reported as follows: chemical shift ( $\delta$ , ppm), integration, multiplicity (s = singlet, d = doublet, t = triplet, q = quartet, dd = doublet of doublets, ddd = doublet of doublets of doublets, dt = doublet of triplets and m = multiplet), and coupling constant (Hz). ISCO flash chromatography was used for purifications. Mass spectra were acquired on an Agilent Technologies 1200 series LC/MS using indicated ionization methods. Optical rotation was measured on a Rudolph Research Analytical Autopol® IV Polarimeter at  $\lambda = 589$  nm, unless otherwise noted. Enantiomeric excess was measured on a Shimadzu Prominence HPLC with the column and solvent system indicated with each characterized compound.

## Materials and Methods

All commercially available reagents were used as received unless otherwise stated. Deuterated solvents were purchased from Cambridge Isotope Laboratories, Inc. and Sigma Aldrich. All reactions were conducted in oven- or flame-dried glassware under an inert atmosphere of nitrogen. Tetrahydrofuran (THF), diethyl ether ( $\text{Et}_2\text{O}$ ), dichloromethane (DCM) and toluene were purified by passing the previously degassed solvents through two activated alumina columns and were stored under inert argon atmosphere prior to use.

### I General procedure A

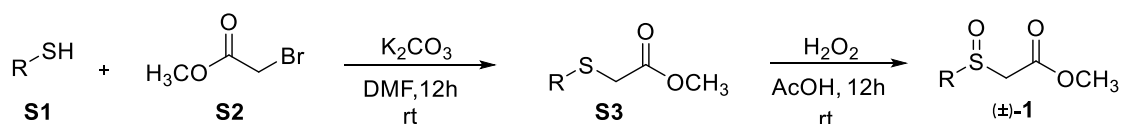

To a stirred mixture of thiol **S1** (9.07 mmol, 1.0 equiv) and  $\text{K}_2\text{CO}_3$  (2.50 g, 18.14 mmol, 2.0 equiv) in DMF (20 mL) was added methyl bromoacetate **S2** (1.65 g, 10.88 mmol, 1.2 equiv), and the resulting mixture was stirred at room temperature until the completion of reaction as indicated by LCMS analysis (typically within 12h). The reaction mixture was poured into ice-water (20 mL), and the mixture thus obtained was extracted with EtOAc ( $3 \times 40$  mL). The combined extracts were washed with brine ( $2 \times 40$  mL), dried over anhydrous  $\text{Na}_2\text{SO}_4$  and evaporated on a rotary evaporator to afford a residue, which was purified by ISCO flash chromatography.

30% hydrogen peroxide (0.9 mL, 8.00 mmol, 1.0 equiv) was added dropwise at 25 °C to a solution of mercapto acetate **S3** (8.00 mmol, 1.0 equiv) in AcOH (3.6 mL). The resulting mixture was stirred for 2-12h. When the reaction was over (as monitored by LCMS), the mixture was diluted with  $\text{H}_2\text{O}$  and extracted with EtOAc ( $3 \times 30$  mL). The combined organic layers were dried over anhydrous  $\text{Na}_2\text{SO}_4$  and evaporated on a rotary evaporator to afford a residue, which was purified by ISCO flash chromatography to give desired product ( $\pm$ )-**1**.

## II General procedure B

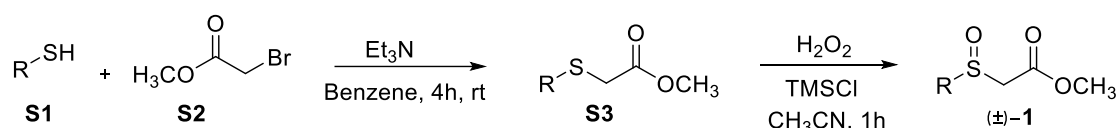

A mixture of thiol **S1** (9.07 mmol, 1.0 equiv), Et<sub>3</sub>N (1.3 mL, 9.07 mmol, 1.0 equiv) and methyl bromoacetate **S2** (1.38 g, 9.07 mmol, 1.0 equiv) in benzene (25 mL) was stirred at room temperature for 4h. The reaction mixture was diluted with H<sub>2</sub>O and extracted with ethyl acetate. The combined organic layers were dried with anhydrous Na<sub>2</sub>SO<sub>4</sub>, filtered and the solvent was removed under vacuum. Purification of the crude product by ISCO flash chromatography gave the title compound **S3**.

In a round-bottomed flask equipped with a stir bar, a solution of sulfide **S3** (8.00 mmol, 1.0 equiv) in CH<sub>3</sub>CN (25 mL) was prepared. Aqueous 30% hydrogen peroxide (1.3 mL, 12.0 mmol, 1.5 equiv) and TMSCl (864 mg, 8.00 mmol, 1.0 equiv) were added and the mixture was stirred at 25°C for 1h. The progress of the reaction was monitored by LCMS. After disappearance of the sulfide, the reaction mixture was quenched by adding H<sub>2</sub>O (10 mL), extracted with EtOAc (3 × 30 mL), and the combined organic layers were dried with anhydrous Na<sub>2</sub>SO<sub>4</sub>. Then the crude product (±)-**1** was purified by ISCO flash chromatography.

### Methyl 2-(cyclohexylsulfinyl)acetate (±)-**1a**

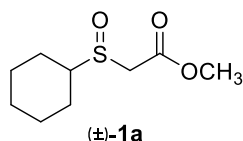

Synthesized by General procedure A.

### Methyl 2-(cyclohexylthio)acetate **S3a**

**Yield:** 92%. Purified by ISCO flash column chromatography (9:1 hexane:EtOAc v/v).

**<sup>1</sup>H NMR** (400 MHz, CDCl<sub>3</sub>) δ 3.54 (s, 3H), 3.07 (s, 2H), 2.67 - 2.58 (m, 1H), 1.84 - 1.77 (m, 2H), 1.62 - 1.55 (m, 2H), 1.46 - 1.40 (m, 1H), 1.22 - 1.01 (m, 5H).

**<sup>13</sup>C NMR** (101 MHz, CDCl<sub>3</sub>) δ 170.8, 51.9, 43.5, 32.7, 31.4, 25.6, 25.4.

**ESI MS.** C<sub>9</sub>H<sub>17</sub>O<sub>2</sub>S m/z [M+H]<sup>+</sup> calc. 189.1, found 189.1.

### Methyl 2-(cyclohexylsulfinyl)acetate (±)-**1a**

**Yield:** 88%. Purified by ISCO flash column chromatography (7:3 hexane:EtOAc v/v).

**<sup>1</sup>H NMR** (400 MHz, MeOD) δ 3.95 (d, *J* = 16.0 Hz, 1H), 3.79 (s, 3H), 3.73 (d, *J* = 16.0 Hz, 1H), 2.91 - 2.83 (m, 1H), 2.11 - 2.05 (m, 1H), 1.96 - 1.84 (m, 3H), 1.77 - 1.70 (m, 1H), 1.54 - 1.27 (m, 5H).

**<sup>13</sup>C NMR** (151 MHz, MeOD) δ 167.7, 59.9, 53.6, 53.2, 27.5, 26.5, 26.4, 26.1, 25.3.

**ESI MS.** C<sub>9</sub>H<sub>17</sub>O<sub>3</sub>S m/z [M+H]<sup>+</sup> calc. 205.1, found 205.1.

### Methyl 2-(hexylsulfinyl)acetate (±)-**1b**

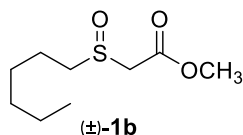

Synthesized by General procedure A.

**Methyl 2-(hexylthio)acetate S3b**

**Yield:** 90%. Purified by ISCO flash column chromatography (9:1 hexane:EtOAc v/v).

**<sup>1</sup>H NMR** (400 MHz, CDCl<sub>3</sub>)  $\delta$  3.71 (s, 3H), 3.19 (s, 2H), 2.63 - 2.55 (m, 2H), 1.60 - 1.53 (m, 2H), 1.31 - 1.21 (m, 6H), 0.86 (t,  $J$  = 8.0 Hz, 3H).

**<sup>13</sup>C NMR** (101 MHz, CDCl<sub>3</sub>)  $\delta$  171.1, 52.4, 33.5, 32.8, 31.4, 29.0, 28.5, 22.6, 14.1.

**ESI MS.** C<sub>9</sub>H<sub>19</sub>O<sub>2</sub>S m/z [M+H]<sup>+</sup> calc. 191.1, found 191.1.

**Methyl 2-(hexylsulfinyl)acetate (±)-1b**

**Yield:** 86%. Purified by ISCO flash column chromatography (7:3 hexane:EtOAc v/v).

**<sup>1</sup>H NMR** (400 MHz, CDCl<sub>3</sub>)  $\delta$  3.78 (s, 3H), 3.67 (d,  $J$  = 4.0 Hz, 2H), 2.93 - 2.72 (m, 2H), 1.82 - 1.71 (m, 2H), 1.51 - 1.41 (m, 2H), 1.34 - 1.29 (m, 4H), 0.88 (t,  $J$  = 8.0 Hz, 3H).

**<sup>13</sup>C NMR** (101 MHz, CDCl<sub>3</sub>)  $\delta$  165.7, 55.8, 53.1, 52.9, 31.4, 28.5, 22.5, 22.5, 14.1.

**ESI MS.** C<sub>9</sub>H<sub>19</sub>O<sub>3</sub>S m/z [M+H]<sup>+</sup> calc. 207.1, found 207.1.

**Methyl 2-(phenylsulfinyl)acetate (±)-1c**

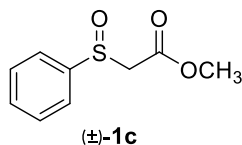

Synthesized by General procedure B.

**Methyl 2-(phenylthio)acetate S3c**

**Yield:** 91%. Purified by ISCO flash column chromatography (9:1 hexane:EtOAc v/v).

**<sup>1</sup>H NMR** (400 MHz, CDCl<sub>3</sub>)  $\delta$  7.44 - 7.41 (m, 2H), 7.34 - 7.28 (m, 2H), 7.27 - 7.23 (m, 1H), 3.73 (s, 3H), 3.67 (s, 2H).

**<sup>13</sup>C NMR** (101 MHz, CDCl<sub>3</sub>)  $\delta$  170.2, 135.0, 129.9, 129.1, 127.1, 52.6, 36.6.

**ESI MS.** C<sub>9</sub>H<sub>11</sub>O<sub>2</sub>S m/z [M+H]<sup>+</sup> calc. 183.0, found 183.0.

**Methyl 2-(phenylsulfinyl)acetate (±)-1c**

**Yield:** 87%. Purified by ISCO flash column chromatography (1:1 hexane:EtOAc v/v).

**<sup>1</sup>H NMR** (400 MHz, CDCl<sub>3</sub>)  $\delta$  7.69 - 7.64 (m, 2H), 7.56 - 7.50 (m, 3H), 3.83 (d,  $J$  = 16.0 Hz, 1H), 3.70 - 3.64 (m, 4H).

**<sup>13</sup>C NMR** (101 MHz, CDCl<sub>3</sub>)  $\delta$  165.3, 143.2, 131.9, 129.5, 124.2, 77.3, 61.7, 52.8.

**ESI MS.** C<sub>9</sub>H<sub>11</sub>O<sub>3</sub>S m/z [M+H]<sup>+</sup> calc. 199.0, found 199.0.

**Methyl 2-((4-methoxyphenyl)sulfinyl)acetate (±)-1d**

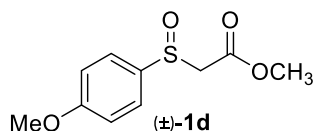

Synthesized by General procedure B.

**Methyl 2-((4-methoxyphenyl)thio)acetate S3d**

**Yield:** 90%. Purified by ISCO flash column chromatography (4:1 hexane:EtOAc v/v).

**<sup>1</sup>H NMR** (600 MHz, CDCl<sub>3</sub>) δ 7.45 - 7.31 (m, 2H), 6.89 - 6.74 (m, 2H), 3.76 (s, 3H), 3.66 (s, 3H), 3.50 (s, 2H).

**<sup>13</sup>C NMR** (151 MHz, CDCl<sub>3</sub>) δ 170.4, 159.7, 134.2, 124.8, 114.7, 55.3, 52.4, 38.4.

**ESI MS.** C<sub>10</sub>H<sub>13</sub>O<sub>3</sub>S m/z [M+H]<sup>+</sup> calc. 213.1, found 213.1.

### Methyl 2-((4-methoxyphenyl)sulfinyl)acetate (±)-1d

**Yield:** 87%. Purified by ISCO flash column chromatography (2:3 hexane:EtOAc v/v).

**<sup>1</sup>H NMR** (400 MHz, CDCl<sub>3</sub>) δ 7.58 - 7.53 (m, 2H), 7.00 - 6.95 (m, 2H), 3.83 - 3.78 (m, 4H), 3.72 - 3.48 (m, 4H).

**<sup>13</sup>C NMR** (101 MHz, CDCl<sub>3</sub>) δ 165.2, 162.6, 134.0, 126.2, 114.9, 61.6, 55.6, 52.6.

**ESI MS.** C<sub>10</sub>H<sub>13</sub>O<sub>4</sub>S m/z [M+H]<sup>+</sup> calc. 229.0, found 229.1.

### Methyl 2-(*p*-tolylsulfinyl)acetate (±)-1e

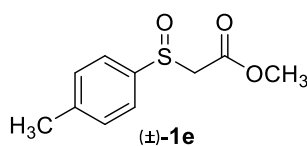

Synthesized by General procedure B.

### Methyl 2-(*p*-tolylthio)acetate S3e

**Yield:** 92%. Purified by ISCO flash column chromatography (9:1 hexane:EtOAc v/v).

**<sup>1</sup>H NMR** (400 MHz, CDCl<sub>3</sub>) δ 7.32 - 7.26 (m, 2H), 7.11 - 7.06 (m, 2H), 3.67 (s, 3H), 3.57 (s, 2H), 2.29 (s, 3H).

**<sup>13</sup>C NMR** (101 MHz, CDCl<sub>3</sub>) δ 170.1, 137.2, 131.2, 130.8, 129.9, 52.4, 37.1, 20.9.

**ESI MS.** C<sub>10</sub>H<sub>13</sub>O<sub>2</sub>S m/z [M+H]<sup>+</sup> calc. 197.1, found 197.1.

### Methyl 2-(*p*-tolylsulfinyl)acetate (±)-1e

**Yield:** 90%. Purified by ISCO flash column chromatography (3:2 hexane:EtOAc v/v).

**<sup>1</sup>H NMR** (400 MHz, CDCl<sub>3</sub>) δ 7.58 - 7.55 (m, 2H), 7.35 - 7.33 (m, 2H), 3.84 (d, *J* = 16.0 Hz, 1H), 3.70 (s, 3H), 3.64 (d, *J* = 16.0 Hz, 1H), 2.42 (s, 3H).

**<sup>13</sup>C NMR** (101 MHz, CDCl<sub>3</sub>) δ 165.4, 142.6, 139.9, 130.2, 124.3, 61.8, 52.9, 21.6.

**ESI MS.** C<sub>10</sub>H<sub>13</sub>O<sub>3</sub>S m/z [M+H]<sup>+</sup> calc. 213.1, found 213.1.

### Methyl 2-((4-(trifluoromethyl)phenyl)sulfinyl)acetate (±)-1f

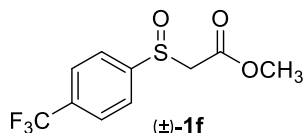

Synthesized by General procedure B.

### Methyl 2-((4-(trifluoromethyl)phenyl)thio)acetate S3f

**Yield:** 89%. Purified by ISCO flash column chromatography (9:1 hexane:EtOAc v/v).

**<sup>1</sup>H NMR** (400 MHz, CDCl<sub>3</sub>) δ 7.54 (d, *J* = 8.0 Hz, 2H), 7.44 (d, *J* = 8.9 Hz, 2H), 3.74 (s, 3H), 3.72 (s, 2H).

**<sup>13</sup>C NMR** (151 MHz, CDCl<sub>3</sub>) δ 169.7, 140.6, 128.6 (q), 128.1, 126.0 (q), 125.0 (q), 52.9, 35.2.

**ESI MS.** C<sub>10</sub>H<sub>10</sub>F<sub>3</sub>O<sub>2</sub>S m/z [M+H]<sup>+</sup> calc. 251.0, found 251.0.

**Methyl 2-((4-(trifluoromethyl)phenyl)sulfinyl)acetate(±)-1f**

**Yield:** 86%. Purified by ISCO flash column chromatography (2:1 hexane:EtOAc v/v).

**<sup>1</sup>H NMR** (400 MHz, CDCl<sub>3</sub>) δ 7.82 (s, 4H), 3.85 (d, *J* = 12.0 Hz, 1H), 3.75 - 3.71 (m, 4H).

**<sup>13</sup>C NMR** (151 MHz, CDCl<sub>3</sub>) δ 164.9, 147.6, 133.8 (q), 126.6 (q), 124.8, 122.5(q), 61.4, 53.1.

**ESI MS.** C<sub>10</sub>H<sub>10</sub>F<sub>3</sub>O<sub>3</sub>S m/z [M+H]<sup>+</sup> calc. 267.0, found 267.1.

**Methyl 2-((4-chlorophenyl)sulfinyl)acetate (±)-1g**

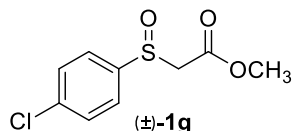

Synthesized by General procedure B.

**Methyl 2-((4-chlorophenyl)thio)acetate S3g**

**Yield:** 91%. Purified by ISCO flash column chromatography (9:1 hexane:EtOAc v/v).

**<sup>1</sup>H NMR** (400 MHz, CDCl<sub>3</sub>) δ 7.38 - 7.34 (m, 2H), 7.31 - 7.27 (m, 2H), 3.73 (s, 3H), 3.64 (s, 2H).

**<sup>13</sup>C NMR** (101 MHz, CDCl<sub>3</sub>) δ 170.0, 133.5, 133.3, 131.5, 129.3, 52.7, 36.7.

**ESI MS.** C<sub>9</sub>H<sub>10</sub>ClO<sub>2</sub>S m/z [M+H]<sup>+</sup> calc. 217.0, found 217.0.

**Methyl 2-((4-chlorophenyl)sulfinyl)acetate (±)-1g**

**Yield:** 88%. Purified by ISCO flash column chromatography (2:1 hexane:EtOAc v/v).

**<sup>1</sup>H NMR** (600 MHz, CDCl<sub>3</sub>) δ 7.63 - 7.61 (m, 2H), 7.52 - 7.50 (m, 2H), 3.83 (d, *J* = 12.0 Hz, 1H), 3.70 (s, 3H), 3.67 (d, *J* = 12.0 Hz, 1H).

**<sup>13</sup>C NMR** (151 MHz, CDCl<sub>3</sub>) δ 165.0, 141.6, 138.2, 129.8, 125.7, 61.5, 52.9.

**ESI MS.** C<sub>9</sub>H<sub>10</sub>ClO<sub>3</sub>S m/z [M+H]<sup>+</sup> calc. 233.0, found 233.0.

***tert*-Butyl 2-((2-methoxy-2-oxoethyl)sulfinyl)acetate (±)-1h**

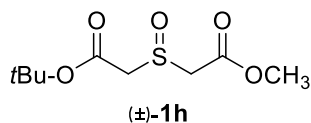

Synthesized by modified General procedure A.

***tert*-Butyl 2-((2-methoxy-2-oxoethyl)thio)acetate S3h**

**Yield:** 91%. Purified by ISCO flash column chromatography (4:1 hexane:EtOAc v/v).

**<sup>1</sup>H NMR** (400 MHz, CDCl<sub>3</sub>) δ 3.69 (s, 3H), 3.34 (s, 2H), 3.24 (s, 2H), 1.42 (s, 9H).

**<sup>13</sup>C NMR** (101 MHz, CDCl<sub>3</sub>) δ 170.3, 168.9, 81.9, 52.4, 34.8, 33.3, 27.9.

***tert*-butyl 2-((2-methoxy-2-oxoethyl)sulfinyl)acetate (±)-1h**

To a solution of above thiol (1.0 g, 4.54 mmol, 1.0 equiv) in dichloromethane (25 mL) at 0°C was added 3-chloroperoxybenzoic acid (1.1 g, 4.95 mmol, 1.1 equiv). The resulting mixture was allowed to warm to room temperature after addition and was stirred at ambient temperature for 3h. The reaction was quenched with saturated solution of sodium sulfite (20 mL) and water layer was extracted with CH<sub>2</sub>Cl<sub>2</sub> (3 × 30 mL). The combined organic layers were dried over

Na<sub>2</sub>SO<sub>4</sub>, filtered, and concentrated to give the crude product, which was purified using ISCO flash chromatography.

**Yield:** 76%. Purified by ISCO flash column chromatography (1:1 hexane:EtOAc v/v).

**<sup>1</sup>H NMR** (400 MHz, CDCl<sub>3</sub>) δ 4.02 (d, *J* = 16.0 Hz, 1H), 3.94 (d, *J* = 12.0 Hz, 1H), 3.84 - 3.68 (m, 5H), 1.49 (s, 9H).

**<sup>13</sup>C NMR** (101 MHz, CDCl<sub>3</sub>) δ 165.6, 164.1, 84.0, 56.7, 55.4, 53.1, 28.1.

**ESI MS.** C<sub>9</sub>H<sub>15</sub>O<sub>5</sub>S *m/z* [M-H]<sup>+</sup> calc. 235.1, found 235.0.

### III General procedure C

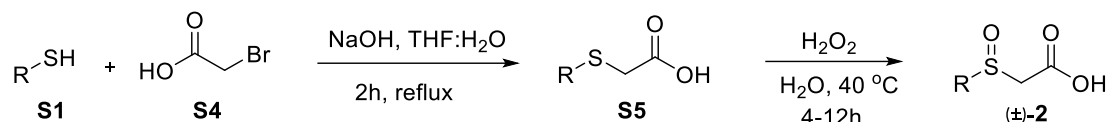

To a solution of thiol **S1** (10.58 mmol, 1.0 equiv) in THF (10 mL) was added NaOH (846 mg, 21.16 mmol, 2.0 equiv) in water (15.6 mL). Bromoacetic acid **S4** (1.46 g, 10.58 mmol, 1.0 equiv) was dissolved in THF (10 mL) and added to the reaction mixture. After stirring at reflux for 2h, the reaction mixture was cooled and acidified with 6N HCl. The water layer was extracted with ethyl acetate (3 × 30 mL). The combined organic layers were dried with anhydrous Na<sub>2</sub>SO<sub>4</sub>, filtered and the solvent was removed under reduced pressure. The crude **S5** was used directly in the next step without purification.

30% hydrogen peroxide (0.9 mL, 8.00 mmol, 1.0 equiv) was added to a solution of mercaptoacetic acid **S5** (8.00 mmol, 1.0 equiv) in distilled water (10 mL). The rapidly stirred mixture was heated at 40°C for 4-12h. When the reaction was over as monitored by LCMS, the mixture was allowed to cool to room temperature. Then the reaction mixture was diluted with water and extracted with EtOAc (3 × 30 mL). The combined organic layers were dried over anhydrous Na<sub>2</sub>SO<sub>4</sub>. The solvent was removed under reduced pressure and the crude (±)-**2** was used directly for the next step without any further purification.

### IV General procedure D

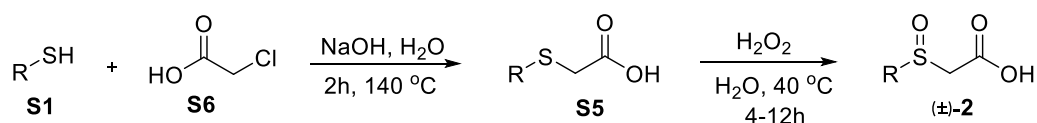

To a solution of thiol **S1** (10.58 mmol, 1.0 equiv) and chloroacetic acid **S6** (994 mg, 10.58 mmol, 1.0 equiv) in H<sub>2</sub>O (15 mL) was slowly added NaOH (846 mg, 21.16 mmol, 2.0 equiv). The resulting mixture was refluxed for 2h, then cooled to room temperature, and acidified with 6N HCl to pH 2. Then filtration gave thiol derivative **S5** which was used directly in the next step.

30% hydrogen peroxide (0.9 mL, 8.00 mmol, 1.0 equiv) was added to a solution of mercaptoacetic acid **S5** (8.00 mmol, 1.0 equiv) in H<sub>2</sub>O (10 mL). The rapidly stirred mixture was heated at 40°C for 4-12h. When the reaction was over, the mixture was allowed to cool to room temperature and water was removed under vacuum, washed with toluene (15 mL) and dried.

## 2-(Cyclohexylsulfinyl)acetic acid ( $\pm$ )-2a

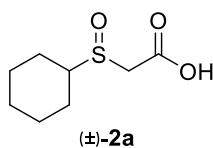

Synthesized by General procedure C.

## 2-(Cyclohexylthio)acetic acid S5a

Yield: 90%.

$^1\text{H NMR}$  (400 MHz, MeOD)  $\delta$  3.24 (s, 2H), 2.84 - 2.77 (m, 1H), 2.05 - 1.97 (m, 2H), 1.80 - 1.72 (m, 2H), 1.66 - 1.59 (m, 1H), 1.39 - 1.22 (m, 5H).

$^{13}\text{C NMR}$  (151 MHz, MeOD)  $\delta$  174.7, 44.9, 34.3, 32.8, 32.7, 27.0, 26.9.

ESI MS.  $\text{C}_8\text{H}_{15}\text{O}_2\text{S}$   $m/z$   $[\text{M}+\text{H}]^+$  calc. 175.1, found 175.1.

## 2-(Cyclohexylsulfinyl)acetic acid ( $\pm$ )-2a

Yield: 91%.

$^1\text{H NMR}$  (400 MHz,  $\text{CDCl}_3$ )  $\delta$  3.77 (d,  $J=12.0$  Hz, 1H), 3.61 (d,  $J=16.0$  Hz, 1H), 2.98 - 2.90 (m, 1H), 2.19 - 2.12 (m, 1H), 1.97 - 1.85 (m, 3H), 1.75 - 1.69 (m, 1H), 1.55 - 1.20 (m, 5H).

$^{13}\text{C NMR}$  (101 MHz,  $\text{CDCl}_3$ )  $\delta$  166.9, 58.5, 50.9, 26.4, 25.3 (d), 25.0, 24.6.

ESI MS.  $\text{C}_8\text{H}_{15}\text{O}_3\text{S}$   $m/z$   $[\text{M}+\text{H}]^+$  calc. 191.1, found 191.1.

## 2-(Hexylsulfinyl)acetic acid ( $\pm$ )-2b

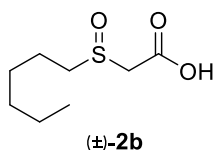

Synthesized by General procedure C.

## 2-(Hexylthio)acetic acid S5b

Yield: 89%.

$^1\text{H NMR}$  (400 MHz,  $\text{CDCl}_3$ )  $\delta$  3.24 (s, 2H), 2.67 - 2.63 (m, 2H), 1.64 - 1.54 (m, 2H), 1.42 - 1.22 (m, 6H), 0.88 (t,  $J=8.0$  Hz, 3H).

$^{13}\text{C NMR}$  (101 MHz,  $\text{CDCl}_3$ )  $\delta$  177.2, 33.6, 32.9, 31.5, 28.9, 28.5, 22.6, 14.1.

ESI MS.  $\text{C}_8\text{H}_{15}\text{O}_2\text{S}$   $m/z$   $[\text{M}-\text{H}]^+$  calc. 175.1, found 175.1.

## 2-(Hexylsulfinyl)acetic acid ( $\pm$ )-2b

Yield: 87%.

$^1\text{H NMR}$  (400 MHz, MeOD)  $\delta$  3.91 (d,  $J=16.0$  Hz, 1H), 3.72 (d,  $J=16.0$  Hz, 1H), 2.95 - 2.90 (m, 2H), 1.82 - 1.74 (m, 2H), 1.52 - 1.48 (m, 1H), 1.40 - 1.30 (m, 5H), 0.95 - 0.90 (m, 3H).

$^{13}\text{C NMR}$  (151 MHz, MeOD)  $\delta$  168.4, 56.6, 52.9, 39.8, 32.6, 29.4, 23.6, 23.5, 14.3.

ESI MS.  $\text{C}_8\text{H}_{17}\text{O}_3\text{S}$   $m/z$   $[\text{M}+\text{H}]^+$  calc. 193.1, found 193.1.

## 2-(Phenylsulfinyl)acetic acid ( $\pm$ )-2c

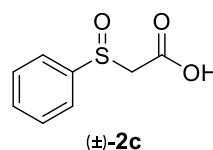



Synthesized by General procedure D.

### 2-(Phenylthio)acetic acid S5c

**Yield:** 92%.

**<sup>1</sup>H NMR** (400 MHz, CDCl<sub>3</sub>) δ 7.44 - 7.41 (m, 2H), 7.34 - 7.28 (m, 2H), 7.27 - 7.23 (m, 1H), 3.67 (s, 2H).

**<sup>13</sup>C NMR** (101 MHz, CDCl<sub>3</sub>) δ 176.4, 134.6, 130.2, 129.3, 127.4, 36.7.

**ESI MS.** C<sub>8</sub>H<sub>7</sub>O<sub>2</sub>S m/z [M-H]<sup>+</sup> calc. 167.0, found 167.0.

### 2-(Phenylsulfinyl)acetic acid (±)-2c

**Yield:** 90%.

**<sup>1</sup>H NMR** (400 MHz, MeOD) δ 7.78 - 7.72 (m, 2H), 7.63 - 7.57 (m, 3H), 3.93 (d, *J* = 16.0 Hz, 1H), 3.87 (d, *J* = 16.0 Hz, 1H).

**<sup>13</sup>C NMR** (151 MHz, MeOD) δ 167.9, 143.6, 133.0, 130.6, 125.5, 62.1.

**ESI MS.** C<sub>8</sub>H<sub>9</sub>O<sub>3</sub>S m/z [M+H]<sup>+</sup> calc. 185.0, found 185.0.

### 2-((4-Methoxyphenyl)sulfinyl)acetic acid (±)-2d

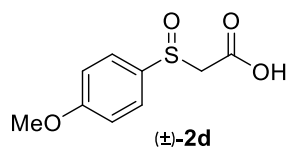

Synthesized by General procedure D.

### 2-((4-Methoxyphenyl)thio)acetic acid S5d

**Yield:** 93%.

**<sup>1</sup>H NMR** (600 MHz, CDCl<sub>3</sub>) δ 7.45 - 7.42 (m, 2H), 6.87 - 6.84 (m, 2H), 3.80 (s, 3H), 3.54 (s, 2H).

**<sup>13</sup>C NMR** (151 MHz, CDCl<sub>3</sub>) δ 176.1, 159.9, 134.4, 124.6, 114.9, 55.5, 38.7.

**ESI MS.** C<sub>9</sub>H<sub>11</sub>O<sub>3</sub>S m/z [M+H]<sup>+</sup> calc. 199.0, found 199.1.

### 2-((4-Methoxyphenyl)sulfinyl)acetic acid (±)-2d

**Yield:** 89%.

**<sup>1</sup>H NMR** (400 MHz, DMSO) δ 7.70 - 7.63 (m, 2H), 7.14 - 7.11 (m, 2H), 3.91 (d, *J* = 12.0 Hz, 1H), 3.82 - 3.78 (m, 4H).

**<sup>13</sup>C NMR** (101 MHz, DMSO) δ 166.8, 161.7, 134.6, 126.4, 114.8, 61.4, 55.5.

**ESI MS.** C<sub>9</sub>H<sub>11</sub>O<sub>4</sub>S m/z [M+H]<sup>+</sup> calc. 215.0, found 215.1.

### 2-(*p*-Tolylsulfinyl)acetic acid (±)-2e

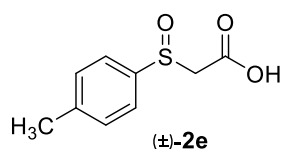

Synthesized by General procedure D.

### 2-(*p*-Tolylthio)acetic acid S5e

**Yield:** 89%.

**<sup>1</sup>H NMR** (600 MHz, CDCl<sub>3</sub>) δ 7.35 - 7.33 (m, 2H), 7.13 - 7.10 (m, 2H), 3.61 (s, 2H), 2.33 (s, 3H).

**<sup>13</sup>C NMR** (151 MHz, CDCl<sub>3</sub>) δ 175.8, 137.8, 131.1, 130.8, 130.1, 37.4, 21.2.

**ESI MS.** C<sub>9</sub>H<sub>11</sub>O<sub>2</sub>S m/z [M+H]<sup>+</sup> calc. 183.0, found 183.1.

### 2-(*p*-Tolylsulfinyl)acetic acid ( $\pm$ )-2e

**Yield:** 90%.

**$^1\text{H NMR}$**  (400 MHz,  $\text{CDCl}_3$ )  $\delta$  9.03 (s, 1H), 7.59 (d,  $J = 8.0$  Hz, 2H), 7.35 (d,  $J = 8.0$  Hz, 2H), 3.81 (d,  $J = 16.0$  Hz, 2H), 2.42 (s, 3H).

**$^{13}\text{C NMR}$**  (101 MHz,  $\text{CDCl}_3$ )  $\delta$  166.6, 143.1, 137.8, 130.6, 124.6, 59.1, 21.6.

**ESI MS.**  $\text{C}_9\text{H}_{11}\text{O}_3\text{S}$   $m/z$   $[\text{M}+\text{H}]^+$  calc. 199.0, found 199.1.

### 2-((4-(Trifluoromethyl)phenyl)sulfinyl)acetic acid ( $\pm$ )-2f

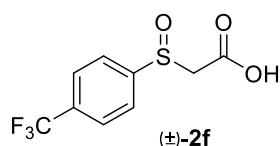

Synthesized by General procedure D.

### 2-((4-(Trifluoromethyl)phenyl)thio)acetic acid S5f

**Yield:** 88%.

**$^1\text{H NMR}$**  (600 MHz, DMSO)  $\delta$  12.95 (s, 1H), 7.66 - 7.63 (m, 2H), 7.50 - 7.48 (m, 2H), 3.96 (s, 2H).

**$^{13}\text{C NMR}$**  (151 MHz, DMSO)  $\delta$  170.2, 142.2, 126.7, 125.6 (q), 125.5 (q), 123.4, 33.8.

**ESI MS.**  $\text{C}_9\text{H}_8\text{F}_3\text{O}_2\text{S}$   $m/z$   $[\text{M}+\text{H}]^+$  calc. 237.0, found 237.0.

### 2-((4-(Trifluoromethyl)phenyl)sulfinyl)acetic acid ( $\pm$ )-2f

**Yield:** 85%.

**$^1\text{H NMR}$**  (400 MHz, MeOD)  $\delta$  7.93 (q,  $J = 8.4$  Hz, 4H), 4.04 (d,  $J = 16.0$  Hz, 1H), 3.90 (d,  $J = 16.0$  Hz, 1H).

**$^{13}\text{C NMR}$**  (151 MHz, MeOD)  $\delta$  167.8, 148.7, 134.5 (q), 127.5 (q), 126.4, 126.0 (q), 61.9.

**ESI MS.**  $\text{C}_9\text{H}_8\text{F}_3\text{O}_3\text{S}$   $m/z$   $[\text{M}+\text{H}]^+$  calc. 253.0, found 253.0.

### 2-((4-Chlorophenyl)sulfinyl)acetic acid ( $\pm$ )-2g

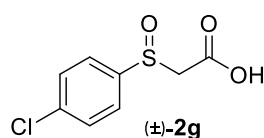

Synthesized by General procedure D.

### 2-((4-Chlorophenyl)thio)acetic acid S5g

**Yield:** 89%.

**$^1\text{H NMR}$**  (400 MHz, MeOD)  $\delta$  7.38 (d,  $J = 8.0$  Hz, 2H), 7.30 (d,  $J = 8.4$  Hz, 2H), 3.70 (s, 2H).

**$^{13}\text{C NMR}$**  (151 MHz,  $\text{CDCl}_3$ )  $\delta$  175.9, 133.7, 132.9, 131.7, 129.5, 36.9.

**ESI MS.**  $\text{C}_8\text{H}_8\text{ClO}_2\text{S}$   $m/z$   $[\text{M}+\text{H}]^+$  calc. 203.0, found 203.0.

### 2-((4-Chlorophenyl)sulfinyl)acetic acid ( $\pm$ )-2g

**Yield:** 87%.

**$^1\text{H NMR}$**  (600 MHz,  $\text{CDCl}_3$ )  $\delta$  7.64 (d,  $J = 6.0$  Hz, 2H), 7.56 (d,  $J = 12.0$  Hz, 2H), 3.88 (d,  $J = 18.0$  Hz, 1H), 3.70 (d,  $J = 12.0$  Hz, 1H).

**$^{13}\text{C NMR}$**  (151 MHz,  $\text{CDCl}_3$ )  $\delta$  165.6, 139.3, 138.9, 130.3, 125.8, 57.7.

**ESI MS.** C<sub>8</sub>H<sub>8</sub>ClO<sub>3</sub>S m/z [M+H]<sup>+</sup> calc. 219.0, found 219.1.

### 2-((2-(*tert*-Butoxy)-2-oxoethyl)sulfinyl)acetic acid (±)-2h

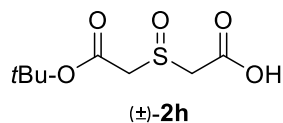

Ester derivative (±)-1h (700 mg, 2.96 mmol, 1.0 equiv) in ethanol (2.36 mL) was treated with 2N NaOH (1.9 mL, 3.85 mmol, 1.3 equiv) and stirred at room temperature for 3h. Using 2N HCl the reaction mixture was neutralized to a pH of 5.0. Ethanol was removed under reduced pressure and the aqueous residue was diluted with water and EtOAc. At 0°C the pH was brought to 3 with 10% citric acid. The aqueous layer was extracted with EtOAc (3 × 30 mL) and combined organic layers were dried over Na<sub>2</sub>SO<sub>4</sub>, filtered, and concentrated to give the crude product, which was used directly for the next reaction without any purification.

**ESI MS.** C<sub>8</sub>H<sub>13</sub>O<sub>5</sub>S m/z [M-H]<sup>+</sup> calc. 221.1, found 221.0.

### V General procedure E

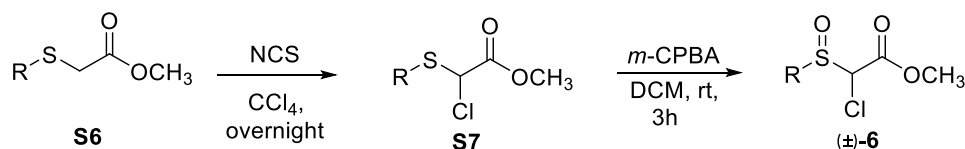

To an ice cold solution of thio derivative **S6** (10.00 mmol, 1.0 equiv) in CCl<sub>4</sub> (30 mL) was added of N-chlorosuccinimide (1.34 g, 10.00 mmol, 1.0 equiv), and the resulting solution was stirred overnight at rt. Evaporation of the solvent and purification by ISCO flash chromatography gave desired product **S7** which was used for next step.

To a solution of the product of the previous step **S7** (8.00 mmol, 1.0 equiv) in DCM (10 mL) at 0°C was added 3-chloroperoxybenzoic acid (2.37 g, 9.6 mmol, 1.2 equiv). The resulting mixture was allowed to warm to room temperature and stirred at room temperature for 3h (monitored by LCMS). The reaction was quenched with saturated sodium sulfite (20 mL) and the mixture was stirred at room temperature for 5 min. The layers were separated and the aqueous layer was extracted with CH<sub>2</sub>Cl<sub>2</sub> (3 × 30 mL). The combined organic layers were dried over Na<sub>2</sub>SO<sub>4</sub>, filtered, and concentrated to give the title compound (±)-6 which was purified by ISCO flash chromatography.

### Methyl 2-chloro-2-(cyclohexylsulfinyl)acetate (±)-6a

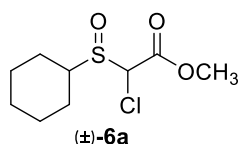

Synthesized by General procedure E.

**Yield:** 82%. Purified by ISCO flash column chromatography (3:2 hexane:EtOAc v/v).

**<sup>1</sup>H NMR** (400 MHz, CDCl<sub>3</sub>) δ 5.12 (s, 0.6H), 5.04 (s, 0.4H) 3.85 (s, 3H), 3.00 - 2.88 (m, 1H), 2.13 - 1.21 (m, 10H).

$^{13}\text{C}$  NMR (101 MHz,  $\text{CDCl}_3$ )  $\delta$  164.8, 164.5, 69.0, 65.6, 58.5, 56.9, 54.3, 54.1, 27.0, 26.3, 25.5, 25.2, 25.1, 25.0, 24.9, 23.1.

**ESI MS.**  $\text{C}_9\text{H}_{16}\text{ClO}_3\text{S}$   $m/z$   $[\text{M}+\text{H}]^+$  calc. 239.0, found 239.1.

### 2-Chloro-2-(hexylsulfinyl)acetic acid ( $\pm$ )-6b

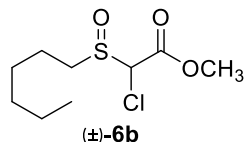

Synthesized by General procedure E.

**Yield:** 81%. Purified by ISCO flash column chromatography (3:1 hexane:EtOAc v/v).

$^1\text{H}$  NMR (600 MHz,  $\text{CDCl}_3$ )  $\delta$  5.16 (s, 0.6H), 5.09 (s, 0.4H), 3.91 (s, 1.2H), 3.90 (s, 1.8H), 2.96 - 2.78 (m, 2H), 1.85 - 1.72 (m, 2H), 1.52 - 1.42 (m, 2H), 1.34 - 1.29 (m, 4H), 0.90 - 0.87 (m, 3H).

$^{13}\text{C}$  NMR (151 MHz,  $\text{CDCl}_3$ )  $\delta$  164.4, 164.3, 69.3, 68.9, 54.3, 54.2, 50.2, 49.7, 31.4, 28.5, 22.8, 22.5, 22.2, 14.1.

**ESI MS.**  $\text{C}_9\text{H}_{18}\text{ClO}_3\text{S}$   $m/z$   $[\text{M}+\text{H}]^+$  calc. 241.1, found 241.1.

### Methyl 2-chloro-2-(phenylsulfinyl)acetate ( $\pm$ )-6c

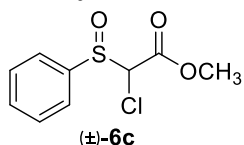

Synthesized by General procedure E.

**Yield:** 87%. Purified by ISCO flash column chromatography (1:1 hexane:EtOAc v/v).

$^1\text{H}$  NMR (400 MHz,  $\text{CDCl}_3$ )  $\delta$  7.71 - 7.68 (m, 2H), 7.63 - 7.53 (m, 3H), 5.09 (s, 0.5H), 4.99 (s, 0.5H), 3.82 (s, 1.5H), 3.74 (s, 1.5H).

$^{13}\text{C}$  NMR (101 MHz,  $\text{CDCl}_3$ )  $\delta$  163.8, 139.8, 133.0, 132.8, 129.4, 129.2, 125.8, 125.2, 74.7, 72.8, 53.9.

**ESI MS.**  $\text{C}_9\text{H}_{10}\text{ClO}_3\text{S}$   $m/z$   $[\text{M}+\text{H}]^+$  calc. 233.0, found 233.0.

### Methyl 2-chloro-2-((4-methoxyphenyl)sulfinyl)acetate ( $\pm$ )-6d

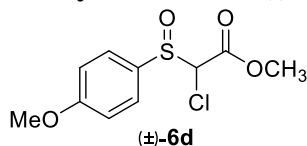

Synthesized by General procedure E.

**Yield:** 89%. Purified by ISCO flash column chromatography (2:3 hexane:EtOAc v/v).

$^1\text{H}$  NMR (600 MHz,  $\text{CDCl}_3$ )  $\delta$  7.65 - 7.61 (m, 2H), 7.04 - 7.02 (m, 2H), 5.08 (s, 0.5H), 4.97 (s, 0.5H), 3.86 (s, 3H), 3.81 (s, 1.5H), 3.72 (s, 1.5H).

$^{13}\text{C}$  NMR (151 MHz,  $\text{CDCl}_3$ )  $\delta$  164.2, 163.9, 163.5, 163.4, 130.1, 130.0, 127.8, 127.2, 114.9, 114.8, 74.4, 72.9, 55.7, 53.9.

**ESI MS.**  $\text{C}_{10}\text{H}_{12}\text{ClO}_4\text{S}$   $m/z$   $[\text{M}+\text{H}]^+$  calc. 263.0, found 263.0.

**Methyl 2-chloro-2-(p-tolylsulfinyl)acetate ( $\pm$ )-6e**

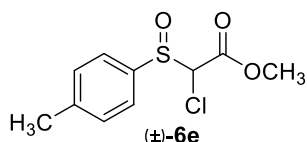

Synthesized by General procedure E.

**Yield:** 83%. Purified by ISCO flash column chromatography (2:3 hexane:EtOAc v/v).

**$^1\text{H NMR}$**  (600 MHz,  $\text{CDCl}_3$ )  $\delta$  7.59 - 7.55 (m, 2H), 7.35 - 7.33 (m, 2H), 5.09 (s, 0.5H), 4.98 (s, 0.5H), 3.80 (s, 1.5H), 3.72 (s, 1.5H), 2.42 (s, 3H).

**$^{13}\text{C NMR}$**  (101 MHz,  $\text{CDCl}_3$ )  $\delta$  163.9, 163.8, 143.7, 143.6, 136.2, 135.9, 129.9, 129.8, 125.7, 125.1, 74.5, 72.8, 53.8, 21.5.

**ESI MS.**  $\text{C}_{10}\text{H}_{12}\text{ClO}_3\text{S}$  m/z  $[\text{M}+\text{H}]^+$  calc. 247.0, found 247.1.

**Methyl 2-chloro-2-((4-(trifluoromethyl)phenyl)sulfinyl)acetate ( $\pm$ )-6f**

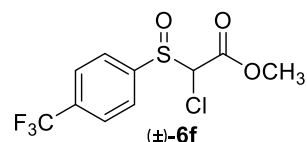

Synthesized by General procedure E.

**Yield:** 78%. Purified by ISCO flash column chromatography (2:3 hexane:EtOAc v/v).

**$^1\text{H NMR}$**  (400 MHz,  $\text{CDCl}_3$ )  $\delta$  7.85 - 7.79 (m, 4H), 5.18 (s, 0.5H), 5.09 (s, 0.5H), 3.82 (s, 1.5H), 3.77 (s, 1.5H).

**$^{13}\text{C NMR}$**  (101 MHz,  $\text{CDCl}_3$ )  $\delta$  163.6, 163.5, 143.9, 143.7, 134.6 (q), 130.2 (q), 126.47, 126.3 (q), 125.9, 122.0 (q), 73.9, 72.8, 54.2.

**ESI MS.**  $\text{C}_{10}\text{H}_9\text{ClF}_3\text{O}_3\text{S}$  m/z  $[\text{M}+\text{H}]^+$  calc. 301.0, found 301.0.

**Methyl 2-chloro-2-((4-chlorophenyl)sulfinyl)acetate ( $\pm$ )-6g**

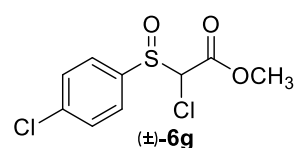

Synthesized by General procedure E.

**Yield:** 81%. Purified by ISCO flash column chromatography (1:1 hexane:EtOAc v/v).

**$^1\text{H NMR}$**  (400 MHz,  $\text{CDCl}_3$ )  $\delta$  7.61 - 7.57 (m, 2H), 7.49 - 7.46 (m, 2H), 5.15 (s, 0.5H), 5.05 (s, 0.5H), 3.75 (s, 1.5H), 3.71 (s, 1.5H).

**$^{13}\text{C NMR}$**  (101 MHz,  $\text{CDCl}_3$ )  $\delta$  163.6, 163.5, 139.2, 138.9, 137.9, 137.6, 129.5, 129.4, 127.1, 126.6, 74.0, 72.8, 53.9.

**ESI MS.**  $\text{C}_9\text{H}_9\text{Cl}_2\text{O}_3\text{S}$  m/z  $[\text{M}+\text{H}]^+$  calc. 267.0, found 266.9.

## VI General Procedure for screening of enzymes for enzymatic resolution

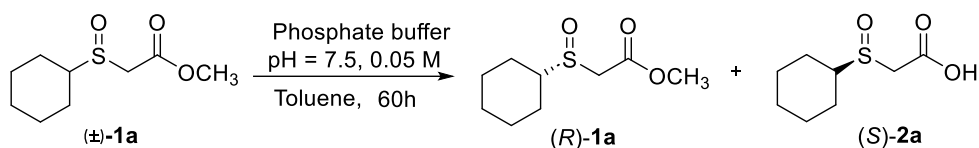

To a solution of ester ( $\pm$ )-**1a** (50 mg, 0.24 mmol) in toluene (0.25 mL) were added phosphate buffer (2.0 mL of pH 7.5, 0.05 M) and enzyme (5 mg, 10 wt%) as indicated in Table S1. This heterogeneous mixture was stirred at 25 °C. The mixture was filtered through celite to remove the enzyme and extracted with EtOAc ( $3 \times 10$  mL). Evaporation of the solvent and ISCO flash chromatography gave enantioenriched ester derivative (*R*)-**1a**.

Acetic acid (0.5 mL) was added and aqueous layer was extracted with  $\text{CH}_2\text{Cl}_2$  ( $3 \times 10$  mL). The combined organic layers were dried over  $\text{Na}_2\text{SO}_4$  and removal of the solvent gave acid (*S*)-**2a**.

Under a nitrogen atmosphere, a solution of (trimethylsilyl)diazomethane (2.0 M solution in diethyl ether, 0.7 mmol) was added to a solution of the acid derivative **2a** (0.07 mmol) in dry MeOH (0.3 mL) at 0 °C. The resulting mixture was warmed slowly to rt and stirred overnight. After completion of the reaction, the solvent was removed in vacuo. Purification by ISCO flash column chromatography afforded the ester derivative (*S*)-**1a**.

**Table S1**

| Entry    | Name of the Enzyme                                           | % conversion by NMR <sup>1</sup> | % ee of <b>1a</b> (chiral HPLC) | Selectivity (E) |
|----------|--------------------------------------------------------------|----------------------------------|---------------------------------|-----------------|
| 1        | Lipase from Burkholderia sp.                                 | 2                                | 0                               | 0               |
| 2        | Lipase from Pseudomonas sp                                   | 3                                | 4                               | <5              |
| 3        | Lipase from Candida sp.                                      | 15                               | 16                              | 24              |
| 4        | Lipase from Rhizopus sp.                                     | 11                               | -3                              | <5              |
| 5        | Lipase from Aspergillus sp.                                  | 44                               | 14                              | 1.6             |
| 6        | Esterase from E. coli                                        | 26                               | -6                              | 1.5             |
| <b>7</b> | <b>Lipoprotein lipase from Burkholderia sp. (EC 3.1.1.3)</b> | <b>50</b>                        | <b>&gt;99</b>                   | <b>&gt;1000</b> |
| 8        | Lipase from Rhizopus oryzae                                  | 17                               | 10                              | 3.2             |

|    |                                                |    |    |     |
|----|------------------------------------------------|----|----|-----|
| 9  | Lipase from <i>Penicillium</i> sp.             | 16 | 13 | 6.0 |
| 10 | Lipase from <i>Candida rugosa</i> .            | 14 | 5  | 2.0 |
| 11 | Lipase from <i>Candida antarctica</i> , type B | 44 | -7 | 1.3 |
| 12 | Lipase from <i>Candida antarctica</i> , type A | 33 | 30 | 5.5 |
| 13 | Lipase from <i>Thermomyces lanuginosus</i>     | 20 | 19 | 8.8 |
| 14 | Lipase from <i>Mucor miehei</i>                | 42 | 15 | 1.7 |
| 15 | Lipase from <i>Alcaligenes</i> sp.             | 30 | 33 | 10  |
| 16 | Esterase from pig liver                        | 33 | 35 | 8.3 |

1: 1,3,5 trimethoxybenzene was used as an internal indicator for NMR

The configurations are assigned by comparing the optical rotations as shown in Table S2.

**Table S2**

| Entry | Compound                | Observed specific rotation $[\alpha]^{25}_D$ | Known specific rotation <sup>1</sup> $[\alpha]_D$ |
|-------|-------------------------|----------------------------------------------|---------------------------------------------------|
| 1     | ( <i>R</i> )- <b>1g</b> | +216.25 (c 0.27, EtOH)                       | +201 (0.0138M, EtOH)                              |
| 2     | ( <i>S</i> )- <b>1g</b> | -199.96 (c 0.26, EtOH)                       | -184 (0.0227M, EtOH)                              |

**Table S3. Enzymatic resolution of  $\alpha$ -sulfinyl carboxylates.<sup>[a]</sup>**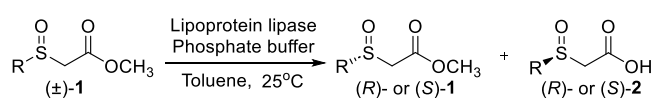

| Entry                | Cmpd         | R                                                                                   | Buffer<br>pH | Time (h) | % Yield 1<br>(% ee) | % Yield 2<br>(% ee) | Selectivity<br>(E) <sup>[d]</sup> |
|----------------------|--------------|-------------------------------------------------------------------------------------|--------------|----------|---------------------|---------------------|-----------------------------------|
| 1 <sup>[b]</sup>     | <b>1a/2a</b> |    | 7.5          | 16       | 46 (>98)            | 30 (99)             | 50                                |
| 2 <sup>[b]</sup>     | <b>1b/2b</b> | <i>n</i> -Hex                                                                       | 9.0          | 12       | 46 (>98)            | 32 (>99)            | 50                                |
| 3                    | <b>1c/2c</b> |    | 7.5          | 16       | 48 (>99)            | 35 (>99)            | 120                               |
| 4                    | <b>1d/2d</b> |    | 7.5          | 15       | 47 (>99)            | 36 (96)             | 80                                |
| 5                    | <b>1e/2e</b> |    | 7.5          | 15       | 46 (>99)            | 35 (>99)            | 61                                |
| 6                    | <b>1f/2f</b> |   | 8.6          | 14       | 45 (>99)            | 33 (>99)            | 49                                |
| 7                    | <b>1g/2g</b> |  | 7.5          | 16       | 45 (>99)            | 33 (98)             | 49                                |
| 8 <sup>[b],[c]</sup> | <b>1h/2h</b> |  | 9.5          | 60       | 44 (>99)            | 30 (89)             | 41                                |

[a] Reactions on a 1 g scale with 10 wt% lipoprotein lipase from *Burkholderia sp.*, 8:1 50 mM phosphate buffer:toluene unless otherwise noted. [b] 30 wt% lipase. [c] 100 mM phosphate buffer. [d] Lower limit to selectivity factor based on recovered starting material according to  $E = \text{Ln}[(1-c)(1-ee)]/\text{Ln}[(1-c)(1+ee)]$ , using 1-yield as conversion (c).

### HPLC of Compound 1a

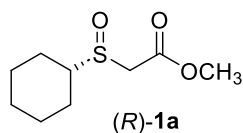

$[\alpha]^{25}_{\text{D}}$  of (*R*)-**1a** +25.99 (c 0.5, EtOH).

**Chiral HPLC** Chiralcel OD-H, 10% IPA/hexanes, 1.0 mL/min, 210nm.



**(±)-1a**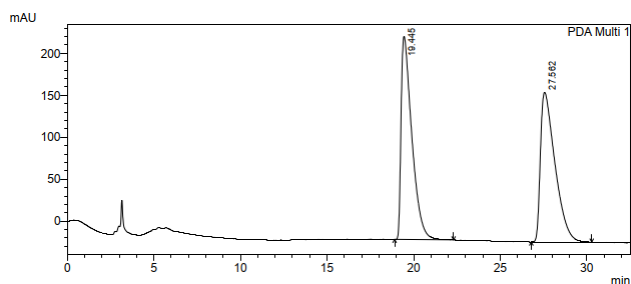

1 PDA Multi 1/210nm 4nm

PeakTable

PDA Ch1 210nm 4nm

| Peak# | Ret. Time | Area     | Area %  |
|-------|-----------|----------|---------|
| 1     | 19.445    | 10460433 | 50.065  |
| 2     | 27.562    | 10433478 | 49.935  |
| Total |           | 20893911 | 100.000 |

**(R)-1a**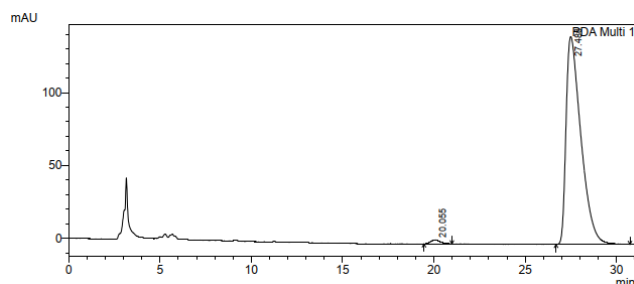

1 PDA Multi 1/210nm 4nm

PeakTable

PDA Ch1 210nm 4nm

| Peak# | Ret. Time | Area    | Area %  |
|-------|-----------|---------|---------|
| 1     | 20.055    | 100217  | 1.231   |
| 2     | 27.486    | 8038443 | 98.769  |
| Total |           | 8138661 | 100.000 |

**HPLC of Compound 1b**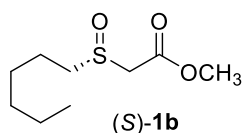 $[\alpha]^{25}_D$  of (S)-1b -23.19 (c 0.25, EtOH). $[\alpha]^{25}_D$  of (R)-1b +25.18 (c 0.135, EtOH)

Chiral HPLC Chiralcel OD-H, 10% IPA/hexanes, 1.0 mL/min, 254nm.

**(±)-1b**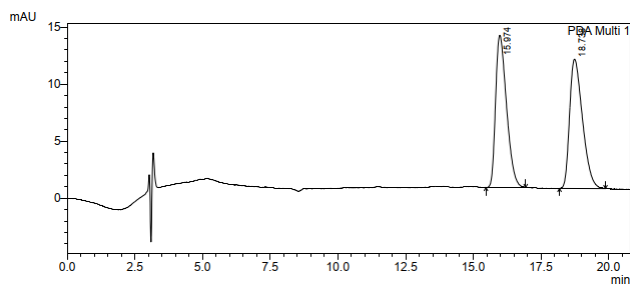

1 PDA Multi 1/254nm 4nm

PeakTable

PDA Ch1 254nm 4nm

| Peak# | Ret. Time | Area   | Area %  |
|-------|-----------|--------|---------|
| 1     | 15.974    | 375177 | 49.935  |
| 2     | 18.738    | 376160 | 50.065  |
| Total |           | 751337 | 100.000 |

### (S)-1b

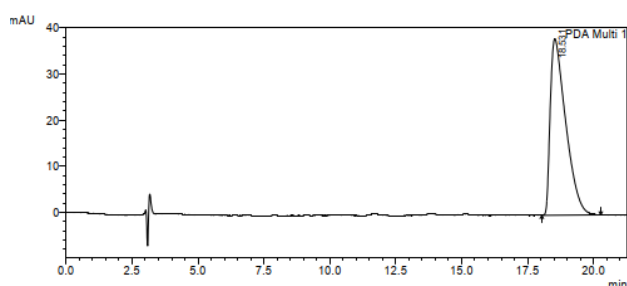

1 PDA Multi 1/254nm 4nm

PeakTable

| PDA Ch1 254nm 4nm |           |         |         |
|-------------------|-----------|---------|---------|
| Peak#             | Ret. Time | Area    | Area %  |
| 1                 | 18.531    | 1561190 | 100.000 |
| Total             |           | 1561190 | 100.000 |

### (R)-1b {from (R)-2b}

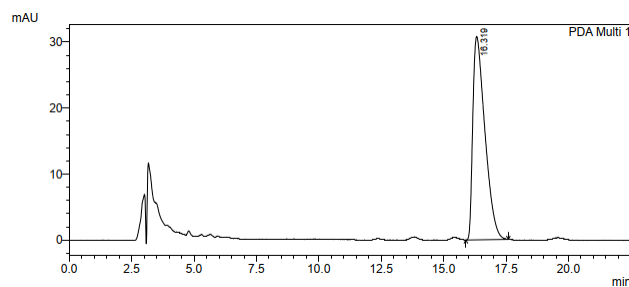

1 PDA Multi 1/254nm 4nm

PeakTable

| PDA Ch1 254nm 4nm |           |         |         |
|-------------------|-----------|---------|---------|
| Peak#             | Ret. Time | Area    | Area %  |
| 1                 | 16.319    | 1039233 | 100.000 |
| Total             |           | 1039233 | 100.000 |

### HPLC of Compound 1c

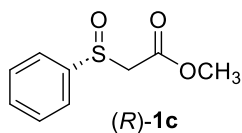

$[\alpha]^{25}_D$  of (R)-1c +234.34 (c 0.25, EtOH).

$[\alpha]^{25}_D$  of (S)-1c -203.29 (c 0.18, EtOH).

Chiral HPLC Chiralcel OD-H, 30% IPA/hexanes, 1.0 mL/min, 254nm.

### (±)-1c

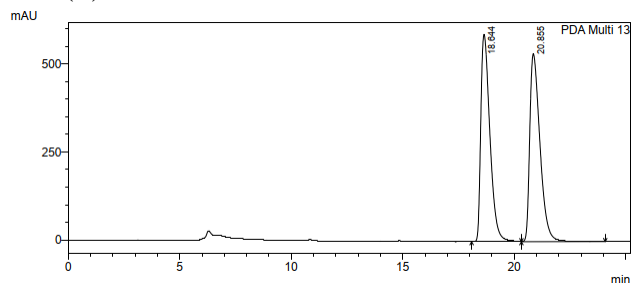

1 PDA Multi 13/254nm 4nm

PeakTable

| PDA Ch13 254nm 4nm |           |          |         |
|--------------------|-----------|----------|---------|
| Peak#              | Ret. Time | Area     | Area %  |
| 1                  | 18.644    | 16706357 | 49.568  |
| 2                  | 20.855    | 16997620 | 50.432  |
| Total              |           | 33703977 | 100.000 |

### (R)-1c

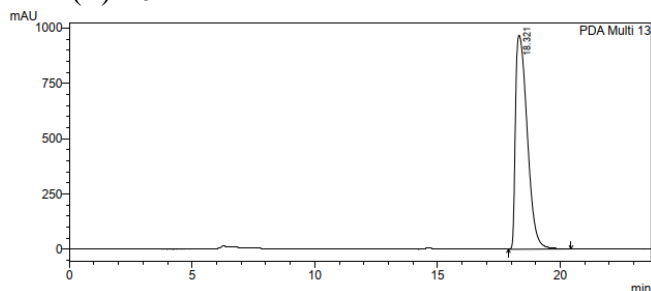

1 PDA Multi 13/254nm 4nm

PeakTable

| PDA Ch13 254nm 4nm |           |          |         |
|--------------------|-----------|----------|---------|
| Peak#              | Ret. Time | Area     | Area %  |
| 1                  | 18.321    | 32231790 | 100.000 |
| Total              |           | 32231790 | 100.000 |

### (S)-1c {from (S)-2c}

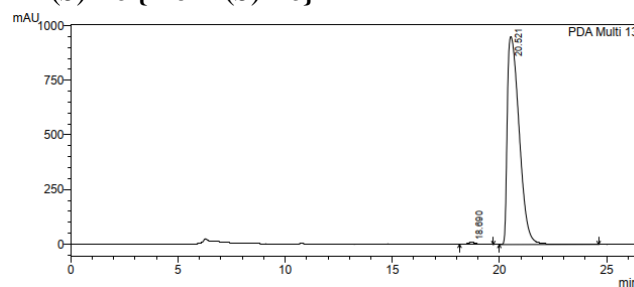

1 PDA Multi 13/254nm 4nm

PeakTable

| PDA Ch13 254nm 4nm |           |          |         |
|--------------------|-----------|----------|---------|
| Peak#              | Ret. Time | Area     | Area %  |
| 1                  | 18.690    | 253616   | 0.689   |
| 2                  | 20.521    | 36573263 | 99.311  |
| Total              |           | 36826879 | 100.000 |

## HPLC of Compound 1d

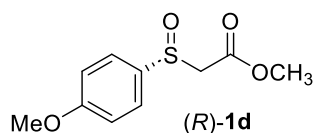

$[\alpha]^{27}_D$  of (R)-1d +191.94 (c 0.25, EtOH).

$[\alpha]^{27}_D$  of (S)-1d -151.16 (c 0.25, EtOH)

Chiral HPLC Chiralpak AD-H, 5% IPA/hexanes, 1.0 mL/min, 254nm.

(±)-1d

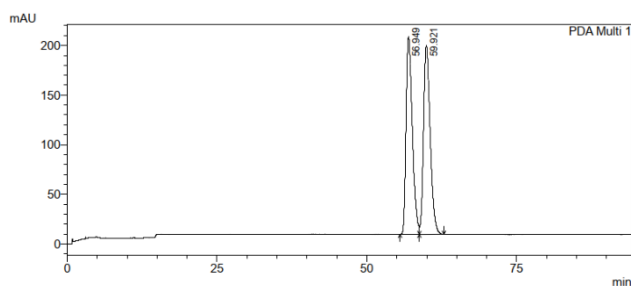

1 PDA Multi 1/254nm 4nm

PeakTable

PDA Ch1 254nm 4nm

| Peak# | Ret. Time | Area     | Area %  |
|-------|-----------|----------|---------|
| 1     | 56.949    | 14536098 | 49.721  |
| 2     | 59.921    | 14699138 | 50.279  |
| Total |           | 29235236 | 100.000 |

(R)-1d

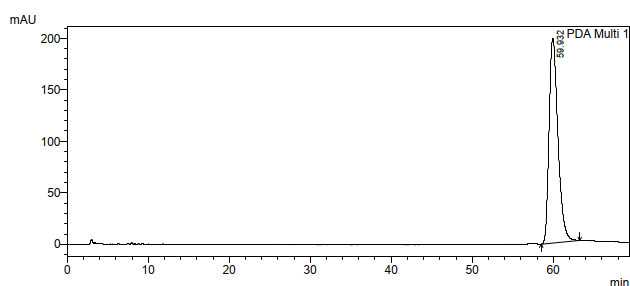

(S)-1d {from (S)-2d}

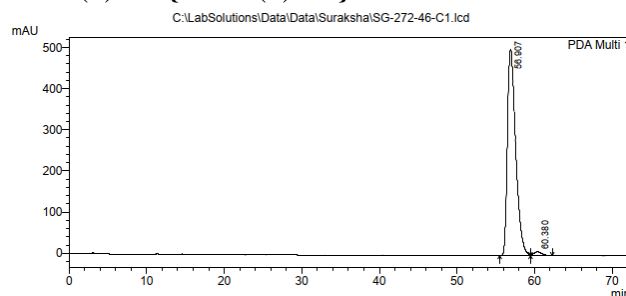

1 PDA Multi 1/254nm 4nm

1 PDA Multi 1/254nm 4nm

PeakTable

PDA Ch1 254nm 4nm

| Peak# | Ret. Time | Area     | Area %  |
|-------|-----------|----------|---------|
| 1     | 59.932    | 15153000 | 100.000 |
| Total |           | 15153000 | 100.000 |

PeakTable

PDA Ch1 254nm 4nm

| Peak# | Ret. Time | Area     | Area %  |
|-------|-----------|----------|---------|
| 1     | 56.907    | 37303441 | 98.164  |
| 2     | 60.380    | 697872   | 1.836   |
| Total |           | 38001314 | 100.000 |

## HPLC of Compound 1e

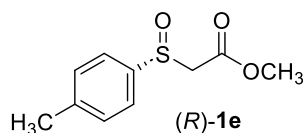

$[\alpha]^{25}_D$  of (R)-1e +217.29 (c 0.15, EtOH)

$[\alpha]^{26}_D$  of (S)-1e -147.96 (c 0.25, EtOH)

Chiral HPLC Chiralcel OD-H, 10% IPA/hexanes, 1.0 mL/min, 254nm.

**(±)-1e**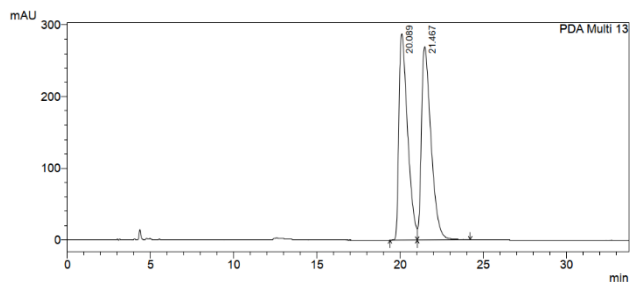

1 PDA Multi 13/254nm 4nm

PeakTable

| Peak# | Ret. Time | Area     | Area %  |
|-------|-----------|----------|---------|
| 1     | 20.089    | 10422464 | 49.069  |
| 2     | 21.467    | 10817838 | 50.931  |
| Total |           | 21240302 | 100.000 |

**(R)-1e**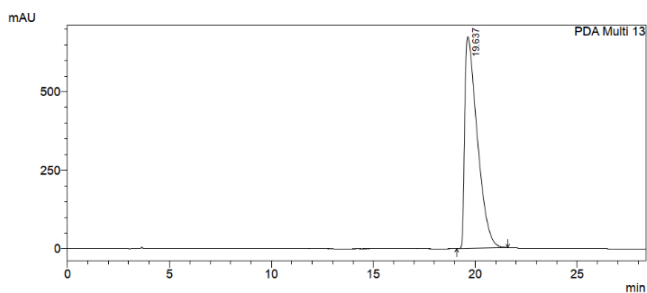

1 PDA Multi 13/254nm 4nm

PeakTable

| Peak# | Ret. Time | Area     | Area %  |
|-------|-----------|----------|---------|
| 1     | 19.637    | 28895161 | 100.000 |
| Total |           | 28895161 | 100.000 |

**(S)-1e {from (S)-2e}**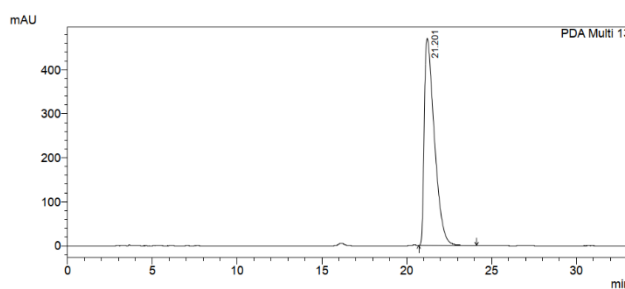

1 PDA Multi 13/254nm 4nm

PeakTable

| Peak# | Ret. Time | Area     | Area %  |
|-------|-----------|----------|---------|
| 1     | 21.201    | 19537487 | 100.000 |
| Total |           | 19537487 | 100.000 |

**HPLC of Compound 1f**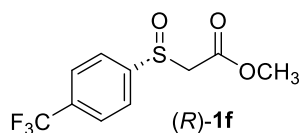 $[\alpha]^{25}_D$  of (R)-1f +211.80 (c 0.135, EtOH) $[\alpha]^{25}_D$  of (S)-1f -180.76 (c 0.125, EtOH)

Chiral HPLC Chiralcel OD-H, 10% IPA/hexanes, 1.0 mL/min, 254nm.

**(±)-1f**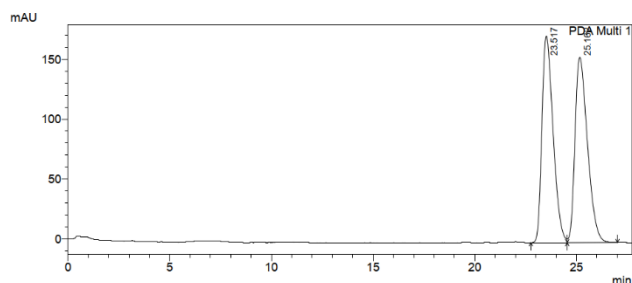

1 PDA Multi 1/254nm 4nm

PeakTable

| Peak# | Ret. Time | Area     | Area %  |
|-------|-----------|----------|---------|
| 1     | 23.517    | 6573511  | 49.843  |
| 2     | 25.162    | 6615035  | 50.157  |
| Total |           | 13188547 | 100.000 |

**(R)-1f**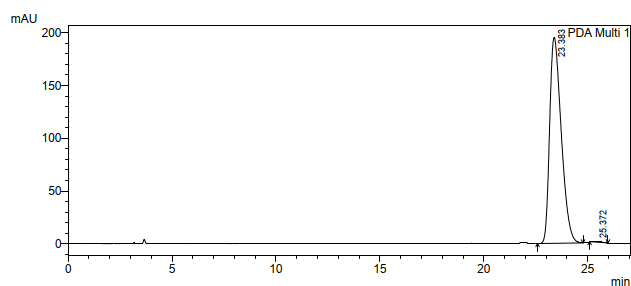

1 PDA Multi 1/254nm 4nm

PeakTable

PDA Ch1 254nm 4nm

| Peak# | Ret. Time | Area    | Area %  |
|-------|-----------|---------|---------|
| 1     | 23.383    | 7565747 | 99.715  |
| 2     | 25.372    | 21615   | 0.285   |
| Total |           | 7587362 | 100.000 |

**(S)-1f {from (S)-2f}**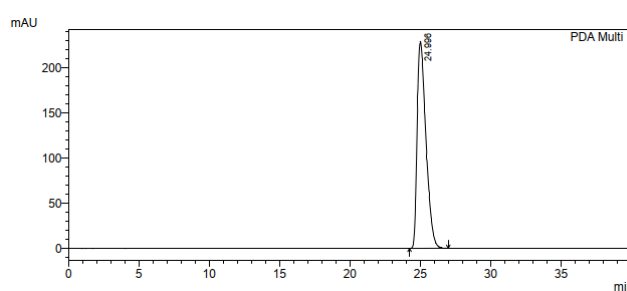

1 PDA Multi 1/254nm 4nm

PeakTable

PDA Ch1 254nm 4nm

| Peak# | Ret. Time | Area    | Area %  |
|-------|-----------|---------|---------|
| 1     | 24.996    | 9944800 | 100.000 |
| Total |           | 9944800 | 100.000 |

**HPLC of Compound 1g**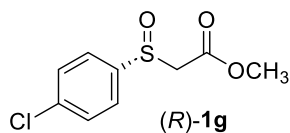 $[\alpha]_D^{25}$  of **(R)-1g** +216.25 (c 0.27, EtOH) $[\alpha]_D^{25}$  of **(S)-1g** -199.96 (c 0.26, EtOH)**Chiral HPLC** Chiralpak AD-H, 10% IPA/hexanes, 1.0 mL/min, 254nm.**(±)-1g**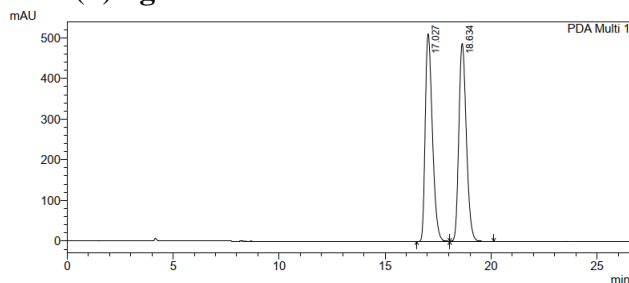

1 PDA Multi 1/254nm 4nm

PeakTable

PDA Ch1 254nm 4nm

| Peak# | Ret. Time | Area     | Area %  |
|-------|-----------|----------|---------|
| 1     | 17.027    | 11992085 | 49.883  |
| 2     | 18.634    | 12048166 | 50.117  |
| Total |           | 24040251 | 100.000 |

**(R)-1g**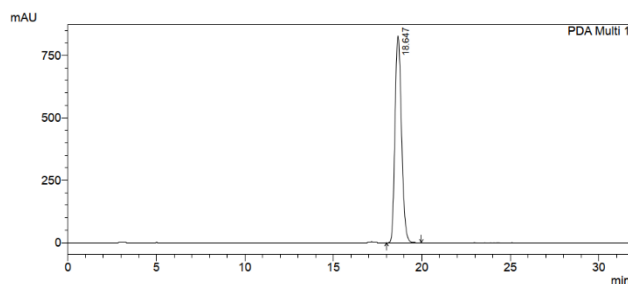

1 PDA Multi 1/254nm 4nm

PeakTable

PDA Ch1 254nm 4nm

| Peak# | Ret. Time | Area     | Area %  |
|-------|-----------|----------|---------|
| 1     | 18.647    | 21302560 | 100.000 |
| Total |           | 21302560 | 100.000 |

**(S)-1g {from (S)-2g}**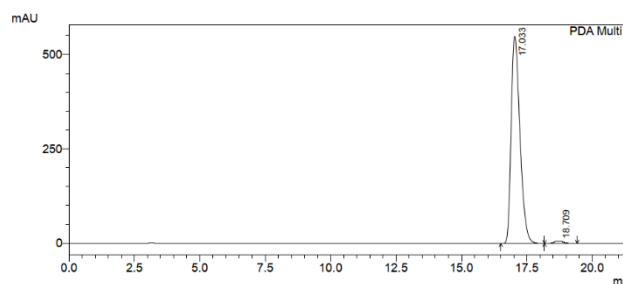

1 PDA Multi 1/254nm 4nm

PeakTable

PDA Ch1 254nm 4nm

| Peak# | Ret. Time | Area     | Area %  |
|-------|-----------|----------|---------|
| 1     | 17.033    | 12843593 | 98.818  |
| 2     | 18.709    | 153647   | 1.182   |
| Total |           | 12997240 | 100.000 |

## HPLC of Compound 1h

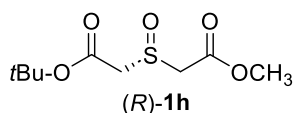

$[\alpha]^{25}_{\text{D}}$  of (R)-1h -15.99 (c 0.20, EtOH).

$[\alpha]^{25}_{\text{D}}$  of (S)-1h +12.30 (c 0.13, EtOH).

Chiral HPLC Chiralcel OD-H, 10% IPA/hexanes, 1.0 mL/min, 229nm.

(±)-1h

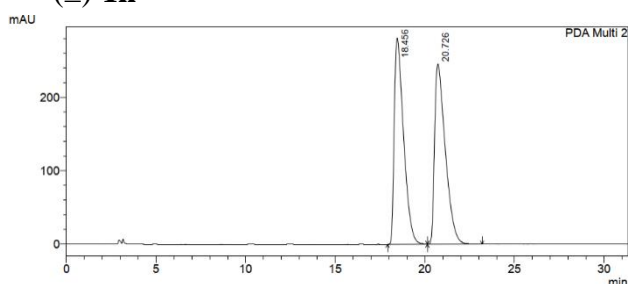

1 PDA Multi 2/229nm 4nm

PeakTable

PDA Ch2 229nm 4nm

| Peak# | Ret. Time | Area     | Area %  |
|-------|-----------|----------|---------|
| 1     | 18.456    | 10213279 | 49.926  |
| 2     | 20.726    | 10243399 | 50.074  |
| Total |           | 20456678 | 100.000 |

(R)-1h

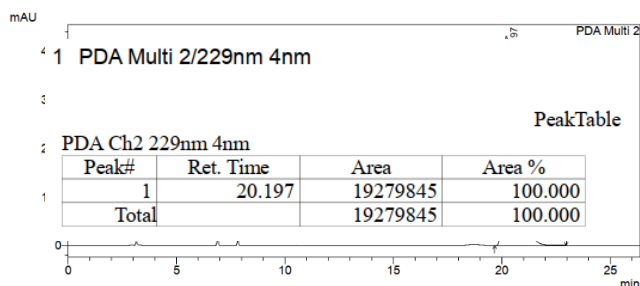

(S)-1h {from (S)-2h}

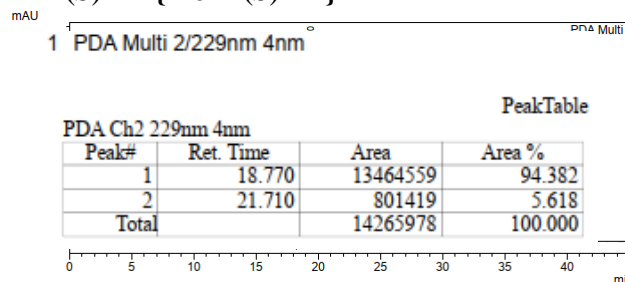

## VII General procedure for enzymatic resolution of α-Chloro sulfinyl acetate.

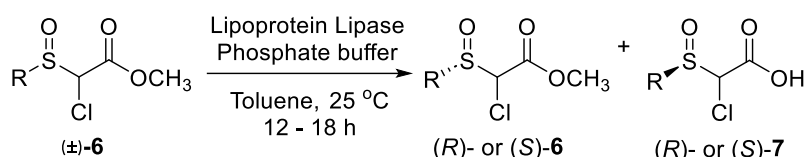

To a solution of the ester (±)-6 (0.5 mmol) in toluene (0.5 mL) were added phosphate buffer (4.0 mL, see table 2 in manuscript) and Lipoprotein lipase (20 wt%). This heterogeneous mixture was stirred at 25 °C. The mixture was filtered through celite to remove the enzyme and extracted with EtOAc (3 × 15 mL). Evaporation of the solvent and ISCO flash chromatography gave enantiopure ester 6.

1N HCl was added to the aqueous layer to bring pH 3.0 and aqueous layer was extracted first with EtOAc (3 × 15 mL) then with DCM (3 × 15 mL). The combined organic layers were dried over Na<sub>2</sub>SO<sub>4</sub> and concentration in vacuo gave acid 7.

Under a nitrogen atmosphere, a solution of (trimethylsilyl)diazomethane (0.5 mL, 2.0 M solution in diethyl ether, 1.0 mmol, 5.0 equiv) was added to a solution of the acid derivative 7 (0.2 mmol, 1.0 equiv) in dry MeOH (0.5 mL) at 0 °C. The resulting mixture was warmed slowly to rt and stirred overnight. After completion of the reaction, the solvent was removed in vacuo. Purification by ISCO flash column chromatography afforded the ester derivative.

**Table S4. Asymmetric synthesis of chloromethyl sulfoxides.<sup>[a]</sup>**

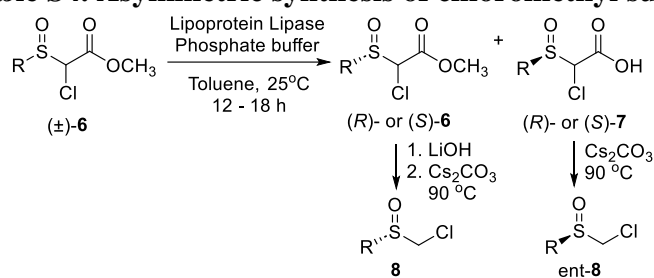

| Entry            | R             | pH  | % Yield <b>6</b><br>(% ee) | % Yield <b>7</b><br>(% ee) | % Yield <b>8</b><br>(% ee)                                                   | Selectivity<br>(E) <sup>[c]</sup> |
|------------------|---------------|-----|----------------------------|----------------------------|------------------------------------------------------------------------------|-----------------------------------|
| 1 <sup>[b]</sup> |               | 9.5 | 39 (>99)                   | unstable                   | --                                                                           | 22                                |
| 2 <sup>[b]</sup> | <i>n</i> -Hex | 9.5 | 41 (>99)                   | 28 (99)                    | ( <i>S</i> )- <b>8b</b><br>65 (99)                                           | 27                                |
| 3                |               | 8.6 | 46 (>99)                   | 35 (>99)                   | ( <i>S</i> )- <b>8c</b> :<br>81 (98)<br>( <i>R</i> )- <b>8c</b> :<br>78 (99) | 41                                |
| 4                |               | 8.6 | 42 (>99)                   | 32 (90)                    | ( <i>S</i> )- <b>8d</b><br>80 (99)                                           | 31                                |
| 5                |               | 8.6 | 41 (>99)                   | 30 (93)                    | ( <i>S</i> )- <b>8e</b><br>73 (97)                                           | 27                                |
| 6                |               | 8.6 | 40 (>99)                   | 25 (95)                    | ( <i>S</i> )- <b>8f</b><br>66 (>99)                                          | 24                                |
| 7                |               | 8.6 | 40 (>99)                   | 31 (98)                    | ( <i>S</i> )- <b>8g</b><br>81 (>99)                                          | 24                                |

[a] Reactions on a 0.1-0.2 g scale with 20 wt% enzyme, 8:1 50 mM phosphate buffer : toluene unless otherwise noted. [b] 100 mM phosphate buffer. [c] Lower limit to selectivity factor based on recovered starting material according to  $E = \ln[(1-c)(1-ee)]/\ln[(1-c)(1+ee)]$ , using 1-yield as conversion (c).

### HPLC of Compound **6a**

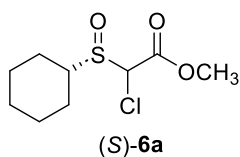

$[\alpha]^{25.8}_D$  of (*S*)-**6a** +27.19 (c 0.125, EtOH)

Chiral HPLC Chiralpak AS-H, 10% IPA/hexanes, 1.0 mL/min, 229nm.

(±)-**6a**

(*S*)-**6a**

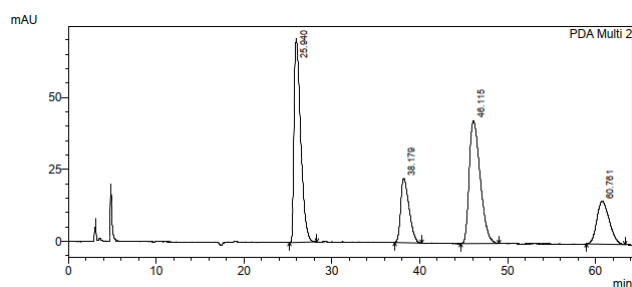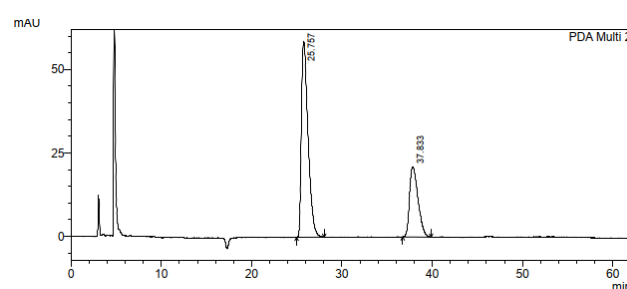

1 PDA Multi 2/229nm 4nm

PeakTable

| PDA Ch2 229nm 4nm |           |          |         |
|-------------------|-----------|----------|---------|
| Peak#             | Ret. Time | Area     | Area %  |
| 1                 | 25.940    | 3738557  | 35.877  |
| 2                 | 38.179    | 1485675  | 14.257  |
| 3                 | 46.115    | 3719914  | 35.698  |
| 4                 | 60.761    | 1476221  | 14.167  |
| Total             |           | 10420367 | 100.000 |

### HPLC of Compound 6b

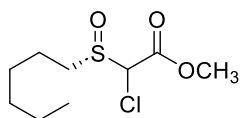

(S)-6b

$[\alpha]^{25.8}_D$  of (S)-6b -39.99 (c 0.15, EtOH)

$[\alpha]^{25}_D$  of (R)-6b +35.55 (c 0.135, EtOH)

Chiral HPLC Chiralpak AS-H, 10% IPA/hexanes, 1.0 mL/min, 254nm.

(±)-6b

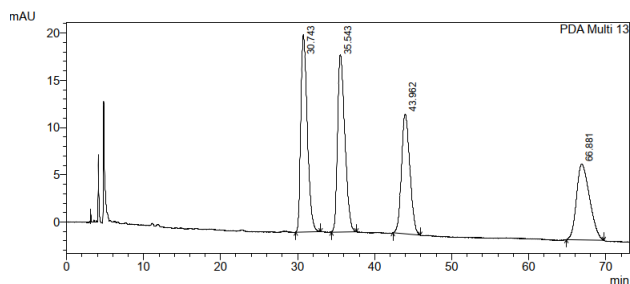

(S)-6b

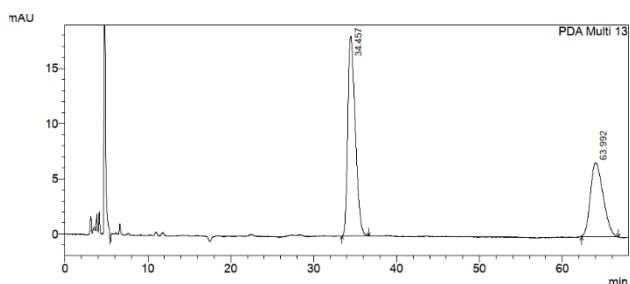

1 PDA Multi 13/254nm 4nm

PeakTable

| PDA Ch13 254nm 4nm |           |         |         |
|--------------------|-----------|---------|---------|
| Peak#              | Ret. Time | Area    | Area %  |
| 1                  | 34.457    | 1130976 | 61.006  |
| 2                  | 63.992    | 722904  | 38.994  |
| Total              |           | 1853880 | 100.000 |

### HPLC of Compound 6c

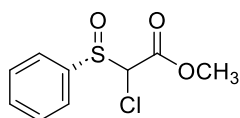

(S)-6c

1 PDA Multi 2/229nm 4nm

PeakTable

| PDA Ch2 229nm 4nm |           |         |         |
|-------------------|-----------|---------|---------|
| Peak#             | Ret. Time | Area    | Area %  |
| 1                 | 25.757    | 3025605 | 68.603  |
| 2                 | 37.833    | 1384721 | 31.397  |
| Total             |           | 4410326 | 100.000 |

1 PDA Multi 13/254nm 4nm

PeakTable

| PDA Ch13 254nm 4nm |           |         |         |
|--------------------|-----------|---------|---------|
| Peak#              | Ret. Time | Area    | Area %  |
| 1                  | 30.743    | 1232105 | 28.183  |
| 2                  | 35.543    | 1233811 | 28.222  |
| 3                  | 43.962    | 959235  | 21.942  |
| 4                  | 66.881    | 946612  | 21.653  |
| Total              |           | 4371763 | 100.000 |

(R)-6b {from (R)-7b}

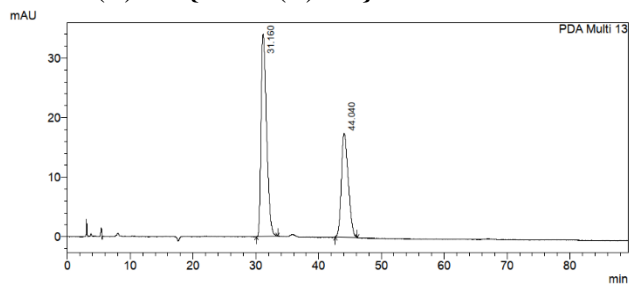

1 PDA Multi 13/254nm 4nm

PeakTable

| PDA Ch13 254nm 4nm |           |         |         |
|--------------------|-----------|---------|---------|
| Peak#              | Ret. Time | Area    | Area %  |
| 1                  | 31.160    | 2099156 | 61.195  |
| 2                  | 44.040    | 1331124 | 38.805  |
| Total              |           | 3430280 | 100.000 |



$[\alpha]^{25}_D$  of (*S*)-**6c** +173.68 (c 0.525, EtOH)

$[\alpha]^{25}_D$  of (*R*)-**6c** -132.28 (c 0.130, EtOH)

Chiral HPLC Chiralpak AS-H, 30% IPA/hexanes, 1.0 mL/min, 254nm.

(±)-**6c**

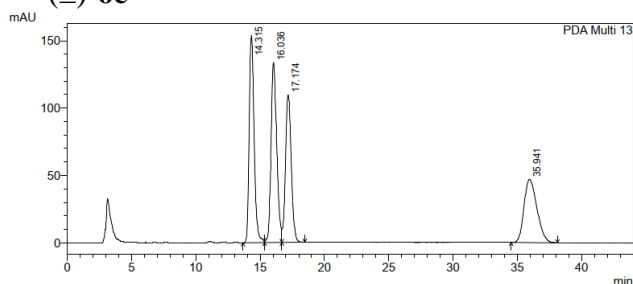

1 PDA Multi 13/254nm 4nm

PeakTable

PDA Ch13 254nm 4nm

| Peak# | Ret. Time | Area     | Area %  |
|-------|-----------|----------|---------|
| 1     | 14.315    | 4090148  | 27.462  |
| 2     | 16.036    | 4121423  | 27.672  |
| 3     | 17.174    | 3403633  | 22.853  |
| 4     | 35.941    | 3278699  | 22.014  |
| Total |           | 14893903 | 100.000 |

(*S*)-**6c**

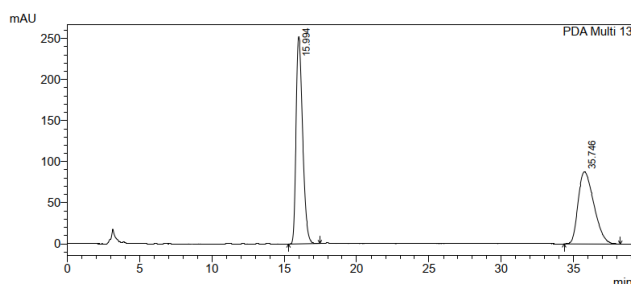

1 PDA Multi 13/254nm 4nm

PeakTable

PDA Ch13 254nm 4nm

| Peak# | Ret. Time | Area     | Area %  |
|-------|-----------|----------|---------|
| 1     | 15.994    | 7949327  | 54.407  |
| 2     | 35.746    | 6661638  | 45.593  |
| Total |           | 14610965 | 100.000 |

(*R*)-**6c** {from (*R*)-**7c**}

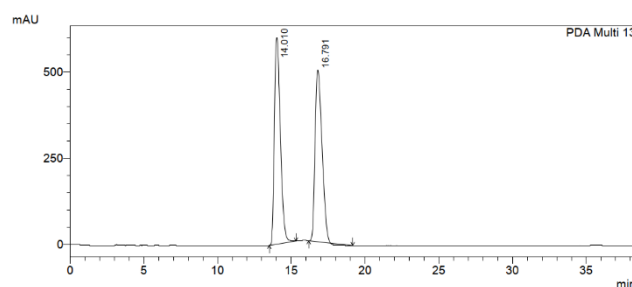

1 PDA Multi 13/254nm 4nm

PeakTable

PDA Ch13 254nm 4nm

| Peak# | Ret. Time | Area     | Area %  |
|-------|-----------|----------|---------|
| 1     | 14.010    | 16877790 | 50.971  |
| 2     | 16.791    | 16234513 | 49.029  |
| Total |           | 33112302 | 100.000 |

## HPLC of Compound 6d

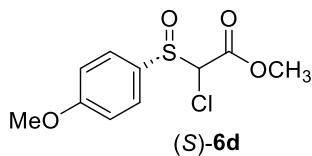

$[\alpha]^{25.5}_D$  of (*S*)-**6d** +158.63 (c 0.150, EtOH)

$[\alpha]^{25}_D$  of (*R*)-**6d** -136.44 (c 0.085, EtOH)

Chiral HPLC Chiralpak AS-H, 30% IPA/hexanes, 1.0 mL/min, 254nm.

(±)-**6d**

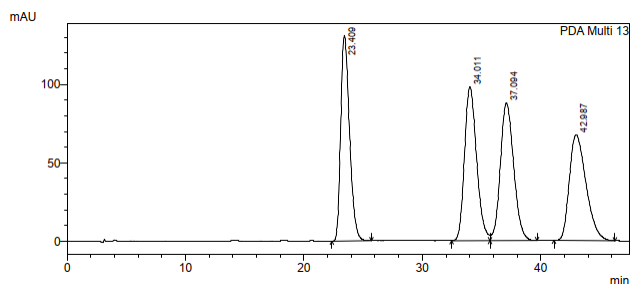

1 PDA Multi 13/254nm 4nm

PeakTable

PDA Ch13 254nm 4nm

| Peak# | Ret. Time | Area     | Area %  |
|-------|-----------|----------|---------|
| 1     | 23.409    | 6787596  | 24.901  |
| 2     | 34.011    | 6958937  | 25.529  |
| 3     | 37.094    | 6882651  | 25.250  |
| 4     | 42.987    | 6629305  | 24.320  |
| Total |           | 27258490 | 100.000 |

### (S)-6d

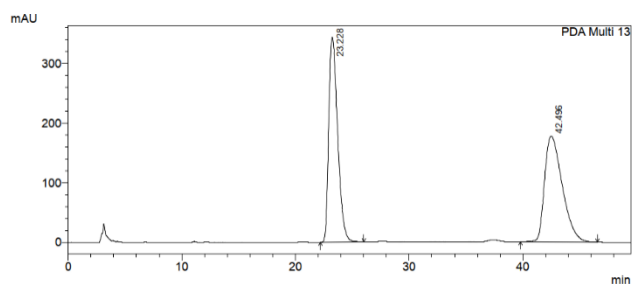

1 PDA Multi 13/254nm 4nm

PeakTable

| Peak# | Ret. Time | Area     | Area %  |
|-------|-----------|----------|---------|
| 1     | 23.228    | 18743015 | 49.384  |
| 2     | 42.496    | 19210670 | 50.616  |
| Total |           | 37953685 | 100.000 |

### (R)-6d {from (R)-7d}

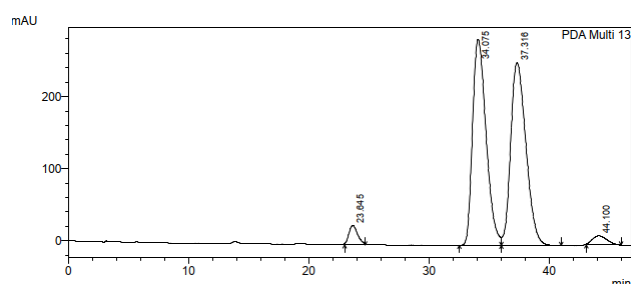

1 PDA Multi 13/254nm 4nm

PeakTable

| Peak# | Ret. Time | Area     | Area %  |
|-------|-----------|----------|---------|
| 1     | 23.645    | 1377774  | 2.915   |
| 2     | 34.075    | 22406459 | 47.414  |
| 3     | 37.316    | 22400257 | 47.400  |
| 4     | 44.100    | 1072974  | 2.270   |
| Total |           | 47257463 | 100.000 |

### HPLC of Compound 6e

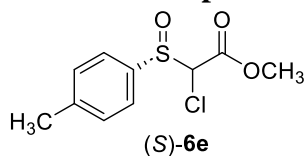

$[\alpha]^{25}_D$  of (S)-6e +173.68 (c 0.525, EtOH)

$[\alpha]^{25}_D$  of (R)-6e -132.28 (c 0.130, EtOH)

Chiral HPLC Chiralcel OJ-H, 10% IPA/hexanes, 1.0 mL/min, 229nm.

(±)-6e

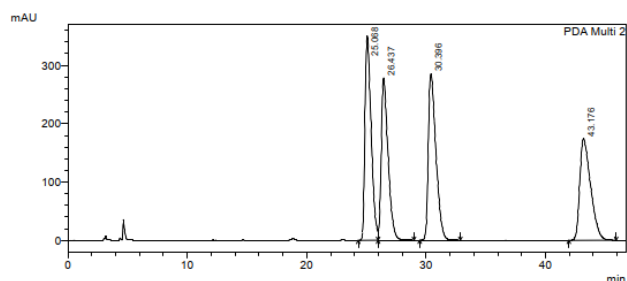

1 PDA Multi 2/229nm 4nm

PeakTable

| Peak# | Ret. Time | Area     | Area %  |
|-------|-----------|----------|---------|
| 1     | 25.068    | 12541291 | 26.542  |
| 2     | 26.437    | 11105851 | 23.504  |
| 3     | 30.396    | 12642965 | 26.757  |
| 4     | 43.176    | 10960414 | 23.196  |
| Total |           | 47250521 | 100.000 |

### (S)-6e

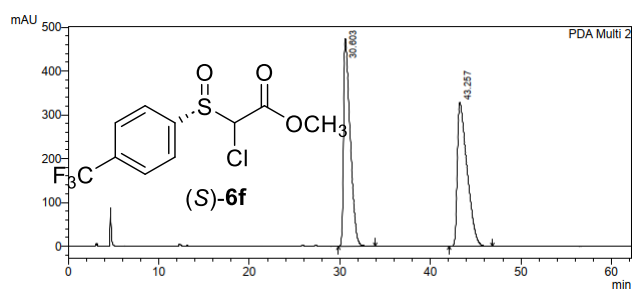

1 PDA Multi 2/229nm 4nm

| PDA Ch2 229nm 4nm |           |          |         |
|-------------------|-----------|----------|---------|
| Peak#             | Ret. Time | Area     | Area %  |
| 1                 | 30.603    | 24166534 | 49.652  |
| 2                 | 43.257    | 24504906 | 50.348  |
| Total             |           | 48671440 | 100.000 |

### (R)-6e {from (R)-7e}

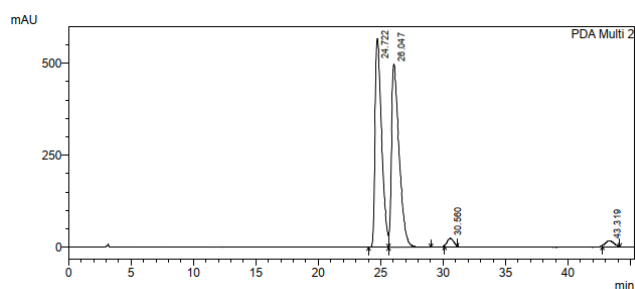

1 PDA Multi 2/229nm 4nm

| PDA Ch2 229nm 4nm |           |          |         |
|-------------------|-----------|----------|---------|
| Peak#             | Ret. Time | Area     | Area %  |
| 1                 | 24.722    | 20545189 | 47.494  |
| 2                 | 26.047    | 21166112 | 48.929  |
| 3                 | 30.560    | 796943   | 1.842   |
| 4                 | 43.319    | 750518   | 1.735   |
| Total             |           | 43258762 | 100.000 |

## HPLC of Compound 6f

$[\alpha]^{25}_D$  of (S)-6f +143.17 (c 0.250, EtOH)

$[\alpha]^{25}_D$  of (R)-6f -31.99 (c 0.050, EtOH)

Chiral HPLC Chiralpak AS-H, 20% IPA/hexanes, 1.0 mL/min, 254nm.

### (±)-6f

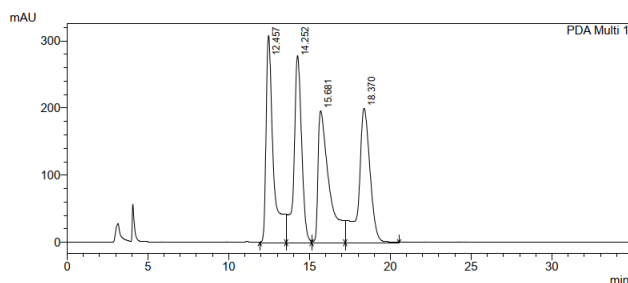

1 PDA Multi 1/254nm 4nm

| PDA Ch1 254nm 4nm |           |          |         |
|-------------------|-----------|----------|---------|
| Peak#             | Ret. Time | Area     | Area %  |
| 1                 | 12.457    | 9660773  | 25.276  |
| 2                 | 14.252    | 9283964  | 24.291  |
| 3                 | 15.681    | 9408999  | 24.618  |
| 4                 | 18.370    | 9866761  | 25.815  |
| Total             |           | 38220497 | 100.000 |

### (S)-6f

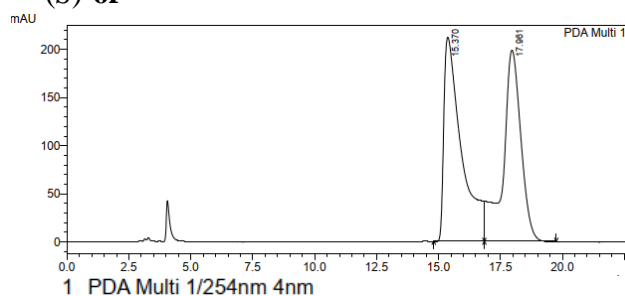

1 PDA Multi 1/254nm 4nm

| PDA Ch1 254nm 4nm |           |          |         |
|-------------------|-----------|----------|---------|
| Peak#             | Ret. Time | Area     | Area %  |
| 1                 | 15.370    | 10386203 | 51.147  |
| 2                 | 17.961    | 9920448  | 48.853  |
| Total             |           | 20306650 | 100.000 |

### (R)-6f {from (R)-7f}

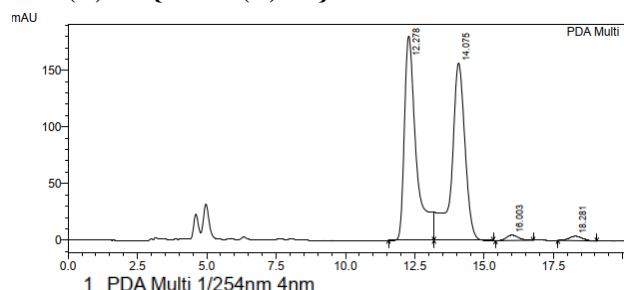

1 PDA Multi 1/254nm 4nm

| PDA Ch1 254nm 4nm |           |          |         |
|-------------------|-----------|----------|---------|
| Peak#             | Ret. Time | Area     | Area %  |
| 1                 | 12.278    | 5357937  | 49.006  |
| 2                 | 14.075    | 5298470  | 48.462  |
| 3                 | 16.003    | 143828   | 1.316   |
| 4                 | 18.281    | 132930   | 1.216   |
| Total             |           | 10933165 | 100.000 |

## HPLC of Compound 6g

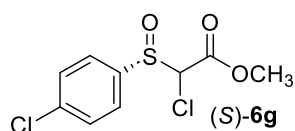

$[\alpha]^{25.7}_D$  of (S)-6g +147.16 (c 0.125, EtOH)

$[\alpha]^{25}_D$  of (R)-6g -164.76 (c 0.125, EtOH)

Chiral HPLC Chiralcel OJ-H, 10% IPA/hexanes, 1.0 mL/min, 254nm

(±)-6g

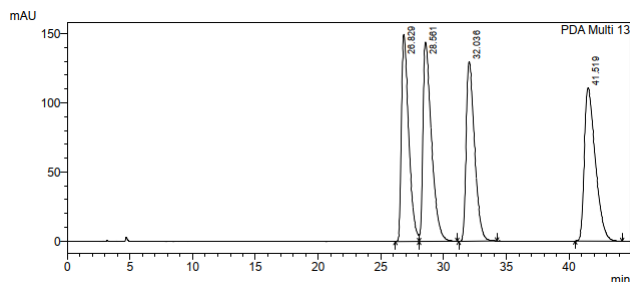

1 PDA Multi 13/254nm 4nm

PeakTable

PDA Ch13 254nm 4nm

| Peak# | Ret. Time | Area     | Area %  |
|-------|-----------|----------|---------|
| 1     | 26.829    | 6084353  | 23.681  |
| 2     | 28.561    | 6840163  | 26.623  |
| 3     | 32.036    | 6032330  | 23.478  |
| 4     | 41.519    | 6736283  | 26.218  |
| Total |           | 25693128 | 100.000 |

(S)-6g

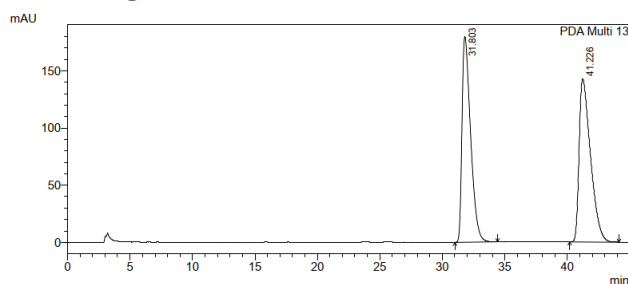

1 PDA Multi 13/254nm 4nm

PeakTable

PDA Ch13 254nm 4nm

| Peak# | Ret. Time | Area     | Area %  |
|-------|-----------|----------|---------|
| 1     | 31.803    | 8610417  | 48.769  |
| 2     | 41.226    | 9045212  | 51.231  |
| Total |           | 17655630 | 100.000 |

(R)-6g {from (R)-7g}

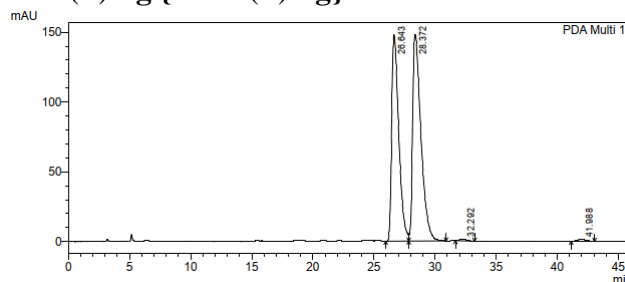

1 PDA Multi 13/254nm 4nm

PeakTable

PDA Ch13 254nm 4nm

| Peak# | Ret. Time | Area     | Area %  |
|-------|-----------|----------|---------|
| 1     | 26.643    | 5909401  | 45.315  |
| 2     | 28.372    | 7010928  | 53.762  |
| 3     | 32.292    | 48458    | 0.372   |
| 4     | 41.988    | 71969    | 0.552   |
| Total |           | 13040756 | 100.000 |

## VII. General procedure for methyl ester hydrolysis

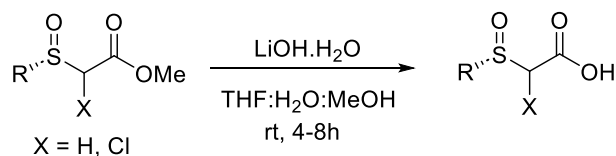

A mixture of methyl ester (1.0 mmol, 1.0 equiv), lithium hydroxide (63 mg, 1.5 mmol, 1.5 equiv), THF (2 mL), water (1 mL) and MeOH (0.5 mL) was stirred at room temperature for 4h. The organic solvent was removed under reduced pressure, and the residue obtained was then acidified to pH 5 with 1 N HCl, and the mixture was extracted with EtOAc (3 × 10 mL). The combined extracts were dried over anhydrous Na<sub>2</sub>SO<sub>4</sub>, filtered, and concentrated under reduced pressure to give the crude acid which was used for the next step without further purification.

## VIII. General procedure for Barton decarboxylative bromination

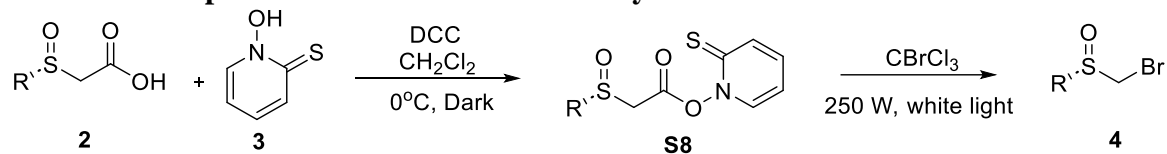

To an ice cold solution of sulfoxide acetic acid **2** (0.2 mmol, 1.0 equiv) in dry, degassed  $\text{CH}_2\text{Cl}_2$  (2 mL) was added N-hydroxypyridine-2-thione **3** (30 mg, 0.24 mmol, 1.2 equiv). After stirring for 5 min. DCC (49 mg, 0.24 mmol, 1.2 equiv) in  $\text{CH}_2\text{Cl}_2$  (1 mL) was added and stirred for 30 min. at rt. Then the mixture was filtered through a celite pad and concentrated under reduced pressure without heating gave crude product which was used for the next step without further purification.

**Irradiation of Ester in the presence of  $\text{BrCCl}_3$ .** An ice-cold solution of ester **S8** (0.2 mmol) in dry, degassed  $\text{BrCCl}_3$  (2 mL) was irradiated with a 250 W tungsten lamp under an inert atmosphere until the disappearance of the starting material as monitored by LCMS. Concentration and ISCO flash chromatography gave the desired product **4**.

### (*S*)- ((Bromomethyl)sulfinyl)cyclohexane **4a**

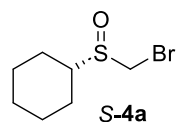

**Yield:** 68%. Purified by ISCO flash column chromatography (4:1 hexane:EtOAc v/v).

$^1\text{H NMR}$  (400 MHz,  $\text{CDCl}_3$ )  $\delta$  4.37 (d,  $J = 8.0$  Hz, 1H), 4.23 (d,  $J = 12.0$  Hz, 1H), 2.94 - 2.86 (m, 1H), 2.11 - 2.05 (m, 1H), 1.97 - 1.79 (m, 3H), 1.74 - 1.68 (m, 1H), 1.60 - 1.24 (m, 5H).

$^{13}\text{C NMR}$  (101 MHz,  $\text{CDCl}_3$ )  $\delta$  57.3, 41.6, 26.6, 25.4, 25.1, 23.9.

**ESI MS.**  $\text{C}_7\text{H}_{14}\text{BrOS}$   $m/z$   $[\text{M}+\text{H}]^+$  calc. 225.0, found 224.9.

$[\alpha]_D^{25}$  of (*S*)-**4a** -14.99 (c 0.120, EtOH).

$[\alpha]_D^{25}$  of (*R*)-**4a** +13.33 (c 0.090, EtOH).

**Chiral HPLC** Chiralpak AD-H, 10% IPA/hexanes, 1.0 mL/min, 254nm.

### ( $\pm$ )-**4a**

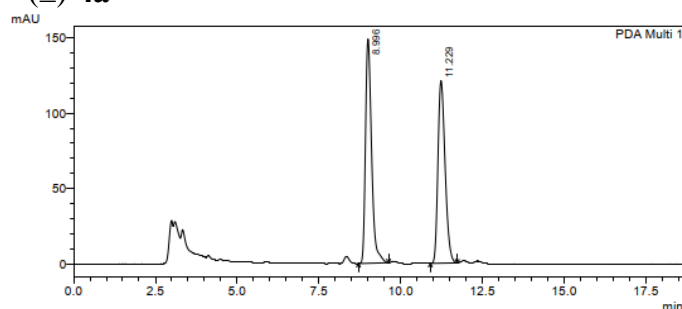

1 PDA Multi 1/254nm 4nm

| PDA Ch1 254nm 4nm |           |         |         | PeakTable |
|-------------------|-----------|---------|---------|-----------|
| Peak#             | Ret. Time | Area    | Area %  |           |
| 1                 | 8.996     | 1945564 | 51.305  |           |
| 2                 | 11.229    | 1846556 | 48.695  |           |
| Total             |           | 3792120 | 100.000 |           |

**(S)-4a**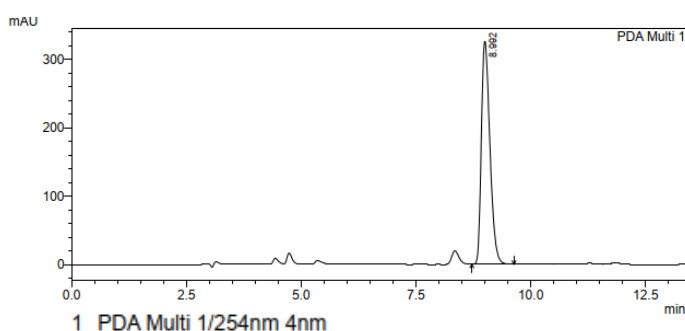

| PDA Ch1 254nm 4nm |           |         |         |
|-------------------|-----------|---------|---------|
| Peak#             | Ret. Time | Area    | Area %  |
| 1                 | 8.992     | 4235841 | 100.000 |
| Total             |           | 4235841 | 100.000 |

**(R)-4a**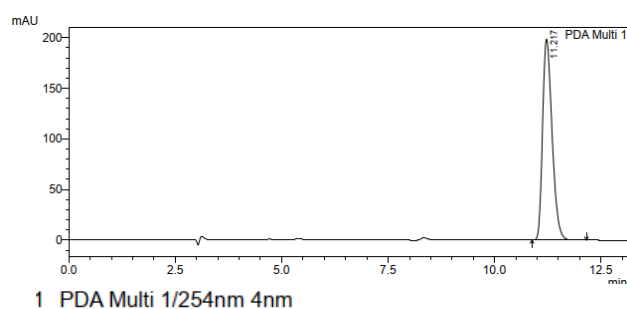

| PDA Ch1 254nm 4nm |           |         |         |
|-------------------|-----------|---------|---------|
| Peak#             | Ret. Time | Area    | Area %  |
| 1                 | 11.217    | 3088258 | 100.000 |
| Total             |           | 3088258 | 100.000 |

**(S)-1-((Bromomethyl)sulfinyl)hexane 4b**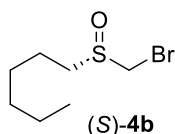

**Yield:** 70%. Purified by ISCO flash column chromatography (4:1 hexane:EtOAc v/v).

**<sup>1</sup>H NMR** (400 MHz, CDCl<sub>3</sub>) δ 4.30 (d, *J* = 12.0 Hz, 1H), 4.22 (d, *J* = 12.0 Hz, 1H), 2.91 - 2.79 (m, 2H), 1.79 - 1.71 (m, 2H), 1.54 - 1.40 (m, 2H), 1.36 - 1.27 (m, 4H), 0.89 (t, *J* = 8.0 Hz, 3H).

**<sup>13</sup>C NMR** (101 MHz, CDCl<sub>3</sub>) δ 51.2, 43.6, 31.4, 28.5, 22.5, 22.1, 14.1.

**ESI MS.** C<sub>7</sub>H<sub>16</sub>BrOS *m/z* [M+H]<sup>+</sup> calc. 227.0, found 227.0.

**[α]<sub>D</sub><sup>25</sup>** -49.13 (c 0.175, EtOH).

**Chiral HPLC** Chiralpak AD-H, 10% IPA/hexanes, 1.0 mL/min, 254nm.

**(±)-4b**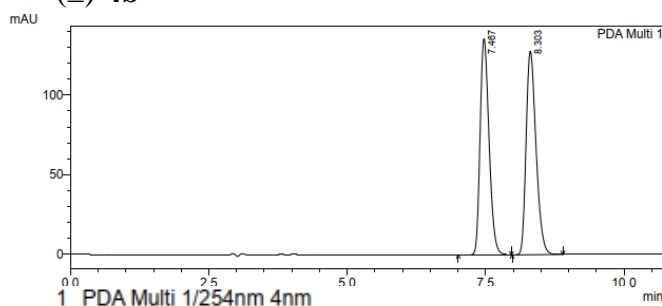

| PDA Ch1 254nm 4nm |           |         |         |
|-------------------|-----------|---------|---------|
| Peak#             | Ret. Time | Area    | Area %  |
| 1                 | 7.467     | 1527007 | 48.935  |
| 2                 | 8.303     | 1593483 | 51.065  |
| Total             |           | 3120490 | 100.000 |

**(S)-4b**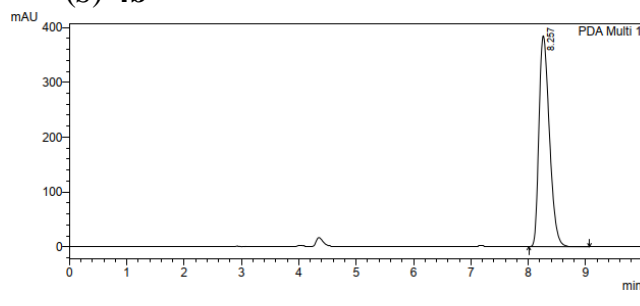

| PDA Ch1 254nm 4nm |           |         |         |
|-------------------|-----------|---------|---------|
| Peak#             | Ret. Time | Area    | Area %  |
| 1                 | 8.257     | 4865590 | 100.000 |
| Total             |           | 4865590 | 100.000 |

**(S)- ((Bromomethyl)sulfinyl)benzene 4c**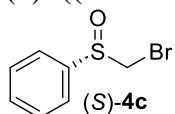

**Yield:** 87%. Purified by ISCO flash column chromatography (6:1 hexane:EtOAc v/v).

**<sup>1</sup>H NMR** (400 MHz, CDCl<sub>3</sub>) δ 7.71 - 7.68 (m, 2H), 7.58 - 7.54 (m, 3H), 4.35 (d, *J* = 12.0 Hz,

1H), 4.25 (d,  $J = 8.0$  Hz, 1H).

$^{13}\text{C}$  NMR (151 MHz,  $\text{CDCl}_3$ )  $\delta$  141.7, 132.3, 129.4, 124.9, 124.7, 48.9.

ESI MS.  $\text{C}_7\text{H}_8\text{BrOS}$   $m/z$   $[\text{M}+\text{H}]^+$  calc. 218.9, found 218.9.

$[\alpha]^{25}_{\text{D}}$  +205.33 (c 0.26, EtOH).

Chiral HPLC Chiralcel OD-H, 10% IPA/hexanes, 1.0 mL/min, 254nm.

(±)-4c

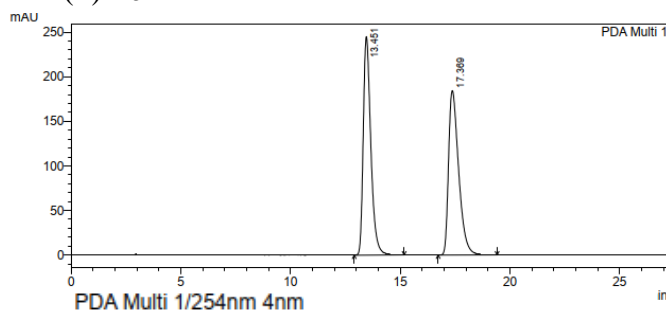

PeakTable

| Peak# | Ret. Time | Area     | Area %  |
|-------|-----------|----------|---------|
| 1     | 13.451    | 5879298  | 49.921  |
| 2     | 17.369    | 5897841  | 50.079  |
| Total |           | 11777139 | 100.000 |

(S)-4c

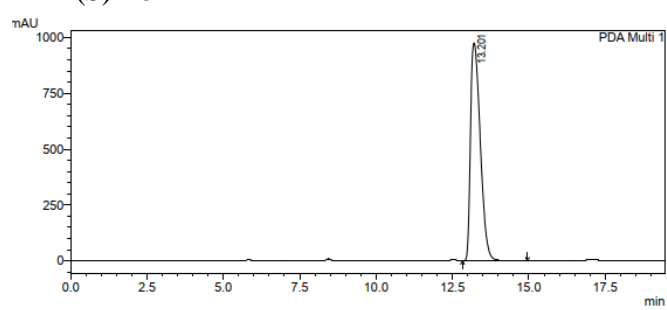

PeakTable

| Peak# | Ret. Time | Area     | Area %  |
|-------|-----------|----------|---------|
| 1     | 13.201    | 21744266 | 100.000 |
| Total |           | 21744266 | 100.000 |

### (S)-1-((Bromomethyl)sulfinyl)-4-methoxybenzene 4d

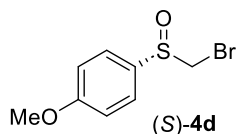

Yield: 89%. Purified by ISCO flash column chromatography (4:1 hexane:EtOAc v/v).

$^1\text{H}$  NMR (600 MHz,  $\text{CDCl}_3$ )  $\delta$  7.64 - 7.61 (m, 2H), 7.05 - 7.03 (m, 2H), 4.27 (d,  $J = 12.0$  Hz, 1H), 4.23 (d,  $J = 12.0$  Hz, 1H), 3.86 (s, 3H).

$^{13}\text{C}$  NMR (151 MHz,  $\text{CDCl}_3$ )  $\delta$  162.9, 132.4, 126.9, 114.9, 55.7, 48.9.

ESI MS.  $\text{C}_8\text{H}_{10}\text{BrO}_2\text{S}$   $m/z$   $[\text{M}+\text{H}]^+$  calc. 248.9, found 249.0

$[\alpha]^{25}_{\text{D}}$  +173.67 (c 0.175, EtOH).

Chiral HPLC Chiralpak AD-H, 10% IPA/hexanes, 1.0 mL/min, 254nm.

(±)-4d

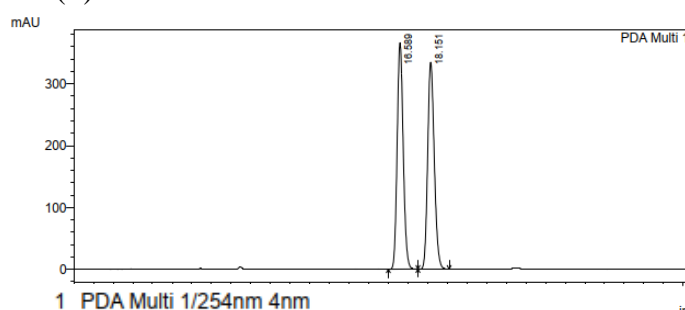

PeakTable

| Peak# | Ret. Time | Area     | Area %  |
|-------|-----------|----------|---------|
| 1     | 16.589    | 7837909  | 50.142  |
| 2     | 18.151    | 7793434  | 49.858  |
| Total |           | 15631343 | 100.000 |

(S)-4d

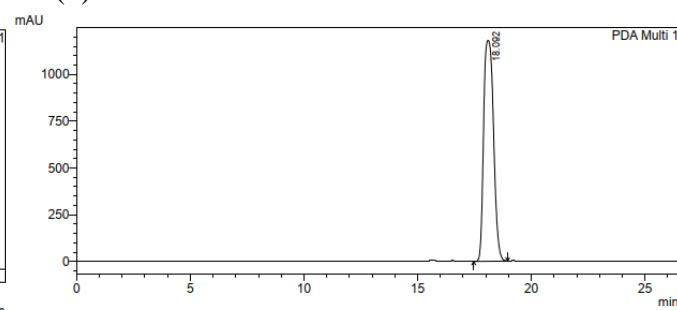

PeakTable

| Peak# | Ret. Time | Area     | Area %  |
|-------|-----------|----------|---------|
| 1     | 18.092    | 35637477 | 100.000 |
| Total |           | 35637477 | 100.000 |

**(S)-1-((Bromomethyl)sulfinyl)-4-methylbenzene 4e**

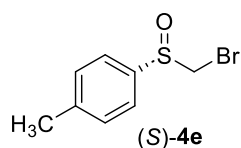

**Yield:** 83%. Purified by ISCO flash column chromatography (6:1 hexane:EtOAc v/v).

**<sup>1</sup>H NMR** (400 MHz, CDCl<sub>3</sub>) δ 7.60 - 7.57 (m, 2H), 7.37 - 7.35 (m, 2H), 4.31 (d, *J* = 12.0 Hz, 1H), 4.23 (d, *J* = 12.0 Hz, 1H), 2.43 (s, 3H).

**<sup>13</sup>C NMR** (101 MHz, CDCl<sub>3</sub>) δ 143.0, 138.5, 130.1, 124.9, 48.9, 21.6.

**ESI MS.** C<sub>8</sub>H<sub>10</sub>BrOS *m/z* [M+H]<sup>+</sup> calc. 232.9, found 233.0.

**[α]<sup>26</sup><sub>D</sub>** +209.55 (c 0.125, EtOH).

**Chiral HPLC** Chiralpak AD-H, 10% IPA/hexanes, 1.0 mL/min, 254nm

(±)-4e

(S)-4e

mAU 1 PDA Multi 1/254nm 4nm

1 PDA Multi 1/254nm 4nm

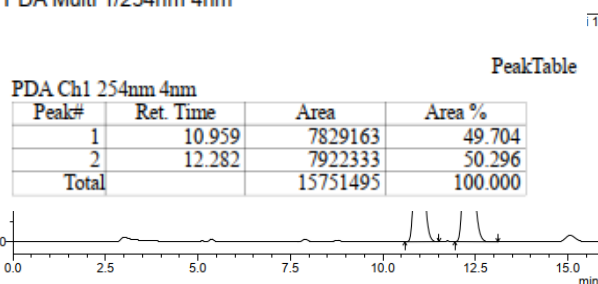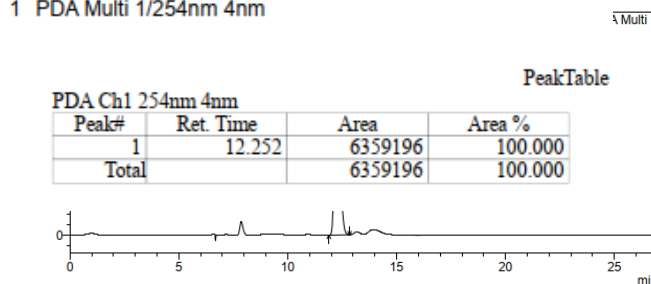

**(S)-1-((bromomethyl)sulfinyl)-4-(trifluoromethyl)benzene 4f**

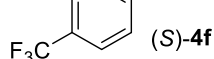

**Yield:** 68%. Purified by ISCO flash column chromatography (6:1 hexane:EtOAc v/v).

**<sup>1</sup>H NMR** (400 MHz, CDCl<sub>3</sub>) δ 7.83 (s, 4H), 4.39 (d, *J* = 8.0 Hz, 1H), 4.28 (d, *J* = 8.0 Hz, 1H).

**<sup>13</sup>C NMR** (151 MHz, CDCl<sub>3</sub>) δ 145.9, 134.0 (q), 126.4 (q), 125.6, 122.6 (q), 48.5.

**ESI MS.** C<sub>8</sub>H<sub>7</sub>BrF<sub>3</sub>OS *m/z* [M+H]<sup>+</sup> calc. 286.9, found 286.9.

**[α]<sup>25</sup><sub>D</sub>** +162.36 (c 0.25, EtOH).

**Chiral HPLC** Chiralpak AD-H, 10% IPA/hexanes, 1.0 mL/min, 254nm

(±)-4f

(S)-4f

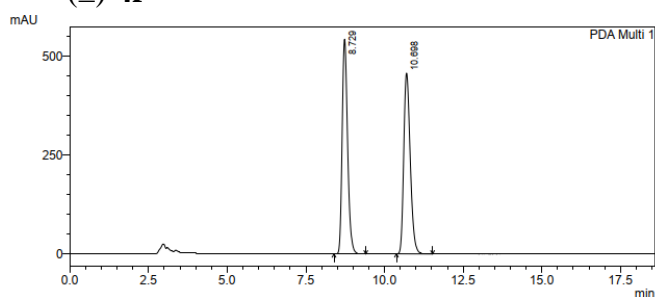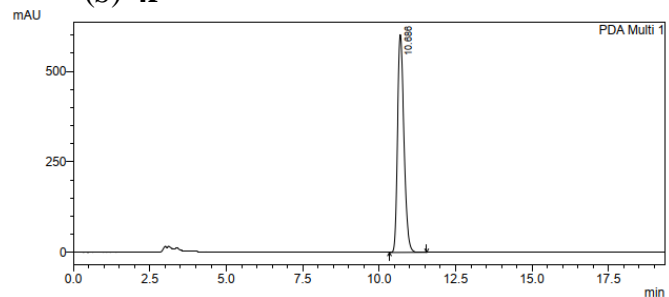

| PDA Ch1 254nm 4nm |           |          |         |
|-------------------|-----------|----------|---------|
| Peak#             | Ret. Time | Area     | Area %  |
| 1                 | 8.729     | 6532604  | 49.771  |
| 2                 | 10.698    | 6592766  | 50.229  |
| Total             |           | 13125370 | 100.000 |

| PDA Ch1 254nm 4nm |           |         |         |
|-------------------|-----------|---------|---------|
| Peak#             | Ret. Time | Area    | Area %  |
| 1                 | 10.686    | 8751498 | 100.000 |
| Total             |           | 8751498 | 100.000 |



### (S)-1-((bromomethyl)sulfinyl)-4-chlorobenzene 4g

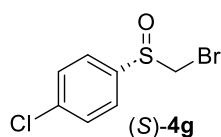

**Yield:** 71%. Purified by combi flash column chromatography (4:1 hexane:EtOAc v/v).

**<sup>1</sup>H NMR** (600 MHz, CDCl<sub>3</sub>) δ 7.66 - 7.64 (m, 2H), 7.55 - 7.53 (m, 2H), 4.33 (d, *J* = 12.0 Hz, 1H), 4.25 (d, *J* = 12.0 Hz, 1H).

**<sup>13</sup>C NMR** (151 MHz, CDCl<sub>3</sub>) δ 140.1, 138.7, 129.8, 126.5, 126.4, 48.7.

**ESI MS.** C<sub>7</sub>H<sub>7</sub>BrClOS m/z [M+H]<sup>+</sup> calc. 252.9, found 252.9.

**[α]<sup>25</sup><sub>D</sub>** +191.96 (c 0.25, EtOH).

**Chiral HPLC** Chiralpak AD-H, 5% IPA/hexanes, 1.0 mL/min, 254nm.

(±)-4g

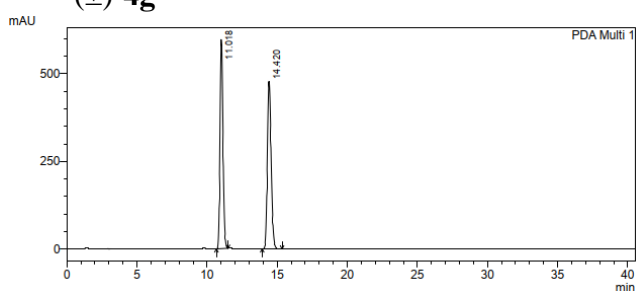

1 PDA Multi 1/254nm 4nm

PeakTable

PDA Ch1 254nm 4nm

| Peak# | Ret. Time | Area     | Area %  |
|-------|-----------|----------|---------|
| 1     | 11.018    | 8973331  | 49.463  |
| 2     | 14.420    | 9168173  | 50.537  |
| Total |           | 18141504 | 100.000 |

(S)-4g

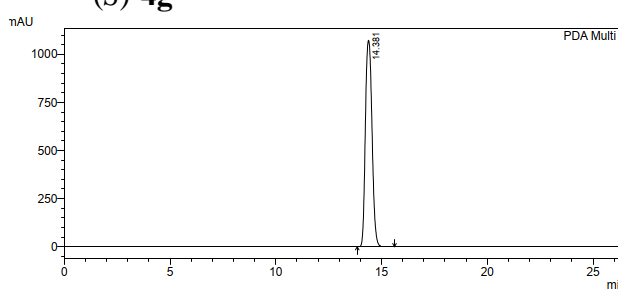

1 PDA Multi 1/254nm 4nm

PeakTable

PDA Ch1 254nm 4nm

| Peak# | Ret. Time | Area     | Area %  |
|-------|-----------|----------|---------|
| 1     | 14.381    | 23311559 | 100.000 |
| Total |           | 23311559 | 100.000 |

### tert-Butyl (S)-2-((bromomethyl)sulfinyl)acetate 4h

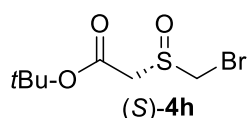

**Yield:** 48%. Purified by ISCO flash column chromatography (4:1 hexane:EtOAc v/v).

**<sup>1</sup>H NMR** (400 MHz, CDCl<sub>3</sub>) δ 4.59 (d, *J* = 12.0 Hz, 1H), 4.45 (d, *J* = 12.0 Hz, 1H), 3.92 (d, *J* = 12.0 Hz, 1H), 3.67 (d, *J* = 16.0 Hz, 1H), 1.50 (s, 9H).

**<sup>13</sup>C NMR** (101 MHz, CDCl<sub>3</sub>) δ 163.9, 84.2, 55.2, 44.7, 28.1.

**ESI MS.** C<sub>7</sub>H<sub>13</sub>BrO<sub>3</sub>SNa m/z [M+Na]<sup>+</sup> calc. 278.9, found 279.0

**[α]<sup>25</sup><sub>D</sub>** -17.59 (c 0.125, EtOH).

**Chiral HPLC** Chiralpak AD-H, 10% IPA/hexanes, 1.0 mL/min, 229nm.

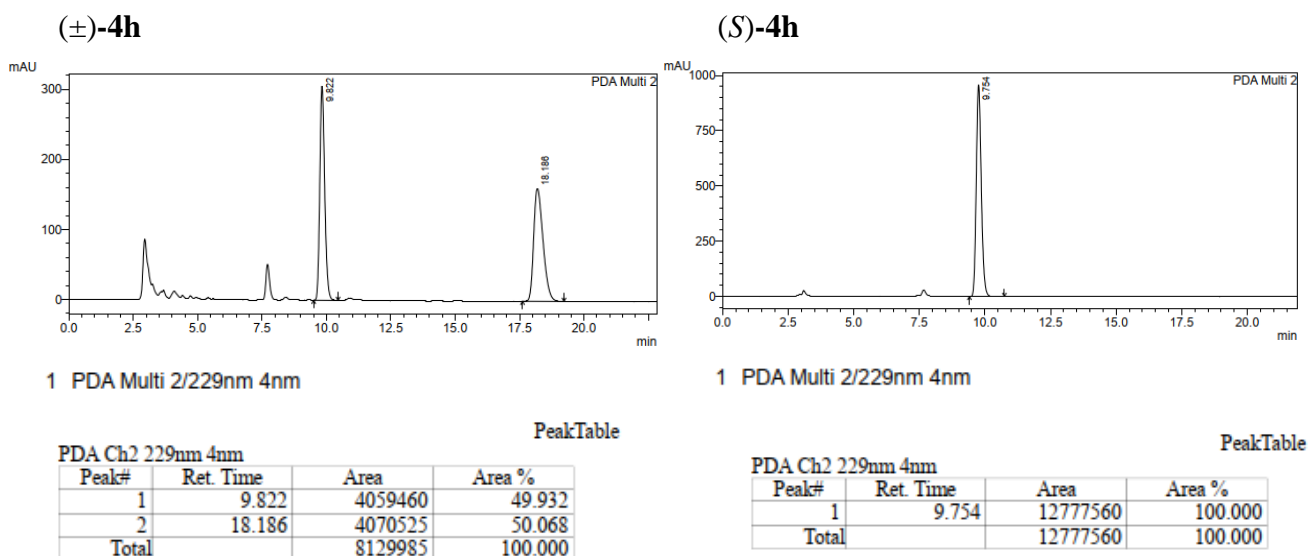

## IX. General procedure for Barton decarboxylative iodination

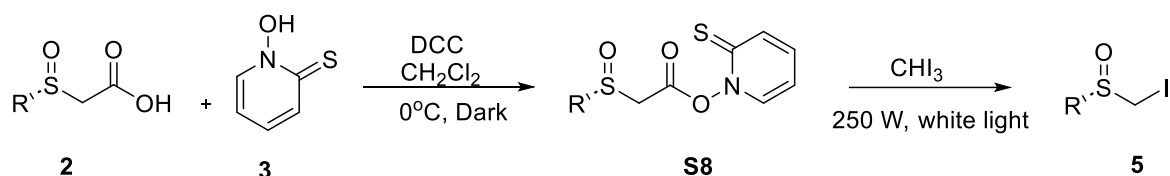

To an ice cold solution of sulfoxide acetic acid **2** (0.2 mmol, 1.0 equiv) in dry, degassed  $\text{CH}_2\text{Cl}_2$  (3 mL) was added N-hydroxypyridine-2-thione **3** (30 mg, 0.24 mmol, 1.2 equiv). After stirring for 5 min. DCC (49 mg, 0.24 mmol, 1.2 equiv) in  $\text{CH}_2\text{Cl}_2$  (1 mL) was added and stirred for 30 min. at rt. Then added  $\text{CHI}_3$  (157 mg, 0.4 mmol, 2.0 equiv) and then ice cold solution was irradiated with a 250 W tungsten lamp under an inert atmosphere until the disappearance of the starting material as monitored by LCMS. Filtration of the solution through celite, concentration and ISCO flash chromatography gave the desired compound **5**.

### (S)-((Iodomethyl)sulfinyl)cyclohexane **5a**

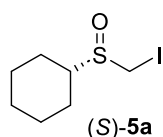

**Yield:** 51%. Purified by ISCO flash column chromatography (6:1 hexane:EtOAc v/v).

**$^1\text{H NMR}$**  (400 MHz,  $\text{CDCl}_3$ )  $\delta$  4.28 (d,  $J = 8.0$  Hz, 1H), 4.16 (d,  $J = 8.0$  Hz, 1H), 2.75 - 2.65 (m, 1H), 2.15 - 2.08 (m, 1H), 1.97 - 1.81 (m, 3H), 1.75 - 1.68 (m, 1H), 1.64 - 1.54 (m, 1H), 1.43 - 1.22 (m, 4H).

**$^{13}\text{C NMR}$**  (101 MHz,  $\text{CDCl}_3$ )  $\delta$  60.0, 26.6, 25.4, 25.3, 25.1, 24.1, 18.0.

**ESI MS.**  $\text{C}_7\text{H}_{14}\text{IOS}$   $m/z$   $[\text{M}+\text{H}]^+$  calc. 273.0, found 273.0.

**$[\alpha]^{25}_{\text{D}}$**  -2.66 (c 0.075, EtOH).

**Chiral HPLC** Chiralpak AD-H, 5% IPA/hexanes, 1.0 mL/min, 254nm.

**(±)-5a**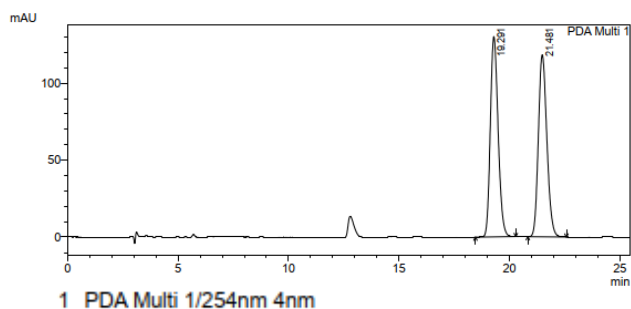

PeakTable

| PDA Ch1 254nm 4nm |           |         |         |
|-------------------|-----------|---------|---------|
| Peak#             | Ret. Time | Area    | Area %  |
| 1                 | 19.291    | 3183483 | 50.160  |
| 2                 | 21.481    | 3163167 | 49.840  |
| Total             |           | 6346650 | 100.000 |

**(S)-5a**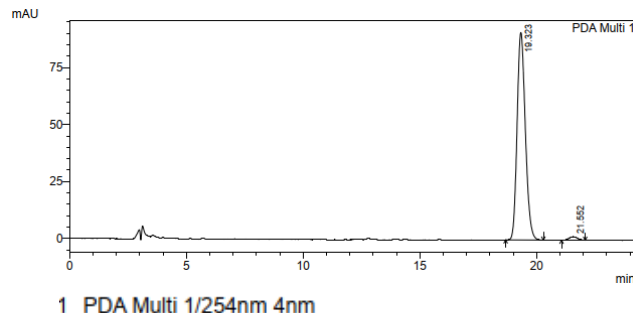

PeakTable

| PDA Ch1 254nm 4nm |           |         |         |
|-------------------|-----------|---------|---------|
| Peak#             | Ret. Time | Area    | Area %  |
| 1                 | 19.323    | 2234145 | 98.205  |
| 2                 | 21.552    | 40844   | 1.795   |
| Total             |           | 2274989 | 100.000 |

**(S)-1-((Iodomethyl)sulfinyl)hexane 5b**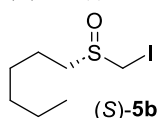

**Yield:** 58%. Purified by ISCO flash column chromatography (6:1 hexane:EtOAc v/v).

**<sup>1</sup>H NMR** (400 MHz, CDCl<sub>3</sub>) δ 4.25 (d, *J* = 12.0 Hz, 1H), 4.14 (d, *J* = 12.0 Hz, 1H), 2.84 - 2.71 (m, 2H), 1.77 - 1.69 (m, 2H), 1.53 - 1.28 (m, 6H), 0.90 (t, *J* = 8.0 Hz, 3H).

**<sup>13</sup>C NMR** (101 MHz, CDCl<sub>3</sub>) δ 53.6, 31.4, 28.6, 22.5, 22.3, 19.7, 14.1.

**ESI MS.** C<sub>7</sub>H<sub>16</sub>IOS m/z [M+H]<sup>+</sup> calc. 275.0, found 275.0.

**[α]<sup>25</sup><sub>D</sub>** -40.79 (c 0.25, EtOH).

**Chiral HPLC** Chiralpak AD-H, 10% IPA/hexanes, 1.0 mL/min, 254nm.

**(±)-5b**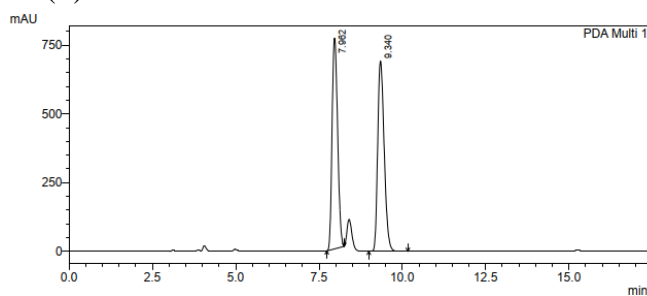

1 PDA Multi 1/254nm 4nm

PeakTable

| PDA Ch1 254nm 4nm |           |          |         |
|-------------------|-----------|----------|---------|
| Peak#             | Ret. Time | Area     | Area %  |
| 1                 | 7.962     | 8851524  | 48.585  |
| 2                 | 9.340     | 9367014  | 51.415  |
| Total             |           | 18218537 | 100.000 |

**(S)-5b**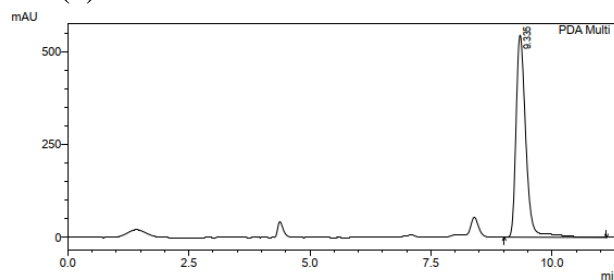

1 PDA Multi 1/254nm 4nm

PeakTable

| PDA Ch1 254nm 4nm |           |         |         |
|-------------------|-----------|---------|---------|
| Peak#             | Ret. Time | Area    | Area %  |
| 1                 | 9.335     | 7645389 | 100.000 |
| Total             |           | 7645389 | 100.000 |

**(S)-((Iodomethyl)sulfinyl)benzene 5c**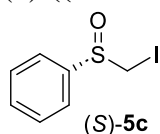

**Yield:** 61%. Purified by ISCO flash column chromatography (6:1 hexane:EtOAc v/v).

**<sup>1</sup>H NMR** (400 MHz, CDCl<sub>3</sub>) δ 7.67 - 7.64 (m, 2H), 7.58 - 7.52 (m, 3H), 4.40 (d, *J* = 12.0 Hz, 1H), 4.16 (d, *J* = 12.0 Hz, 1H).

**<sup>13</sup>C NMR** (151 MHz, CDCl<sub>3</sub>) δ 142.9, 132.1, 129.4, 124.8, 25.6.

**ESI MS.** C<sub>7</sub>H<sub>8</sub>IOS m/z [M+H]<sup>+</sup> calc. 266.9, found 266.9.

[α]<sup>25</sup><sub>D</sub> +181.56 (c 0.25, EtOH).

**Chiral HPLC** Chiralcel OD-H, 10% IPA/hexanes, 1.0 mL/min, 254nm

(±)-5c

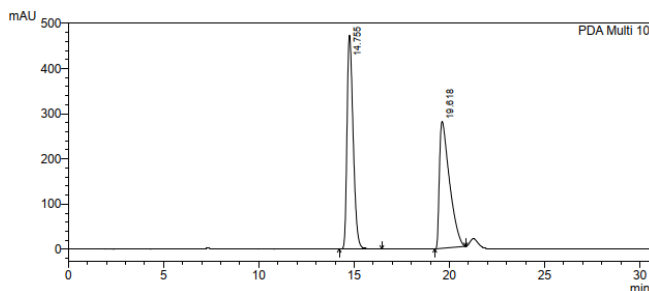

1 PDA Multi 10/254nm 4nm

PDA Ch10 254nm 4nm

| Peak# | Ret. Time | Area     | Area %  |
|-------|-----------|----------|---------|
| 1     | 14.755    | 10566037 | 50.520  |
| 2     | 19.618    | 10348517 | 49.480  |
| Total |           | 20914554 | 100.000 |

PeakTable

(S)-5c

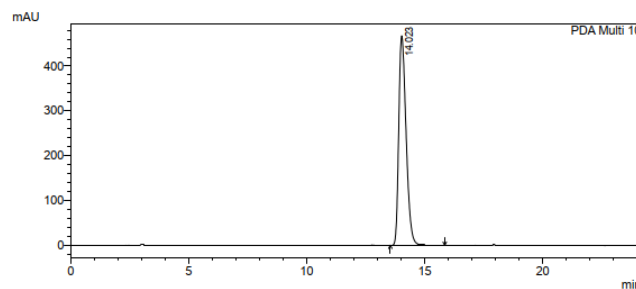

1 PDA Multi 10/254nm 4nm

PDA Ch10 254nm 4nm

| Peak# | Ret. Time | Area     | Area %  |
|-------|-----------|----------|---------|
| 1     | 14.023    | 10121318 | 100.000 |
| Total |           | 10121318 | 100.000 |

PeakTable

(S)-1-(Iodomethyl)sulfinyl)-4-methoxybenzene 5d

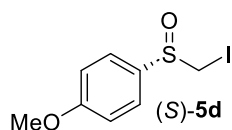

**Yield:** 65%. Purified by ISCO flash column chromatography (4:1 hexane:EtOAc v/v).

**<sup>1</sup>H NMR** (400 MHz, CDCl<sub>3</sub>) δ 7.59 - 7.56 (m, 2H), 7.03 - 7.00 (m, 2H), 4.33 (d, *J* = 8.0 Hz, 1H), 4.13 (d, *J* = 12.0 Hz, 1H), 3.85 (s, 3H).

**<sup>13</sup>C NMR** (101 MHz, CDCl<sub>3</sub>) δ 162.8, 133.6, 126.7, 114.8, 55.7, 25.7.

**ESI MS.** C<sub>8</sub>H<sub>10</sub>IO<sub>2</sub>S m/z [M+H]<sup>+</sup> calc. 280.9, found 281.0.

[α]<sup>25</sup><sub>D</sub> +88.77 (c 0.25, EtOH).

**Chiral HPLC** Chiralpak AD-H, 10% IPA/hexanes, 1.0 mL/min, 254nm.

(±)-5d

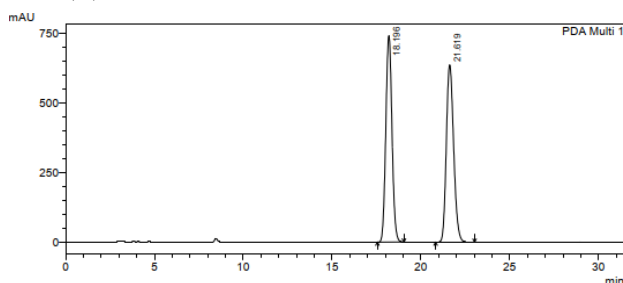

1 PDA Multi 1/254nm 4nm

PDA Ch1 254nm 4nm

| Peak# | Ret. Time | Area     | Area %  |
|-------|-----------|----------|---------|
| 1     | 18.196    | 17936416 | 49.592  |
| 2     | 21.619    | 18231859 | 50.408  |
| Total |           | 36168276 | 100.000 |

PeakTable

(S)-5d

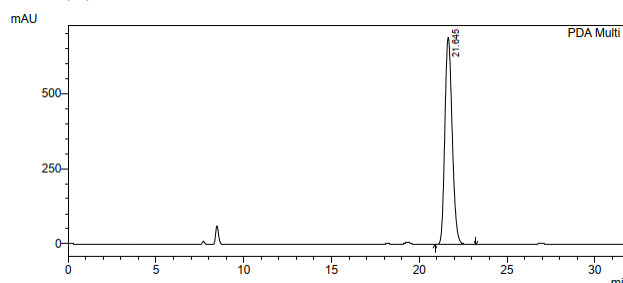

1 PDA Multi 1/254nm 4nm

PDA Ch1 254nm 4nm

| Peak# | Ret. Time | Area     | Area %  |
|-------|-----------|----------|---------|
| 1     | 21.645    | 20060845 | 100.000 |
| Total |           | 20060845 | 100.000 |

PeakTable

### (S)-1-((Iodomethyl)sulfinyl)-4-methylbenzene 5e

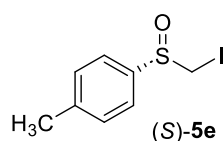

**Yield:** 55%. Purified by ISCO flash column chromatography (6:1 hexane:EtOAc v/v).

**<sup>1</sup>H NMR** (400 MHz, CDCl<sub>3</sub>) δ 7.56 - 7.52 (m, 2H), 7.35 - 7.32 (m, 2H), 4.37 (d, *J* = 12.0 Hz, 1H), 4.15 (d, *J* = 12.0 Hz, 1H), 2.43 (s, 3H).

**<sup>13</sup>C NMR** (101 MHz, CDCl<sub>3</sub>) δ 142.8, 139.6, 130.1, 124.8, 25.7, 21.7.

**ESI MS.** C<sub>8</sub>H<sub>10</sub>IOS m/z [M+H]<sup>+</sup> calc. 232.9, found 233.0.

**[α]<sup>26</sup><sub>D</sub>** +212.80 (c 0.140, EtOH).

**Chiral HPLC** Chiralpak AD-H, 5% IPA/hexanes, 1.0 mL/min, 254nm.

(±)-5e

(S)-5e

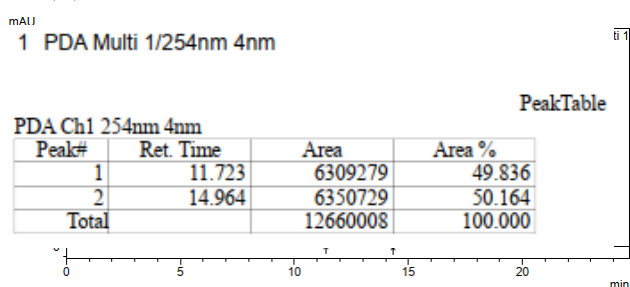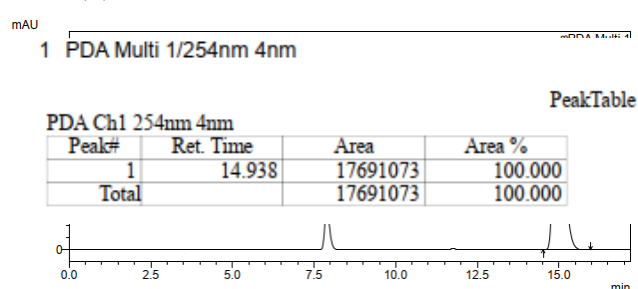

### (S)-1-((Iodomethyl)sulfinyl)-4-(trifluoromethyl)benzene 5f

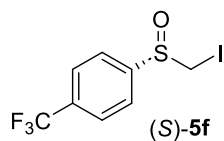

**Yield:** 51%. Purified by ISCO flash column chromatography (6:1 hexane:EtOAc v/v).

**<sup>1</sup>H NMR** (600 MHz, CDCl<sub>3</sub>) δ 7.80 - 7.77 (m, 4H), 4.46 (d, *J* = 12.0 Hz, 1H), 4.19 (d, *J* = 12.0 Hz, 1H).

**<sup>13</sup>C NMR** (151 MHz, CDCl<sub>3</sub>) δ 147.1, 134.1 (q), 126.3 (q), 125.4, 124.4 (q), 25.0.

**ESI MS.** C<sub>8</sub>H<sub>7</sub>IF<sub>3</sub>OS m/z [M+H]<sup>+</sup> calc. 334.9, found 334.9.

**[α]<sup>25</sup><sub>D</sub>** +204.66 (c 0.85, EtOH).

**Chiral HPLC** Chiralpak AD-H, 10% IPA/hexanes, 1.0 mL/min, 254nm.

**(±)-5f**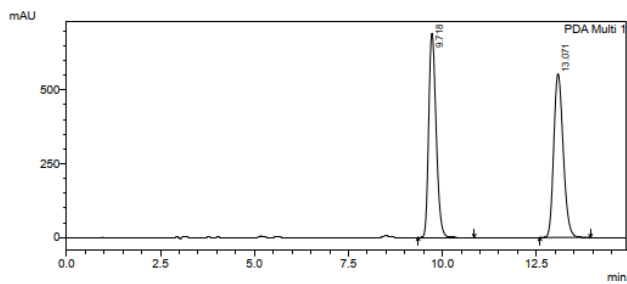

1 PDA Multi 1/254nm 4nm

PeakTable

| PDA Ch1 254nm 4nm |           |          |         |
|-------------------|-----------|----------|---------|
| Peak#             | Ret. Time | Area     | Area %  |
| 1                 | 9.718     | 9491576  | 49.503  |
| 2                 | 13.071    | 9682200  | 50.497  |
| Total             |           | 19173776 | 100.000 |

**(S)-5f**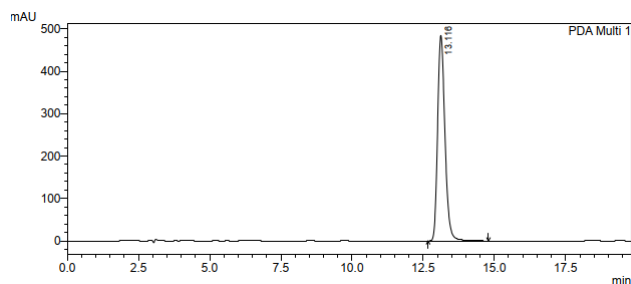

1 PDA Multi 1/254nm 4nm

PeakTable

| PDA Ch1 254nm 4nm |           |         |         |
|-------------------|-----------|---------|---------|
| Peak#             | Ret. Time | Area    | Area %  |
| 1                 | 13.116    | 8722106 | 100.000 |
| Total             |           | 8722106 | 100.000 |

**(S)-1-Chloro-4-((iodomethyl)sulfinyl)benzene 5g**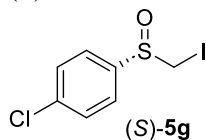

**Yield:** 52%. Purified by ISCO flash column chromatography (4:2 hexane:EtOAc v/v).

**<sup>1</sup>H NMR** (400 MHz, CDCl<sub>3</sub>) δ 7.61 - 7.57 (m, 2H), 7.54 - 7.50 (m, 2H), 4.39 (d, *J* = 8.0 Hz, 1H), 4.15 (d, *J* = 8.0 Hz, 1H).

**<sup>13</sup>C NMR** (101 MHz, CDCl<sub>3</sub>) δ 141.3, 138.5, 129.7, 126.3, 25.3.

**ESI MS.** C<sub>7</sub>H<sub>7</sub>ClIOS *m/z* [M+H]<sup>+</sup> calc. 300.9, found 300.9.

**[α]<sub>D</sub><sup>25</sup>** +191.07 (c 0.18, EtOH).

**Chiral HPLC** Chiralpak AD-H, 5% IPA/hexanes, 1.0 mL/min, 254nm.

**(±)-5g**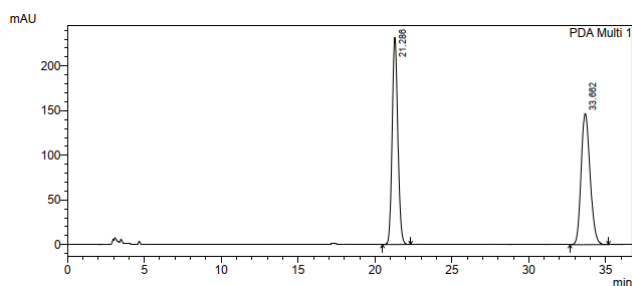

1 PDA Multi 1/254nm 4nm

PeakTable

| PDA Ch1 254nm 4nm |           |          |         |
|-------------------|-----------|----------|---------|
| Peak#             | Ret. Time | Area     | Area %  |
| 1                 | 21.286    | 5964205  | 49.987  |
| 2                 | 33.662    | 5967341  | 50.013  |
| Total             |           | 11931546 | 100.000 |

**(S)-5g**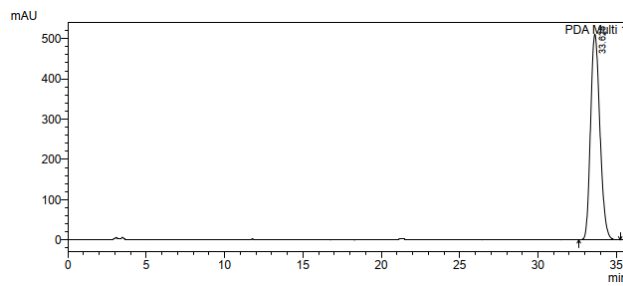

1 PDA Multi 1/254nm 4nm

PeakTable

| PDA Ch1 254nm 4nm |           |          |         |
|-------------------|-----------|----------|---------|
| Peak#             | Ret. Time | Area     | Area %  |
| 1                 | 33.625    | 21229685 | 100.000 |
| Total             |           | 21229685 | 100.000 |

**(S)-tert-Butyl 2-((iodomethyl)sulfinyl)acetate 5h**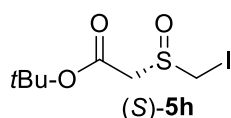

**Yield:** 43%. Purified by ISCO flash column chromatography (4:1 hexane:EtOAc v/v).

**<sup>1</sup>H NMR** (400 MHz, CDCl<sub>3</sub>) δ 4.52 (d, *J* = 8.0 Hz, 1H), 4.41 (d, *J* = 12.0 Hz, 1H), 3.76 (d, *J* = 16.0 Hz, 1H), 3.62 (d, *J* = 16.0 Hz, 1H), 1.49 (s, 9H).

**<sup>13</sup>C NMR** (101 MHz, CDCl<sub>3</sub>) δ 163.9, 84.2, 57.8, 28.1, 21.1.

**ESI MS.** C<sub>7</sub>H<sub>14</sub>IO<sub>3</sub>S *m/z* [M+H]<sup>+</sup> calc. 304.9, found 305.0.

**[α]<sup>25</sup><sub>D</sub>** -27.99 (c 0.1, EtOH).

**Chiral HPLC** Chiralcel OD-H, 10% IPA/hexanes, 1.0 mL/min, 254nm.

(±)-**5h**

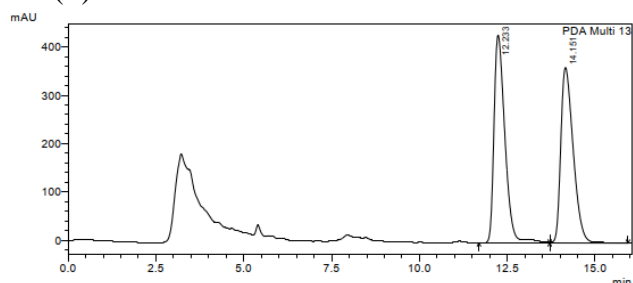

1 PDA Multi 13/254nm 4nm

(*S*)-**5h**

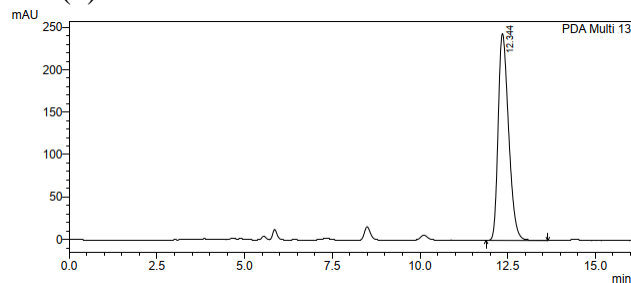

1 PDA Multi 13/254nm 4nm

PeakTable

| PDA Ch13 254nm 4nm |           |          |         |
|--------------------|-----------|----------|---------|
| Peak#              | Ret. Time | Area     | Area %  |
| 1                  | 12.233    | 9312641  | 51.041  |
| 2                  | 14.151    | 8932846  | 48.959  |
| Total              |           | 18245487 | 100.000 |

PeakTable

| PDA Ch13 254nm 4nm |           |         |         |
|--------------------|-----------|---------|---------|
| Peak#              | Ret. Time | Area    | Area %  |
| 1                  | 12.344    | 5052865 | 100.000 |
| Total              |           | 5052865 | 100.000 |

## X. General procedure for decarboxylation of α-Chloro sulfinyl acetate

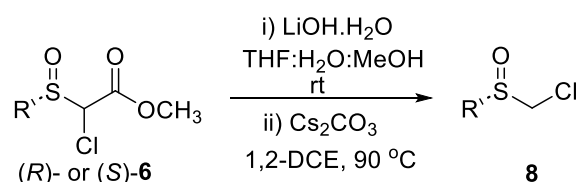

A mixture of methyl ester (0.1 mmol, 1.0 equiv), lithium hydroxide (8.0 mg, 0.2 mmol, 2.0 equiv), THF (0.5 mL), H<sub>2</sub>O (0.25 mL) and CH<sub>3</sub>OH (0.12 mL) was stirred at room temperature. The organic solvent was removed under reduced pressure, and the residue obtained was then acidified to pH 3 with 1 N HCl, and the mixture was extracted with EtOAc (3 × 10 mL). The combined extracts were dried over anhydrous Na<sub>2</sub>SO<sub>4</sub>, filtered, and concentrated under reduced pressure to give the crude acid which was used for the next step without further purification.

To a stirred solution of the above acid in DCE (1 mL) was added solid Cs<sub>2</sub>CO<sub>3</sub> (98 mg, 0.3 mmol, 3.0 equiv). The suspension was stirred for 4-12 h at 90 °C, and the reaction was quenched by addition of water. The aqueous layer was extracted with EtOAc (3 × 10 mL), and the combined organic layer was dried over anhydrous Na<sub>2</sub>SO<sub>4</sub>, evaporated under vacuum and purified by ISCO flash chromatography to give the desired product **8**.

### (*S*)-1-((Chloromethyl)sulfinyl)hexane **8b**

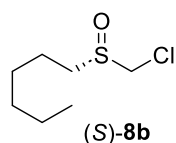

**Yield:** 65%. Purified by ISCO flash column chromatography (3:2 hexane:EtOAc v/v).

**<sup>1</sup>H NMR** (600 MHz, CDCl<sub>3</sub>) δ 4.41 (d, *J* = 12.0 Hz, 1H), 4.36 (d, *J* = 12.0 Hz, 1H), 2.90 - 2.82 (m, 2H), 1.83 - 1.74 (m, 2H), 1.53 - 1.43 (m, 2H), 1.36 - 1.29 (m, 4H), 0.90 (t, *J* = 6.0 Hz, 3H).  
**<sup>13</sup>C NMR** (151 MHz, CDCl<sub>3</sub>) δ 55.9, 50.2, 31.4, 28.6, 22.5, 22.1, 14.1.

**ESI MS.** C<sub>7</sub>H<sub>16</sub>ClOS *m/z* [M+H]<sup>+</sup> calc. 183.0, found 183.1.

**[α]<sup>25</sup><sub>D</sub>** -59.18 (c 0.125, EtOH).

**Chiral HPLC** Chiralpak IC, 10% IPA/hexanes, 1.0 mL/min, 254nm.

(±)-**8b**

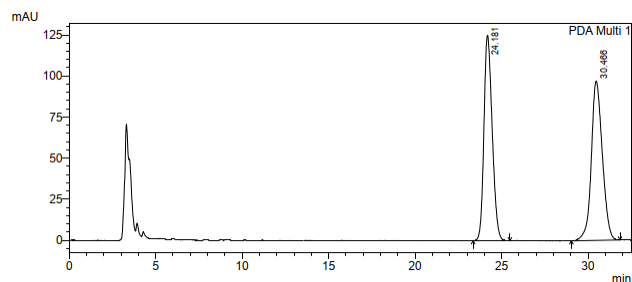

1 PDA Multi 1/220nm 4nm

PeakTable

| PDA Ch1 220nm 4nm |           |         |         |
|-------------------|-----------|---------|---------|
| Peak#             | Ret. Time | Area    | Area %  |
| 1                 | 24.181    | 4153011 | 49.104  |
| 2                 | 30.466    | 4304580 | 50.896  |
| Total             |           | 8457591 | 100.000 |

(*S*)-**8b**

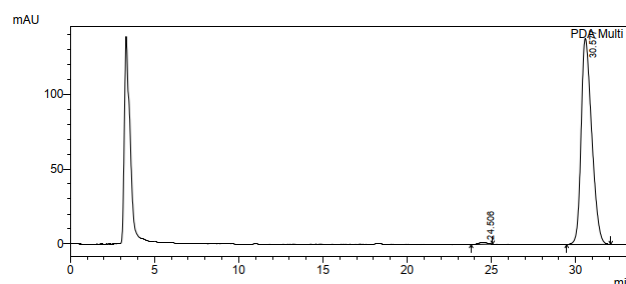

1 PDA Multi 1/220nm 4nm

PeakTable

| PDA Ch1 220nm 4nm |           |         |         |
|-------------------|-----------|---------|---------|
| Peak#             | Ret. Time | Area    | Area %  |
| 1                 | 24.506    | 44650   | 0.737   |
| 2                 | 30.577    | 6009857 | 99.263  |
| Total             |           | 6054507 | 100.000 |

(*S*)-((Chloromethyl)sulfinyl)benzene **8c**

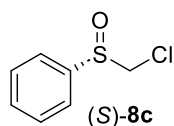

**Yield:** 81%. Purified by ISCO flash column chromatography (3:2 hexane:EtOAc v/v).

**<sup>1</sup>H NMR** (400 MHz, CDCl<sub>3</sub>) δ 7.73 - 7.68 (m, 2H), 7.59 - 7.54 (m, 3H), 4.41 (d, *J* = 8.0 Hz, 1H), 4.37 (d, *J* = 12.0 Hz, 1H).

**<sup>13</sup>C NMR** (101 MHz, CDCl<sub>3</sub>) δ 141.1, 132.3, 129.5, 124.9, 61.4.

**ESI MS.** C<sub>7</sub>H<sub>8</sub>ClOS *m/z* [M+H]<sup>+</sup> calc. 175.0, found 175.0.

**[α]<sup>25</sup><sub>D</sub>** of (*S*)-**8c** +262.34 (c 0.125, EtOH).

**[α]<sup>25</sup><sub>D</sub>** of (*R*)-**8c** -221.69 (c 0.230, EtOH).

**Chiral HPLC** Chiralcel OD-H, 10% IPA/hexanes, 1.0 mL/min, 254nm.

(±)-**8c**

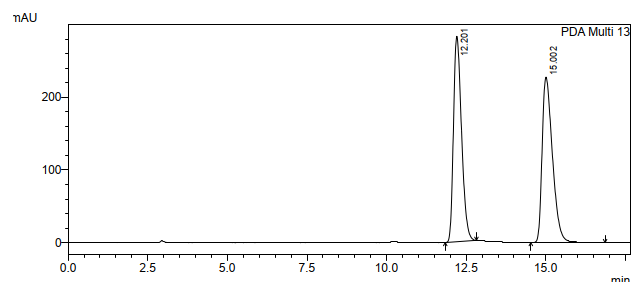

1 PDA Multi 13/254nm 4nm

PeakTable

| PDA Ch13 254nm 4nm |           |          |         |
|--------------------|-----------|----------|---------|
| Peak#              | Ret. Time | Area     | Area %  |
| 1                  | 12.201    | 4976318  | 49.254  |
| 2                  | 15.002    | 5127045  | 50.746  |
| Total              |           | 10103362 | 100.000 |



**(S)-8c**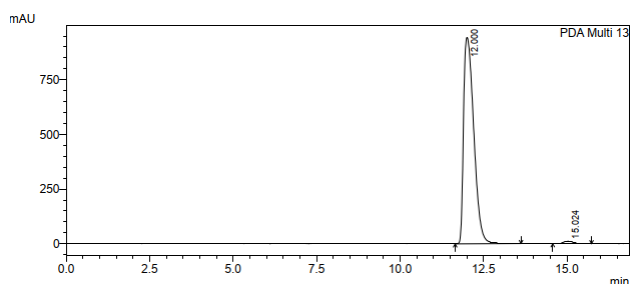

1 PDA Multi 13/254nm 4nm

**(R)-8c**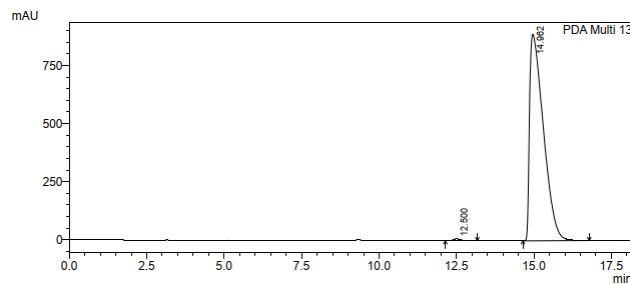

1 PDA Multi 13/254nm 4nm

PeakTable

| PDA Ch13 254nm 4nm |           |          |         |
|--------------------|-----------|----------|---------|
| Peak#              | Ret. Time | Area     | Area %  |
| 1                  | 12.000    | 20087544 | 98.752  |
| 2                  | 15.024    | 253938   | 1.248   |
| Total              |           | 20341481 | 100.000 |

PeakTable

| PDA Ch13 254nm 4nm |           |          |         |
|--------------------|-----------|----------|---------|
| Peak#              | Ret. Time | Area     | Area %  |
| 1                  | 12.500    | 135060   | 0.488   |
| 2                  | 14.962    | 27533844 | 99.512  |
| Total              |           | 27668904 | 100.000 |

**(S)-1-((Chloromethyl)sulfinyl)-4-methoxybenzene 8d**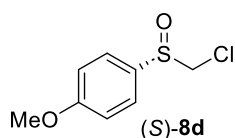

**Yield:** 80%. Purified by ISCO flash column chromatography (1:1 hexane:EtOAc v/v).

**<sup>1</sup>H NMR** (400 MHz, CDCl<sub>3</sub>) δ 7.66 - 7.61 (m, 2H), 7.07 - 7.02 (m, 2H), 4.37 (d, *J* = 8.0 Hz, 1H), 4.32 (d, *J* = 8.0 Hz, 1H), 3.86 (s, 3H).

**<sup>13</sup>C NMR** (101 MHz, CDCl<sub>3</sub>) δ 162.9, 131.8, 126.9, 115.0, 61.2, 55.7.

**ESI MS.** C<sub>8</sub>H<sub>10</sub>ClO<sub>2</sub>S m/z [M+H]<sup>+</sup> calc. 205.0, found 205.1

**[α]<sub>D</sub><sup>24.7</sup>** +217.73 (c 0.45, EtOH).

**Chiral HPLC** Chiralpak AD-H, 10% IPA/hexanes, 1.0 mL/min, 254nm.

**(±)-8d**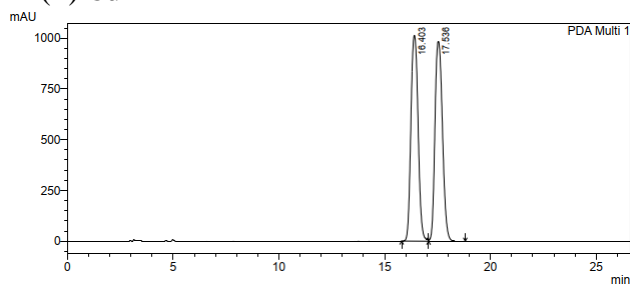

1 PDA Multi 1/254nm 4nm

**(S)-8d**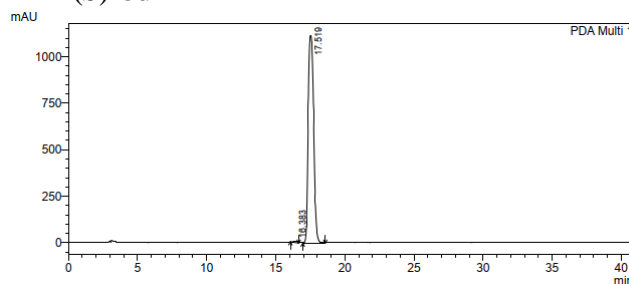

1 PDA Multi 1/254nm 4nm

PeakTable

| PDA Ch1 254nm 4nm |           |          |         |
|-------------------|-----------|----------|---------|
| Peak#             | Ret. Time | Area     | Area %  |
| 1                 | 16.403    | 23973795 | 49.694  |
| 2                 | 17.536    | 24268889 | 50.306  |
| Total             |           | 48242684 | 100.000 |

PeakTable

| PDA Ch1 254nm 4nm |           |          |         |
|-------------------|-----------|----------|---------|
| Peak#             | Ret. Time | Area     | Area %  |
| 1                 | 16.383    | 139501   | 0.453   |
| 2                 | 17.519    | 30658816 | 99.547  |
| Total             |           | 30798317 | 100.000 |

**(S)-1-((Chloromethyl)sulfinyl)-4-methylbenzene 8e**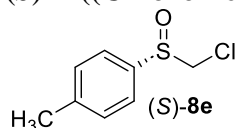

**Yield:** 73%. Purified by ISCO flash column chromatography (3:2 hexane:EtOAc v/v).

**<sup>1</sup>H NMR** (400 MHz, CDCl<sub>3</sub>) δ 7.59 - 7.56 (m, 2H), 7.41 - 7.32 (m, 2H), 4.36 (s, 2H), 2.43 (s, 3H).

**<sup>13</sup>C NMR** (101 MHz, CDCl<sub>3</sub>) δ 142.9, 137.8, 130.2, 124.9, 61.4, 21.6.

**ESI MS.** C<sub>8</sub>H<sub>10</sub>ClOS m/z [M+H]<sup>+</sup> calc. 189.0, found 189.1.

**[α]<sub>D</sub><sup>26</sup>** +238.34 (c 0.25, EtOH).

**Chiral HPLC** Chiralpak IC, 20% IPA/hexanes, 1.0 mL/min, 254nm.

(±)-**8e**

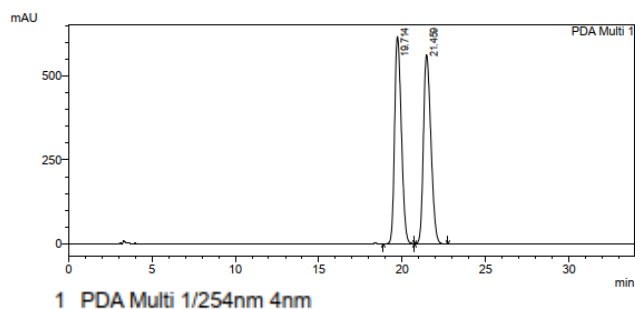

PDA Ch1 254nm 4nm

PeakTable

| Peak# | Ret. Time | Area     | Area %  |
|-------|-----------|----------|---------|
| 1     | 19.714    | 17464199 | 49.792  |
| 2     | 21.459    | 17609789 | 50.208  |
| Total |           | 35073989 | 100.000 |

(S)-**8e**

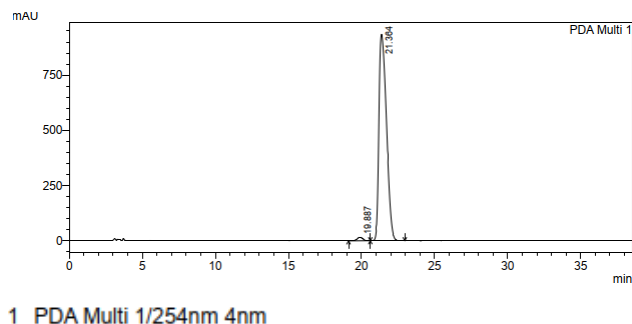

1 PDA Multi 1/254nm 4nm

PeakTable

| Peak# | Ret. Time | Area     | Area %  |
|-------|-----------|----------|---------|
| 1     | 19.887    | 451068   | 1.324   |
| 2     | 21.364    | 33620973 | 98.676  |
| Total |           | 34072040 | 100.000 |

(S)-1-((Chloromethyl)sulfinyl)-4-(trifluoromethyl)benzene **8f**

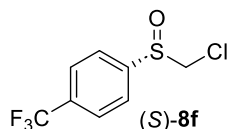

**Yield:** 66%. Purified by ISCO flash column chromatography (7:3 hexane:EtOAc v/v).

**<sup>1</sup>H NMR** (600 MHz, CDCl<sub>3</sub>) δ 7.85 (s, 4H), 4.46 (d, *J* = 12.0 Hz, 1H), 4.42 (d, *J* = 12.0 Hz, 1H).

**<sup>13</sup>C NMR** (151 MHz, CDCl<sub>3</sub>) δ 145.3, 126.5 (q), 125.6, 61.0.

**ESI MS.** C<sub>8</sub>H<sub>7</sub>ClF<sub>3</sub>OS m/z [M+H]<sup>+</sup> calc. 243.0, found 243.0.

**[α]<sub>D</sub><sup>26</sup>** +135.97 (c 0.25, EtOH).

**Chiral HPLC** Chiralpak AD-H, 10% IPA/hexanes, 1.0 mL/min, 254nm.

(±)-**8f**

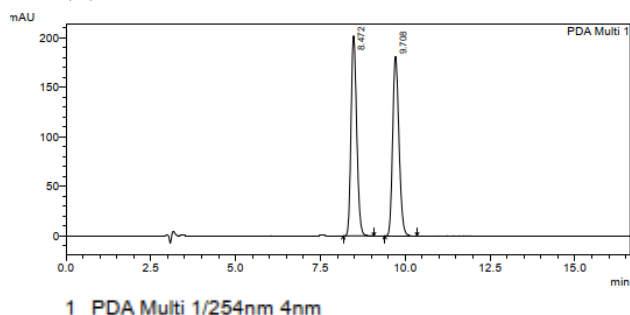

1 PDA Multi 1/254nm 4nm

PeakTable

| Peak# | Ret. Time | Area    | Area %  |
|-------|-----------|---------|---------|
| 1     | 8.472     | 2351879 | 50.013  |
| 2     | 9.708     | 2350615 | 49.987  |
| Total |           | 4702494 | 100.000 |

(S)-**8f**

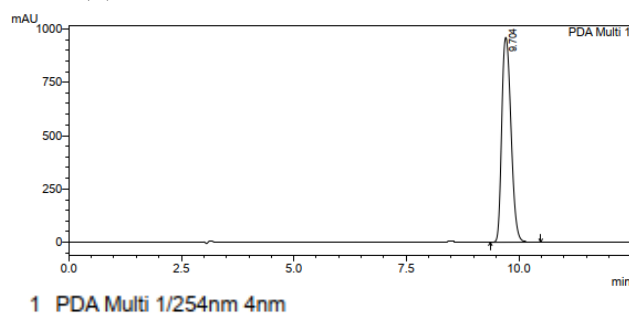

1 PDA Multi 1/254nm 4nm

PeakTable

| Peak# | Ret. Time | Area     | Area %  |
|-------|-----------|----------|---------|
| 1     | 9.704     | 13747110 | 100.000 |
| Total |           | 13747110 | 100.000 |

### (S)-1-Chloro-4-((chloromethyl)sulfinyl)benzene **8g**

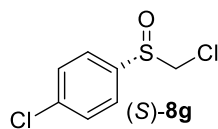

**Yield:** 72%. Purified by ISCO flash column chromatography (3:2 hexane:EtOAc v/v).

**<sup>1</sup>H NMR** (600 MHz, CDCl<sub>3</sub>) δ 7.67 - 7.64 (m, 2H), 7.57 - 7.54 (m, 2H), 4.38 (s, 2H).

**<sup>13</sup>C NMR** (151 MHz, CDCl<sub>3</sub>) δ 139.4, 138.8, 129.8, 126.4, 61.1.

**ESI MS.** C<sub>7</sub>H<sub>7</sub>Cl<sub>2</sub>OS m/z [M+H]<sup>+</sup> calc. 208.9, found 209.0.

**[α]<sub>D</sub><sup>25</sup>** +131.97 (c 0.1, EtOH).

**Chiral HPLC** Chiralpak IC, 10% IPA/hexanes, 1.0 mL/min, 254nm.

(±)-**8g**

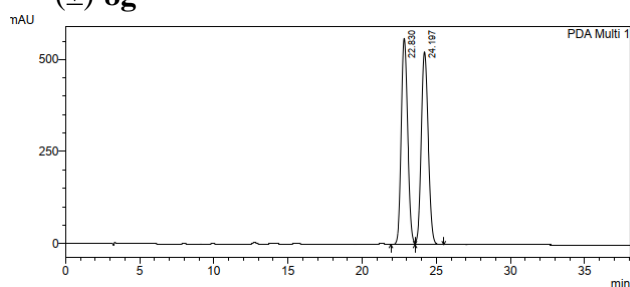

1 PDA Multi 1/254nm 4nm

| PDA Ch1 254nm 4nm |           |          |         |
|-------------------|-----------|----------|---------|
| Peak#             | Ret. Time | Area     | Area %  |
| 1                 | 22.830    | 16932587 | 49.827  |
| 2                 | 24.197    | 17050205 | 50.173  |
| Total             |           | 33982792 | 100.000 |

(S)-**8g**

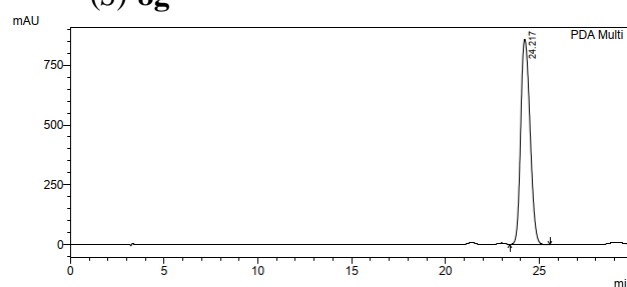

1 PDA Multi 1/254nm 4nm

| PDA Ch1 254nm 4nm |           |          |         |
|-------------------|-----------|----------|---------|
| Peak#             | Ret. Time | Area     | Area %  |
| 1                 | 24.217    | 29690860 | 100.000 |
| Total             |           | 29690860 | 100.000 |

## XI. General procedure for the synthesis of (dichloromethyl)sulfinyl derivatives

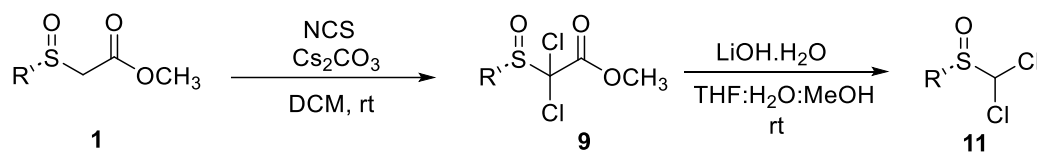

To a solution of methyl ester **1** (0.2 mmol, 1.0 equiv) in CH<sub>2</sub>Cl<sub>2</sub> (2 mL) was added Cs<sub>2</sub>CO<sub>3</sub> (130 mg, 0.4 mmol, 2.0 equiv) at room temperature. Then N-chlorosuccinimide, (107 mg, 0.8 mmol, 4.0 equiv) was added and the resulting solution was stirred at room temperature for 4-12h. The reaction mixture was quenched by addition of water and the water layer was extracted with CH<sub>2</sub>Cl<sub>2</sub> (3 × 10). The organic layers were combined and dried over Na<sub>2</sub>SO<sub>4</sub>. Filtration, followed by concentration *in vacuo* gave the crude product, which was then purified by ISCO flash column chromatography.

A mixture of above dichloro derivative **9** (0.1 mmol, 1.0 equiv), lithium hydroxide (8.0 mg, 0.2 mmol, 2.0 equiv), THF (0.5 mL), water (0.25 mL) and MeOH (0.12 mL), was stirred at room temperature for 4-6 h. The organic solvent was removed under reduced pressure, and the residue obtained was then acidified to pH 3 with 1 N HCl, and the mixture was extracted with

EtOAc (3 × 10 mL). The combined extracts were dried over anhydrous Na<sub>2</sub>SO<sub>4</sub>, filtered, and concentrated under reduced pressure to give the crude product which was purified by ISCO flash column chromatography.

**(S)-((dichloromethyl)sulfinyl)cyclohexane 11a**

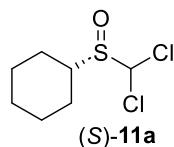

**Methyl (S)-2,2-dichloro-2-(cyclohexylsulfinyl)acetate 9a**

**Yield:** 81%, purified by ISCO flash column chromatography (7:3 hexane:EtOAc v/v).

**<sup>1</sup>H NMR** (400 MHz, CDCl<sub>3</sub>) δ 3.95 (s, 3H), 3.21 - 3.13 (m, 1H), 2.03 - 1.80 (m, 4H), 1.73 - 1.51 (m, 3H), 1.44 - 1.25 (m, 3H).

**<sup>13</sup>C NMR** (101 MHz, CDCl<sub>3</sub>) δ 163.3, 92.8, 59.2, 55.5, 29.4, 25.6, 25.3, 25.1, 25.1.

**ESI MS** C<sub>9</sub>H<sub>15</sub>Cl<sub>2</sub>O<sub>3</sub>S m/z [M+H]<sup>+</sup> calc. 273.0, found 273.0.

**(S)-((Dichloromethyl)sulfinyl)cyclohexane 11a**

**Yield:** 72%, purified by ISCO flash column chromatography (4:1 hexane:EtOAc v/v).

**<sup>1</sup>H NMR** (400 MHz, CDCl<sub>3</sub>) δ 6.24 (s, 1H), 3.06 - 2.98 (m, 1H), 2.00 - 1.86 (m, 4H), 1.72 - 1.53 (m, 3H), 1.44 - 1.21 (m, 3H).

**<sup>13</sup>C NMR** (101 MHz, CDCl<sub>3</sub>) δ 79.8, 57.8, 27.6, 25.5, 25.3, 25.1, 23.8.

**ESI MS.** C<sub>7</sub>H<sub>13</sub>Cl<sub>2</sub>OS m/z [M+H]<sup>+</sup> calc. 215.0, found 215.0.

**[α]<sup>25</sup><sub>D</sub>** -16.51 (c 0.230, EtOH).

**Chiral HPLC** Chiralpak IC, 10% IPA/hexanes, 1.0 mL/min, 254nm.

**(±)-11a**

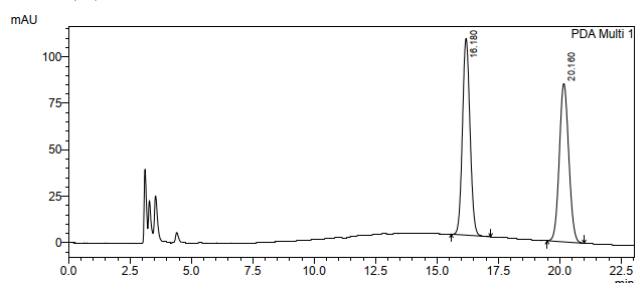

1 PDA Multi 1/220nm 4nm

PeakTable

| PDA Ch1 220nm 4nm |           |         |         |
|-------------------|-----------|---------|---------|
| Peak#             | Ret. Time | Area    | Area %  |
| 1                 | 16.180    | 2263609 | 49.819  |
| 2                 | 20.160    | 2280061 | 50.181  |
| Total             |           | 4543670 | 100.000 |

**(S)-11a**

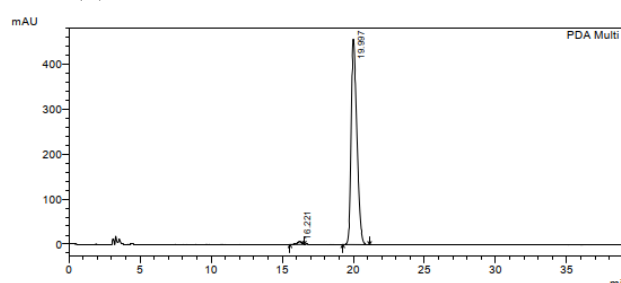

1 PDA Multi 1/220nm 4nm

PeakTable

| PDA Ch1 220nm 4nm |           |          |         |
|-------------------|-----------|----------|---------|
| Peak#             | Ret. Time | Area     | Area %  |
| 1                 | 16.221    | 147646   | 1.128   |
| 2                 | 19.997    | 12942132 | 98.872  |
| Total             |           | 13089778 | 100.000 |

**(S)-1-((dichloromethyl)sulfinyl)hexane 11b**

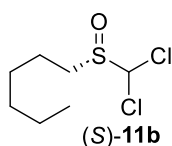

**Methyl (S)-2,2-dichloro-2-(hexylsulfinyl)acetate 9b**

**Yield:** 75%, purified by ISCO flash column chromatography (7:3 hexane:EtOAc v/v).

**<sup>1</sup>H NMR** (400 MHz, CDCl<sub>3</sub>) δ 3.94 (s, 3H), 2.97 - 2.90 (m, 1H), 2.84 - 2.77 (m, 1H), 1.88 - 1.77 (m, 2H), 1.55 - 1.38 (m, 2H), 1.34 - 1.25 (m, 4H), 0.86 (t, *J* = 8.0 Hz, 3H).

**<sup>13</sup>C NMR** (101 MHz, CDCl<sub>3</sub>) δ 163.1, 92.3, 55.5, 50.0, 31.3, 28.5, 22.9, 22.4, 13.9.

**ESI MS** C<sub>9</sub>H<sub>17</sub>Cl<sub>2</sub>O<sub>3</sub>S m/z [M+H]<sup>+</sup> calc. 275.0, found 275.1.

### (*S*)-1-((Dichloromethyl)sulfinyl)hexane 11b

**Yield:** 70%, purified by ISCO flash column chromatography (3:1 hexane:EtOAc v/v).

**<sup>1</sup>H NMR** (600 MHz, CDCl<sub>3</sub>) δ 6.29 (s, 1H), 2.96 - 2.87 (m, 2H), 1.90 - 1.80 (m, 2H), 1.55 - 1.44 (m, 2H), 1.36 - 1.31 (m, 4H), 0.90 (t, *J* = 6.0 Hz, 3H).

**<sup>13</sup>C NMR** (151 MHz, CDCl<sub>3</sub>) δ 80.5, 48.1, 31.4, 28.6, 22.5, 22.4, 14.1.

**ESI MS.** C<sub>7</sub>H<sub>15</sub>Cl<sub>2</sub>OS m/z [M+H]<sup>+</sup> calc. 217.0, found 217.0.

**[α]<sub>D</sub><sup>25</sup>** -95.21 (c 0.21, EtOH).

**Chiral HPLC** Chiralpak IC, 10% IPA/hexanes, 1.0 mL/min, 254nm.

(±)-11b

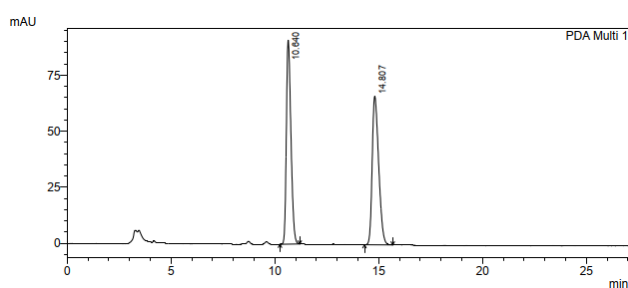

1 PDA Multi 1/254nm 4nm

| PDA Ch1 254nm 4nm |           |         |         |
|-------------------|-----------|---------|---------|
| Peak#             | Ret. Time | Area    | Area %  |
| 1                 | 10.640    | 1395290 | 49.288  |
| 2                 | 14.807    | 1435603 | 50.712  |
| Total             |           | 2830893 | 100.000 |

(*S*)-11b

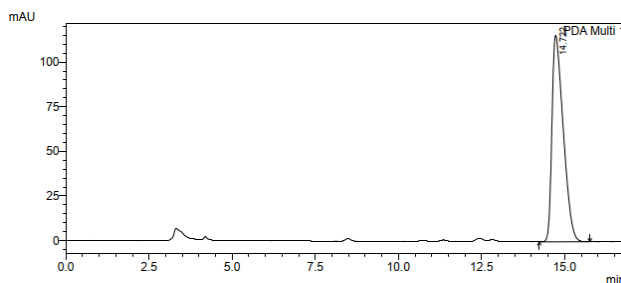

1 PDA Multi 1/254nm 4nm

| PDA Ch1 254nm 4nm |           |         |         |
|-------------------|-----------|---------|---------|
| Peak#             | Ret. Time | Area    | Area %  |
| 1                 | 14.722    | 2739895 | 100.000 |
| Total             |           | 2739895 | 100.000 |

### (*S*)-((Dichloromethyl)sulfinyl)benzene 11c

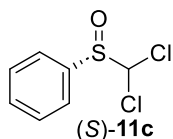

### Methyl (*S*)-2,2-dichloro-2-(phenylsulfinyl)acetate 9c

**Yield:** 93%, purified by ISCO flash column chromatography (7:3 hexane:EtOAc v/v).

**<sup>1</sup>H NMR** (400 MHz, CDCl<sub>3</sub>) δ 7.79 - 7.77 (m, 2H), 7.64 - 7.59 (m, 1H), 7.55 - 7.51 (m, 2H), 3.85 (s, 3H).

**<sup>13</sup>C NMR** (101 MHz, CDCl<sub>3</sub>) δ 162.9, 138.1, 133.6, 128.8, 127.3, 55.2.

**ESI MS** C<sub>9</sub>H<sub>9</sub>Cl<sub>2</sub>O<sub>3</sub>S m/z [M+H]<sup>+</sup> calc. 266.9, found 266.9.

### (*S*)-((Dichloromethyl)sulfinyl)benzene 11c

**Yield:** 85%, purified by ISCO flash column chromatography (4:1 hexane:EtOAc v/v).

**<sup>1</sup>H NMR** (400 MHz, CDCl<sub>3</sub>) δ 7.81 - 7.78 (m, 2H), 7.66 - 7.55 (m, 3H), 6.18 (s, 1H).

**<sup>13</sup>C NMR** (101 MHz, CDCl<sub>3</sub>) δ 138.2, 133.2, 129.1, 126.8, 83.2.

**ESI MS.** C<sub>7</sub>H<sub>7</sub>Cl<sub>2</sub>OS m/z [M+H]<sup>+</sup> calc. 208.9, found 208.9.

[ $\alpha$ ]<sub>D</sub><sup>25</sup> +147.16 (c 0.5, EtOH).

**Chiral HPLC** Chiralcel OD-H, 10% IPA/hexanes, 1.0 mL/min, 254nm.

(±)-**11c**

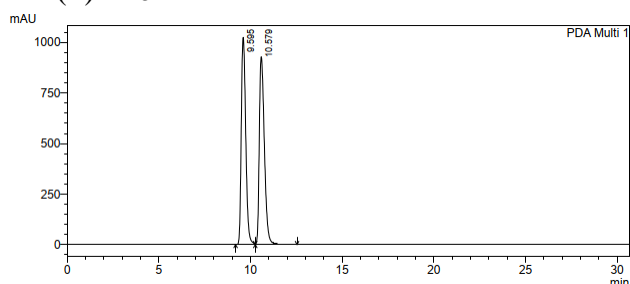

1 PDA Multi 1/254nm 4nm

| PDA Ch1 254nm 4nm |           |          |         | PeakTable |
|-------------------|-----------|----------|---------|-----------|
| Peak#             | Ret. Time | Area     | Area %  |           |
| 1                 | 9.595     | 17371723 | 49.212  |           |
| 2                 | 10.579    | 17928053 | 50.788  |           |
| Total             |           | 35299775 | 100.000 |           |

(S)-**11c**

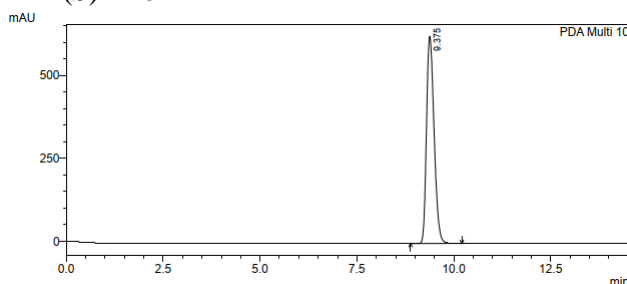

1 PDA Multi 10/254nm 4nm

| PDA Ch10 254nm 4nm |           |         |         | PeakTable |
|--------------------|-----------|---------|---------|-----------|
| Peak#              | Ret. Time | Area    | Area %  |           |
| 1                  | 9.375     | 8494603 | 100.000 |           |
| Total              |           | 8494603 | 100.000 |           |

(S)-1-((Dichloromethyl)sulfinyl)-4-methoxybenzene **11d**

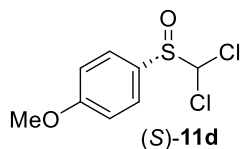

**Methyl (S)-2,2-dichloro-2-((4-methoxyphenyl)sulfinyl)acetate 9d**

**Yield:** 92%, purified by ISCO flash column chromatography (3:2 hexane:EtOAc v/v).

<sup>1</sup>H NMR (400 MHz, CDCl<sub>3</sub>)  $\delta$  7.72 - 7.68 (m, 2H), 7.03 - 6.99 (m, 2H), 3.86 (s, 3H), 3.84 (s, 3H).

<sup>13</sup>C NMR (101 MHz, CDCl<sub>3</sub>)  $\delta$  164.0, 163.1, 129.3, 128.6, 114.3, 94.5, 55.7, 55.2.

**ESI MS** C<sub>10</sub>H<sub>11</sub>Cl<sub>2</sub>O<sub>4</sub>S m/z [M+H]<sup>+</sup> calc. 297.0, found 297.1.

(S)-1-((Dichloromethyl)sulfinyl)-4-methoxybenzene **11d**

**Yield:** 86%, purified by ISCO flash column chromatography (7:3 hexane:EtOAc v/v).

<sup>1</sup>H NMR (400 MHz, CDCl<sub>3</sub>)  $\delta$  7.73 - 7.70 (m, 2H), 7.07 - 7.03 (m, 2H), 6.14 (s, 1H), 3.87 (s, 3H).

<sup>13</sup>C NMR (101 MHz, CDCl<sub>3</sub>)  $\delta$  163.7, 128.8, 128.7, 114.6, 83.3, 55.7.

**ESI MS.** C<sub>8</sub>H<sub>9</sub>Cl<sub>2</sub>O<sub>2</sub>S m/z [M+H]<sup>+</sup> calc. 238.9, found 239.1.

[ $\alpha$ ]<sub>D</sub><sup>25</sup> +106.38 (c 0.125, EtOH).

**Chiral HPLC** Chiralpak IC, 20% IPA/hexanes, 1.0 mL/min, 254nm

**(±)-11d**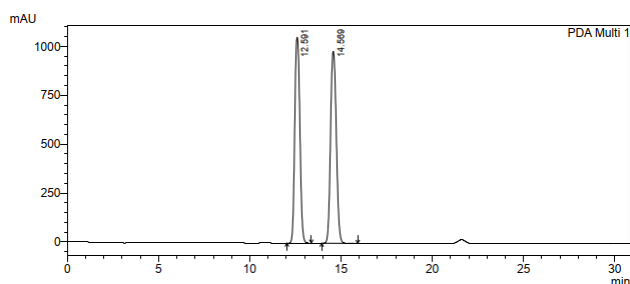

1 PDA Multi 1/254nm 4nm

PDA Ch1 254nm 4nm

| Peak# | Ret. Time | Area     | Area %  |
|-------|-----------|----------|---------|
| 1     | 12.591    | 20549967 | 48.843  |
| 2     | 14.569    | 21523753 | 51.157  |
| Total |           | 42073720 | 100.000 |

PeakTable

**(S)-11d**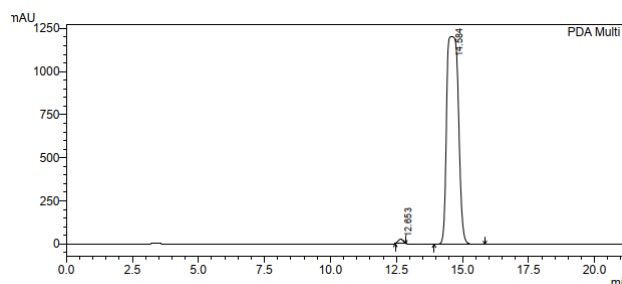

1 PDA Multi 1/254nm 4nm

PDA Ch1 254nm 4nm

| Peak# | Ret. Time | Area     | Area %  |
|-------|-----------|----------|---------|
| 1     | 12.653    | 344303   | 0.915   |
| 2     | 14.584    | 37295341 | 99.085  |
| Total |           | 37639644 | 100.000 |

PeakTable

**(S)-1-((Dichloromethyl)sulfinyl)-4-methylbenzene 11e**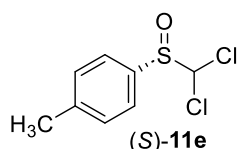**Methyl (S)-2,2-dichloro-2-(p-tolylsulfinyl)acetate 9e****Yield:** 91%, purified by ISCO flash column chromatography (3:2 hexane:EtOAc v/v).**<sup>1</sup>H NMR** (400 MHz, CDCl<sub>3</sub>) δ 7.70 - 7.67 (m, 2H), 7.36 - 7.34 (m, 2H), 3.89 (s, 3H), 2.45 (s, 3H).**<sup>13</sup>C NMR** (151 MHz, CDCl<sub>3</sub>) δ 163.2, 144.7, 134.8, 129.6, 127.4, 94.3, 55.3, 21.8.**ESI MS** C<sub>10</sub>H<sub>11</sub>Cl<sub>2</sub>O<sub>3</sub>S m/z [M+H]<sup>+</sup> calc. 281.0, found 281.1.**(S)-1-((dichloromethyl)sulfinyl)-4-methylbenzene 11e****Yield:** 82%, purified by ISCO flash column chromatography (3:1 hexane:EtOAc v/v).**<sup>1</sup>H NMR** (400 MHz, CDCl<sub>3</sub>) δ 7.69 - 7.66 (m, 2H), 7.39 - 7.36 (m, 2H), 6.14 (s, 1H), 2.45 (s, 3H).**<sup>13</sup>C NMR** (151 MHz, CDCl<sub>3</sub>) δ 144.1, 134.8, 129.9, 126.8, 83.2, 21.8.**ESI MS.** C<sub>8</sub>H<sub>9</sub>Cl<sub>2</sub>OS m/z [M+H]<sup>+</sup> calc. 222.9, found 223.0.**[α]<sup>26</sup><sub>D</sub>** +175.95 (c 0.125, EtOH).**Chiral HPLC** Chiralcel OD-H, 10% IPA/hexanes, 1.0 mL/min, 254nm.**(±)-11e**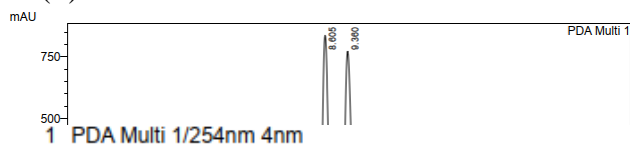

1 PDA Multi 1/254nm 4nm

PDA Ch1 254nm 4nm

| Peak# | Ret. Time | Area     | Area %  |
|-------|-----------|----------|---------|
| 1     | 8.605     | 10518240 | 49.883  |
| 2     | 9.360     | 10567385 | 50.117  |
| Total |           | 21085624 | 100.000 |

PeakTable

**(S)-11e**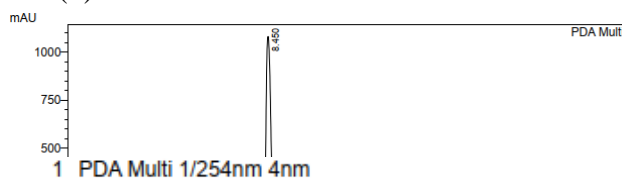

1 PDA Multi 1/254nm 4nm

PDA Ch1 254nm 4nm

| Peak# | Ret. Time | Area     | Area %  |
|-------|-----------|----------|---------|
| 1     | 8.450     | 15466607 | 100.000 |
| Total |           | 15466607 | 100.000 |

PeakTable

### (S)-1-((Dichloromethyl)sulfinyl)-4-(trifluoromethyl)benzene 11f

#### Methyl (S)-2,2-dichloro-2-((4-(trifluoromethyl)phenyl)sulfinyl)acetate 9f

**Yield:** 81%, purified by ISCO flash column chromatography (7:3 hexane:EtOAc v/v).

**<sup>1</sup>H NMR** (400 MHz, CDCl<sub>3</sub>) δ 7.96 (d, *J* = 8.0 Hz, 2H), 7.82 (d, *J* = 8.0 Hz, 2H), 3.93 (s, 3H).

**<sup>13</sup>C NMR** (101 MHz, CDCl<sub>3</sub>) δ 162.8, 142.3, 135.5 (q), 128.2, 125.8 (q), 124.8 (q), 93.7, 55.6.

**ESI MS.** C<sub>10</sub>H<sub>8</sub>Cl<sub>2</sub>F<sub>3</sub>OS *m/z* [M+H]<sup>+</sup> calc. 334.9, found 334.9.

### (S)-1-((dichloromethyl)sulfinyl)-4-(trifluoromethyl)benzene 11f

**Yield:** 48%, purified by ISCO flash column chromatography (4:1 hexane:EtOAc v/v).

**<sup>1</sup>H NMR** (400 MHz, CDCl<sub>3</sub>) δ 7.94 (d, *J* = 8.0 Hz, 2H), 7.85 (d, *J* = 8.0 Hz, 2H), 6.23 (s, 1H).

**<sup>13</sup>C NMR** (101 MHz, CDCl<sub>3</sub>) δ 127.5, 126.1 (q), 82.6.

**ESI MS.** C<sub>8</sub>H<sub>6</sub>F<sub>3</sub>Cl<sub>2</sub>OS *m/z* [M+H]<sup>+</sup> calc. 276.9, found 276.9.

**[α]<sup>25</sup><sub>D</sub>** +21.39 (c 0.215, CH<sub>2</sub>Cl<sub>2</sub>).

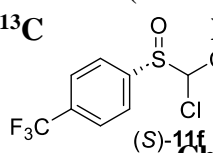

**Chiral HPLC** Chiralpak IC, 10% IPA/hexanes, 1.0 mL/min, 254nm.

(±)-11f

(S)-11f

mAU 1 PDA Multi 1/254nm 4nm

mAU 1 PDA Multi 1/254nm 4nm

PeakTable

| Peak# | Ret. Time | Area    | Area %  |
|-------|-----------|---------|---------|
| 1     | 8.961     | 4590407 | 49.770  |
| 2     | 11.188    | 4632865 | 50.230  |
| Total |           | 9223273 | 100.000 |

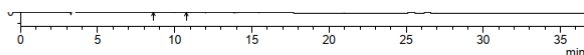

PeakTable

| Peak# | Ret. Time | Area     | Area %  |
|-------|-----------|----------|---------|
| 1     | 8.930     | 148967   | 1.172   |
| 2     | 11.111    | 12557948 | 98.828  |
| Total |           | 12706915 | 100.000 |

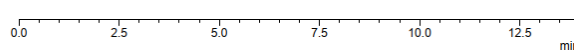

### (S)-1-Chloro-4-((dichloromethyl)sulfinyl)benzene 11g

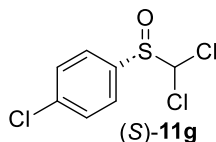

#### Methyl (S)-2,2-dichloro-2-((4-chlorophenyl)sulfinyl)acetate 9g

**Yield:** 83%, purified by ISCO flash column chromatography (7:3 hexane:EtOAc v/v).

**<sup>1</sup>H NMR** (400 MHz, CDCl<sub>3</sub>) δ 7.82 - 7.73 (m, 2H), 7.59 - 7.53 (m, 2H), 3.92 (s, 3H).

**<sup>13</sup>C NMR** (101 MHz, CDCl<sub>3</sub>) δ 162.9, 140.2, 136.5, 129.2, 128.8, 93.9, 55.4.

**ESI MS.** C<sub>9</sub>H<sub>8</sub>Cl<sub>3</sub>OS *m/z* [M+H]<sup>+</sup> calc. 300.9, found 301.0.

### (S)-1-Chloro-4-((dichloromethyl)sulfinyl)benzene 11g

**Yield:** 56%, purified by ISCO flash column chromatography (3:1 hexane:EtOAc v/v).

**<sup>1</sup>H NMR** (600 MHz, CDCl<sub>3</sub>) δ 7.75 - 7.72 (m, 2H), 7.57 - 7.55 (m, 2H), 6.19 (s, 1H).

**<sup>13</sup>C NMR** (151 MHz, CDCl<sub>3</sub>) δ 139.9, 136.2, 129.5, 128.3, 82.8, 29.8.

**ESI MS.** C<sub>7</sub>H<sub>6</sub>Cl<sub>3</sub>OS *m/z* [M+H]<sup>+</sup> calc. 242.9, found 242.9.

**[α]<sup>25</sup><sub>D</sub>** +131.97 (c 0.25, EtOH).

**Chiral HPLC** Chiralpak AD-H, 10% IPA/hexanes, 1.0 mL/min, 254nm.



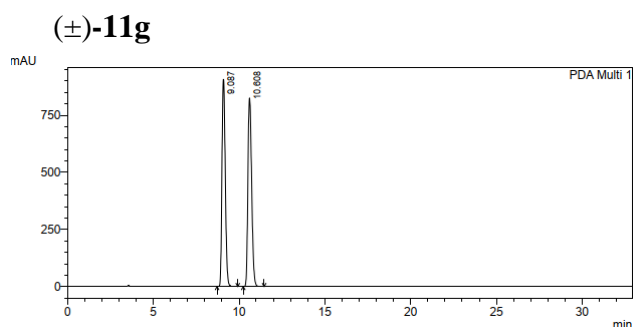

1 PDA Multi 1/254nm 4nm

| PeakTable |           |          |         |
|-----------|-----------|----------|---------|
| Peak#     | Ret. Time | Area     | Area %  |
| 1         | 9.087     | 12223220 | 49.362  |
| 2         | 10.608    | 12539273 | 50.638  |
| Total     |           | 24762493 | 100.000 |

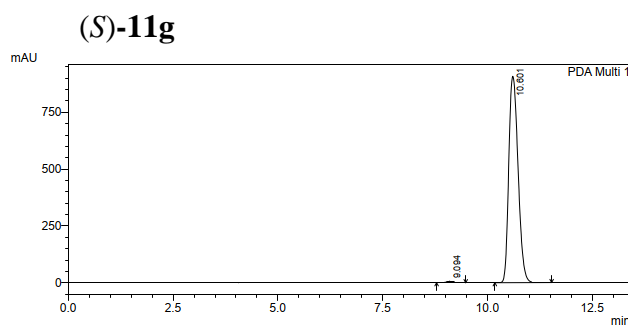

1 PDA Multi 1/254nm 4nm

| PeakTable |           |          |         |
|-----------|-----------|----------|---------|
| Peak#     | Ret. Time | Area     | Area %  |
| 1         | 9.094     | 79222    | 0.562   |
| 2         | 10.601    | 14011985 | 99.438  |
| Total     |           | 14091207 | 100.000 |

## XII General procedure for the synthesis of (dibromomethyl)sulfinyl derivatives

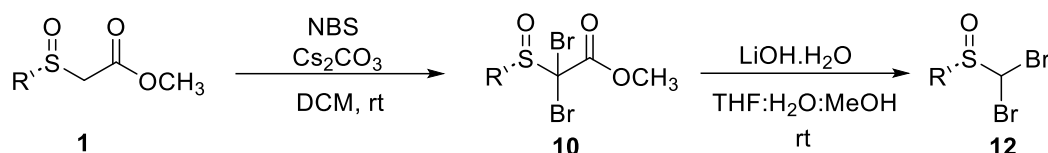

To a solution of methyl ester **1** (0.2 mmol, 1.0 equiv) in CH<sub>2</sub>Cl<sub>2</sub> (2 mL) were added Cs<sub>2</sub>CO<sub>3</sub> (130 mg, 0.4 mmol, 2.0 equiv) and N-bromosuccinimide, (142 mg, 0.8 mmol, 4.0 equiv) at room temperature. The resulting solution was stirred at room temperature for 4-12h. The reaction mixture was quenched by addition of water, and the water layer was extracted with CH<sub>2</sub>Cl<sub>2</sub> (3 × 10). The organic layers were combined and dried over Na<sub>2</sub>SO<sub>4</sub>. Filtration, followed by evaporation of the solvent gave the crude product, which was then purified by ISCO flash column chromatography.

A mixture of above dibromo derivative **10** (0.1 mmol, 1.0 equiv), lithium hydroxide (8.0 mg, 0.2 mmol), THF (0.5 mL), water (0.25 mL) and MeOH (0.12 mL), were stirred at room temperature for 4-6 h. The organic solvent was removed under reduced pressure, and the residue obtained was then acidified to pH 3 with 1 N HCl, and the mixture was extracted with EtOAc (3 × 10 mL). The combined extracts were dried over anhydrous Na<sub>2</sub>SO<sub>4</sub>, filtered, and concentrated under reduced pressure to give the crude product which was purified by ISCO flash column chromatography.

### (S)-((Dibromomethyl)sulfinyl)cyclohexane **12a**

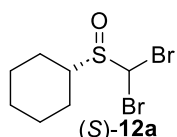

### Methyl (S)-2,2-dibromo-2-(cyclohexylsulfinyl)acetate **10a**

**Yield:** 81%, purified by ISCO flash column chromatography (3:1 hexane:EtOAc v/v).

**<sup>1</sup>H NMR** (400 MHz, CDCl<sub>3</sub>) δ 3.93 (s, 3H), 3.14 - 3.07 (m, 1H), 2.09 - 1.81 (m, 4H), 1.67 - 1.26 (m, 6H).

**<sup>13</sup>C NMR** (101 MHz, CDCl<sub>3</sub>) δ 163.6, 71.8, 61.1, 55.5, 29.9, 25.7, 25.4, 25.3, 25.2.

**ESI MS** C<sub>9</sub>H<sub>15</sub>Br<sub>2</sub>O<sub>3</sub>S m/z [M+H]<sup>+</sup> calc. 362.9, found 362.9.

### (S)-((Dibromomethyl)sulfinyl)cyclohexane **12a**

**Yield:** 65%, purified by ISCO flash column chromatography (4:1 hexane:EtOAc v/v).

**<sup>1</sup>H NMR** (400 MHz, CDCl<sub>3</sub>) δ 6.20 (s, 1H), 3.05 - 2.98 (m, 1H), 2.06 - 1.86 (m, 4H), 1.74 - 1.55 (m, 3H), 1.45 - 1.25 (m, 3H).

**<sup>13</sup>C NMR** (101 MHz, CDCl<sub>3</sub>) δ 59.5, 53.3, 28.0, 25.6, 25.3, 25.1, 24.1.

**ESI MS.** C<sub>7</sub>H<sub>13</sub>Br<sub>2</sub>OS m/z [M+H]<sup>+</sup> calc. 304.9, found 304.9

**[α]<sup>25</sup><sub>D</sub>** -8.51 (c 0.235, EtOH).

**Chiral HPLC** Chiralpak IC, 10% IPA/hexanes, 1.0 mL/min, 220nm.

(±)-**12a**

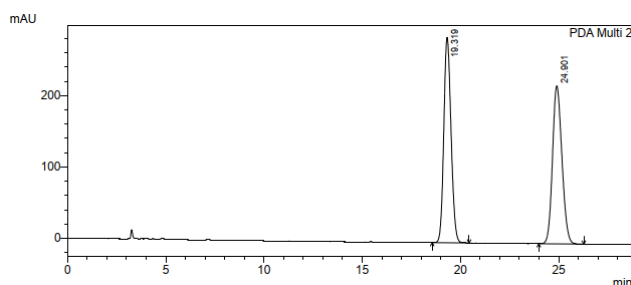

1 PDA Multi 2/220nm 4nm

PDA Ch2 220nm 4nm

| Peak# | Ret. Time | Area     | Area %  |
|-------|-----------|----------|---------|
| 1     | 19.319    | 7386472  | 49.989  |
| 2     | 24.901    | 7389674  | 50.011  |
| Total |           | 14776146 | 100.000 |

PeakTable

(S)-**12a**

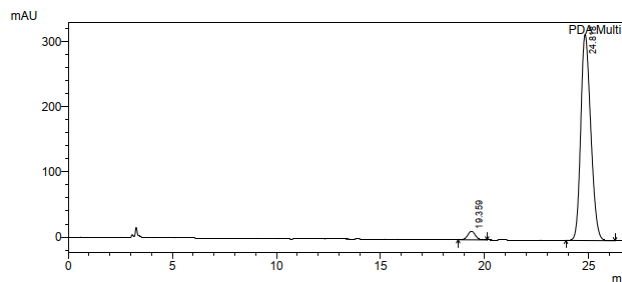

1 PDA Multi 2/220nm 4nm

PDA Ch2 220nm 4nm

| Peak# | Ret. Time | Area     | Area %  |
|-------|-----------|----------|---------|
| 1     | 19.359    | 334481   | 3.074   |
| 2     | 24.818    | 10544856 | 96.926  |
| Total |           | 10879337 | 100.000 |

PeakTable

### (S)-1-((Dibromomethyl)sulfinyl)hexane **12b**

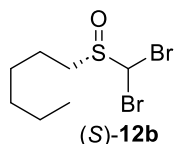

### Methyl (S)-2,2-dibromo-2-(hexylsulfinyl)acetate **10b**

**Yield:** 79%, purified by ISCO flash column chromatography (7:3 hexane:EtOAc v/v).

**<sup>1</sup>H NMR** (400 MHz, CDCl<sub>3</sub>) δ 3.95 (s, 3H), 3.12 - 3.05 (m, 1H), 2.82 - 2.75 (m, 1H), 1.94 - 1.78 (m, 2H), 1.57 - 1.41 (m, 2H), 1.37 - 1.28 (m, 4H), 0.88 (t, *J* = 8.0 Hz, 3H).

**<sup>13</sup>C NMR** (101 MHz, CDCl<sub>3</sub>) δ 163.6, 71.5, 55.6, 52.2, 31.4, 28.6, 23.1, 22.4, 14.0.

**ESI MS** C<sub>9</sub>H<sub>17</sub>Br<sub>2</sub>O<sub>3</sub>S m/z [M+H]<sup>+</sup> calc. 364.9, found 365.0

### (S)-1-((dibromomethyl)sulfinyl)hexane **12b**

**Yield:** 68%, purified by ISCO flash column chromatography (4:1 hexane:EtOAc v/v).

**<sup>1</sup>H NMR** (600 MHz, CDCl<sub>3</sub>) δ 6.29 (s, 1H), 2.96 - 2.87 (m, 2H), 1.91 - 1.79 (m, 2H), 1.55 - 1.45 (m, 2H), 1.36 - 1.30 (m, 4H), 0.95 - 0.85 (m, 3H).

**<sup>13</sup>C NMR** (151 MHz, CDCl<sub>3</sub>) δ 80.5, 48.1, 31.4, 28.6, 22.5, 22.4, 14.1.

**ESI MS.** C<sub>7</sub>H<sub>15</sub>Br<sub>2</sub>OS m/z [M+H]<sup>+</sup> calc. 306.9, found 306.9.

**[α]<sup>25</sup><sub>D</sub>** -97.75 (c 0.09, EtOH).

Chiral HPLC Chiralpak IC, 10% IPA/hexanes, 1.0 mL/min, 254nm.

(±)-12b

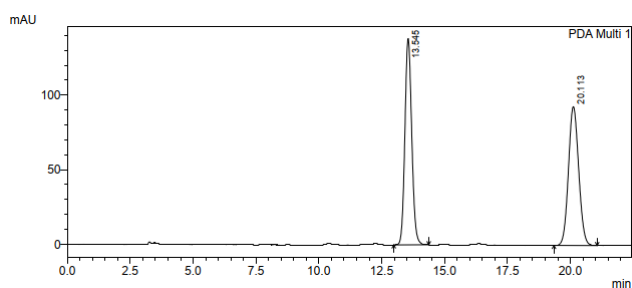

1 PDA Multi 1/254nm 4nm

PDA Ch1 254nm 4nm

PeakTable

| Peak# | Ret. Time | Area    | Area %  |
|-------|-----------|---------|---------|
| 1     | 13.545    | 2624530 | 50.019  |
| 2     | 20.113    | 2622514 | 49.981  |
| Total |           | 5247043 | 100.000 |

(S)-12b

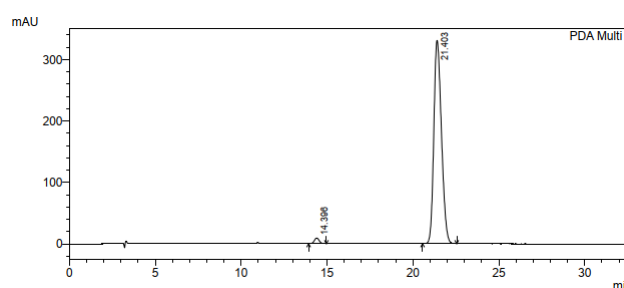

1 PDA Multi 1/254nm 4nm

PDA Ch1 254nm 4nm

PeakTable

| Peak# | Ret. Time | Area     | Area %  |
|-------|-----------|----------|---------|
| 1     | 14.396    | 182100   | 1.752   |
| 2     | 21.403    | 10211980 | 98.248  |
| Total |           | 10394079 | 100.000 |

(S)-((Dibromomethyl)sulfinyl)benzene 12c

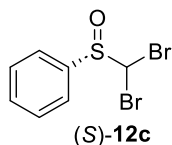

Methyl (S)-2,2-dibromo-2-(phenylsulfinyl)acetate 10c

**Yield:** 92%, purified by ISCO flash column chromatography (7:3 hexane:EtOAc v/v).

**<sup>1</sup>H NMR** (400 MHz, CDCl<sub>3</sub>) δ 7.85 - 7.82 (m, 2H), 7.63 - 7.59 (m, 1H), 7.54 - 7.49 (m, 2H), 3.86 (s, 3H).

**<sup>13</sup>C NMR** (101 MHz, CDCl<sub>3</sub>) δ 163.4, 138.9, 133.5, 128.6, 127.8, 74.2, 55.4.

**ESI MS** C<sub>9</sub>H<sub>9</sub>Br<sub>2</sub>O<sub>3</sub>S m/z [M+H]<sup>+</sup> calc. 356.8, found 356.8

(S)-((Dibromomethyl)sulfinyl)benzene 12c

**Yield:** 79%, purified by ISCO flash column chromatography (4:1 hexane:EtOAc v/v).

**<sup>1</sup>H NMR** (400 MHz, CDCl<sub>3</sub>) δ 7.83 - 7.80 (m, 2H), 7.66 - 7.62 (m, 1H), 7.59 - 7.54 (m, 2H), 6.15 (s, 1H).

**<sup>13</sup>C NMR** (101 MHz, CDCl<sub>3</sub>) δ 133.2, 129.0, 126.9, 57.8.

**ESI MS.** C<sub>7</sub>H<sub>7</sub>Br<sub>2</sub>OS m/z [M+H]<sup>+</sup> calc. 298.8, found 298.8

[α]<sub>D</sub><sup>25</sup> +135.97 (c 0.05, EtOH).

Chiral HPLC Chiralcel OD-H, 10% IPA/hexanes, 1.0 mL/min, 254nm.

**(±)-12c**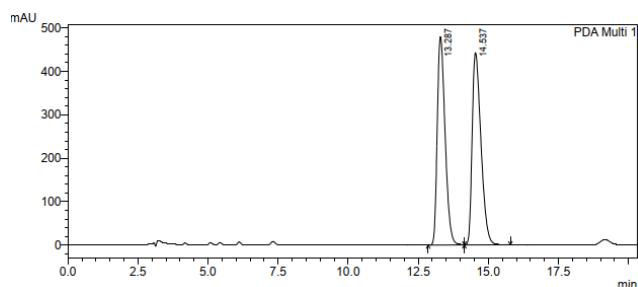

1 PDA Multi 1/254nm 4nm

**(S)-12c**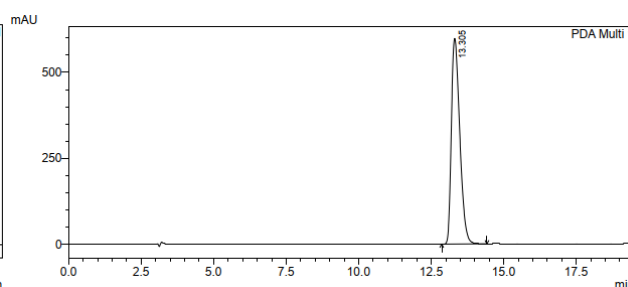

1 PDA Multi 1/254nm 4nm

PeakTable

PDA Ch1 254nm 4nm

| Peak# | Ret. Time | Area     | Area %  |
|-------|-----------|----------|---------|
| 1     | 13.287    | 9325394  | 49.071  |
| 2     | 14.537    | 9678514  | 50.929  |
| Total |           | 19003908 | 100.000 |

PeakTable

PDA Ch1 254nm 4nm

| Peak# | Ret. Time | Area     | Area %  |
|-------|-----------|----------|---------|
| 1     | 13.305    | 12060169 | 100.000 |
| Total |           | 12060169 | 100.000 |

**(S)-1-((Dibromomethyl)sulfinyl)-4-methoxybenzene 12d**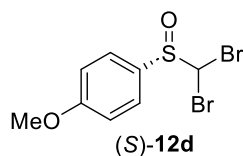**Methyl (S)-2,2-dibromo-2-((4-methoxyphenyl)sulfinyl)acetate 10d****Yield:** 87%, purified by ISCO flash column chromatography (1:1 hexane:EtOAc v/v).**<sup>1</sup>H NMR** (600 MHz, CDCl<sub>3</sub>) δ 7.79 - 7.76 (m, 2H), 7.03 - 7.00 (m, 2H), 3.89 (s, 3H), 3.87 (s, 3H).**<sup>13</sup>C NMR** (151 MHz, CDCl<sub>3</sub>) δ 163.9, 163.6, 129.8, 129.7, 114.1, 75.2, 55.7, 55.4.**ESI MS** C<sub>10</sub>H<sub>11</sub>Br<sub>2</sub>O<sub>4</sub>S m/z [M+H]<sup>+</sup> calc. 386.9, found 387.0.**(S)-1-((Dibromomethyl)sulfinyl)-4-methoxybenzene 12d****Yield:** 82%, purified by ISCO flash column chromatography (3:2 hexane:EtOAc v/v).**<sup>1</sup>H NMR** (600 MHz, CDCl<sub>3</sub>) δ 7.76 - 7.73 (m, 2H), 7.06 - 7.04 (m, 2H), 6.13 (s, 1H), 3.88 (s, 3H).**<sup>13</sup>C NMR** (151 MHz, CDCl<sub>3</sub>) δ 163.7, 129.6, 128.9, 114.4, 58.6, 55.8.**ESI MS.** C<sub>8</sub>H<sub>9</sub>Br<sub>2</sub>O<sub>2</sub>S m/z [M+H]<sup>+</sup> calc. 328.9, found 329.0**[α]<sup>25</sup><sub>D</sub>** +116.77 (c 0.25, EtOH).**Chiral HPLC** Chiralcel OD-H, 10% IPA/hexanes, 1.0 mL/min, 254nm.

**(±)-12d**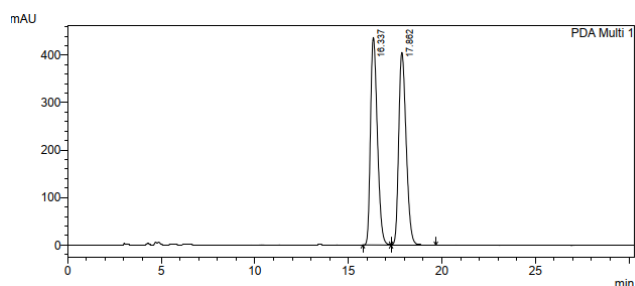

1 PDA Multi 1/254nm 4nm

PeakTable

| PDA Ch1 254nm 4nm |           |          |         |
|-------------------|-----------|----------|---------|
| Peak#             | Ret. Time | Area     | Area %  |
| 1                 | 16.337    | 11156642 | 49.848  |
| 2                 | 17.862    | 11224566 | 50.152  |
| Total             |           | 22381208 | 100.000 |

**(S)-12d**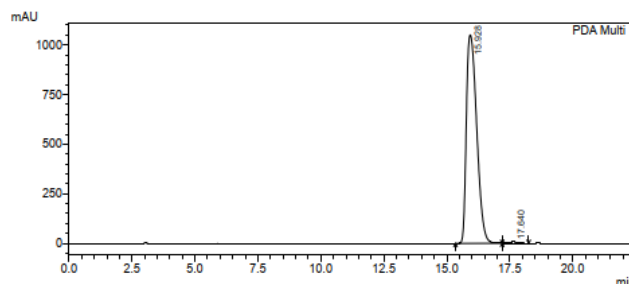

1 PDA Multi 1/254nm 4nm

PeakTable

| PDA Ch1 254nm 4nm |           |          |         |
|-------------------|-----------|----------|---------|
| Peak#             | Ret. Time | Area     | Area %  |
| 1                 | 15.928    | 29952336 | 99.323  |
| 2                 | 17.640    | 204257   | 0.677   |
| Total             |           | 30156593 | 100.000 |

**(S)-1-((Dibromomethyl)sulfinyl)-4-methylbenzene 12e**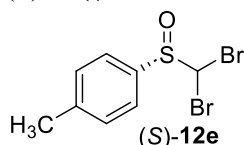**Methyl (S)-2,2-dibromo-2-(p-tolylsulfinyl)acetate 10e****Yield:** 87%, purified by ISCO flash column chromatography (3:2 hexane:EtOAc v/v).**<sup>1</sup>H NMR** (400 MHz, CDCl<sub>3</sub>) δ 7.75 - 7.72 (m, 2H), 7.35 - 7.32 (m, 2H), 3.90 (s, 3H), 2.44 (s, 3H).**<sup>13</sup>C NMR** (151 MHz, CDCl<sub>3</sub>) δ 163.6, 144.6, 135.9, 129.4, 127.8, 74.7, 55.5, 21.9.**ESI MS** C<sub>10</sub>H<sub>11</sub>Br<sub>2</sub>O<sub>3</sub>S m/z [M+H]<sup>+</sup> calc. 370.9, found 371.0.**(S)-1-((dibromomethyl)sulfinyl)-4-methylbenzene 12e****Yield:** 75%, purified by ISCO flash column chromatography (4:1 hexane:EtOAc v/v).**<sup>1</sup>H NMR** (400 MHz, CDCl<sub>3</sub>) δ 7.71 - 7.68 (m, 2H), 7.38 - 7.34 (m, 2H), 6.13 (s, 1H), 2.45 (s, 3H).**<sup>13</sup>C NMR** (151 MHz, CDCl<sub>3</sub>) δ 144.1, 135.8, 129.7, 126.9, 58.2, 21.8.**ESI MS.** C<sub>8</sub>H<sub>9</sub>Br<sub>2</sub>OS m/z [M+H]<sup>+</sup> calc. 312.9, found 313.0**[α]<sup>26</sup><sub>D</sub>** +114.14 (c 0.24, EtOH).**Chiral HPLC** Chiralcel OD-H, 10% IPA/hexanes, 1.0 mL/min, 254nm.**(±)-12e****(S)-12e**

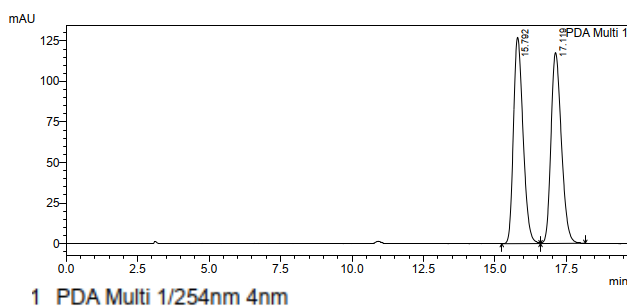

PDA Ch1 254nm 4nm

| Peak# | Ret. Time | Area    | Area %  |
|-------|-----------|---------|---------|
| 1     | 15.792    | 2969385 | 49.924  |
| 2     | 17.119    | 2978480 | 50.076  |
| Total |           | 5947865 | 100.000 |

PeakTable

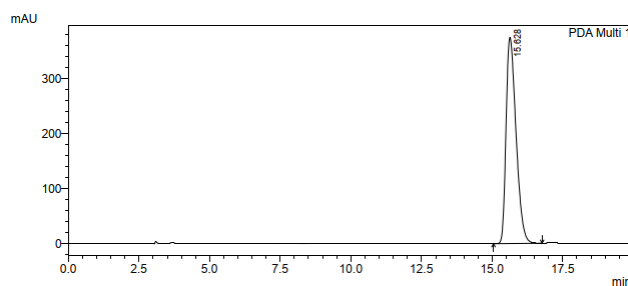

PDA Ch1 254nm 4nm

| Peak# | Ret. Time | Area    | Area %  |
|-------|-----------|---------|---------|
| 1     | 15.628    | 9209776 | 100.000 |
| Total |           | 9209776 | 100.000 |

PeakTable

**(S)-1-((Dibromomethyl)sulfinyl)-4-(trifluoromethyl)benzene 12f**

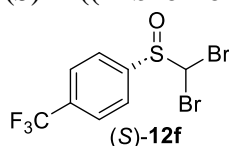

**Methyl (S)-2,2-dibromo-2-((4-(trifluoromethyl)phenyl)sulfinyl)acetate 10f**

**Yield:** 76%, purified by ISCO flash column chromatography (7:3 hexane:EtOAc v/v).

**<sup>1</sup>H NMR** (400 MHz, CDCl<sub>3</sub>) δ 8.02 - 7.99 (m, 2H), 7.81 - 7.78 (m, 2H), 3.93 (s, 3H).

**<sup>13</sup>C NMR** (101 MHz, CDCl<sub>3</sub>) δ 163.4, 143.4, 135.3 (q), 128.6, 125.6 (q), 124.8 (q), 73.2, 55.7.

**ESI MS.** C<sub>10</sub>H<sub>8</sub>Br<sub>2</sub>F<sub>3</sub>OS m/z [M+H]<sup>+</sup> calc. 424.8, found 424.8.

**(S)-1-((dibromomethyl)sulfinyl)-4-(trifluoromethyl)benzene 12f**

**Yield:** 30%, purified by ISCO flash column chromatography (4:1 hexane:EtOAc v/v).

**<sup>1</sup>H NMR** (600 MHz, CDCl<sub>3</sub>) δ 7.96 (d, *J* = 6.0 Hz, 2H), 7.84 (d, *J* = 6.0 Hz, 2H), 6.21 (s, 1H).

**<sup>13</sup>C NMR** (151 MHz, CDCl<sub>3</sub>) δ 143.1, 134.8 (q), 128.2, 127.6, 125.9 (q), 122.5(q), 56.8.

**ESI MS.** C<sub>8</sub>H<sub>6</sub>F<sub>3</sub>Br<sub>2</sub>OS m/z [M+H]<sup>+</sup> calc. 366.8, found 366.8.

**[α]<sup>25</sup><sub>D</sub>** +29.33 (c 0.075, CH<sub>2</sub>Cl<sub>2</sub>).

**Chiral HPLC** Chiralpak IC, 10% IPA/hexanes, 1.0 mL/min, 254nm.

**(±)-12f**

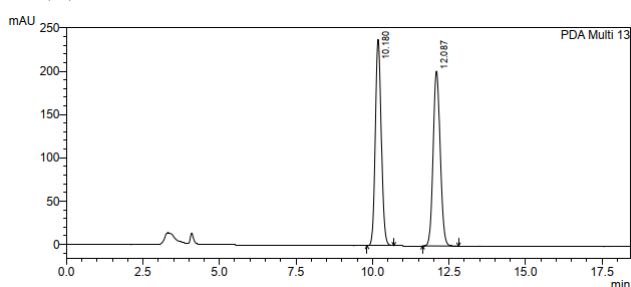

PDA Ch13 254nm 4nm

| Peak# | Ret. Time | Area    | Area %  |
|-------|-----------|---------|---------|
| 1     | 10.180    | 3228021 | 49.853  |
| 2     | 12.087    | 3247045 | 50.147  |
| Total |           | 6475066 | 100.000 |

PeakTable

**(S)-12f**

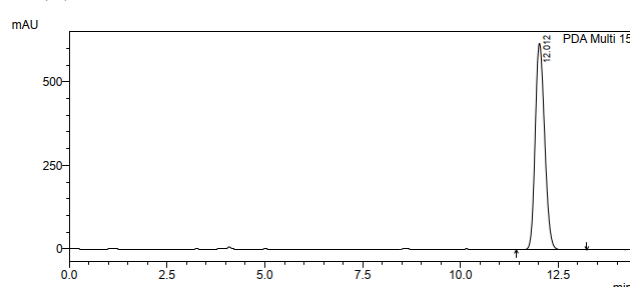

PDA Ch15 254nm 4nm

| Peak# | Ret. Time | Area     | Area %  |
|-------|-----------|----------|---------|
| 1     | 12.012    | 10384974 | 100.000 |
| Total |           | 10384974 | 100.000 |

PeakTable

### (S)-1-Chloro-4-((dibromomethyl)sulfinyl)benzene 12g

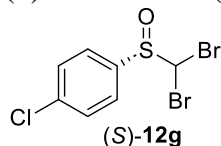

### Methyl (S)-2,2-dibromo-2-((4-chlorophenyl)sulfinyl)acetate 10g

**Yield:** 79%, purified by ISCO flash column chromatography (7:3 hexane:EtOAc v/v).

**<sup>1</sup>H NMR** (400 MHz, CDCl<sub>3</sub>) δ 7.81 - 7.78 (m, 2H), 7.53 - 7.49 (m, 2H), 3.91 (s, 3H).

**<sup>13</sup>C NMR** (101 MHz, CDCl<sub>3</sub>) δ 163.4, 140.1, 137.6, 129.3, 128.9, 73.9, 55.6.

**ESI MS.** C<sub>9</sub>H<sub>8</sub>Br<sub>2</sub>ClOS m/z [M+H]<sup>+</sup> calc. 390.8, found 390.9.

### (S)-1-Chloro-4-((dibromomethyl)sulfinyl)benzene 12g

**Yield:** 35%, purified by ISCO flash column chromatography (4:1 hexane:EtOAc v/v).

**<sup>1</sup>H NMR** (600 MHz, CDCl<sub>3</sub>) δ 7.78 - 7.75 (m, 2H), 7.56 - 7.54 (m, 2H), 6.17 (s, 1H).

**<sup>13</sup>C NMR** (151 MHz, CDCl<sub>3</sub>) δ 139.8, 137.2, 129.3, 128.4, 57.4.

**ESI MS.** C<sub>7</sub>H<sub>6</sub>Br<sub>2</sub>ClOS m/z [M+H]<sup>+</sup> calc. 332.8, found 332.8.

**[α]<sup>25</sup><sub>D</sub>** +30.46 (c 0.24, CH<sub>2</sub>Cl<sub>2</sub>).

**Chiral HPLC** Chiralpak AD-H, 10% IPA/hexanes, 1.0 mL/min, 254nm.

(±)-12g

(S)-12g

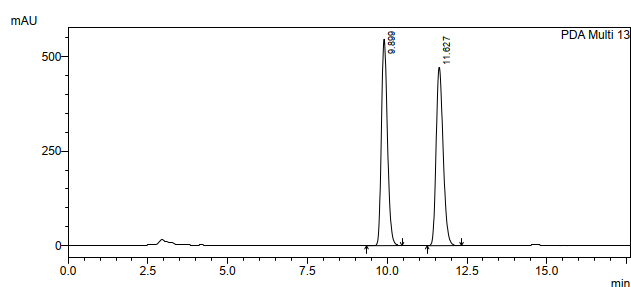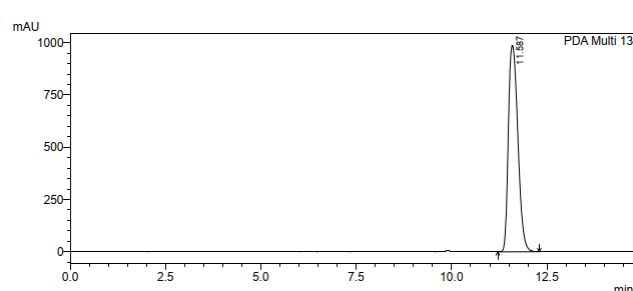

1 PDA Multi 13/254nm 4nm

1 PDA Multi 13/254nm 4nm

PeakTable

| PDA Ch13 254nm 4nm |           |          |         |
|--------------------|-----------|----------|---------|
| Peak#              | Ret. Time | Area     | Area %  |
| 1                  | 9.899     | 7181659  | 49.907  |
| 2                  | 11.627    | 7208512  | 50.093  |
| Total              |           | 14390172 | 100.000 |

PeakTable

| PDA Ch13 254nm 4nm |           |          |         |
|--------------------|-----------|----------|---------|
| Peak#              | Ret. Time | Area     | Area %  |
| 1                  | 11.587    | 17088552 | 100.000 |
| Total              |           | 17088552 | 100.000 |

### XIII. General procedure for decarboxylative tribromination

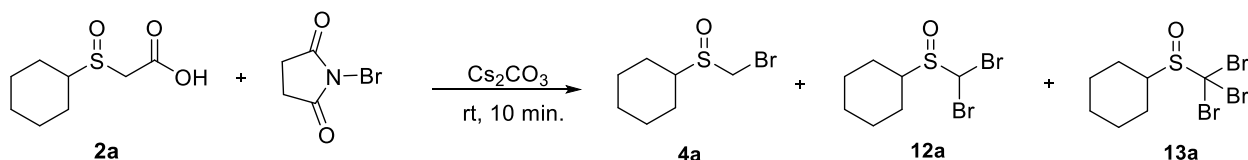

To a solution of the acid **2a** (0.1 mmol, 1.0 equiv) in solvent (Table **S2**, 2.0 mL) was added solid Cs<sub>2</sub>CO<sub>3</sub> (65 mg, 0.2 mmol, 2.0 equiv). N-bromosuccinimide (178 mg, 1.0 mmol, 10 equiv) was added portion wise in the reaction mixture, stirred for 10 min at room temperature and checked LCMS. After the completion of the reaction, the reaction mixture was diluted by addition of EtOAc and water. The aqueous layer was extracted with EtOAc (3 × 10) and the combined organic layer was washed with water and dried over anhydrous Na<sub>2</sub>SO<sub>4</sub>, evaporated under vacuum and purified by ISCO flash chromatography.

**Table S5**

| Entry    | Solvent                | <b>4a<sup>1</sup></b> | <b>12a<sup>1</sup></b> | <b>13a<sup>1</sup></b> |
|----------|------------------------|-----------------------|------------------------|------------------------|
| 1        | DMF <sup>a</sup>       | 21                    | 3                      | 1                      |
| 2        | 1,4-Dioxane            | 5                     | 3                      | 1                      |
| 3        | THF                    | 1                     | 2                      | -                      |
| <b>4</b> | <b>DMSO</b>            | <b>1</b>              | <b>-</b>               | <b>12</b>              |
| 5        | CH <sub>3</sub> CN     | 1                     | 1                      | 1                      |
| 6        | MeOH <sup>b</sup>      | 1                     | -                      | -                      |
| 7        | EtOH <sup>b</sup>      | 7                     | 1                      | -                      |
| 8        | IPA                    | 6                     | 1                      | 3                      |
| 9        | n-Butanol <sup>c</sup> | 13                    | 1                      | -                      |
| 10       | t-Butanol              | 2                     | 1                      | -                      |
| 11       | Acetone                | -                     | -                      | -                      |
| 12       | CCl <sub>4</sub>       | 2                     | 1                      | 1                      |
| 13       | HMPA                   | 1                     | 1                      | 1                      |
| 14       | Diethyl ether          | 2                     | 2                      | 1                      |
| 15       | Diethylene glycol      | 1                     | 2.5                    | 1.5                    |
| 16       | TFE                    | 1                     | 1                      | -                      |

1: Uncorrected peak areas by LCMS.

a: Ratio of 1a:1b:1c was not consistent

b: Not a clean reaction

c: Racemisation observed

**(S)-((Tribromomethyl)sulfinyl)cyclohexane 13a**

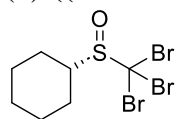

**(S)-13a**

**Yield:** 63%, purified by ISCO flash column chromatography (4:1 hexane:EtOAc v/v).



**<sup>1</sup>H NMR** (400 MHz, CDCl<sub>3</sub>) δ 3.08 - 3.00 (m, 1H), 2.23 - 2.11 (m, 2H), 1.96 - 1.74 (m, 3H), 1.73 - 1.59 (m, 2H), 1.52 - 1.27 (m, 3H).

**<sup>13</sup>C NMR** (101 MHz, CDCl<sub>3</sub>) δ 62.6, 58.5, 30.7, 25.9, 25.4, 25.3, 25.2.

**ESI MS** C<sub>7</sub>H<sub>12</sub>Br<sub>3</sub>OS m/z [M+H]<sup>+</sup> calc. 382.8, found 382.8.

**[α]<sup>25</sup><sub>D</sub>** -25.99 (c 0.10, EtOH).

**Chiral HPLC** Chiralpak AD-H, 5% IPA/hexanes, 1.0 mL/min, 254nm.

(±)-**13a**

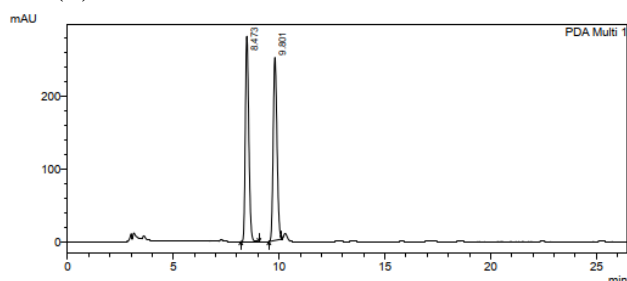

1 PDA Multi 1/254nm 4nm

PeakTable

| Peak# | Ret. Time | Area    | Area %  |
|-------|-----------|---------|---------|
| 1     | 8.473     | 3193922 | 50.491  |
| 2     | 9.801     | 3131751 | 49.509  |
| Total |           | 6325673 | 100.000 |

(S)-**13a**

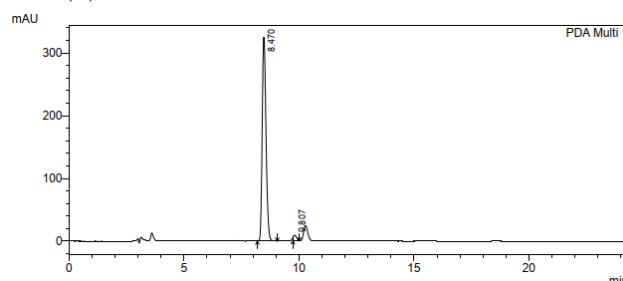

1 PDA Multi 1/254nm 4nm

PeakTable

| Peak# | Ret. Time | Area    | Area %  |
|-------|-----------|---------|---------|
| 1     | 8.470     | 3723885 | 97.750  |
| 2     | 9.807     | 85718   | 2.250   |
| Total |           | 3809603 | 100.000 |

(S)-1-((Tribromomethyl)sulfinyl)hexane **13b**

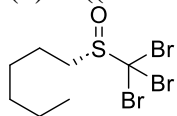

(S)-**13b**

**Yield:** 67%, purified by ISCO flash column chromatography (4:1 hexane:EtOAc v/v).

**<sup>1</sup>H NMR** (400 MHz, CDCl<sub>3</sub>) δ 3.35 - 3.28 (m, 1H), 2.74 - 2.67 (m, 1H), 2.00 - 1.88 (m, 2H), 1.60 - 1.47 (m, 2H), 1.38 - 1.32 (m, 4H), 0.91 (t, *J* = 4.0 Hz, 3H).

**<sup>13</sup>C NMR** (101 MHz, CDCl<sub>3</sub>) δ 57.8, 54.2, 31.4, 28.8, 23.3, 22.5, 14.1.

**ESI MS** C<sub>7</sub>H<sub>14</sub>Br<sub>3</sub>OS m/z [M+H]<sup>+</sup> calc. 384.8, found 384.8.

**[α]<sup>25</sup><sub>D</sub>** -19.99 (c 0.25, EtOH).

**Chiral HPLC** Chiralpak AD-H, 5% IPA/hexanes, 1.0 mL/min, 254nm.

(±)-**13b**

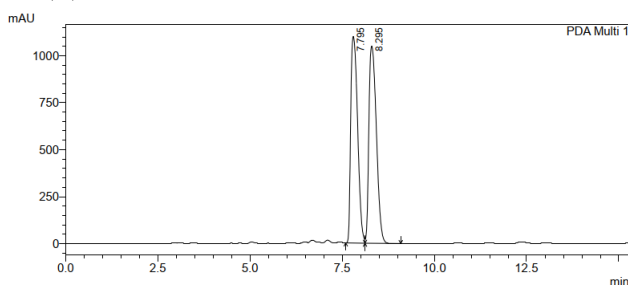

1 PDA Multi 1/254nm 4nm

PeakTable

| Peak# | Ret. Time | Area     | Area %  |
|-------|-----------|----------|---------|
| 1     | 7.795     | 14231983 | 48.941  |
| 2     | 8.295     | 14847811 | 51.059  |
| Total |           | 29079794 | 100.000 |

(S)-**13b**

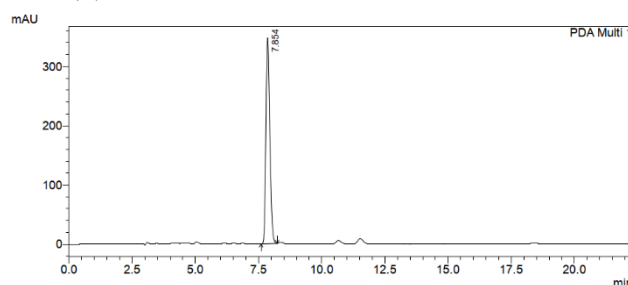

1 PDA Multi 1/254nm 4nm

PeakTable

| Peak# | Ret. Time | Area    | Area %  |
|-------|-----------|---------|---------|
| 1     | 7.854     | 3778755 | 100.000 |
| Total |           | 3778755 | 100.000 |

### (S)-((Tribromomethyl)sulfinyl)benzene 13c

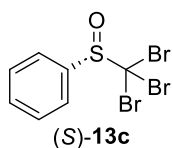

**Yield:** 85%, purified by ISCO flash column chromatography (4:1 hexane:EtOAc v/v).

**<sup>1</sup>H NMR** (400 MHz, CDCl<sub>3</sub>) δ 8.03 - 7.99 (m, 2H), 7.70 - 7.65 (m, 1H), 7.57 - 7.53 (m, 2H).

**<sup>13</sup>C NMR** (101 MHz, CDCl<sub>3</sub>) δ 140.1, 133.8, 128.6, 61.4.

**ESI MS** C<sub>7</sub>H<sub>6</sub>Br<sub>3</sub>OS m/z [M+H]<sup>+</sup> calc. 376.7, found 376.7.

**[α]<sup>25</sup><sub>D</sub>** +17.59 (c 0.25, EtOH).

**Chiral HPLC** Chiralcel OD-H, 20% IPA/hexanes, 1.0 mL/min, 220nm.

(±)-13c

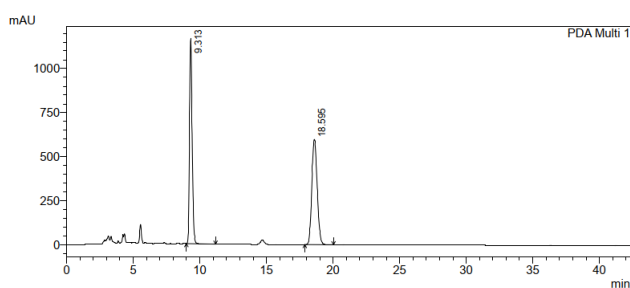

1 PDA Multi 1/220nm 4nm

| PeakTable         |           |          |         |
|-------------------|-----------|----------|---------|
| PDA Ch1 220nm 4nm |           |          |         |
| Peak#             | Ret. Time | Area     | Area %  |
| 1                 | 9.313     | 16179822 | 49.259  |
| 2                 | 18.595    | 16666343 | 50.741  |
| Total             |           | 32846165 | 100.000 |

(S)-13c

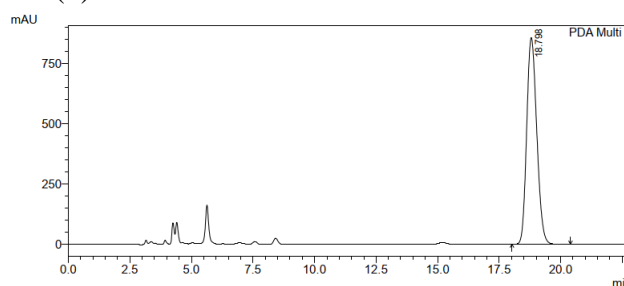

1 PDA Multi 2/220nm 4nm

| PeakTable         |           |          |         |
|-------------------|-----------|----------|---------|
| PDA Ch2 220nm 4nm |           |          |         |
| Peak#             | Ret. Time | Area     | Area %  |
| 1                 | 18.798    | 24307529 | 100.000 |
| Total             |           | 24307529 | 100.000 |

### (S)-1-Methoxy-4-((tribromomethyl)sulfinyl)benzene 13d

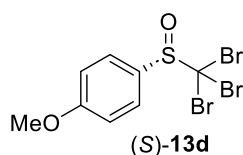

**Yield:** 90%, purified by ISCO flash column chromatography (7:3 hexane:EtOAc v/v).

**<sup>1</sup>H NMR** (600 MHz, CDCl<sub>3</sub>) δ 7.96 - 7.93 (m, 2H), 7.05 - 7.02 (m, 2H), 3.89 (s, 3H).

**<sup>13</sup>C NMR** (151 MHz, CDCl<sub>3</sub>) δ 164.2, 136.1, 130.8, 114.1, 63.4, 55.8.

**ESI MS** C<sub>8</sub>H<sub>8</sub>Br<sub>3</sub>O<sub>2</sub>S m/z [M+H]<sup>+</sup> calc. 406.8, found 407.0.

**[α]<sup>25</sup><sub>D</sub>** +106.38 (c 0.25, EtOH).

**Chiral HPLC** Chiralpak IC, 10% IPA/hexanes, 1.0 mL/min, 254nm.

(±)-13d

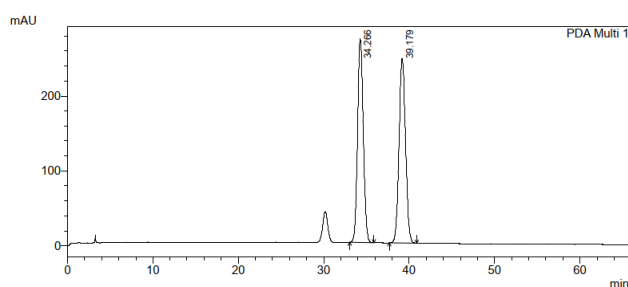

(S)-13d

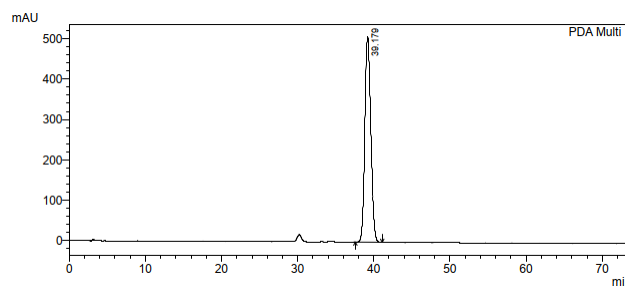

1 PDA Multi 1/254nm 4nm

PeakTable

| Peak# | Ret. Time | Area     | Area %  |
|-------|-----------|----------|---------|
| 1     | 34.266    | 12696477 | 49.249  |
| 2     | 39.179    | 13083902 | 50.751  |
| Total |           | 25780379 | 100.000 |

1 PDA Multi 1/254nm 4nm

PeakTable

| Peak# | Ret. Time | Area     | Area %  |
|-------|-----------|----------|---------|
| 1     | 39.179    | 27752985 | 100.000 |
| Total |           | 27752985 | 100.000 |

**(S)-1-Methyl-4-((tribromomethyl)sulfinyl)benzene 13e**

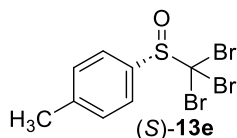

**Yield:** 81%, purified by ISCO flash column chromatography (4:1 hexanes:EtOAc v/v).

**<sup>1</sup>H NMR** (400 MHz, CDCl<sub>3</sub>) δ 7.90 - 7.87 (m, 2H), 7.42 - 7.33 (m, 2H), 2.44 (s, 3H).

**<sup>13</sup>C NMR** (101 MHz, CDCl<sub>3</sub>) δ 144.9, 136.8, 129.3, 128.5, 62.3, 21.9.

**ESI MS** C<sub>8</sub>H<sub>8</sub>Br<sub>3</sub>OS m/z [M+H]<sup>+</sup> calc. 390.8, found 390.8.

**[α]<sub>D</sub><sup>26</sup>** +19.99 (c 0.25, EtOH).

**Chiral HPLC** Chiralpak IC, 10% IPA/hexanes, 1.0 mL/min, 254nm.

(±)-13e

(S)-13e

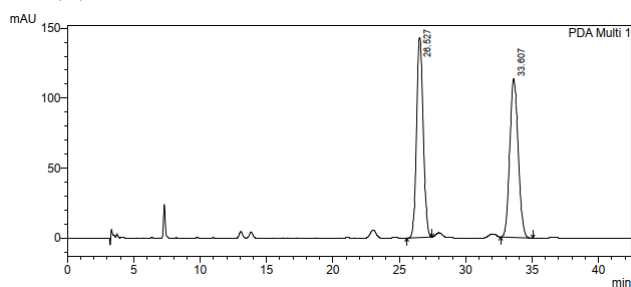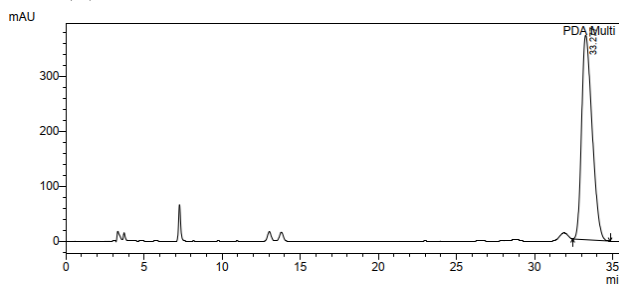

1 PDA Multi 1/254nm 4nm

1 PDA Multi 1/254nm 4nm

PeakTable

| Peak# | Ret. Time | Area    | Area %  |
|-------|-----------|---------|---------|
| 1     | 26.527    | 4980111 | 49.946  |
| 2     | 33.607    | 4990819 | 50.054  |
| Total |           | 9970930 | 100.000 |

PeakTable

| Peak# | Ret. Time | Area     | Area %  |
|-------|-----------|----------|---------|
| 1     | 33.277    | 17380630 | 100.000 |
| Total |           | 17380630 | 100.000 |

**(S)-1-((Tribromomethyl)sulfinyl)-4-(trifluoromethyl)benzene 13f**

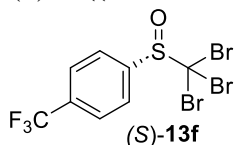

**Yield:** 60%, purified by combi flash column chromatography (7:3 hexanes:EtOAc v/v).

**<sup>1</sup>H NMR** (400 MHz, CDCl<sub>3</sub>) δ 8.17 - 8.15 (m, 2H), 7.88 - 7.81 (m, 2H).

**<sup>13</sup>C NMR** (101 MHz, CDCl<sub>3</sub>) δ 144.1, 135.2 (q), 129.1, 125.6 (q), 124.8 (q), 59.4.

**ESI MS** C<sub>8</sub>H<sub>5</sub>Br<sub>3</sub>F<sub>3</sub>OS m/z [M+H]<sup>+</sup> calc. 444.7, found 444.7.

**[α]<sub>D</sub><sup>25</sup>** +19.19 (c 0.125, EtOH).

**Chiral HPLC** Chiralpak IC, 10% IPA/hexanes, 1.0 mL/min, 254nm.

(±)-13f

(S)-13f

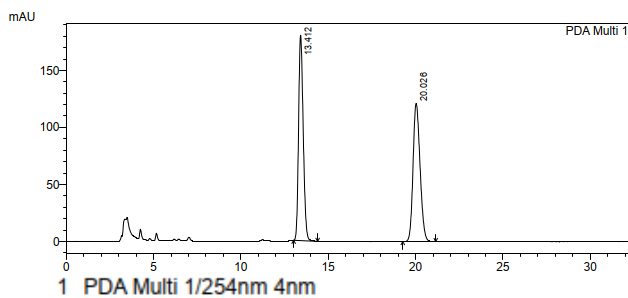

PDA Ch1 254nm 4nm

| Peak# | Ret. Time | Area    | Area %  |
|-------|-----------|---------|---------|
| 1     | 13.412    | 3323936 | 49.589  |
| 2     | 20.026    | 3378995 | 50.411  |
| Total |           | 6702930 | 100.000 |

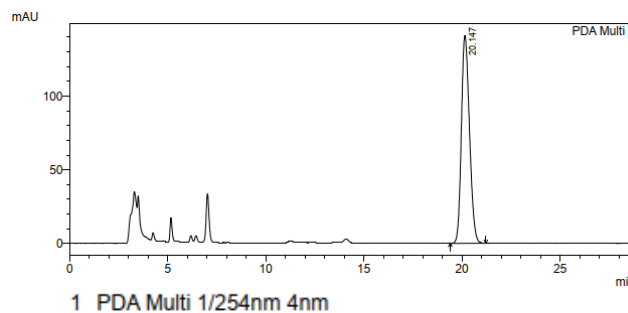

PDA Ch1 254nm 4nm

| Peak# | Ret. Time | Area    | Area %  |
|-------|-----------|---------|---------|
| 1     | 20.147    | 4040017 | 100.000 |
| Total |           | 4040017 | 100.000 |

### (S)-1-Chloro-4-((tribromomethyl)sulfinyl)benzene **13g**

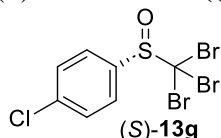

**Yield:** 65%, purified by ISCO flash column chromatography (7:3 hexanes:EtOAc v/v).

<sup>1</sup>H NMR (400 MHz, CDCl<sub>3</sub>) δ 7.95 (d, *J* = 8.0 Hz, 2H), 7.53 (d, *J* = 8.0 Hz, 2H).

<sup>13</sup>C NMR (101 MHz, CDCl<sub>3</sub>) δ 140.5, 138.4, 129.8, 128.9, 60.9.

ESI MS C<sub>6</sub>H<sub>5</sub>ClOS m/z [M+H]<sup>+</sup> calc. 410.7, found 410.7.

[α]<sup>25</sup><sub>D</sub> +19.63 (c 0.275, EtOH).

**Chiral HPLC** Chiralpak IC, 10% IPA/hexanes, 1.0 mL/min, 229nm.

(±)-**13g**

(S)-**13g**

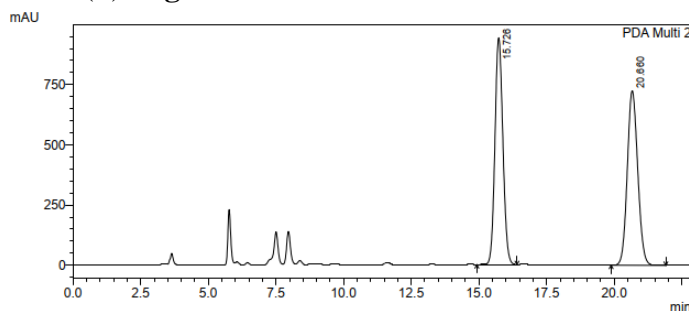

1 PDA Multi 2/229nm 4nm

PDA Ch2 229nm 4nm

| Peak# | Ret. Time | Area     | Area %  |
|-------|-----------|----------|---------|
| 1     | 15.726    | 19271228 | 49.738  |
| 2     | 20.660    | 19474457 | 50.262  |
| Total |           | 38745685 | 100.000 |

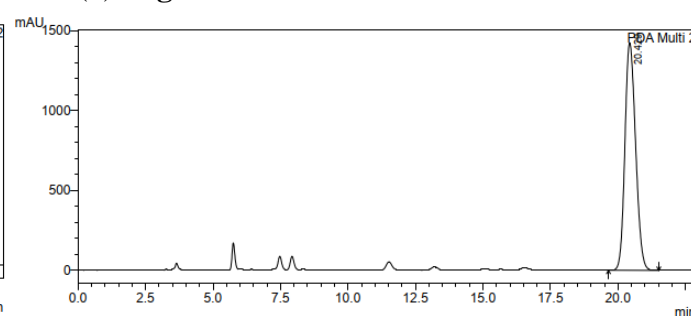

1 PDA Multi 2/229nm 4nm

PDA Ch2 229nm 4nm

| Peak# | Ret. Time | Area     | Area %  |
|-------|-----------|----------|---------|
| 1     | 20.429    | 39261407 | 100.000 |
| Total |           | 39261407 | 100.000 |

## XIV. General procedure for the Coupling of N-(acyloxy)Phthalimides and Aryl Iodides

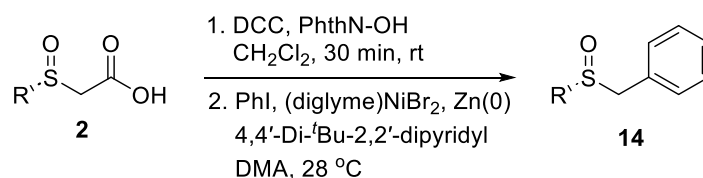

To a solution of carboxylic acid **2** (0.15 mmol, 1.0 equiv) and NHPI (26 mg, 0.16 mmol, 1.2 equiv) in anhydrous CH<sub>2</sub>Cl<sub>2</sub> (1.0 mL) was added DCC (33mg, 0.16 mmol, 1.2 equiv). The reaction was monitored by LCMS (typical time was 30 min). After consumption of all starting material, the solvent was removed on a rotary evaporator at 35 °C under reduced pressure and dried on a high-vacuum line for at least 5 minutes to remove residue of CH<sub>2</sub>Cl<sub>2</sub>. The resulting crude was used for the next reaction.

The catalyst (dtbbpy)NiBr<sub>2</sub> was generated by pre-stirring of NiBr<sub>2</sub>(diglyme) (5.0 mg, 0.014 mmol) and 4-4'-di-tert-butyl-2,2'-bipyridine (4.0 mg, 0.014 mmol) in DMA (0.2 mL) for ~10 min.

Reactions were set up in a nitrogen filled glove box. To an oven-dried 1-dram vial fitted with a Teflon-coated stir-bar was added above prestirred (dtbbpy)NiBr<sub>2</sub> (14 mol%, 0.2 mL), N-(acyloxy)phthalimide (0.15 mmol, 1.5 equiv), aryl iodide (11 μL, 0.1 mmol, 1.0 equiv), zinc powder (13mg, 0.2 mmol, 2.0 equiv), and DMA (0.4 mL). The vial was capped and removed from the glove box, and heated in a reaction block set to 28 °C on the benchtop with stirring until the reaction was complete as monitored by LCMS. Upon reaction completion the reaction mixture was filtered through a short plug of silica gel to remove metal salts and eluted with diethyl ether. DMA was removed by adding water to the organic layer and extracting the aqueous layer with diethyl ether (3 × 10 mL). The combined organic layers were dried over Na<sub>2</sub>SO<sub>4</sub>, filtered, and concentrated under reduced pressure. The resulting residue was purified by ISCO flash chromatography to afford the pure product **14**.

#### (S)-((Hexylsulfinyl)methyl)benzene **14b**

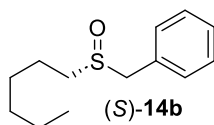

**Yield:** 68%, purified by ISCO flash column chromatography (4:1 hexanes:EtOAc v/v).

**<sup>1</sup>H NMR** (400 MHz, CDCl<sub>3</sub>) δ 7.40 - 7.28 (m, 5H), 4.02 (d, *J* = 12.0 Hz, 1H), 3.93 (d, *J* = 16.0 Hz, 1H), 2.58 - 2.54 (m, 2H), 1.79 - 1.68 (m, 2H), 1.49 - 1.23 (m, 6H), 0.87 (t, *J* = 8.0 Hz, 3H).

**<sup>13</sup>C NMR** (151 MHz, CDCl<sub>3</sub>) δ 130.2, 129.2, 128.5, 58.3, 50.9, 31.5, 28.6, 22.6, 22.5, 14.1.

**ESI MS** C<sub>13</sub>H<sub>21</sub>OS *m/z* [M+H]<sup>+</sup> calc. 225.1, found 225.2.

**[α]<sup>25</sup><sub>D</sub>** +7.99 (c 0.125, EtOH)

**Chiral HPLC** Chiralpak IC, 10% IPA/hexanes, 1.0 mL/min, 229nm.

(±)-**14b**

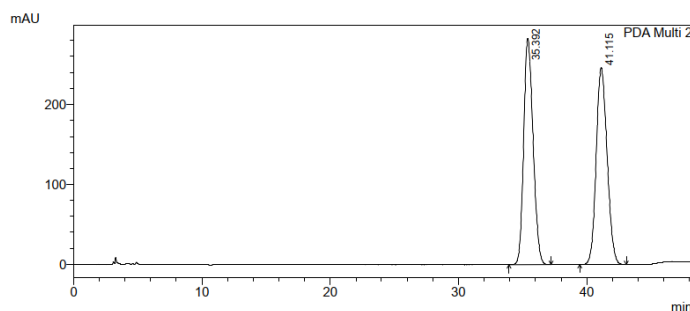

(S)-**14b**

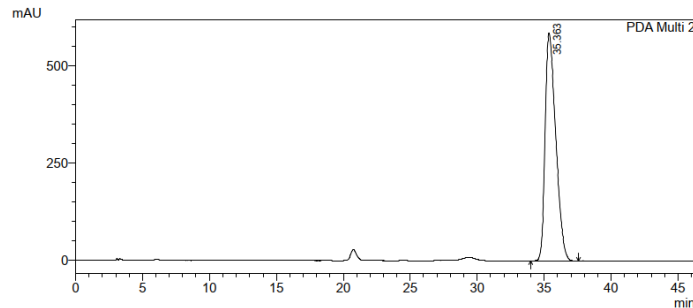

1 PDA Multi 2/229nm 4nm

PeakTable

| PDA Ch2 229nm 4nm |           |          |         |
|-------------------|-----------|----------|---------|
| Peak#             | Ret. Time | Area     | Area %  |
| 1                 | 35.392    | 14469245 | 49.817  |
| 2                 | 41.115    | 14575806 | 50.183  |
| Total             |           | 29045051 | 100.000 |

1 PDA Multi 2/229nm 4nm

PeakTable

| PDA Ch2 229nm 4nm |           |          |         |
|-------------------|-----------|----------|---------|
| Peak#             | Ret. Time | Area     | Area %  |
| 1                 | 35.363    | 32337106 | 100.000 |
| Total             |           | 32337106 | 100.000 |

**(R)-(Benzylsulfinyl)benzene 14c**

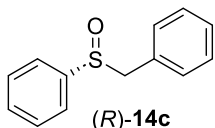

**Yield:** 70%, purified by ISCO flash column chromatography (4:1 hexanes:EtOAc v/v).

**<sup>1</sup>H NMR** (400 MHz, CDCl<sub>3</sub>) δ 7.48 - 7.36 (m, 4H), 7.29 - 7.22 (m, 3H), 7.00 - 6.96 (m, 2H), 4.09 (d, *J* = 12.0 Hz, 1H), 3.99 (d, *J* = 12.0 Hz, 1H).

**<sup>13</sup>C NMR** (101 MHz, CDCl<sub>3</sub>) δ 142.9, 131.3, 130.5, 129.3, 128.9, 128.6, 128.4, 124.6, 63.8.

**ESI MS** C<sub>13</sub>H<sub>13</sub>OS *m/z* [M+H]<sup>+</sup> calc. 217.0, found 217.0.

**[α]<sup>25</sup><sub>D</sub>** +199.95 (c 0.135, EtOH)

**Chiral HPLC** Chiralcel OD-H, 10% IPA/hexanes, 1.0 mL/min, 254nm.

(±)-14c

(R)-14c

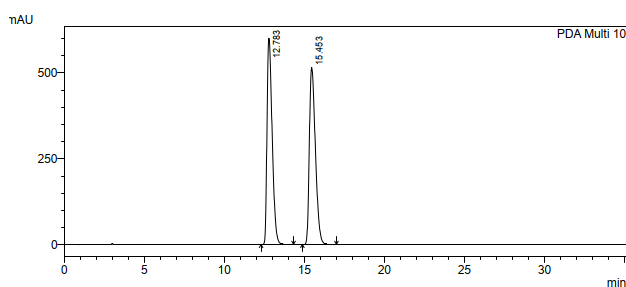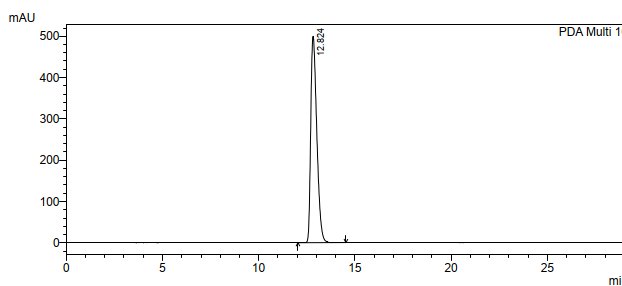

1 PDA Multi 10/254nm 4nm

PeakTable

| PDA Ch10 254nm 4nm |           |          |         |
|--------------------|-----------|----------|---------|
| Peak#              | Ret. Time | Area     | Area %  |
| 1                  | 12.783    | 13396725 | 49.819  |
| 2                  | 15.453    | 13493806 | 50.181  |
| Total              |           | 26890531 | 100.000 |

1 PDA Multi 10/254nm 4nm

PeakTable

| PDA Ch10 254nm 4nm |           |          |         |
|--------------------|-----------|----------|---------|
| Peak#              | Ret. Time | Area     | Area %  |
| 1                  | 12.824    | 10936443 | 100.000 |
| Total              |           | 10936443 | 100.000 |

**(R)-1-(Benzylsulfinyl)-4-methoxybenzene 14d**

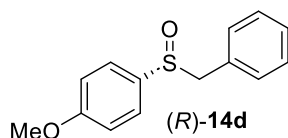

**Yield:** 71%, purified by ISCO flash column chromatography (3:2 hexanes:EtOAc v/v)..

**<sup>1</sup>H NMR** (600 MHz, CDCl<sub>3</sub>) δ 7.34 - 7.26 (m, 5H), 7.01 - 6.99 (m, 2H), 6.96 - 6.93 (m, 2H), 4.14 (d, *J* = 12.0 Hz, 1H), 3.98 (d, *J* = 12.0 Hz, 1H), 3.86 (s, 3H).

**<sup>13</sup>C NMR** (151 MHz, CDCl<sub>3</sub>) δ 162.2, 133.6, 130.5, 129.4, 128.6, 128.3, 126.5, 114.5, 63.8, 55.6.

**ESI MS** C<sub>14</sub>H<sub>15</sub>O<sub>2</sub>S *m/z* [M+H]<sup>+</sup> calc. 247.1, found 247.1

**[α]<sup>25</sup><sub>D</sub>** +155.96 (c 0.25, EtOH)

**Chiral HPLC** Chiralcel OD-H, 10% IPA/hexanes, 1.0 mL/min, 254nm.

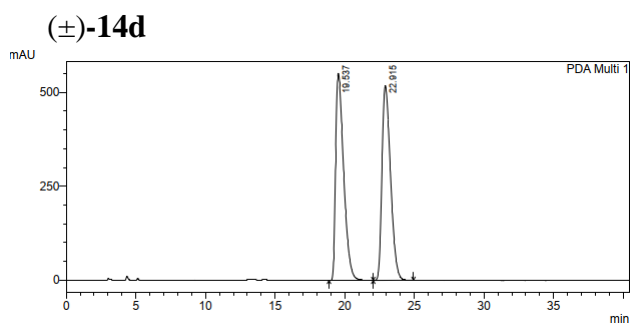

1 PDA Multi 1/254nm 4nm

PeakTable

| Peak# | Ret. Time | Area     | Area %  |
|-------|-----------|----------|---------|
| 1     | 19.537    | 22207029 | 49.989  |
| 2     | 22.915    | 22217029 | 50.011  |
| Total |           | 44424058 | 100.000 |

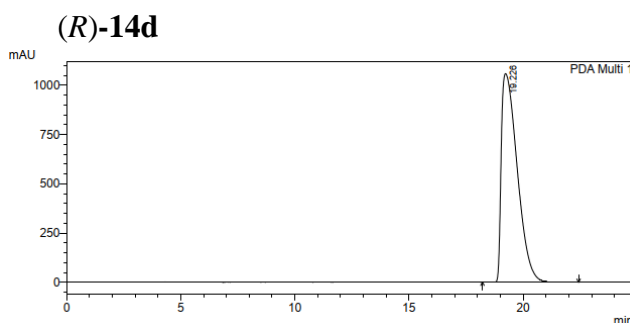

1 PDA Multi 1/254nm 4nm

PeakTable

| Peak# | Ret. Time | Area     | Area %  |
|-------|-----------|----------|---------|
| 1     | 19.226    | 51518941 | 100.000 |
| Total |           | 51518941 | 100.000 |

**(R)-1-(Benzylsulfinyl)-4-methylbenzene 14e**

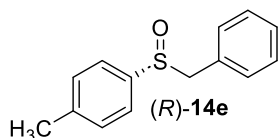

**Yield:** 67%, purified by ISCO flash column chromatography (4:1 hexanes:EtOAc v/v).

**<sup>1</sup>H NMR** (600 MHz, CDCl<sub>3</sub>) δ 7.33 - 7.24 (m, 7H), 7.03 - 7.01 (m, 2H), 4.12 (d, *J* = 18.0 Hz, 1H), 3.99 (d, *J* = 12.0 Hz, 1H), 2.42 (s, 3H).

**<sup>13</sup>C NMR** (151 MHz, CDCl<sub>3</sub>) δ 141.8, 139.7, 130.5, 129.7, 129.5, 128.6, 128.3, 124.6, 63.8, 21.6.

**ESI MS** C<sub>14</sub>H<sub>15</sub>OS *m/z* [M+H]<sup>+</sup> calc. 231.1, found 231.0

**[α]<sup>25</sup><sub>D</sub>** +193.55 (c 0.25, EtOH)

**Chiral HPLC** Chiralpak AD-H, 10% IPA/hexanes, 1.0 mL/min, 254nm.

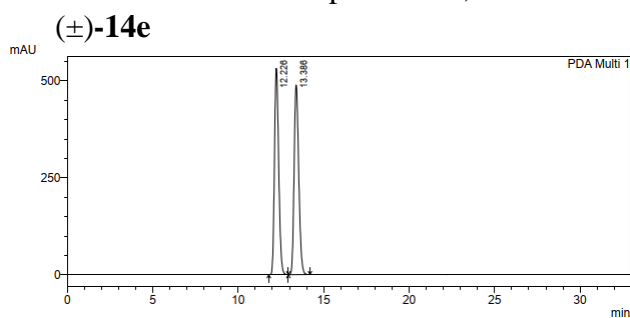

1 PDA Multi 1/254nm 4nm

PeakTable

| Peak# | Ret. Time | Area     | Area %  |
|-------|-----------|----------|---------|
| 1     | 12.226    | 9156602  | 49.857  |
| 2     | 13.386    | 9209275  | 50.143  |
| Total |           | 18365877 | 100.000 |

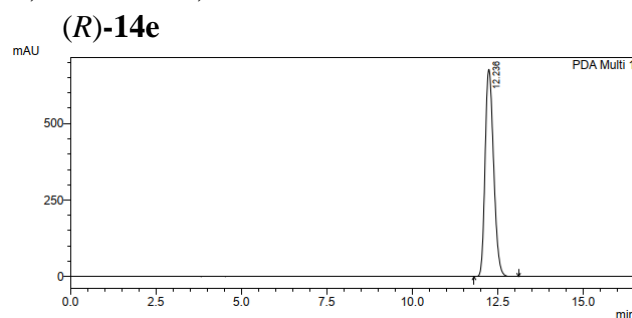

1 PDA Multi 1/254nm 4nm

PeakTable

| Peak# | Ret. Time | Area     | Area %  |
|-------|-----------|----------|---------|
| 1     | 12.236    | 11713550 | 100.000 |
| Total |           | 11713550 | 100.000 |

**(R)-1-(Benzylsulfinyl)-4-(trifluoromethyl)benzene 14f**

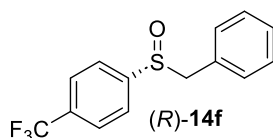

**Yield:** 65%, purified by ISCO flash column chromatography (3:1 hexanes:EtOAc v/v).

**<sup>1</sup>H NMR** (400 MHz, CDCl<sub>3</sub>) δ 7.70 (d, *J* = 8.0 Hz, 2H), 7.48 (d, *J* = 8.0 Hz, 2H), 7.36 - 7.27 (m, 3H), 7.01 - 6.98 (m, 2H), 4.14 (d, *J* = 12.0 Hz, 1H), 4.06 (d, *J* = 12.0 Hz, 1H).

**<sup>13</sup>C NMR** (151 MHz, CDCl<sub>3</sub>) δ 147.3, 133.2 (q), 130.5, 128.8, 128.7, 128.5, 125.9 (q), 125.1, 124.5 (q), 63.5.

**ESI MS** C<sub>14</sub>H<sub>12</sub>F<sub>3</sub>OS *m/z* [M+H]<sup>+</sup> calc. 285.0, found 285.0.

**[α]<sup>25</sup><sub>D</sub>** +208.84 (c 0.09, EtOH)

**Chiral HPLC** Chiralpak IC, 10% IPA/hexanes, 1.0 mL/min, 254nm.

(±)-**14f**

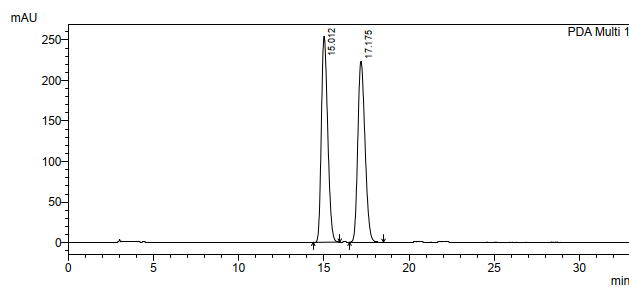

1 PDA Multi 1/254nm 4nm

PDA Ch1 254nm 4nm

PeakTable

| Peak# | Ret. Time | Area     | Area %  |
|-------|-----------|----------|---------|
| 1     | 15.012    | 6566897  | 49.914  |
| 2     | 17.175    | 6589572  | 50.086  |
| Total |           | 13156469 | 100.000 |

(*R*)-**14f**

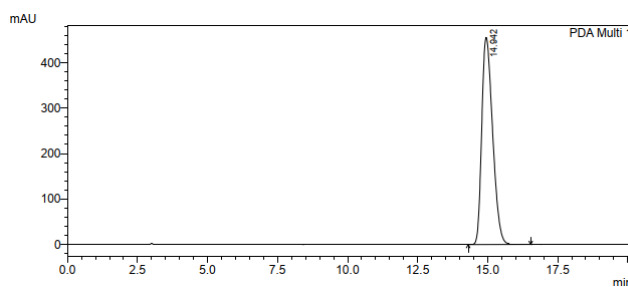

1 PDA Multi 1/254nm 4nm

PDA Ch1 254nm 4nm

PeakTable

| Peak# | Ret. Time | Area     | Area %  |
|-------|-----------|----------|---------|
| 1     | 14.942    | 12294310 | 100.000 |
| Total |           | 12294310 | 100.000 |

(*R*)-**1-(Benzylsulfinyl)-4-chlorobenzene 14g**

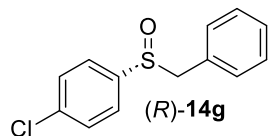

**Yield:** 67%, purified by ISCO flash column chromatography (7:3 hexanes:EtOAc v/v).

**<sup>1</sup>H NMR** (600 MHz, CDCl<sub>3</sub>) δ 7.43 - 7.40 (m, 2H), 7.34 - 7.28 (m, 5H), 7.01 - 6.99 (m, 2H), 4.13 (d, *J* = 12.0 Hz, 1H), 4.01 (d, *J* = 12.0 Hz, 1H).

**<sup>13</sup>C NMR** (151 MHz, CDCl<sub>3</sub>) δ 141.3, 137.5, 130.5, 129.3, 128.7, 128.6, 126.0, 63.6.

**ESI MS** C<sub>13</sub>H<sub>12</sub>ClOS *m/z* [M+H]<sup>+</sup> calc. 251.0, found 251.0.

**[α]<sup>25</sup><sub>D</sub>** +193.29 (c 0.09, EtOH)

**Chiral HPLC** Chiralcel OD-H, 10% IPA/hexanes, 1.0 mL/min, 254nm.

(±)-**14g**

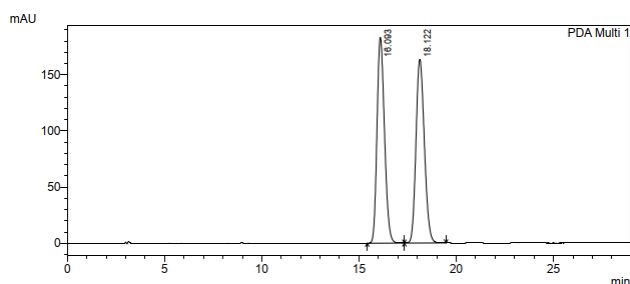

(*R*)-**14g**

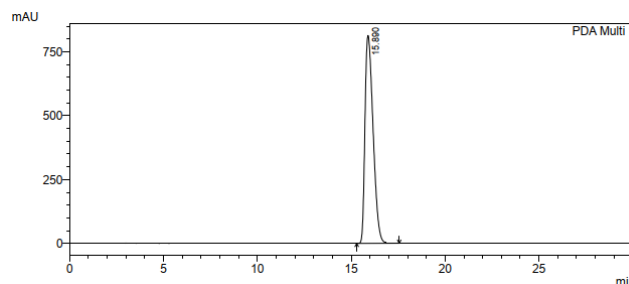



PeakTable

| PDA Ch1 254nm 4nm |           |         |         |
|-------------------|-----------|---------|---------|
| Peak#             | Ret. Time | Area    | Area %  |
| 1                 | 16.093    | 4903027 | 49.986  |
| 2                 | 18.122    | 4905850 | 50.014  |
| Total             |           | 9808877 | 100.000 |

PeakTable

| PDA Ch1 254nm 4nm |           |          |         |
|-------------------|-----------|----------|---------|
| Peak#             | Ret. Time | Area     | Area %  |
| 1                 | 15.890    | 24413170 | 100.000 |
| Total             |           | 24413170 | 100.000 |

## XV Synthesis of sulfoxide inhibitors of 15-prostaglandin dehydrogenase (15-PGDH).

### (E)-3-(1,2-dimethyl-1H-imidazol-5-yl)-1-(thiazol-2-yl)prop-2-en-1-one **17**

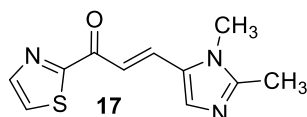

To a solution of 1,2-dimethyl-1H-imidazole-5-carbaldehyde **15** (100 mg, 0.80 mmol, 1.0 equiv) and 1-(thiazol-2-yl)ethan-1-one **16** (102 mg, 0.80 mmol, 1.0 equiv) in EtOH (3 mL) was added piperidine (0.16 mL, 1.61 mmol, 2.0 equiv) at 25°C. The resulting solution was stirred at 90°C for 2 h. After that the solution was concentrated in vacuum to give a residue which was suspended in MTBE, and filtered. The filter cake was washed with MTBE and dried in vacuum to give the crude product. The crude product was again triturated with EtOAc, filtered and the filter cake was dried in vacuum to give the desired product **17** as a yellow solid which was used without additional purification.

**Yield:** 62%.

**<sup>1</sup>H NMR** (400 MHz, DMSO)  $\delta$  8.22 (d,  $J = 4.0$  Hz, 1H), 8.18 (d,  $J = 4.0$  Hz, 1H), 7.83 - 7.65 (m, 3H), 3.67 (s, 3H), 2.38 (s, 3H).

**<sup>13</sup>C NMR** (101 MHz, DMSO)  $\delta$  180.5, 168.1, 150.2, 145.1, 133.5, 131.4, 129.3, 127.9, 115.4, 30.8, 13.4.

**ESI MS.** C<sub>11</sub>H<sub>12</sub>N<sub>3</sub>OS m/z [M+H]<sup>+</sup> calc. 234.0, found 234.1.

### 2-(((Cyclohexylsulfinyl)methyl)thio)-4-(1,2-dimethyl-1H-imidazol-5-yl)-6-(thiazol-2-yl)nicotinonitrile **19**

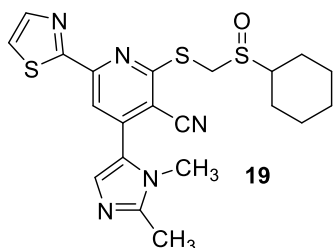

To a solution of compound **17** (25 mg, 0.11 mmol, 1.0 equiv) and 2-cyanoethanethioamide (17 mg, 0.17 mmol, 1.6 equiv) in CH<sub>3</sub>CN (2 mL) was added TEA (29  $\mu$ L, 0.21 mmol, 2.0 equiv) at 25°C and stirred at 80°C for 2 h (the progress of the reaction was monitored by LCMS). The reaction mixture was cooled and TEA (29  $\mu$ L, 0.21 mmol, 2.0 equiv) and ((bromomethyl)sulfinyl)cyclohexane **4a** (26 mg, 0.12 mmol, 1.1 equiv, racemic, (*R*) or (*S*) separately) were added. The resulting mixture was stirred at 80°C for 12 h, then cooled, poured into water and extracted with EtOAc (3  $\times$  10 mL). The combined extracts were dried over anhydrous Na<sub>2</sub>SO<sub>4</sub>, filtered, and concentrated under reduced pressure to give the crude product

which was purified by ISCO flash column chromatography to give the desired product **19** as a brown solid.

**Yield:** 46-51%, purified by ISCO flash column chromatography (49:1 DCM:MeOH v/v).

**<sup>1</sup>H NMR** (400 MHz, MeOD)  $\delta$  8.04 (d,  $J = 4.0$  Hz, 1H), 8.00 (s, 1H), 7.89 (d,  $J = 4.0$  Hz, 1H), 7.41 (s, 1H), 4.95 (d,  $J = 16.0$  Hz, 1H), 4.62 (d,  $J = 12.0$  Hz, 1H), 3.69 (s, 3H), 2.97 (tt,  $J = 12.0, 4.0$  Hz, 1H), 2.50 (s, 3H), 2.18 - 2.10 (m, 1H), 2.10 - 2.01 (m, 1H), 1.99 - 1.85 (m, 2H), 1.77 - 1.72 (m, 1H), 1.66 - 1.53 (m, 2H), 1.52 - 1.39 (m, 2H), 1.36 - 1.22 (m, 1H).

**<sup>13</sup>C NMR** (101 MHz, MeOD)  $\delta$  167.7, 162.4, 153.5, 151.3, 146.2, 144.7, 131.2, 128.5, 125.7, 116.2, 115.7, 106.8, 59.7, 54.8, 47.8, 32.7, 28.3, 26.6, 26.1, 24.9, 13.2.

**ESI MS:** C<sub>21</sub>H<sub>24</sub>N<sub>5</sub>OS<sub>3</sub> m/z [M+H]<sup>+</sup> calc. 458.1, found 458.2.

## 2-(Cyclohexyl sulfinyl)-4-(1,2-dimethyl-1H-imidazol-5-yl)-6-(thiazol-2-yl) thieno[2,3-b]pyridin-3-amine **20**

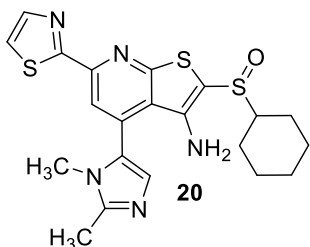

To a solution of sulfoxide derivative **19** (26 mg, 0.05 mmol) in DMF (1 mL) and MeOH (0.5 mL) was added KOH (4 mg, 0.68 mmol, in 20  $\mu$ L water) at 25°C, the resulting solution was stirred at 25°C for 20 min (the progress of the reaction was monitored by TLC). Then the reaction mixture was poured into water, and extracted with EtOAc (3  $\times$  10 mL). The combined extracts were dried over anhydrous Na<sub>2</sub>SO<sub>4</sub>, filtered, and concentrated under reduced pressure to give the crude product which was purified by ISCO flash column chromatography to give the product **20** as a yellow solid.

**Yield:** 58-63%, purified by ISCO flash column chromatography (19:1 DCM:MeOH v/v).

**<sup>1</sup>H NMR** (400 MHz, MeOD)  $\delta$  8.03 (s, 1H), 7.96 (d,  $J = 4.0$  Hz, 1H), 7.77 (d,  $J = 4.0$  Hz, 1H), 7.15 (s, 1H), 3.45 (s, 3H), 3.17 (tt,  $J = 12.0, 4.0$  Hz, 1H), 2.49 (s, 3H), 2.27 - 2.25 (m, 1H), 1.97 - 1.90 (m, 1H), 1.83 - 1.79 (m, 1H), 1.77 - 1.67 (m, 2H), 1.65 - 1.55 (m, 1H), 1.48 - 1.35 (m, 2H), 1.37 - 1.26 (m, 2H).

**<sup>13</sup>C NMR** (151 MHz, MeOD)  $\delta$  169.1, 163.3, 151.4, 149.5, 145.5, 128.4, 128.2, 125.4, 124.3, 119.8, 64.7, 31.8, 27.8, 26.9, 26.6, 26.2, 26.1, 13.1.

**ESI MS:** C<sub>21</sub>H<sub>24</sub>N<sub>5</sub>OS<sub>3</sub> m/z [M+H]<sup>+</sup> calc. 458.1, found 458.2

**$[\alpha]^{24}_D$**  of (*S*)-**20** -92.36 (c 0.21, EtOH).

**$[\alpha]^{24}_D$**  of (*R*)-**20** +93.50 (c 0.216, EtOH).

**Chiral HPLC** Chiralcel OD-H, 60% IPA/hexanes, 0.7 mL/min, 254nm.

(±)-20

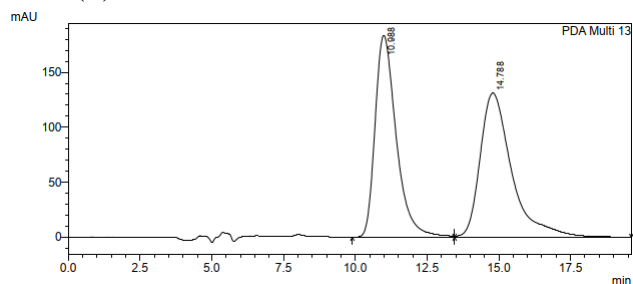

1 PDA Multi 13/254nm 4nm

PeakTable

PDA Ch13 254nm 4nm

| Peak# | Ret. Time | Area     | Area %  |
|-------|-----------|----------|---------|
| 1     | 10.988    | 9439844  | 48.458  |
| 2     | 14.788    | 10040564 | 51.542  |
| Total |           | 19480408 | 100.000 |

(S)-20

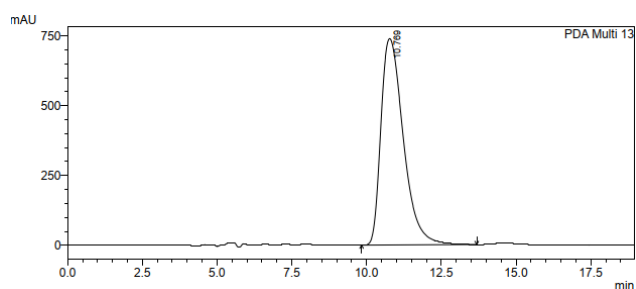

1 PDA Multi 13/254nm 4nm

PeakTable

PDA Ch13 254nm 4nm

| Peak# | Ret. Time | Area     | Area %  |
|-------|-----------|----------|---------|
| 1     | 10.769    | 38617955 | 100.000 |
| Total |           | 38617955 | 100.000 |

(R)-20

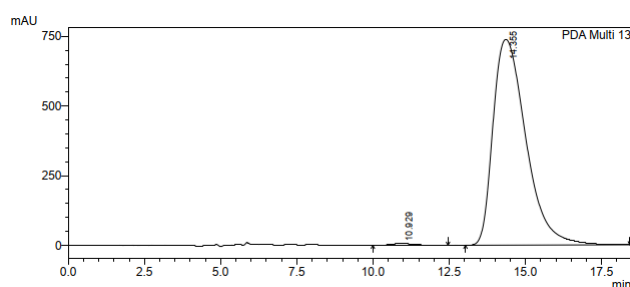

1 PDA Multi 13/254nm 4nm

PeakTable

PDA Ch13 254nm 4nm

| Peak# | Ret. Time | Area     | Area %  |
|-------|-----------|----------|---------|
| 1     | 10.929    | 355596   | 0.637   |
| 2     | 14.355    | 55453810 | 99.363  |
| Total |           | 55809405 | 100.000 |

**IC<sub>50</sub> determination for inhibitors of 15-PGDH.** Assays of 15-PGDH enzyme activity were carried out at 2 nM 15-PGDH, 300 μM NAD<sup>+</sup>, 50 mM Tris-HCl, pH 7.5, 0.01% Tween 20, 0.1 mM DTT and 40 μM PGE2 (Sigma, cat. #P5640). Activity was determined as the rate of NADH generation as determined by fluorescence (Ex/Em=340 nM/485 nM) measured every 15 s for 3.5 min as described previously.<sup>2</sup> The IC<sub>50</sub> values were calculated with GraphPad Prism 7 software (<http://www.graphpad.com/scientific-software/prism/>).

A.

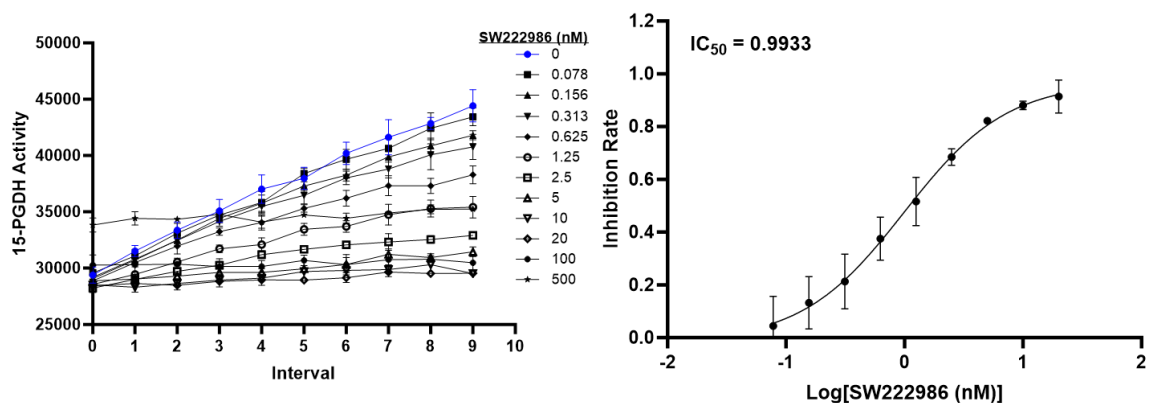

B.

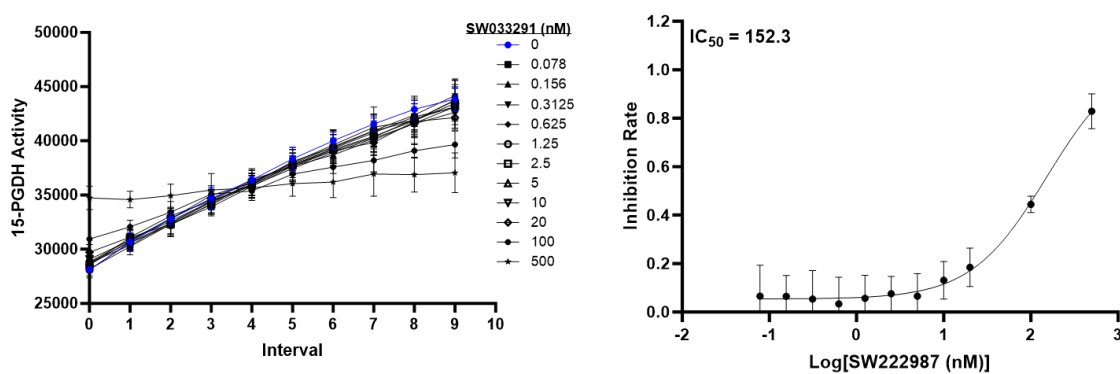

Figure S1. Enzyme activity and processed data for inhibition of 15-PGDH by A) (*R*)-**20** (aka SW222986) and B) (*S*)-**20** (aka SW222987).

1. K. Burgess, I. Henderson, *Tetrahedron Lett.* **1989**, *30*, 3633-3636.
2. M. I. Antczak, Y. Zhang, C. Wang, J. Doran, J. Naidoo, S. Voruganti, N. S. Williams, S. D. Markowitz, J. M. Ready, *J. Med. Chem.* **2017**, *60*, 3979-4001

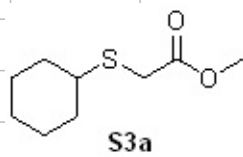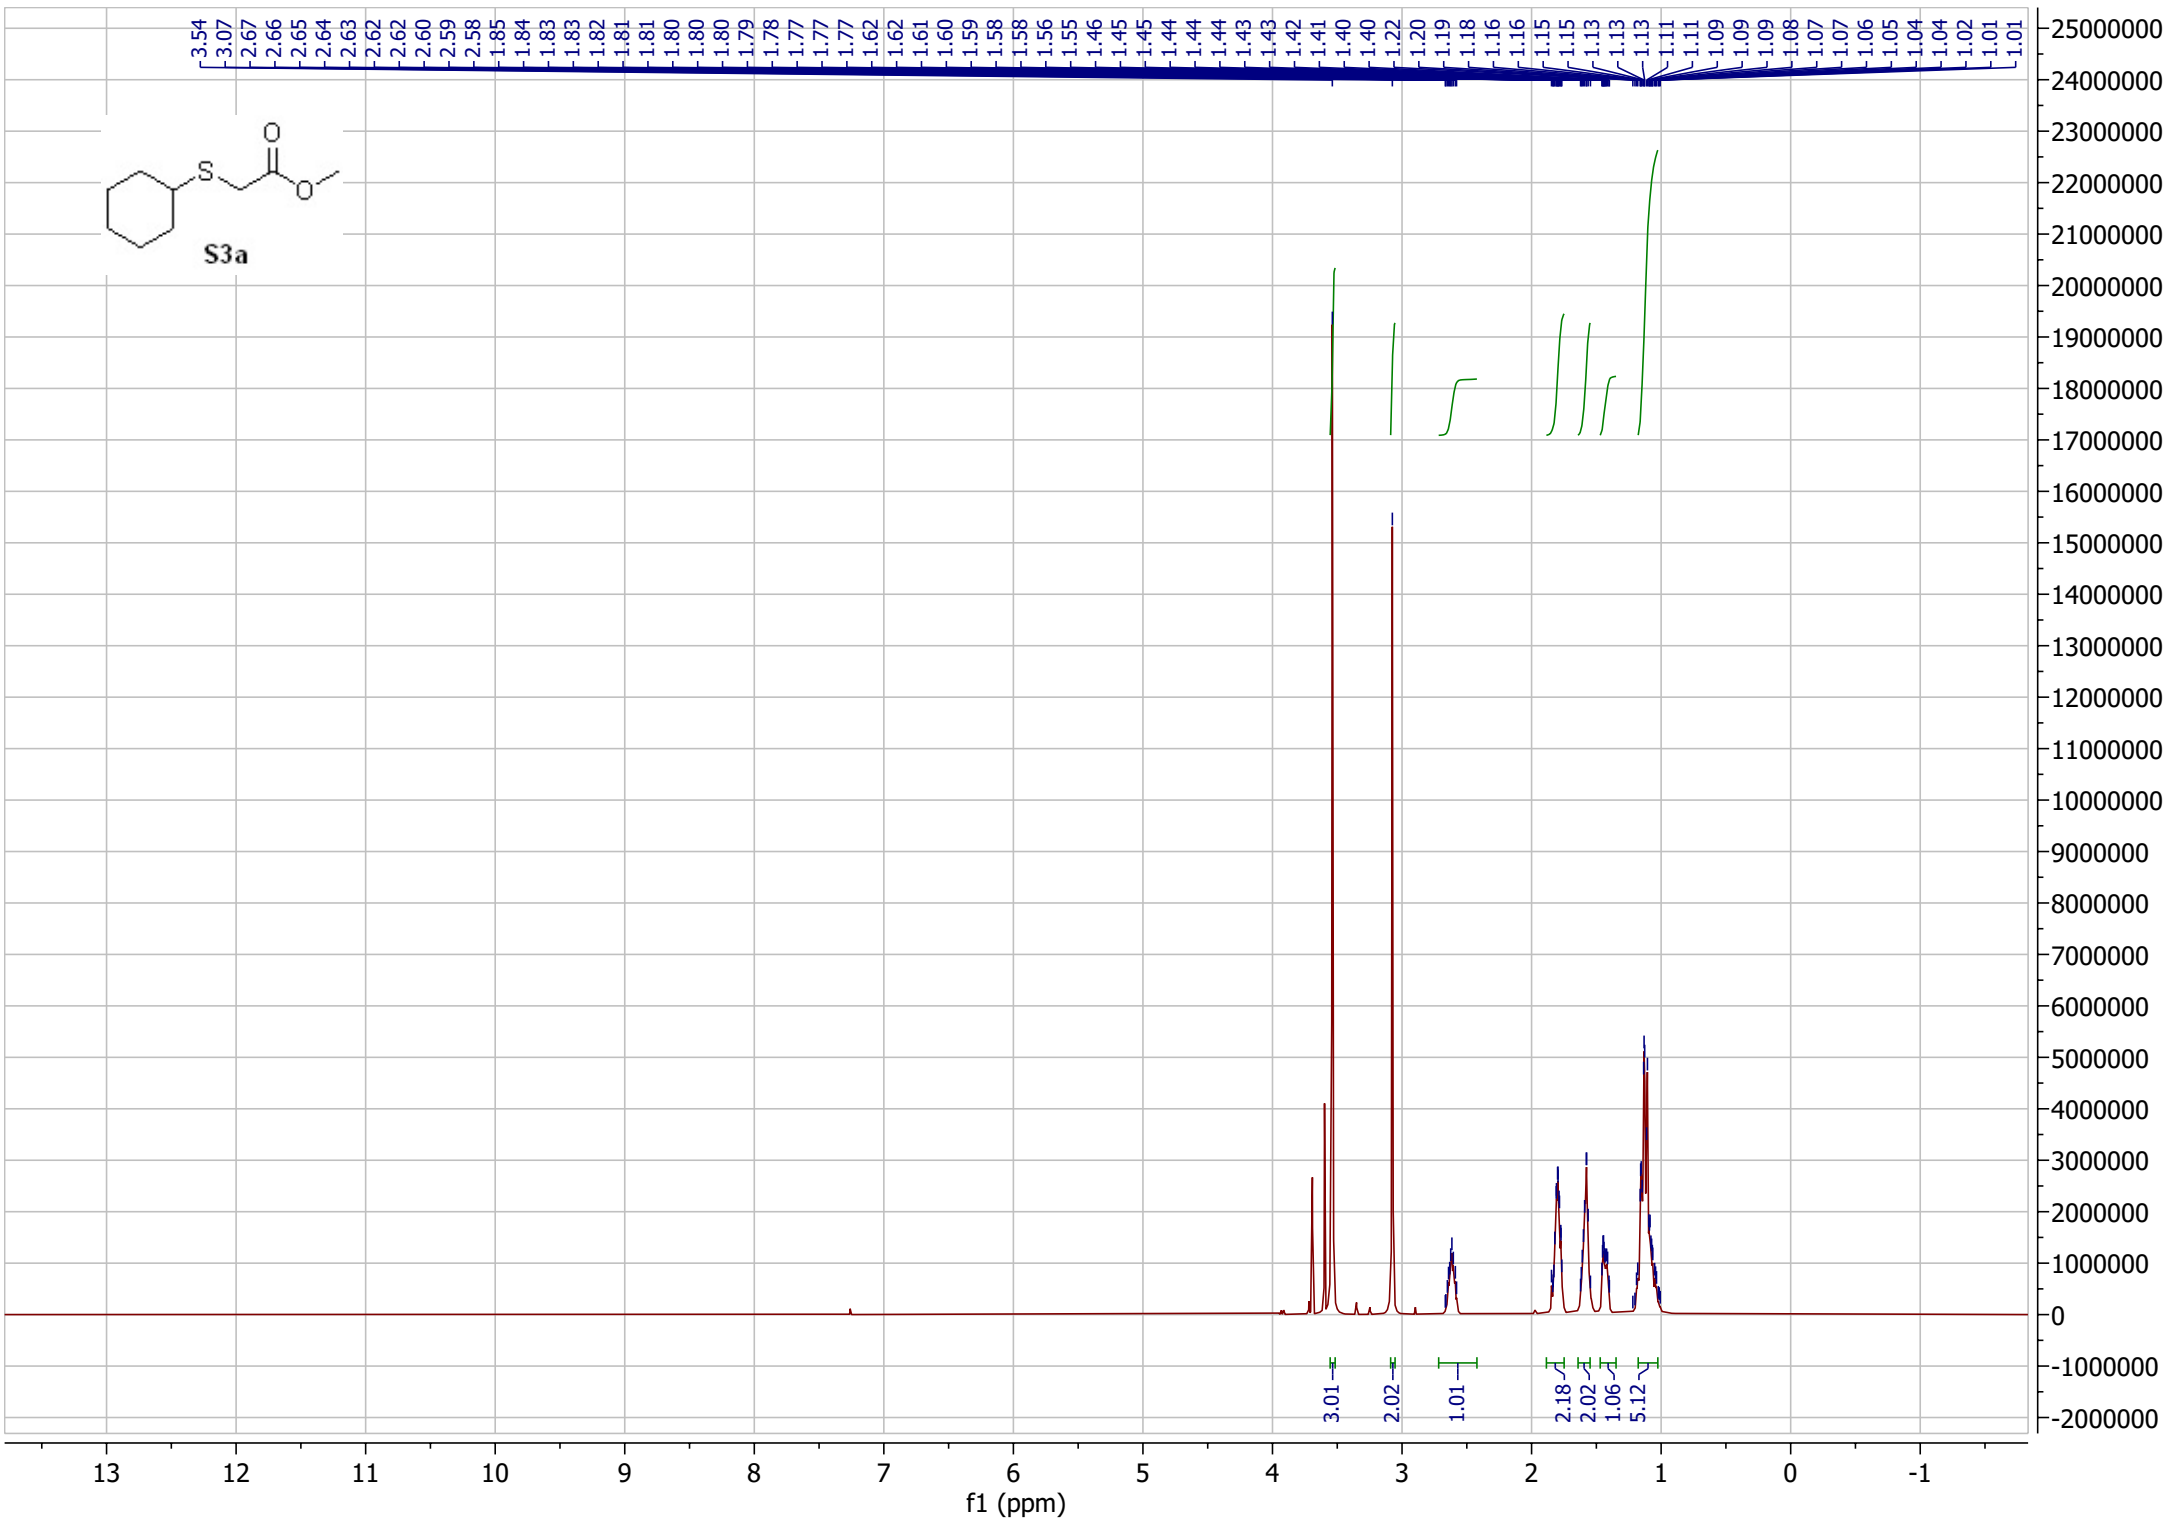

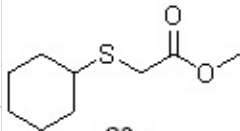

S3a

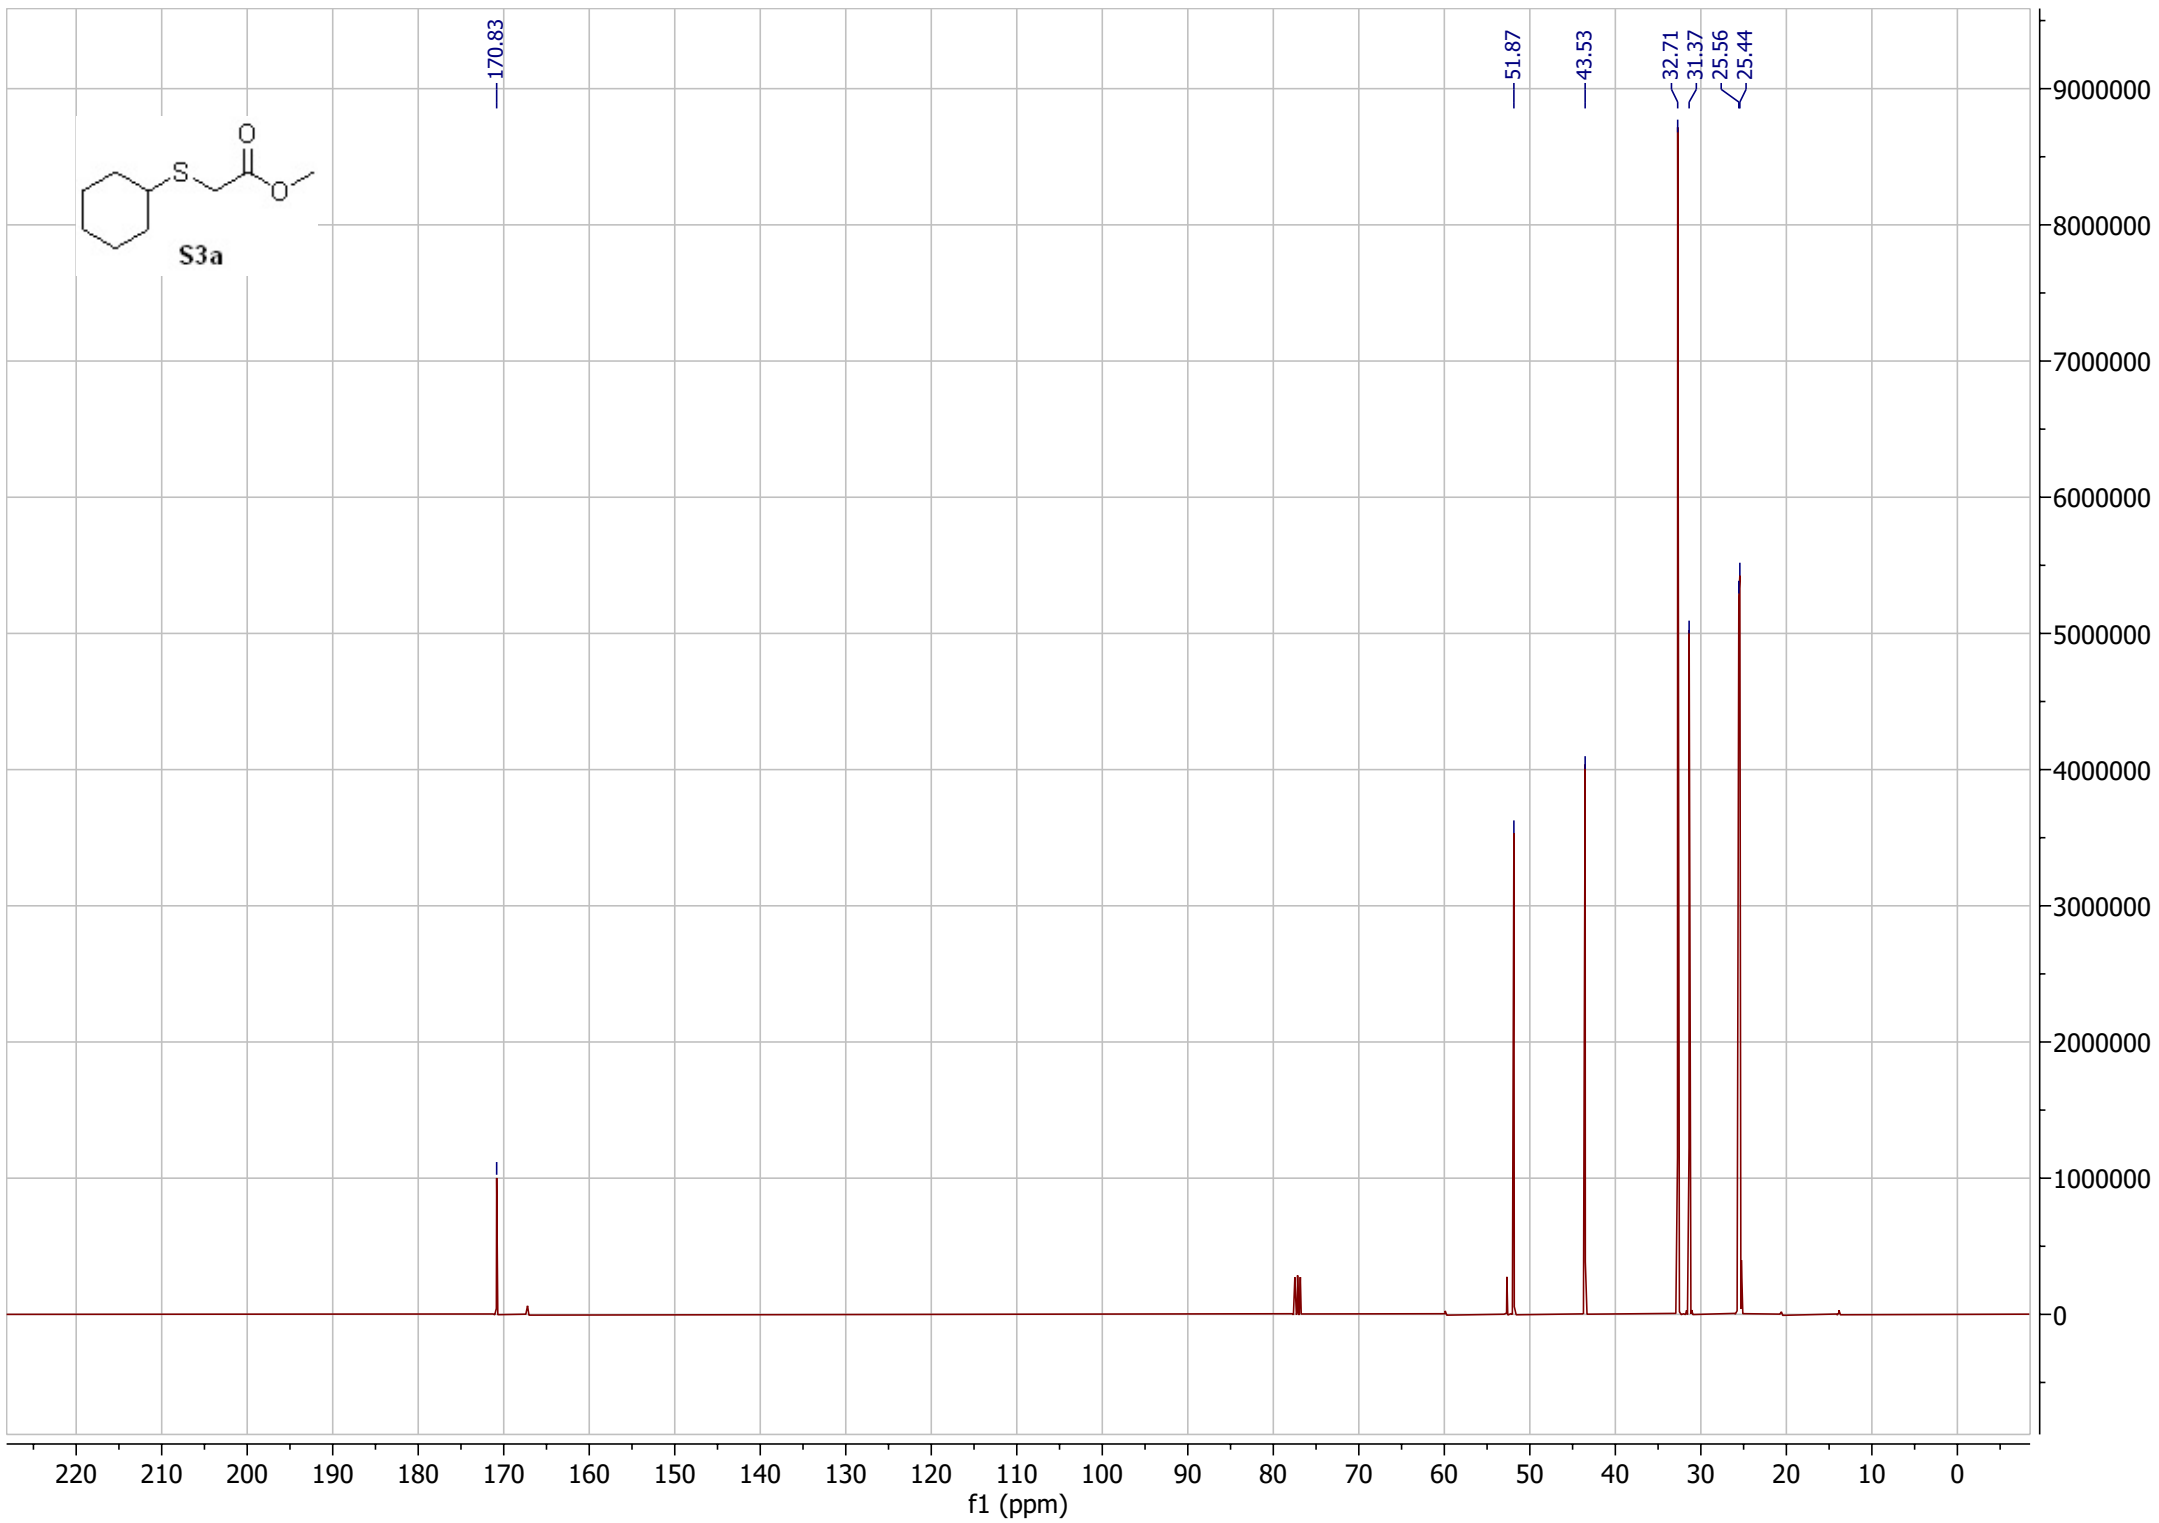

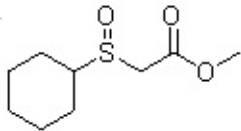

(+)-1a

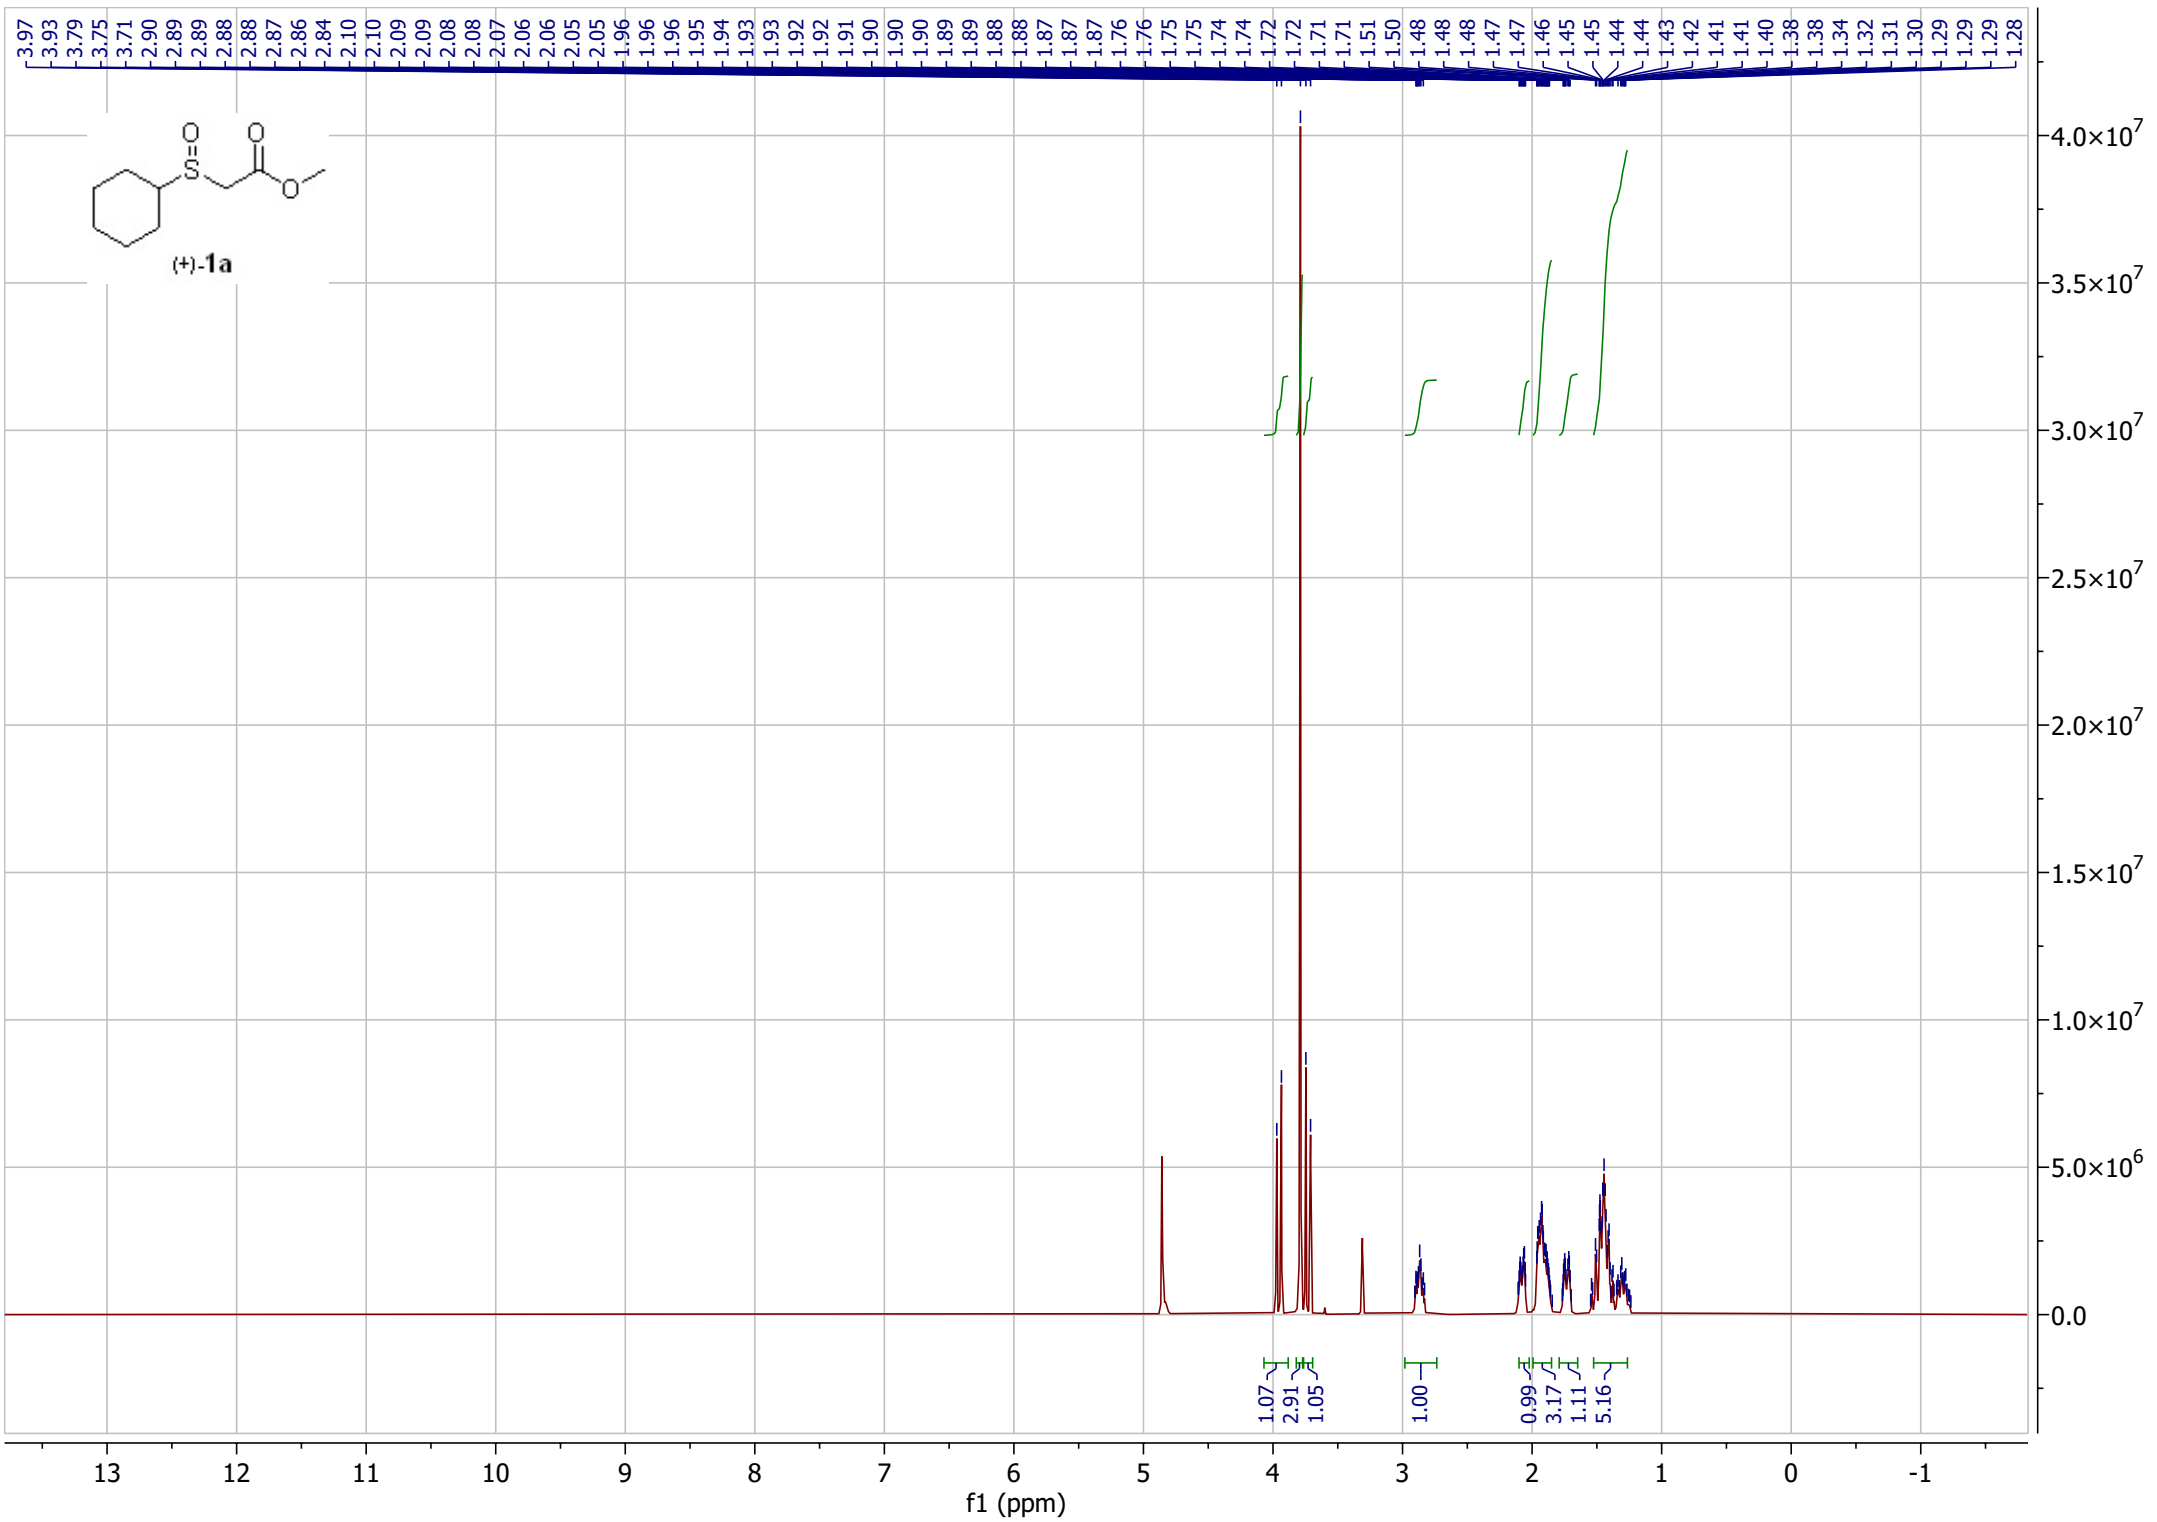

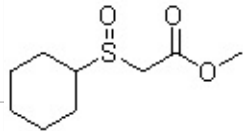

(+)-**1a**

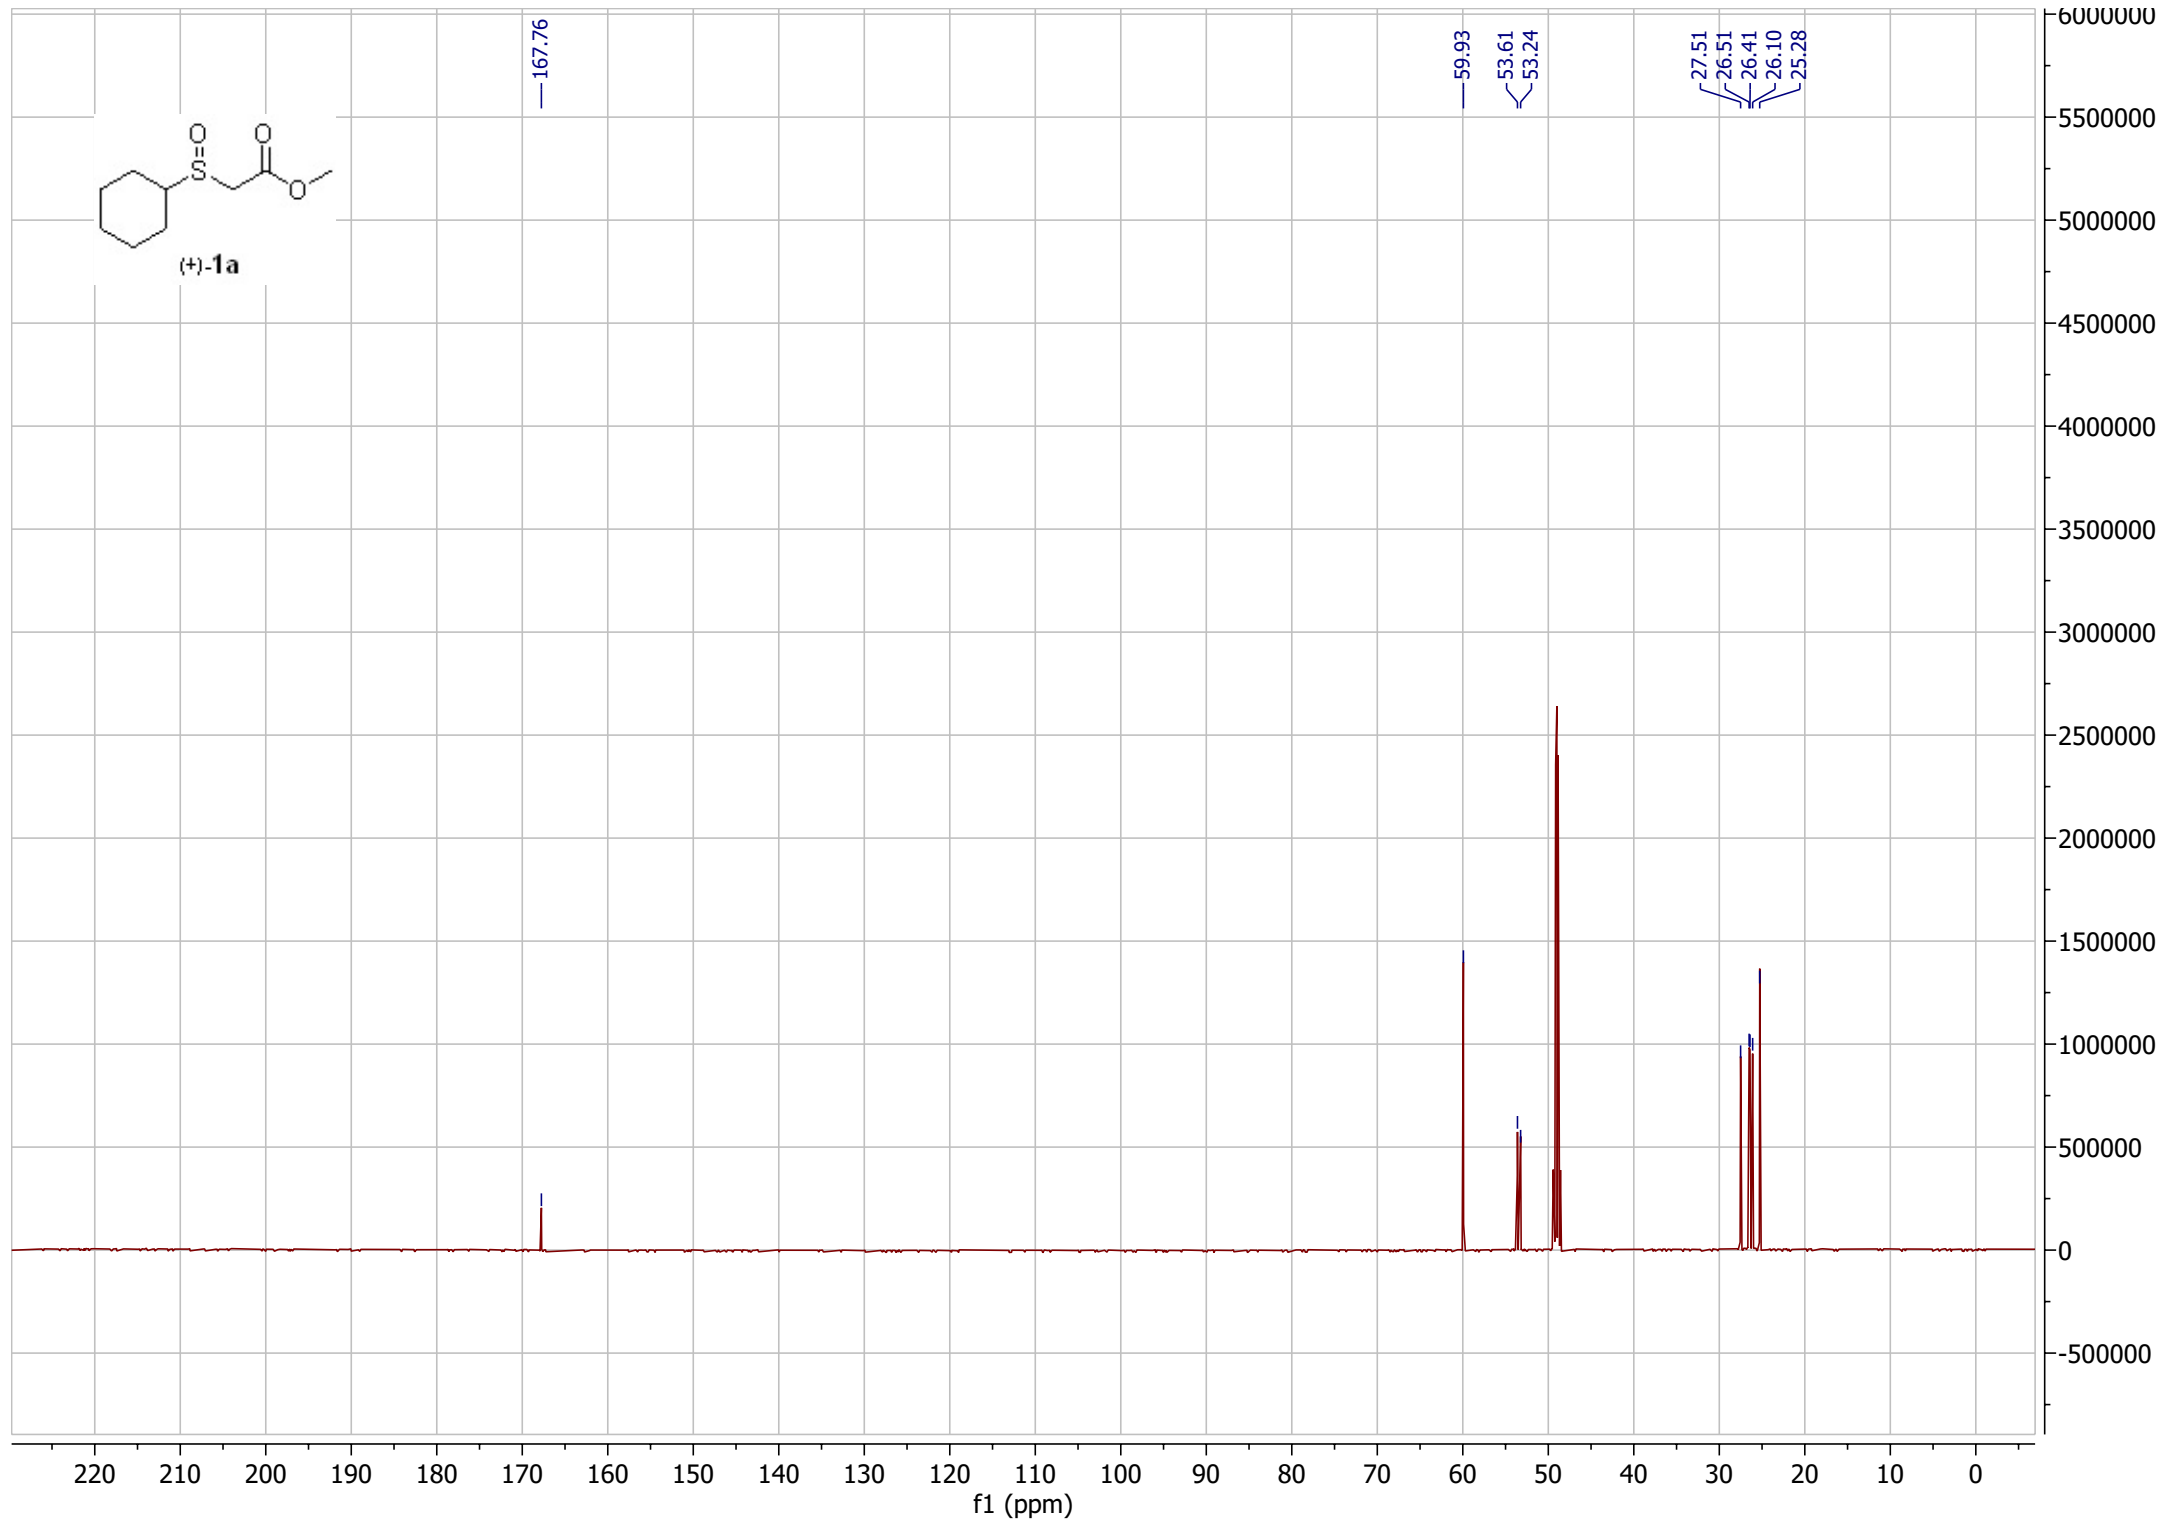



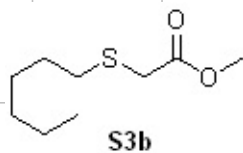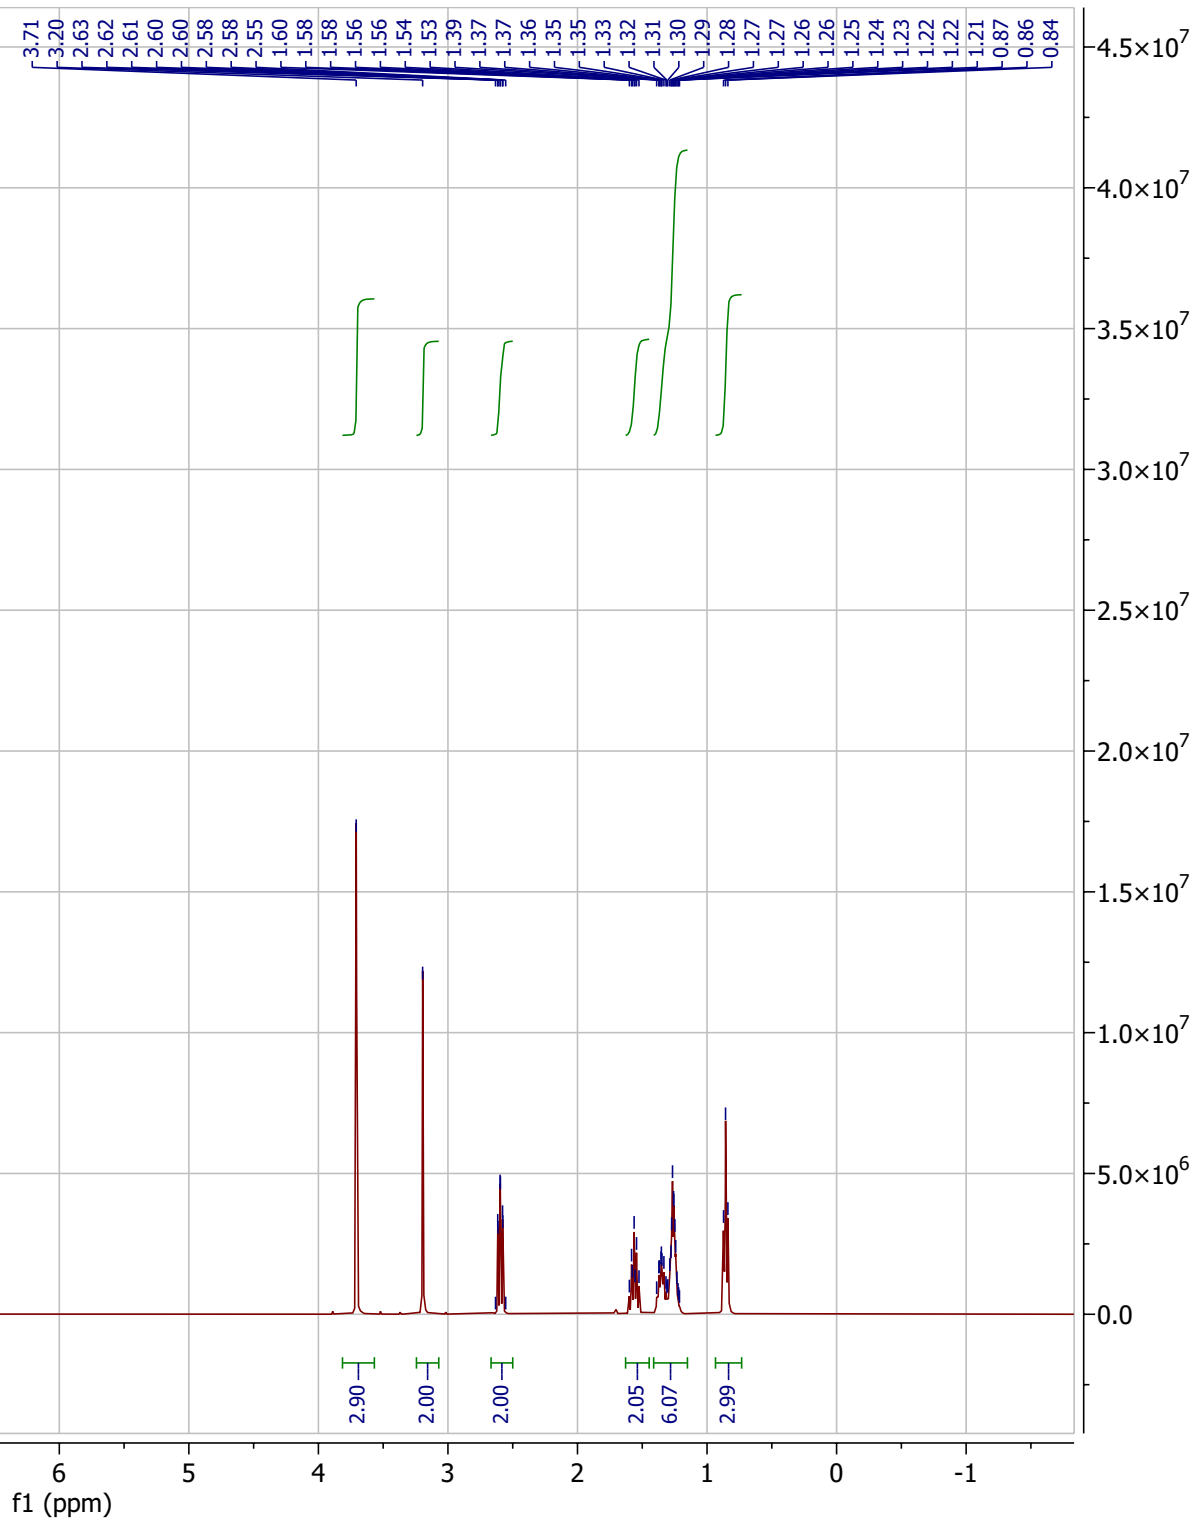

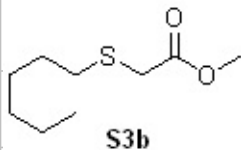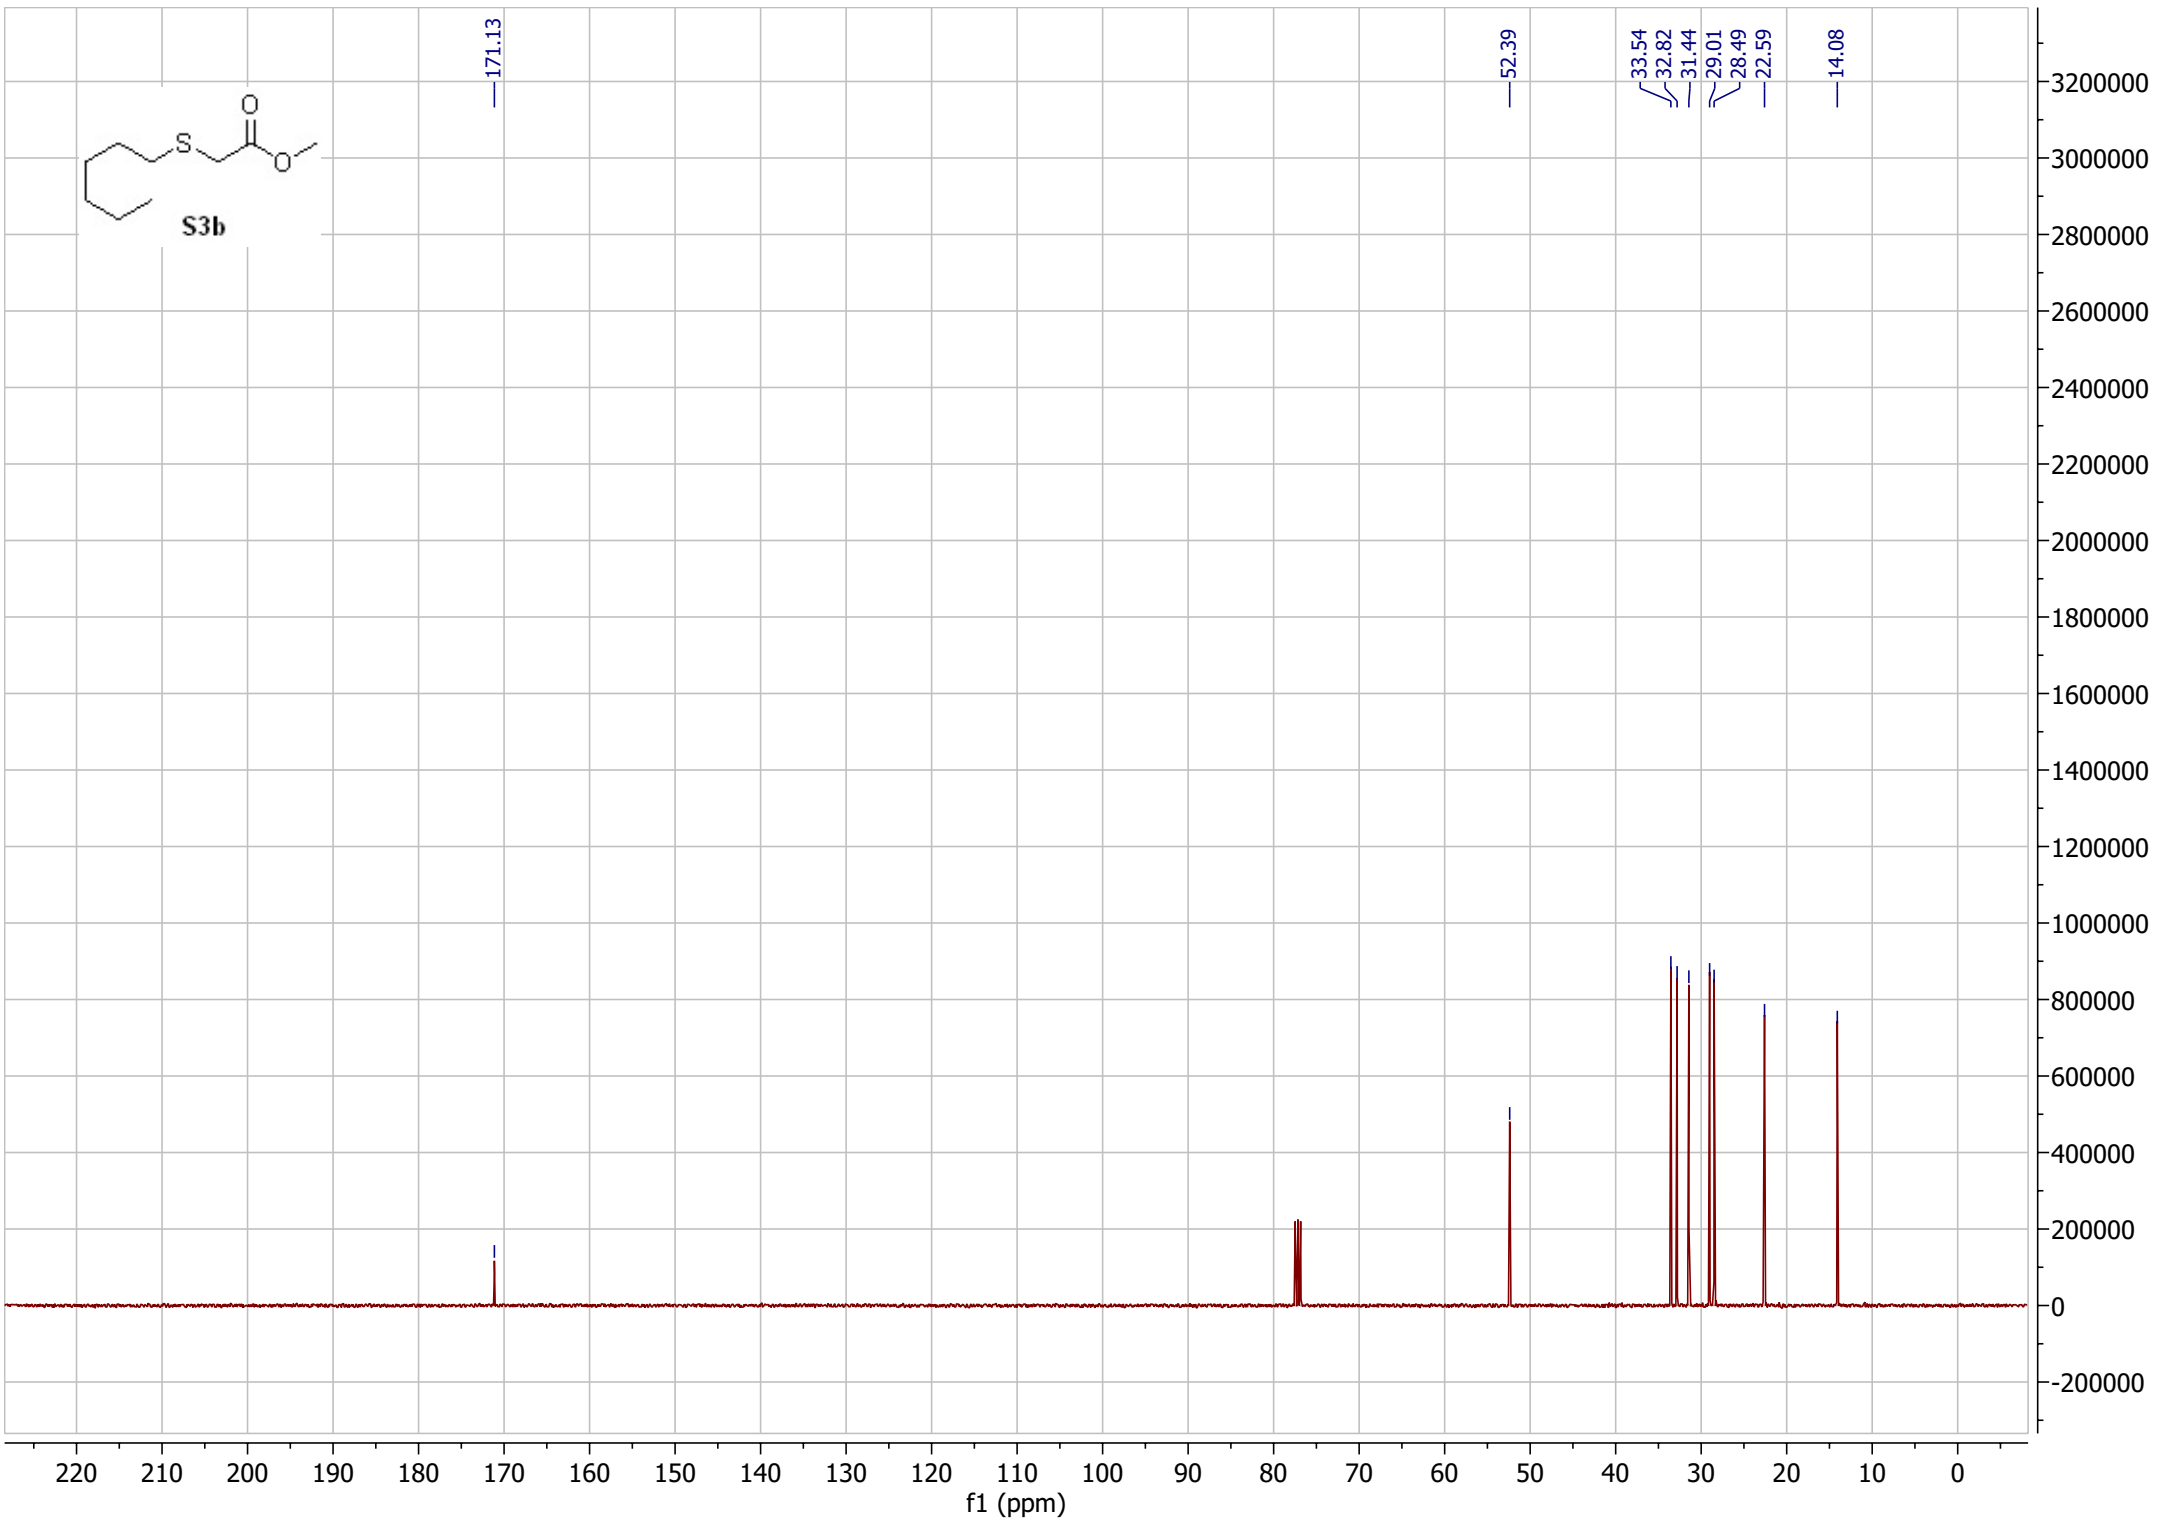

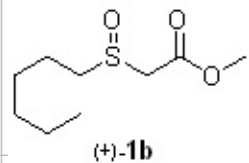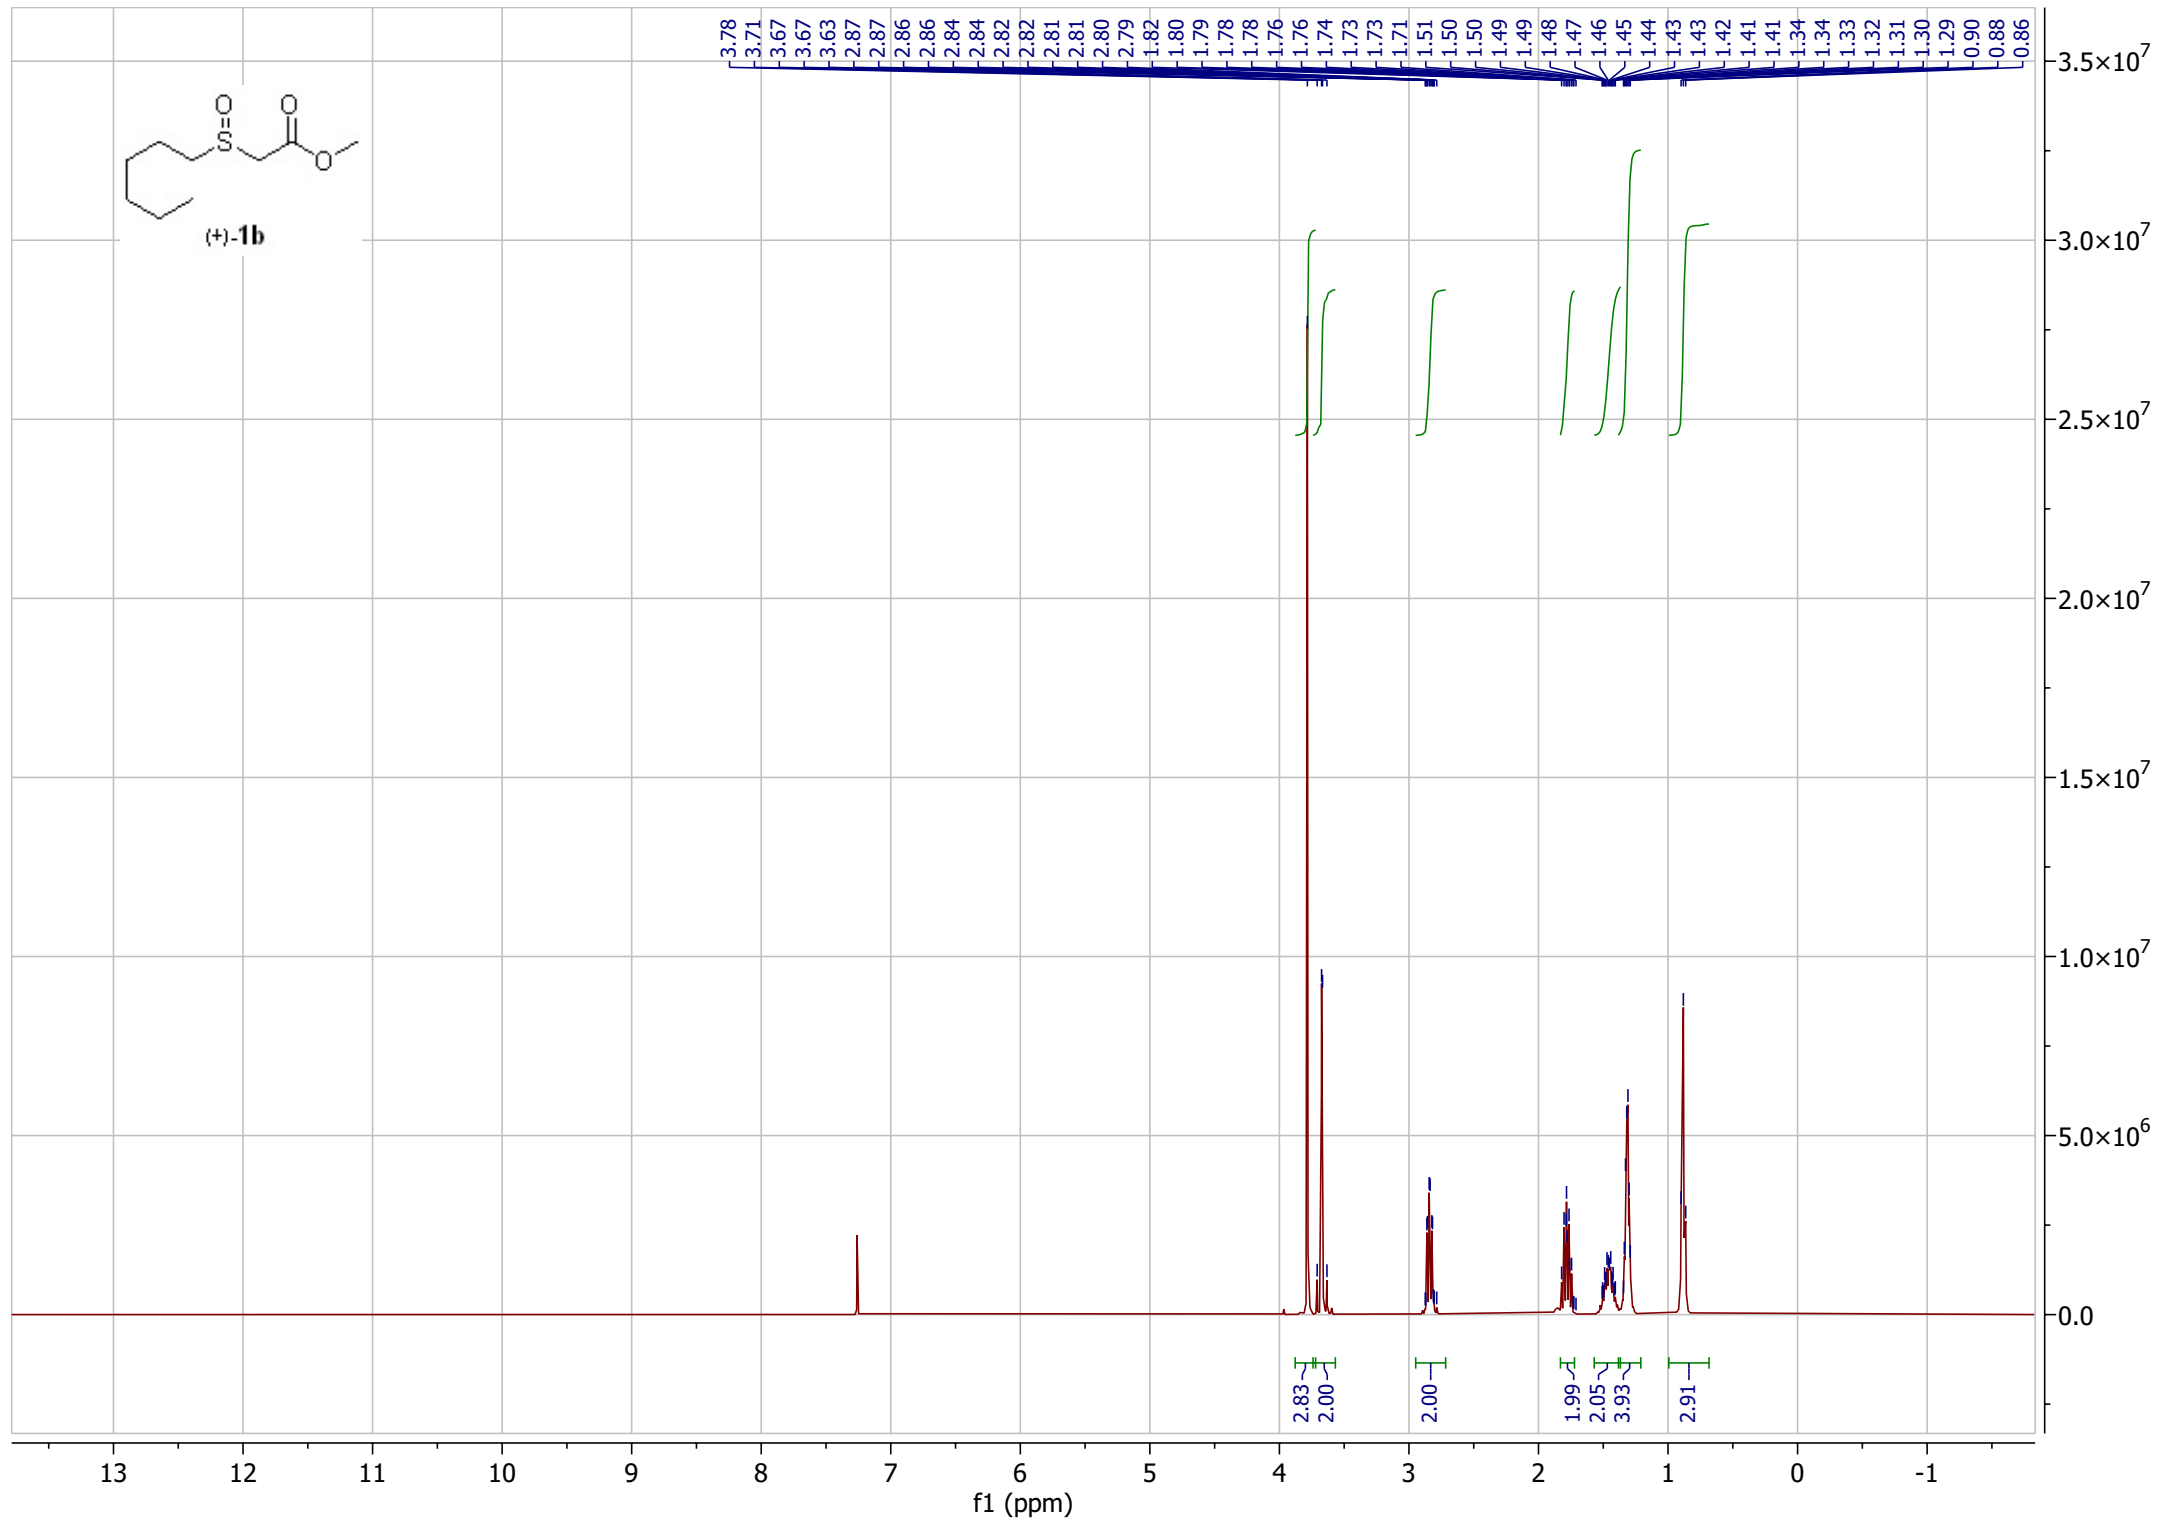

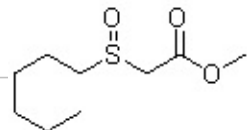

(+)-**1b**

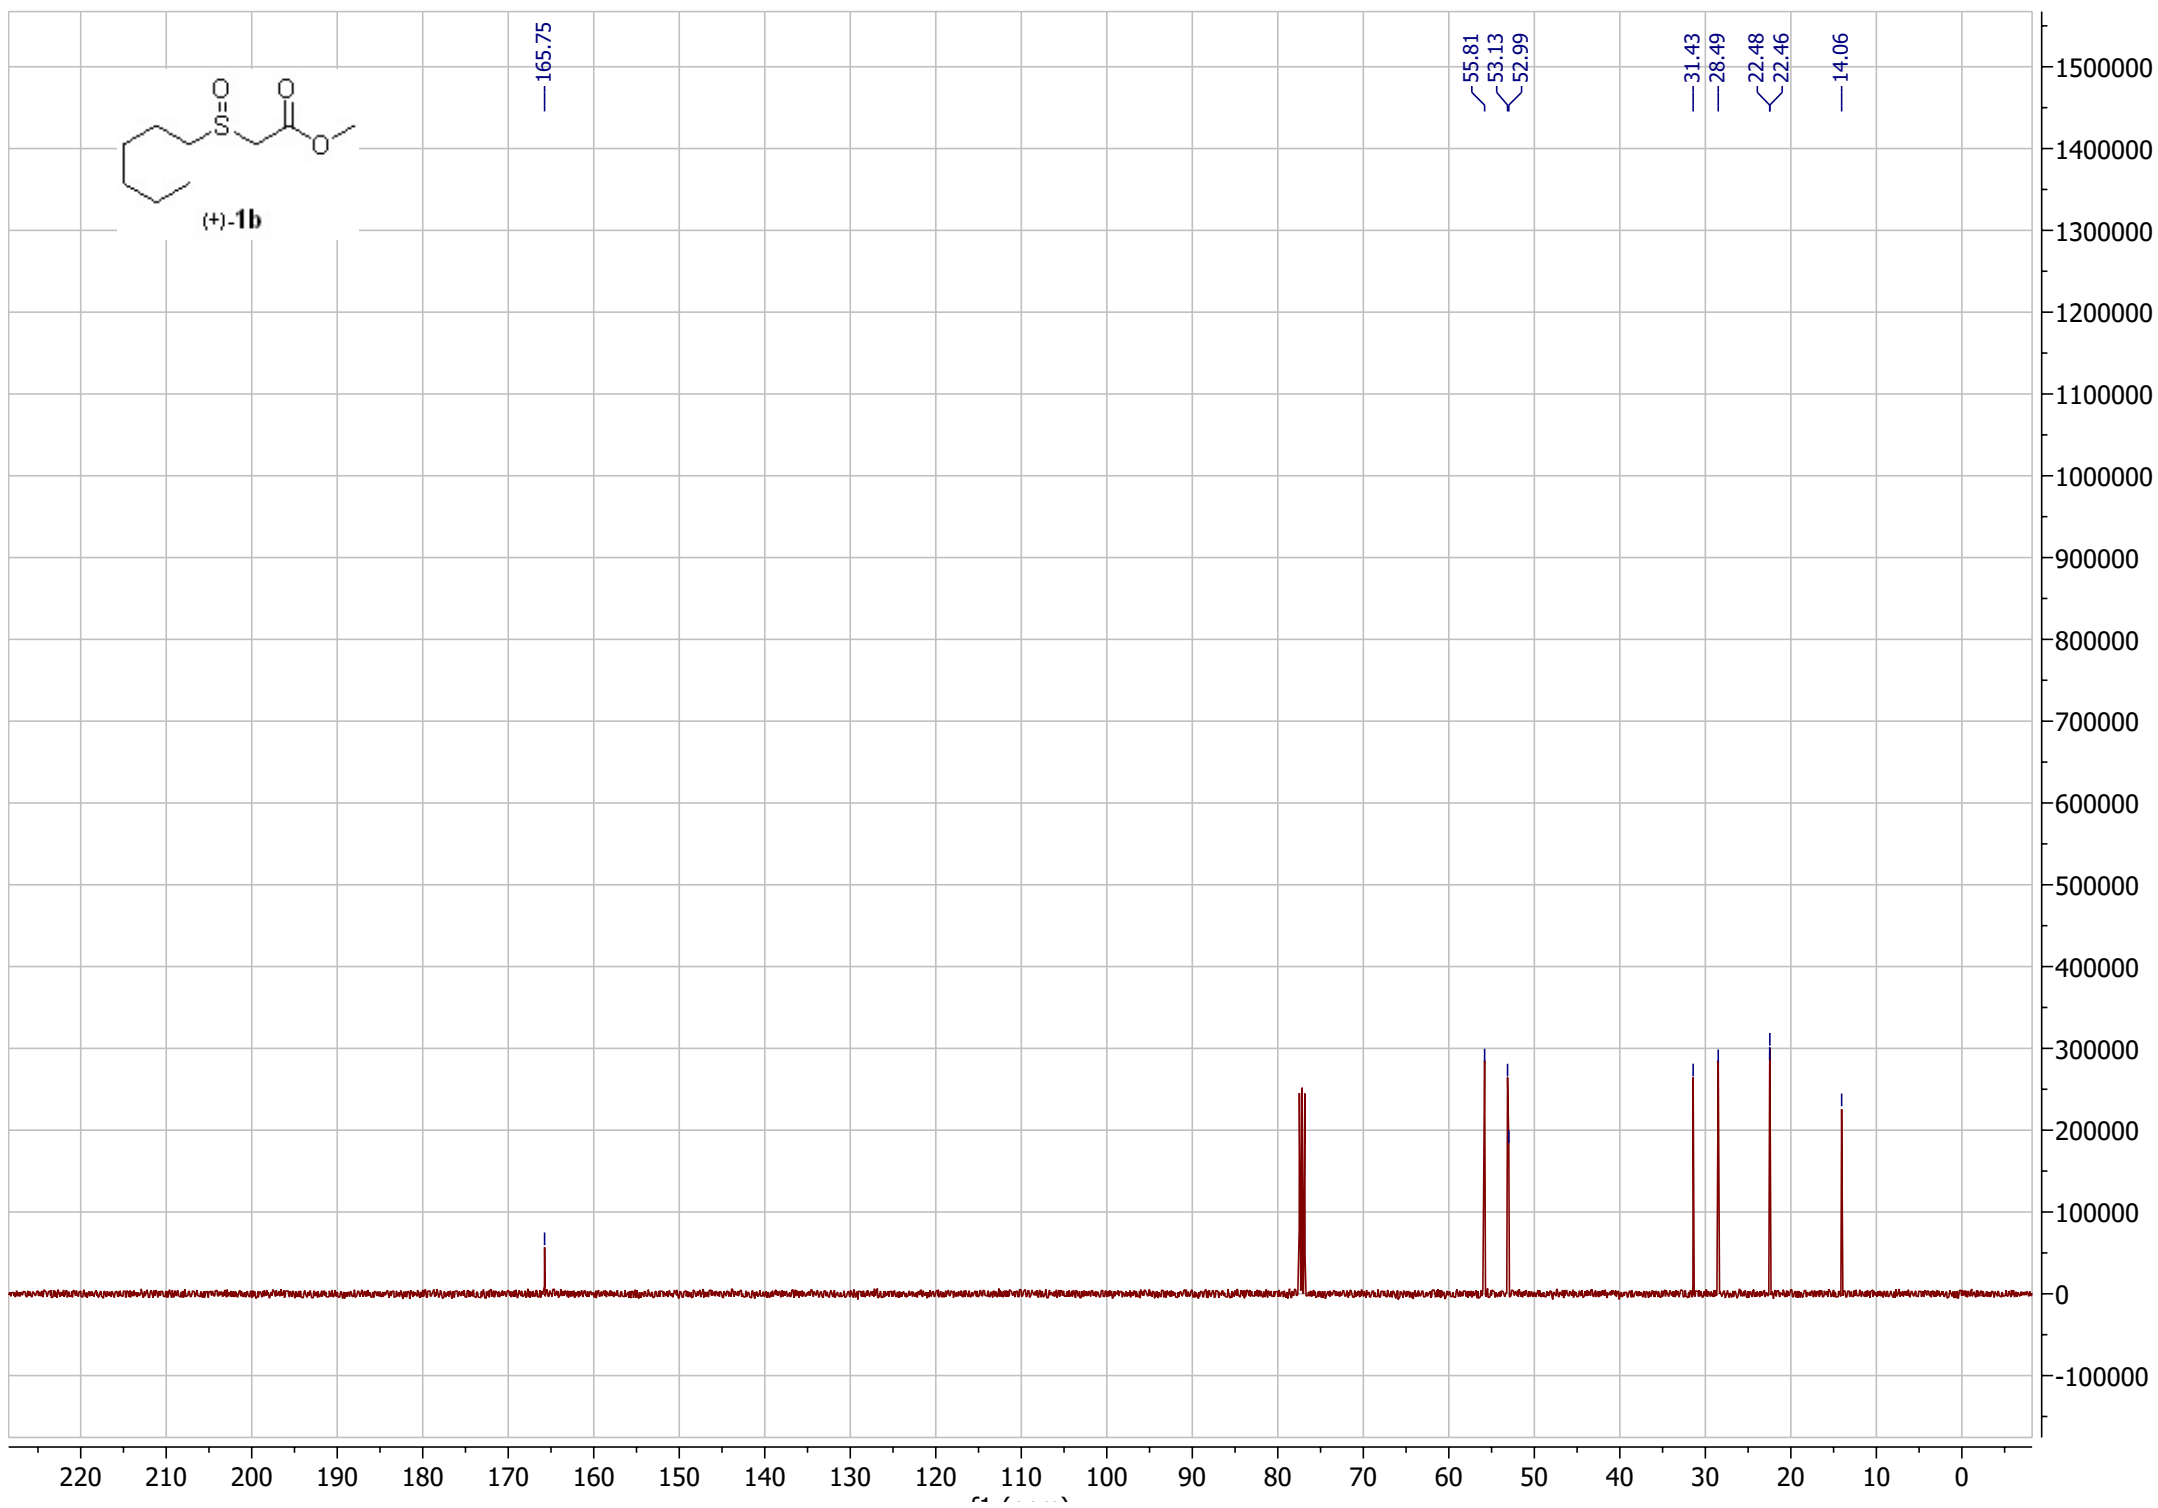

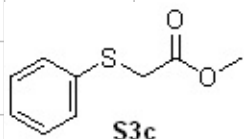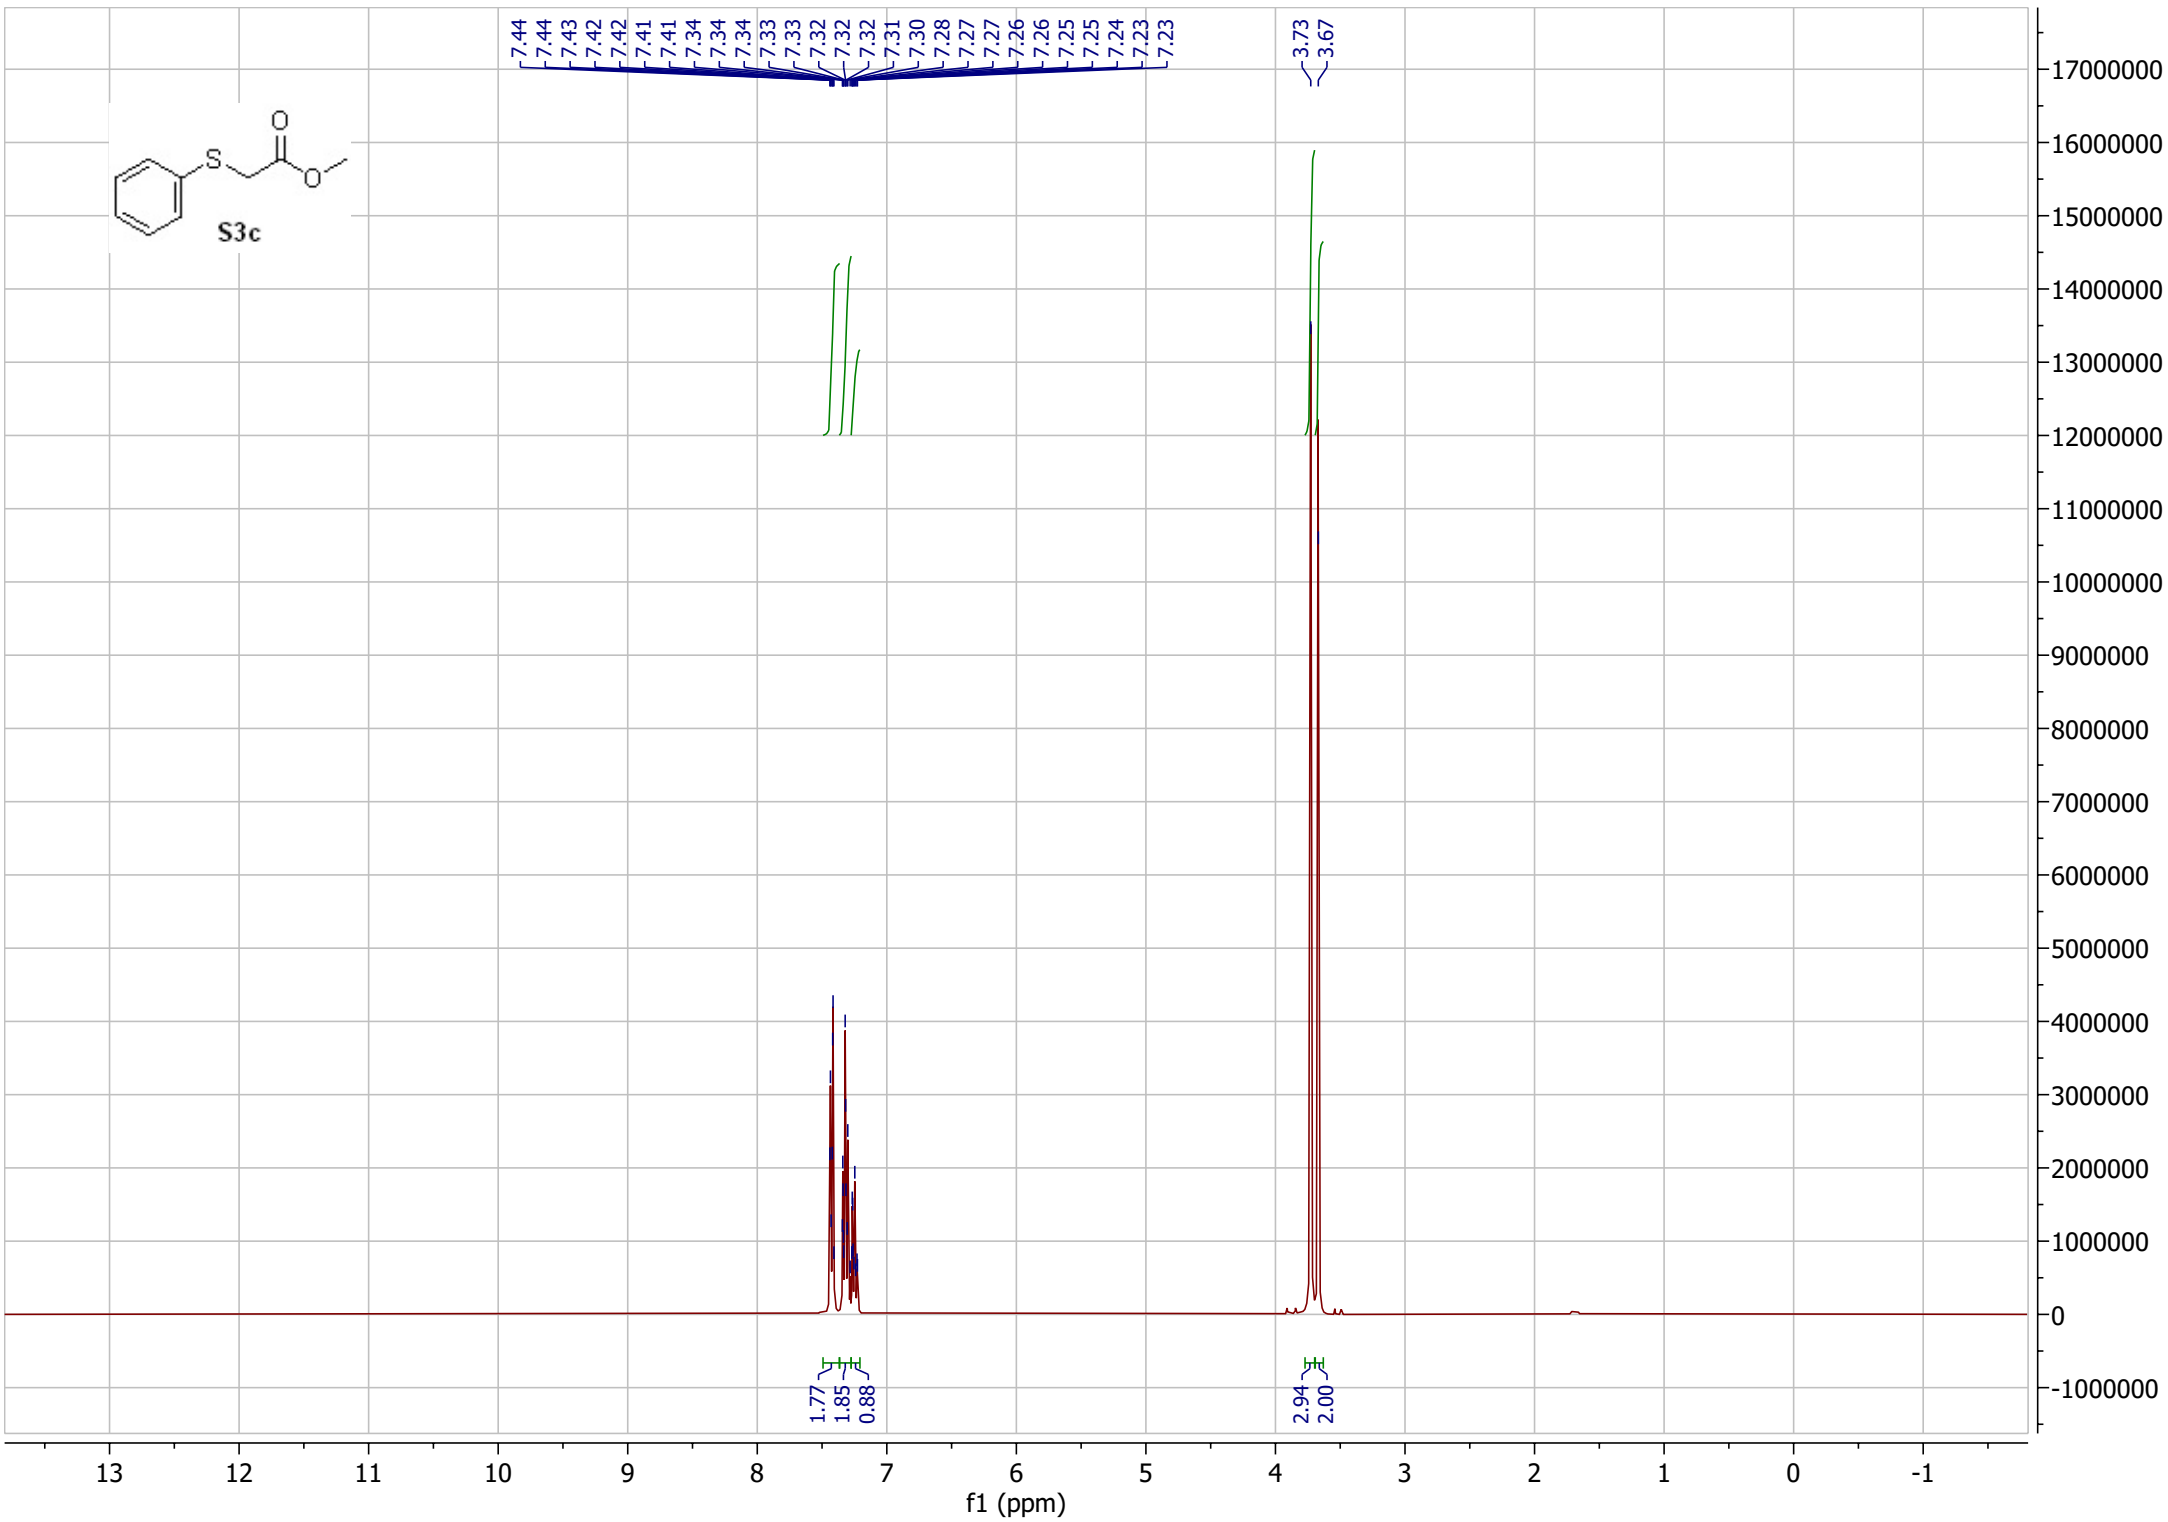

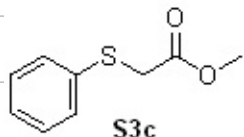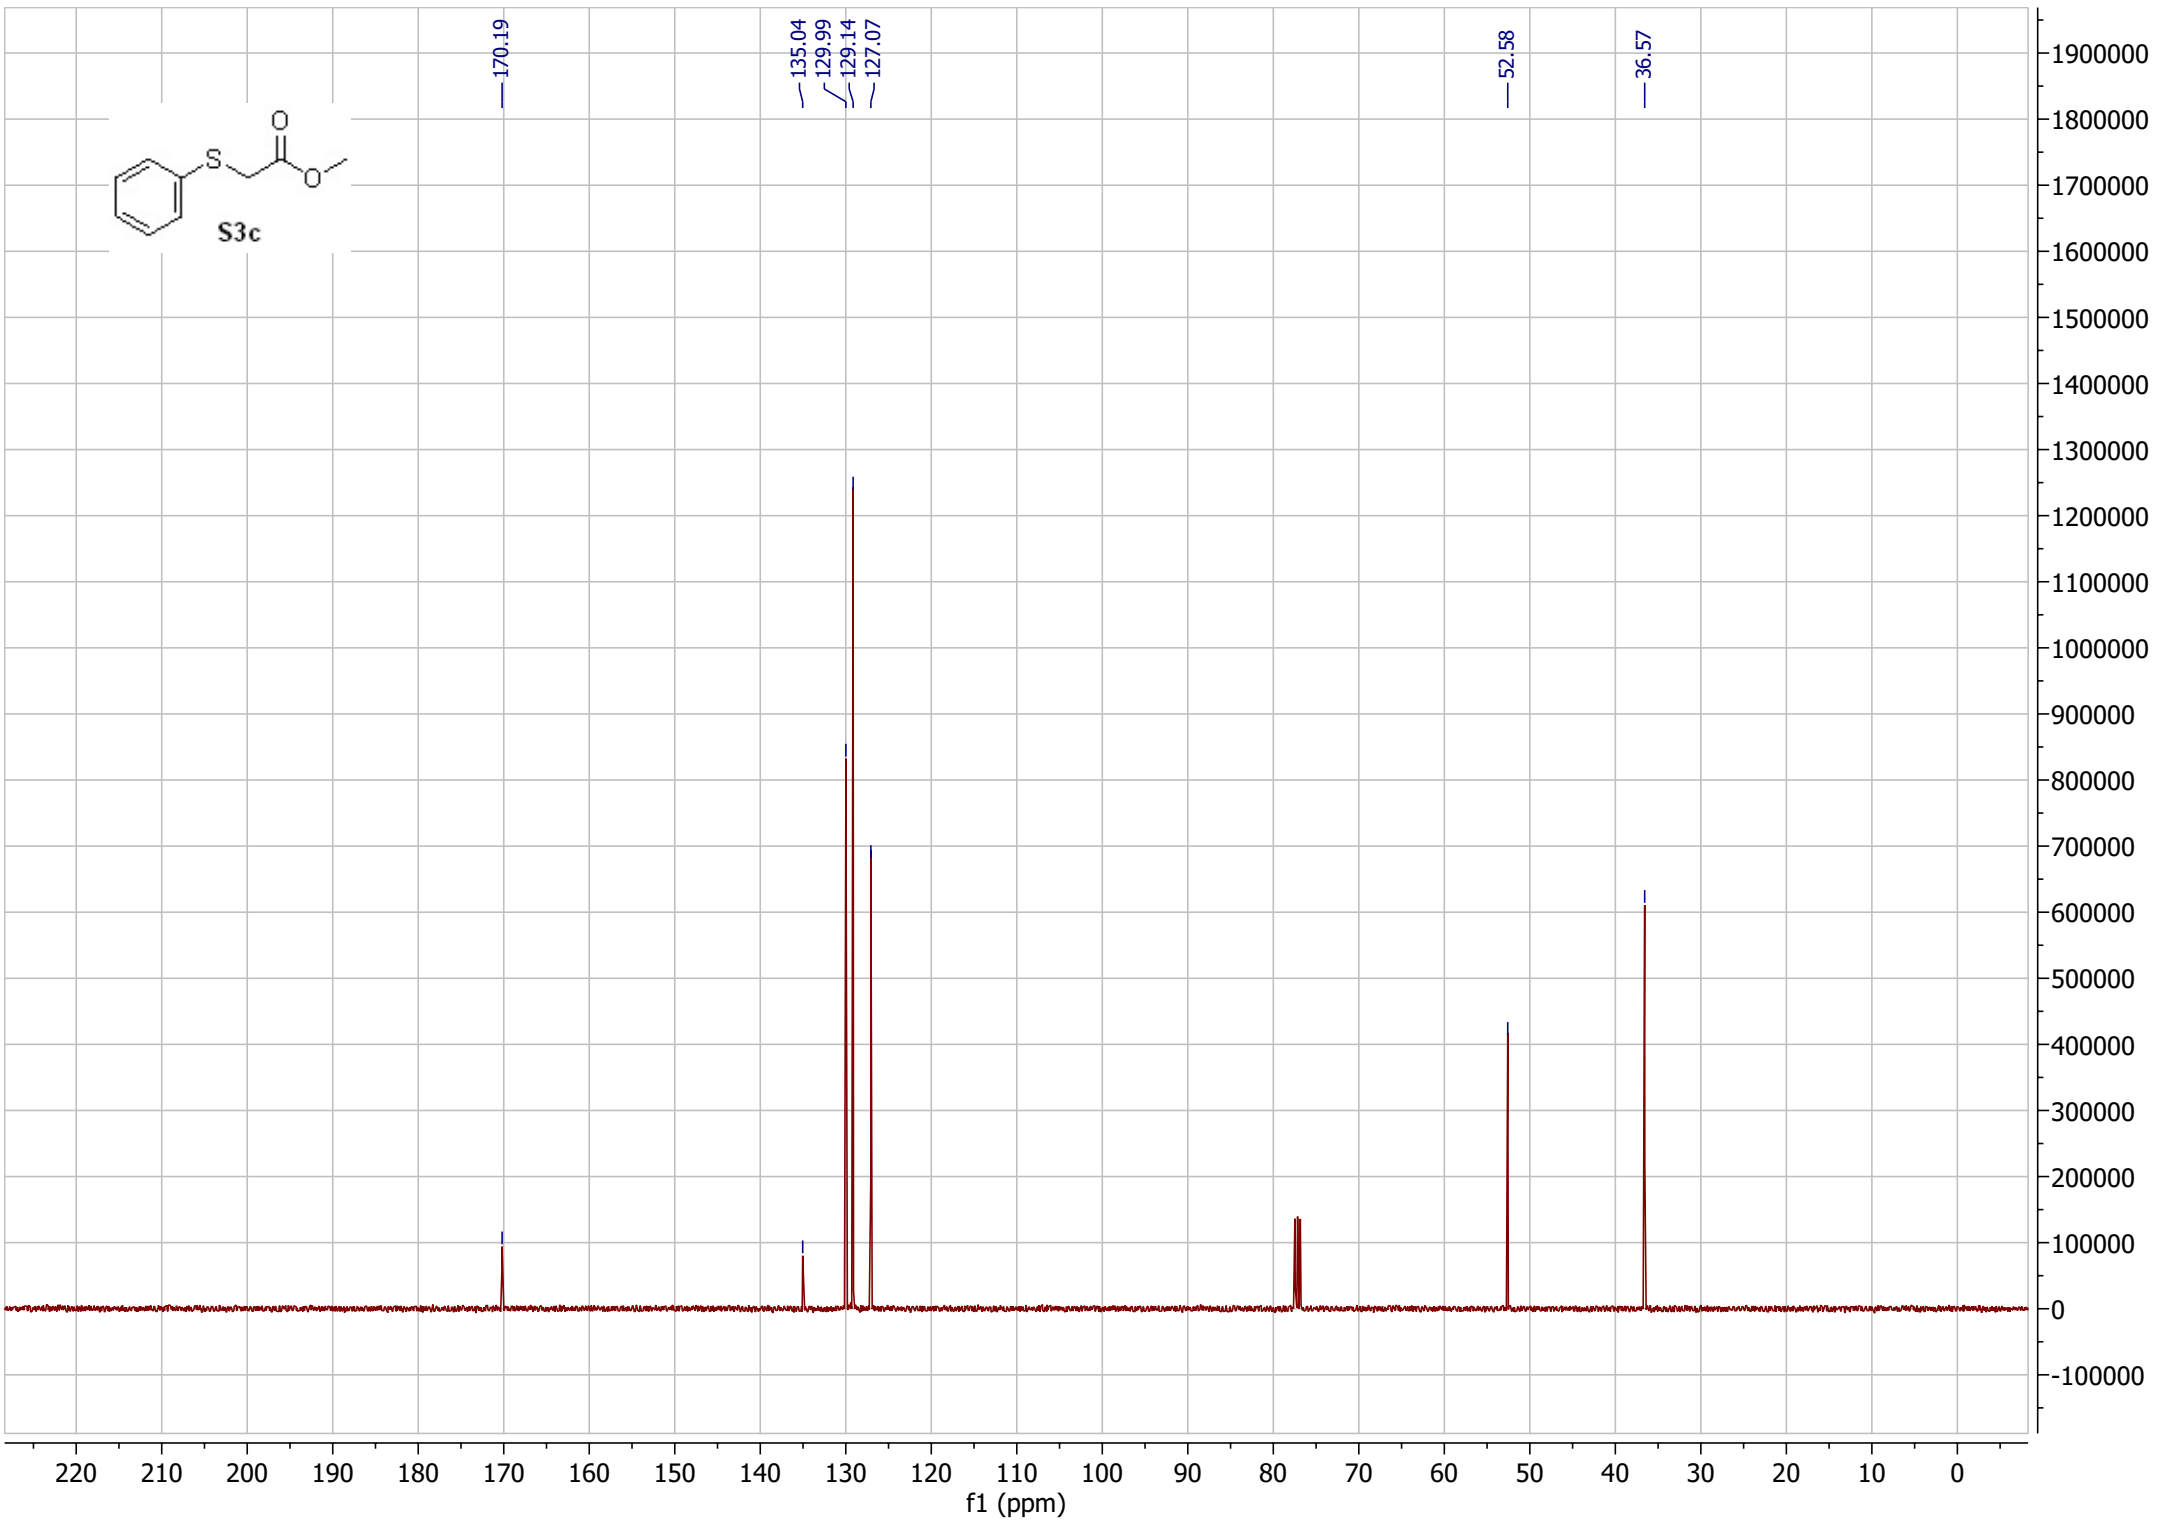

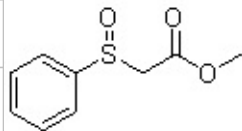

(+)-1c

7.69  
7.69  
7.68  
7.68  
7.67  
7.67  
7.66  
7.66  
7.65  
7.64  
7.56  
7.56  
7.55  
7.54  
7.54  
7.53  
7.52  
7.51  
7.50

3.85  
3.81  
3.70  
3.69  
3.69  
3.68  
3.64

1.78  
2.81

1.00  
3.97

f1 (ppm)

13 12 11 10 9 8 7 6 5 4 3 2 1 0 -1

19000000  
18000000  
17000000  
16000000  
15000000  
14000000  
13000000  
12000000  
11000000  
10000000  
9000000  
8000000  
7000000  
6000000  
5000000  
4000000  
3000000  
2000000  
1000000  
0  
-1000000

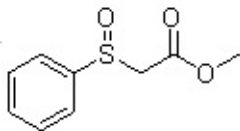

(+)-1c

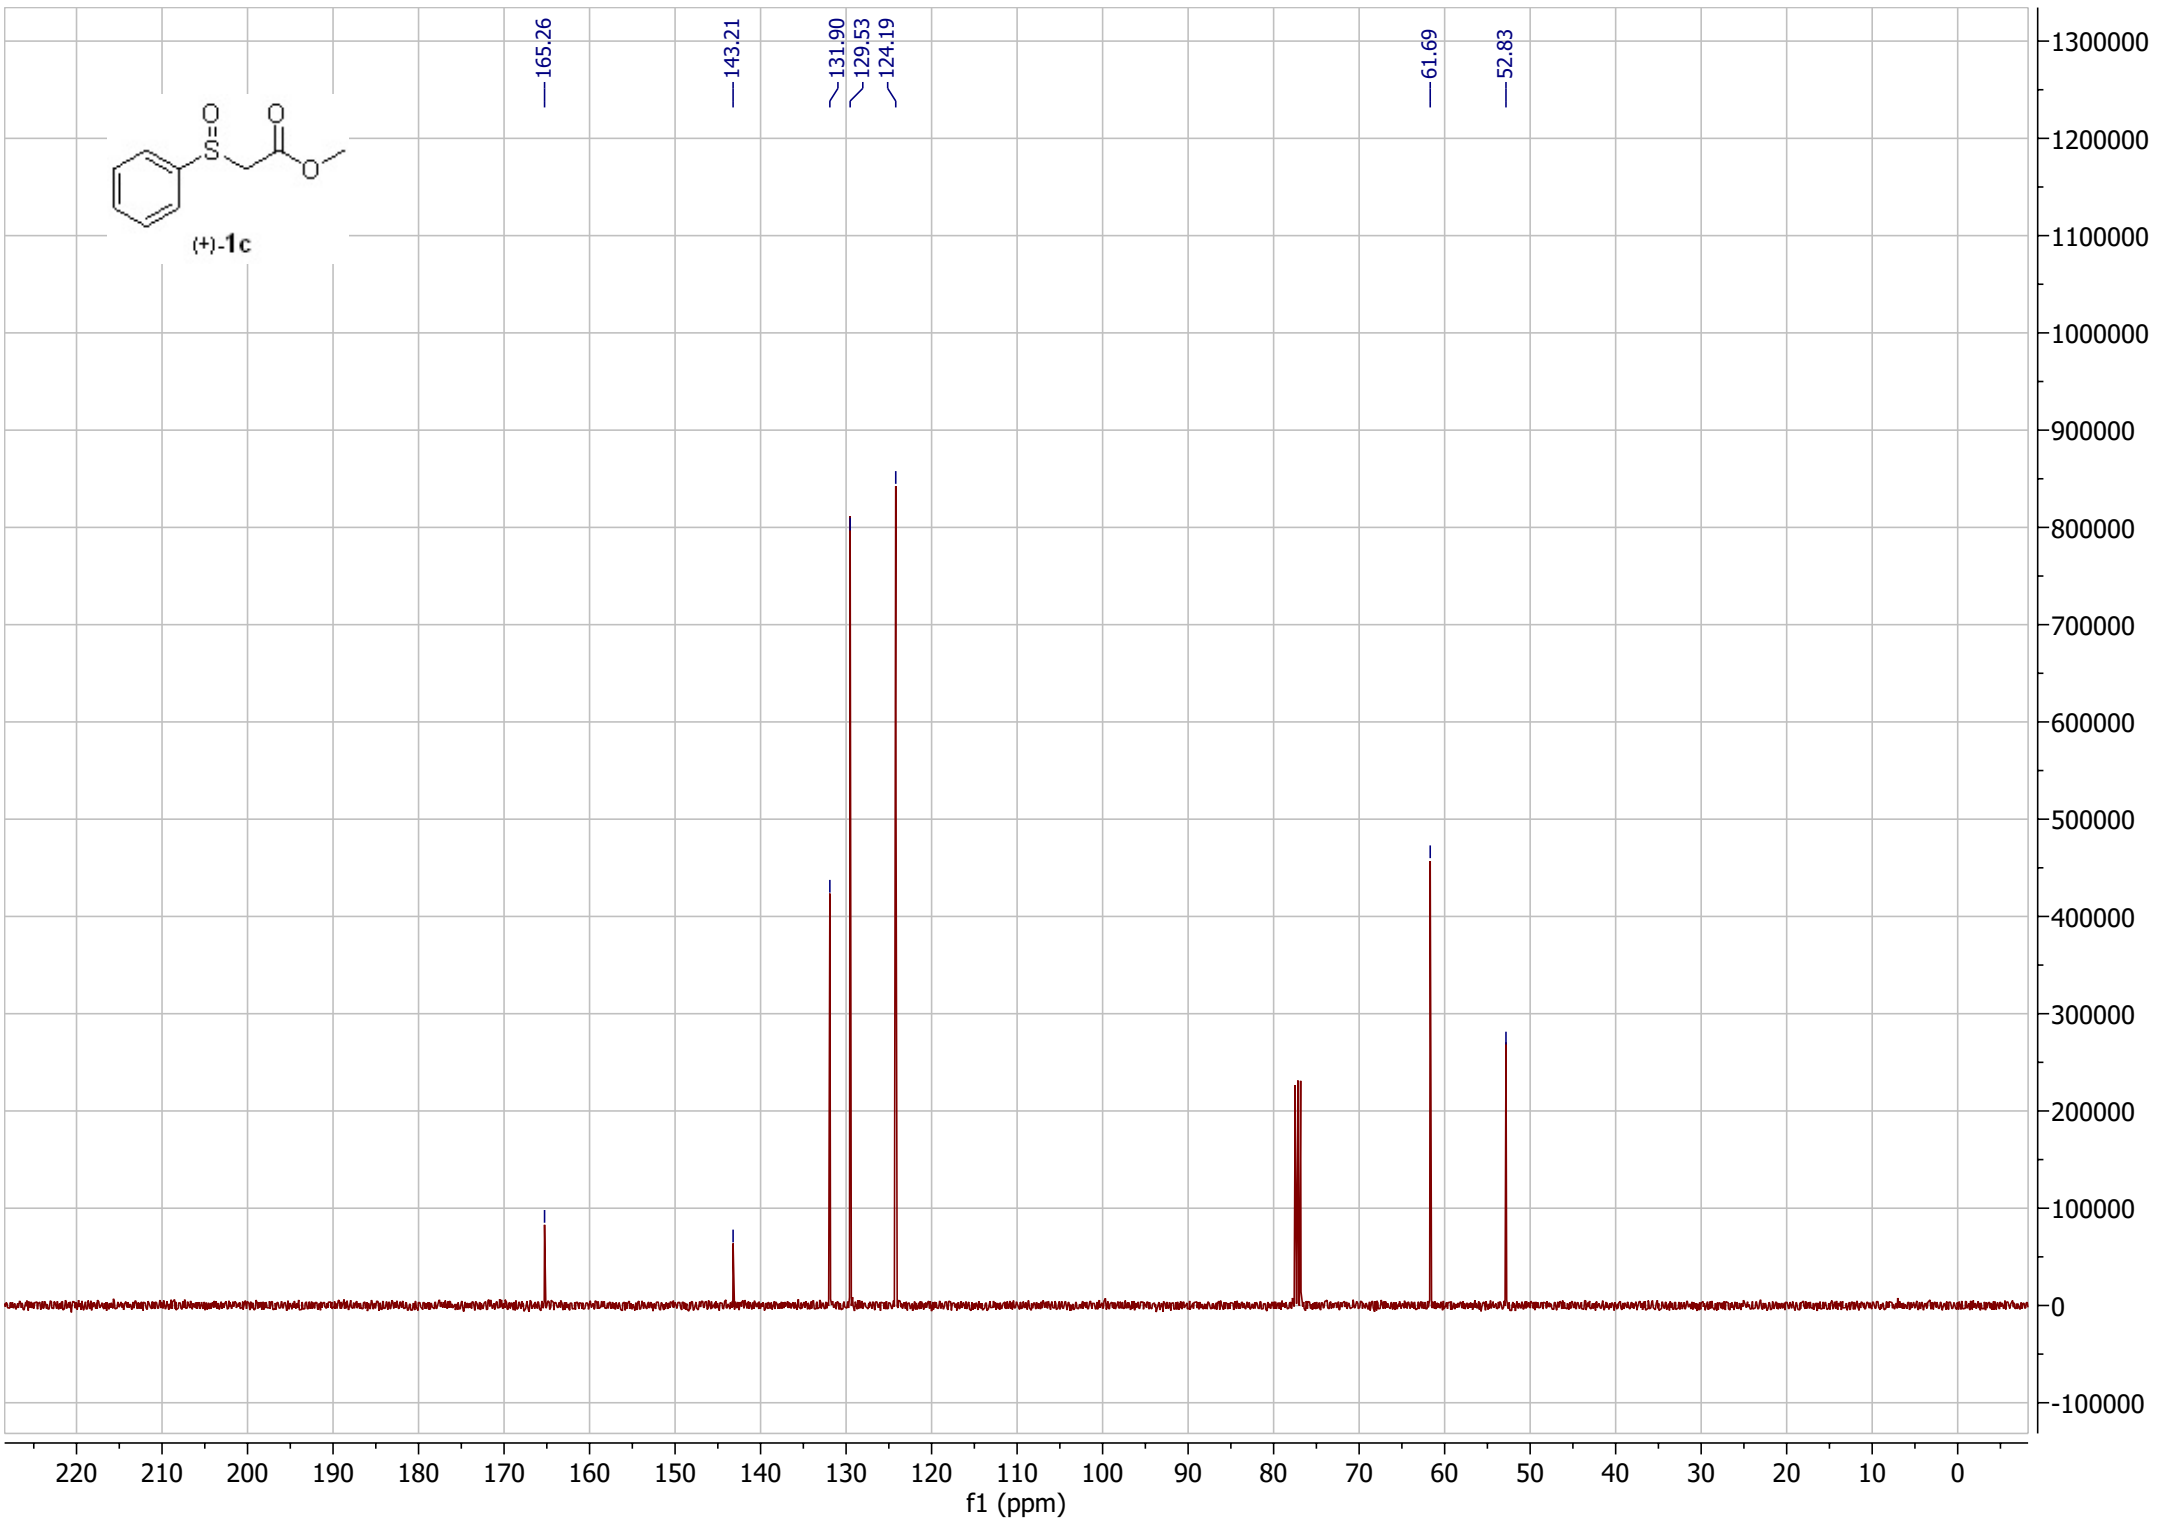



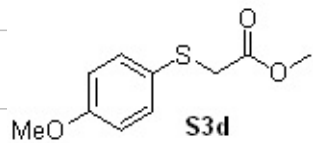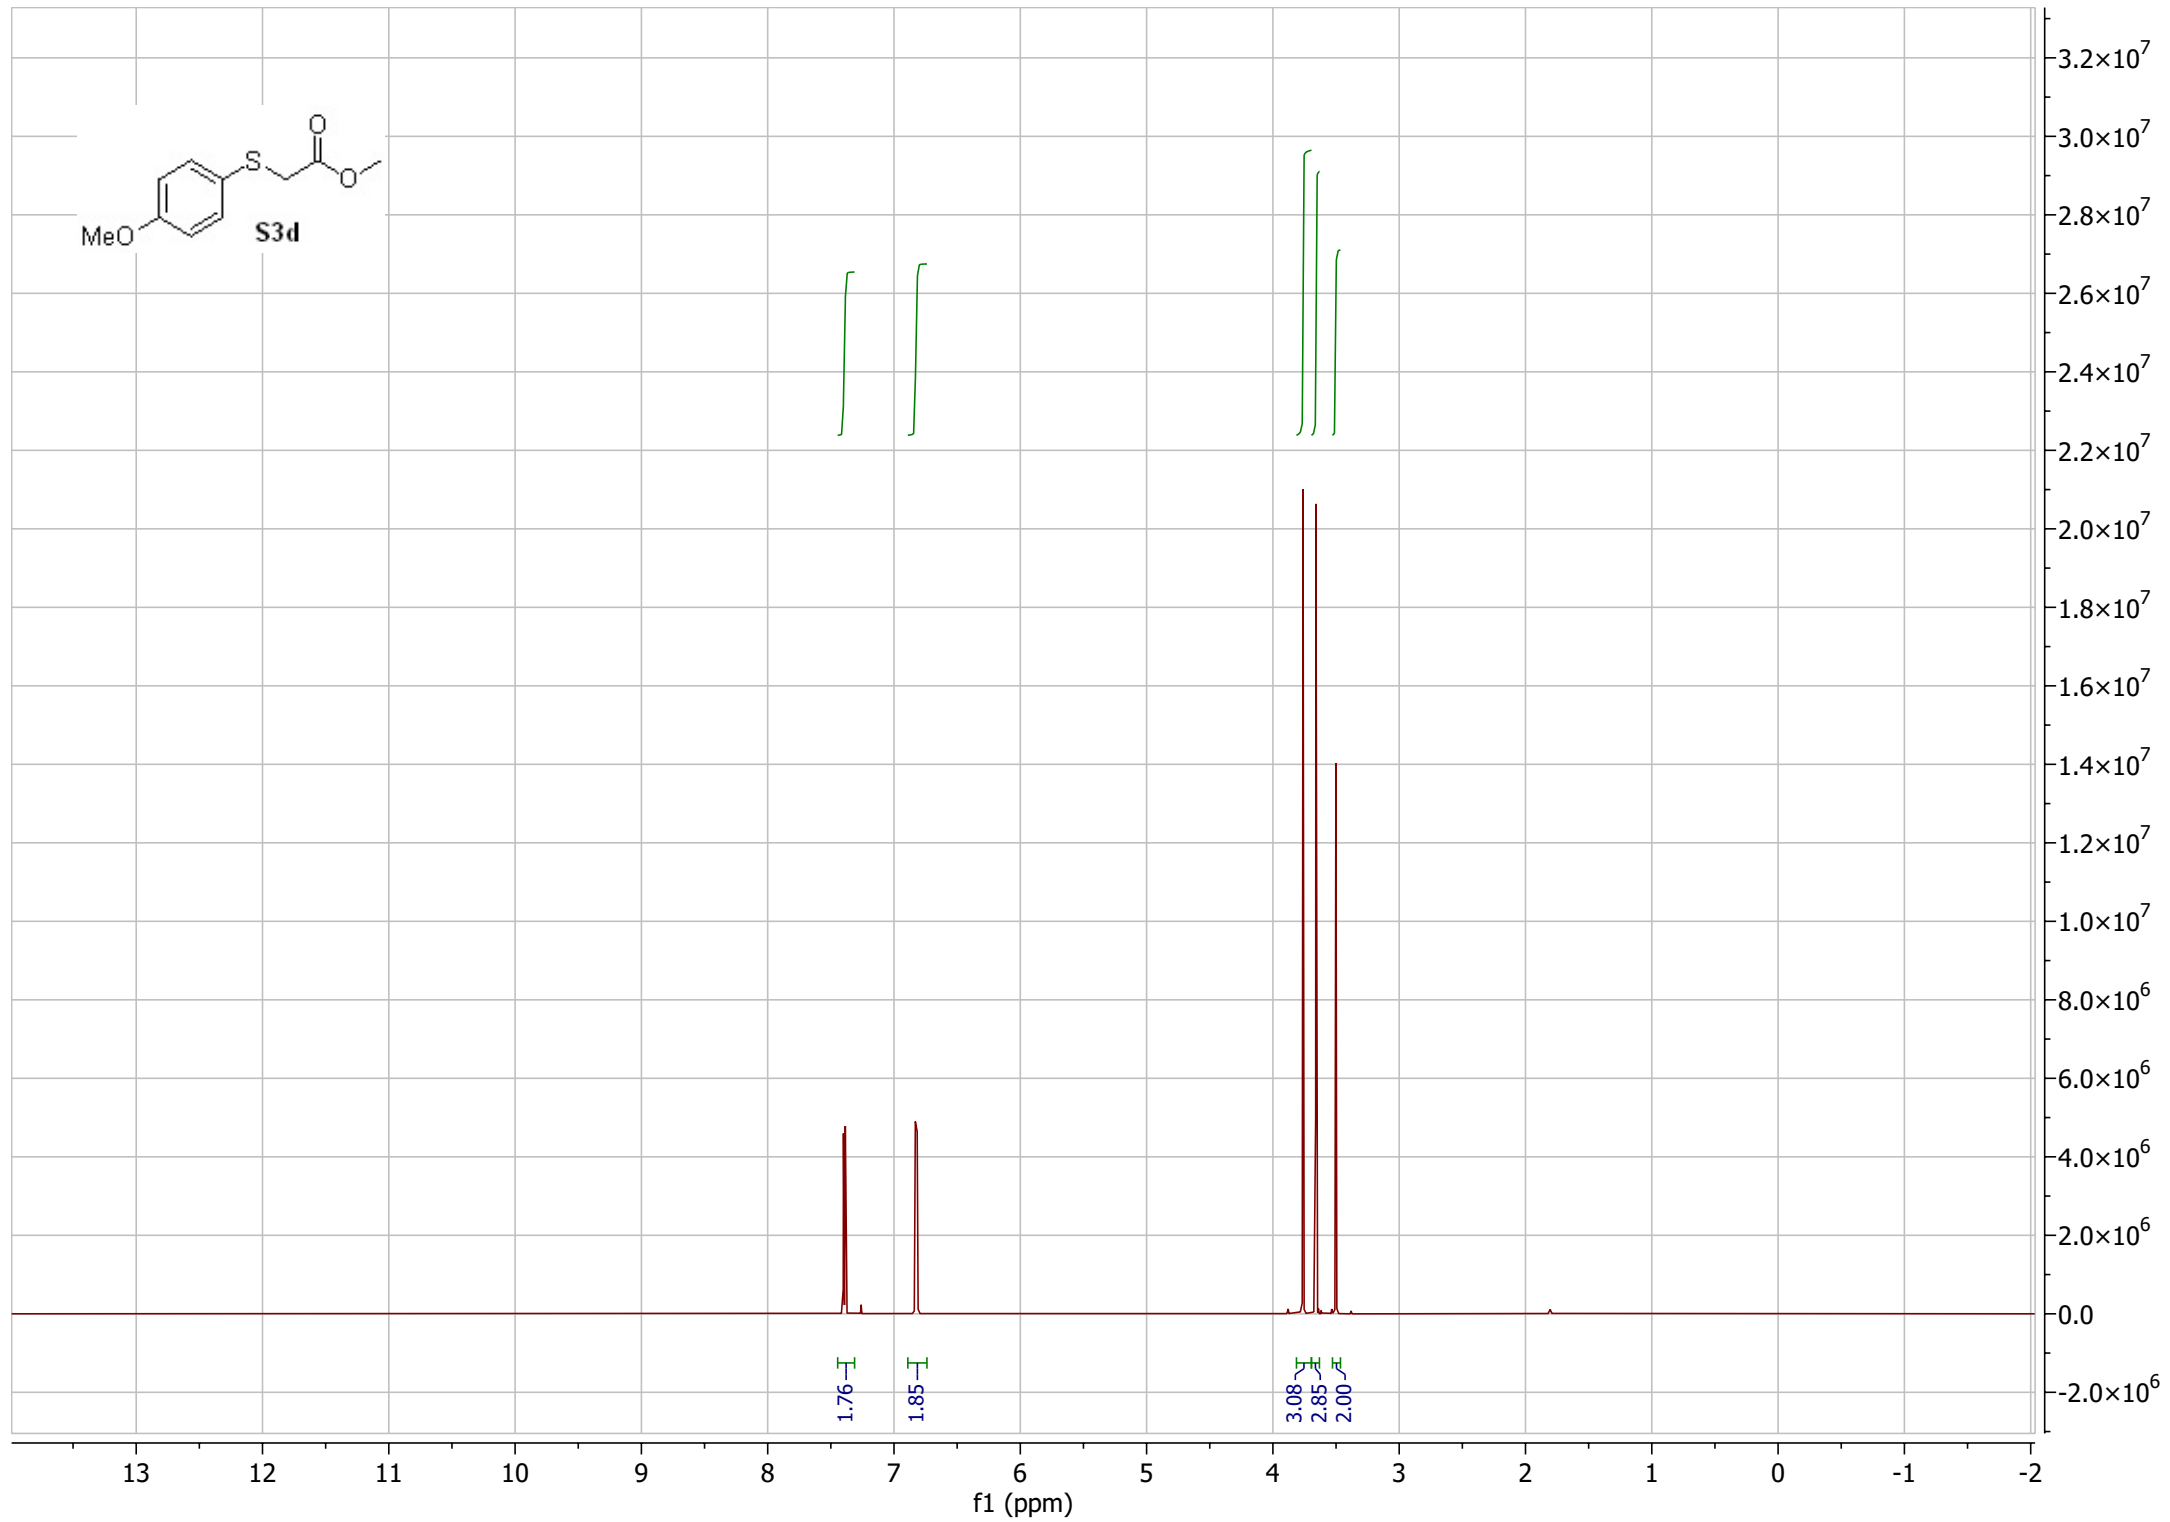

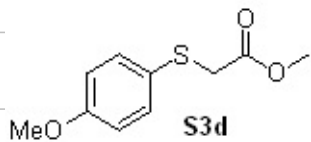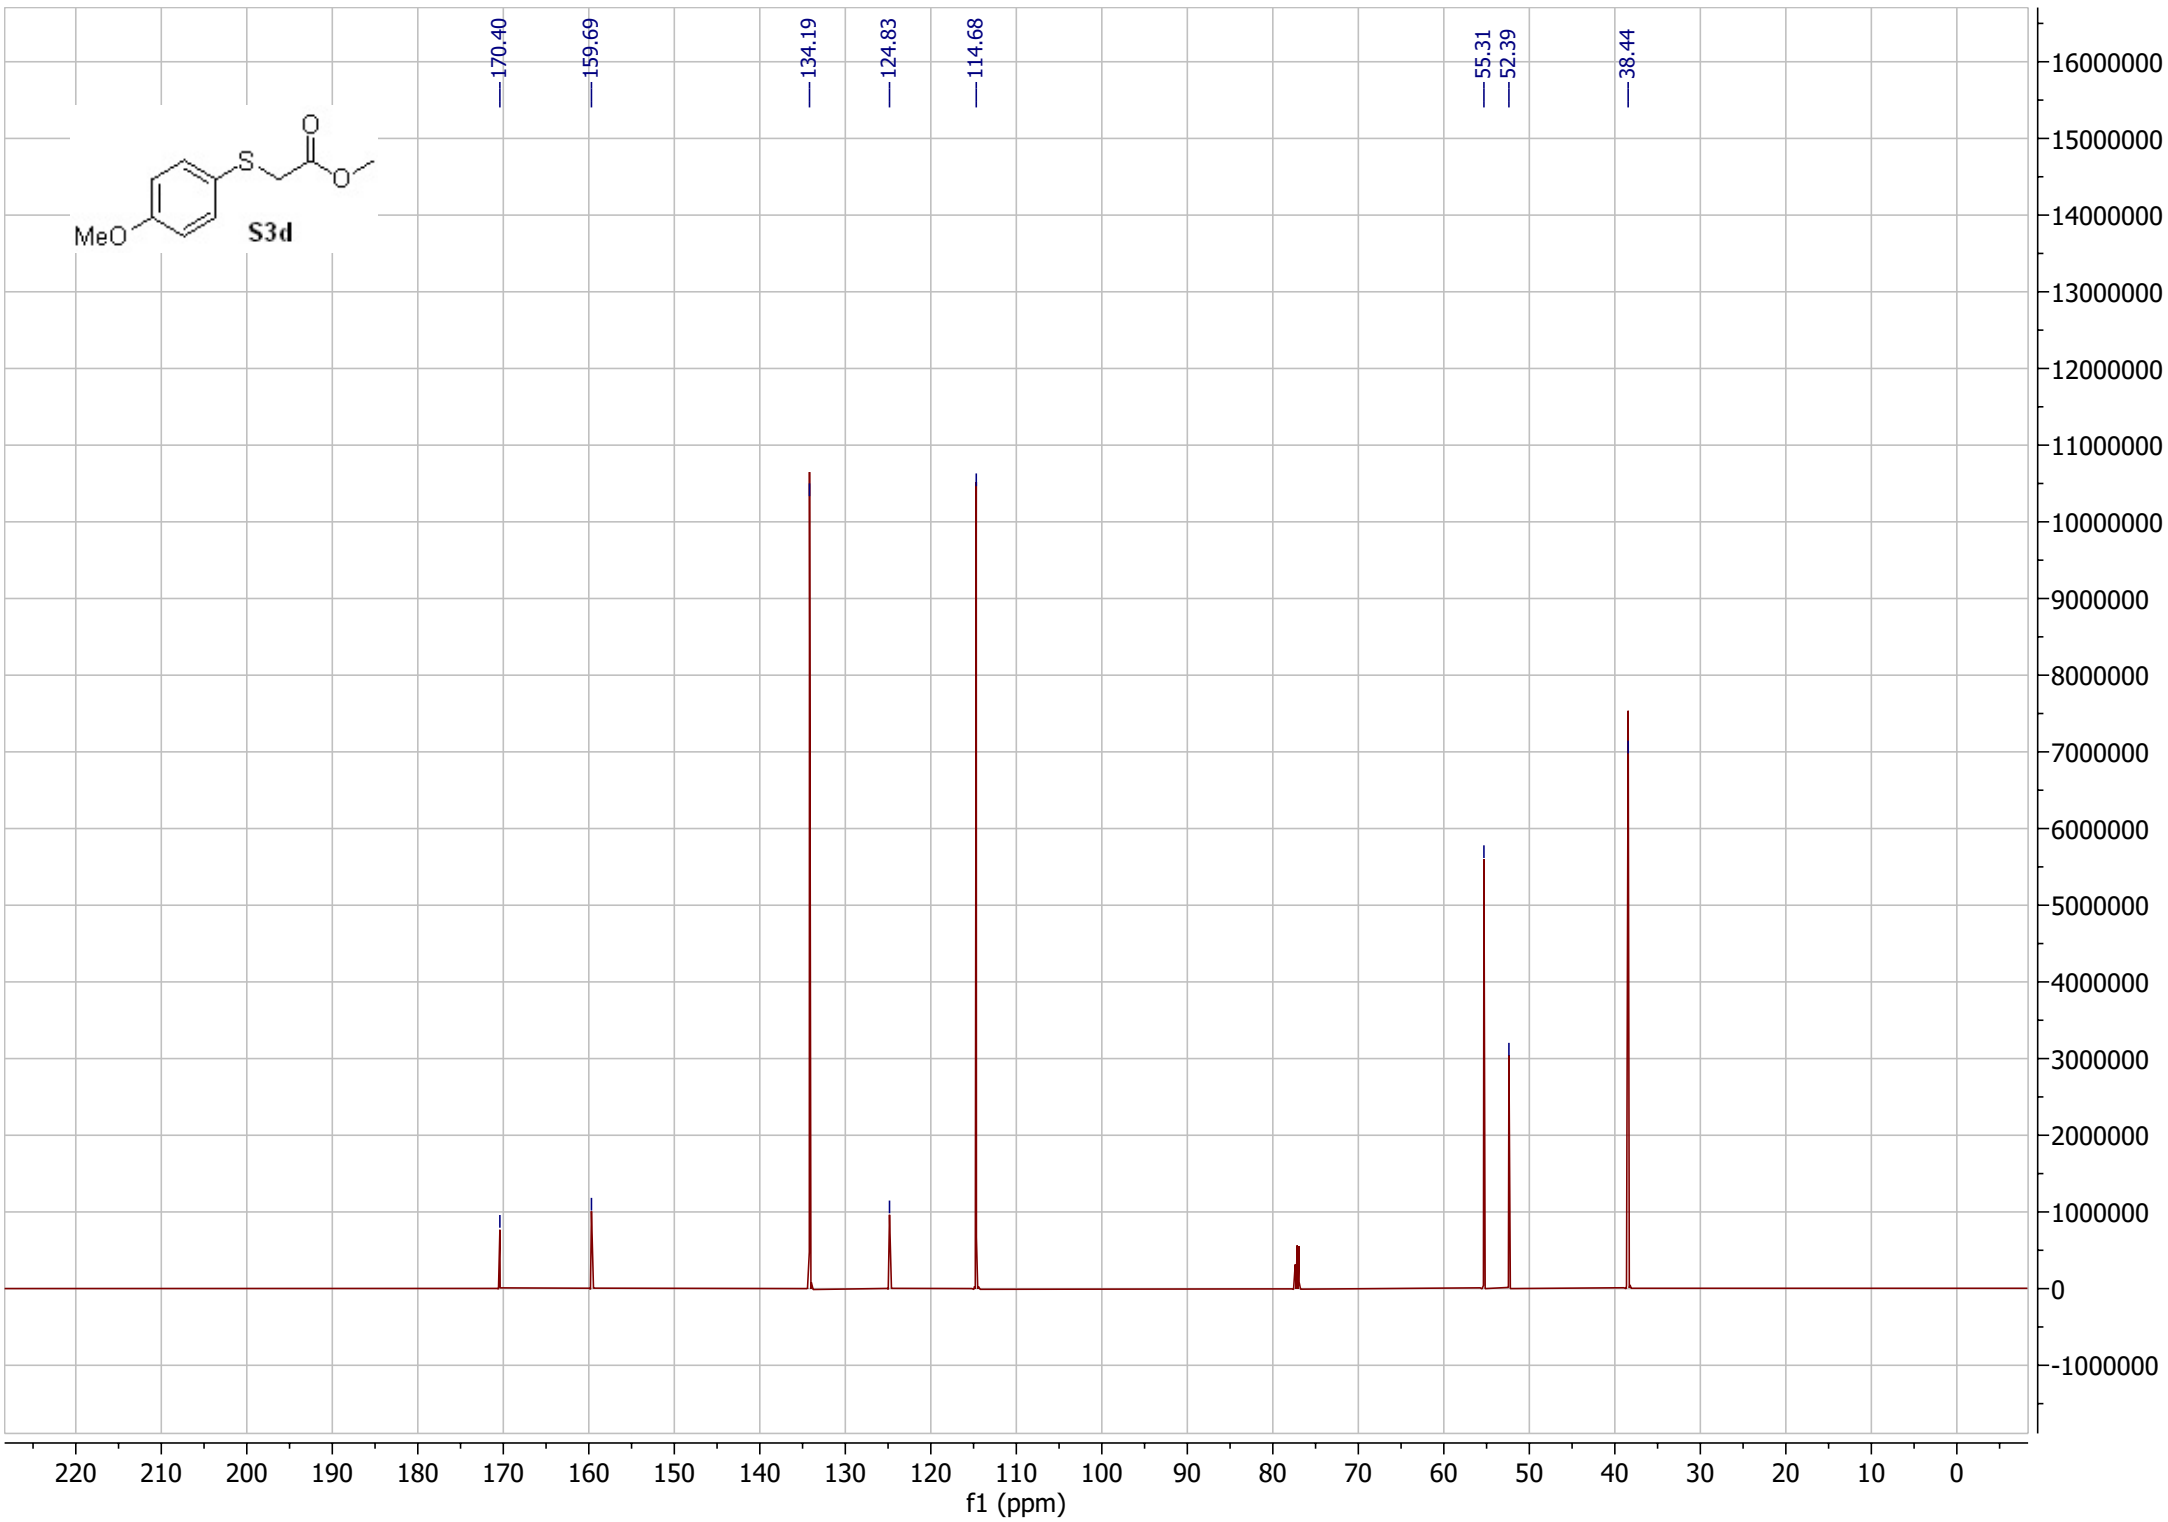

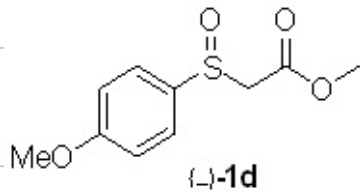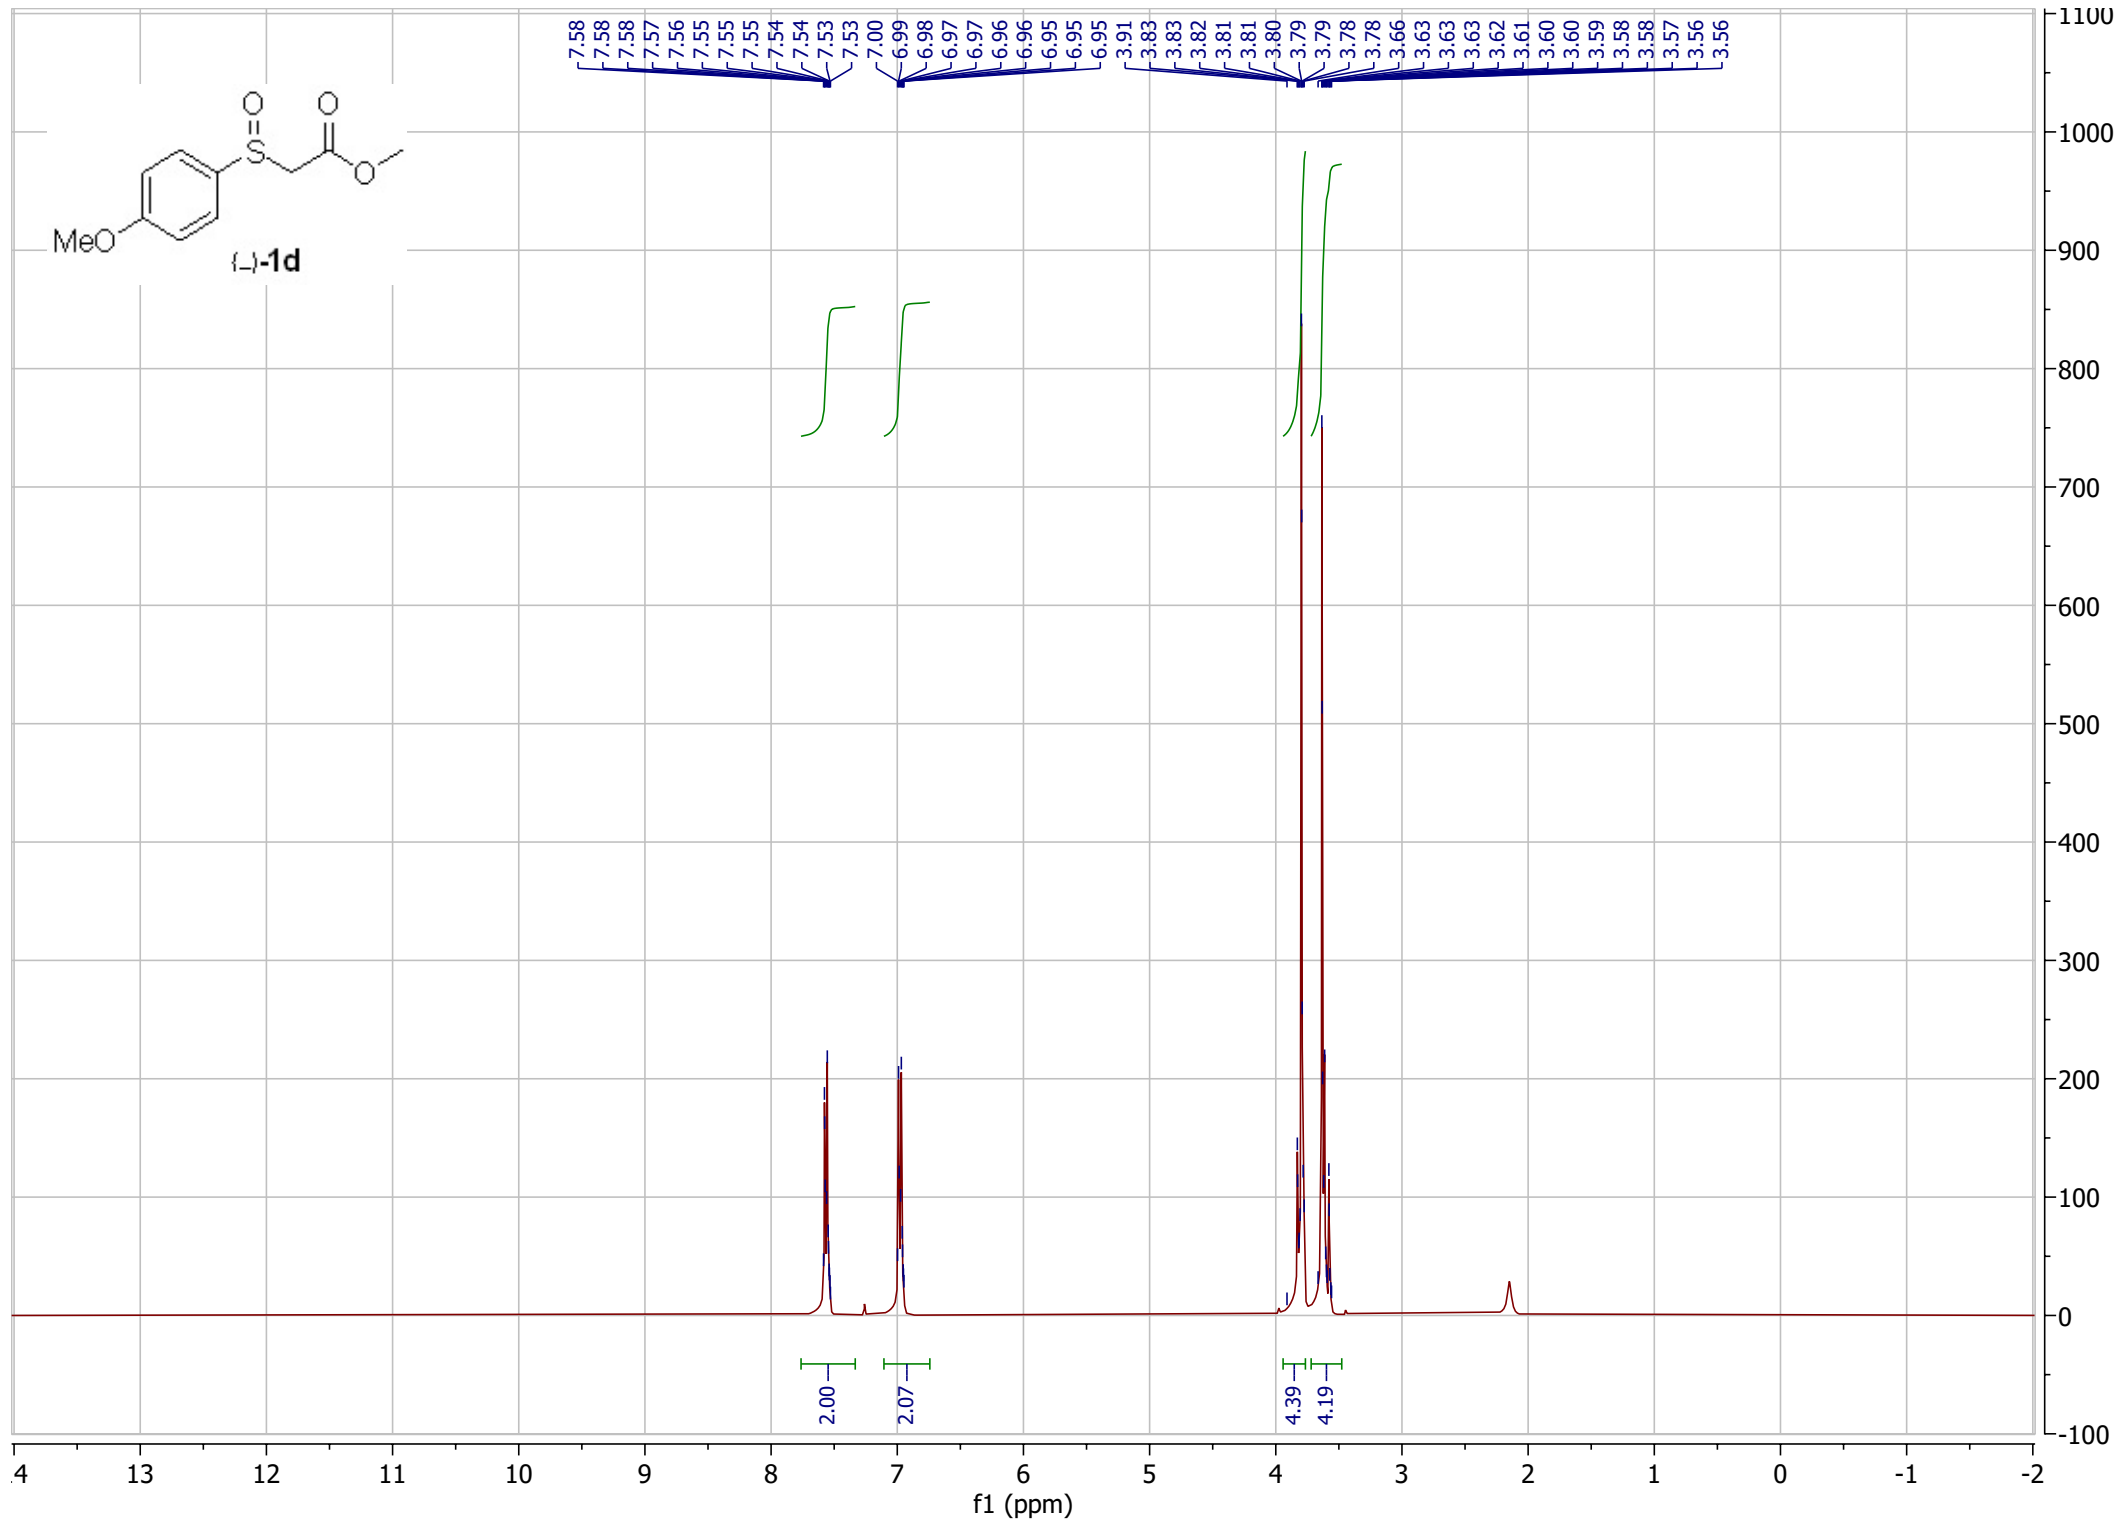

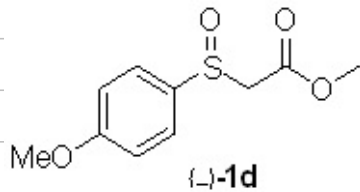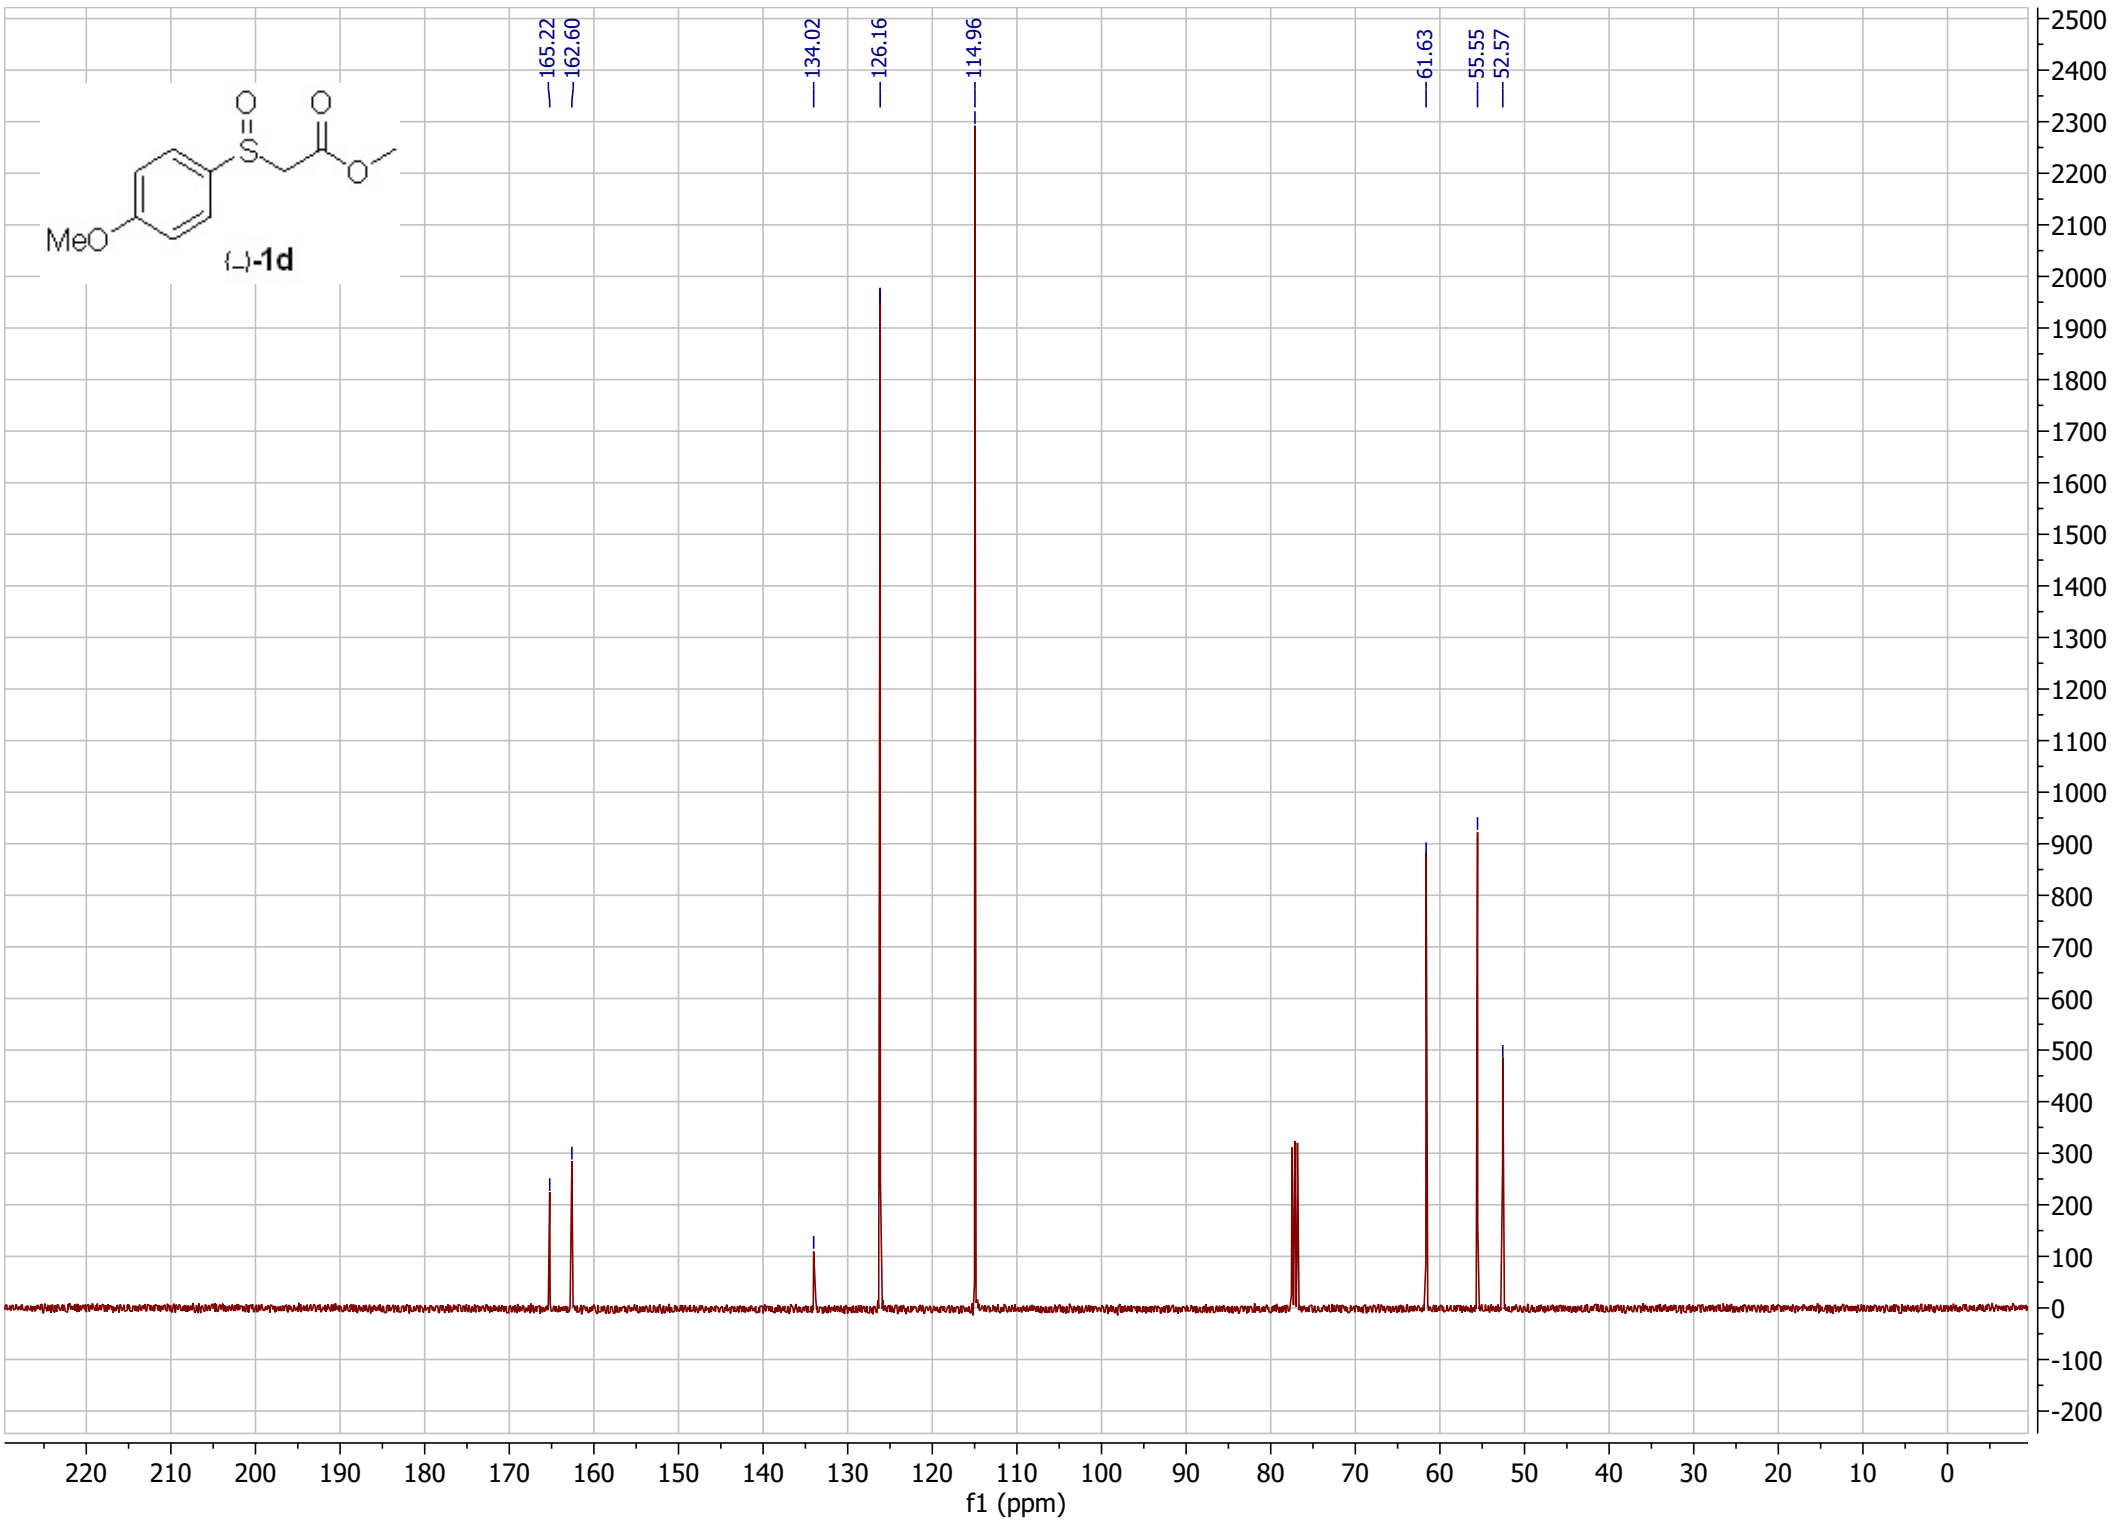

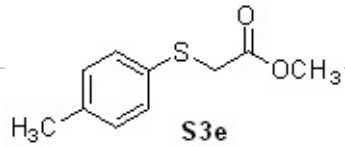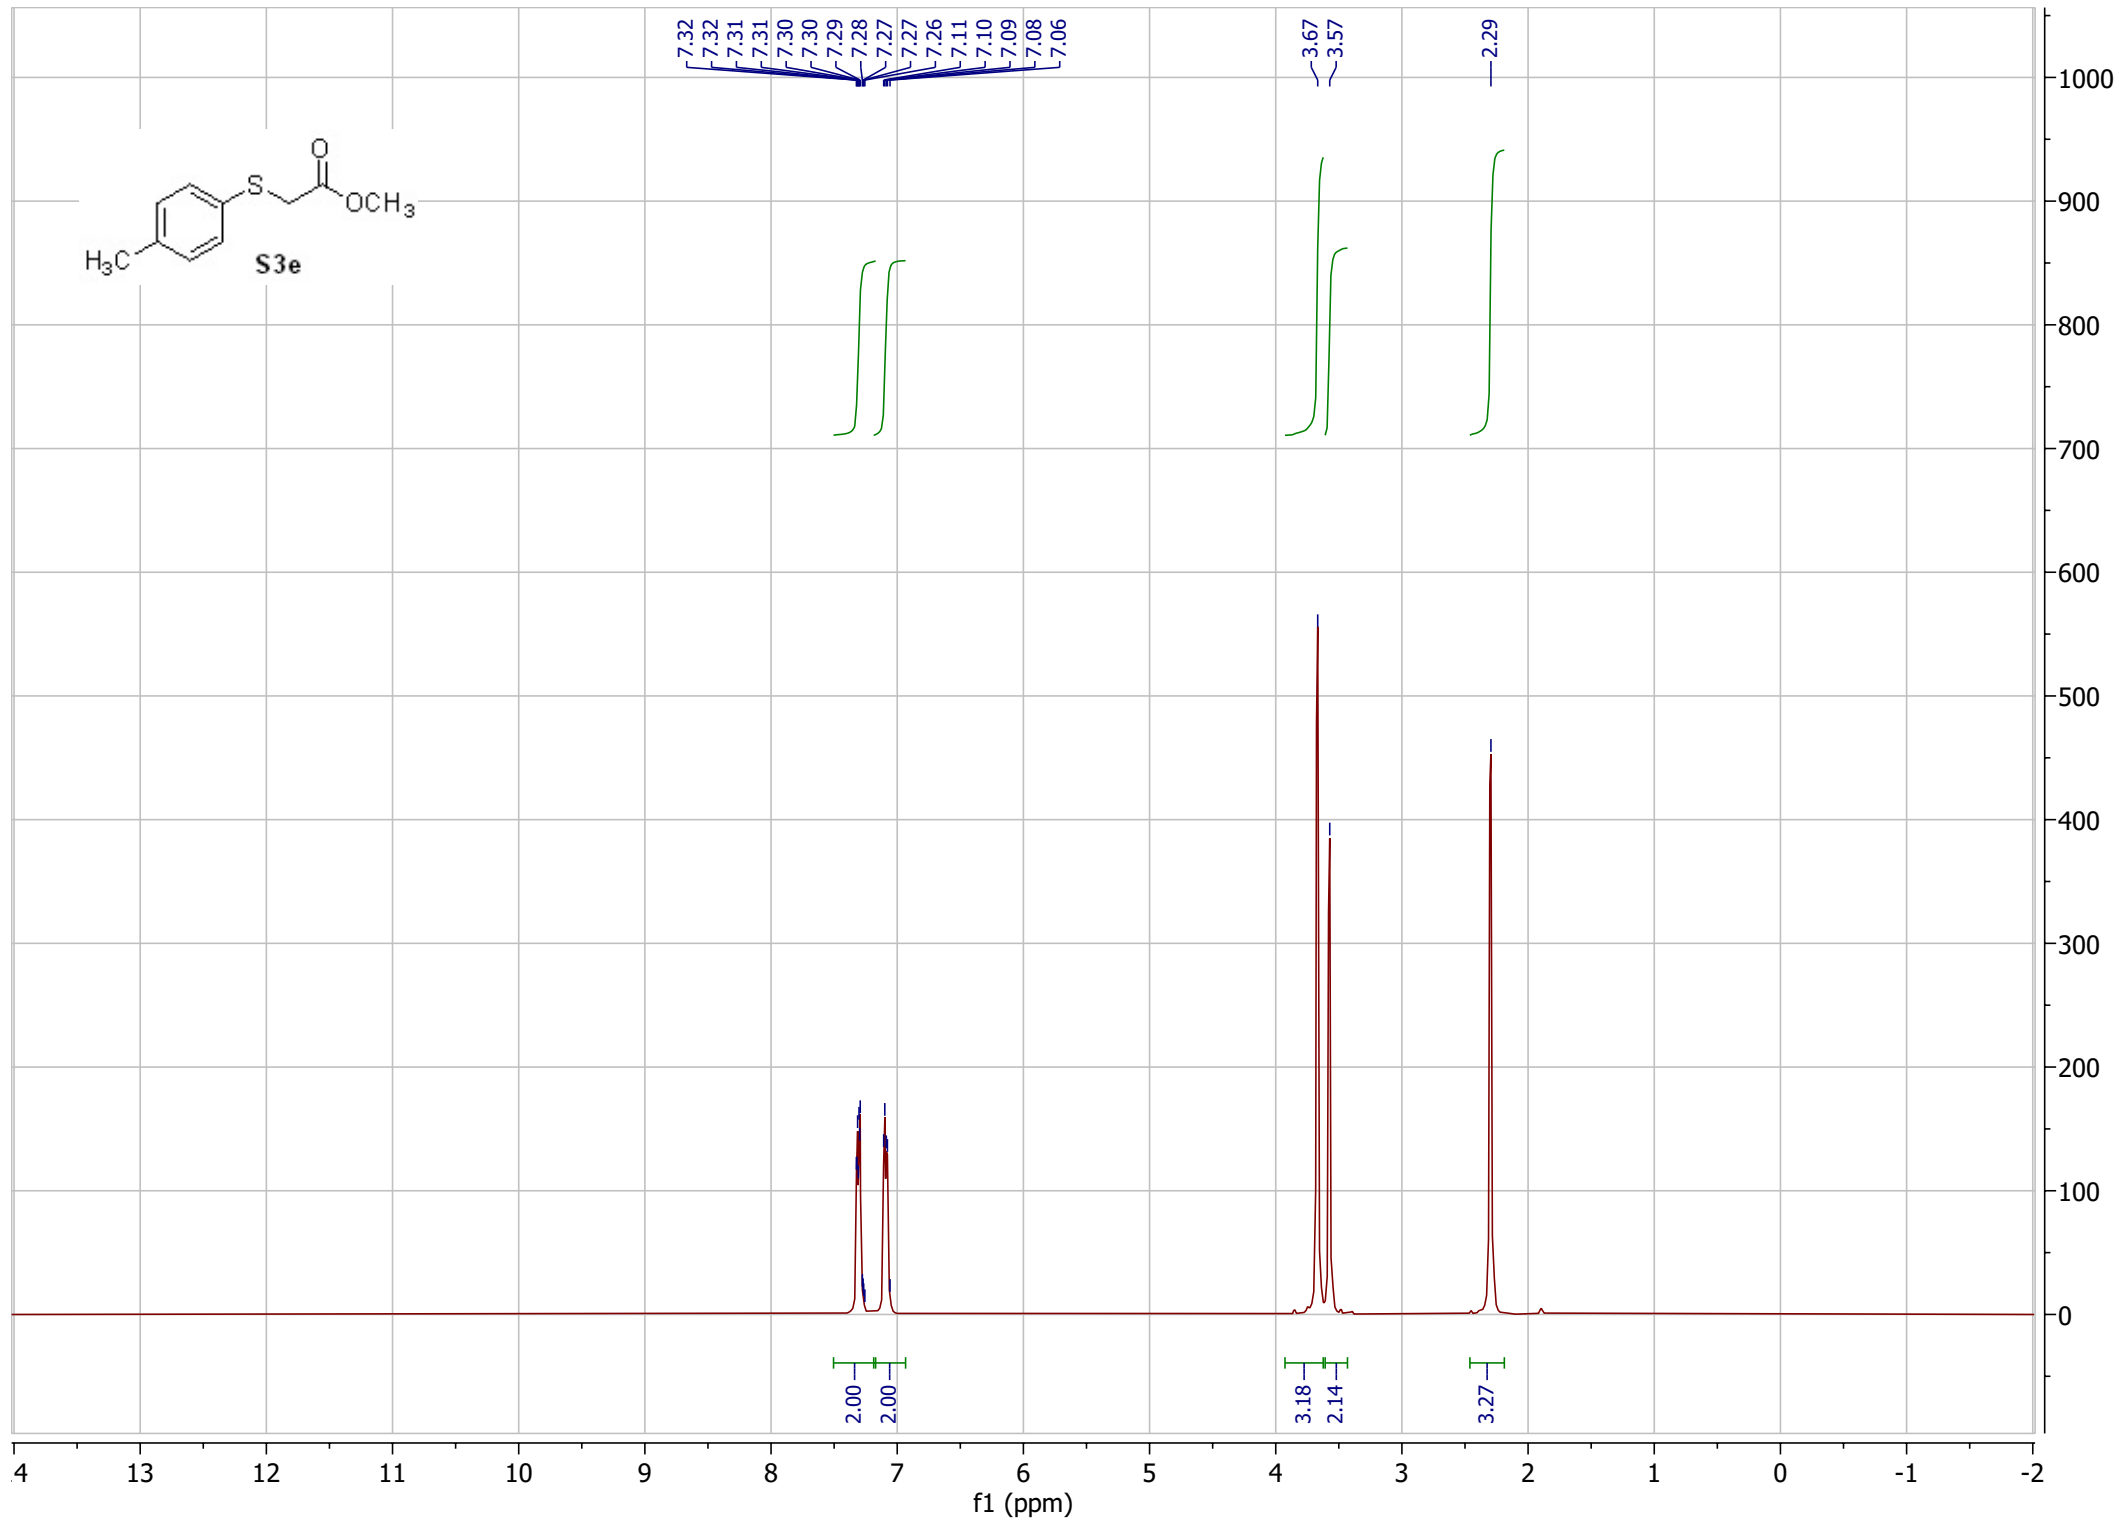

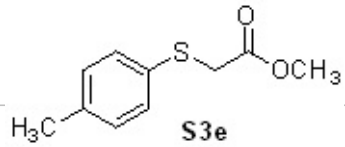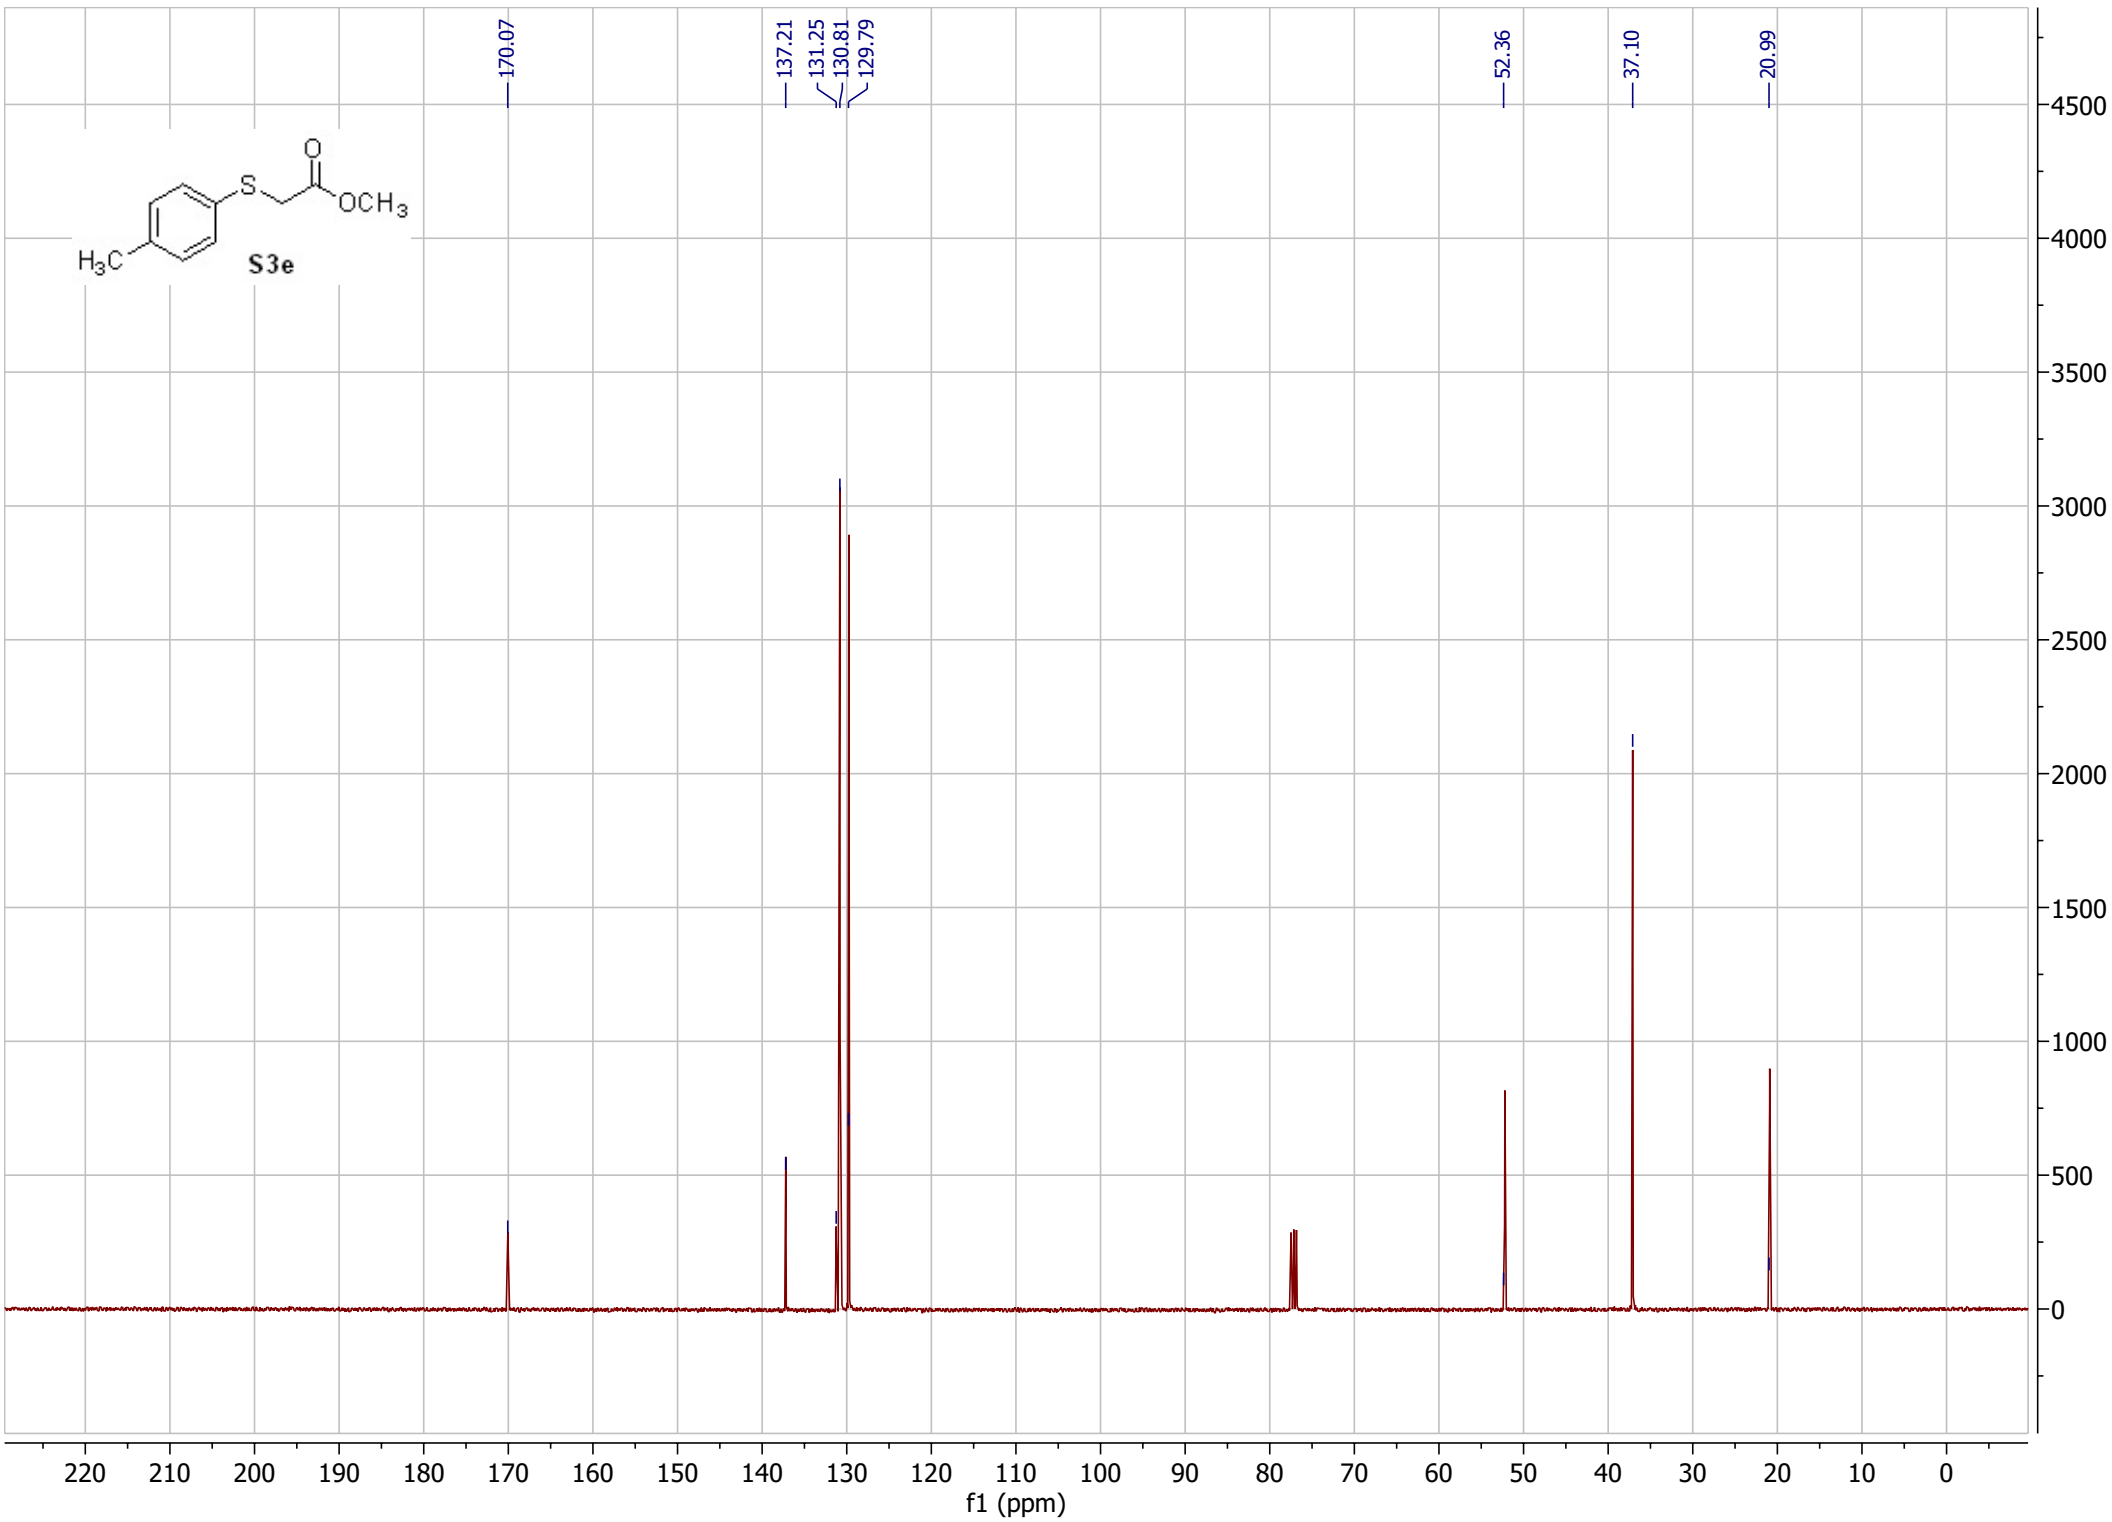

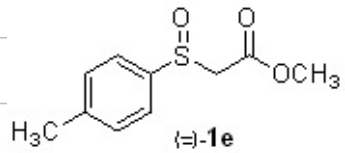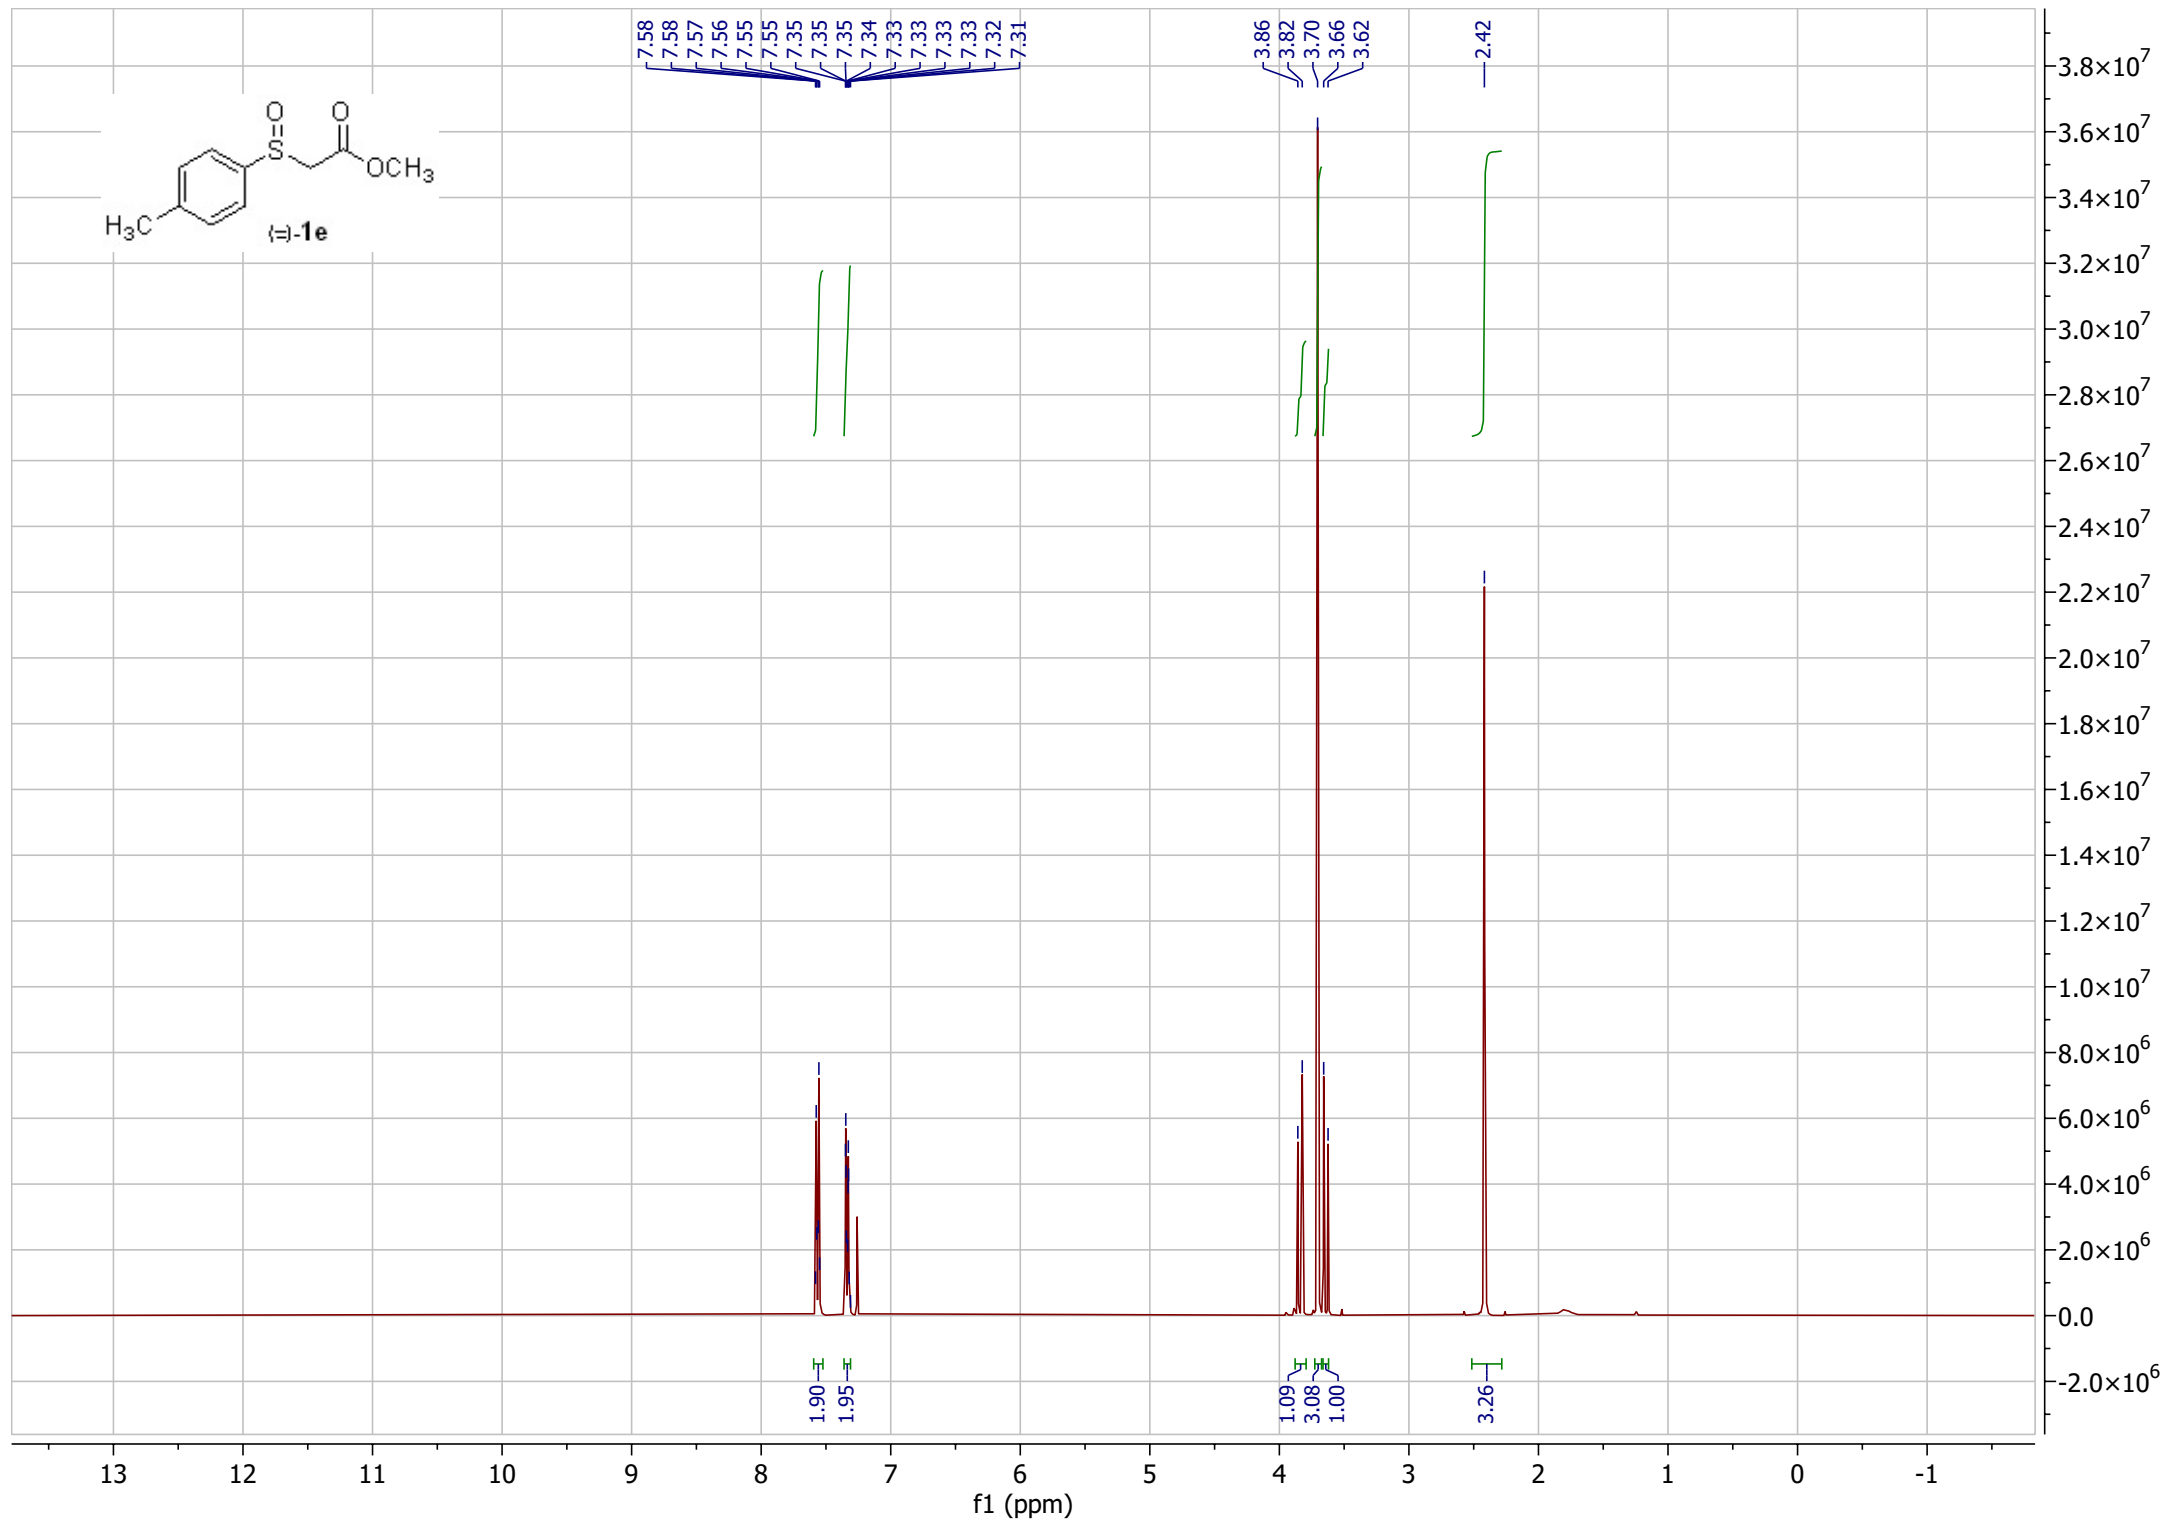

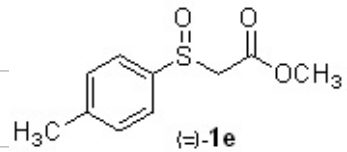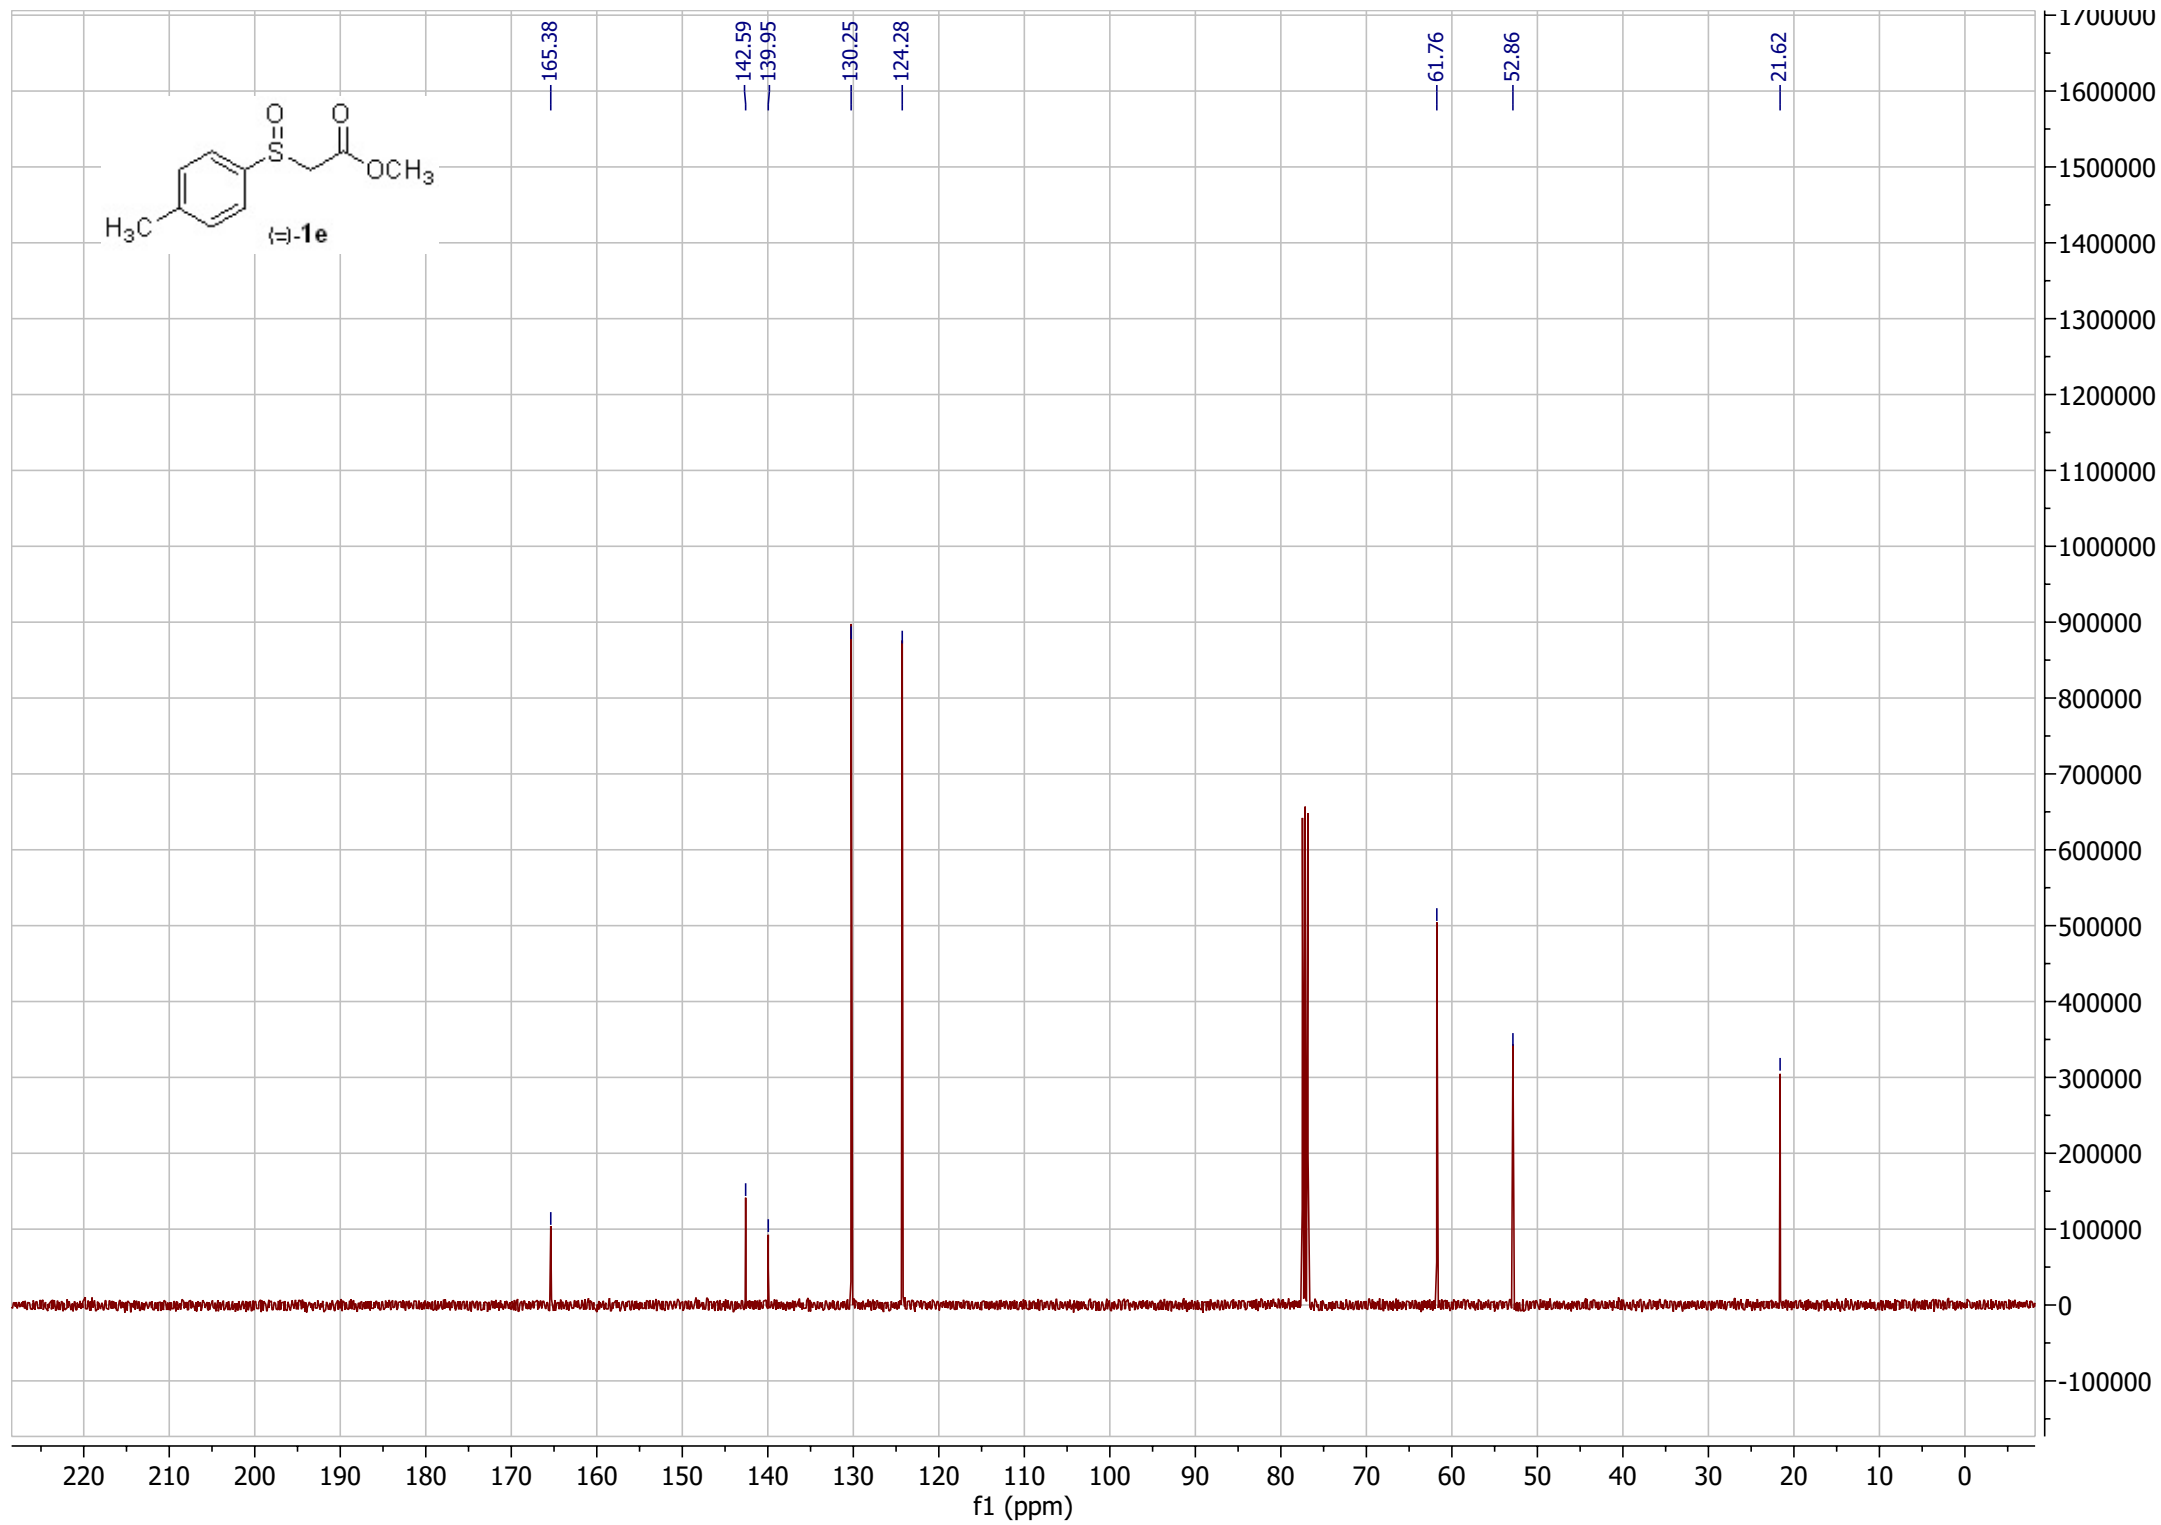



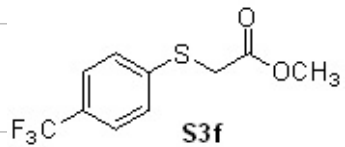

7.55  
7.53  
7.45  
7.43

3.74  
3.72

2.00  
2.00

3.05  
2.28

f1 (ppm)

6.0x10<sup>7</sup>  
5.5x10<sup>7</sup>  
5.0x10<sup>7</sup>  
4.5x10<sup>7</sup>  
4.0x10<sup>7</sup>  
3.5x10<sup>7</sup>  
3.0x10<sup>7</sup>  
2.5x10<sup>7</sup>  
2.0x10<sup>7</sup>  
1.5x10<sup>7</sup>  
1.0x10<sup>7</sup>  
5.0x10<sup>6</sup>  
0.0  
-5.0x10<sup>6</sup>

13 12 11 10 9 8 7 6 5 4 3 2 1 0 -1

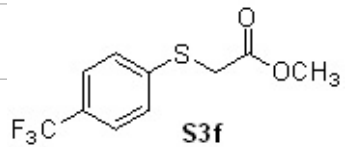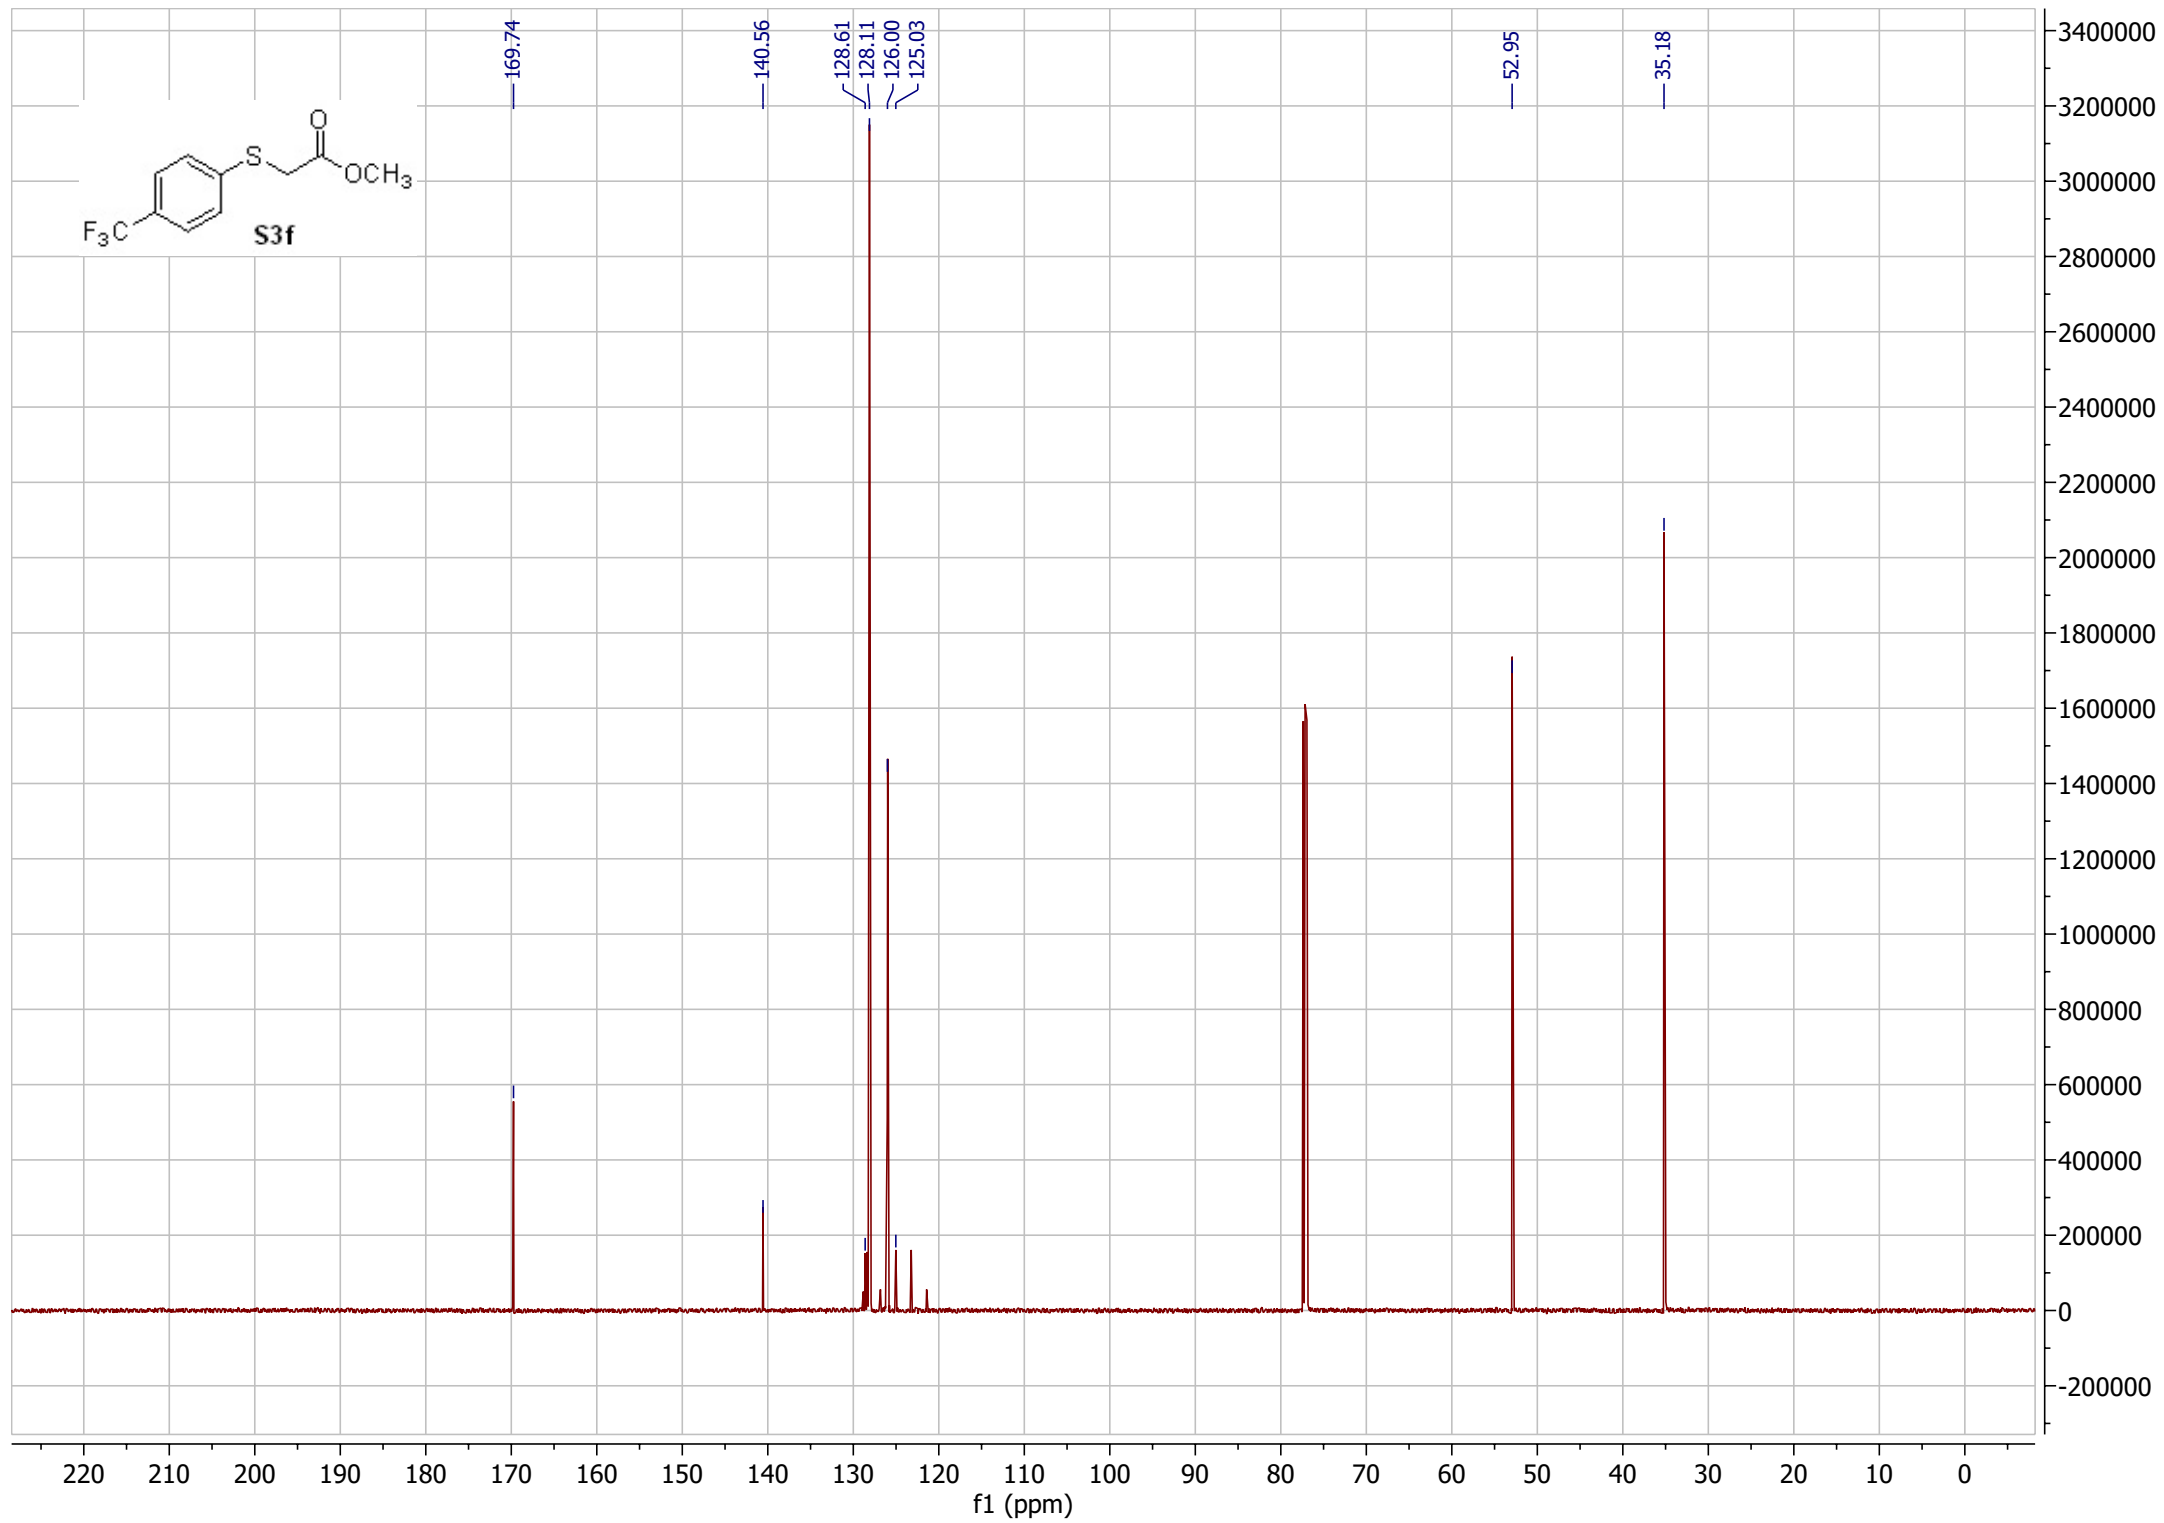

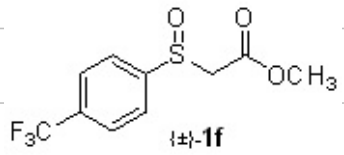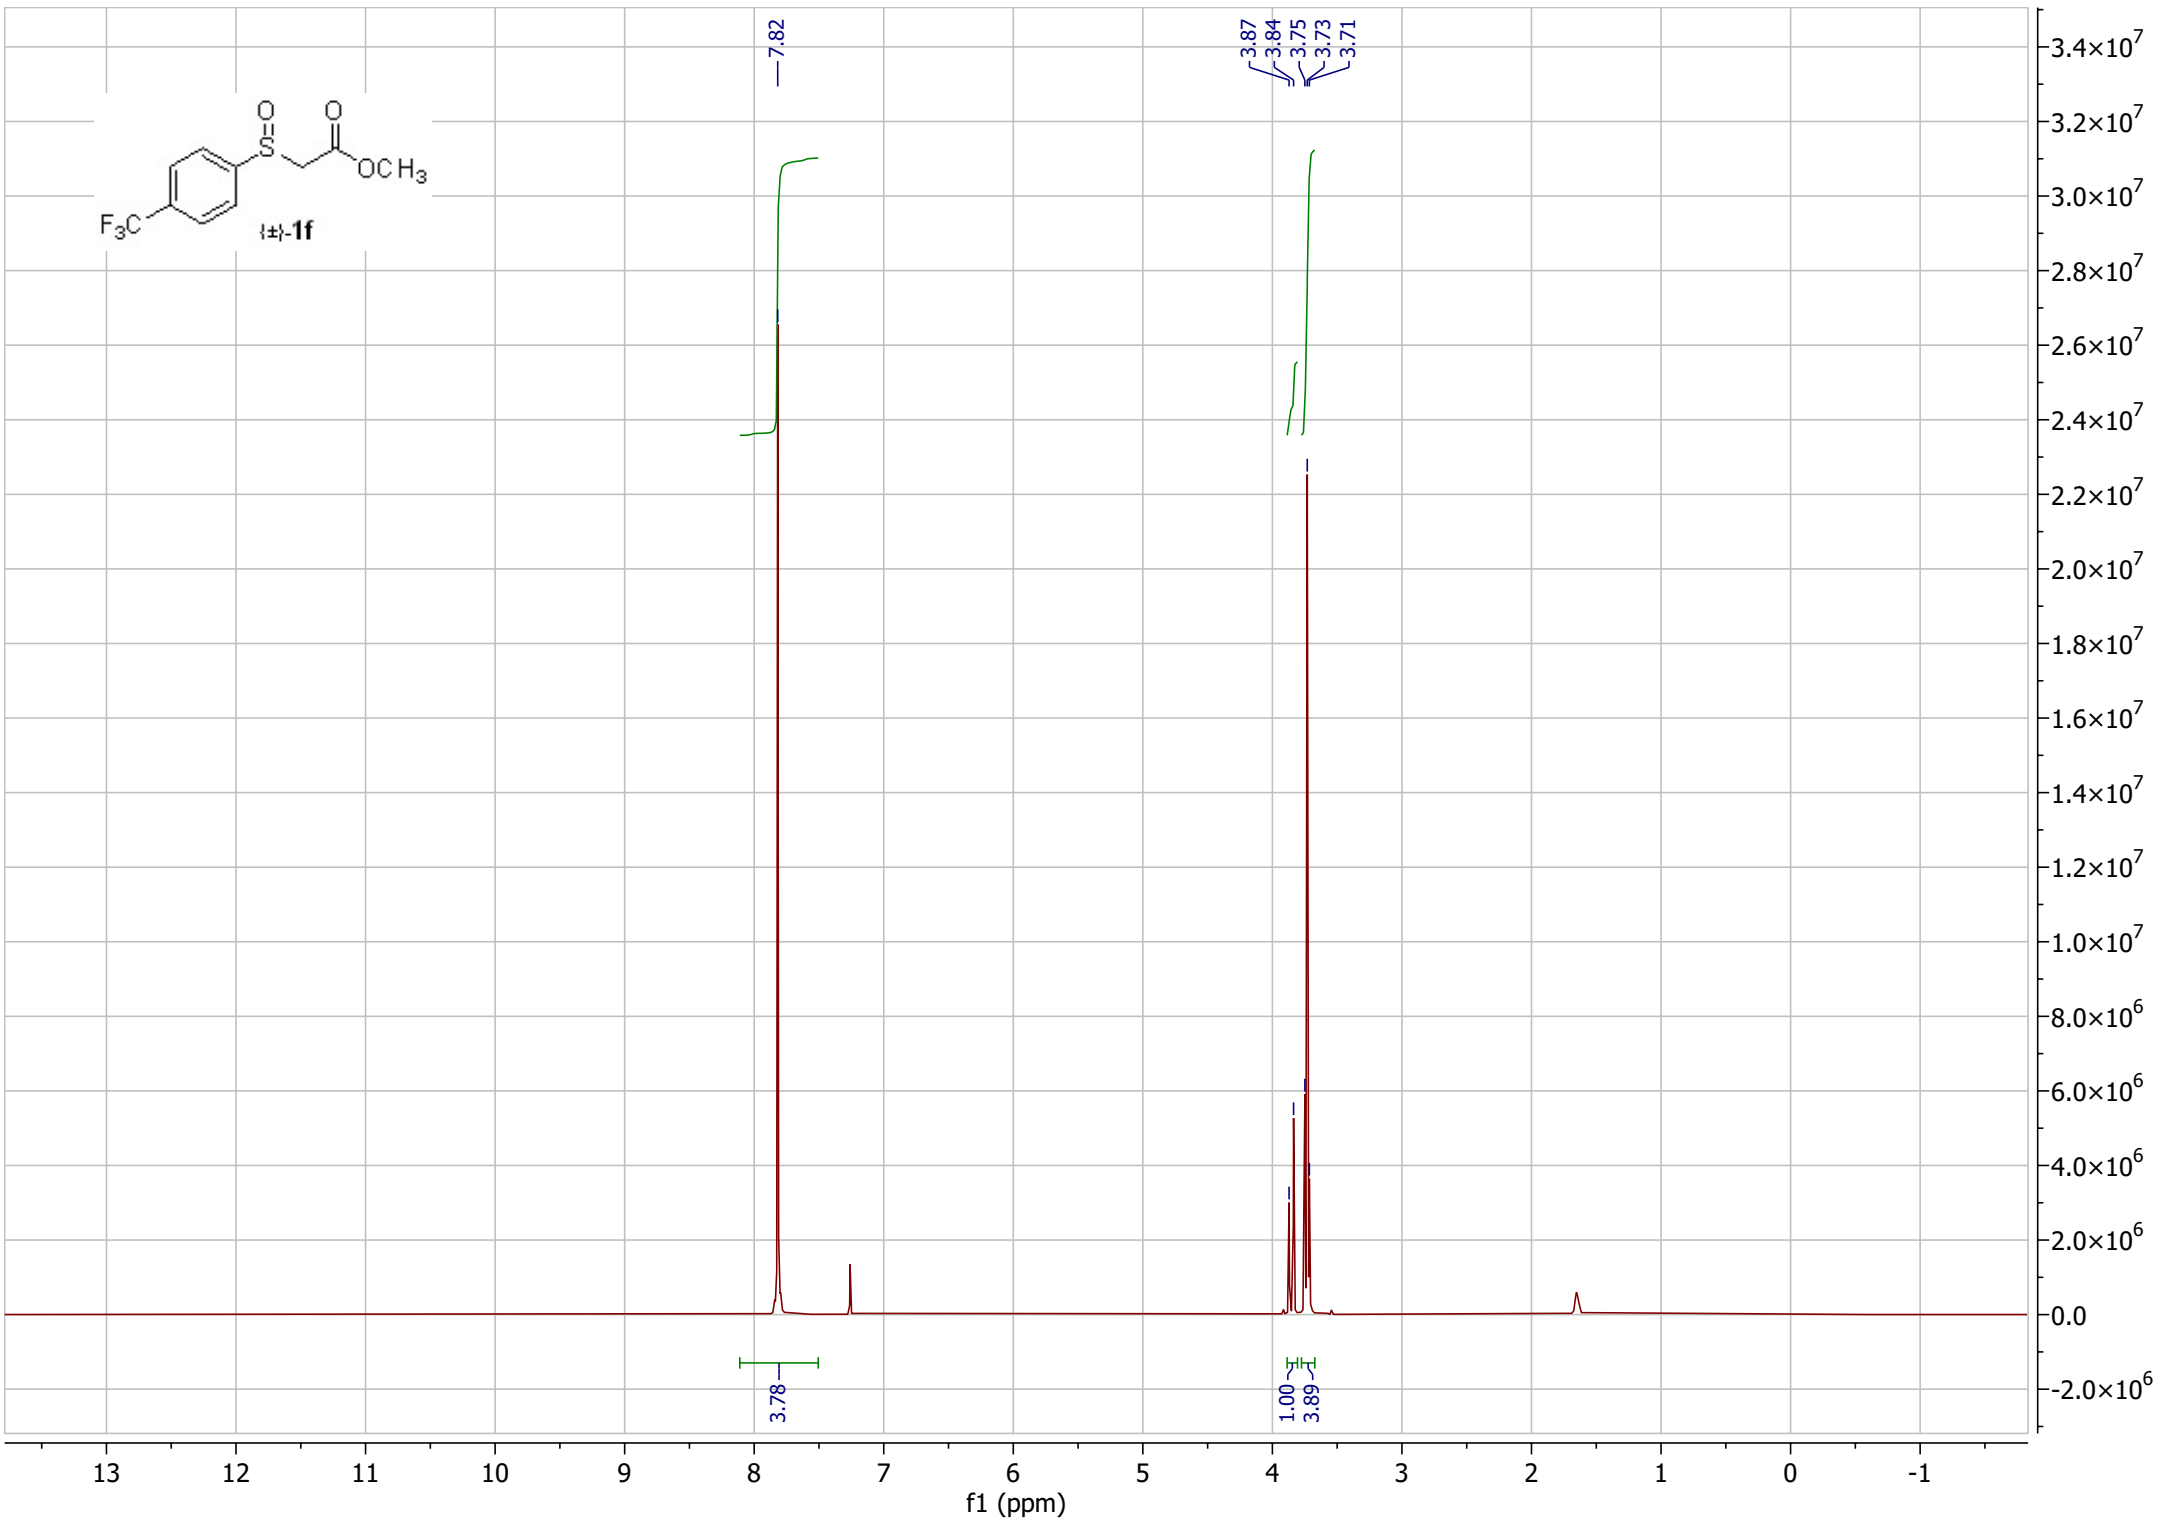

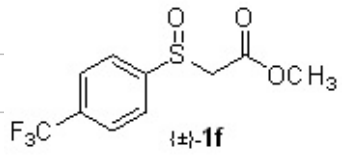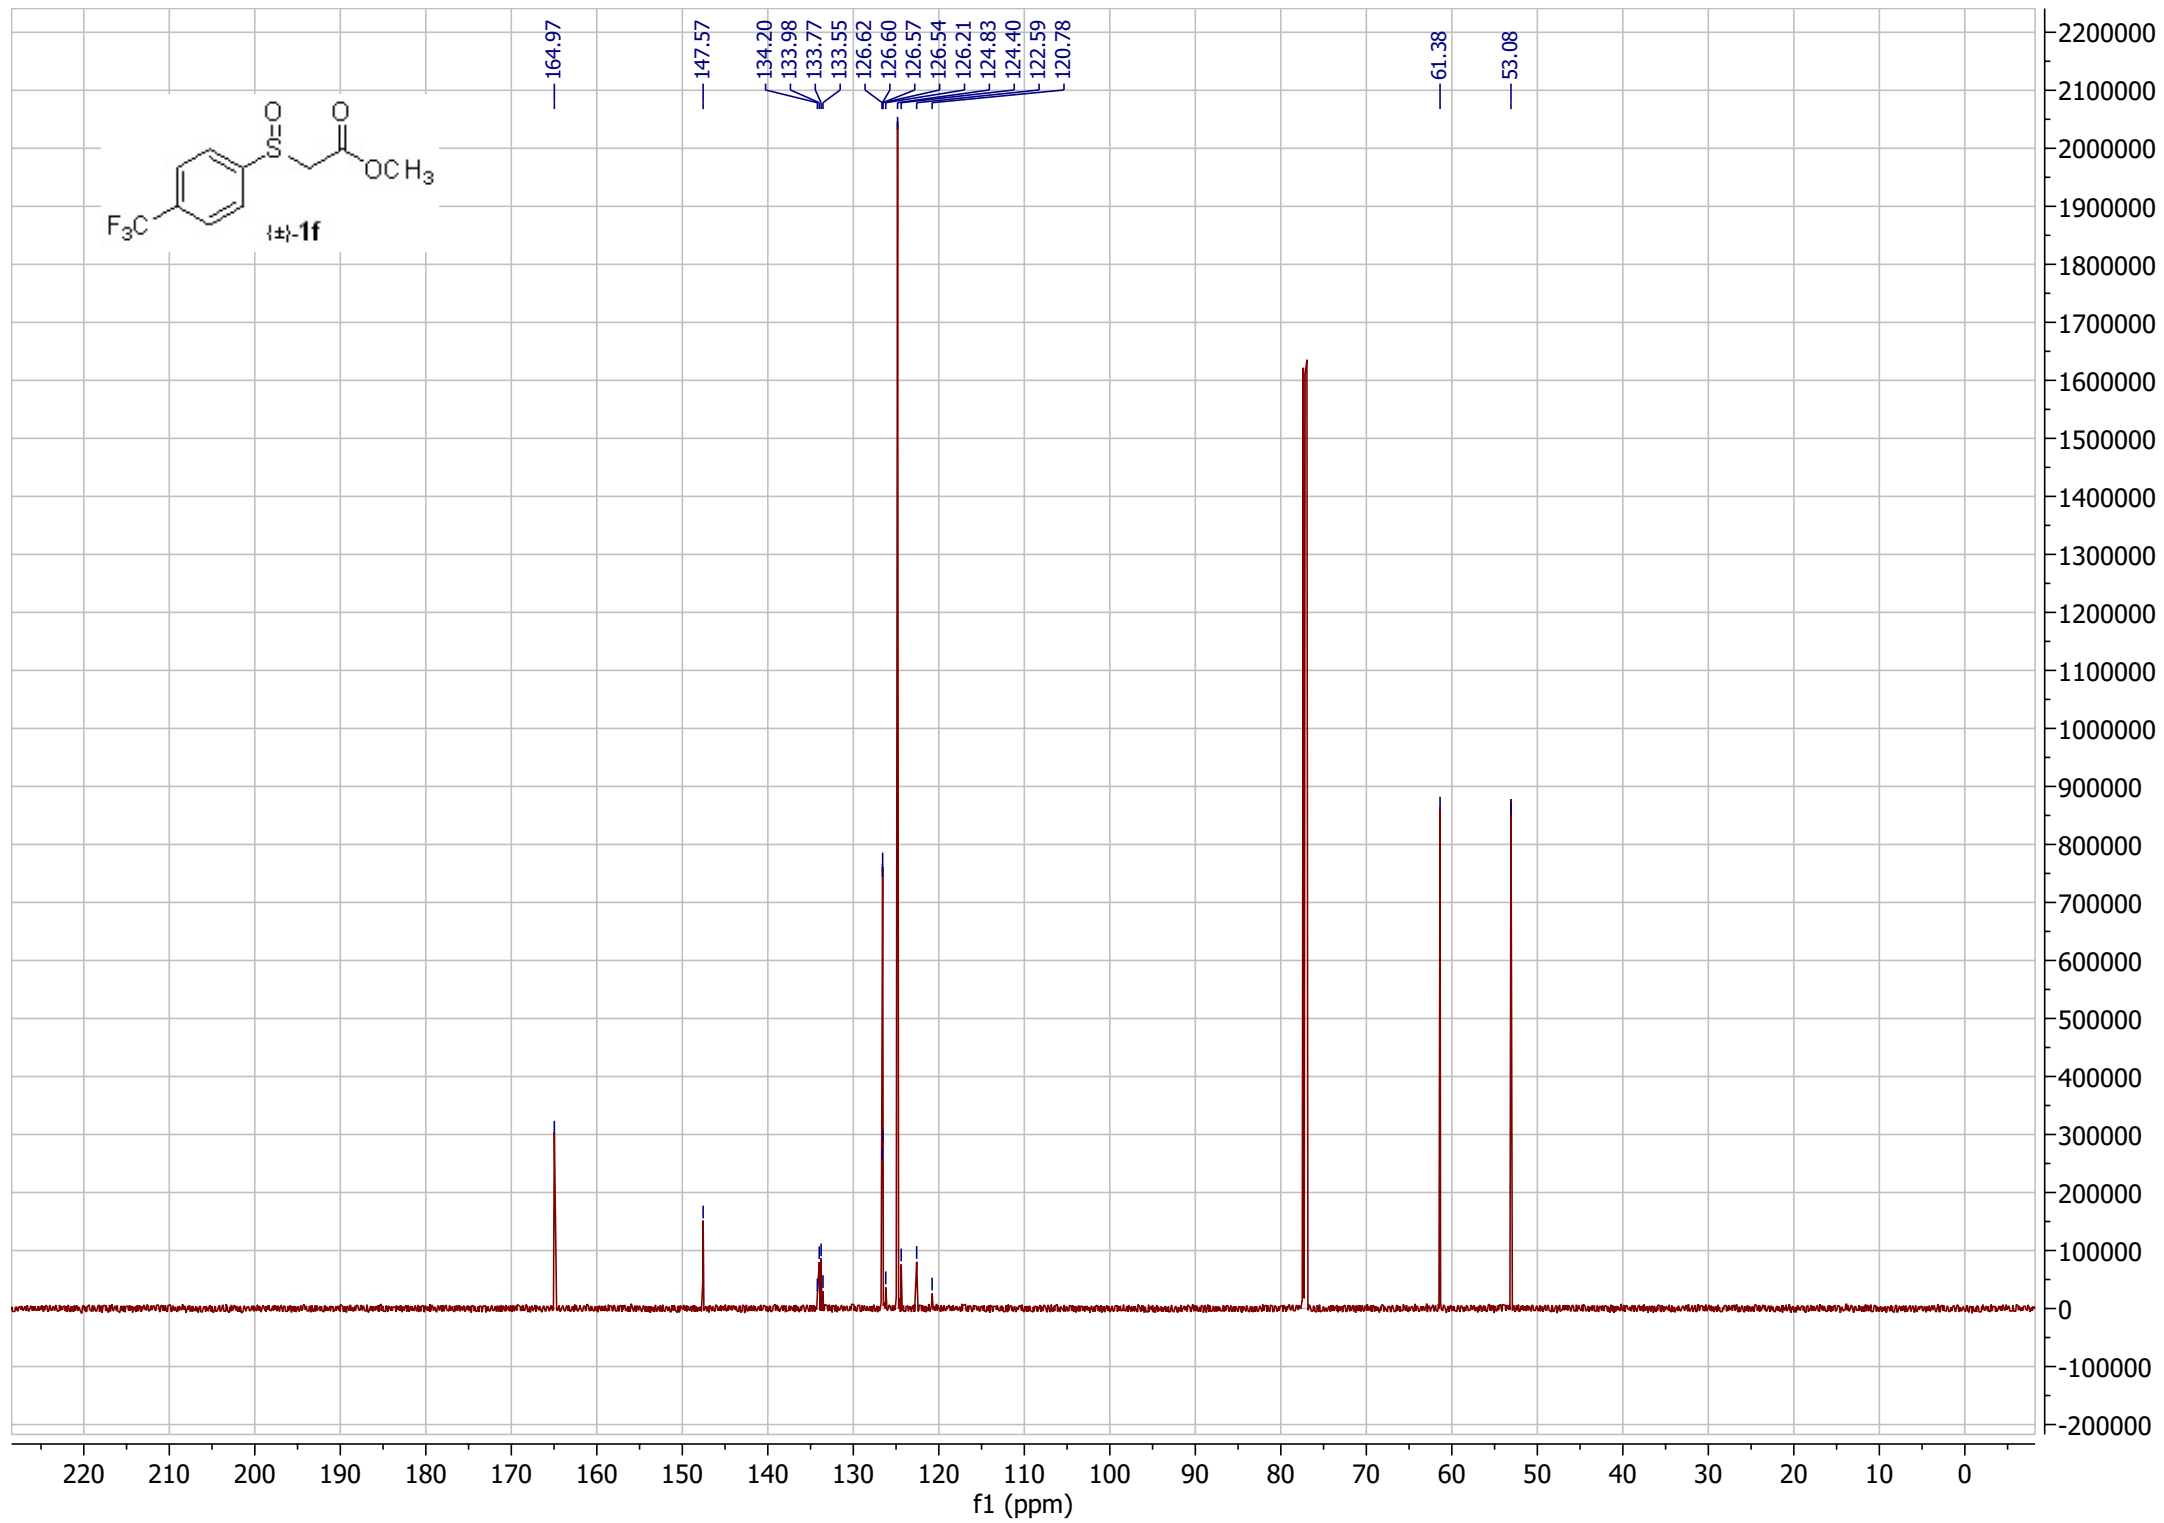

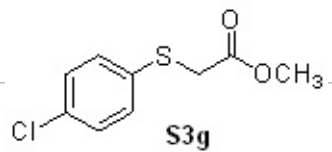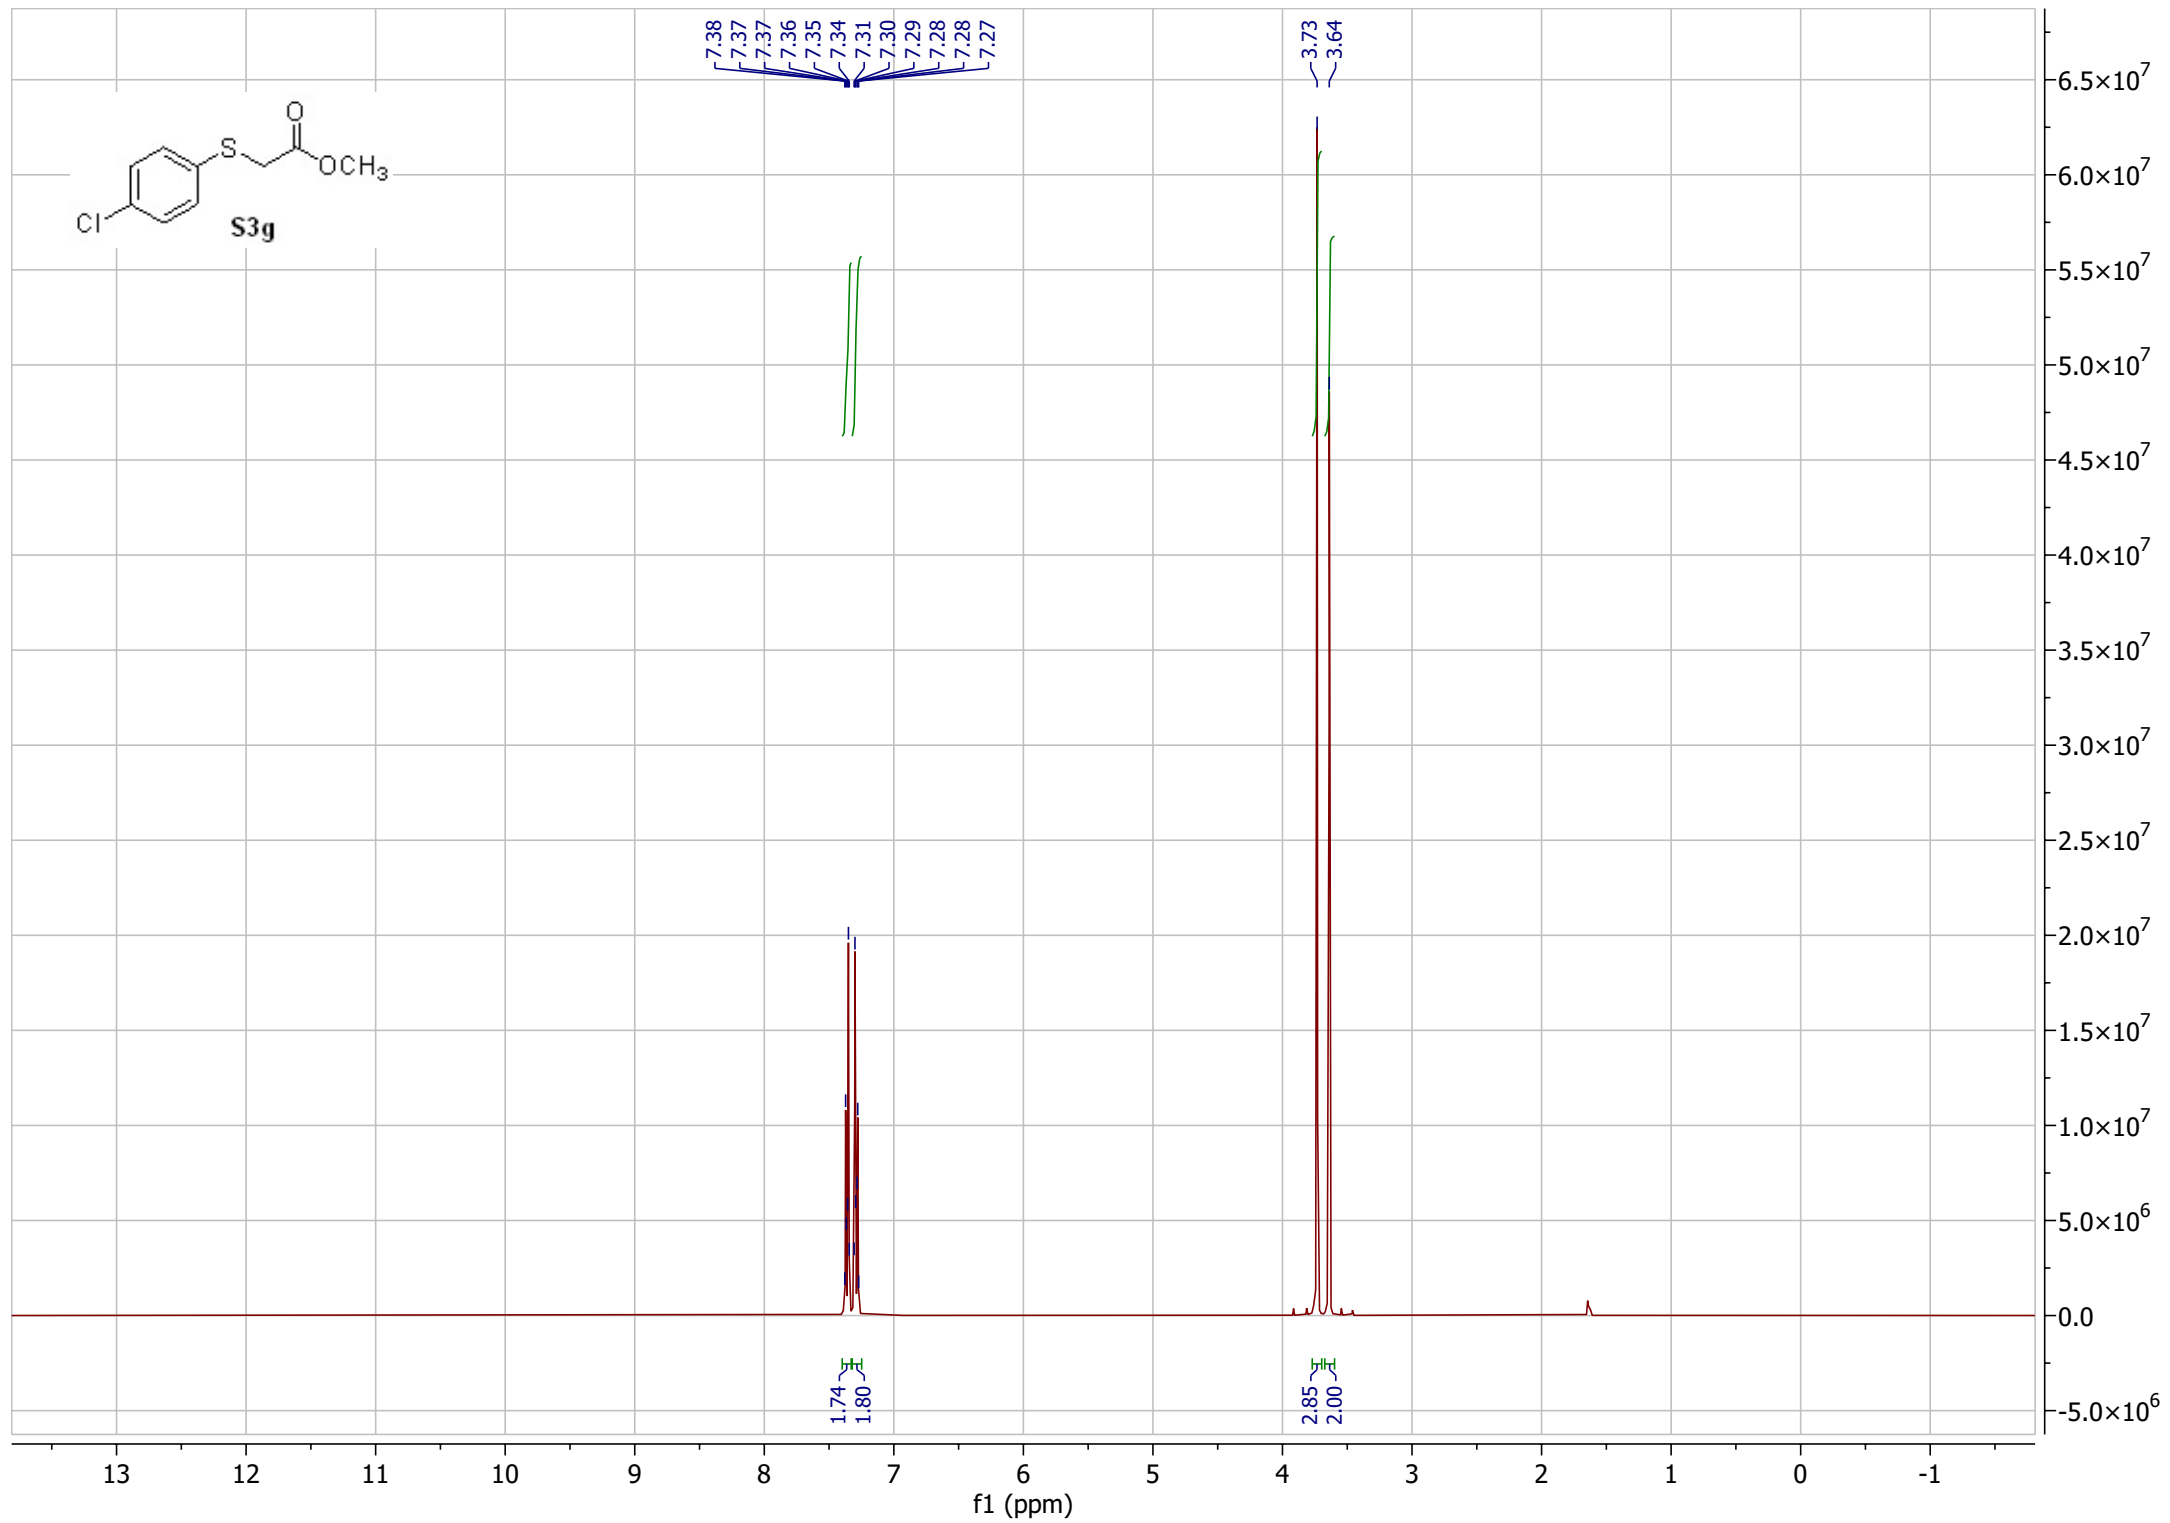

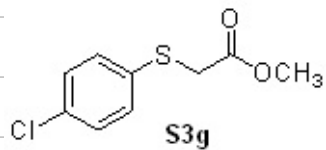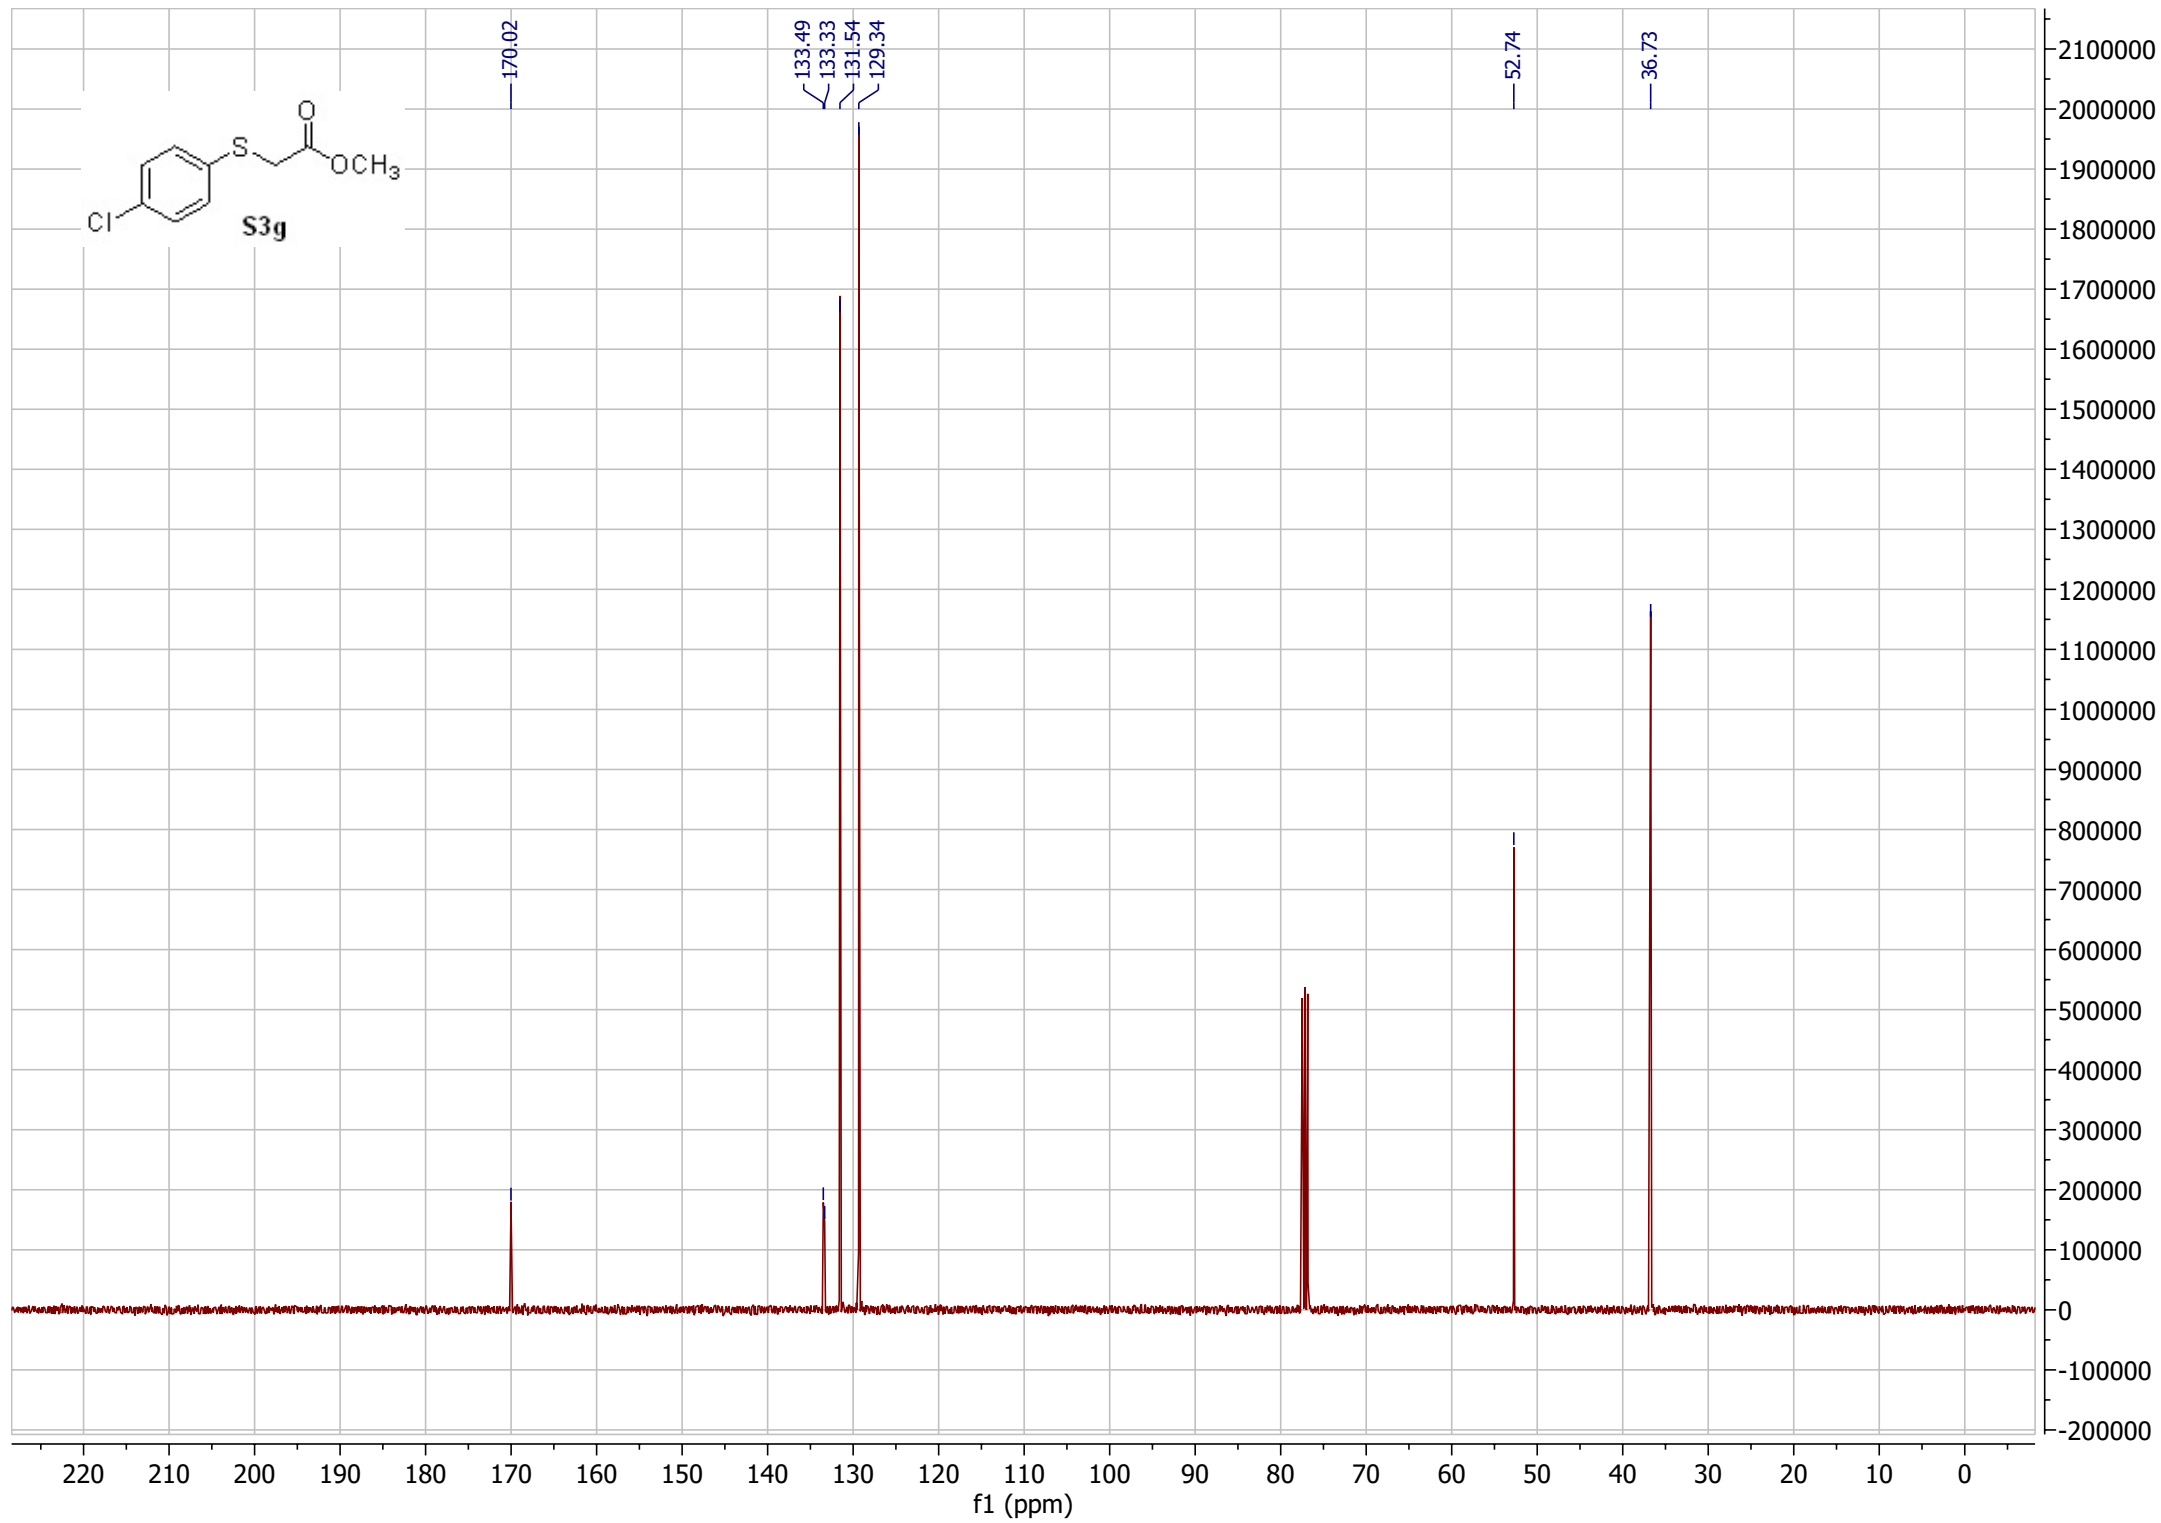

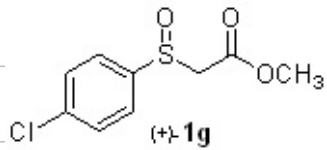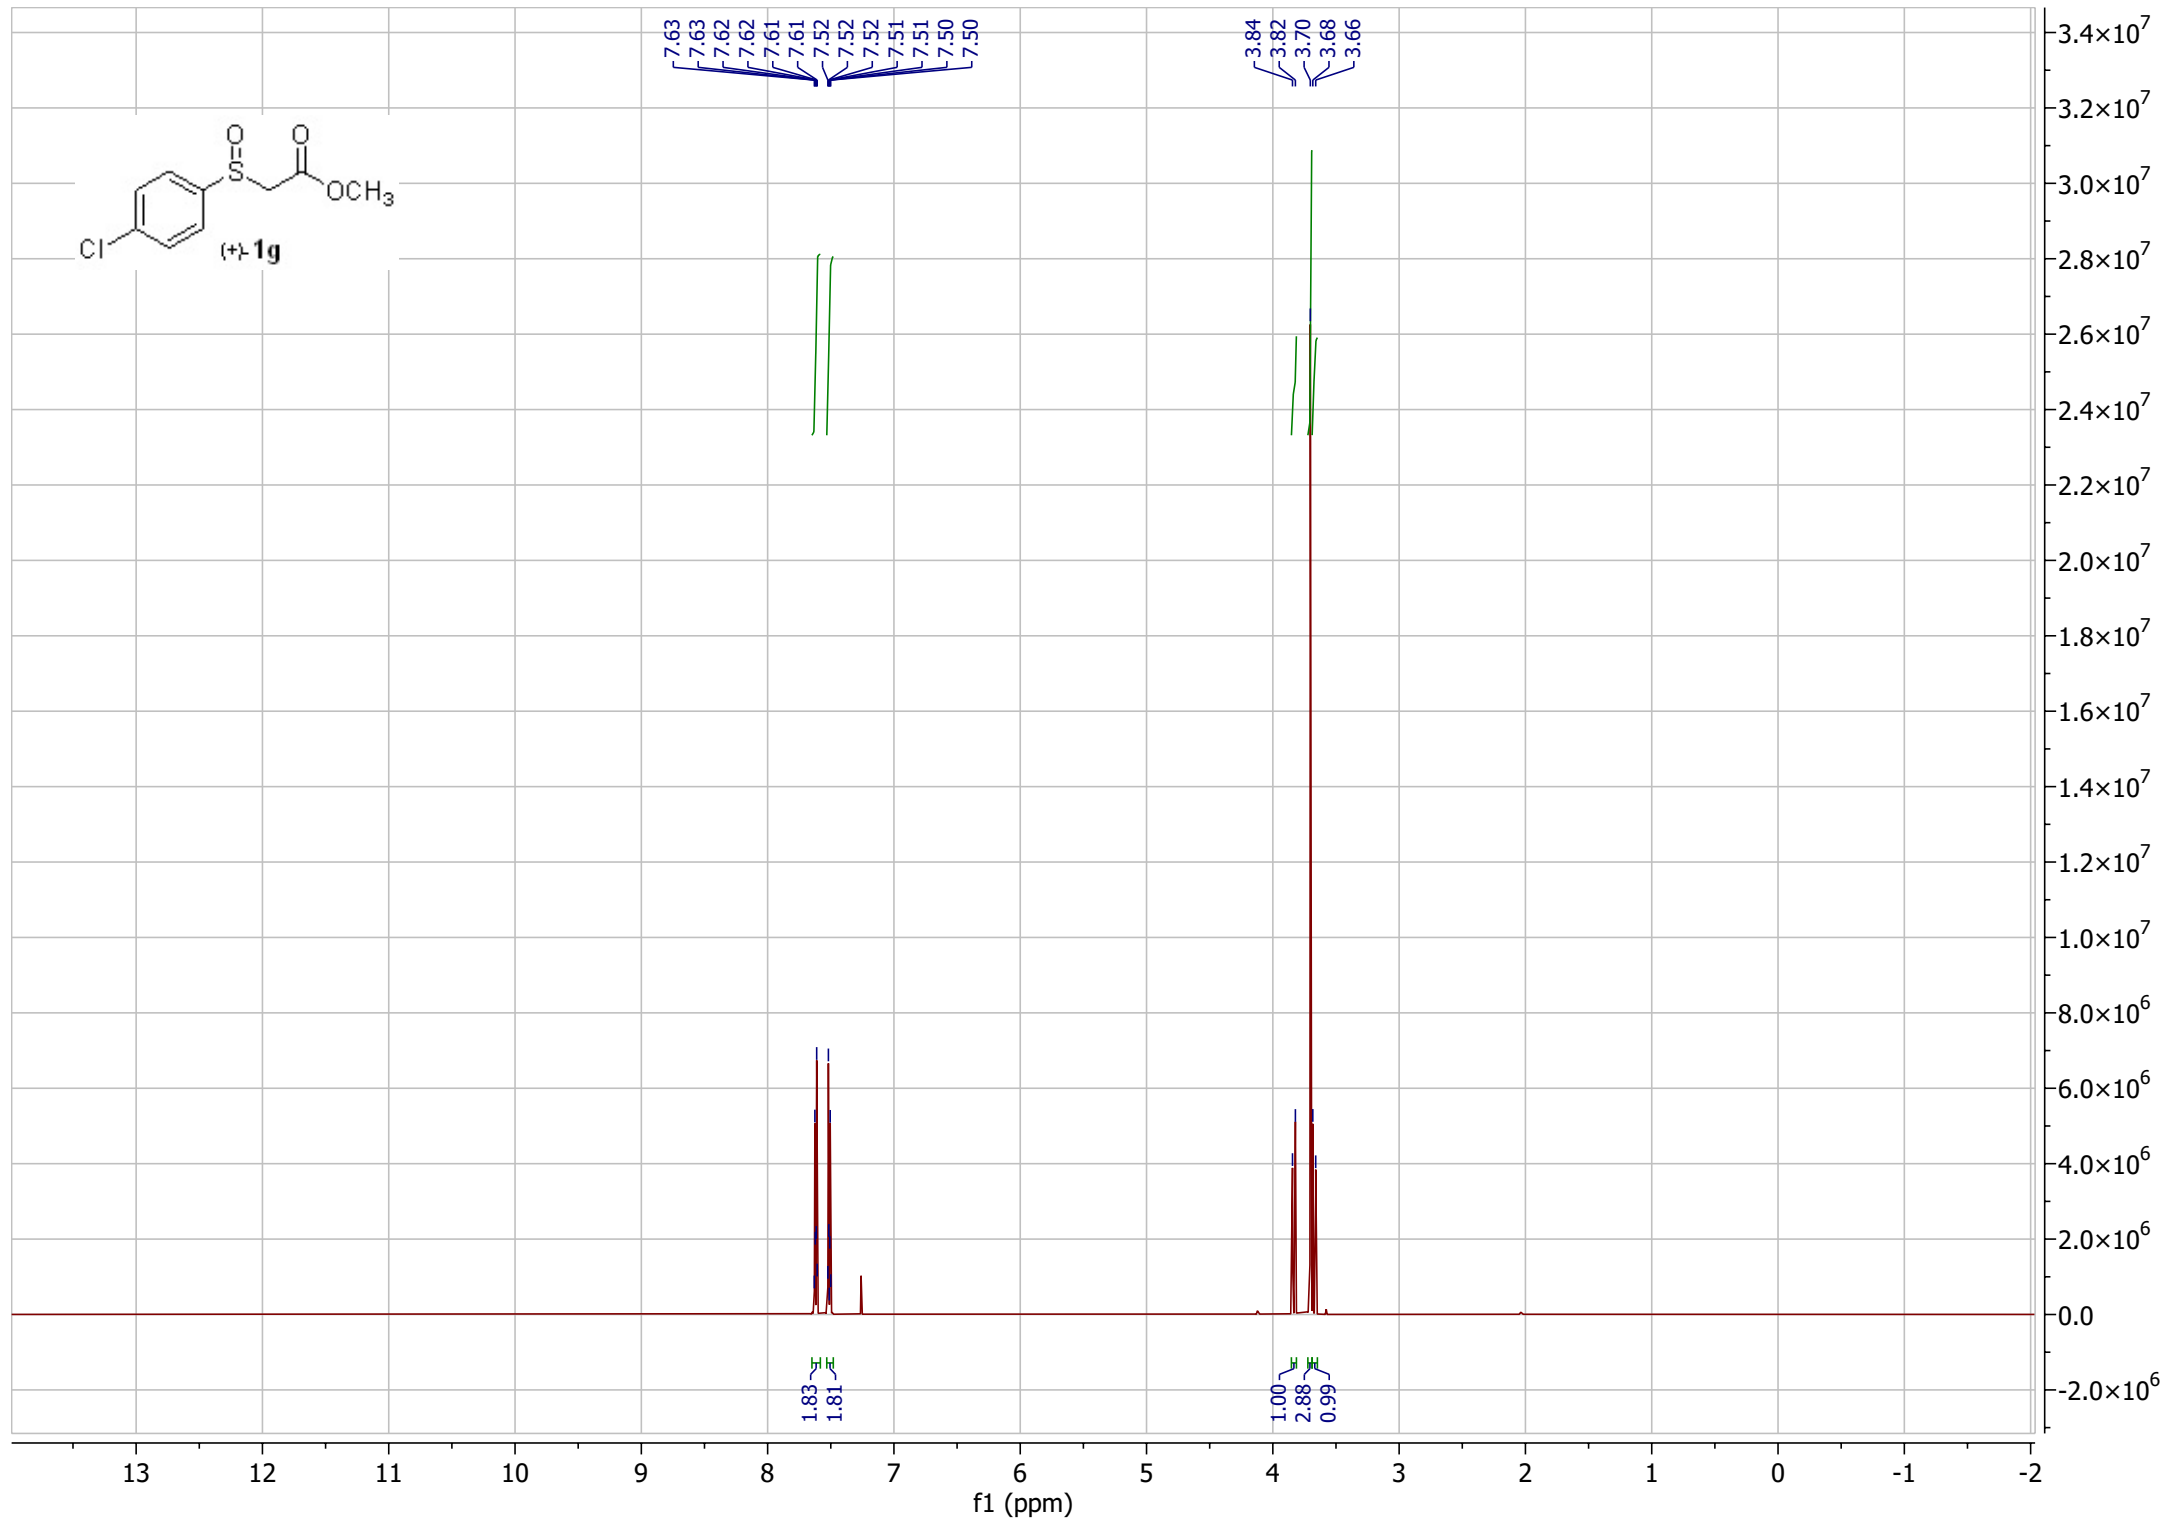

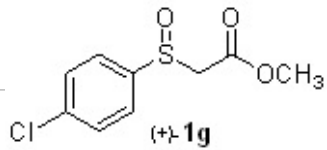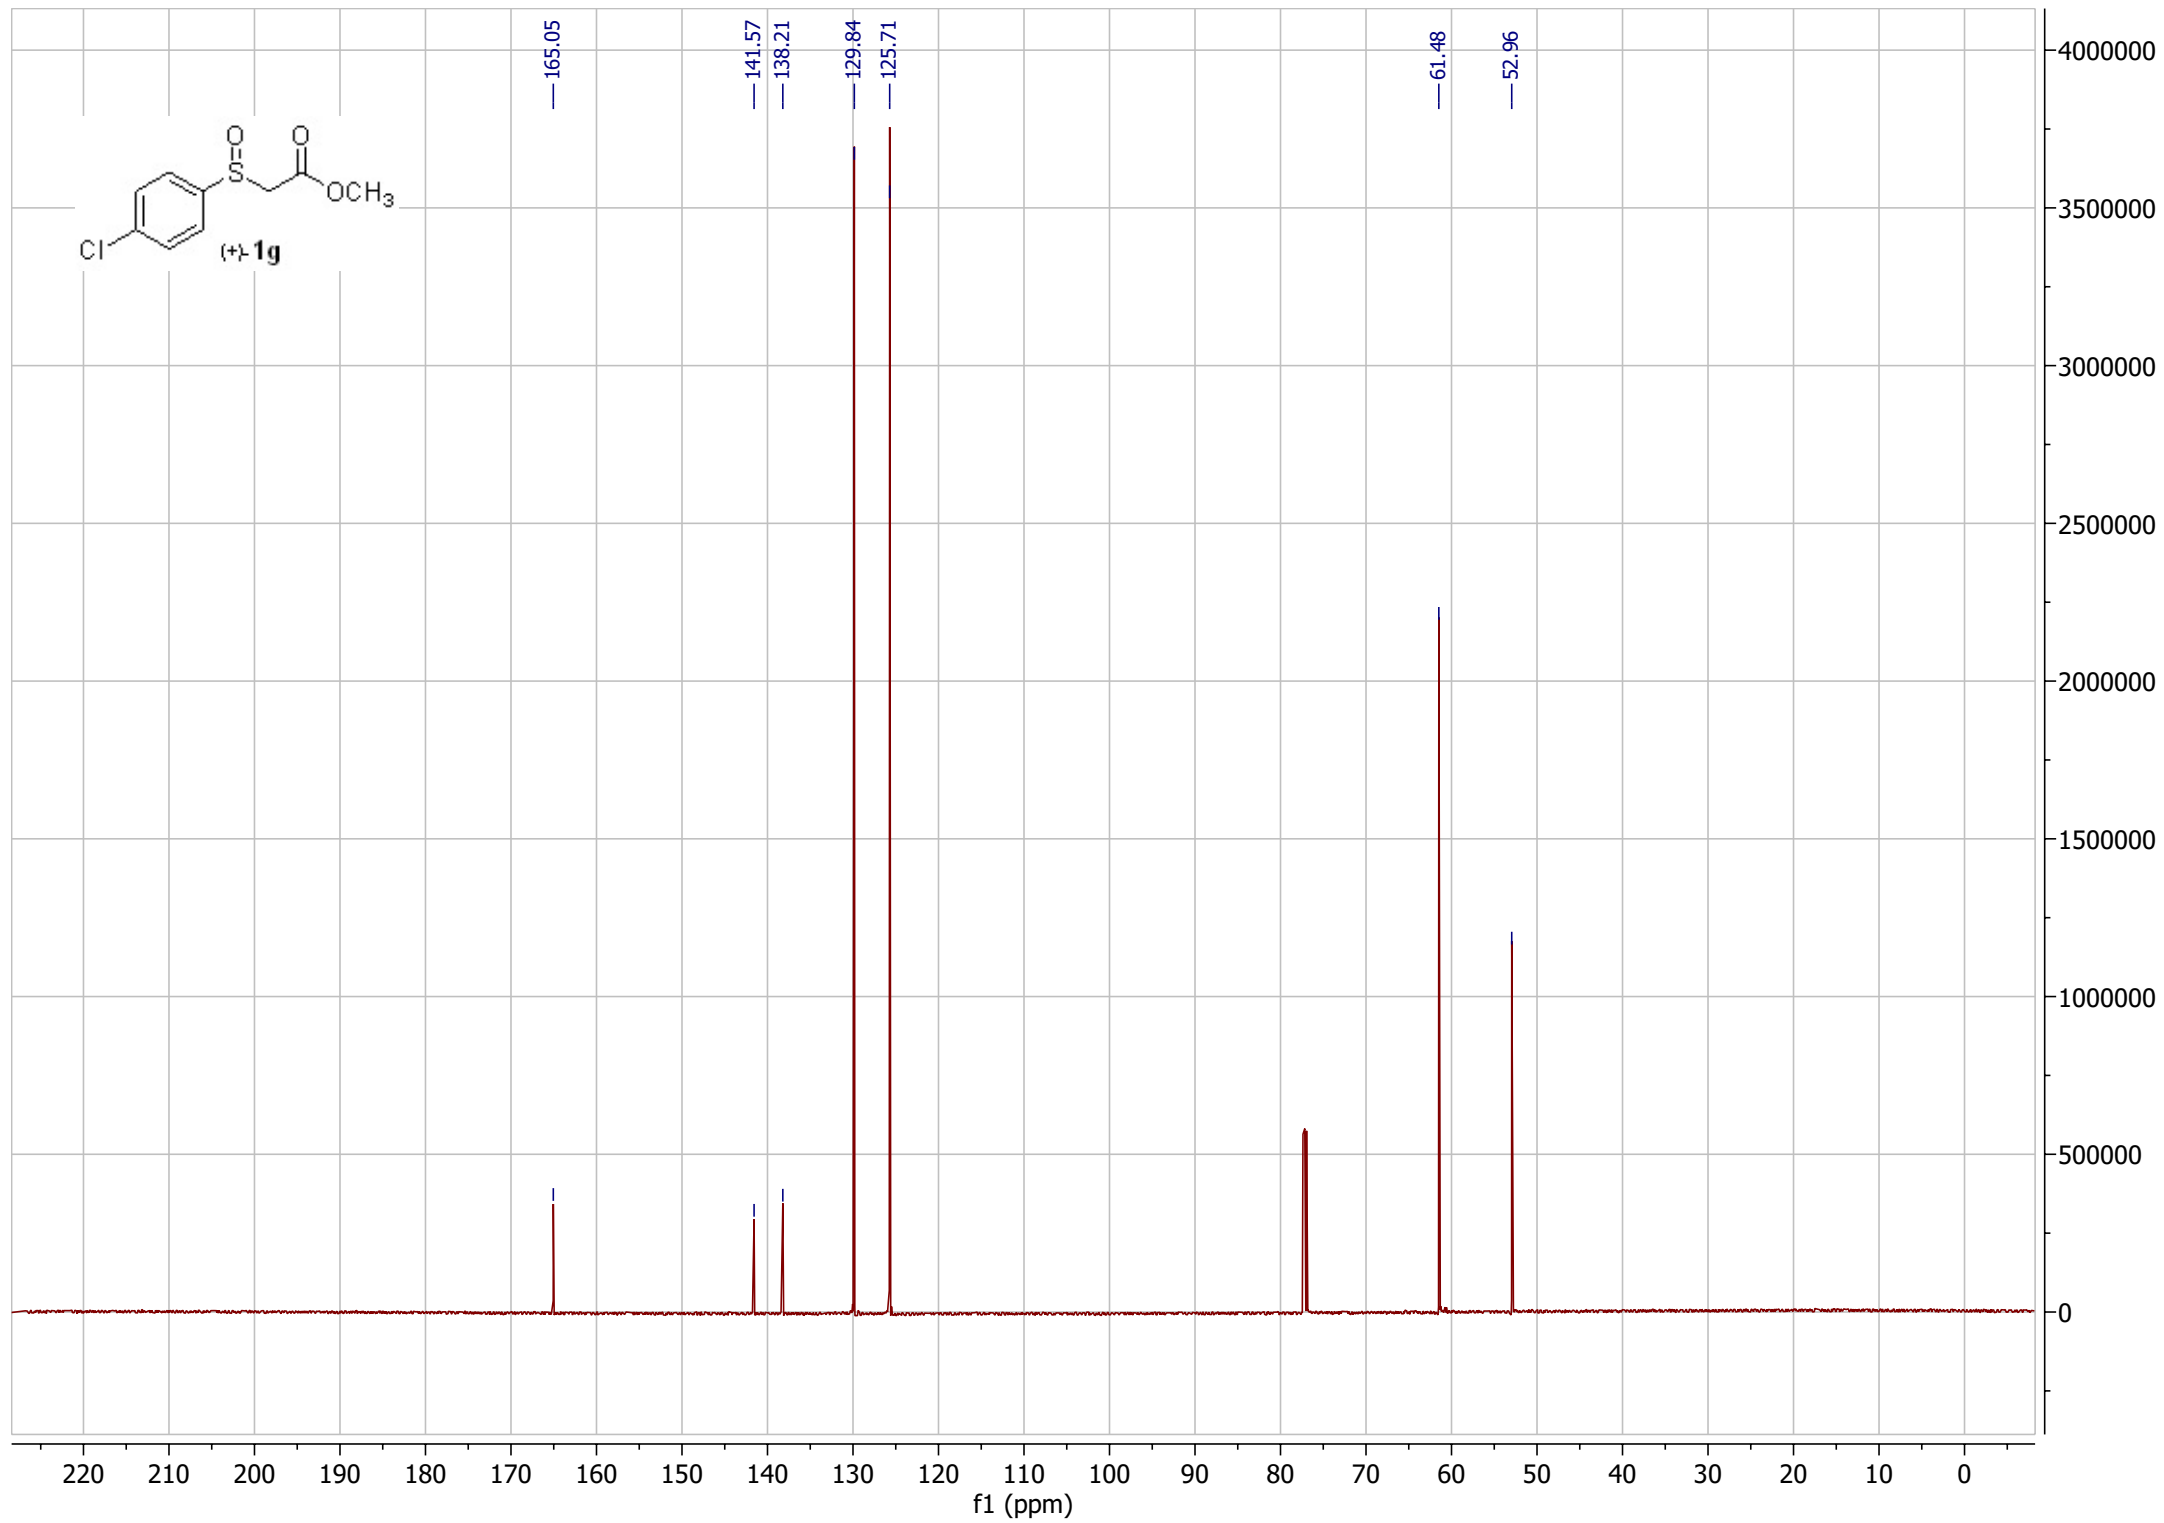



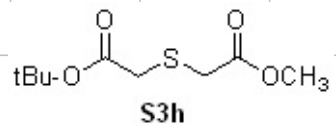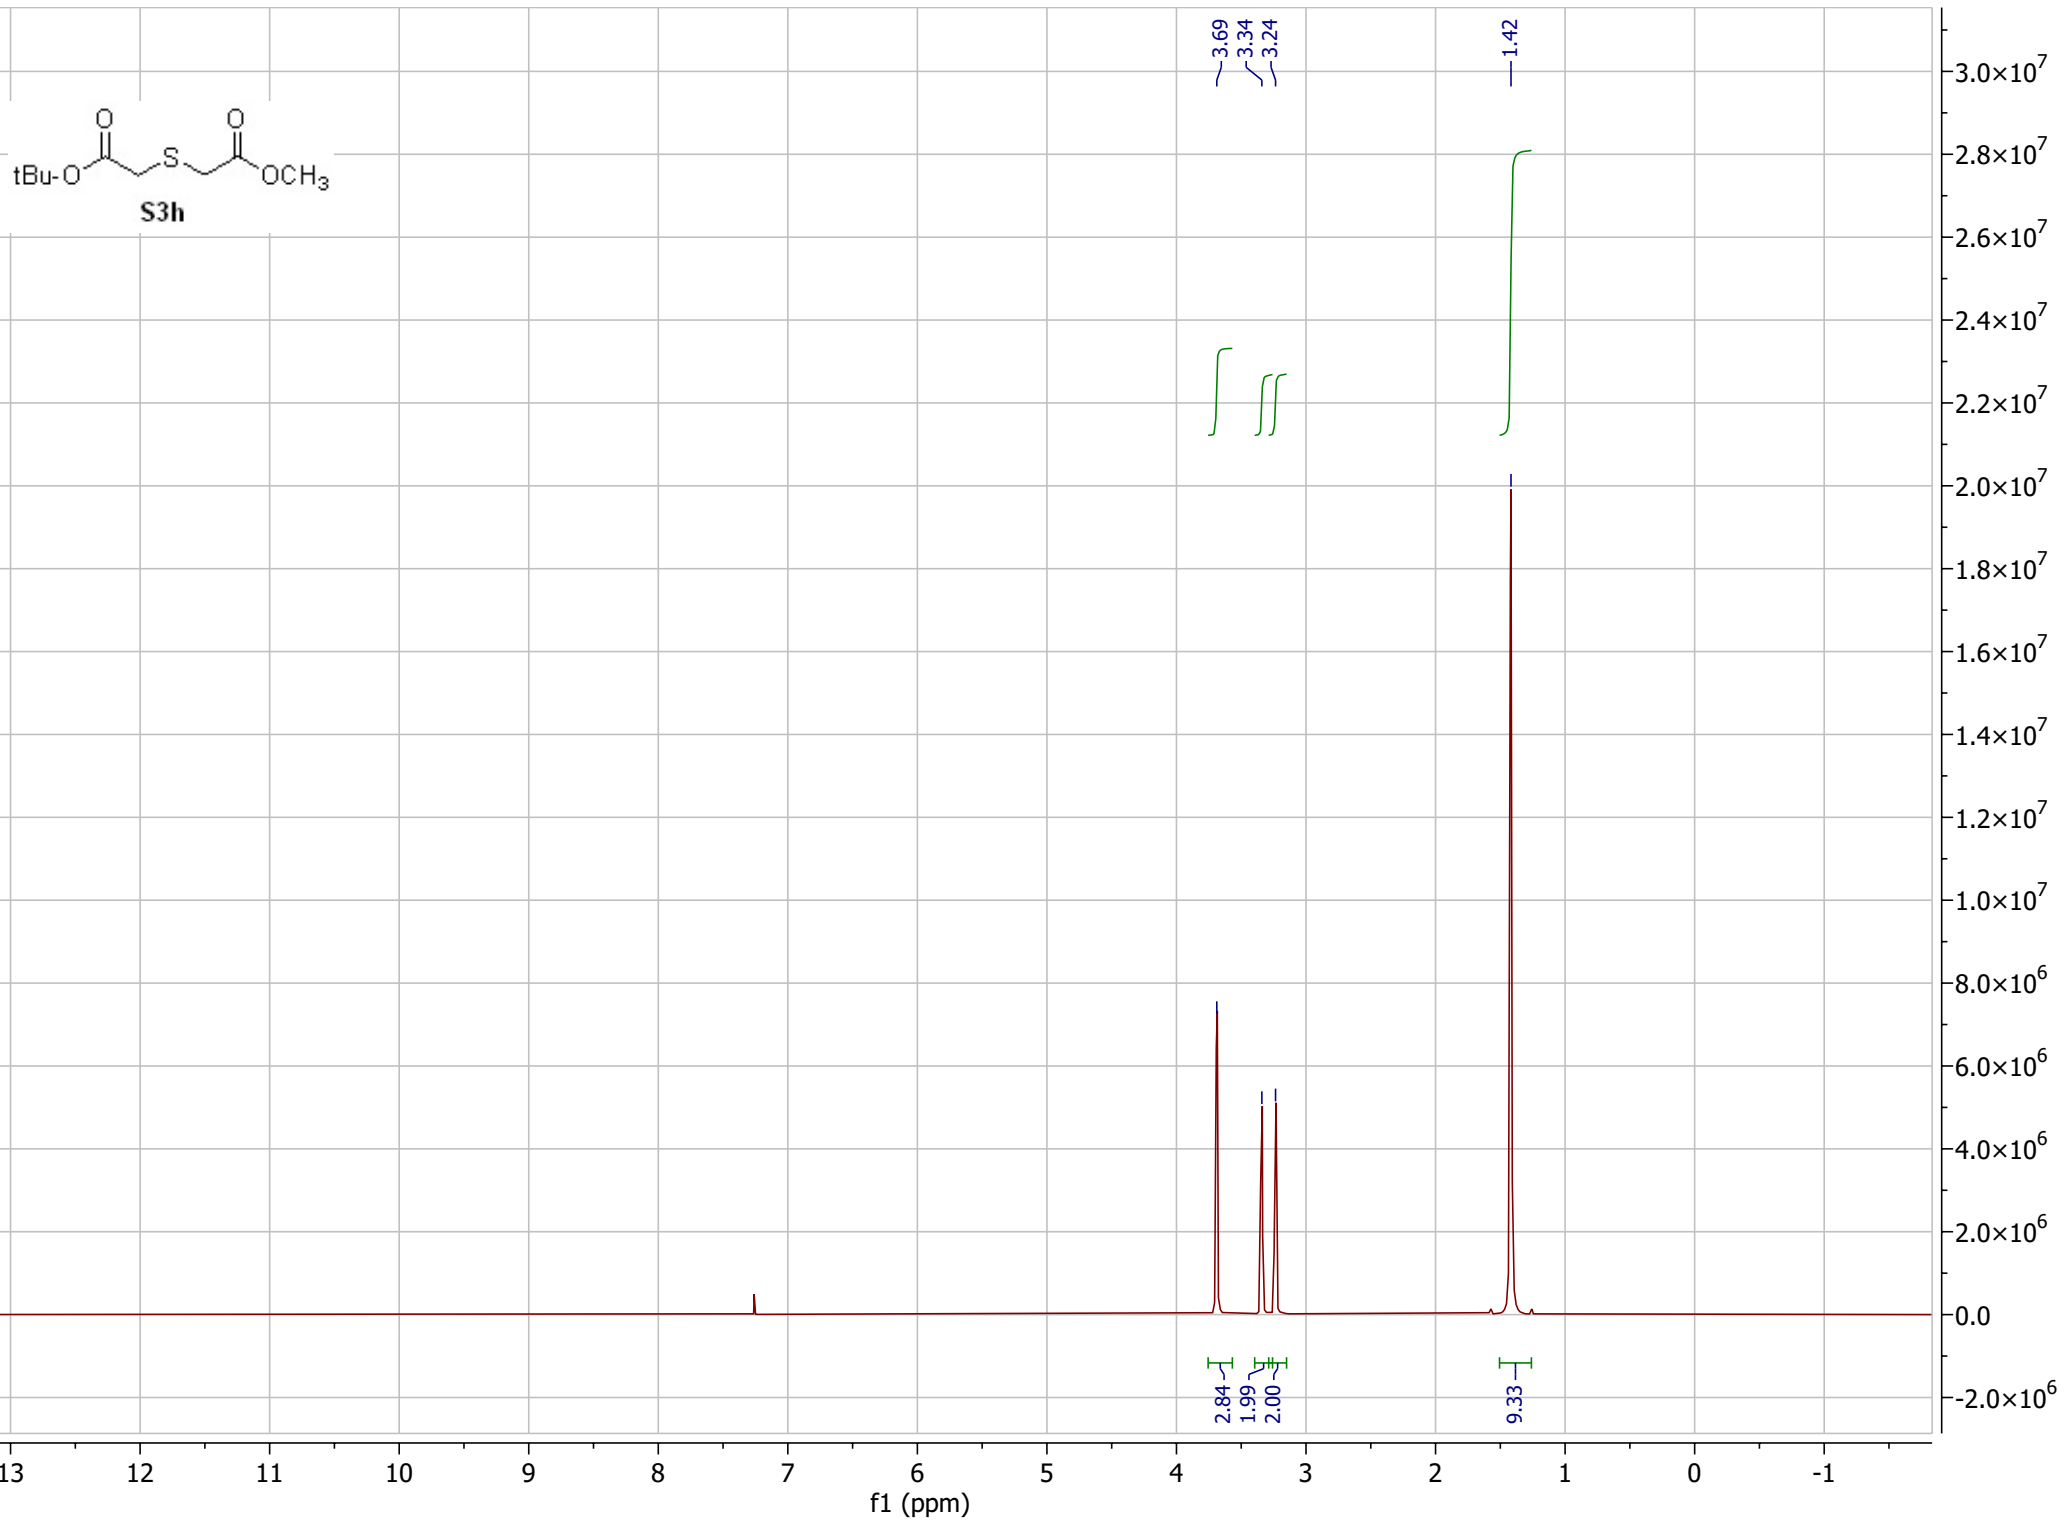

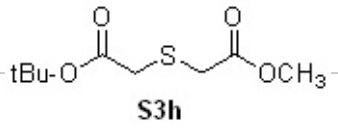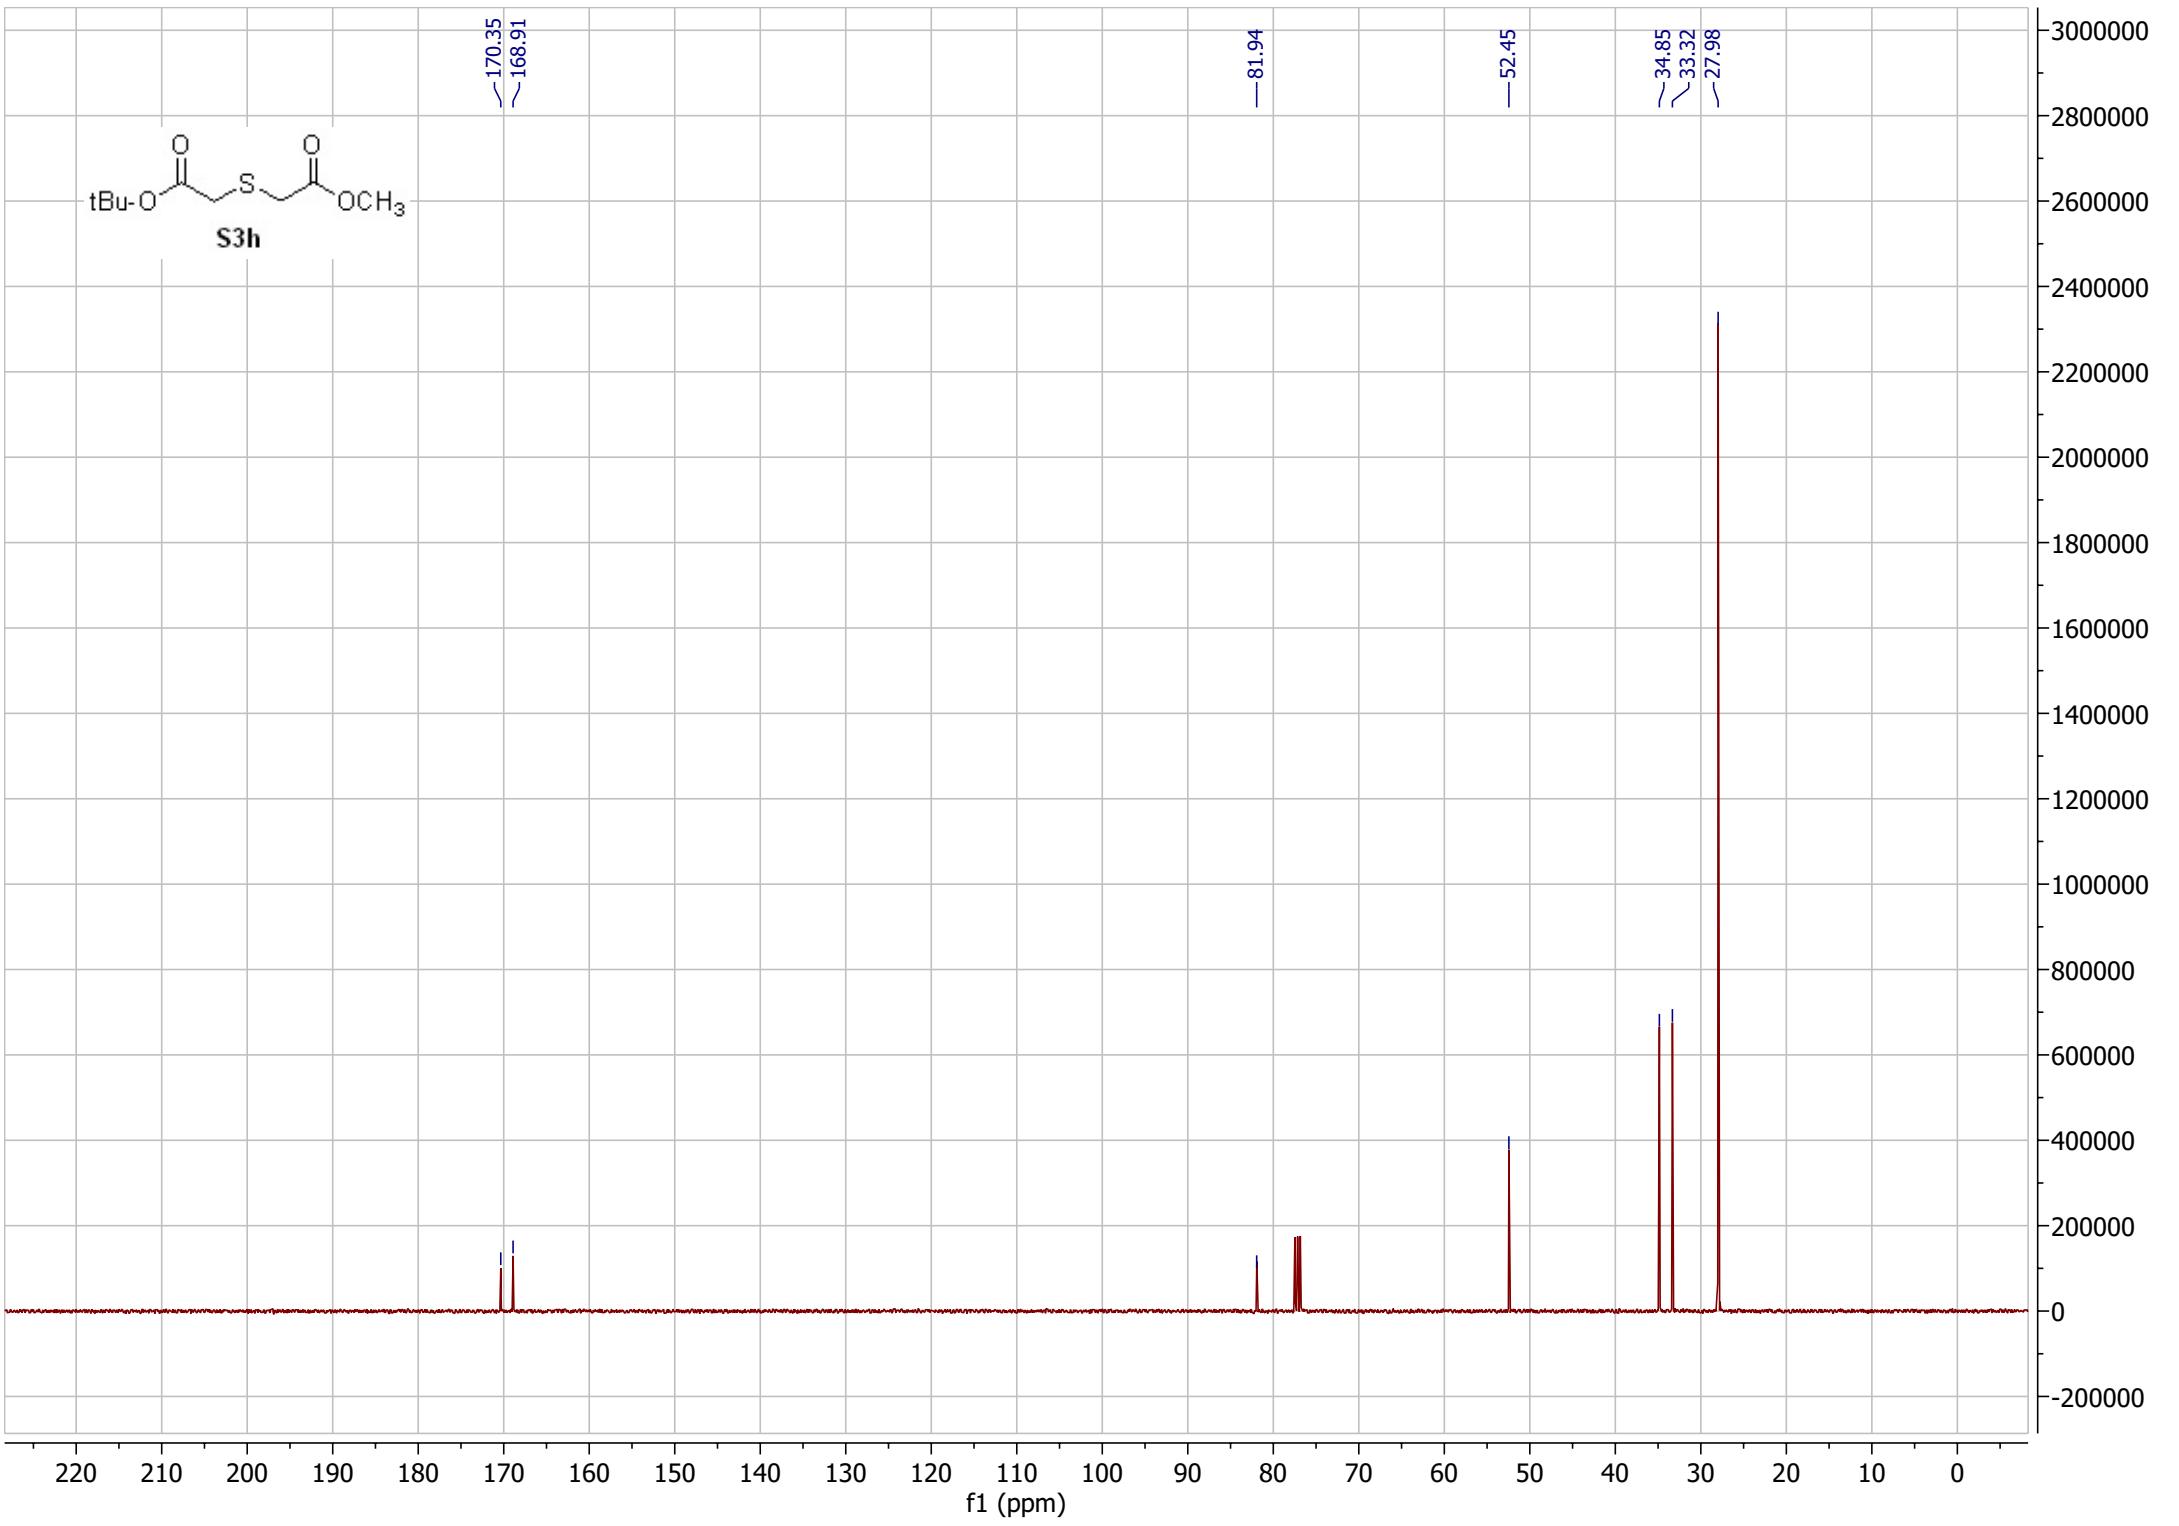

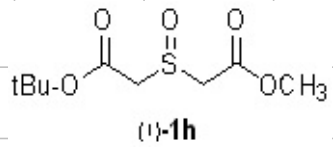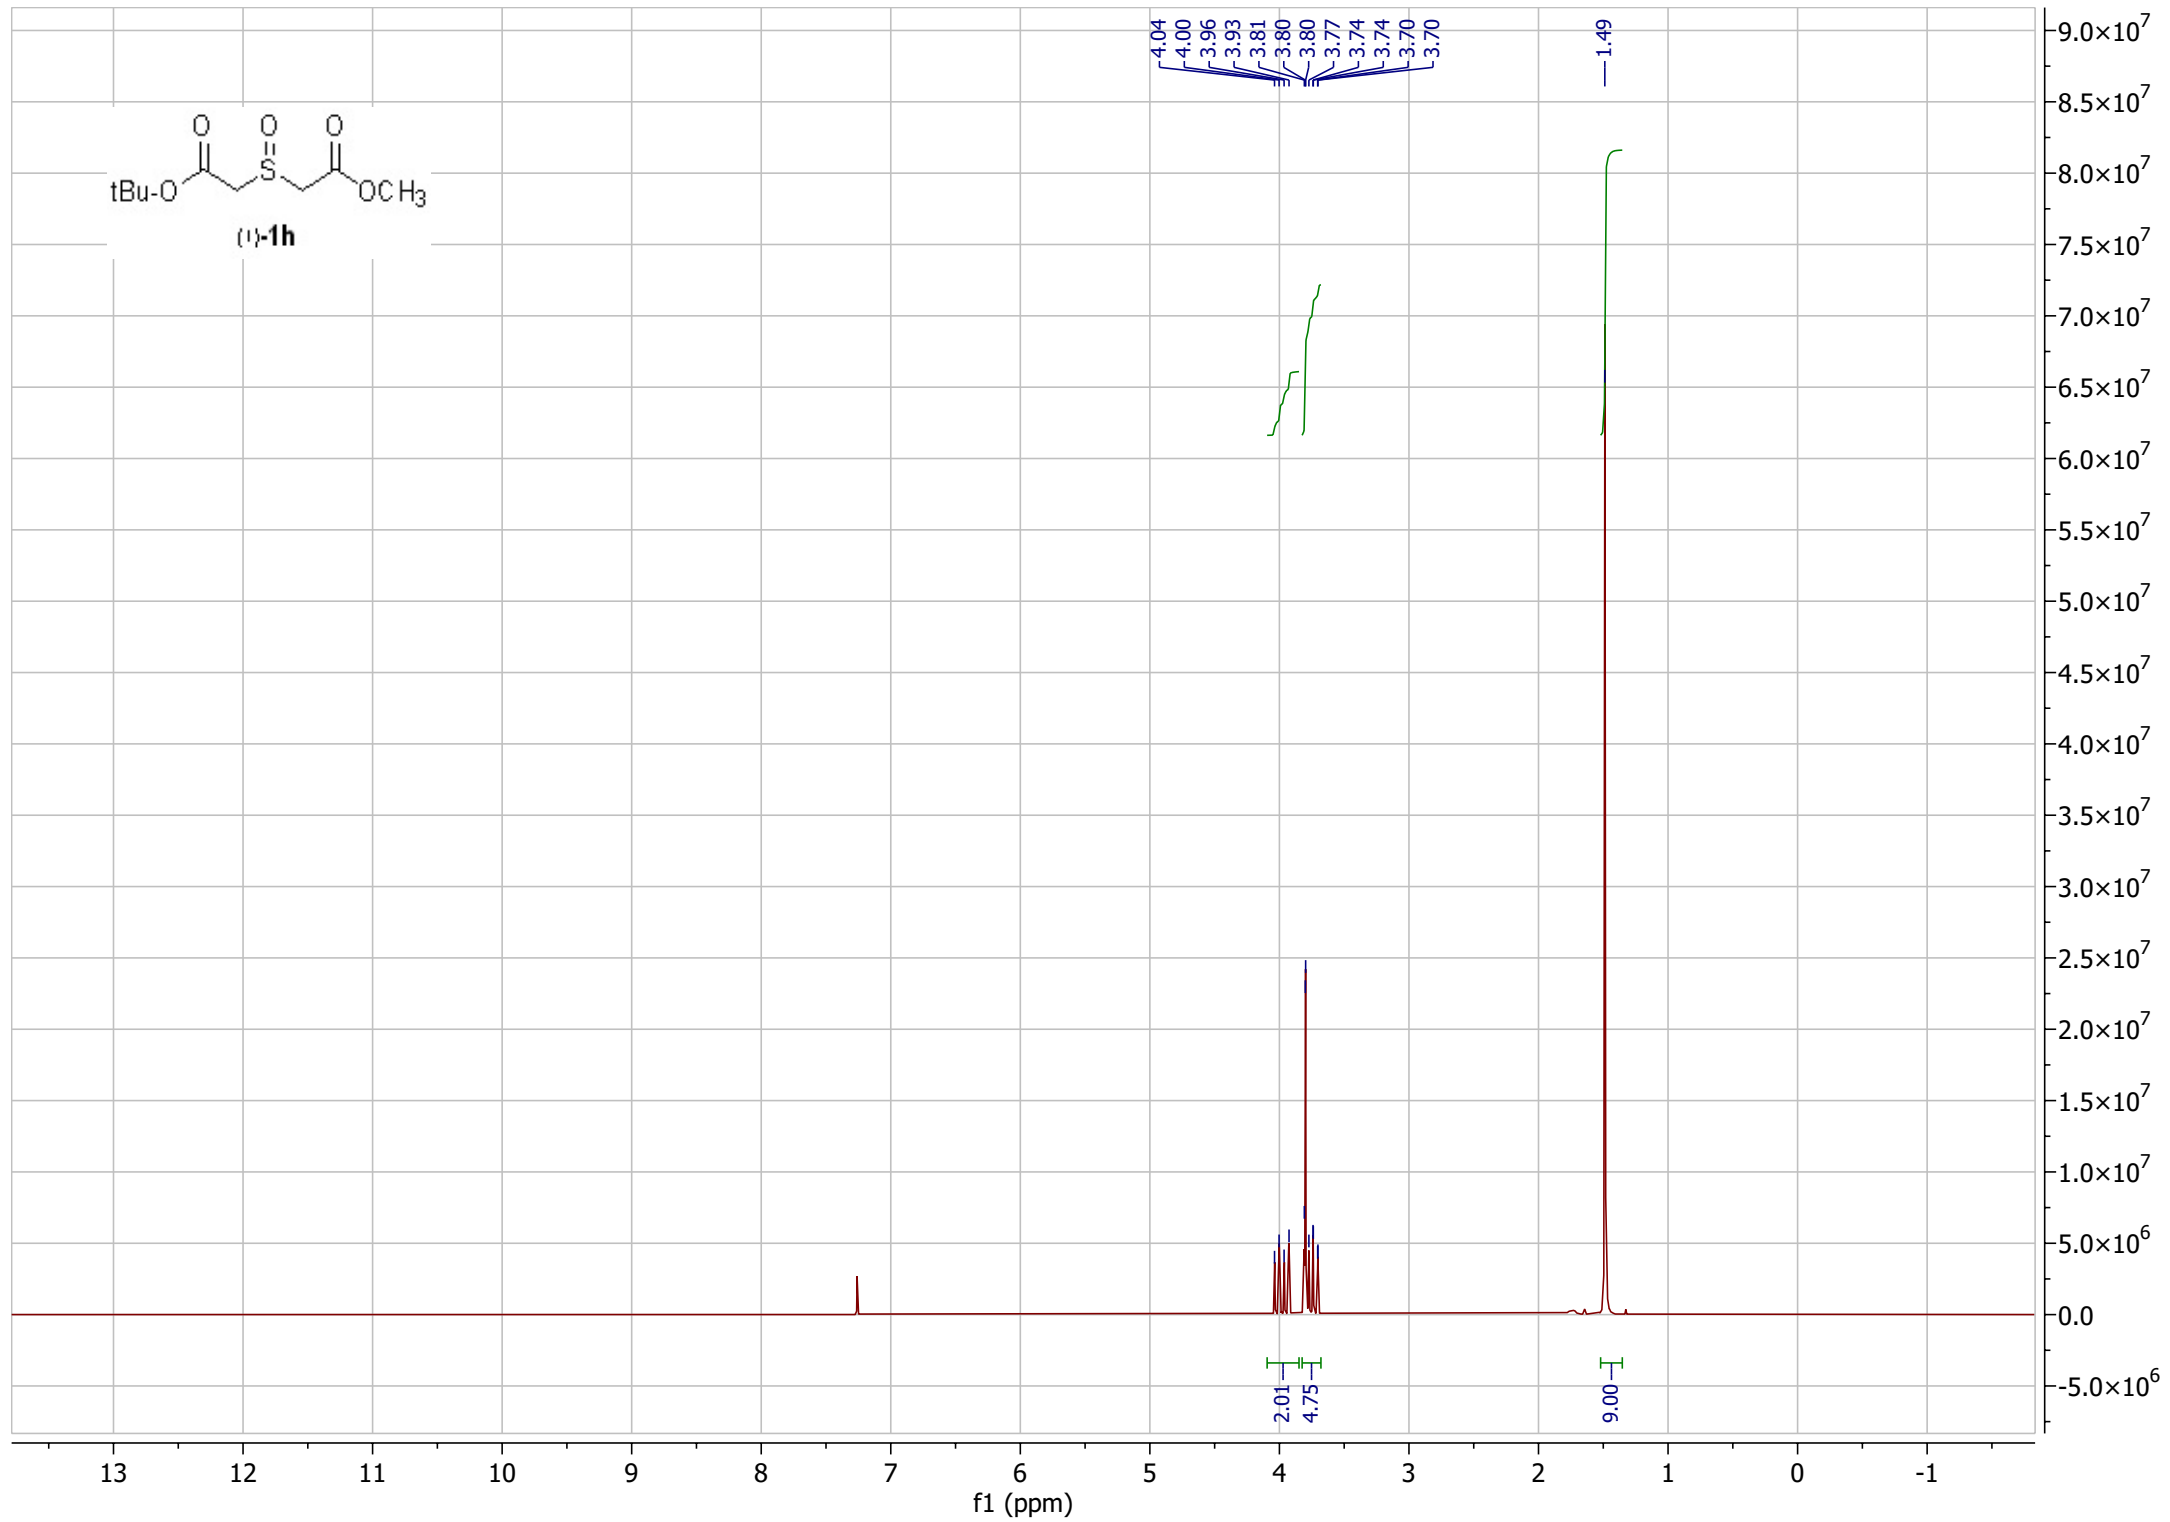

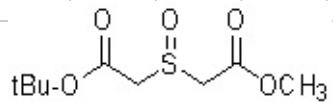

(-)-**1h**

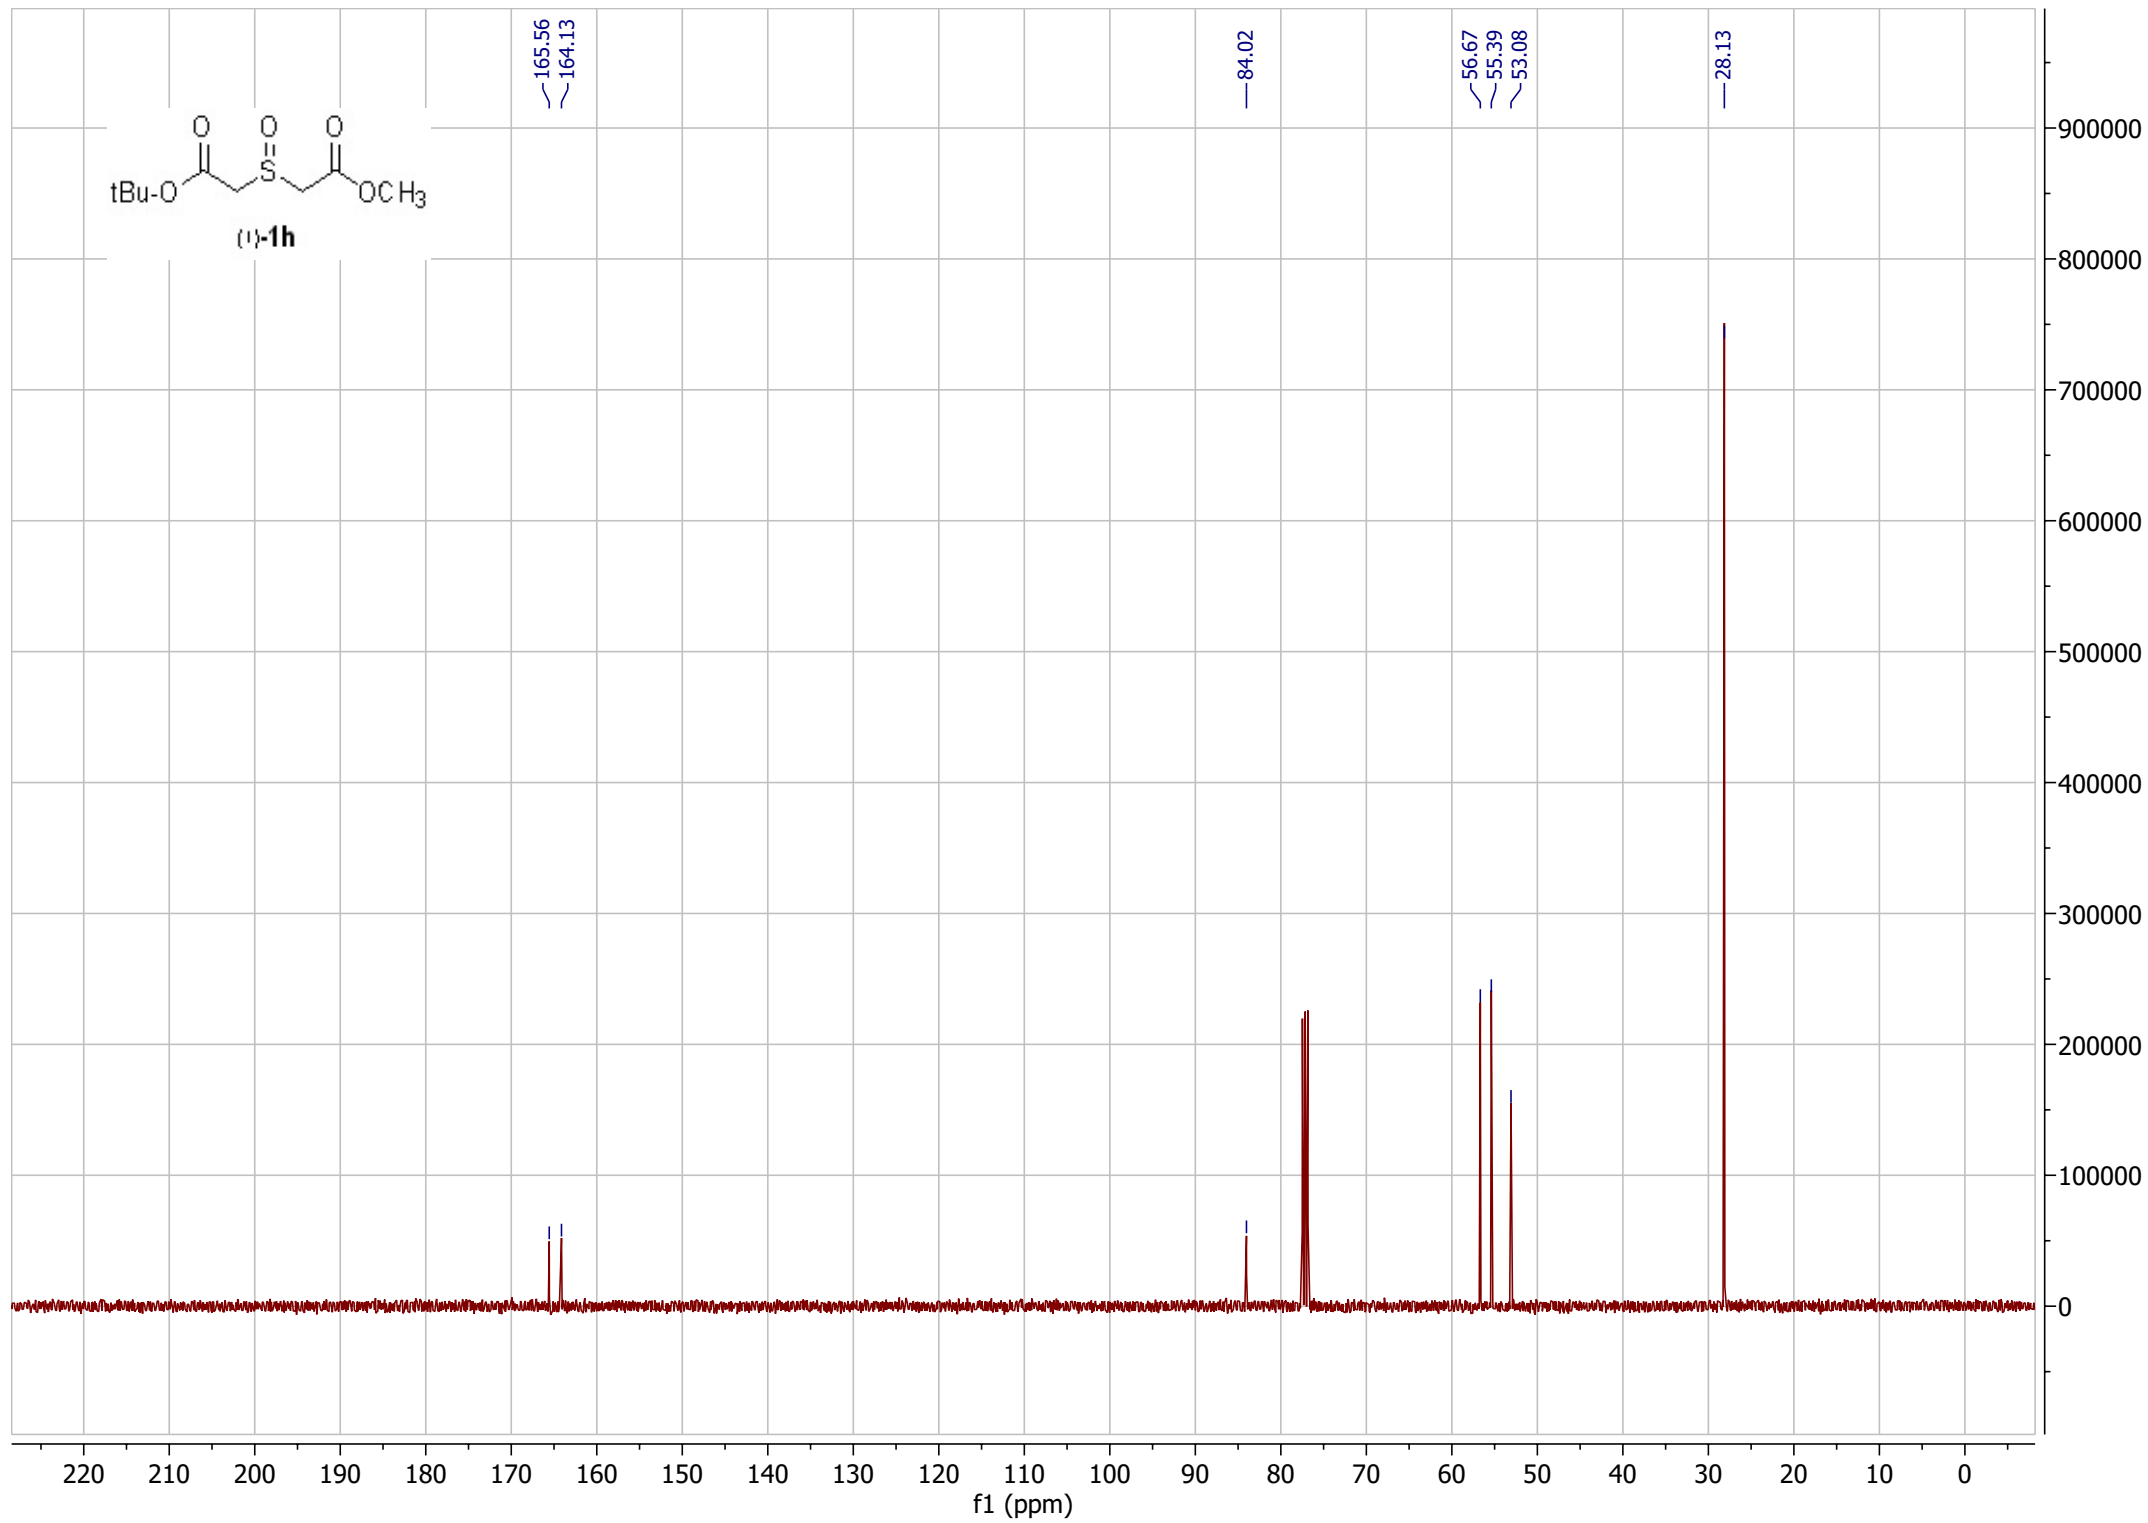

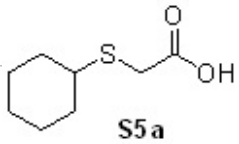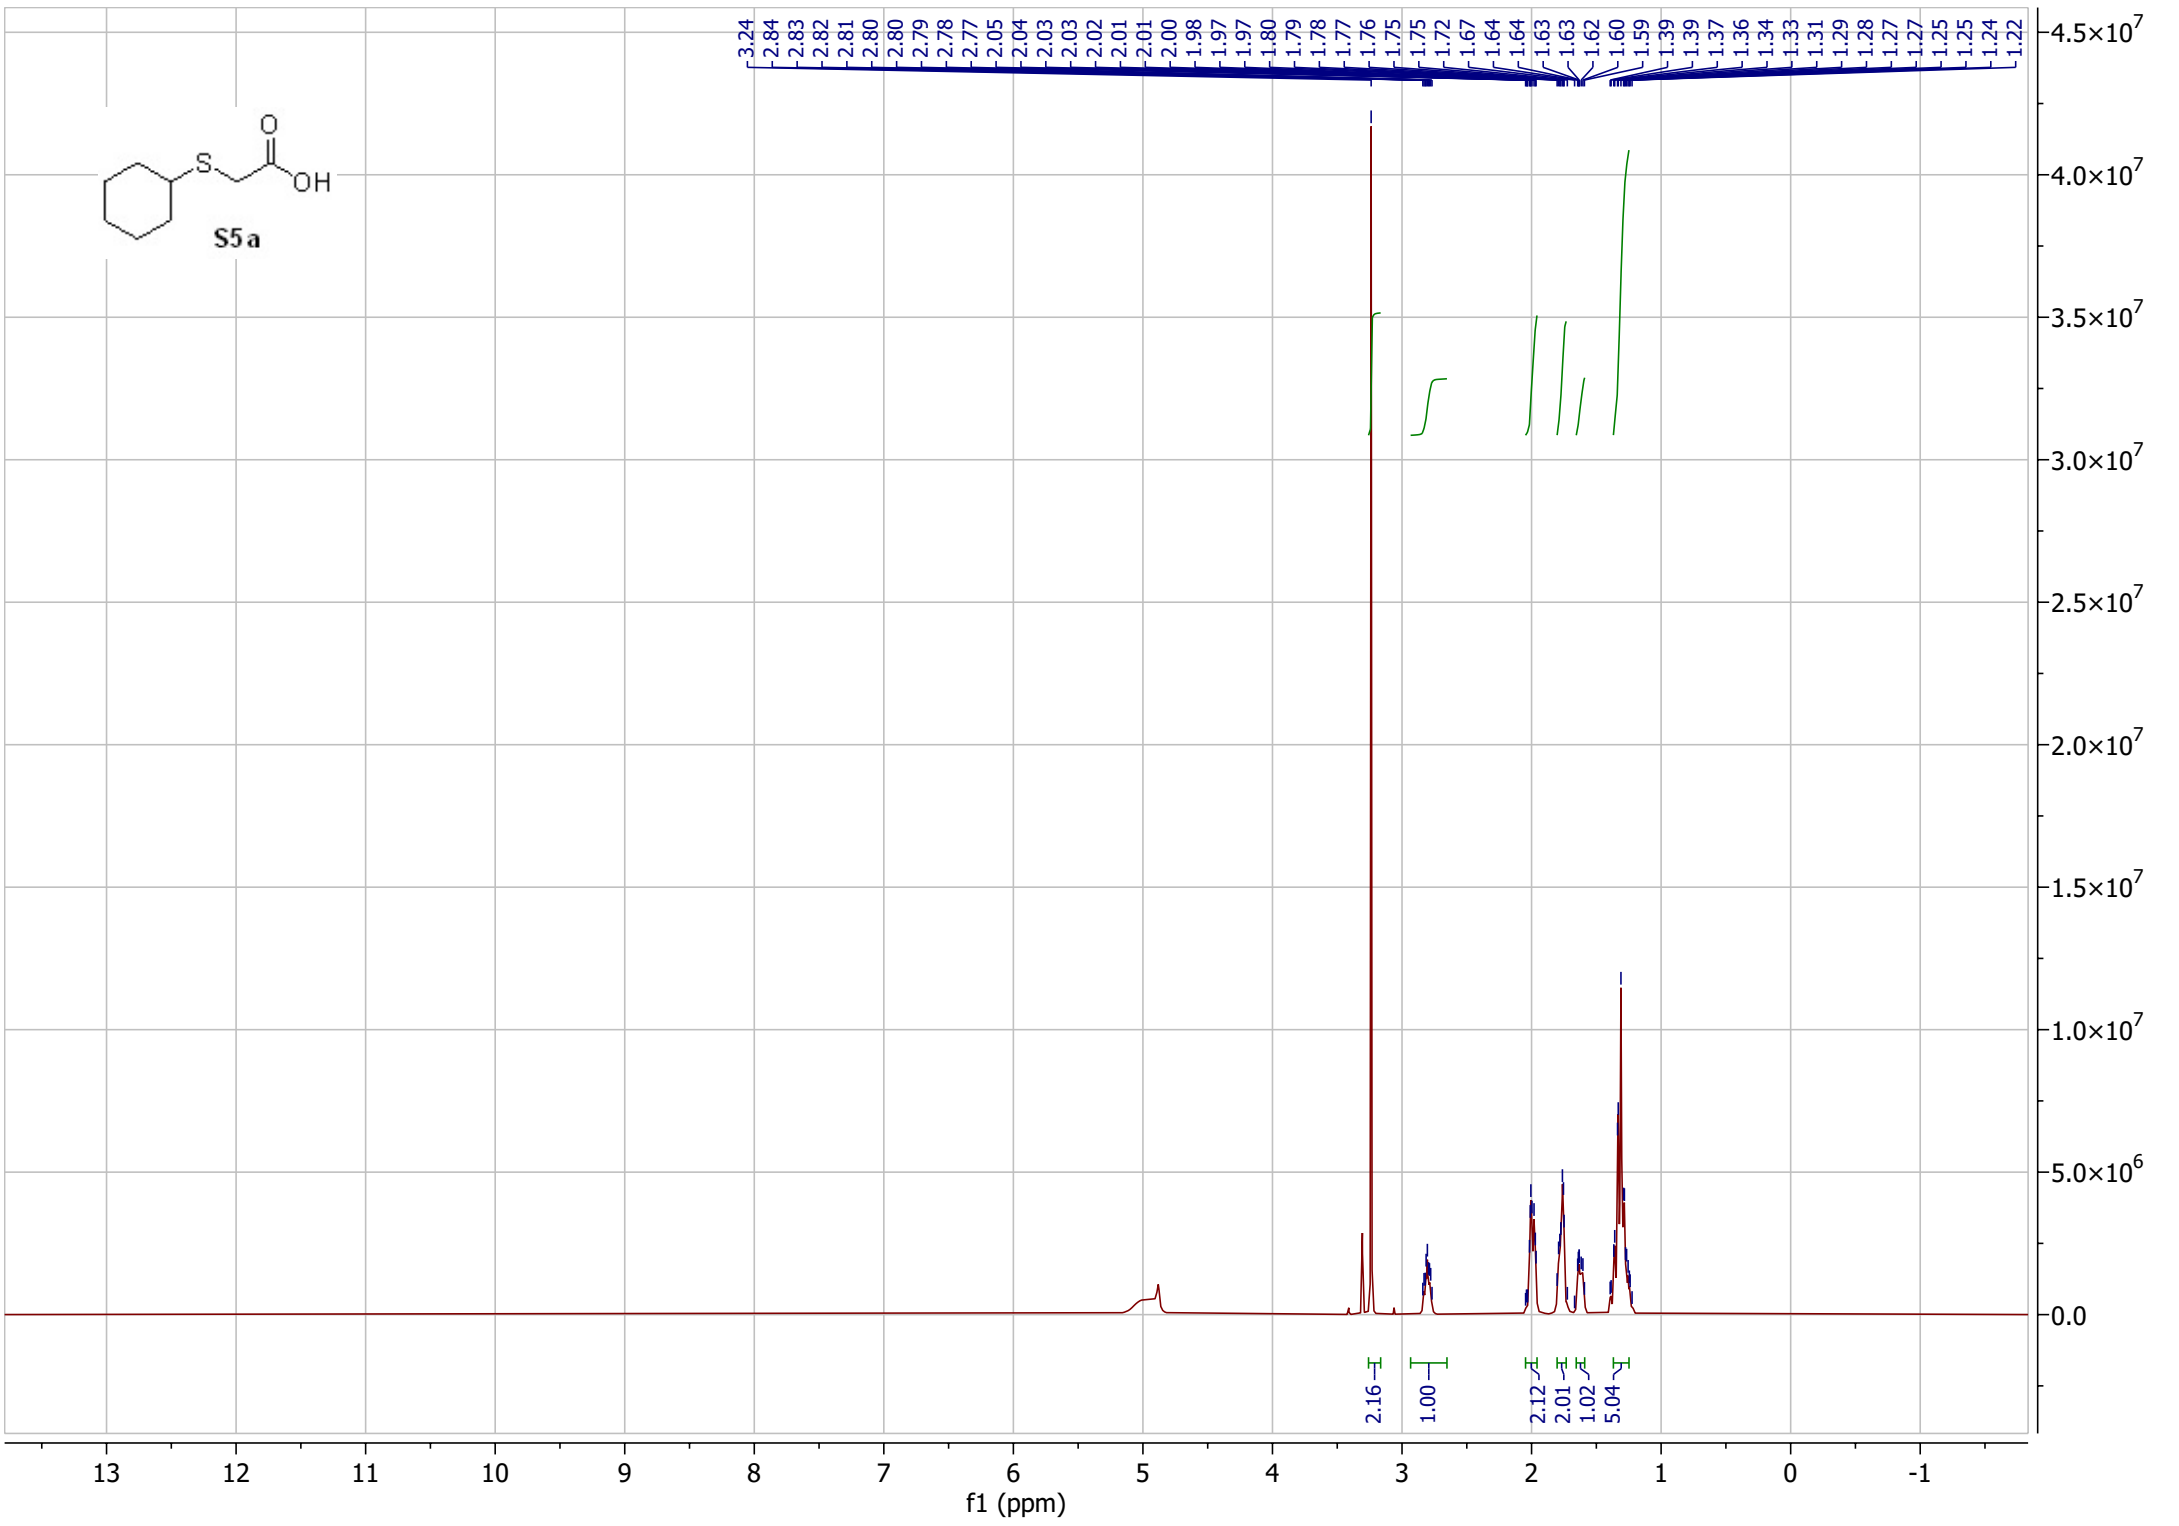

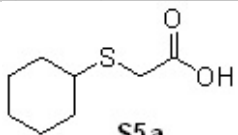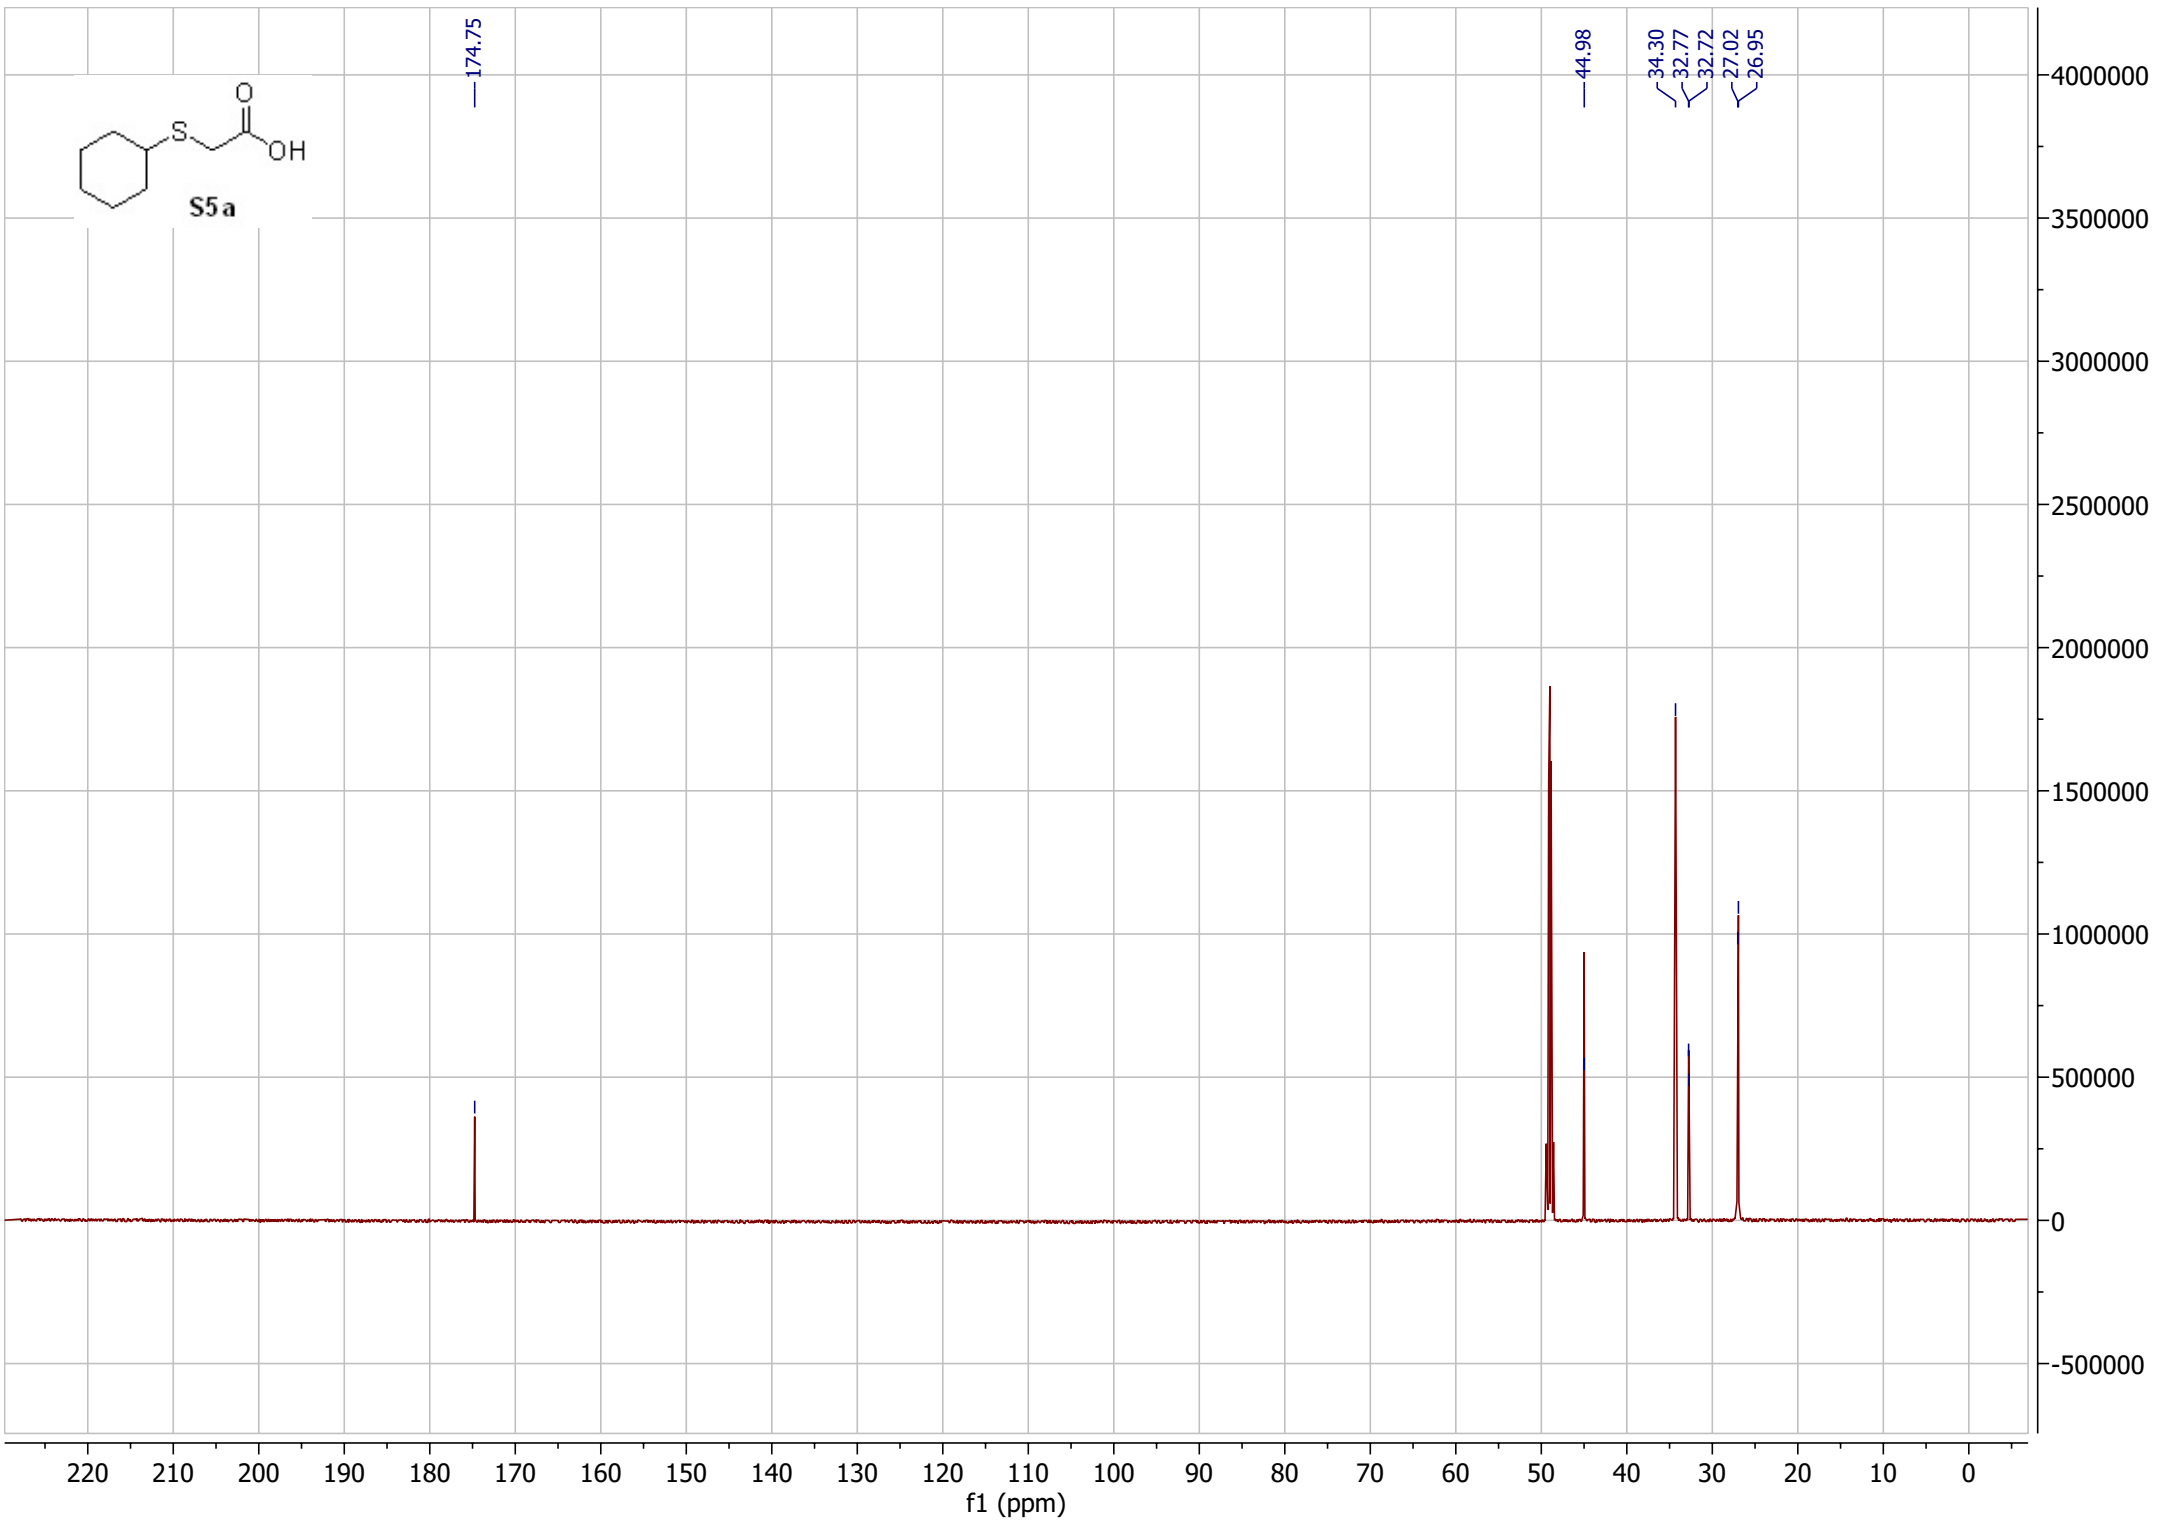

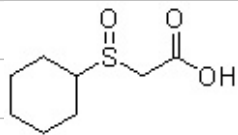

(+)-2a

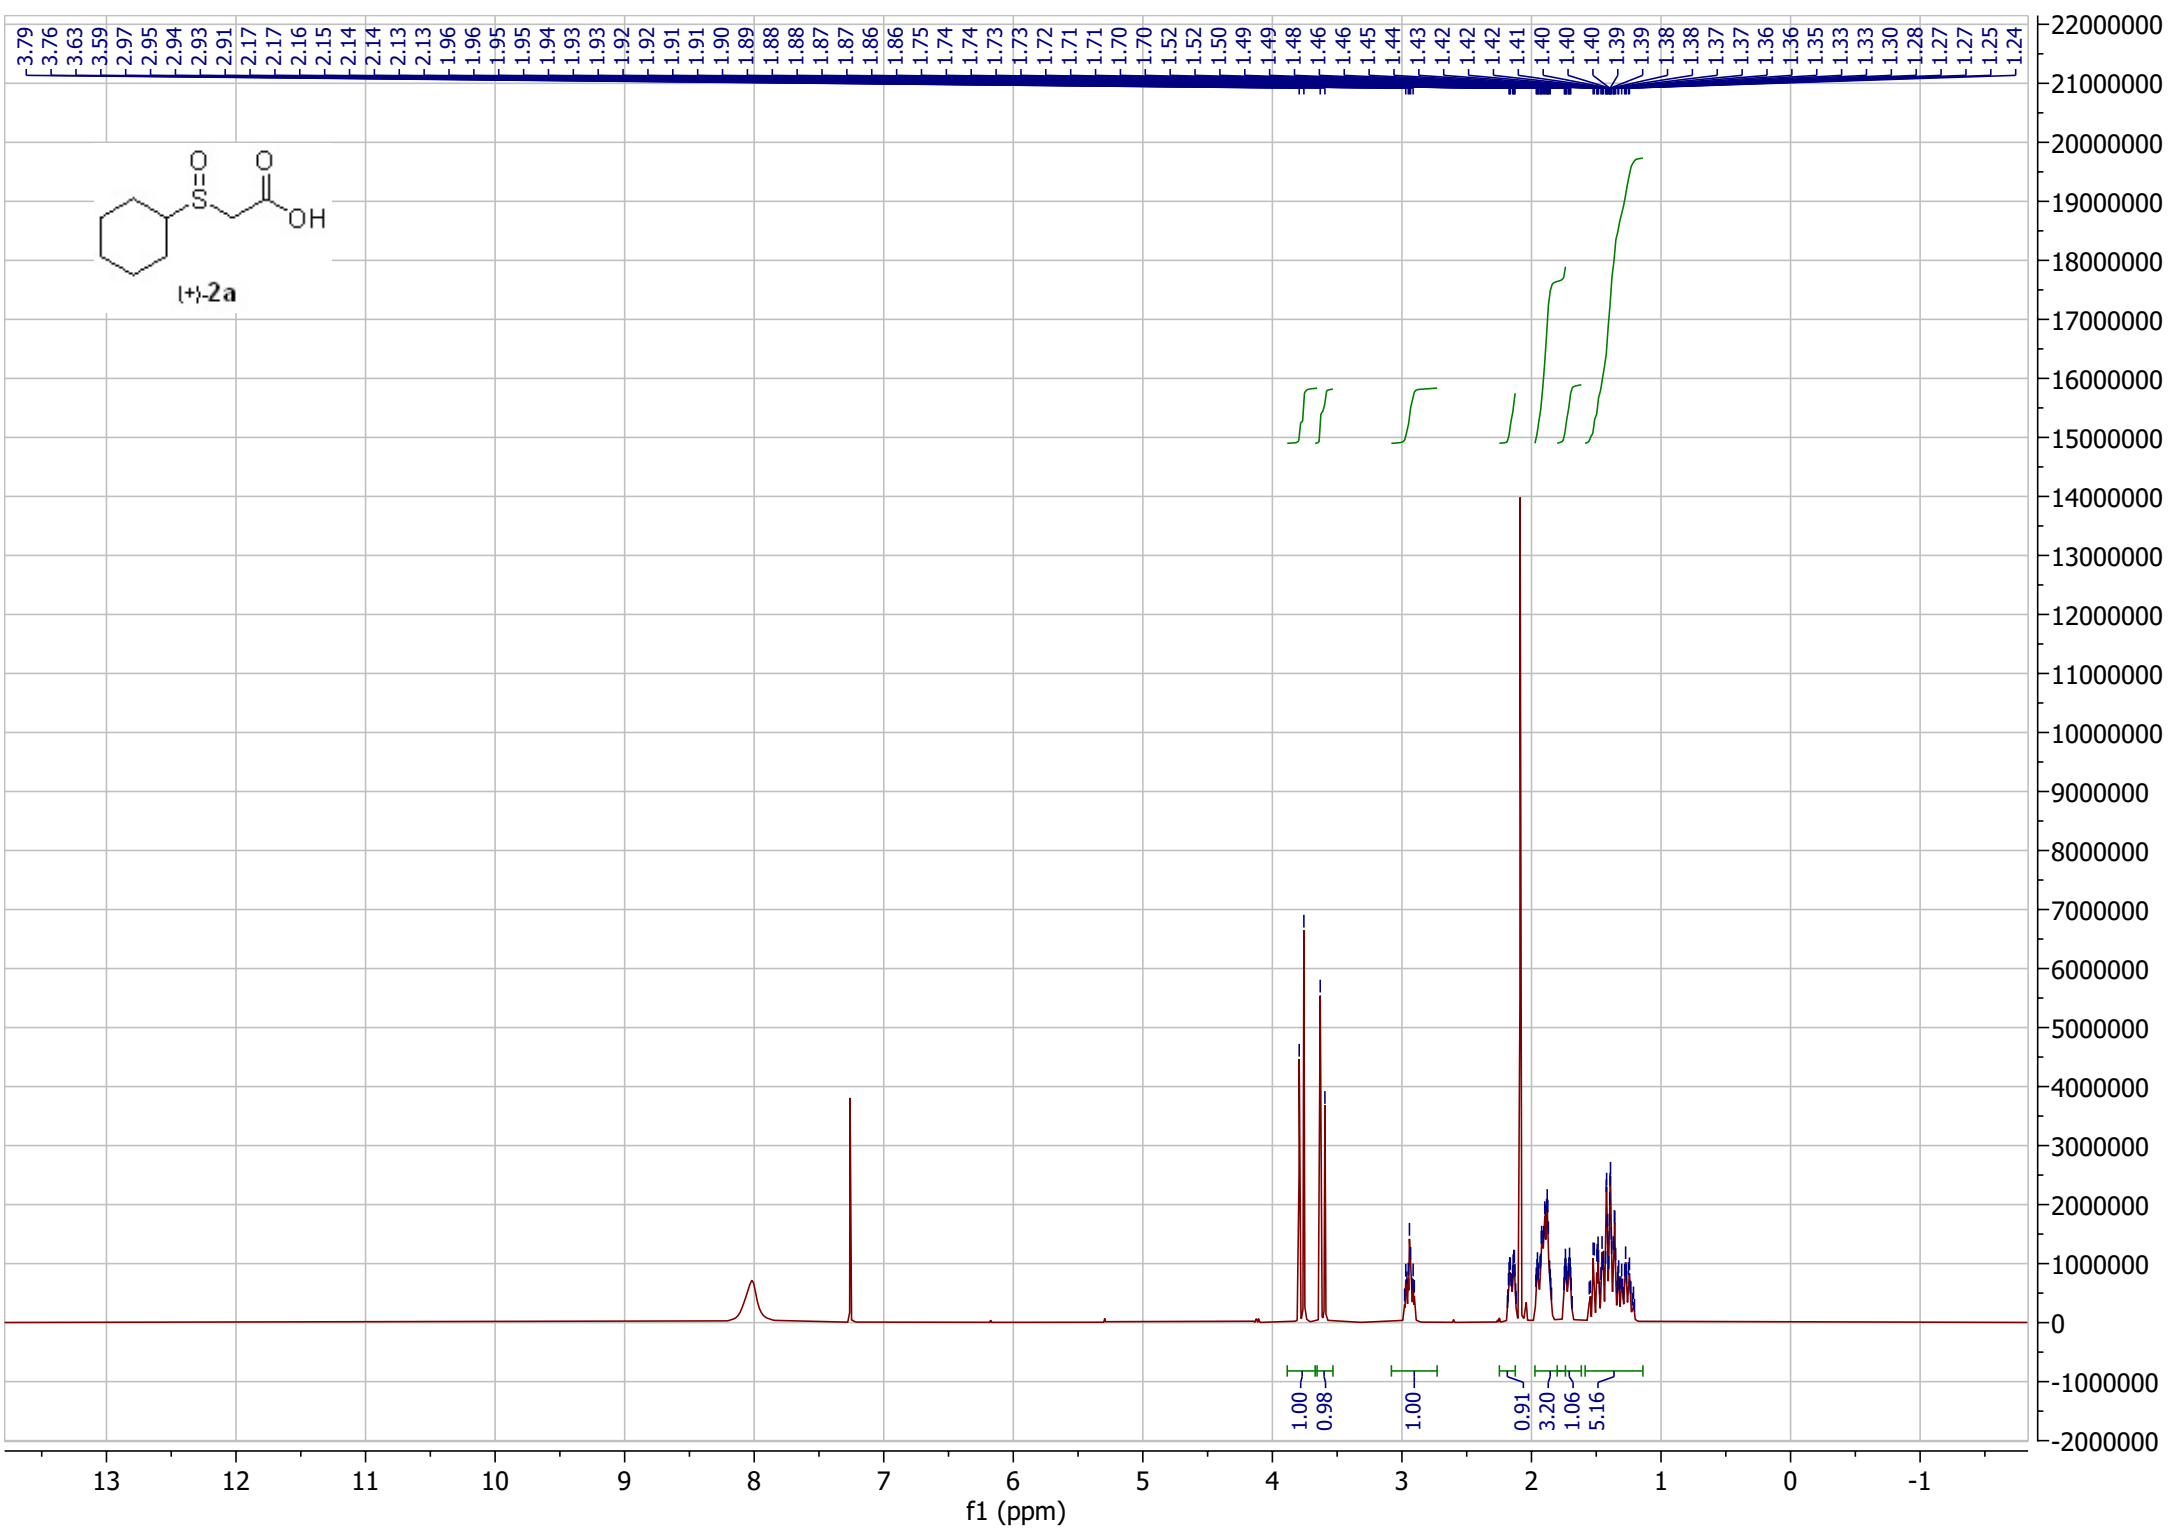

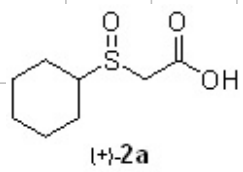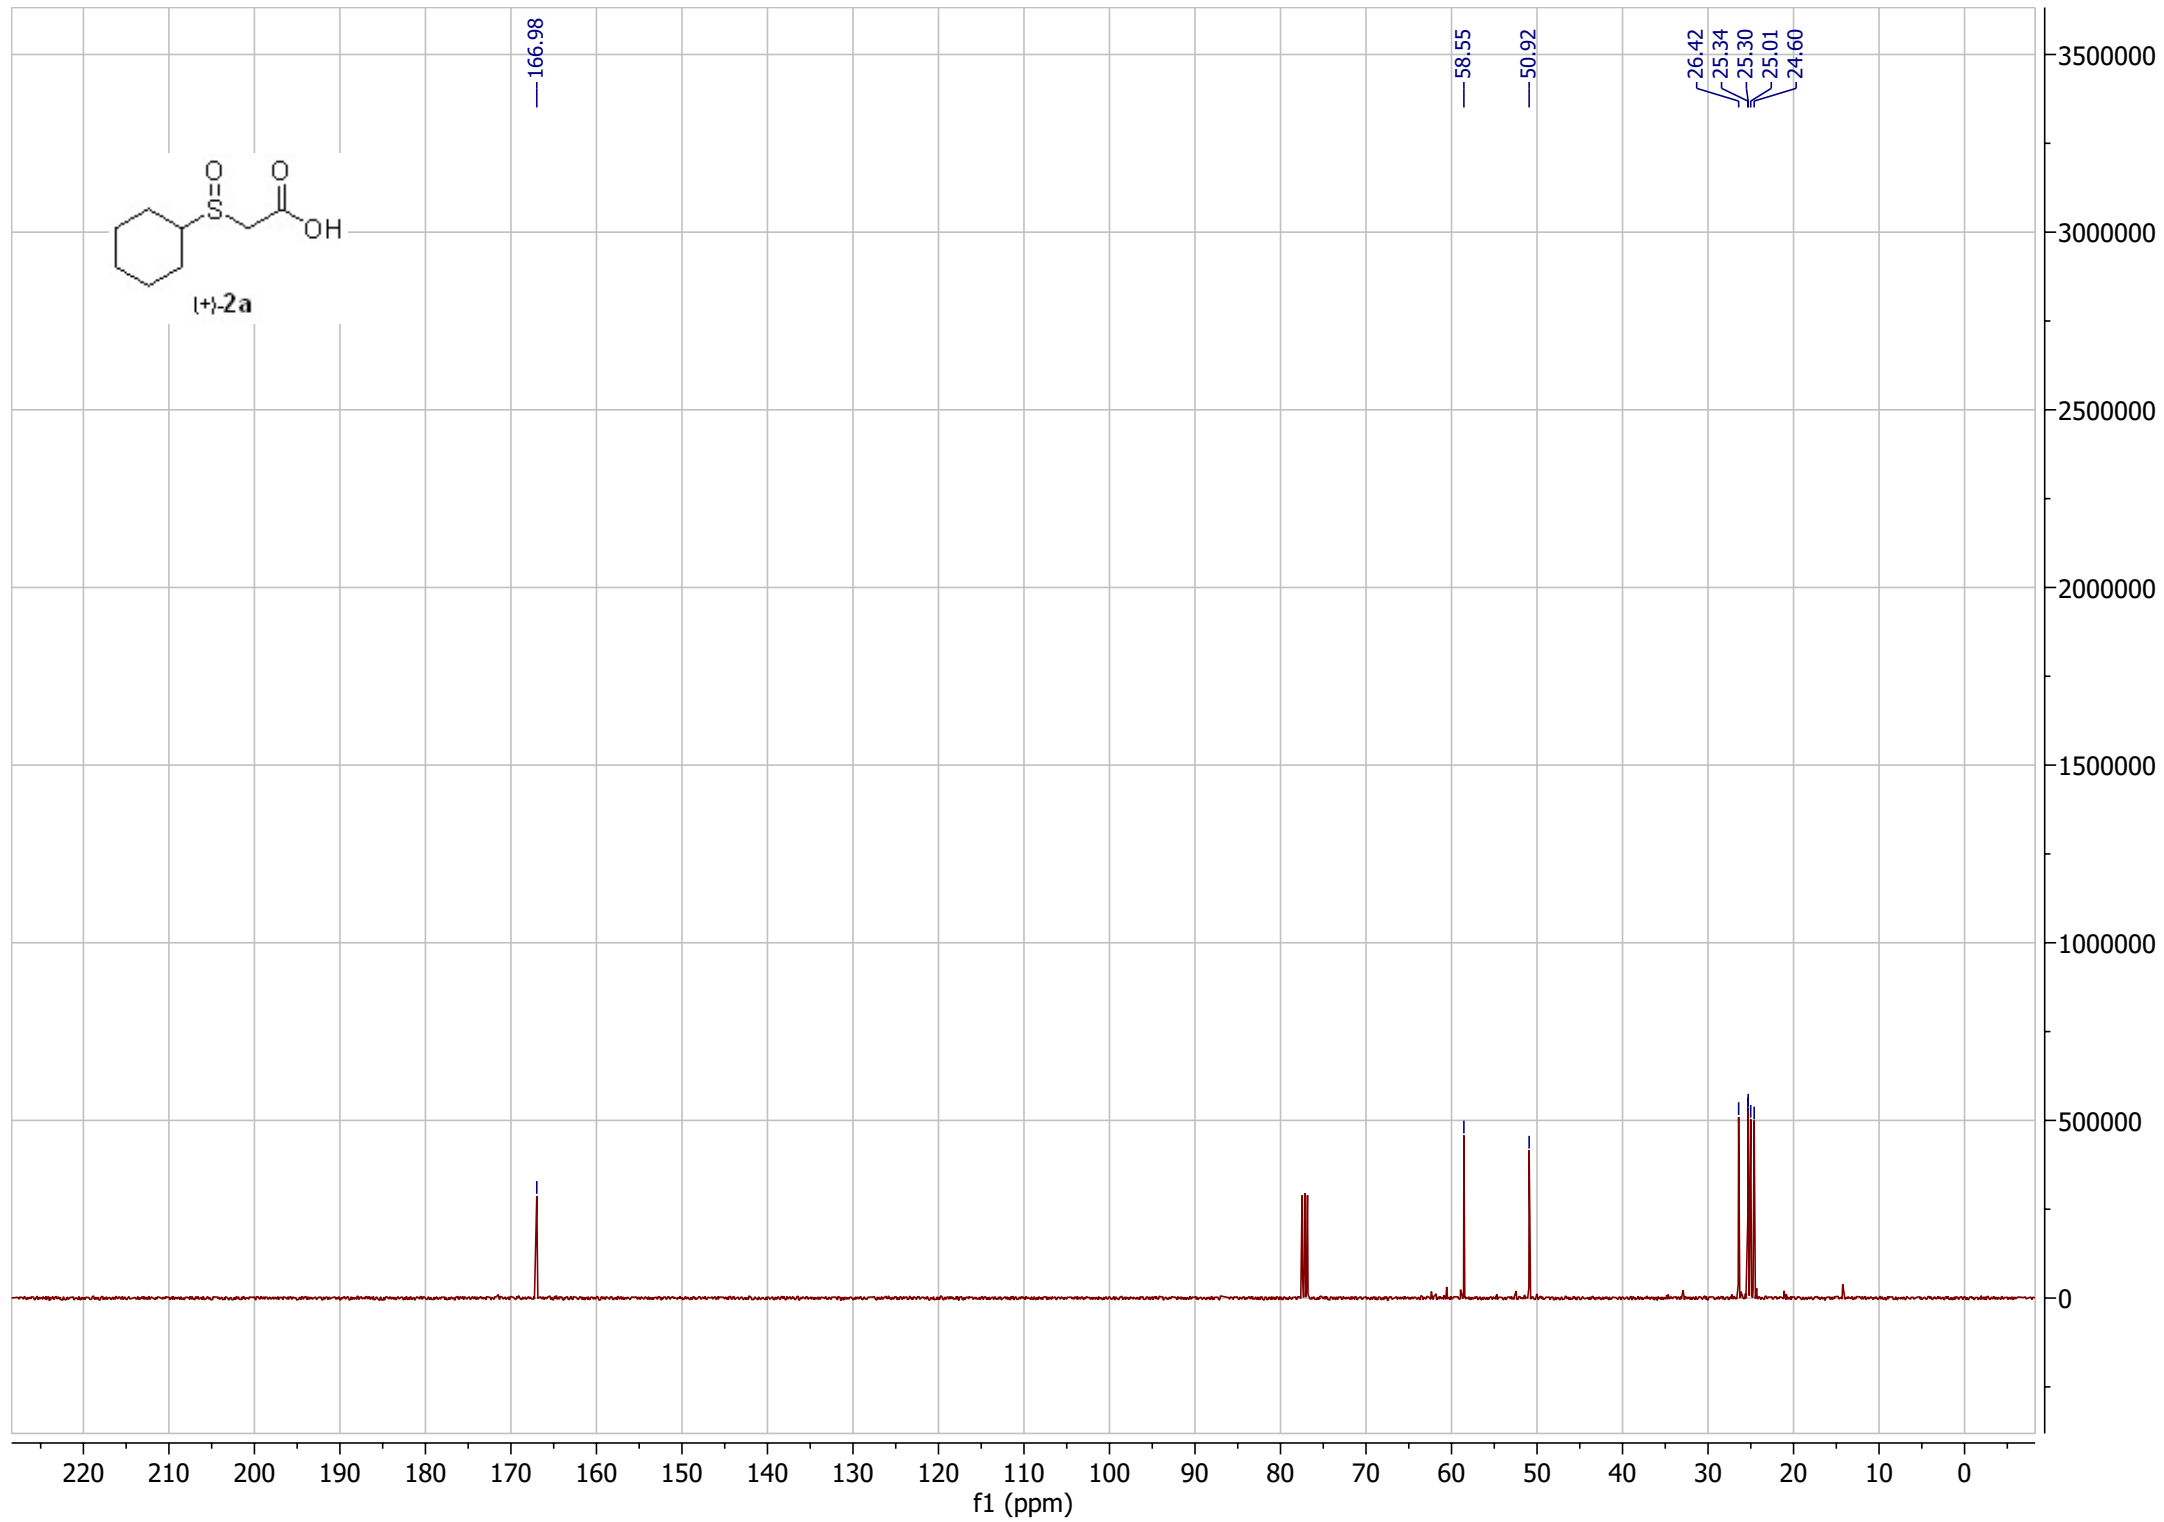



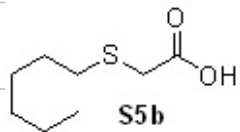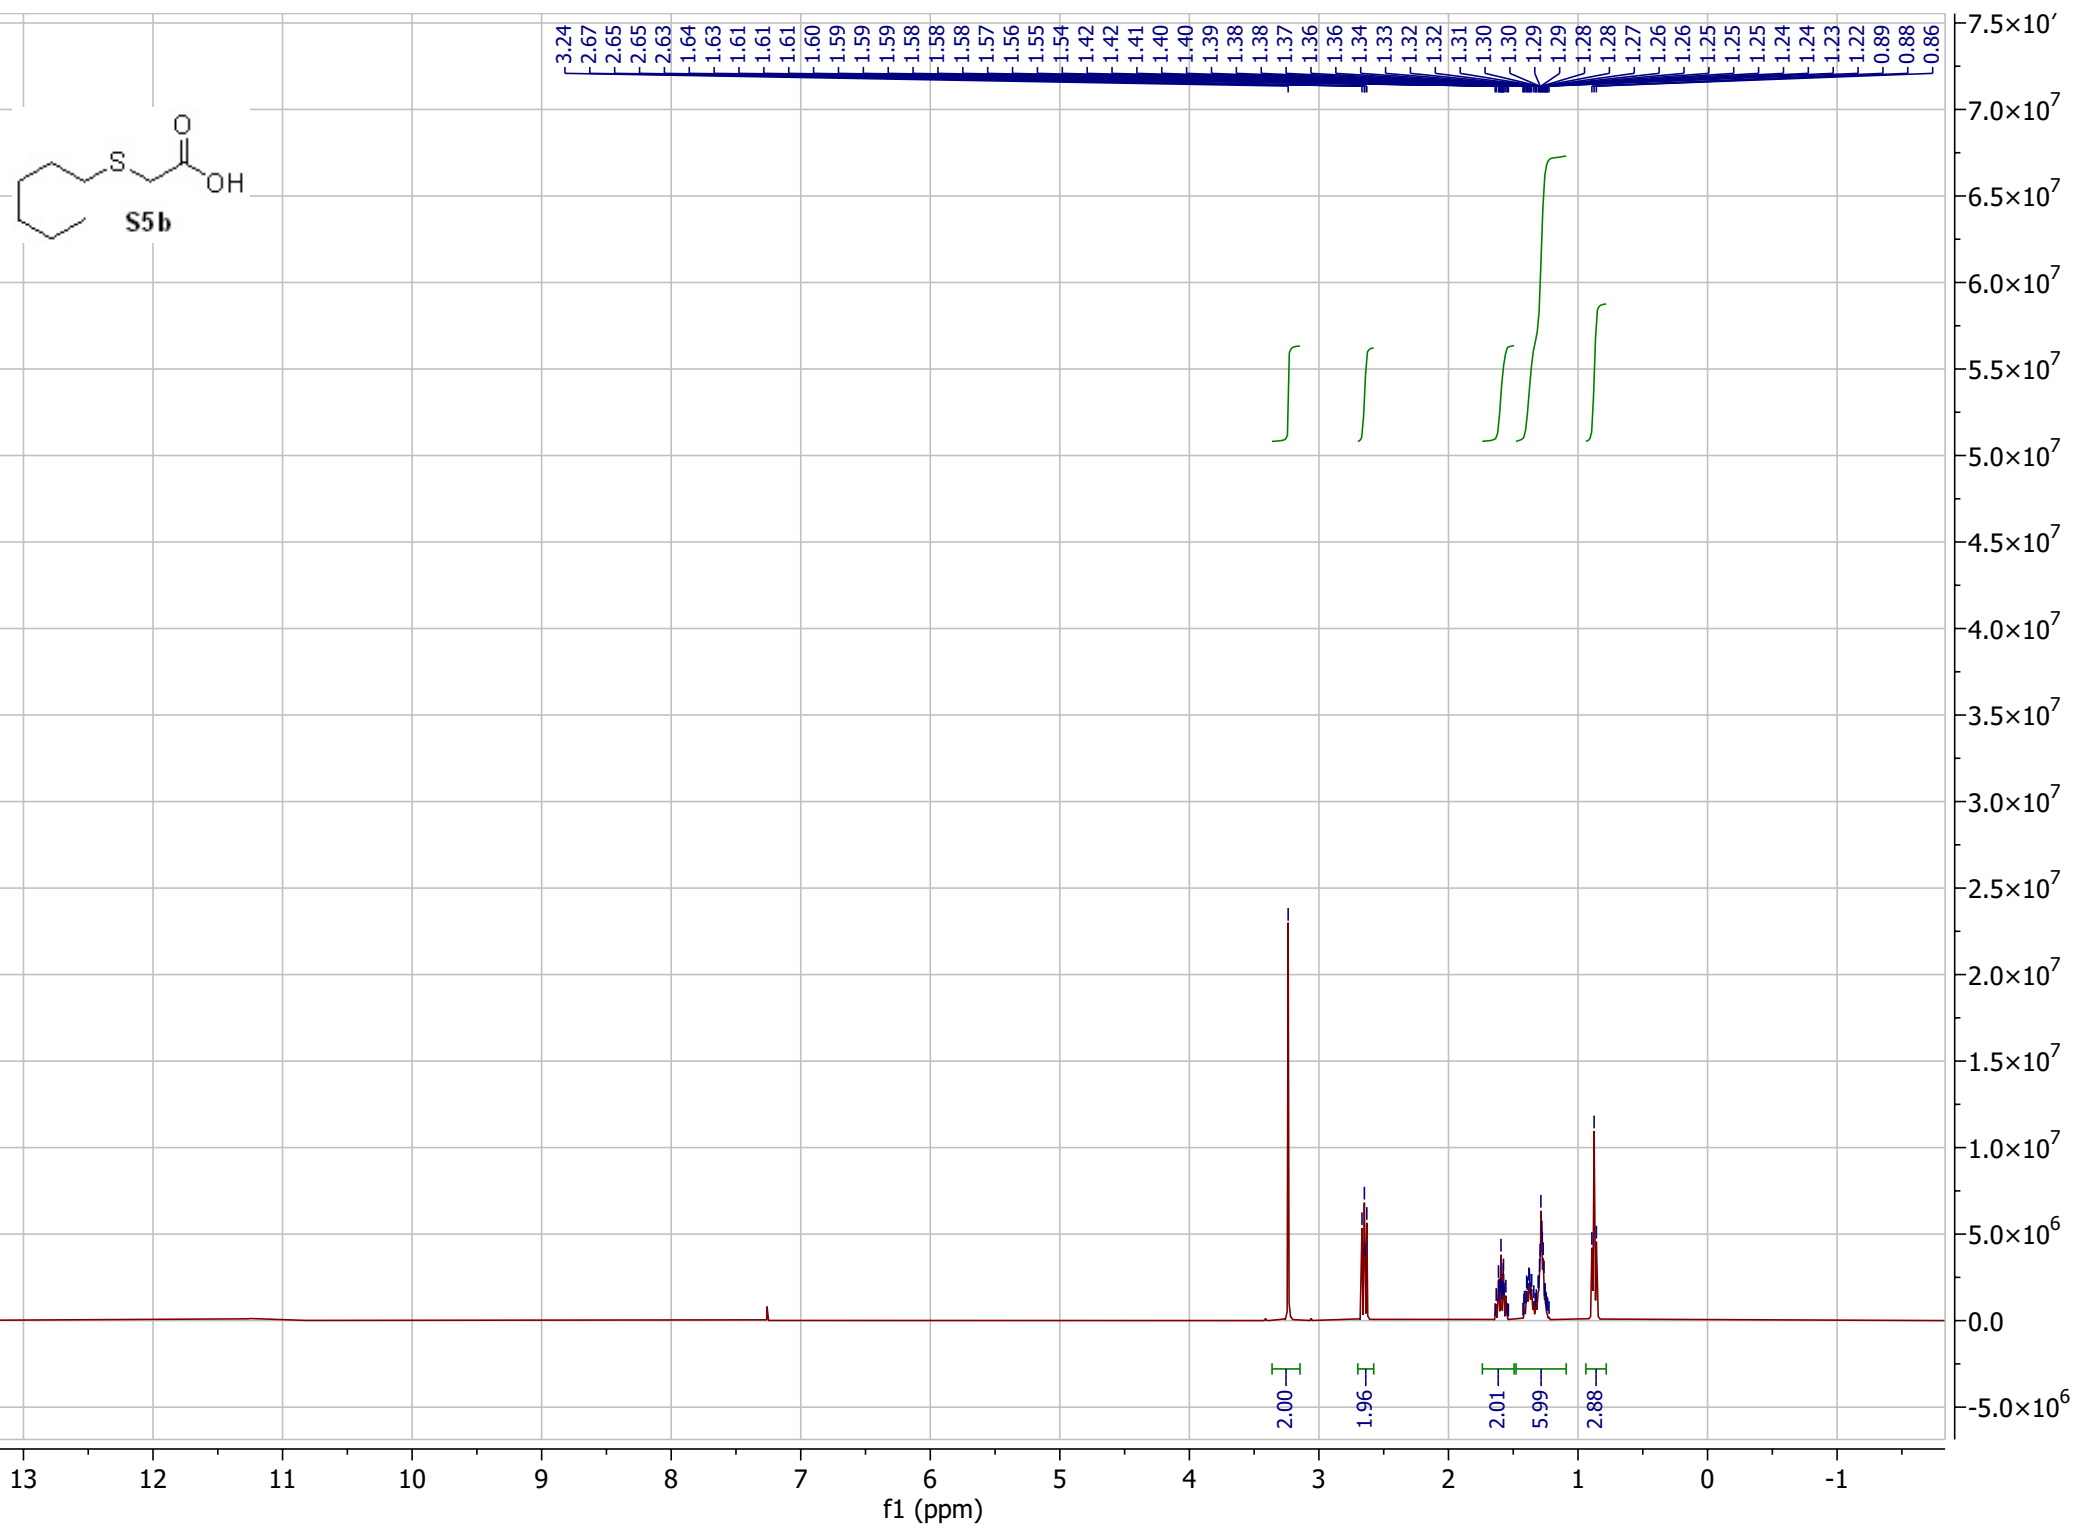

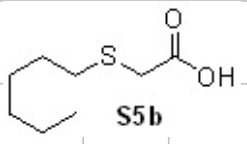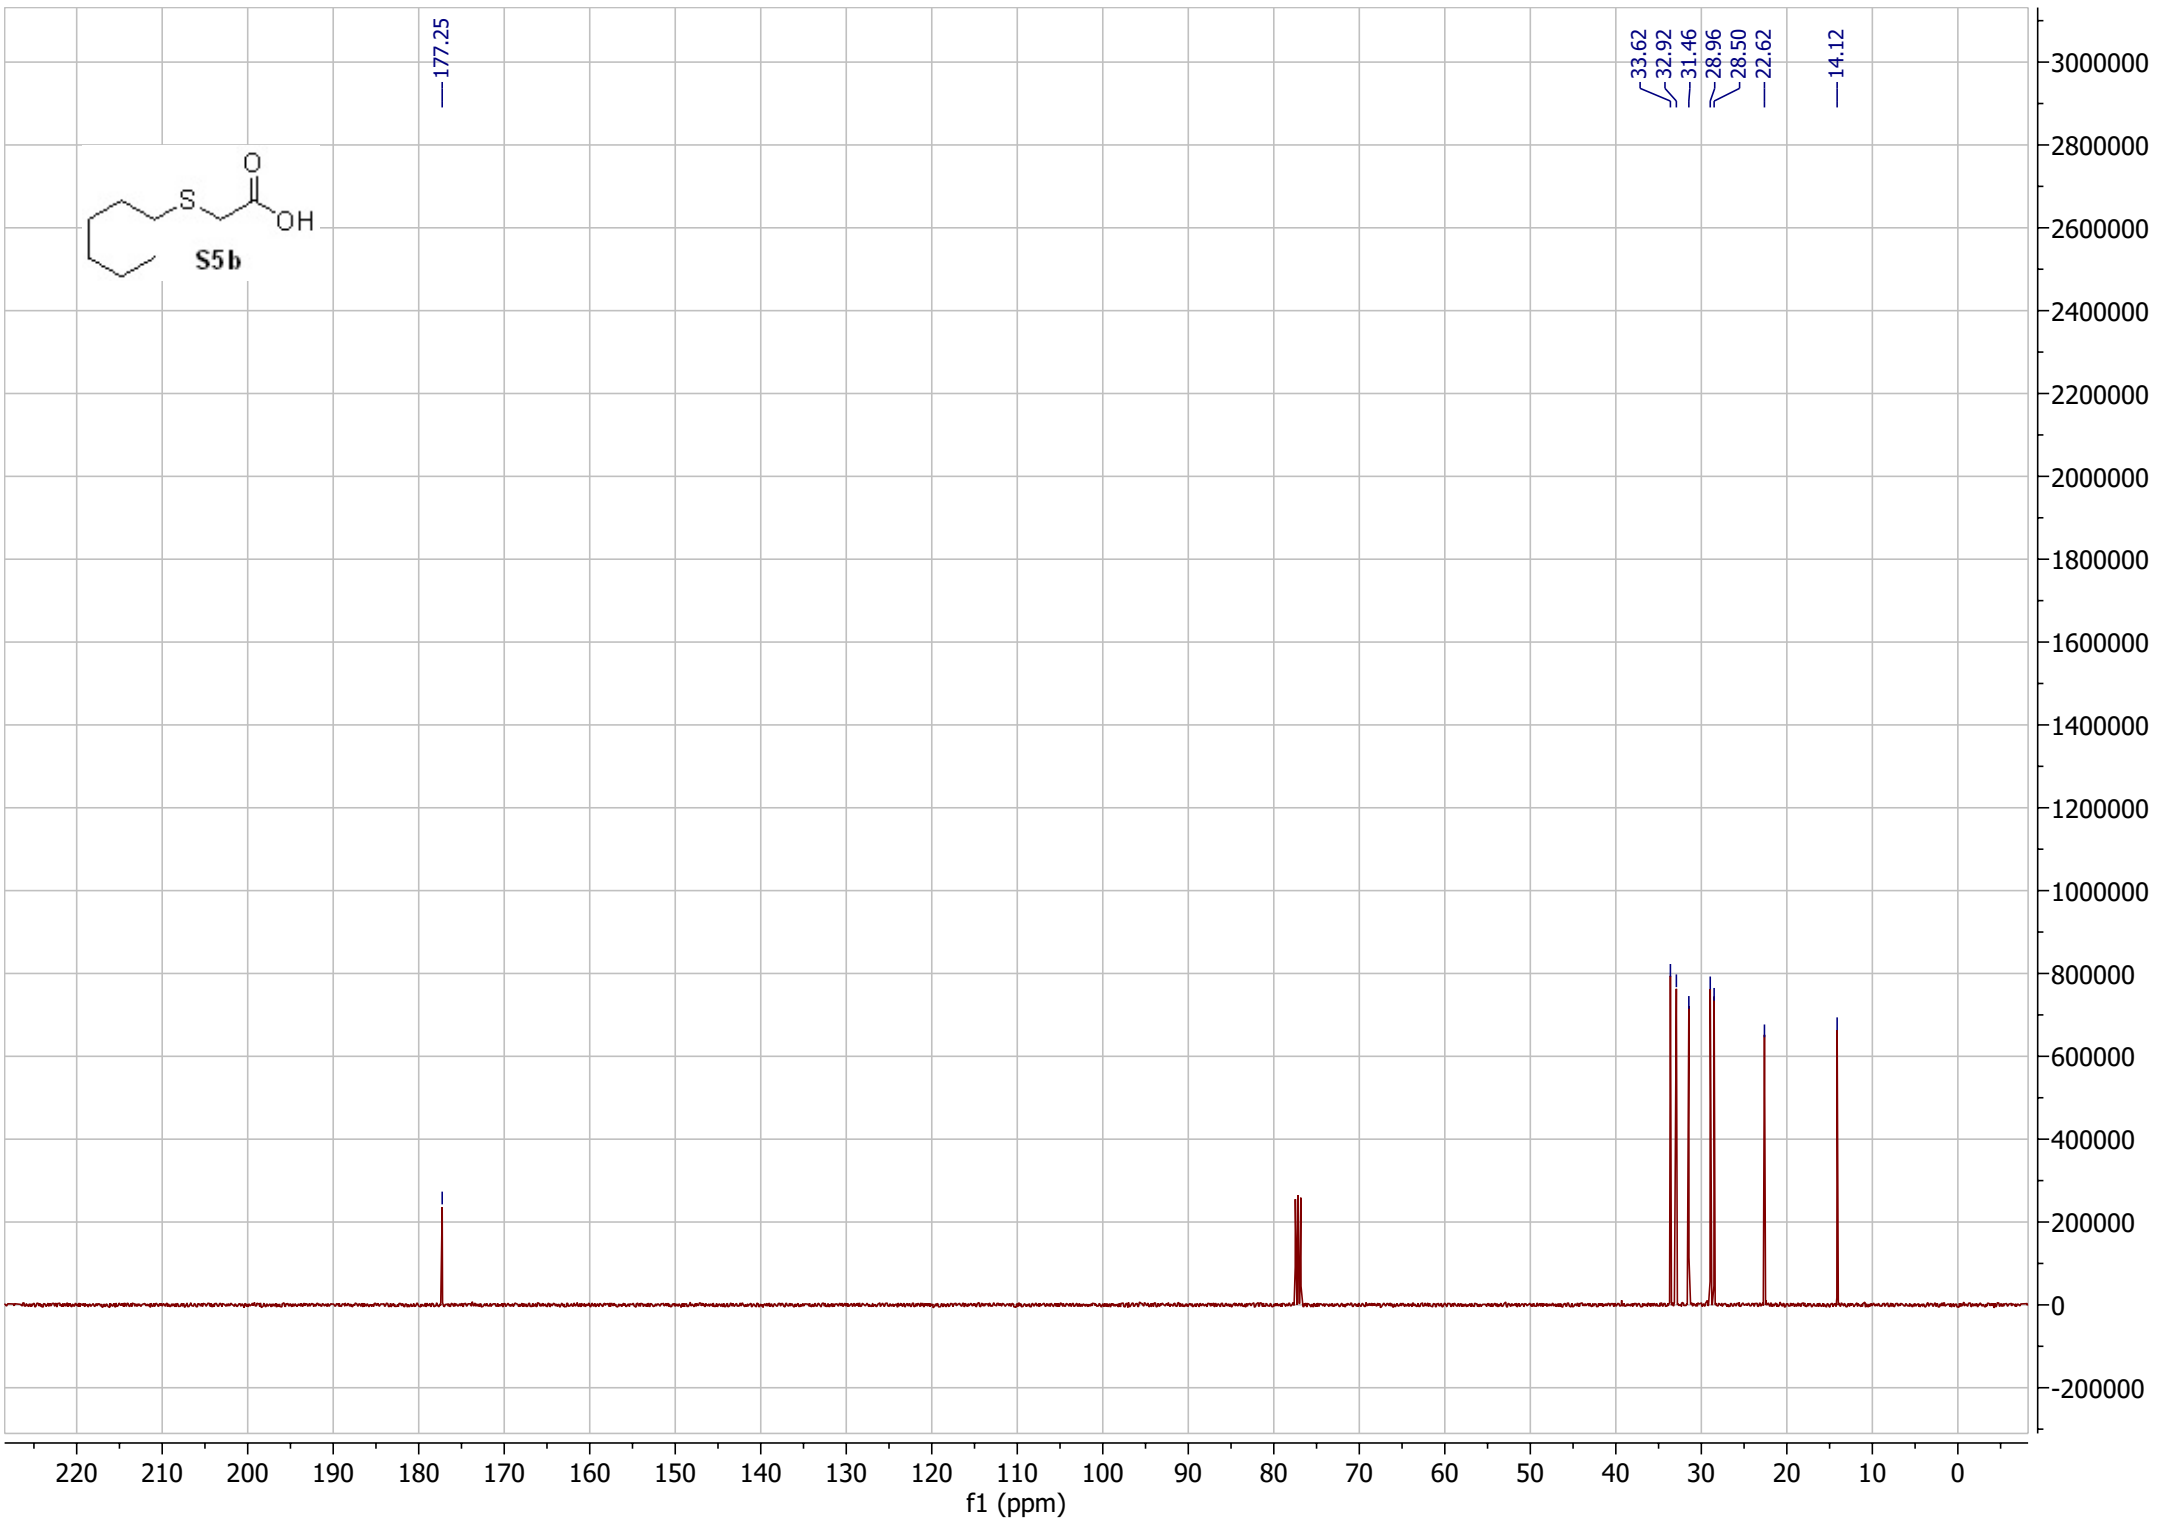

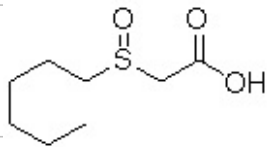

(-)-2b

3.93  
3.89  
3.74  
3.70  
2.95  
2.93  
2.93  
2.92  
2.91  
2.91  
2.90  
2.90  
1.82  
1.82  
1.80  
1.80  
1.78  
1.78  
1.76  
1.76  
1.75  
1.74  
1.74  
1.54  
1.53  
1.52  
1.51  
1.51  
1.50  
1.50  
1.49  
1.49  
1.48  
1.47  
1.47  
1.47  
1.46  
1.46  
1.42  
1.42  
1.41  
1.41  
1.40  
1.39  
1.39  
1.38  
1.38  
1.37  
1.37  
1.36  
1.36  
1.35  
1.34  
1.34  
1.34  
1.34  
1.33  
1.32  
1.32  
1.31  
1.31  
1.30  
1.30  
0.95  
0.94  
0.94  
0.93  
0.93  
0.92  
0.92  
0.91  
0.91  
0.90

$4.5 \times 10^7$   
 $4.0 \times 10^7$   
 $3.5 \times 10^7$   
 $3.0 \times 10^7$   
 $2.5 \times 10^7$   
 $2.0 \times 10^7$   
 $1.5 \times 10^7$   
 $1.0 \times 10^7$   
 $5.0 \times 10^6$   
0.0

13 12 11 10 9 8 7 6 5 4 3 2 1 0 -1

f1 (ppm)

1.02  
1.00  
1.98  
1.87  
1.30  
5.29  
3.15

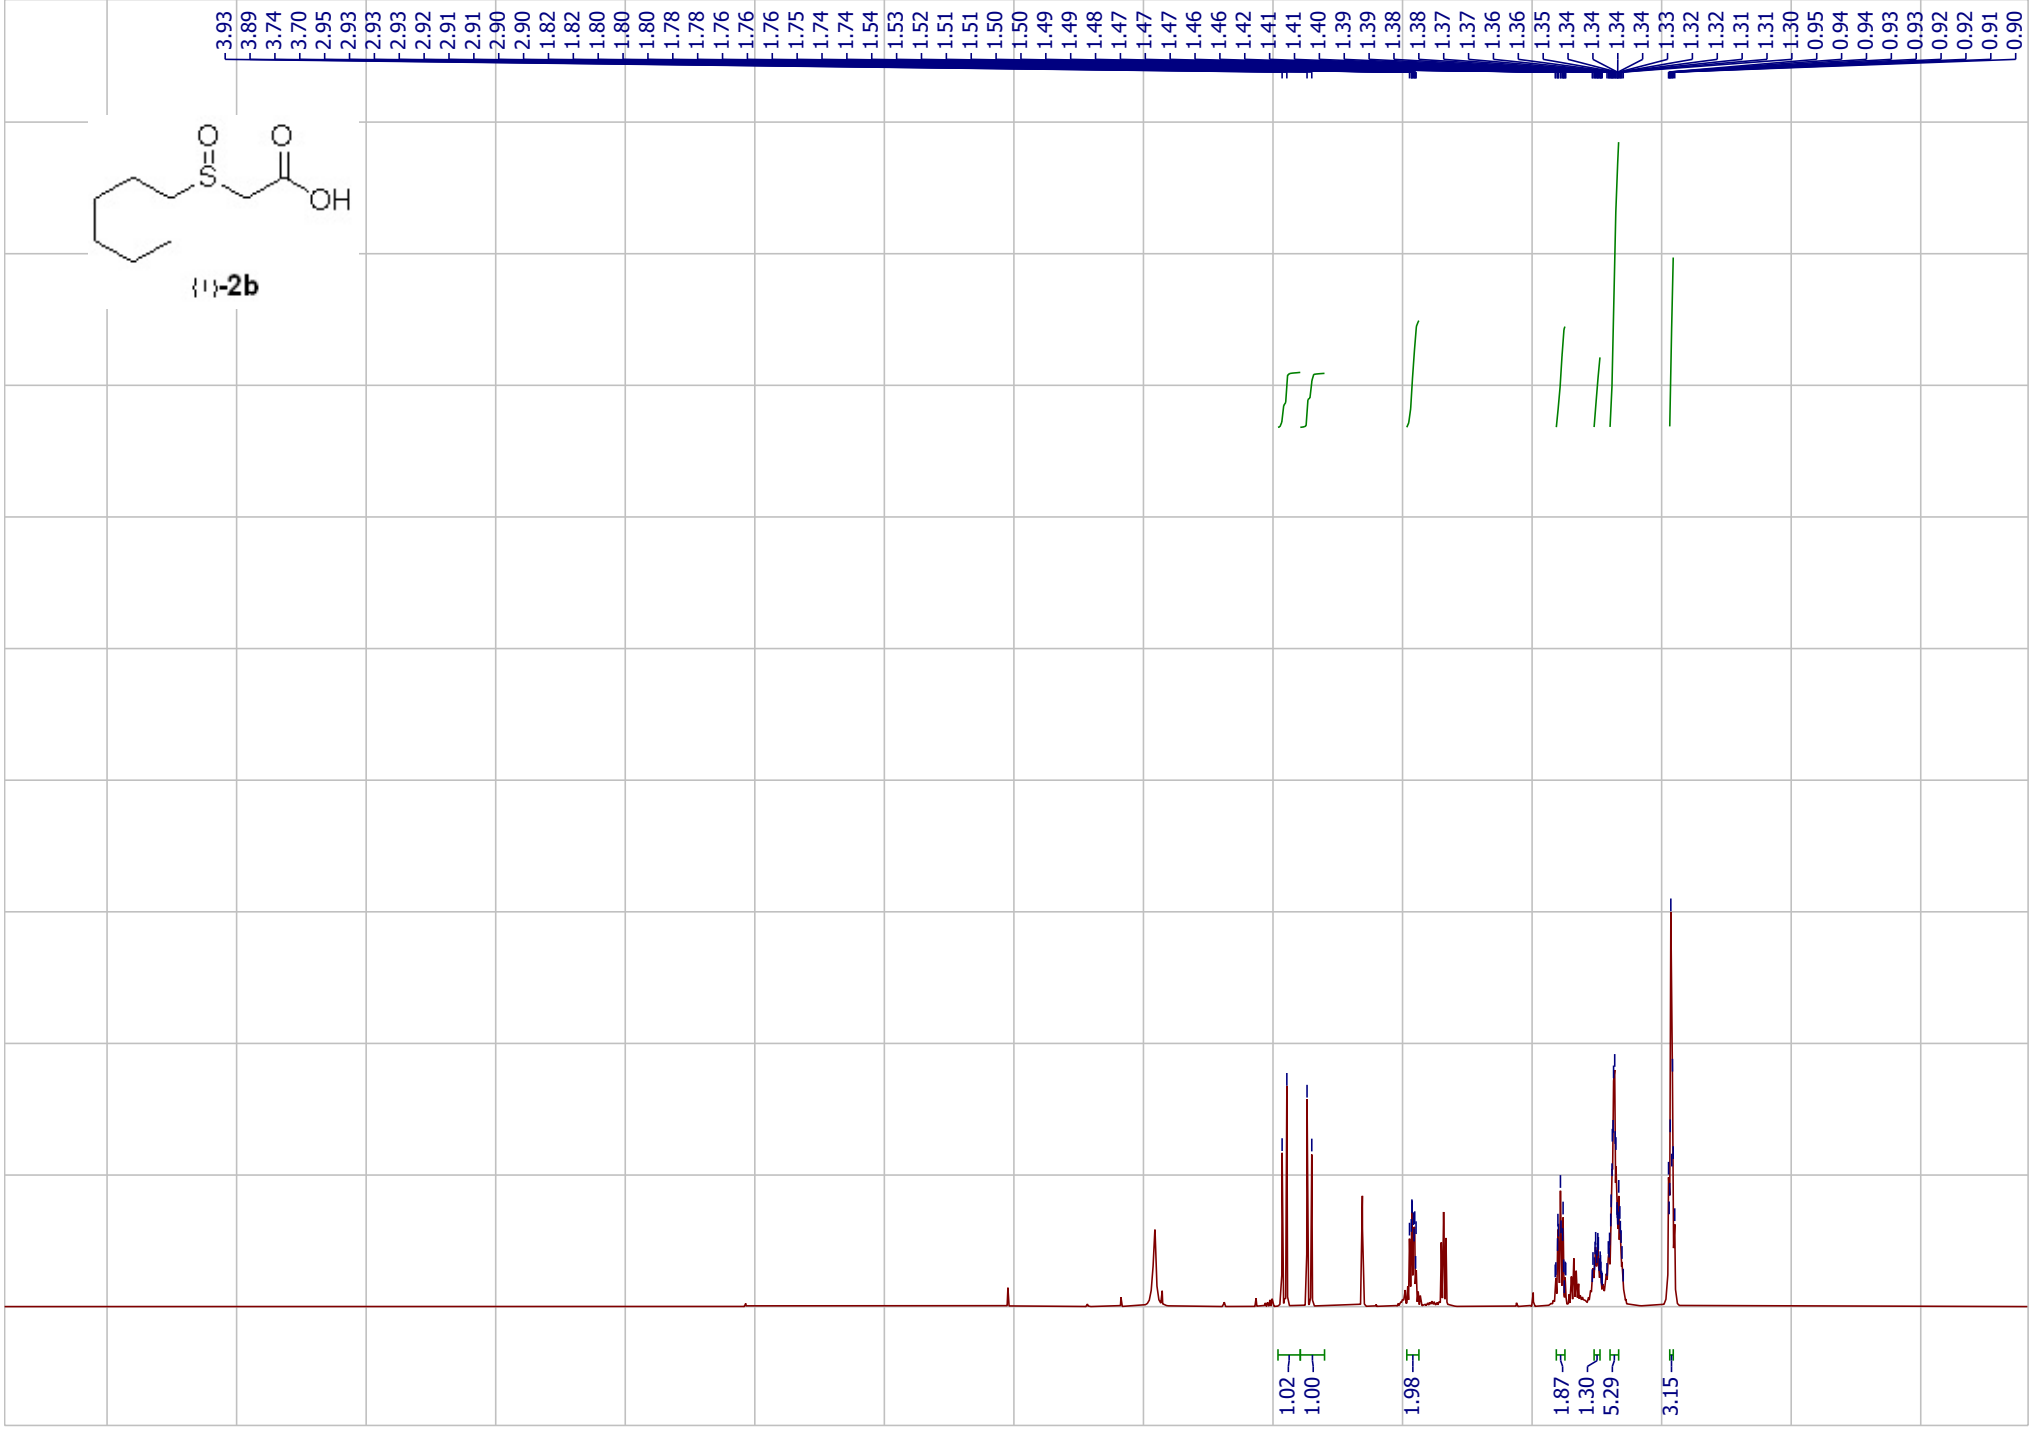

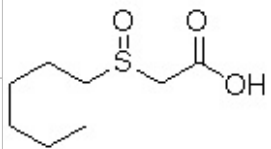

(1)-2b

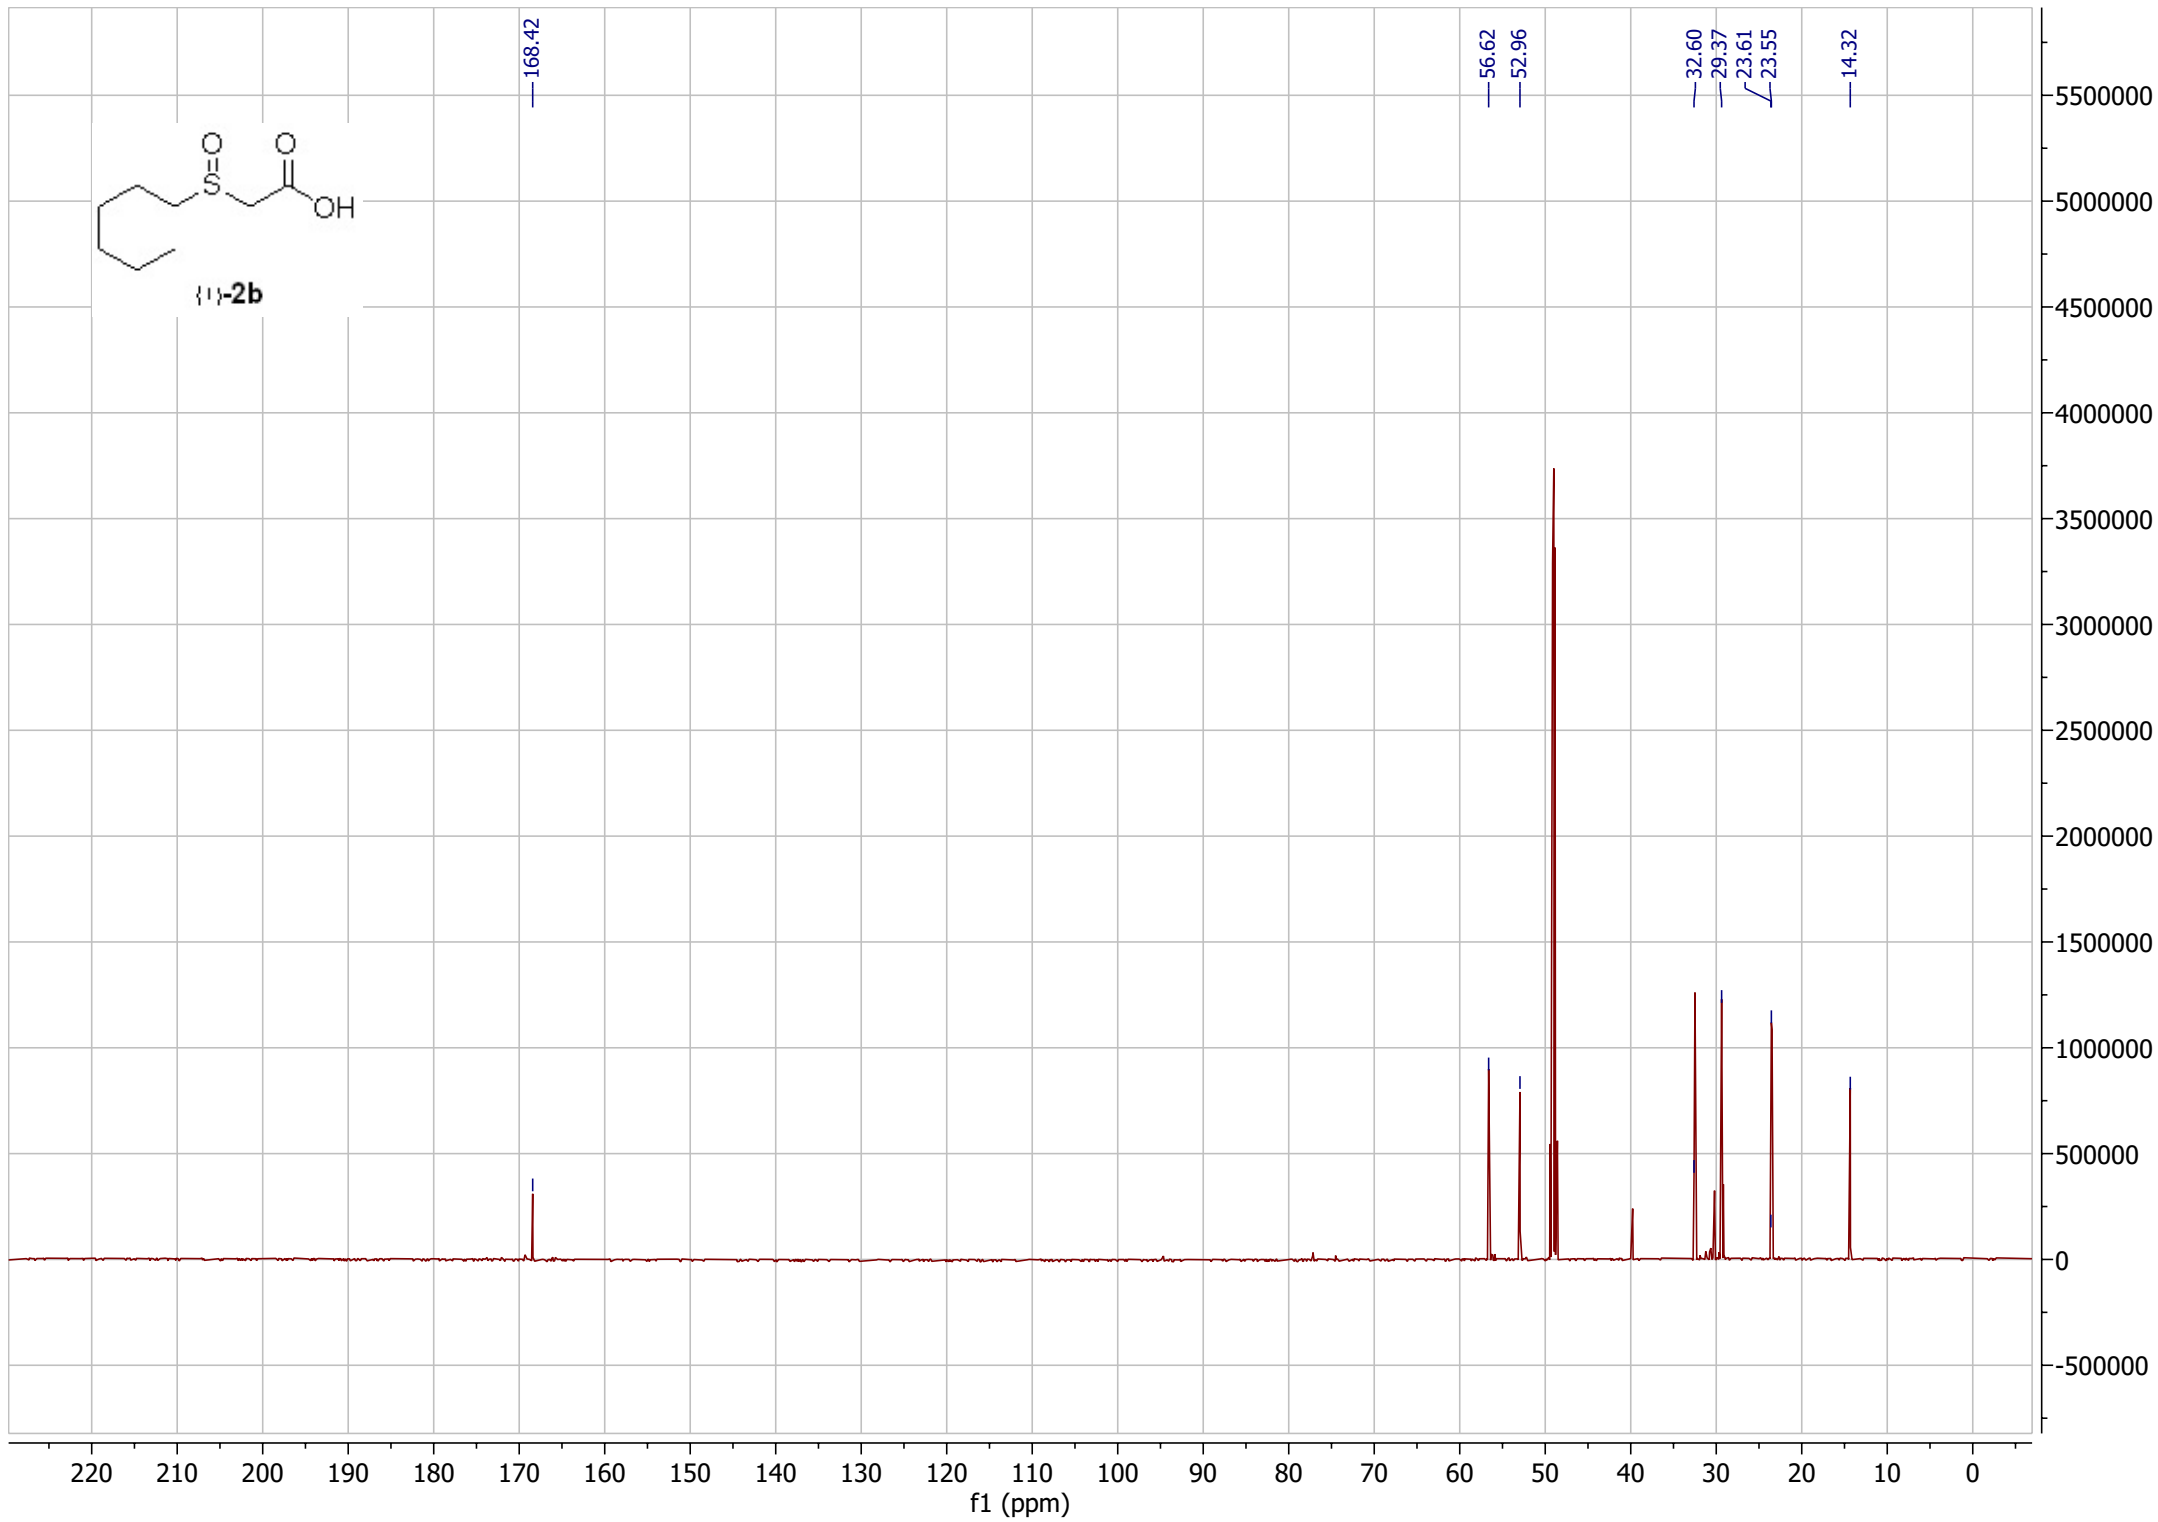

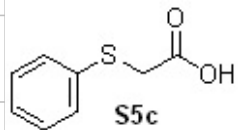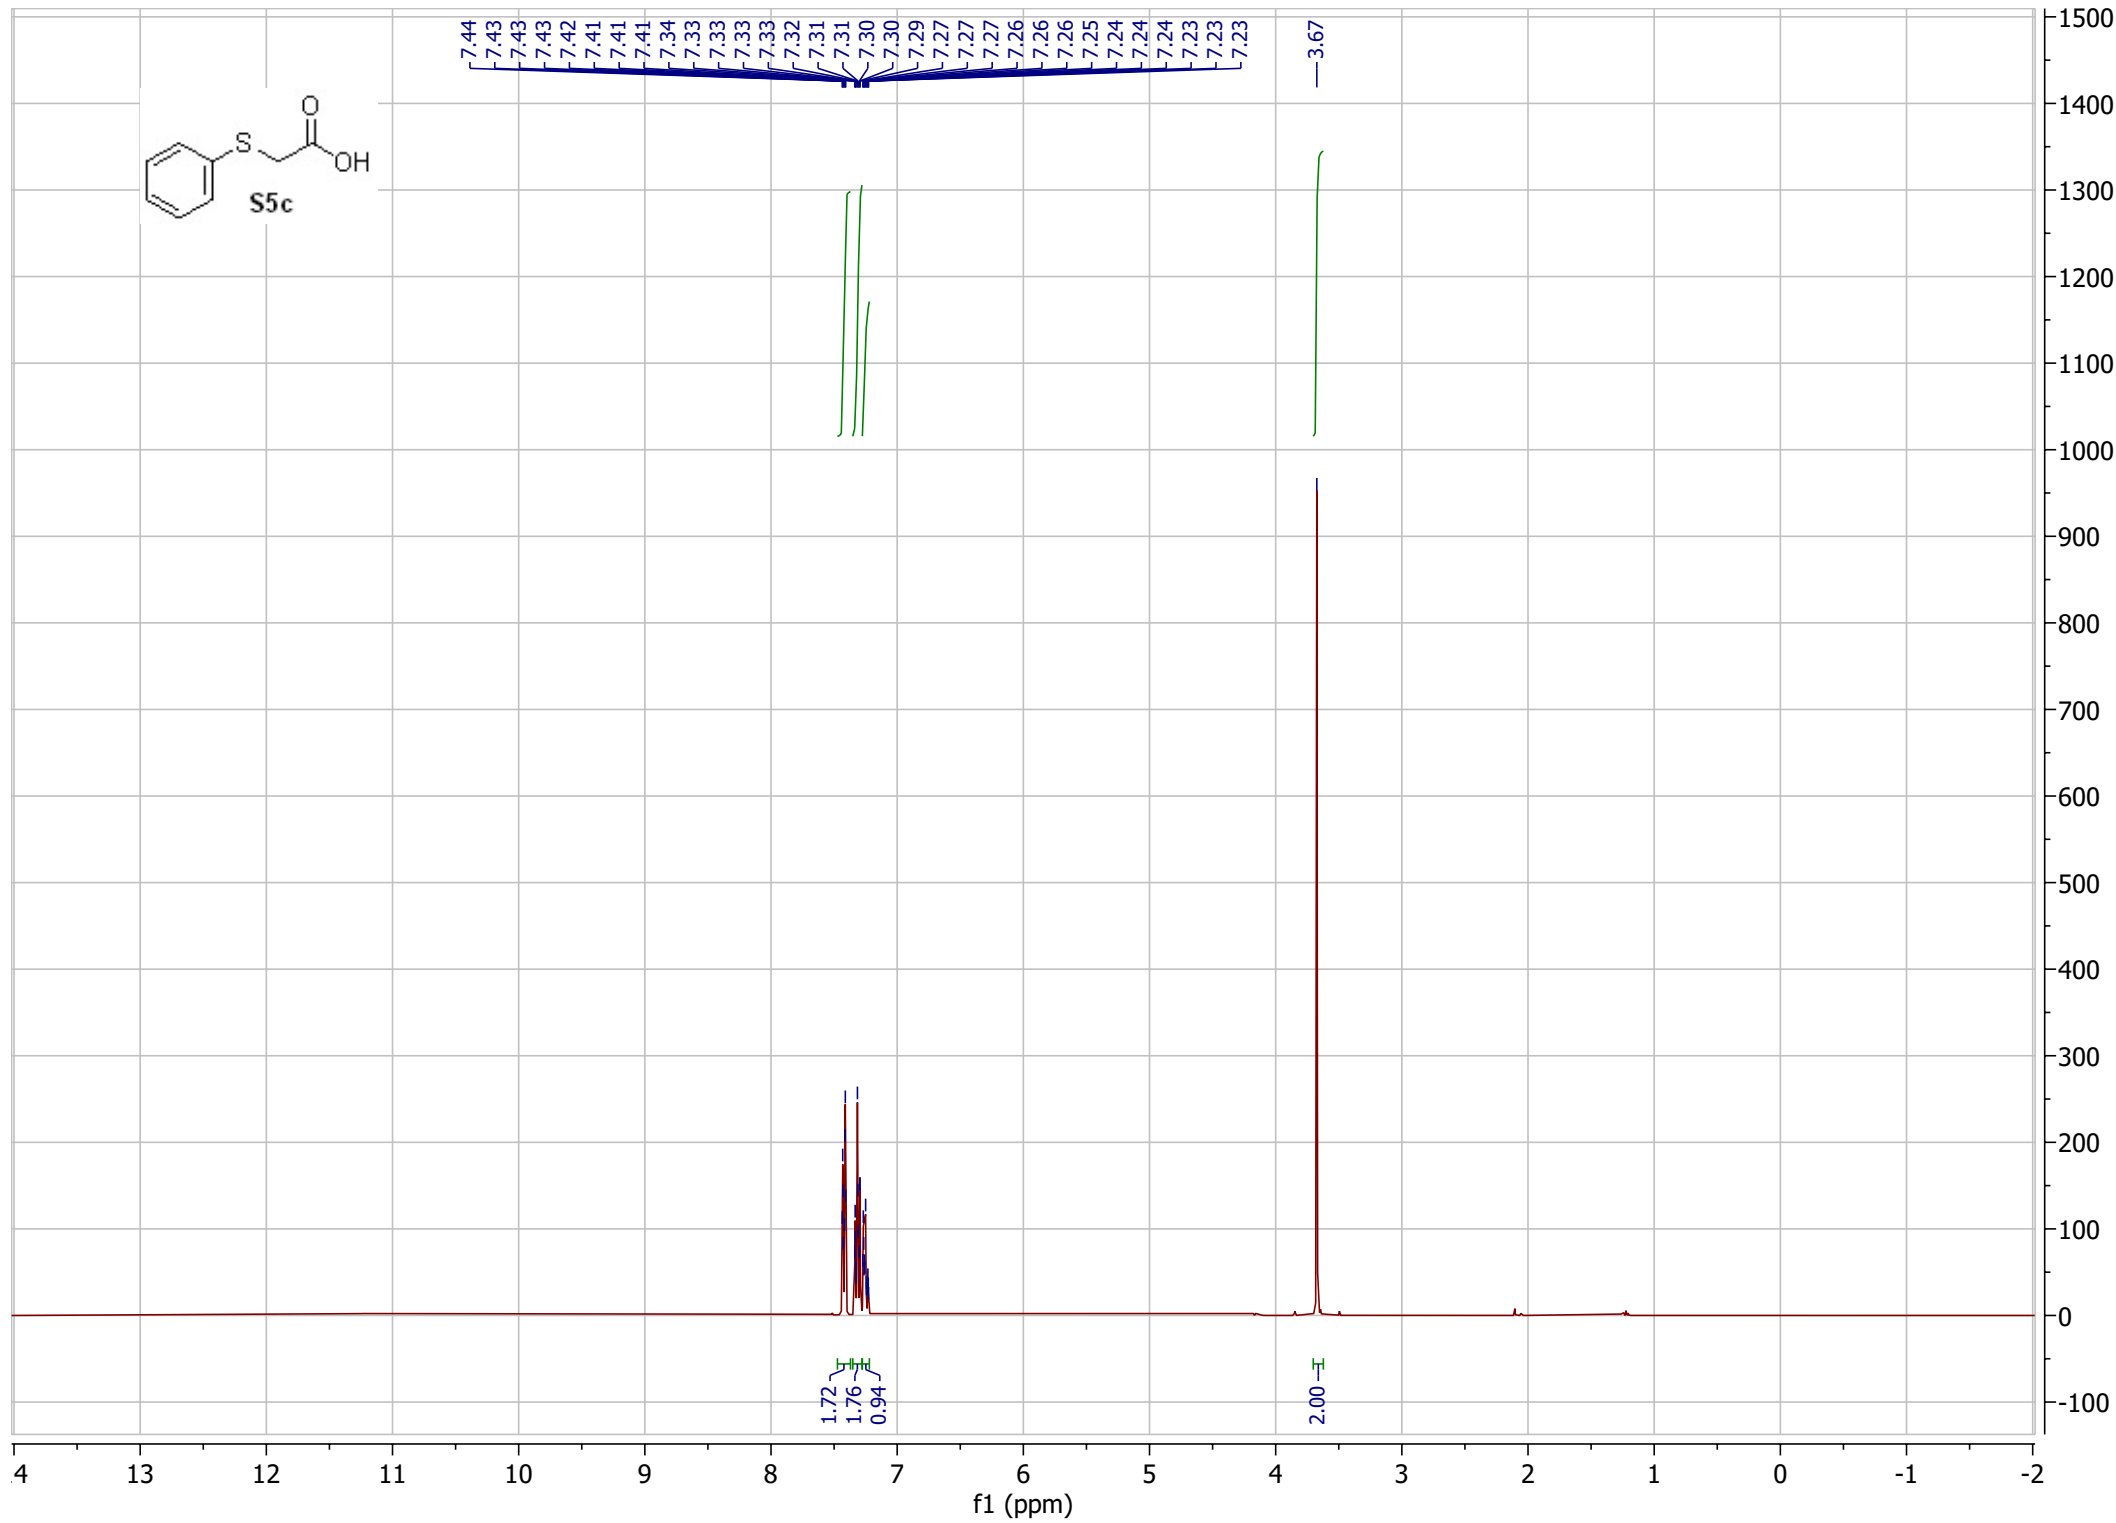

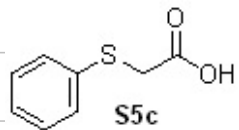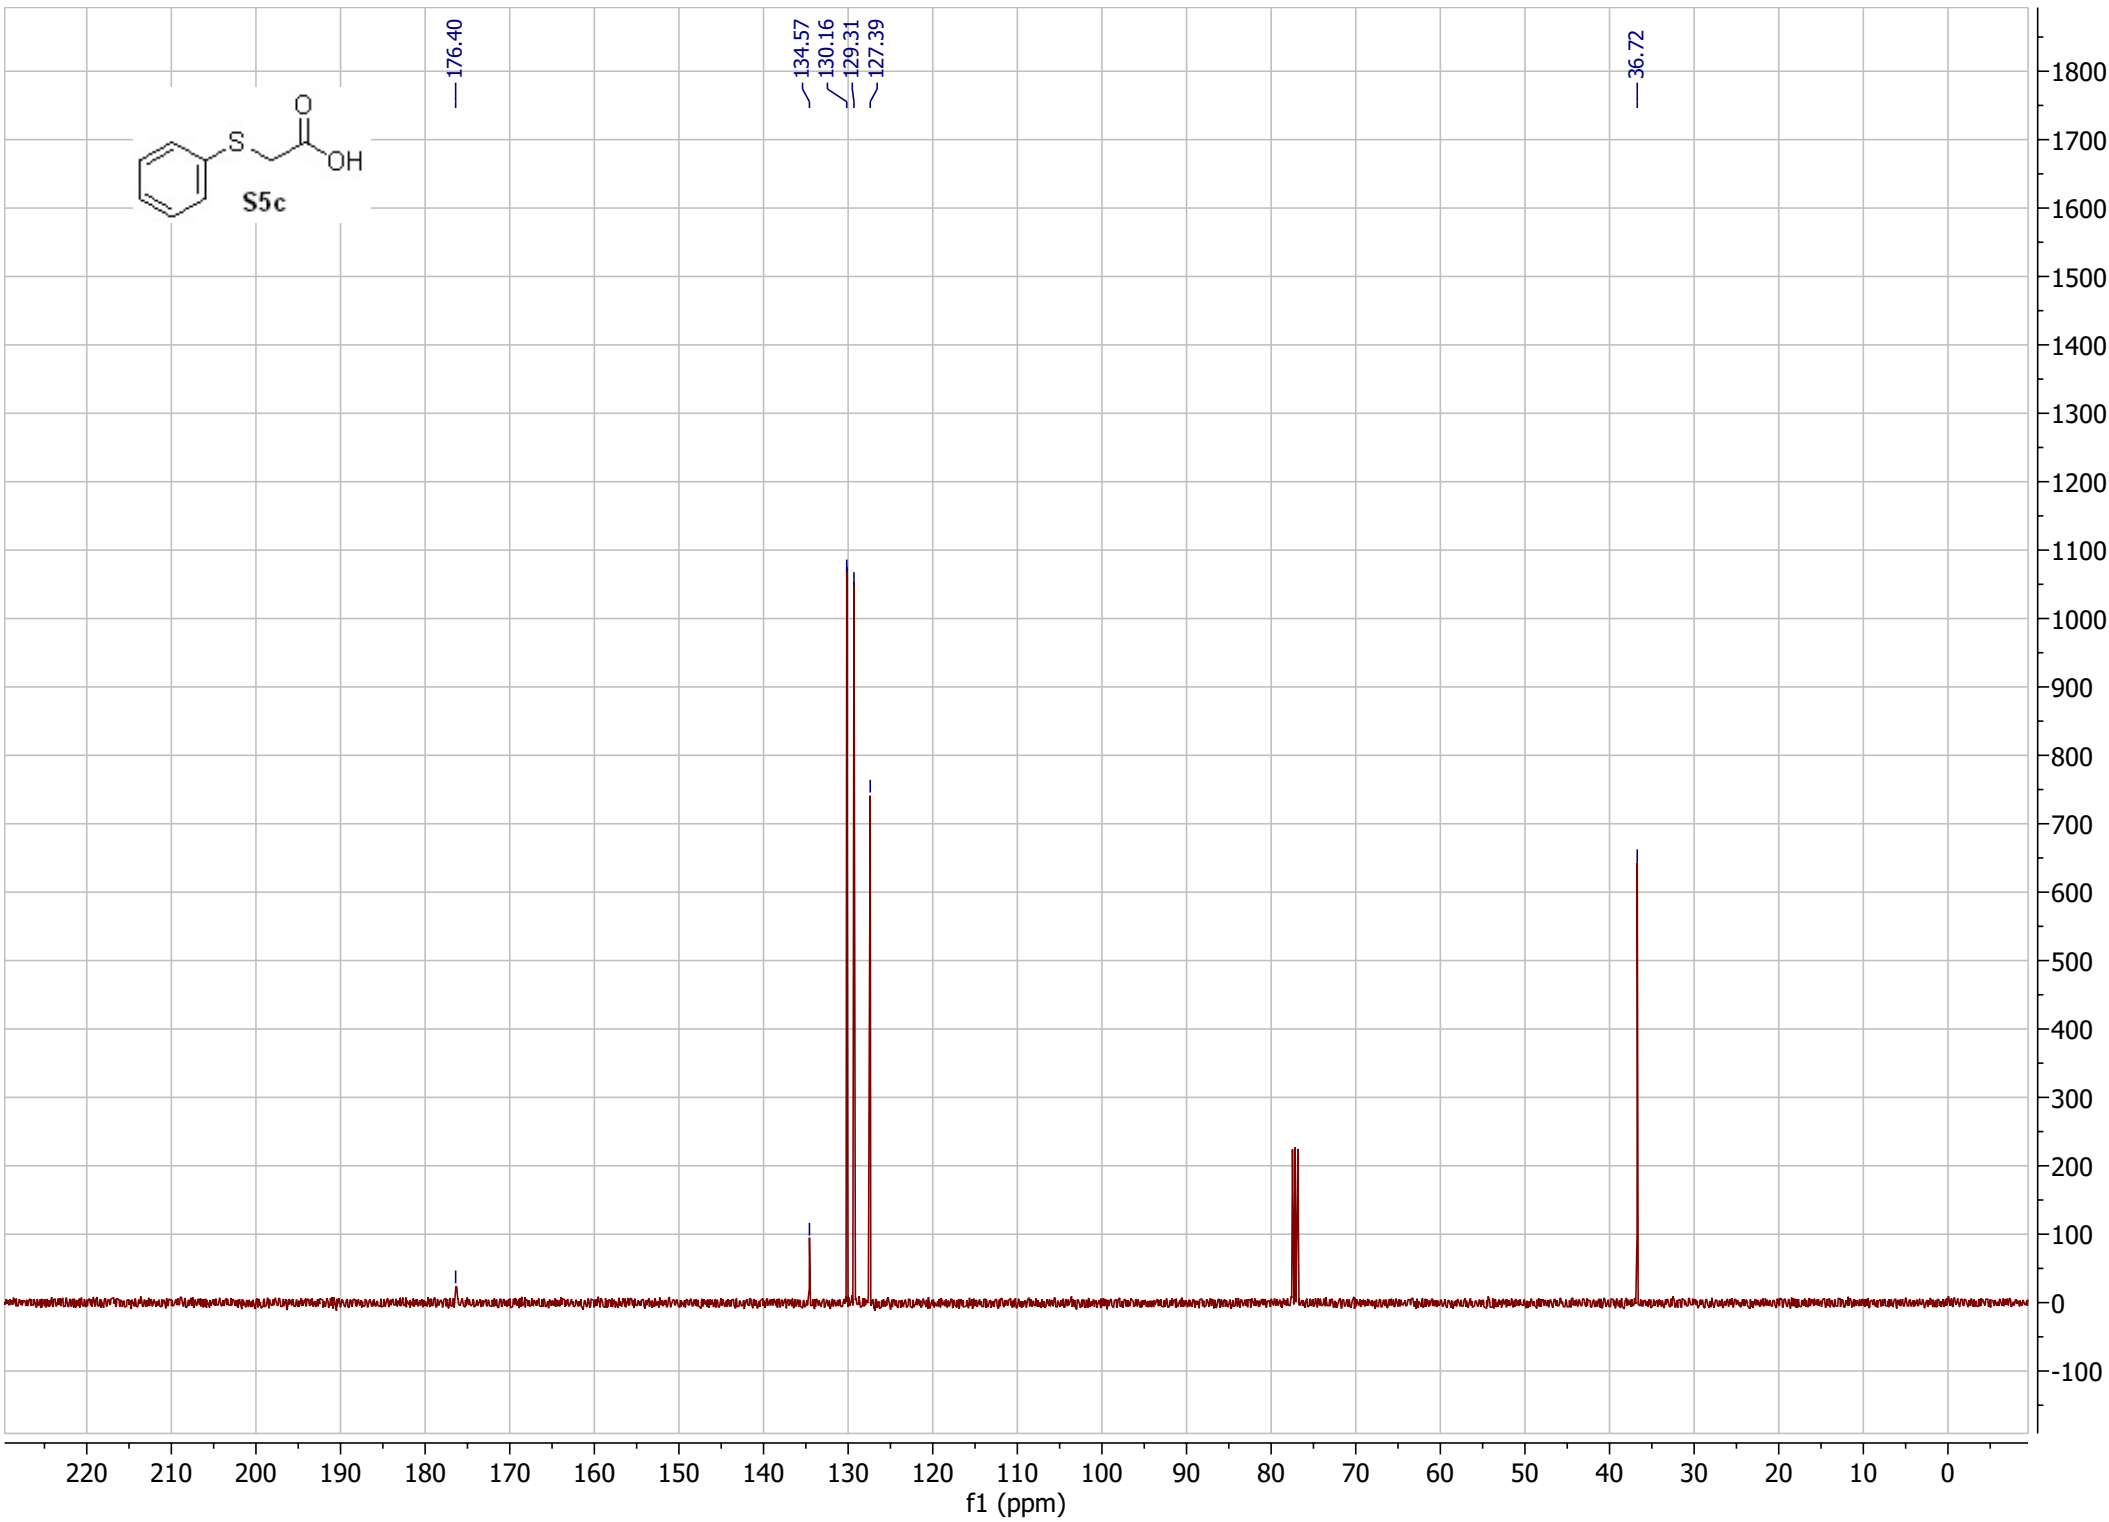

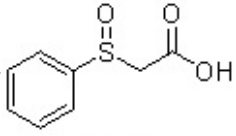

(+)-2c

7.78  
7.77  
7.77  
7.77  
7.76  
7.76  
7.76  
7.75  
7.75  
7.74  
7.74  
7.74  
7.73  
7.73  
7.73  
7.72  
7.63  
7.62  
7.61  
7.61  
7.60  
7.60  
7.60  
7.59  
7.58  
7.58  
7.57

3.95  
3.91  
3.89  
3.85

1.80  
2.76

1.00  
0.98

f1 (ppm)

13 12 11 10 9 8 7 6 5 4 3 2 1 0 -1

$8.0 \times 10^7$   
 $7.5 \times 10^7$   
 $7.0 \times 10^7$   
 $6.5 \times 10^7$   
 $6.0 \times 10^7$   
 $5.5 \times 10^7$   
 $5.0 \times 10^7$   
 $4.5 \times 10^7$   
 $4.0 \times 10^7$   
 $3.5 \times 10^7$   
 $3.0 \times 10^7$   
 $2.5 \times 10^7$   
 $2.0 \times 10^7$   
 $1.5 \times 10^7$   
 $1.0 \times 10^7$   
 $5.0 \times 10^6$   
0.0  
 $-5.0 \times 10^6$

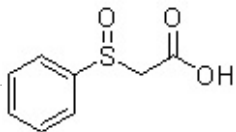

(+)-2c

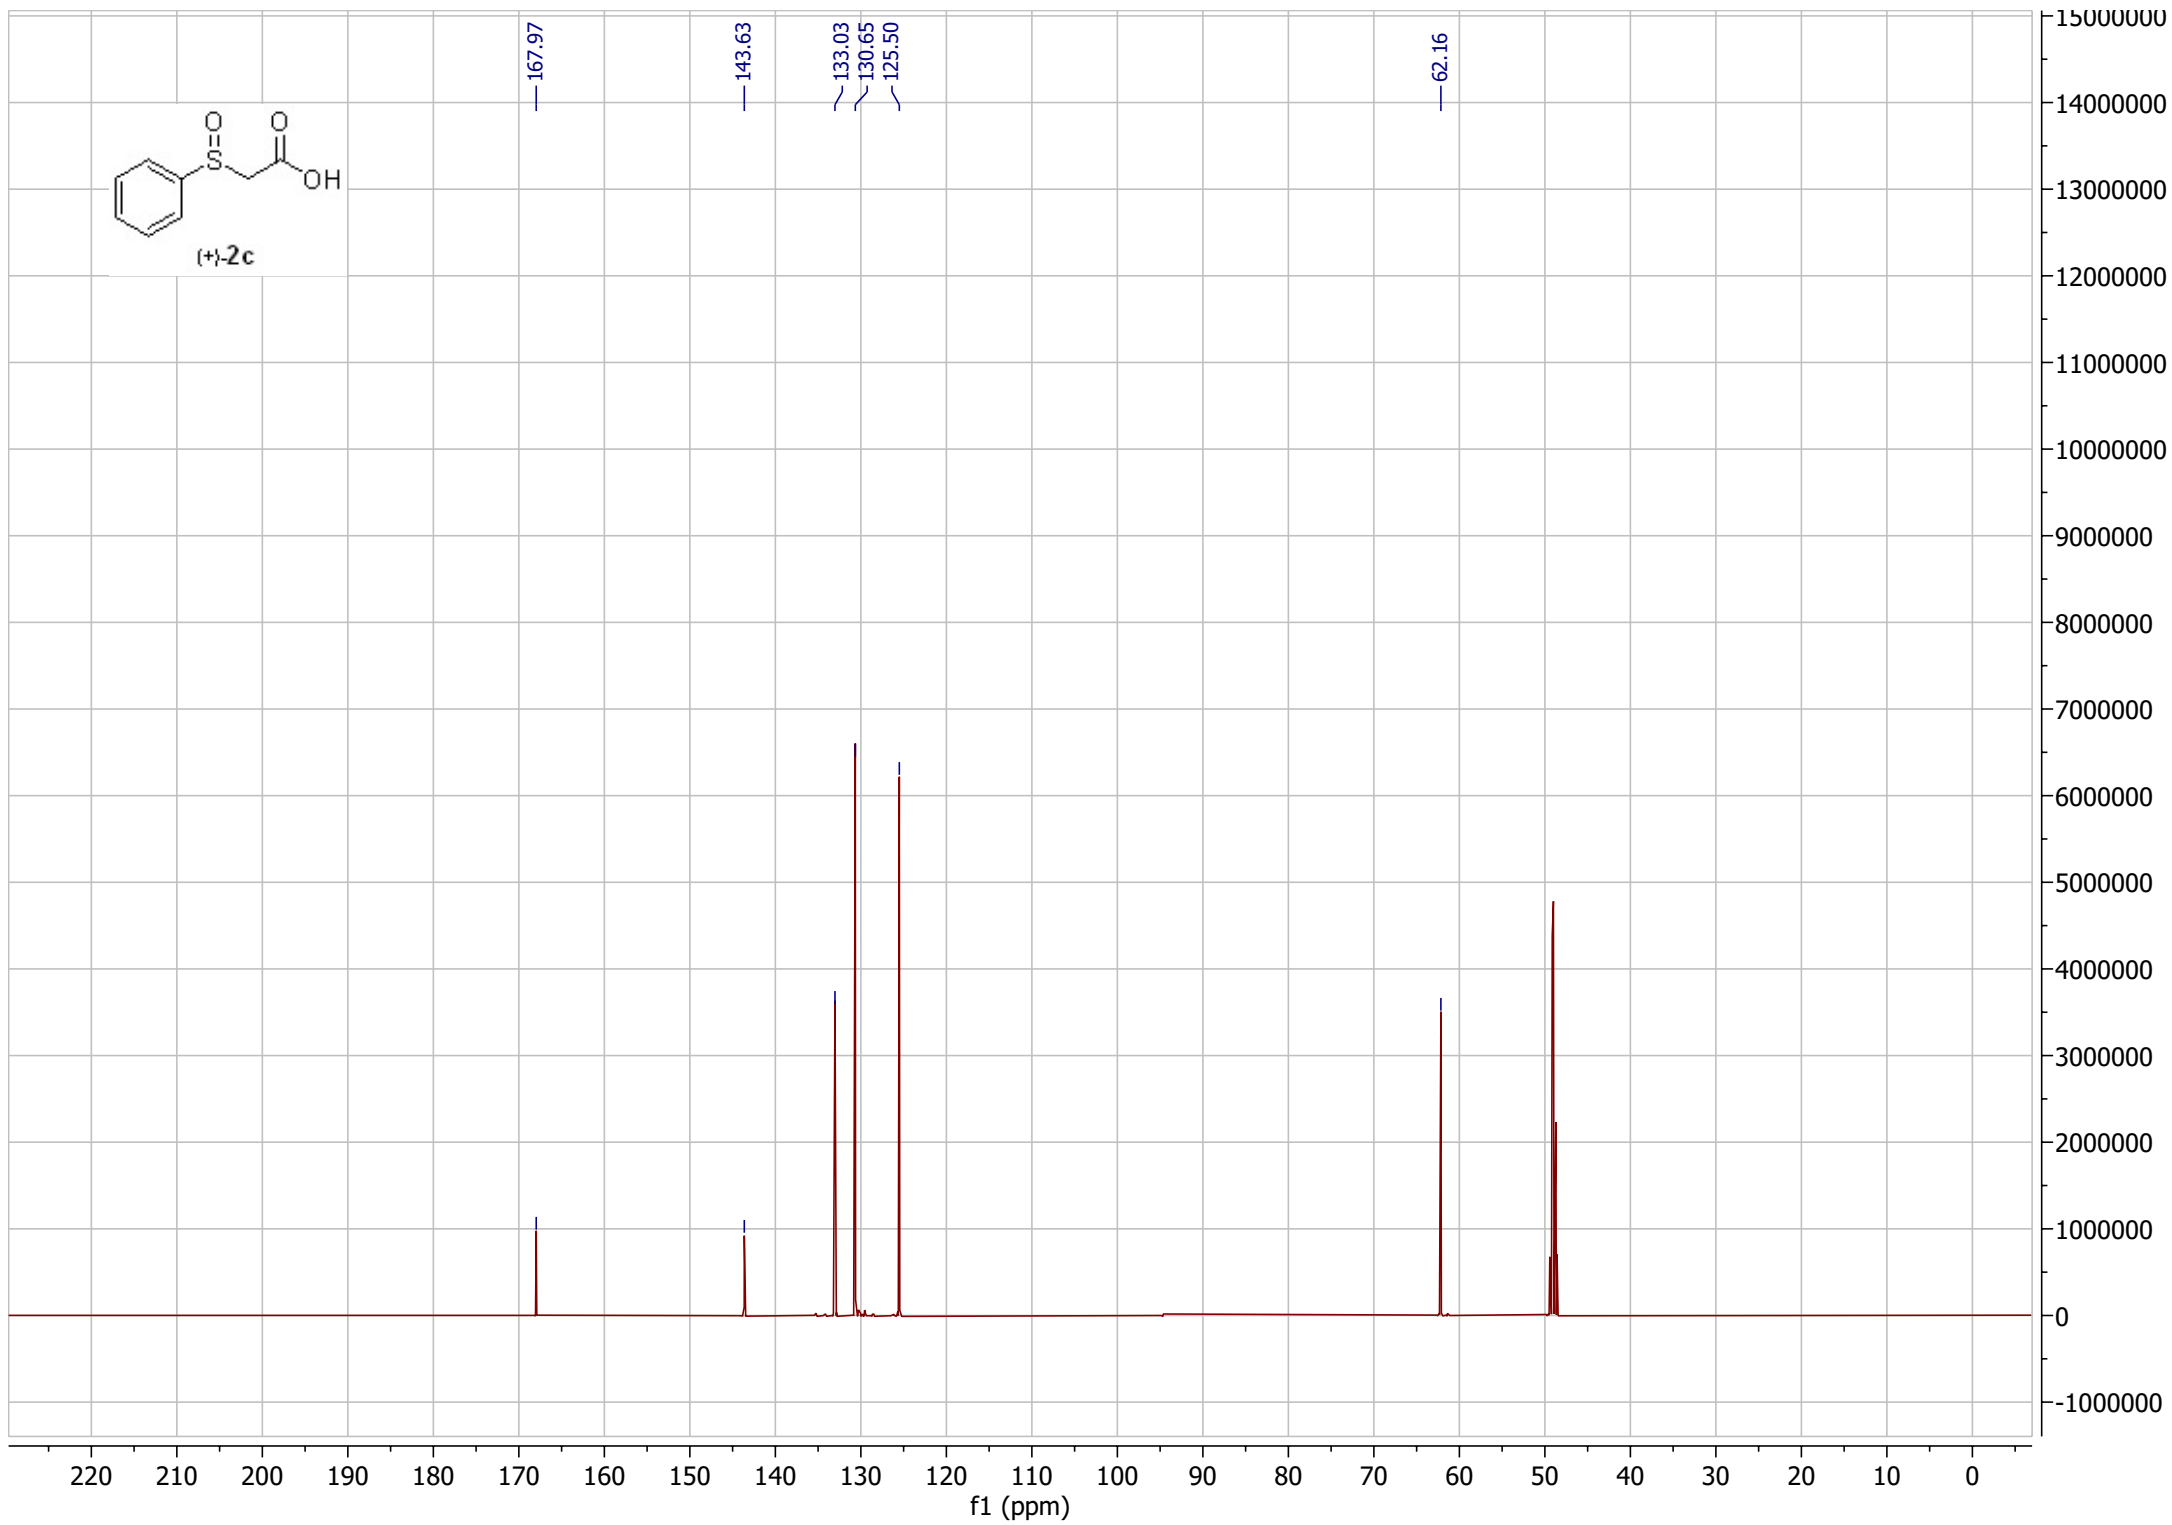



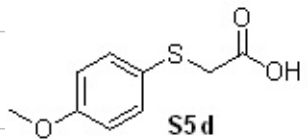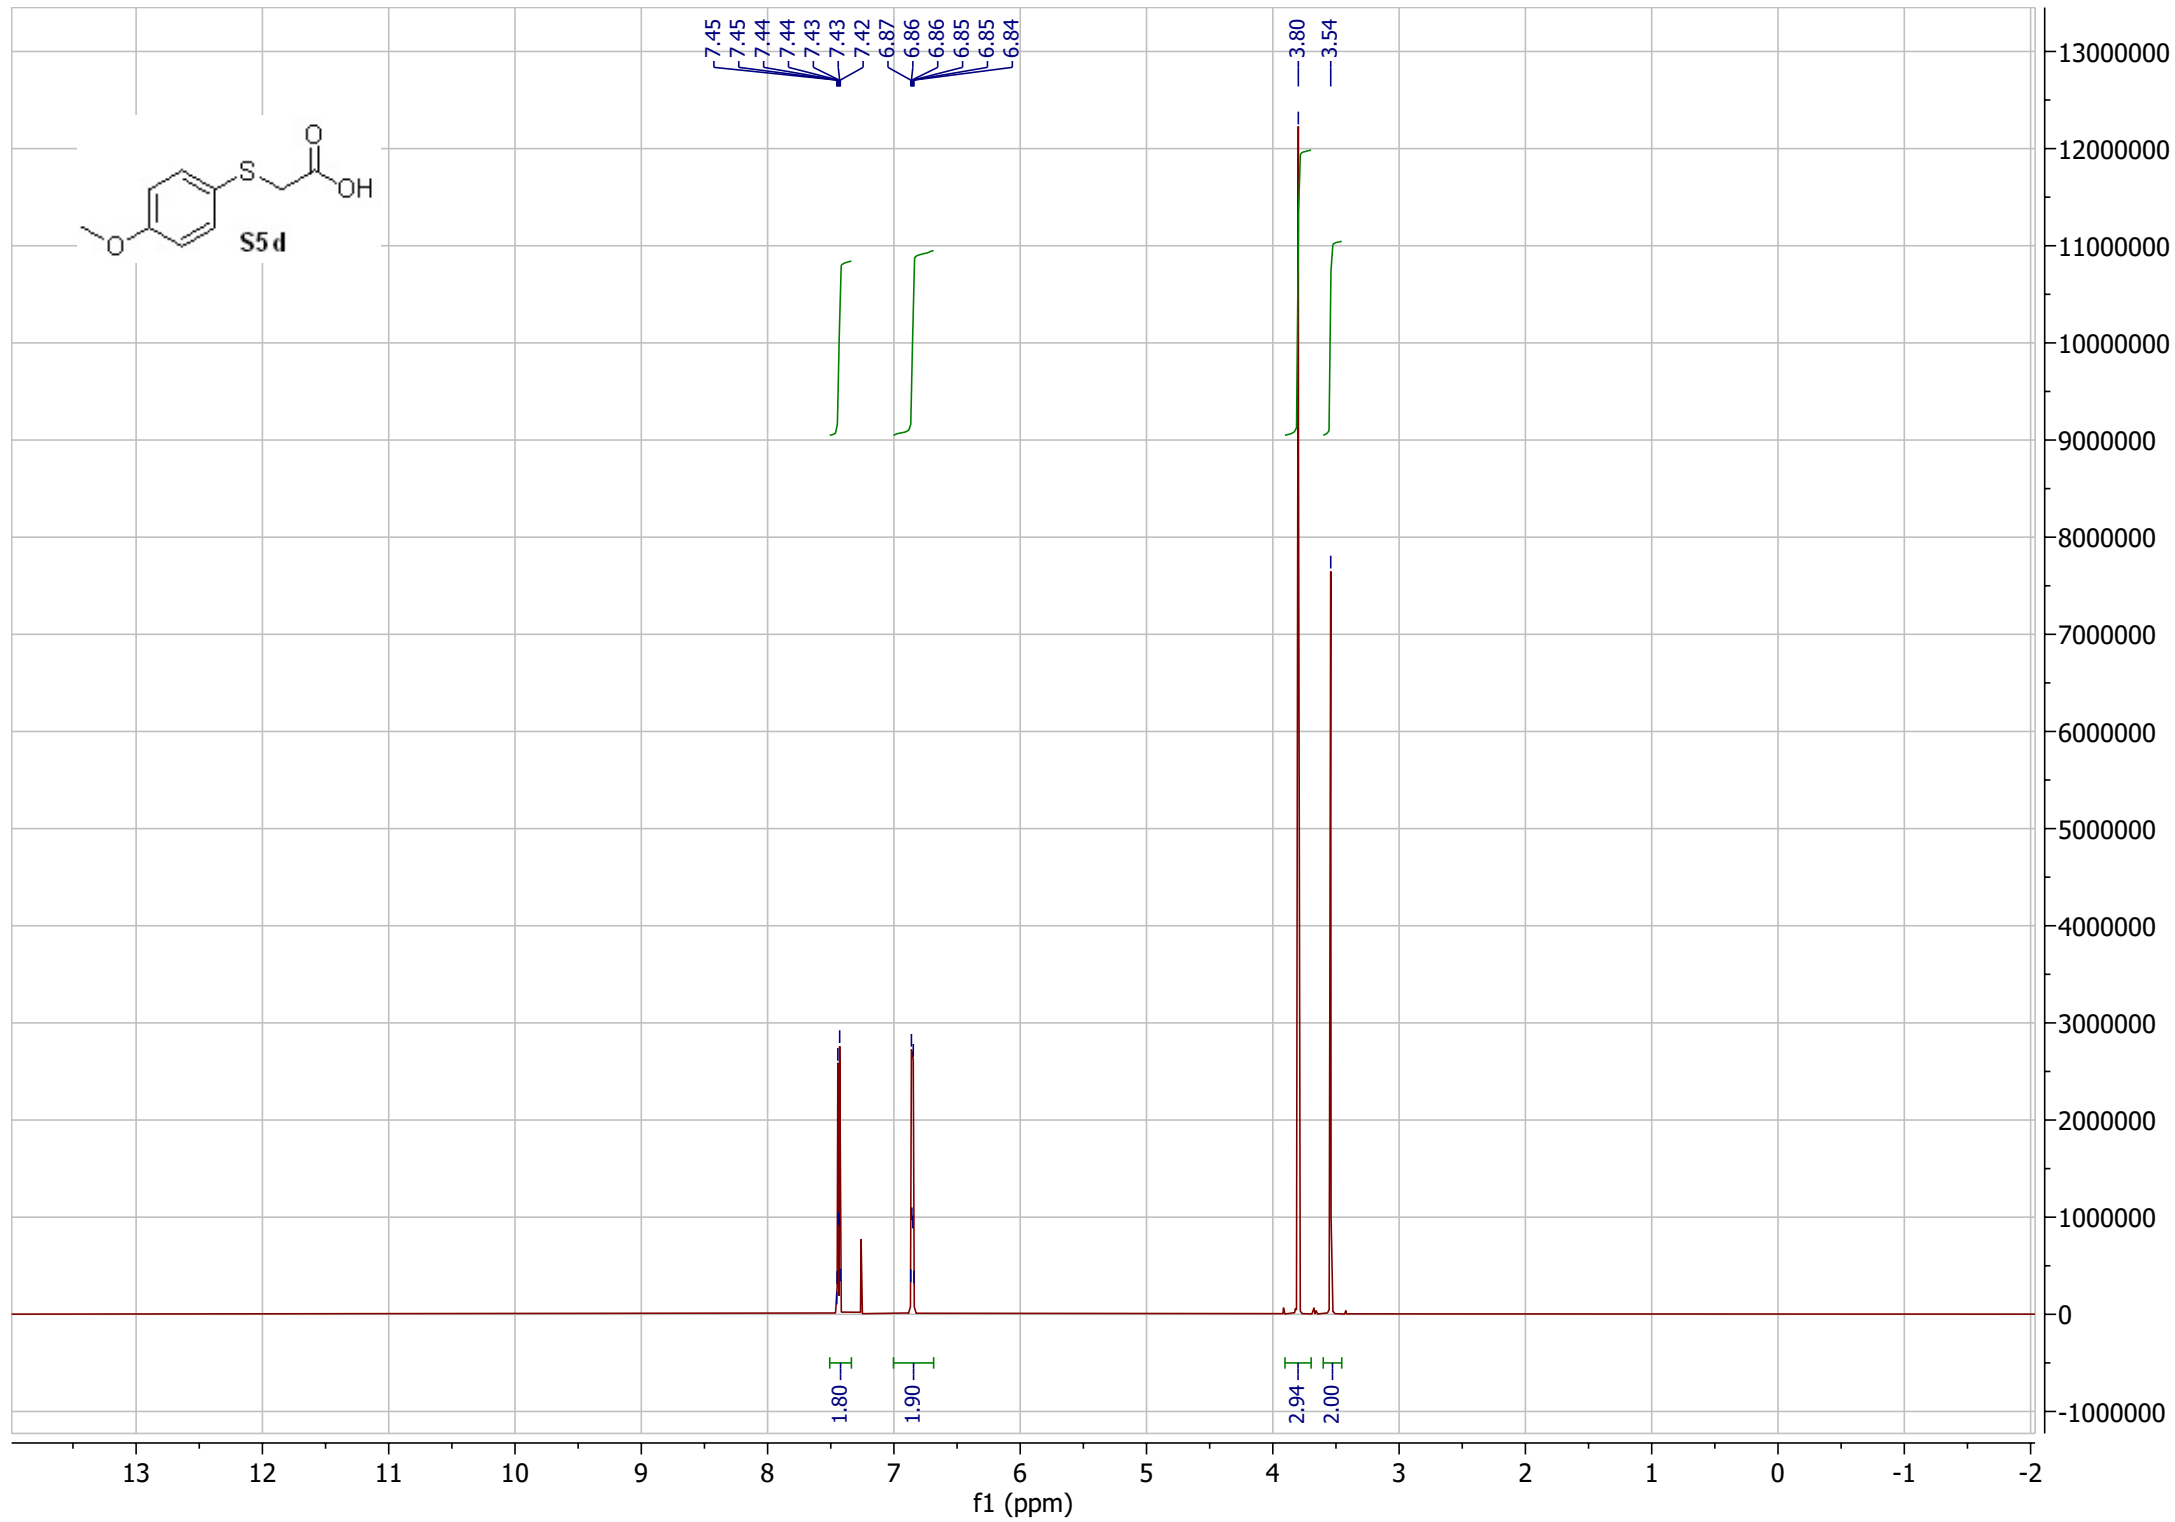

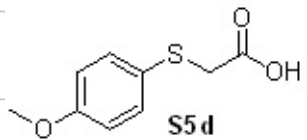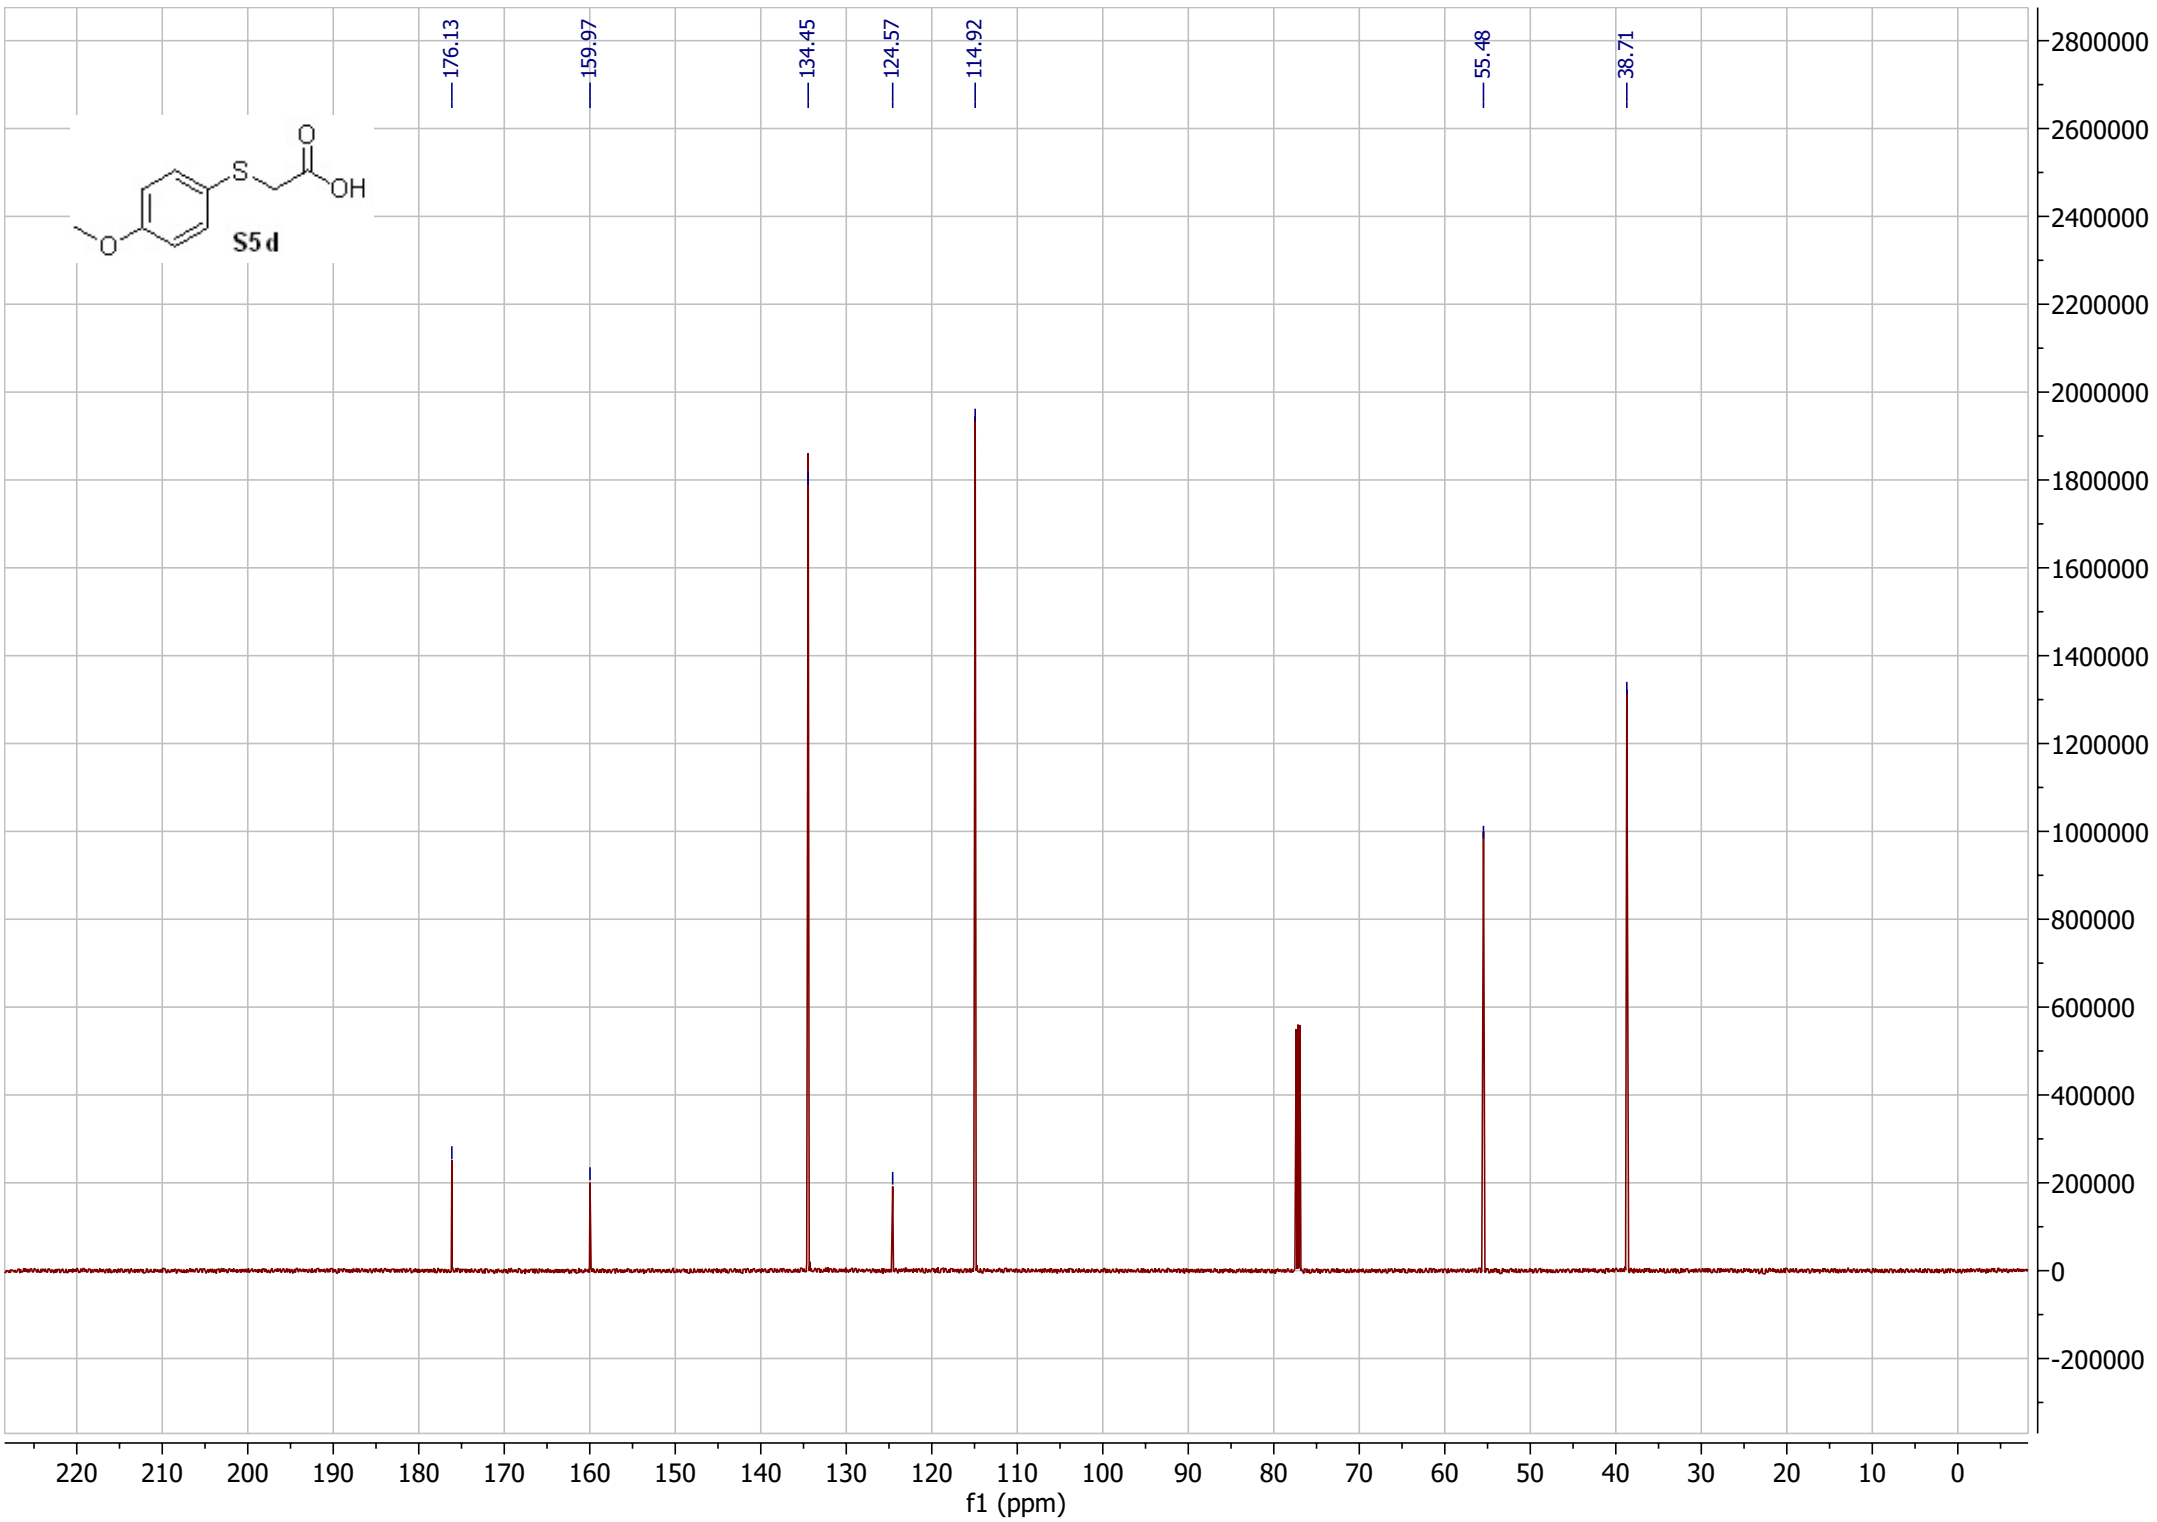

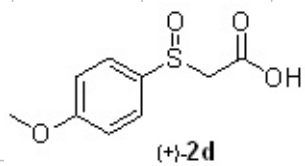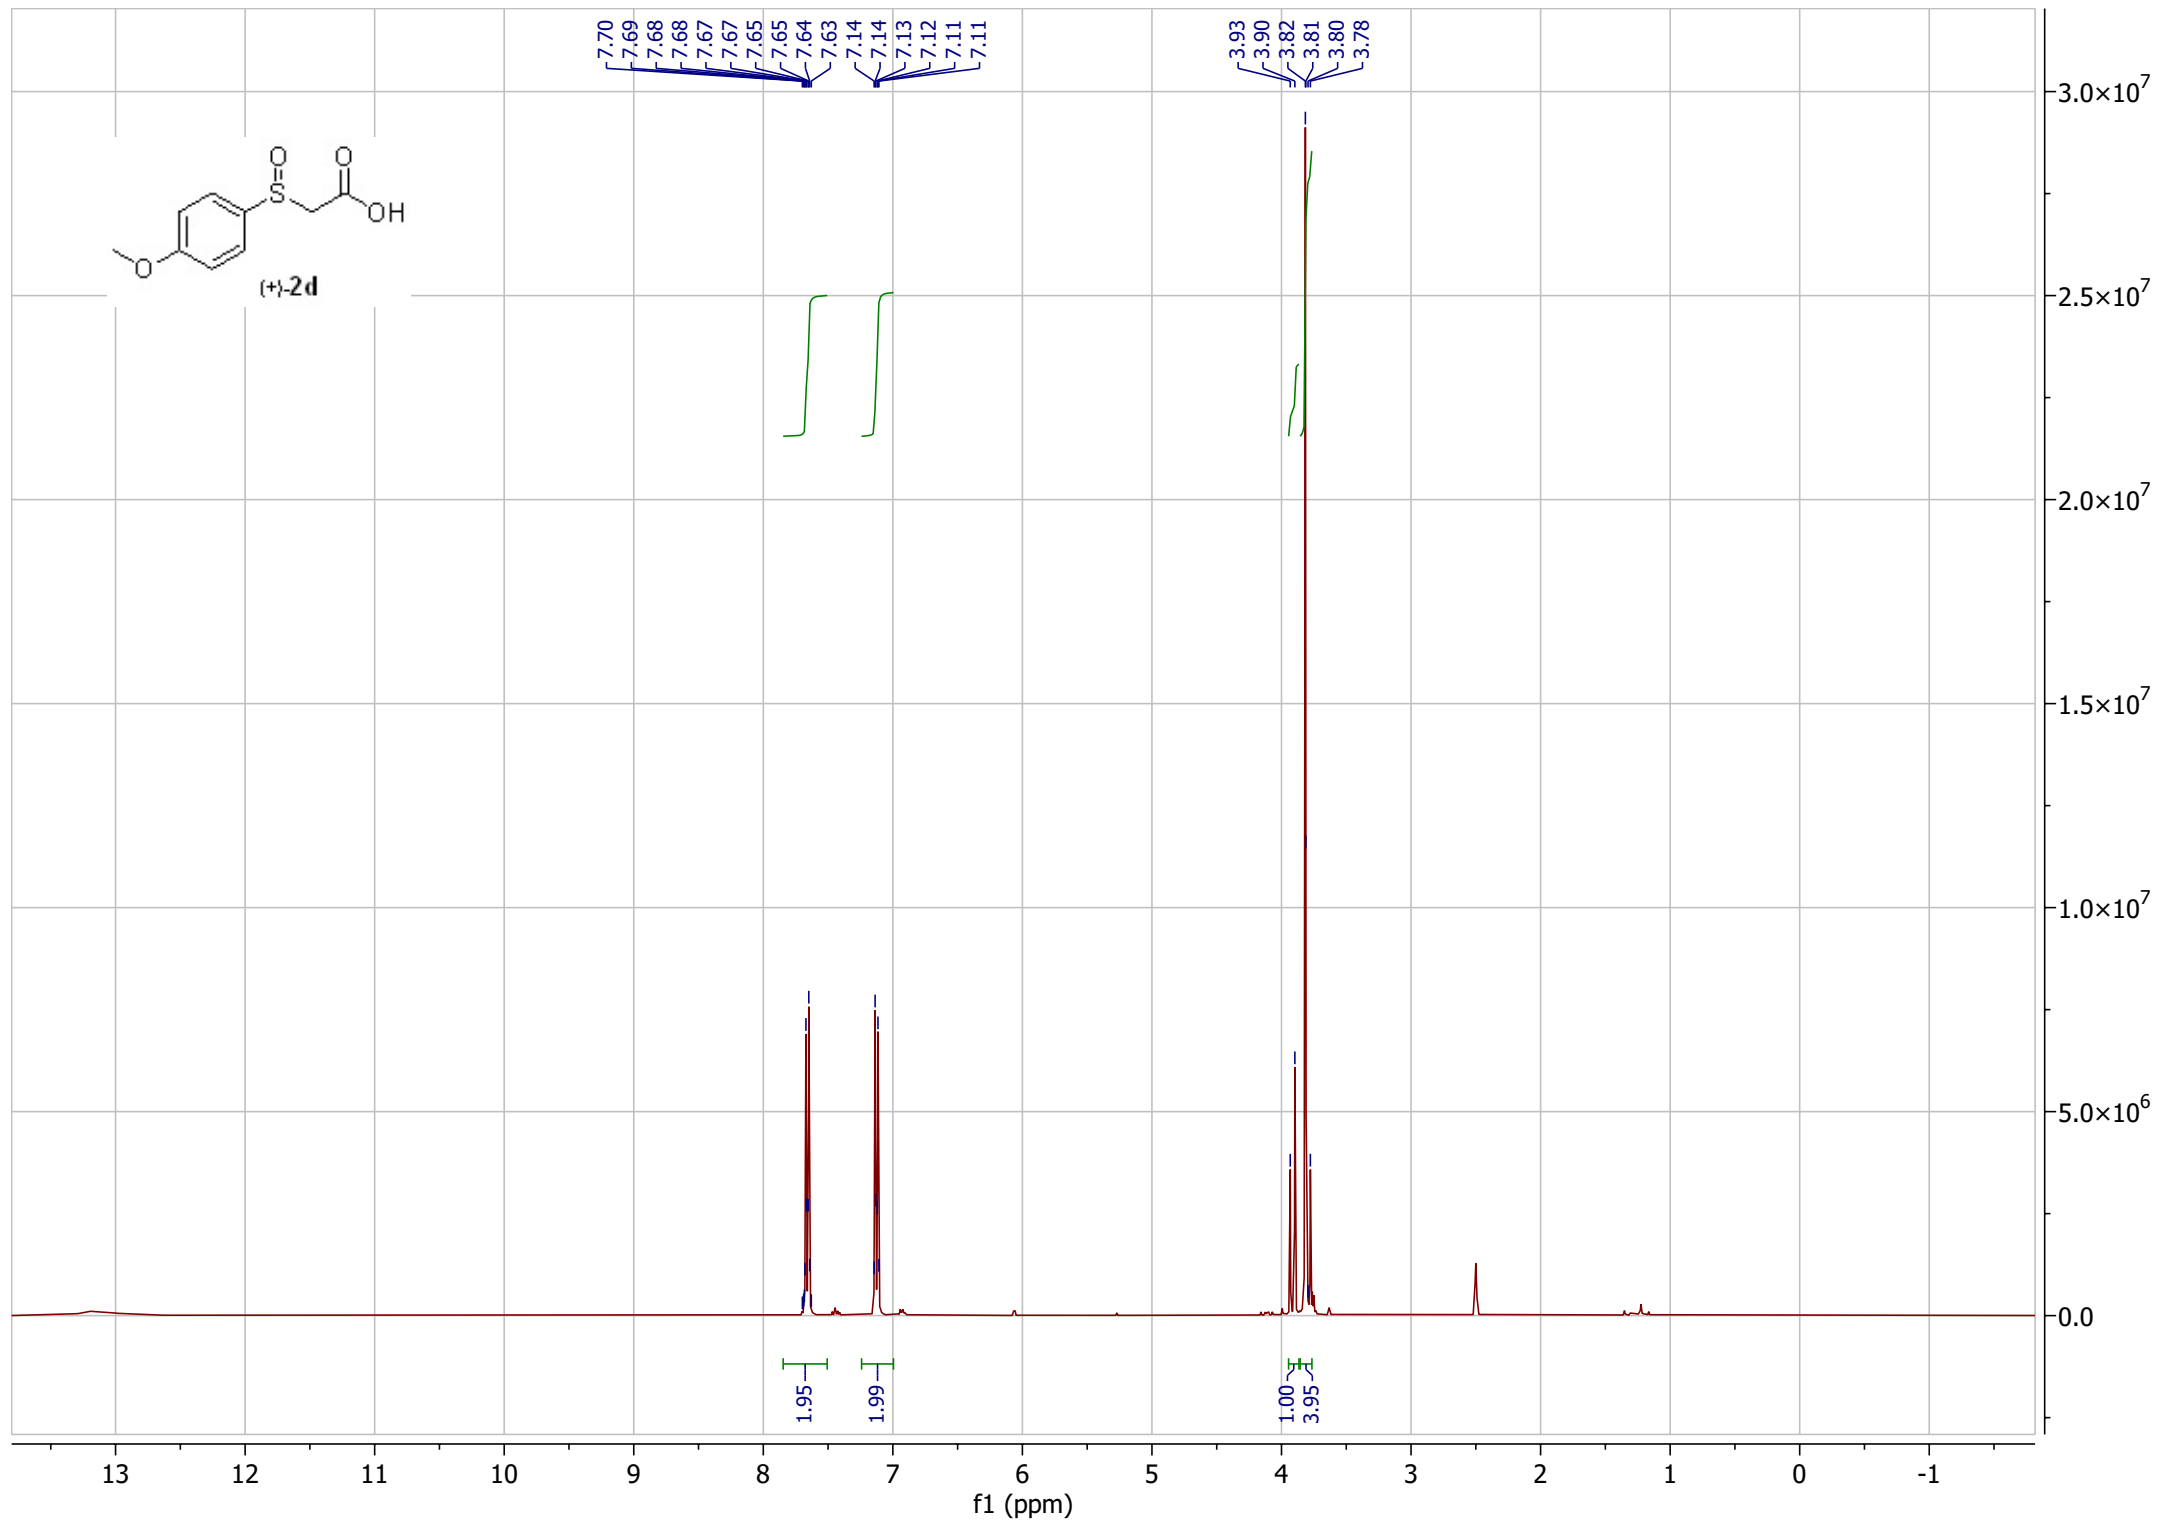

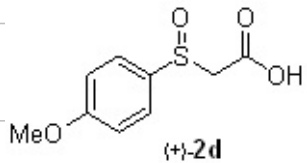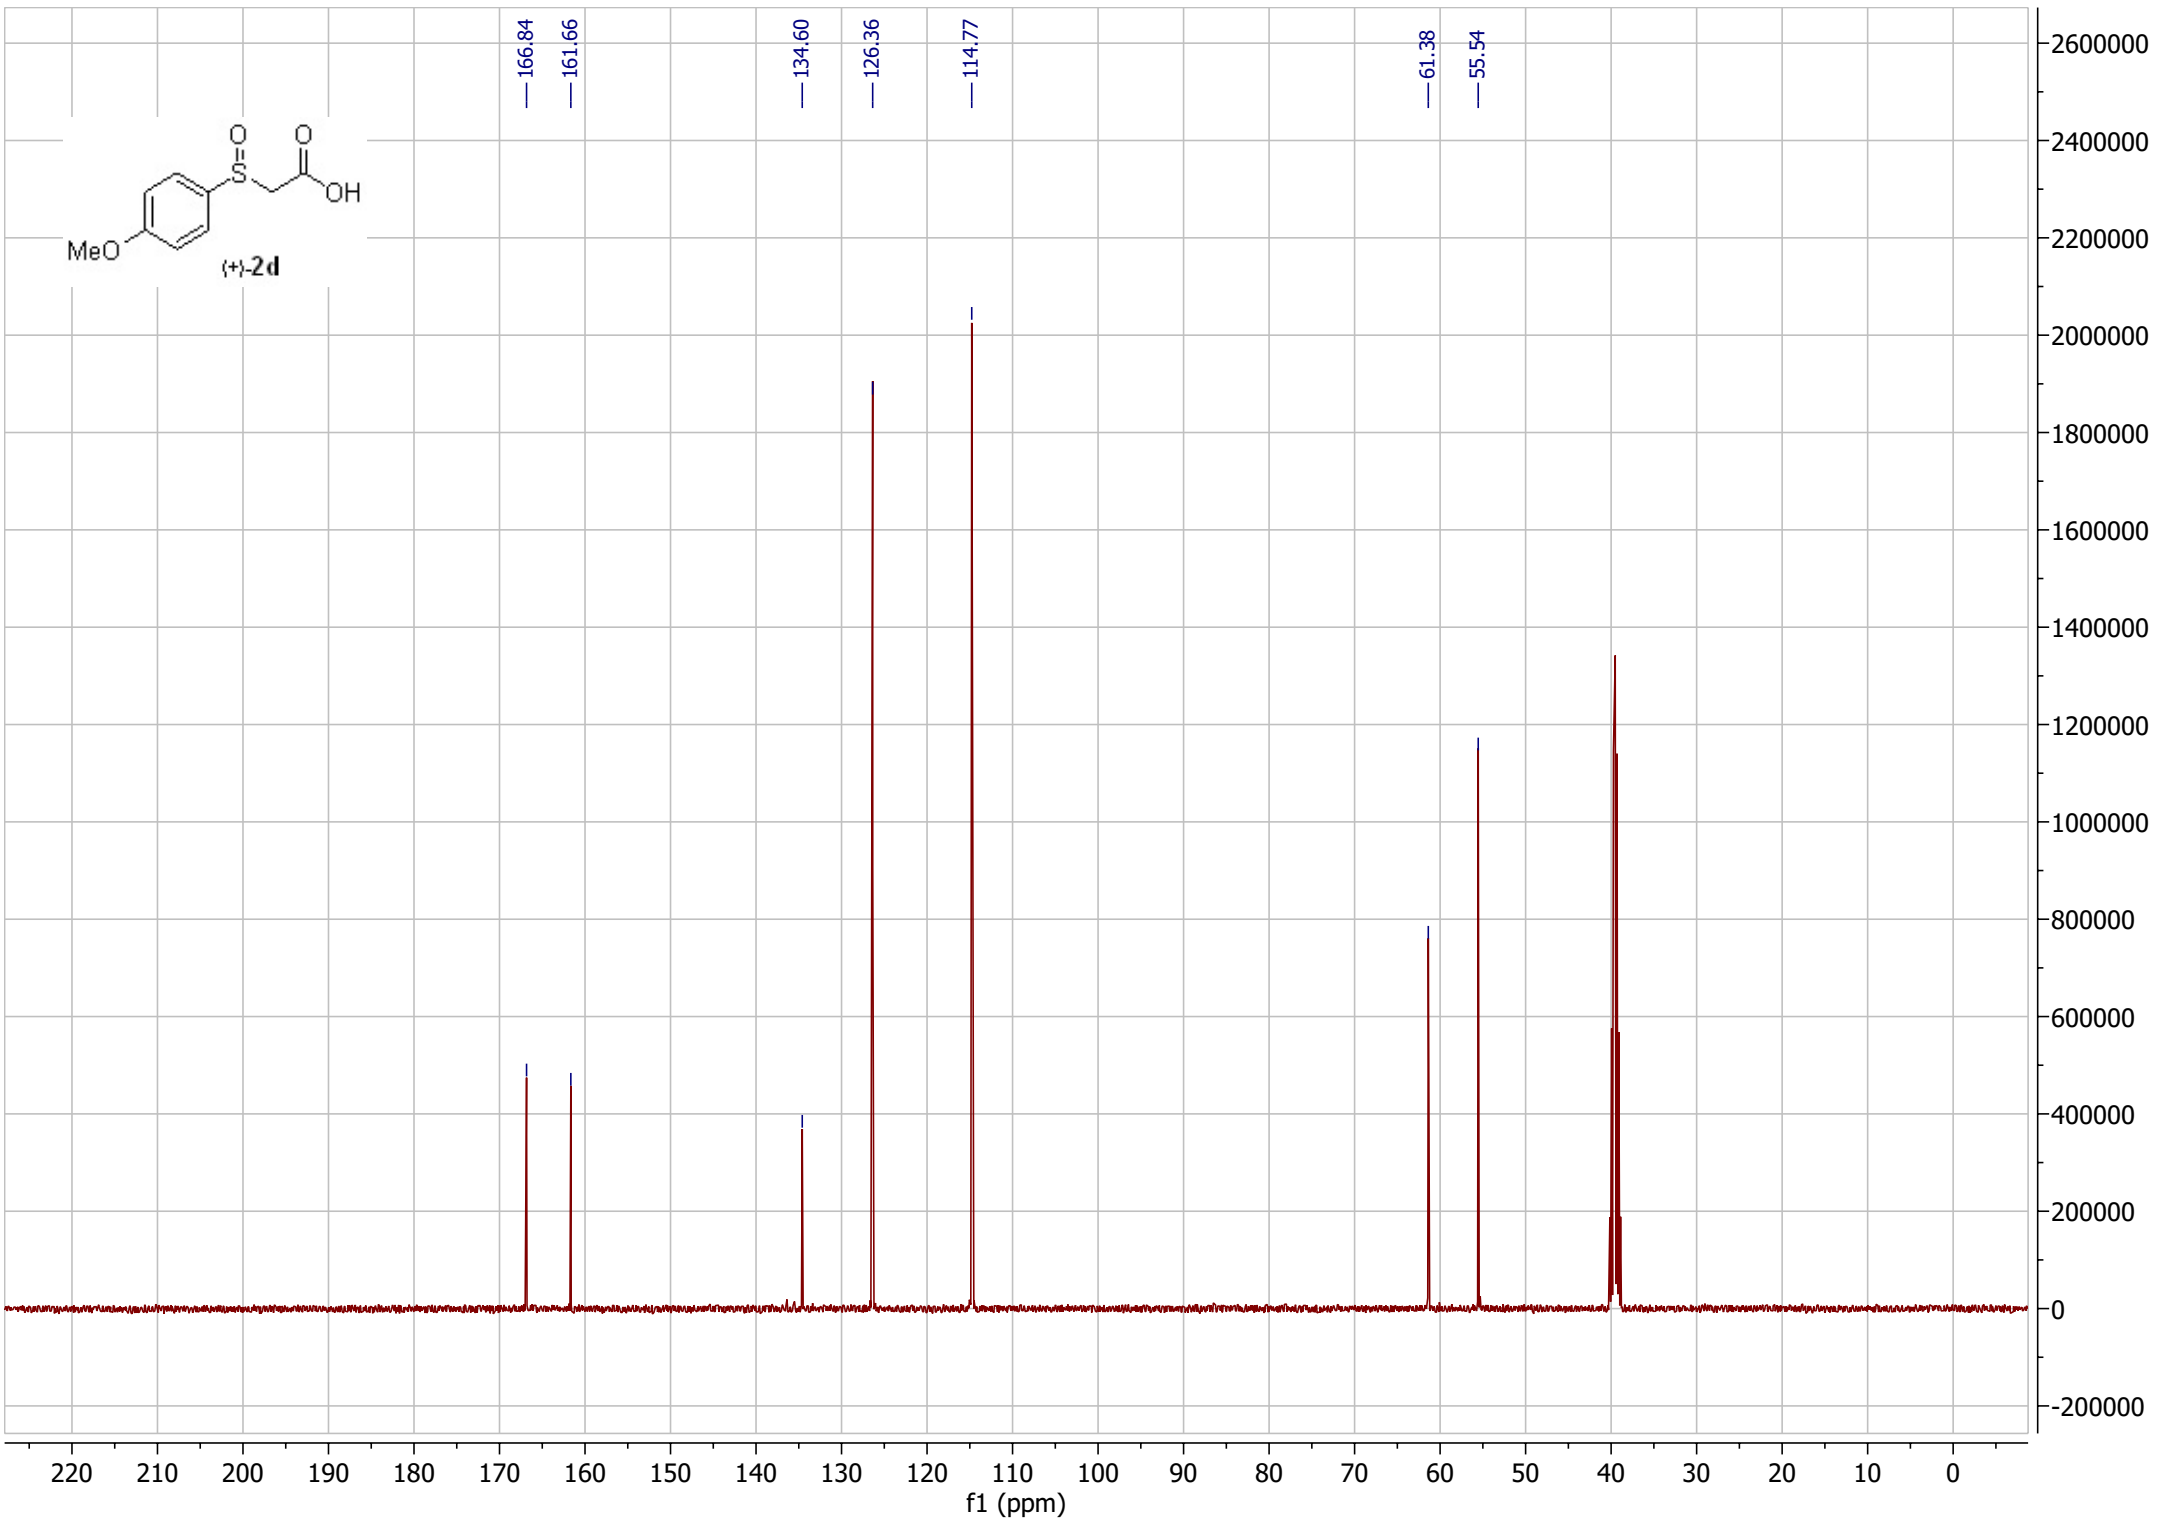

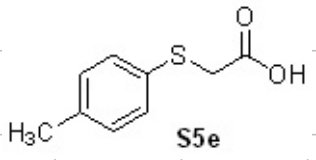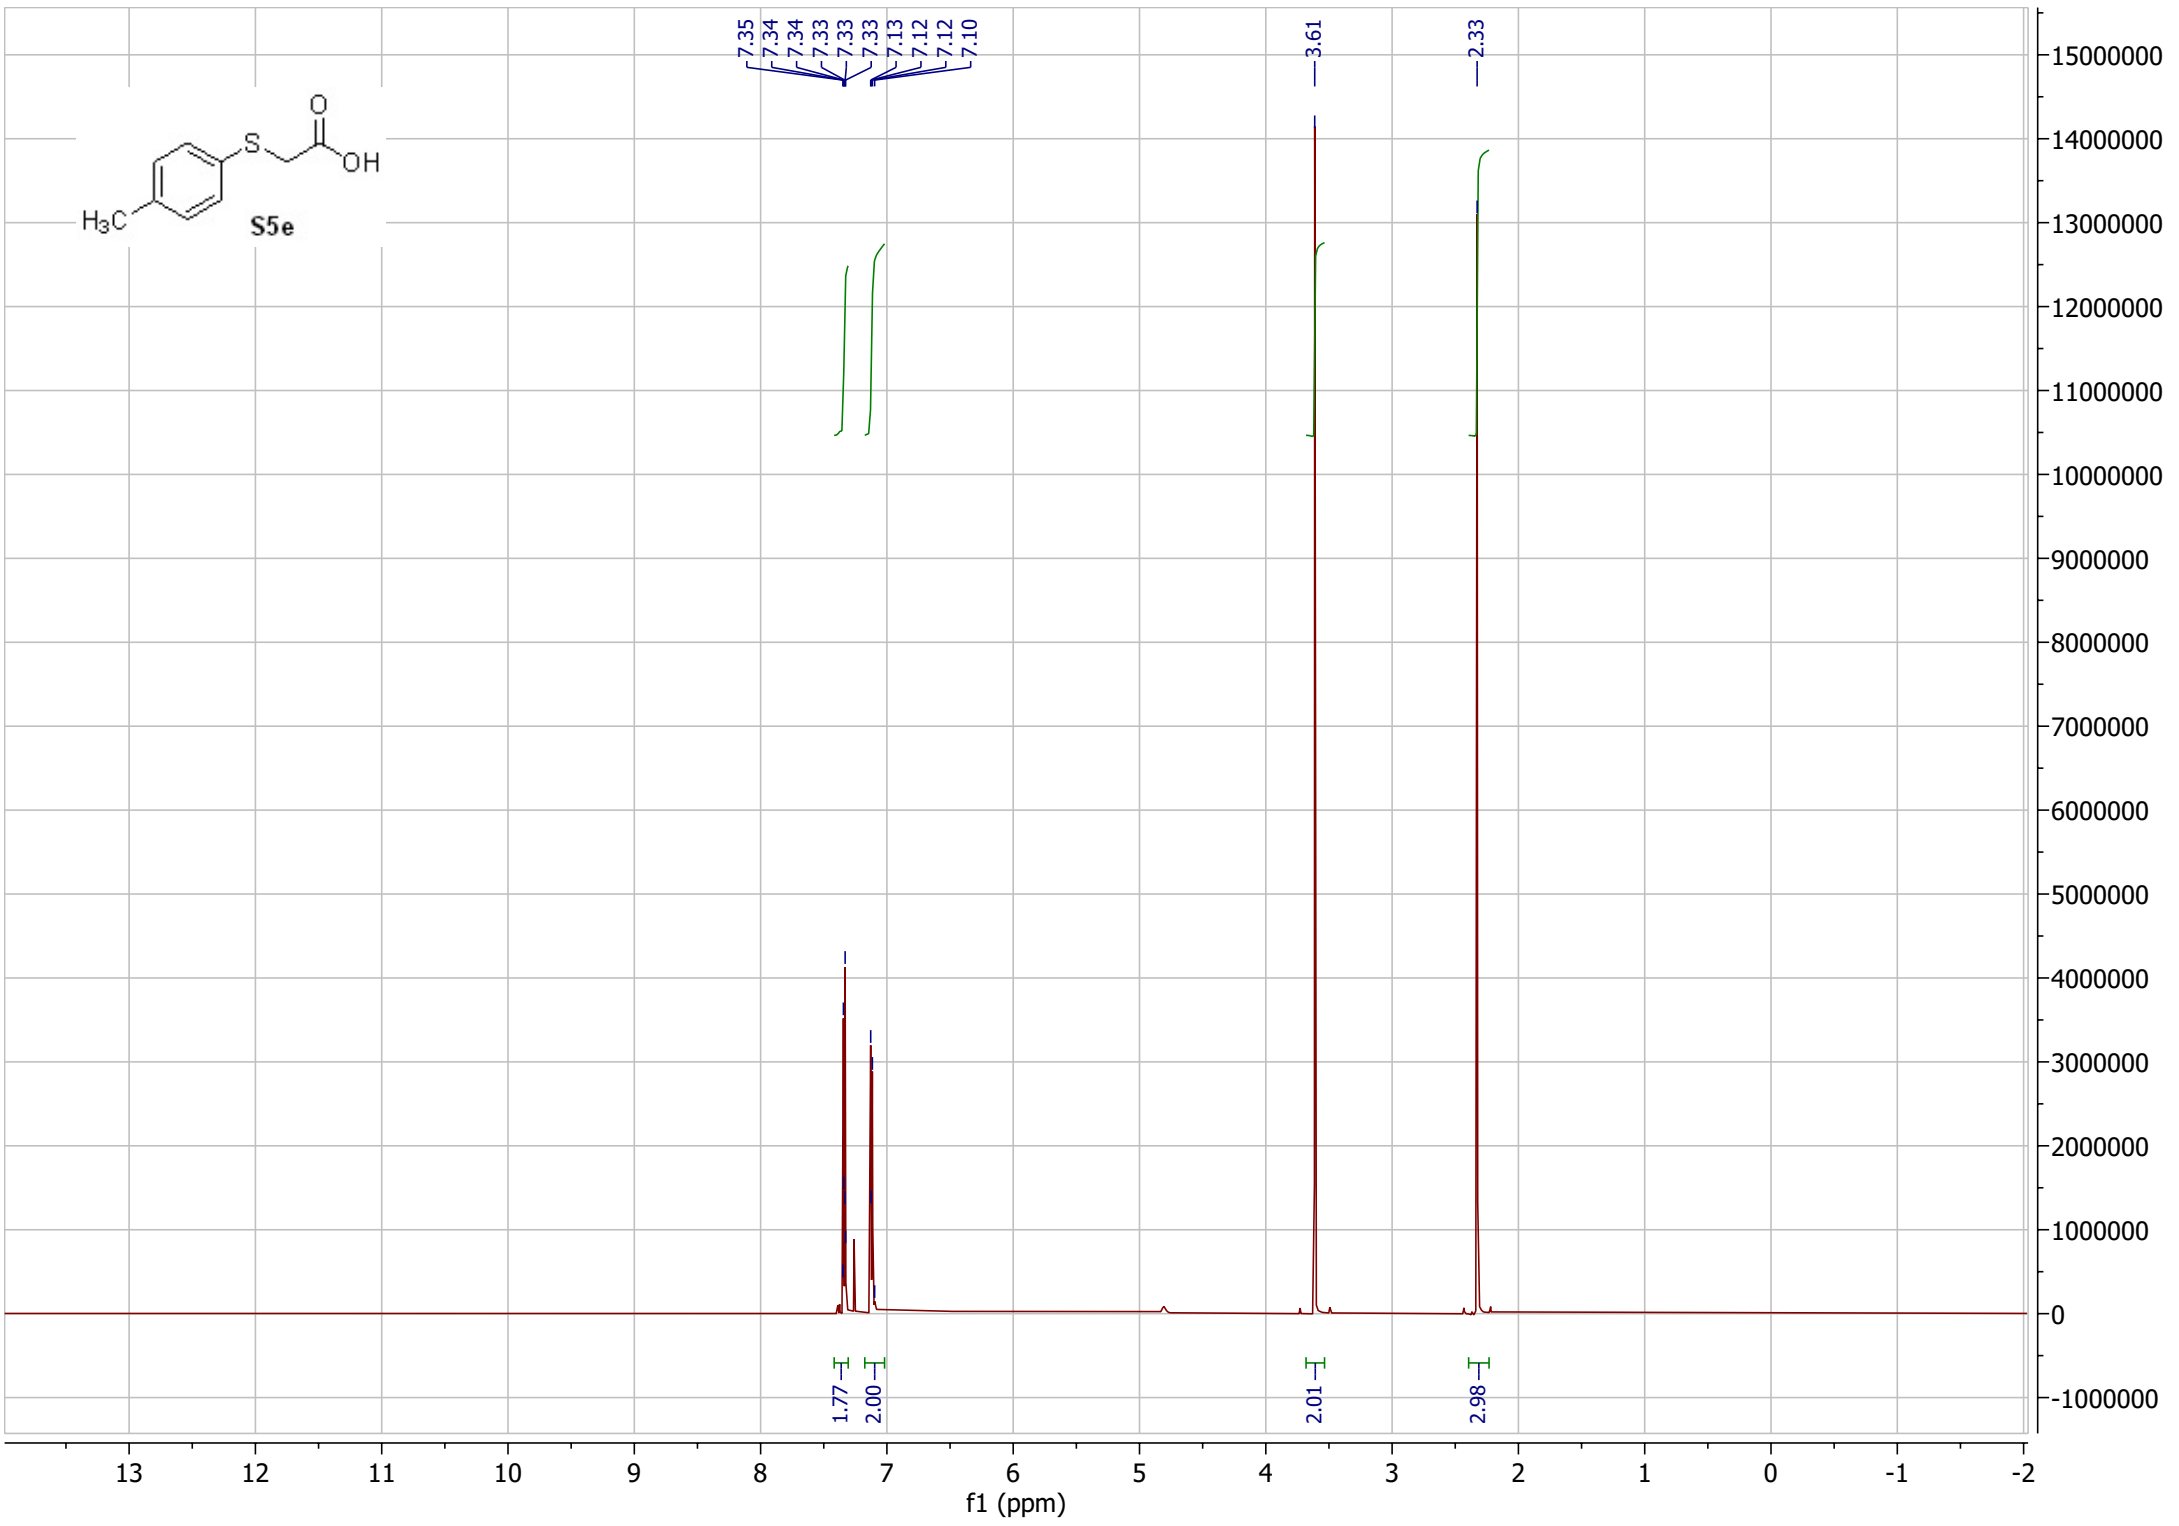

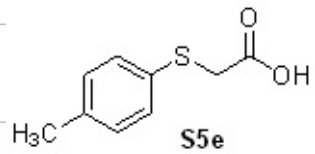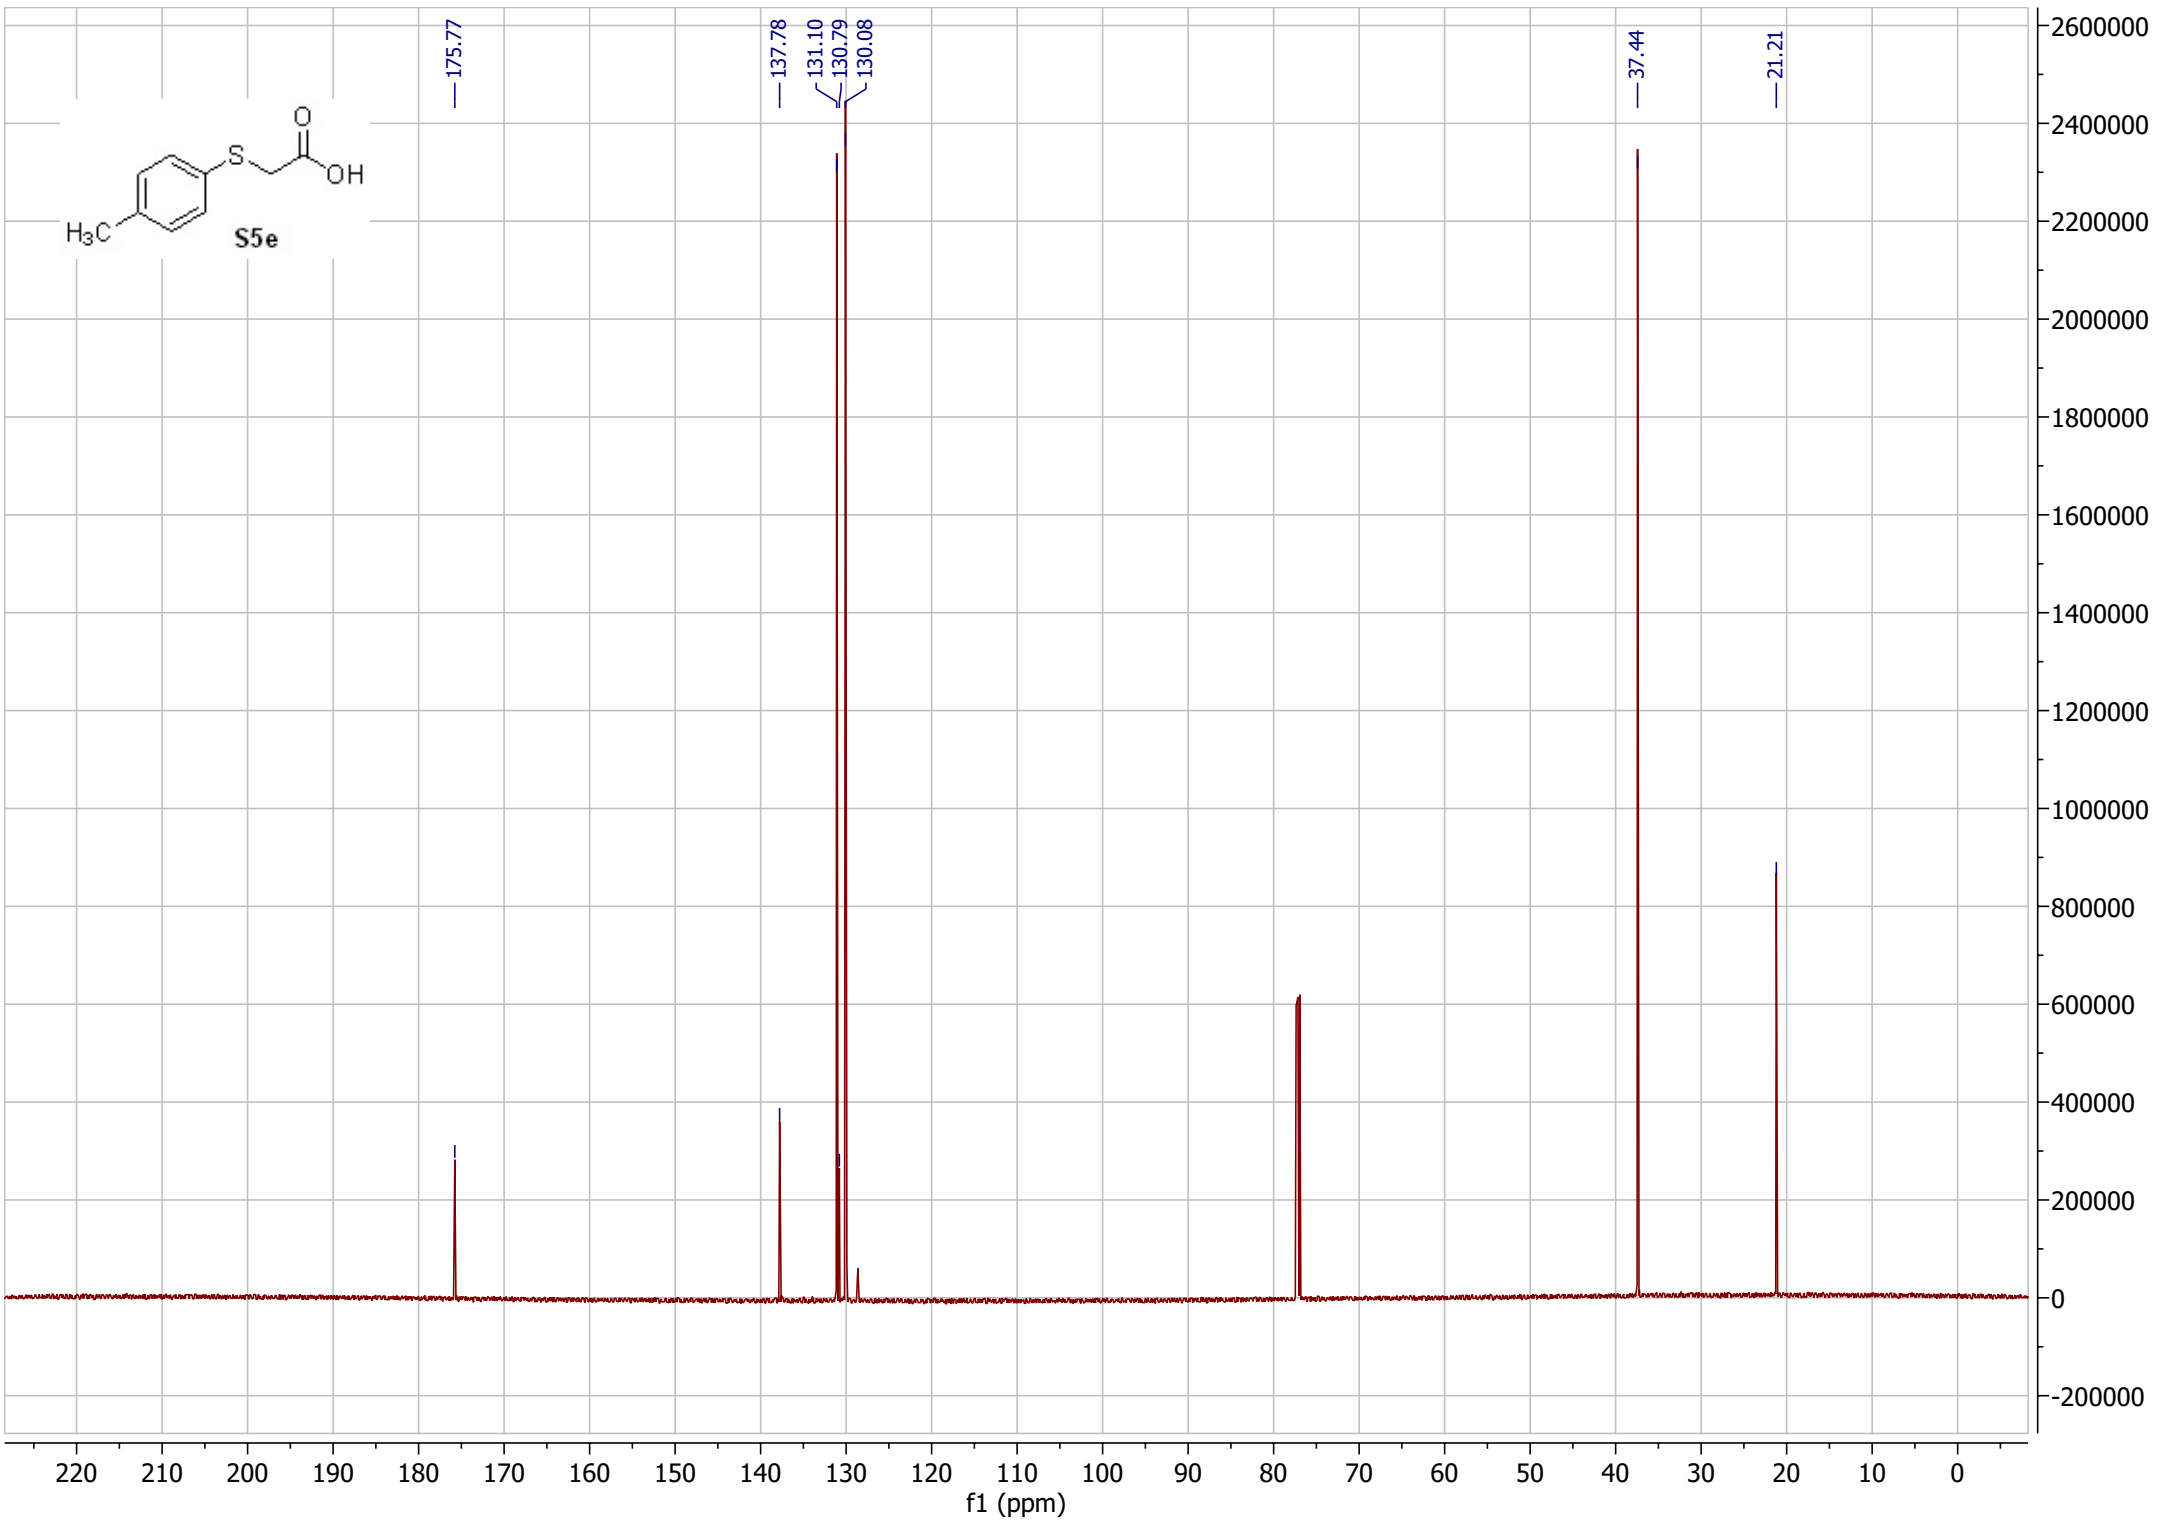

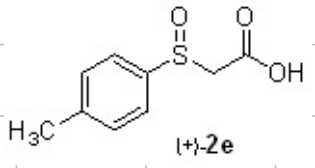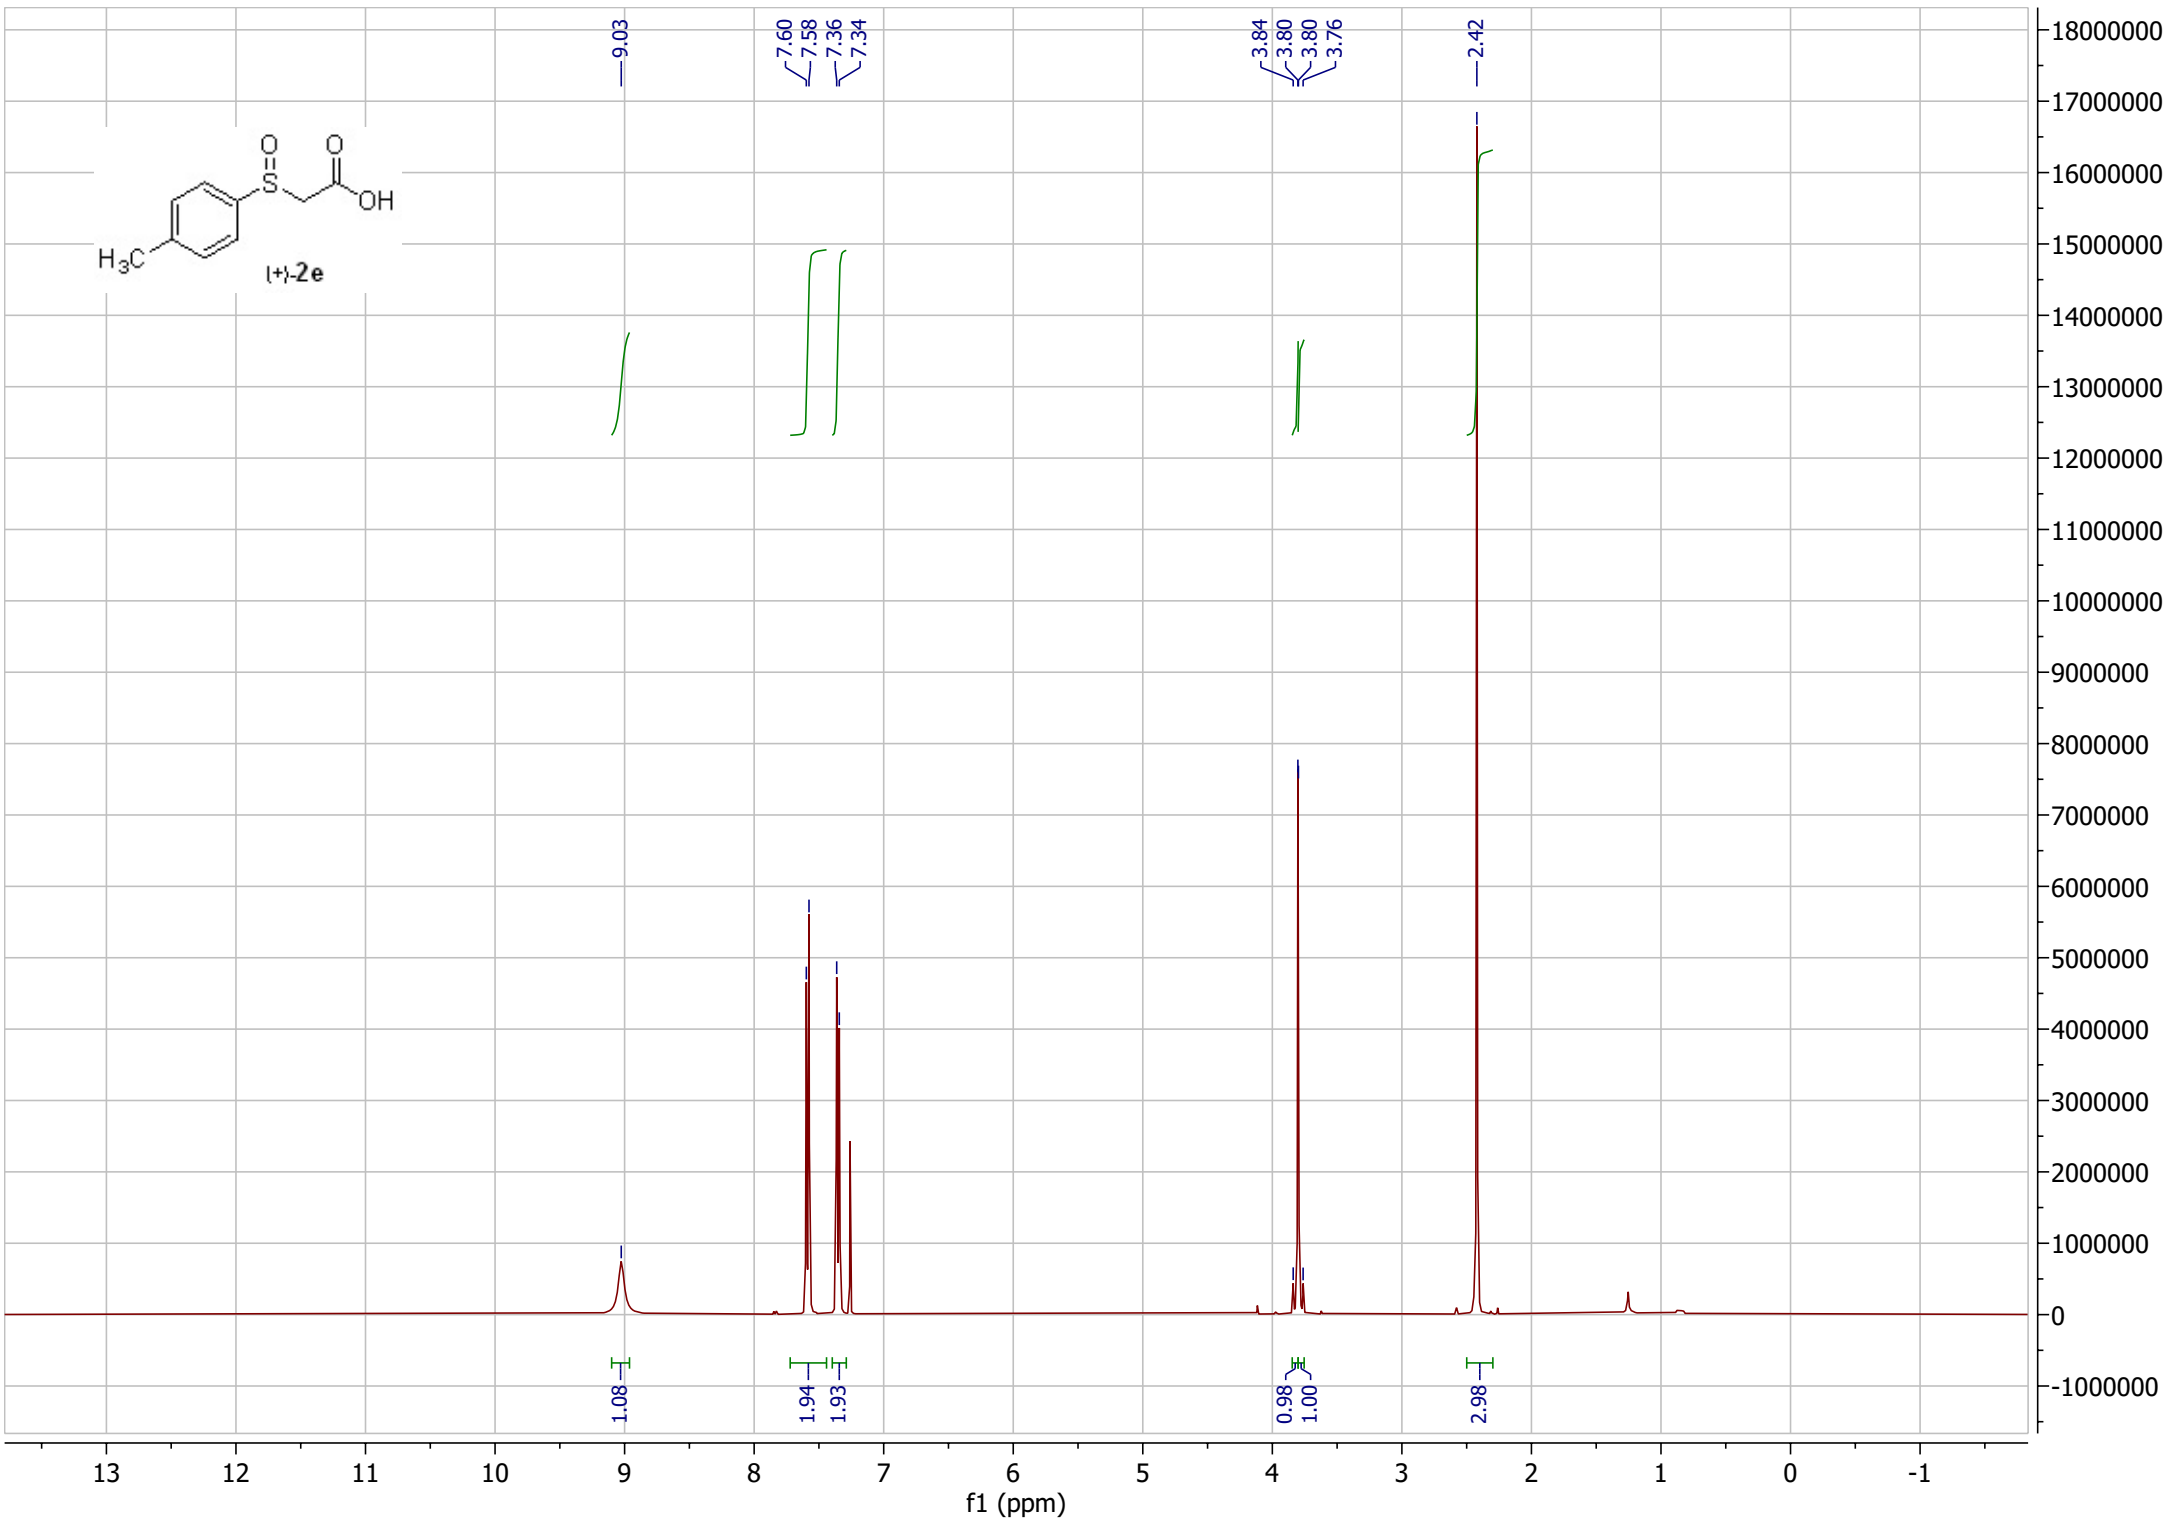

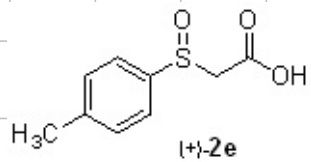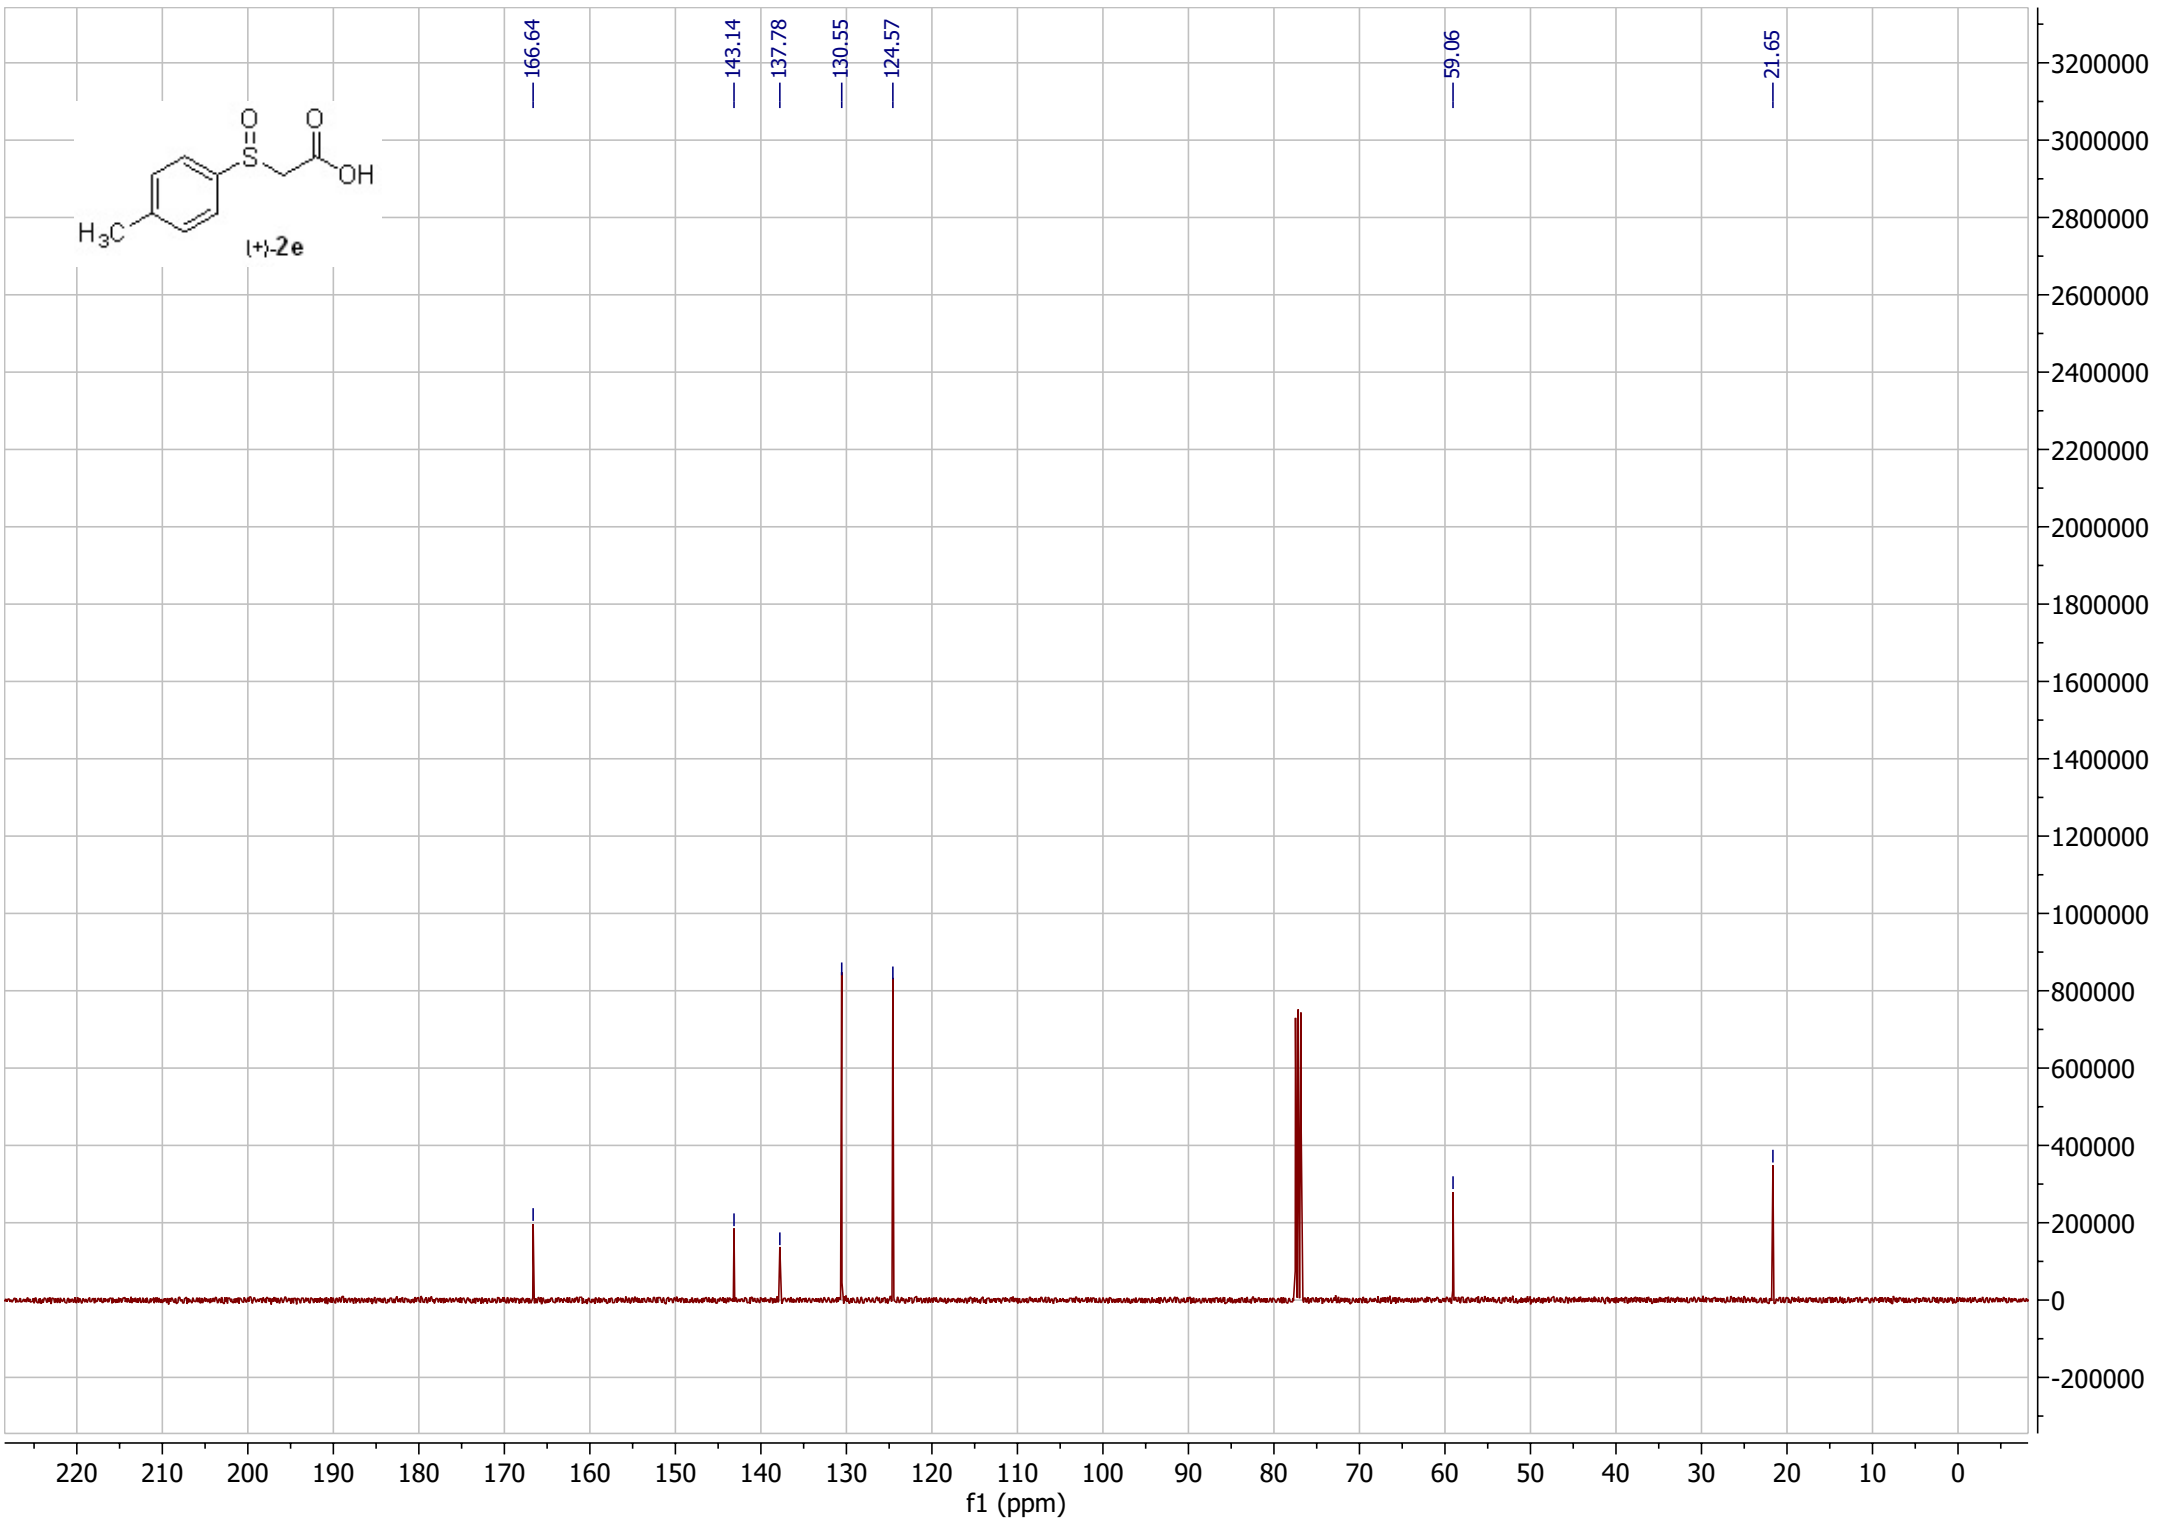



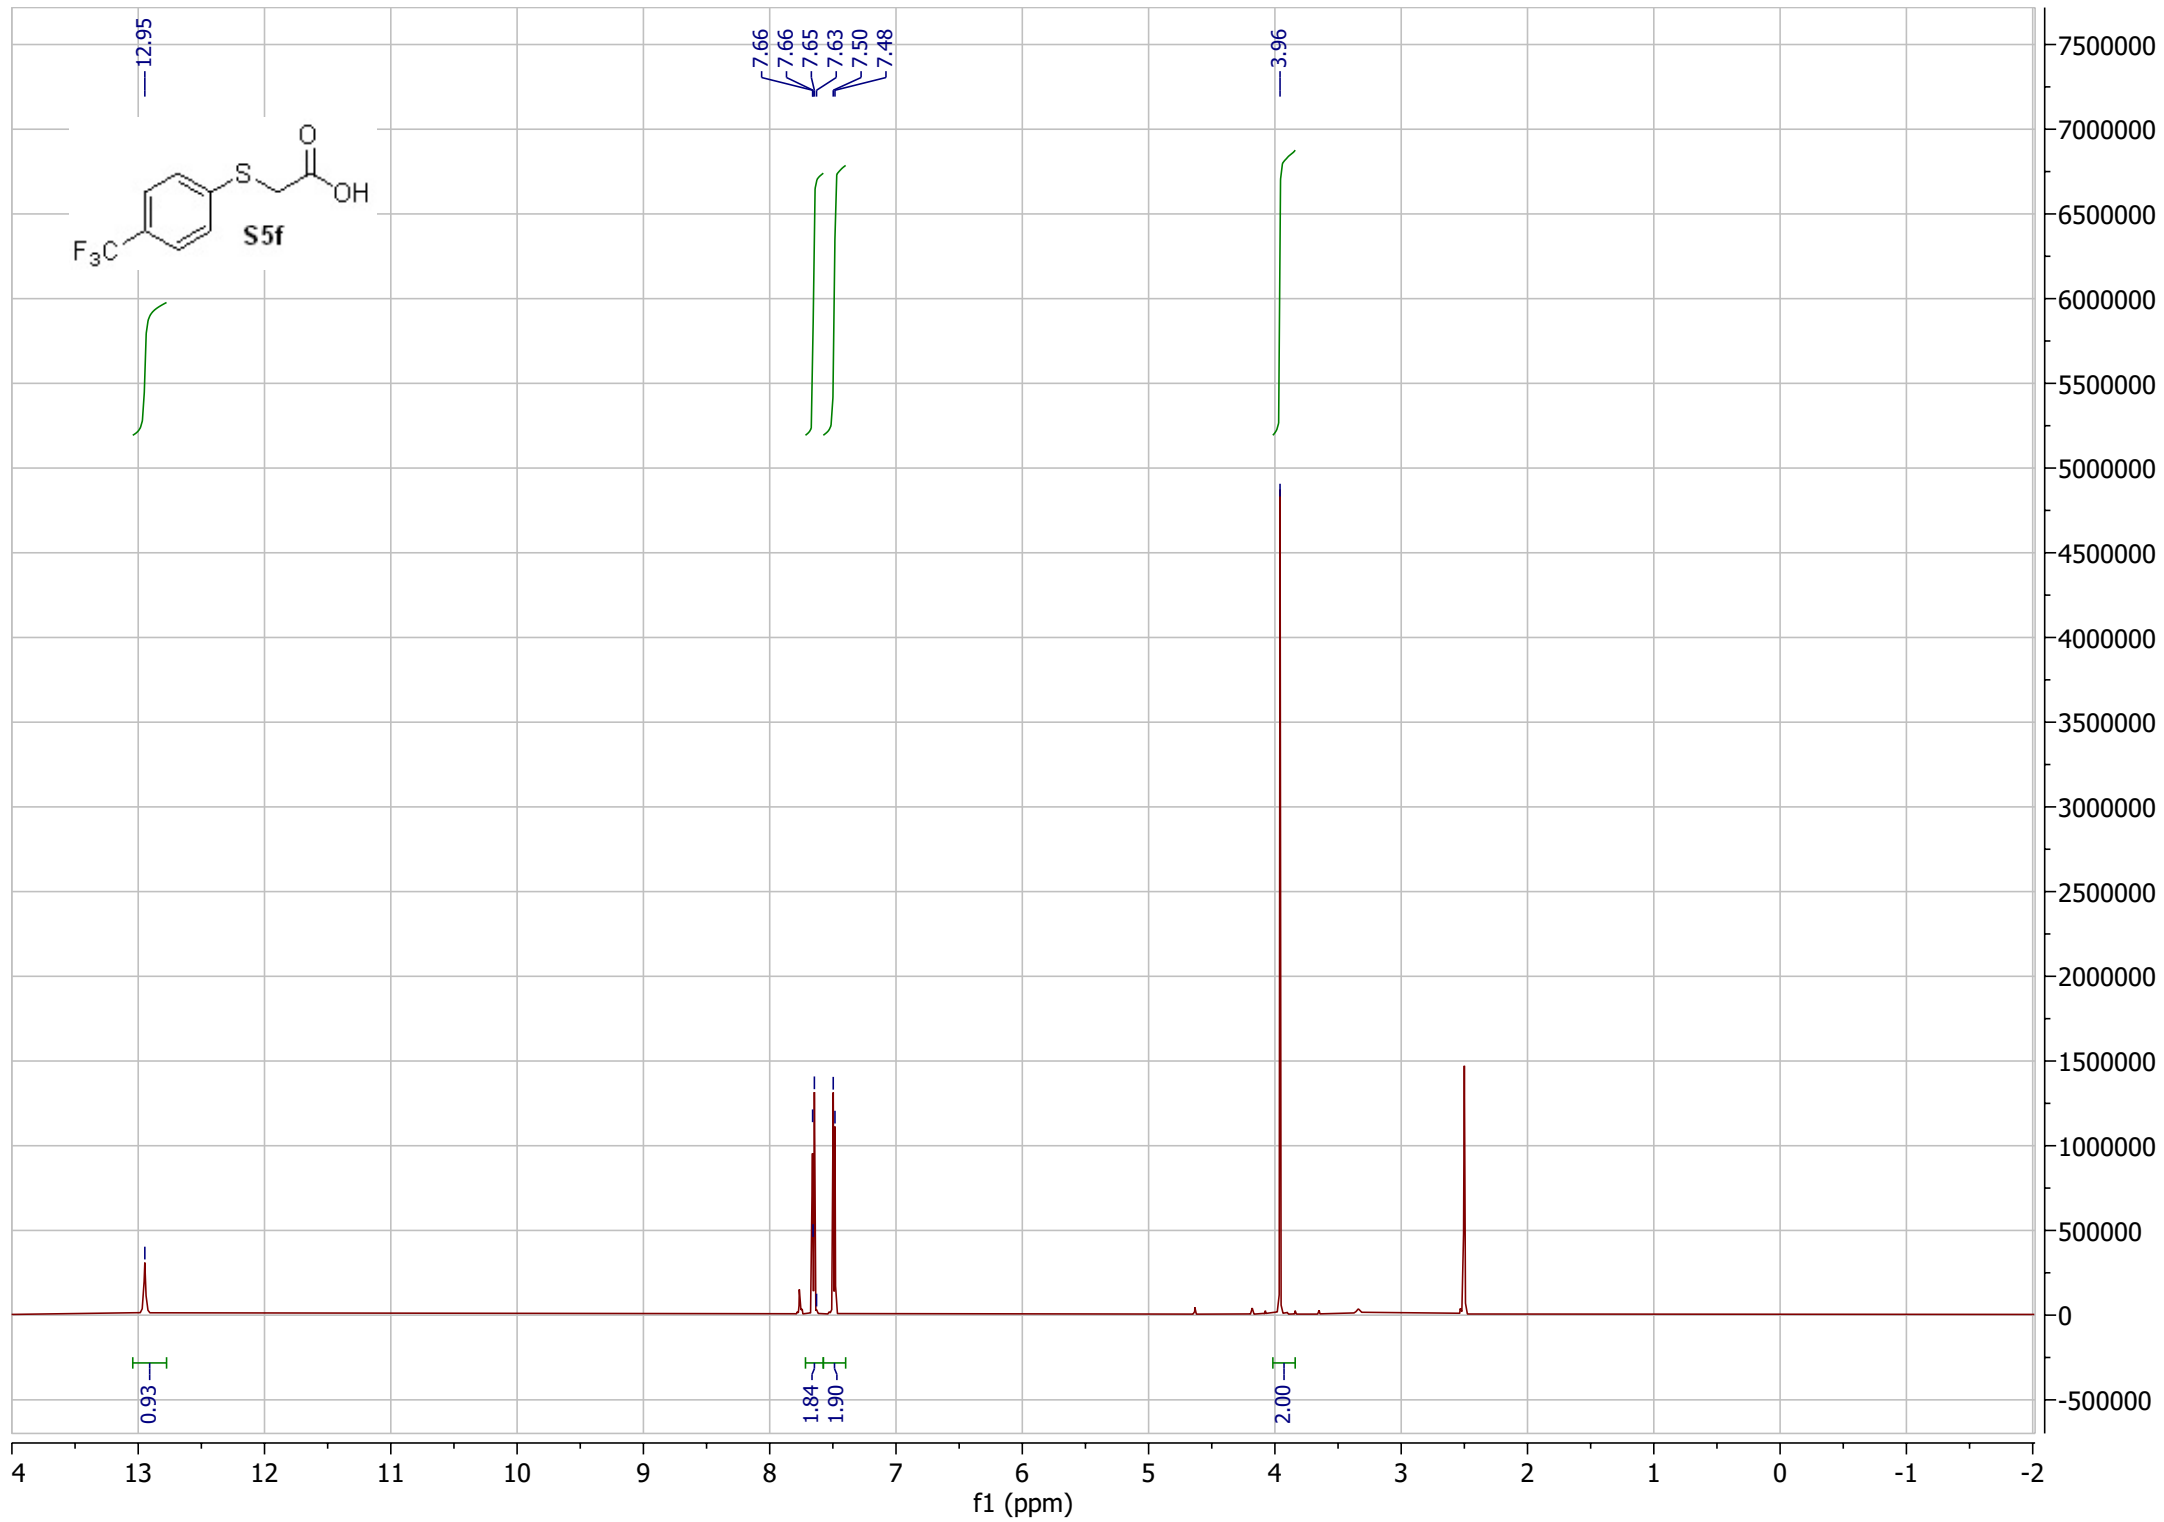

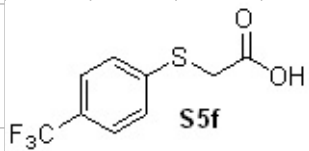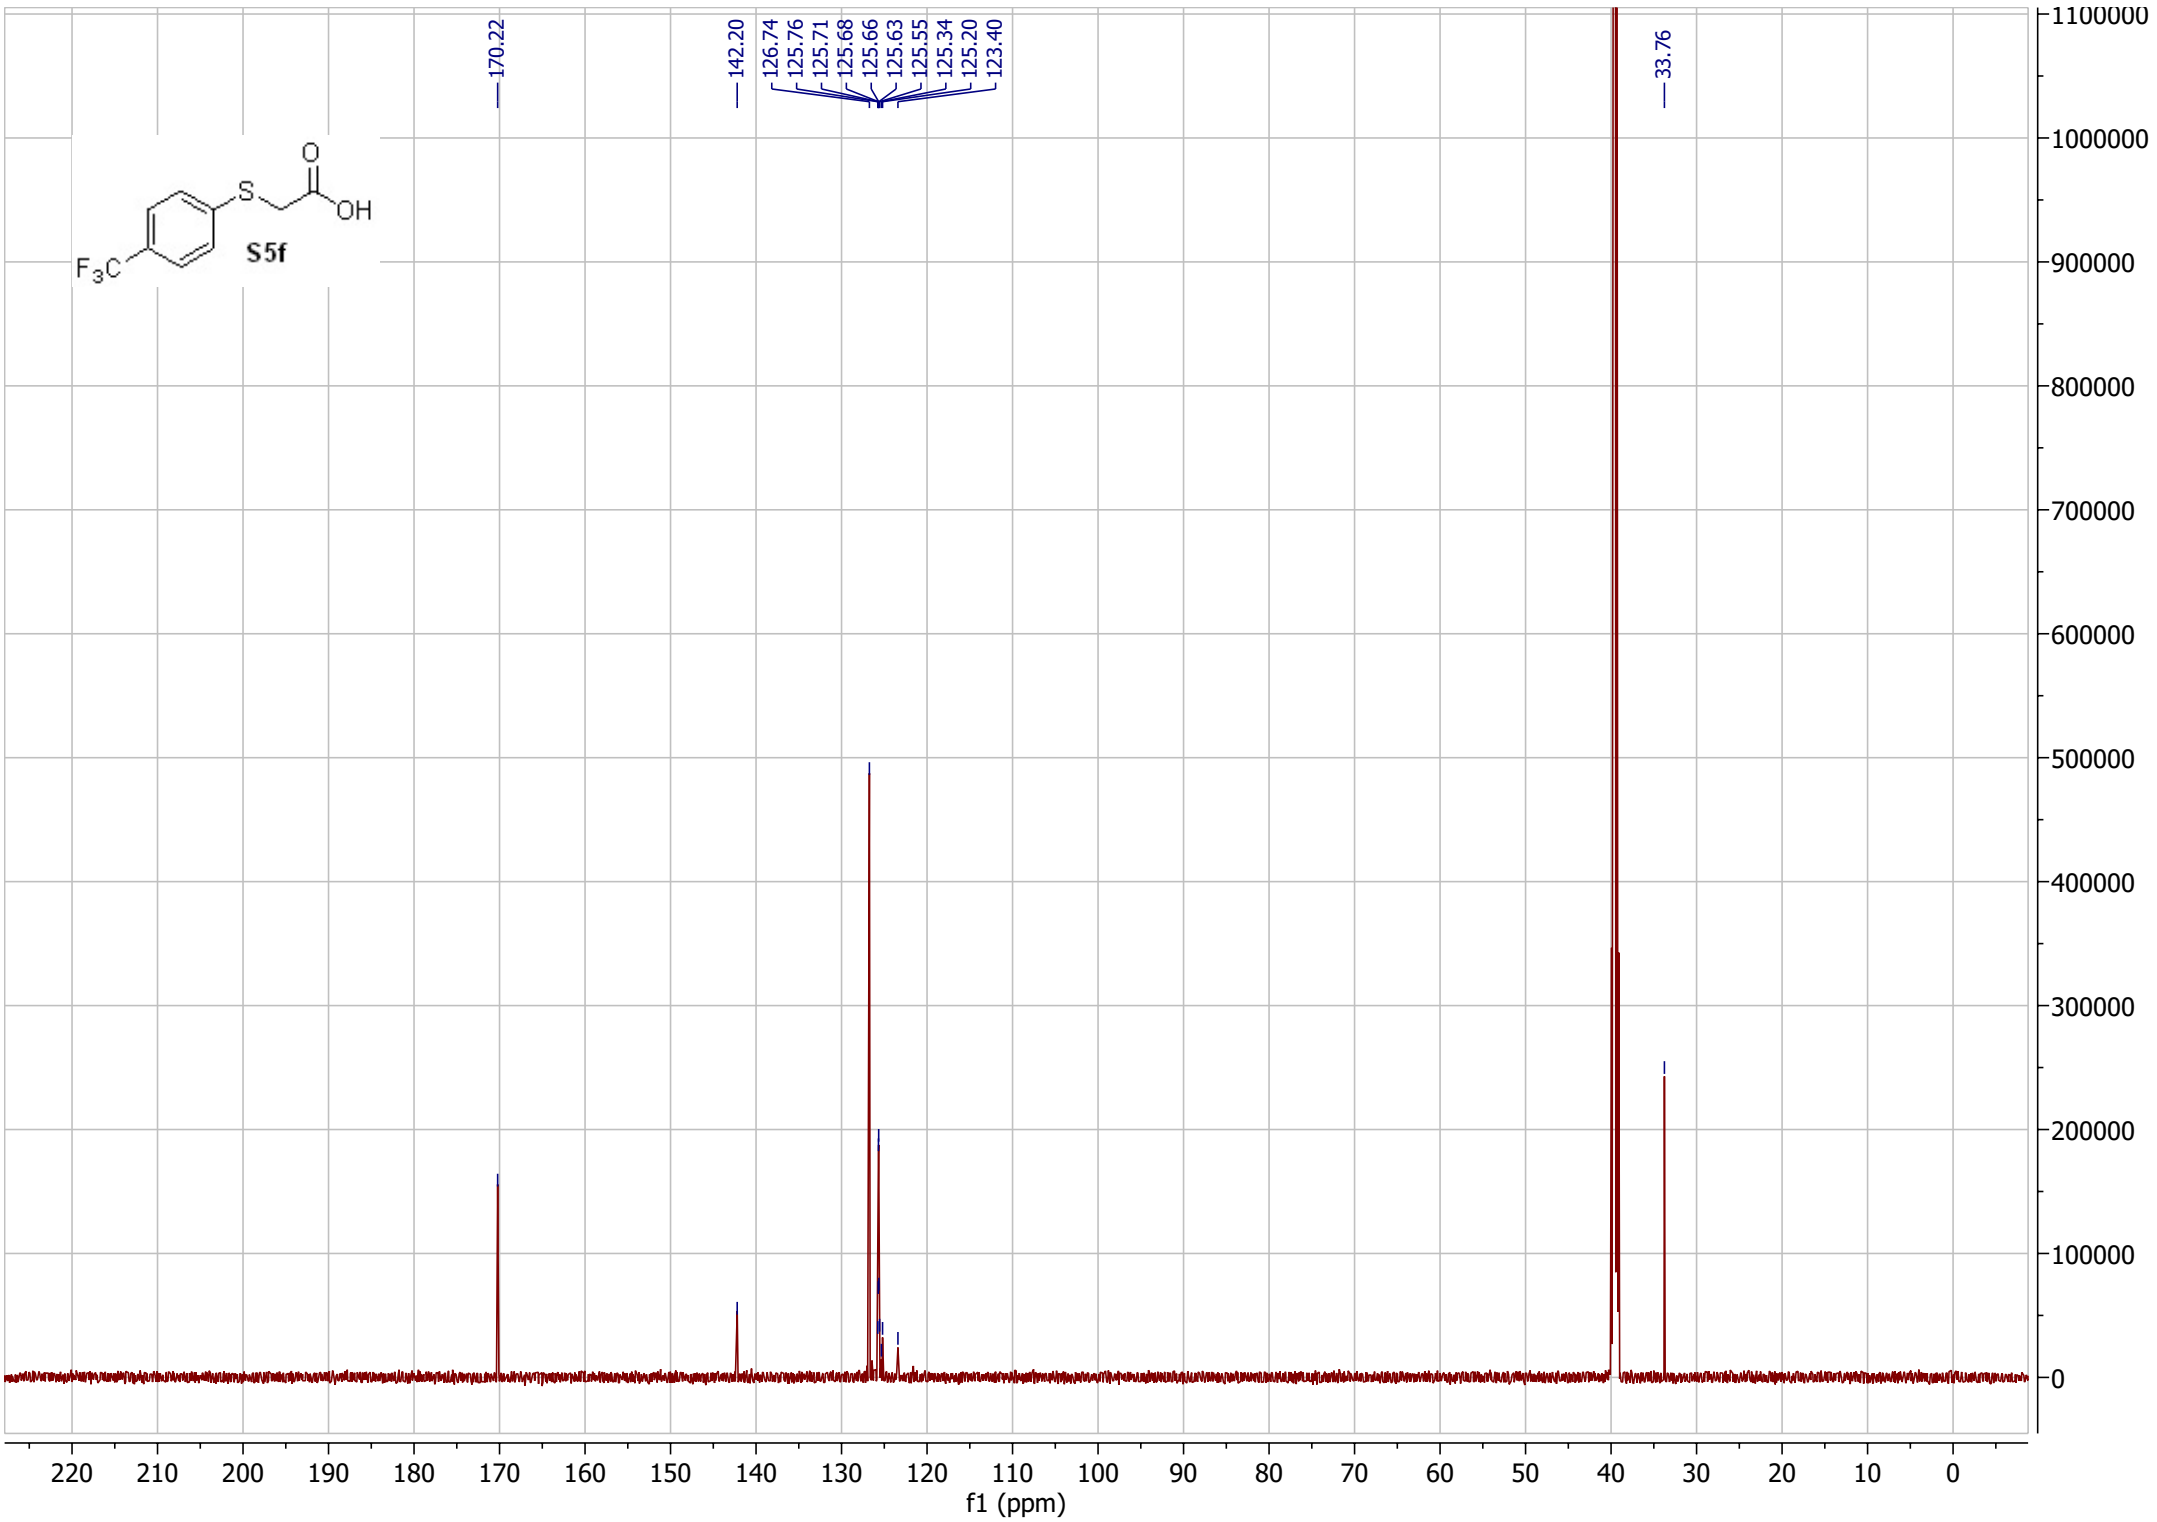

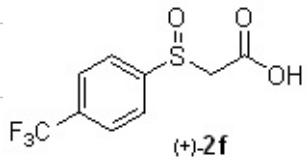

7.96  
7.94  
7.92  
7.90

4.06  
4.02  
3.92  
3.88

3.89

1.09  
1.00

13 12 11 10 9 8 7 6 5 4 3 2 1 0 -1

f1 (ppm)

17000000  
16000000  
15000000  
14000000  
13000000  
12000000  
11000000  
10000000  
9000000  
8000000  
7000000  
6000000  
5000000  
4000000  
3000000  
2000000  
1000000  
0  
-1000000

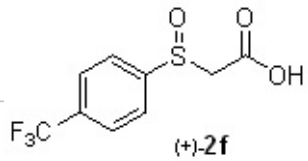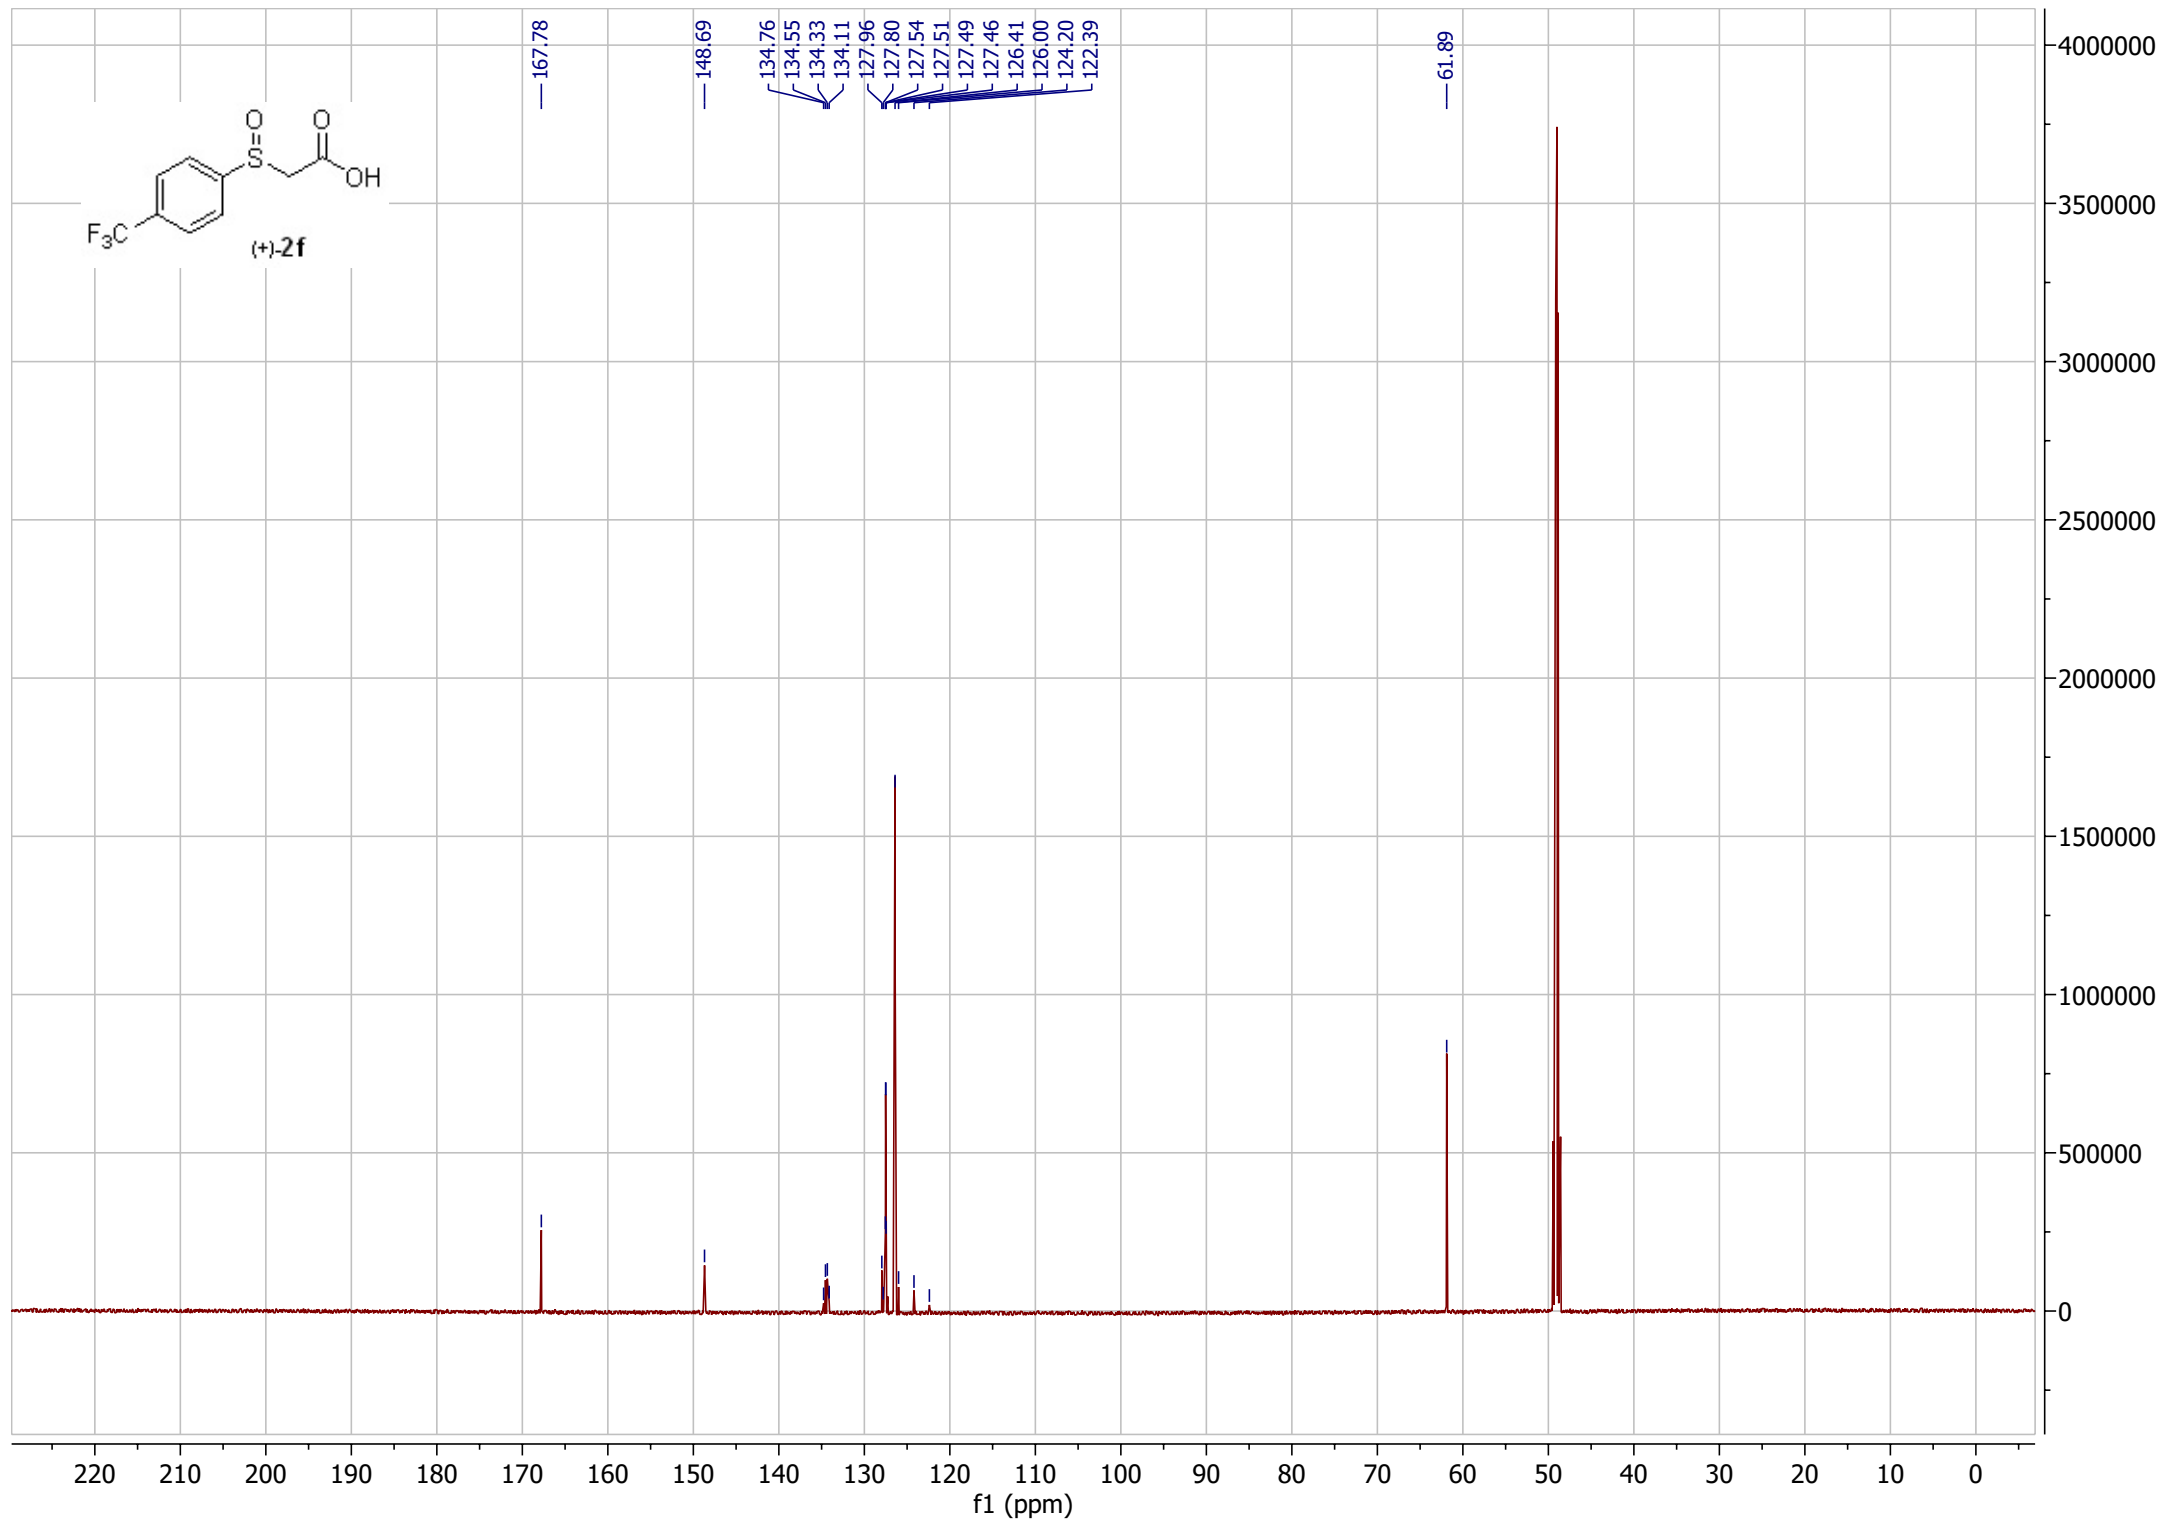

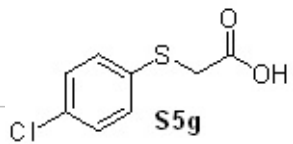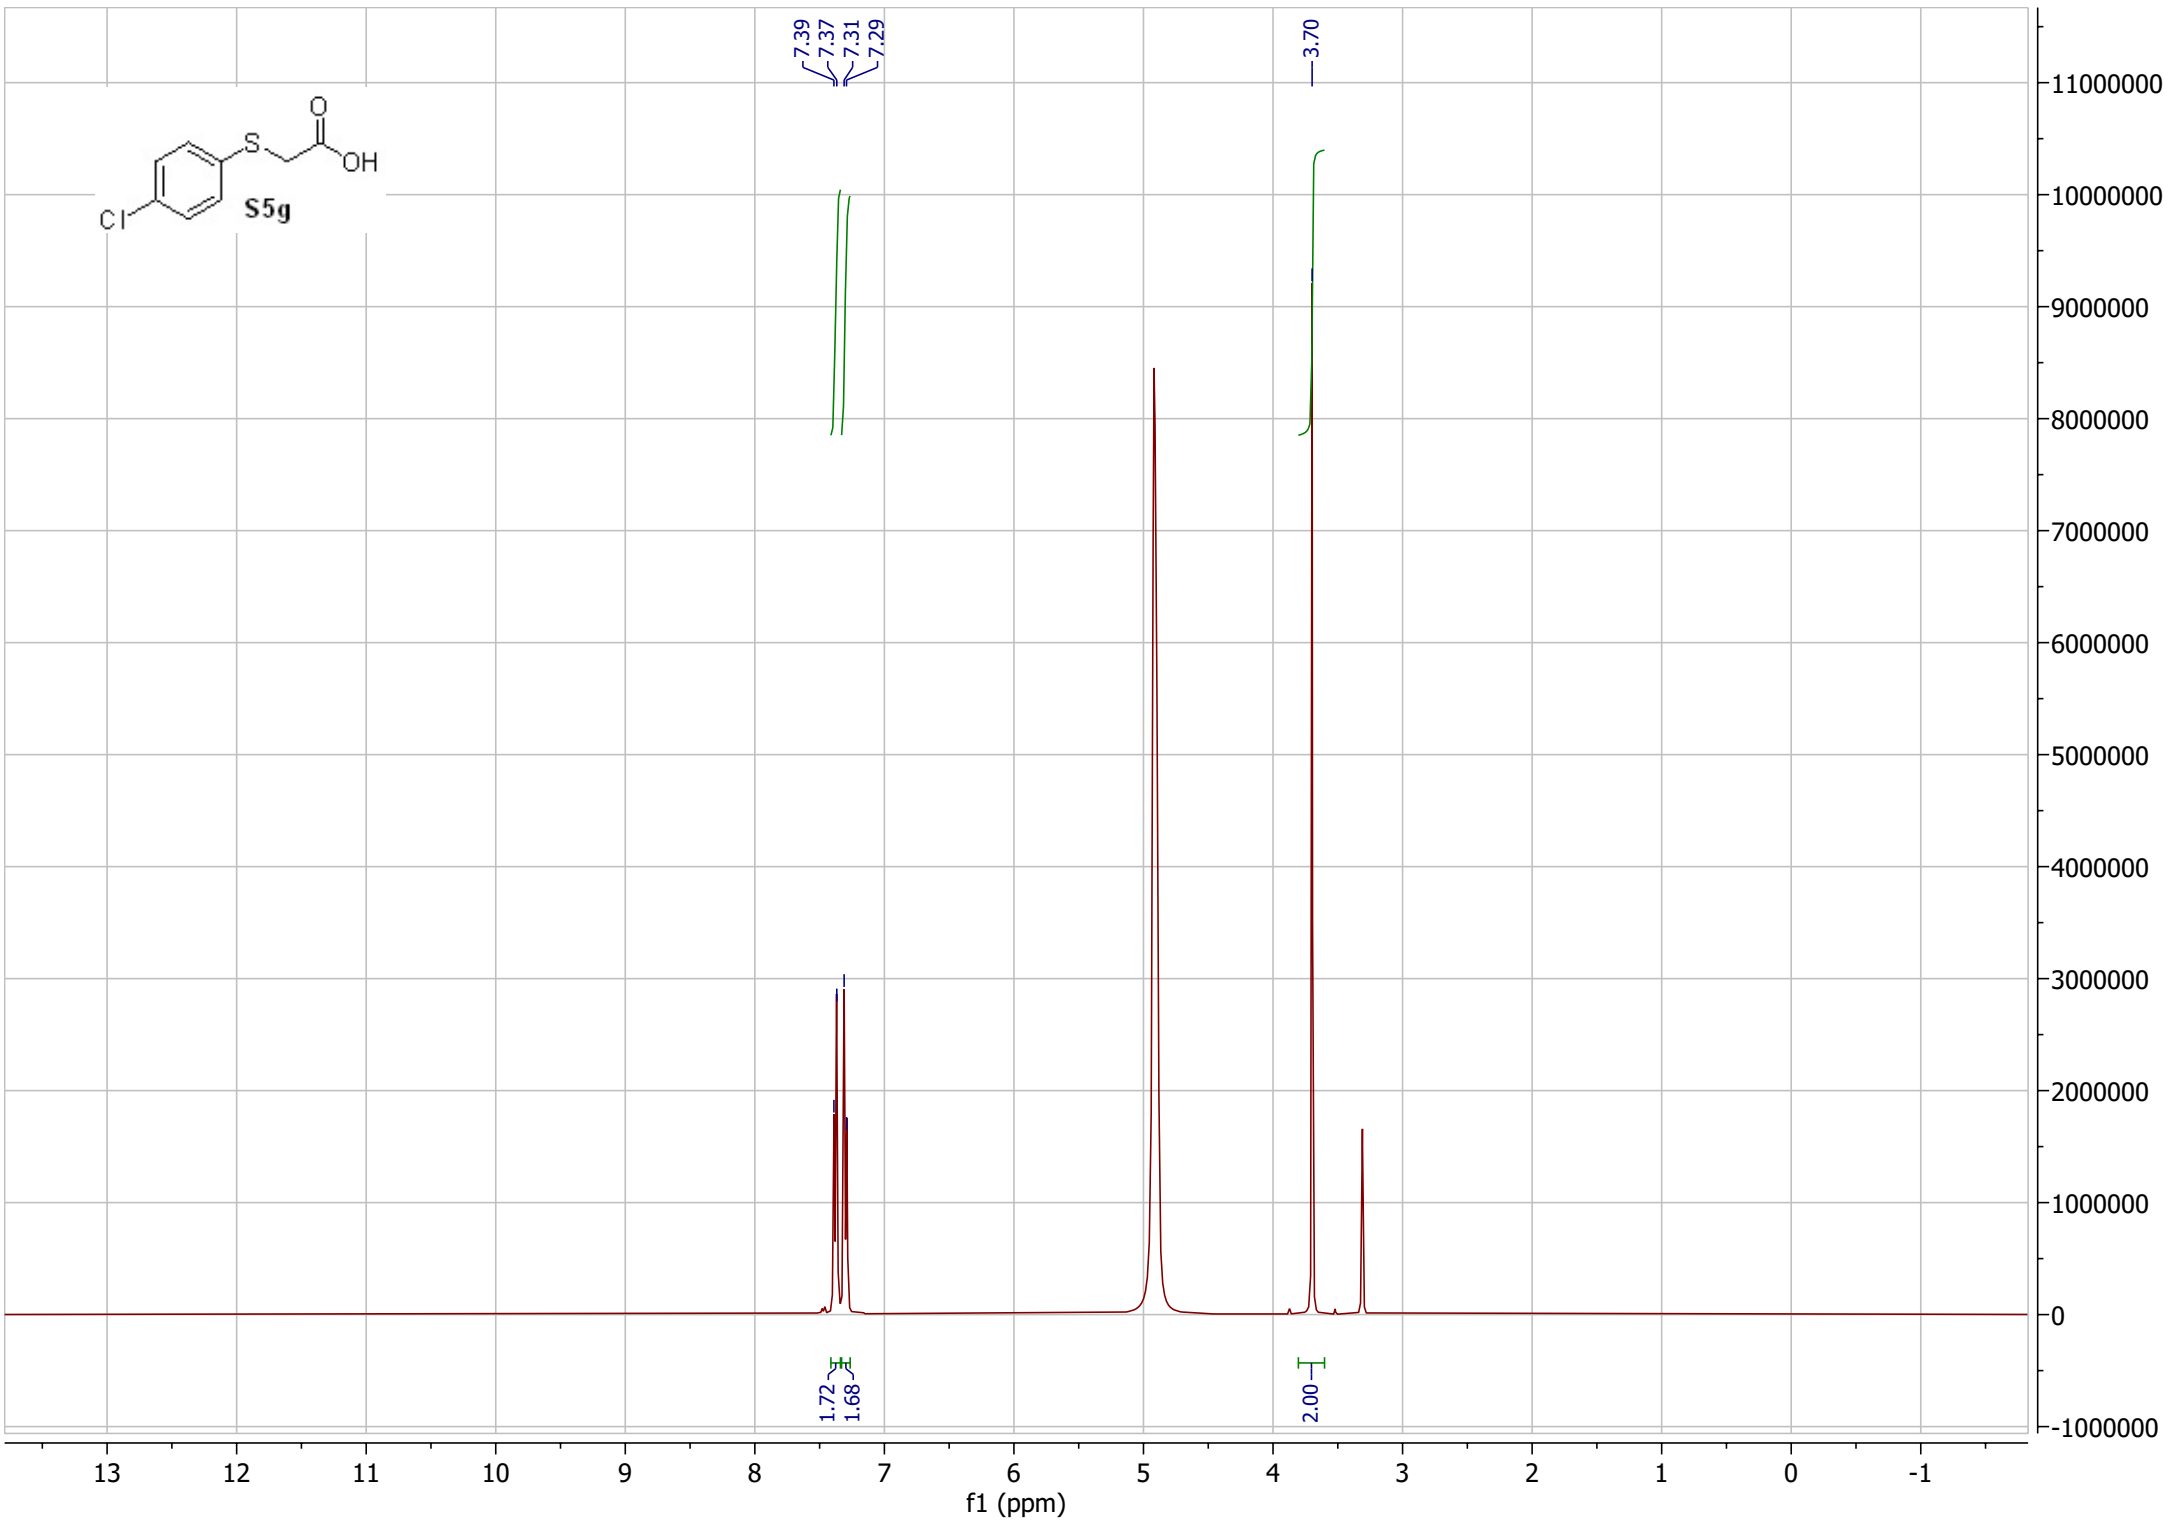

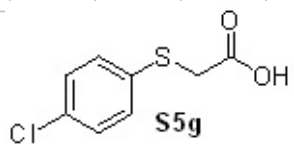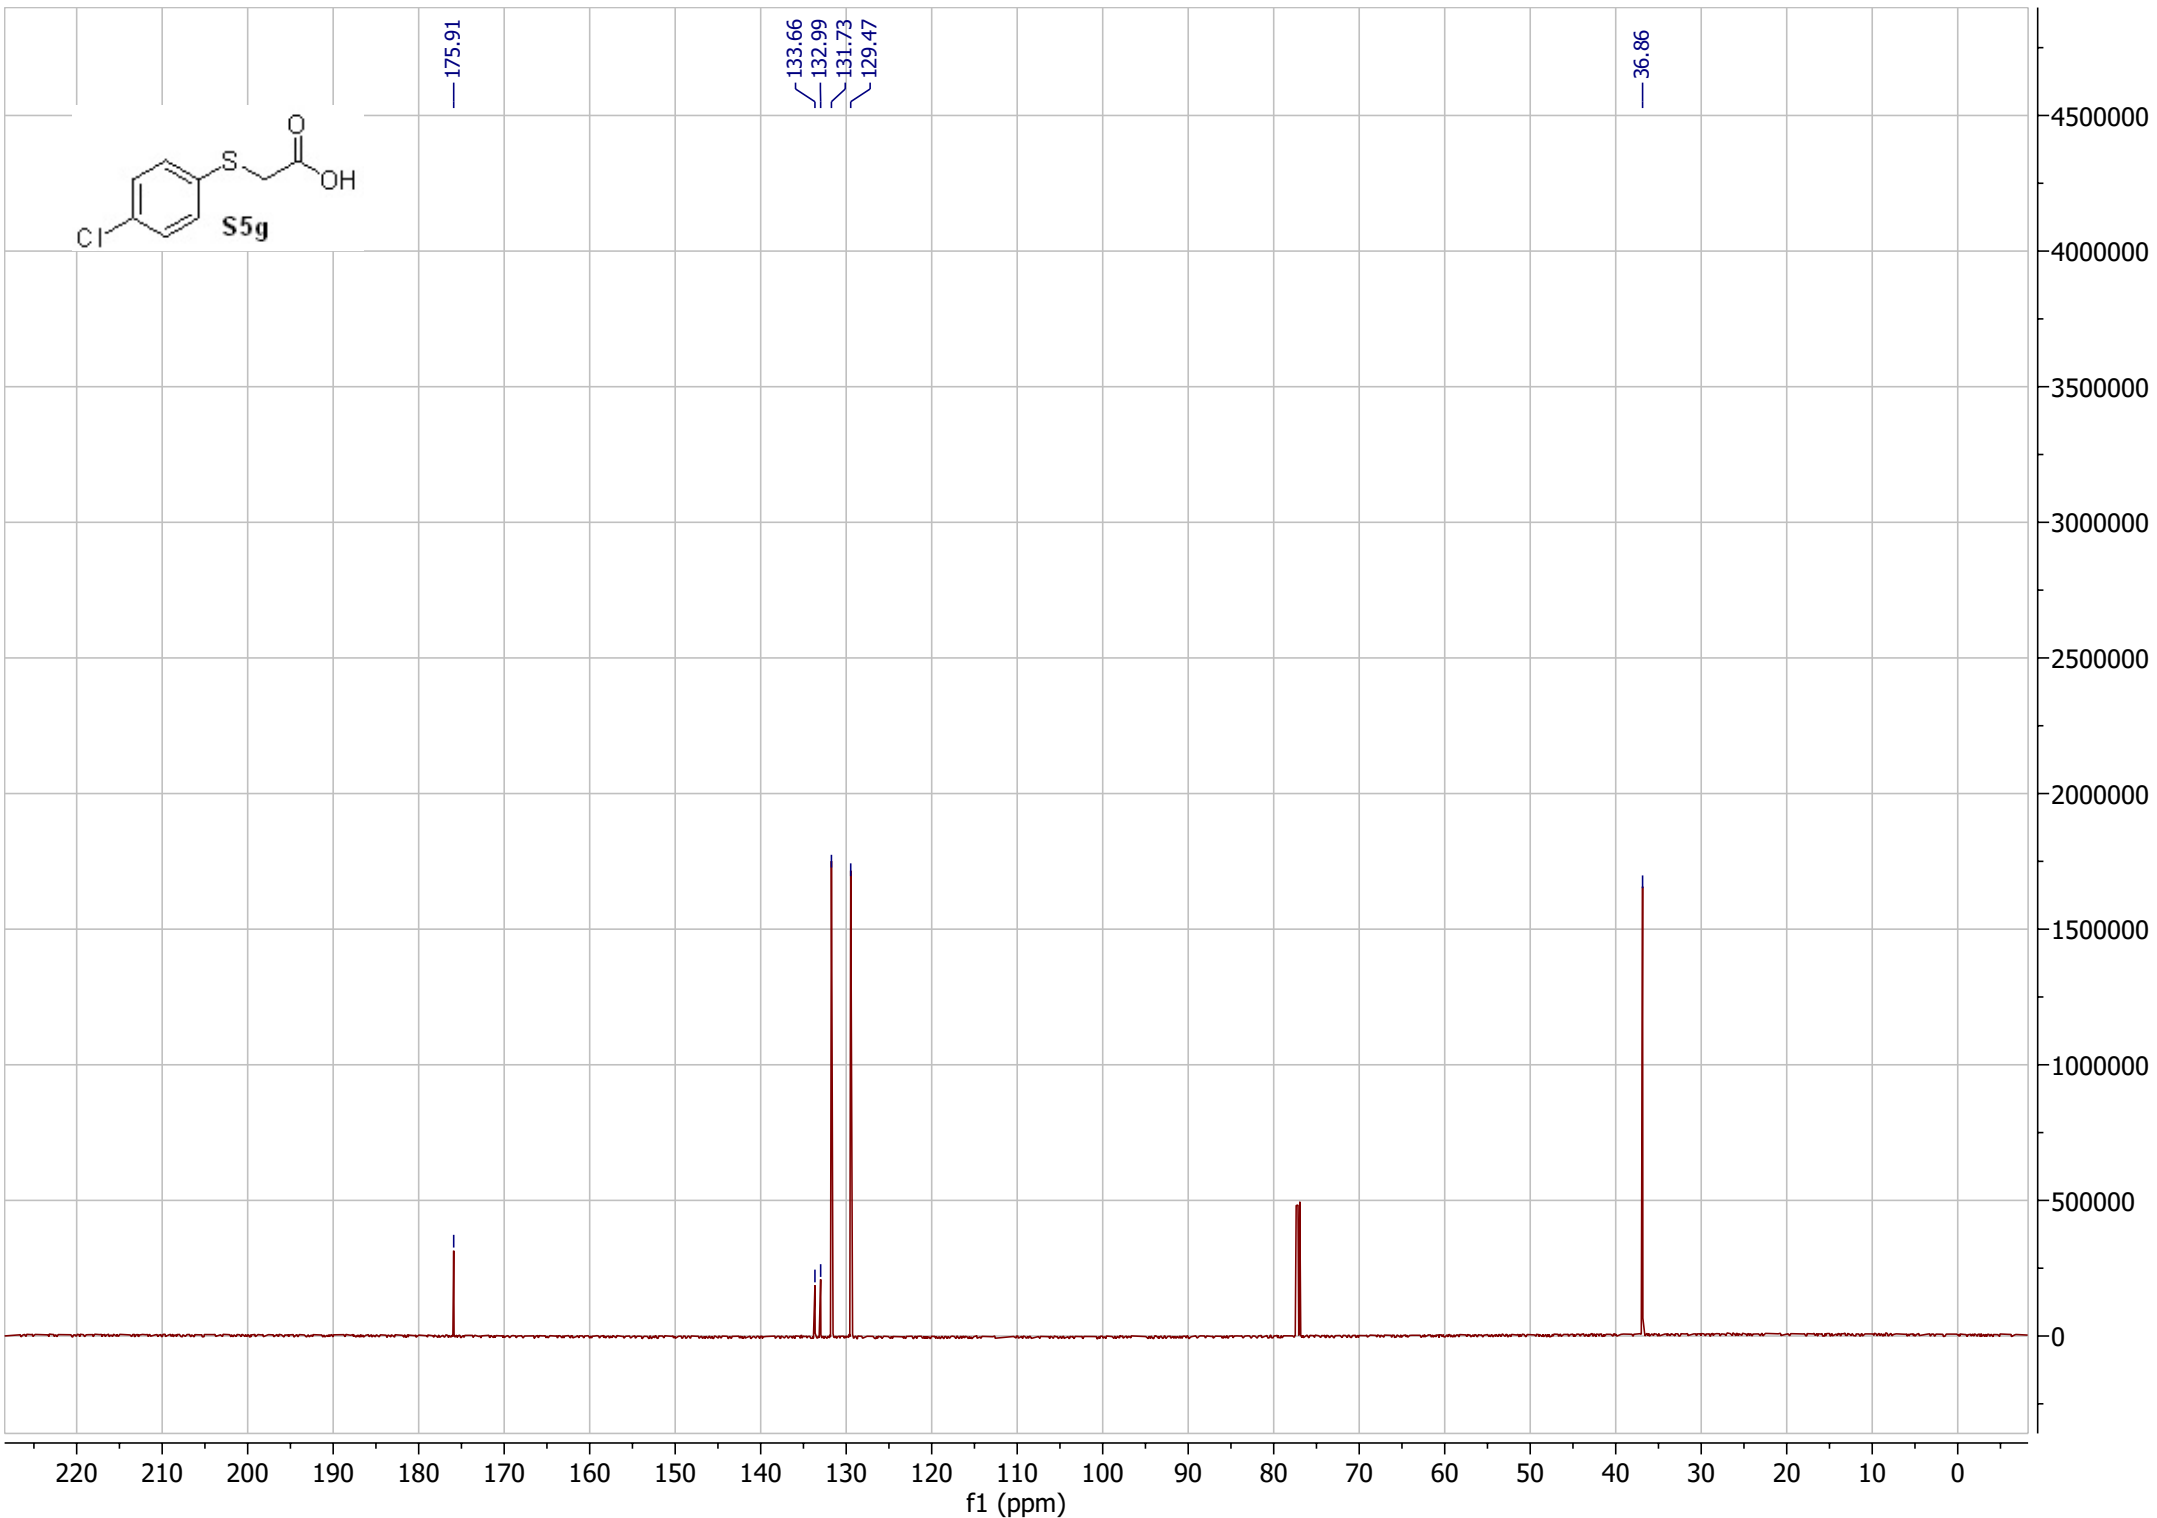

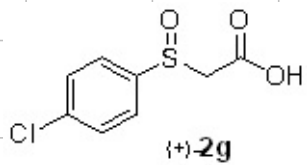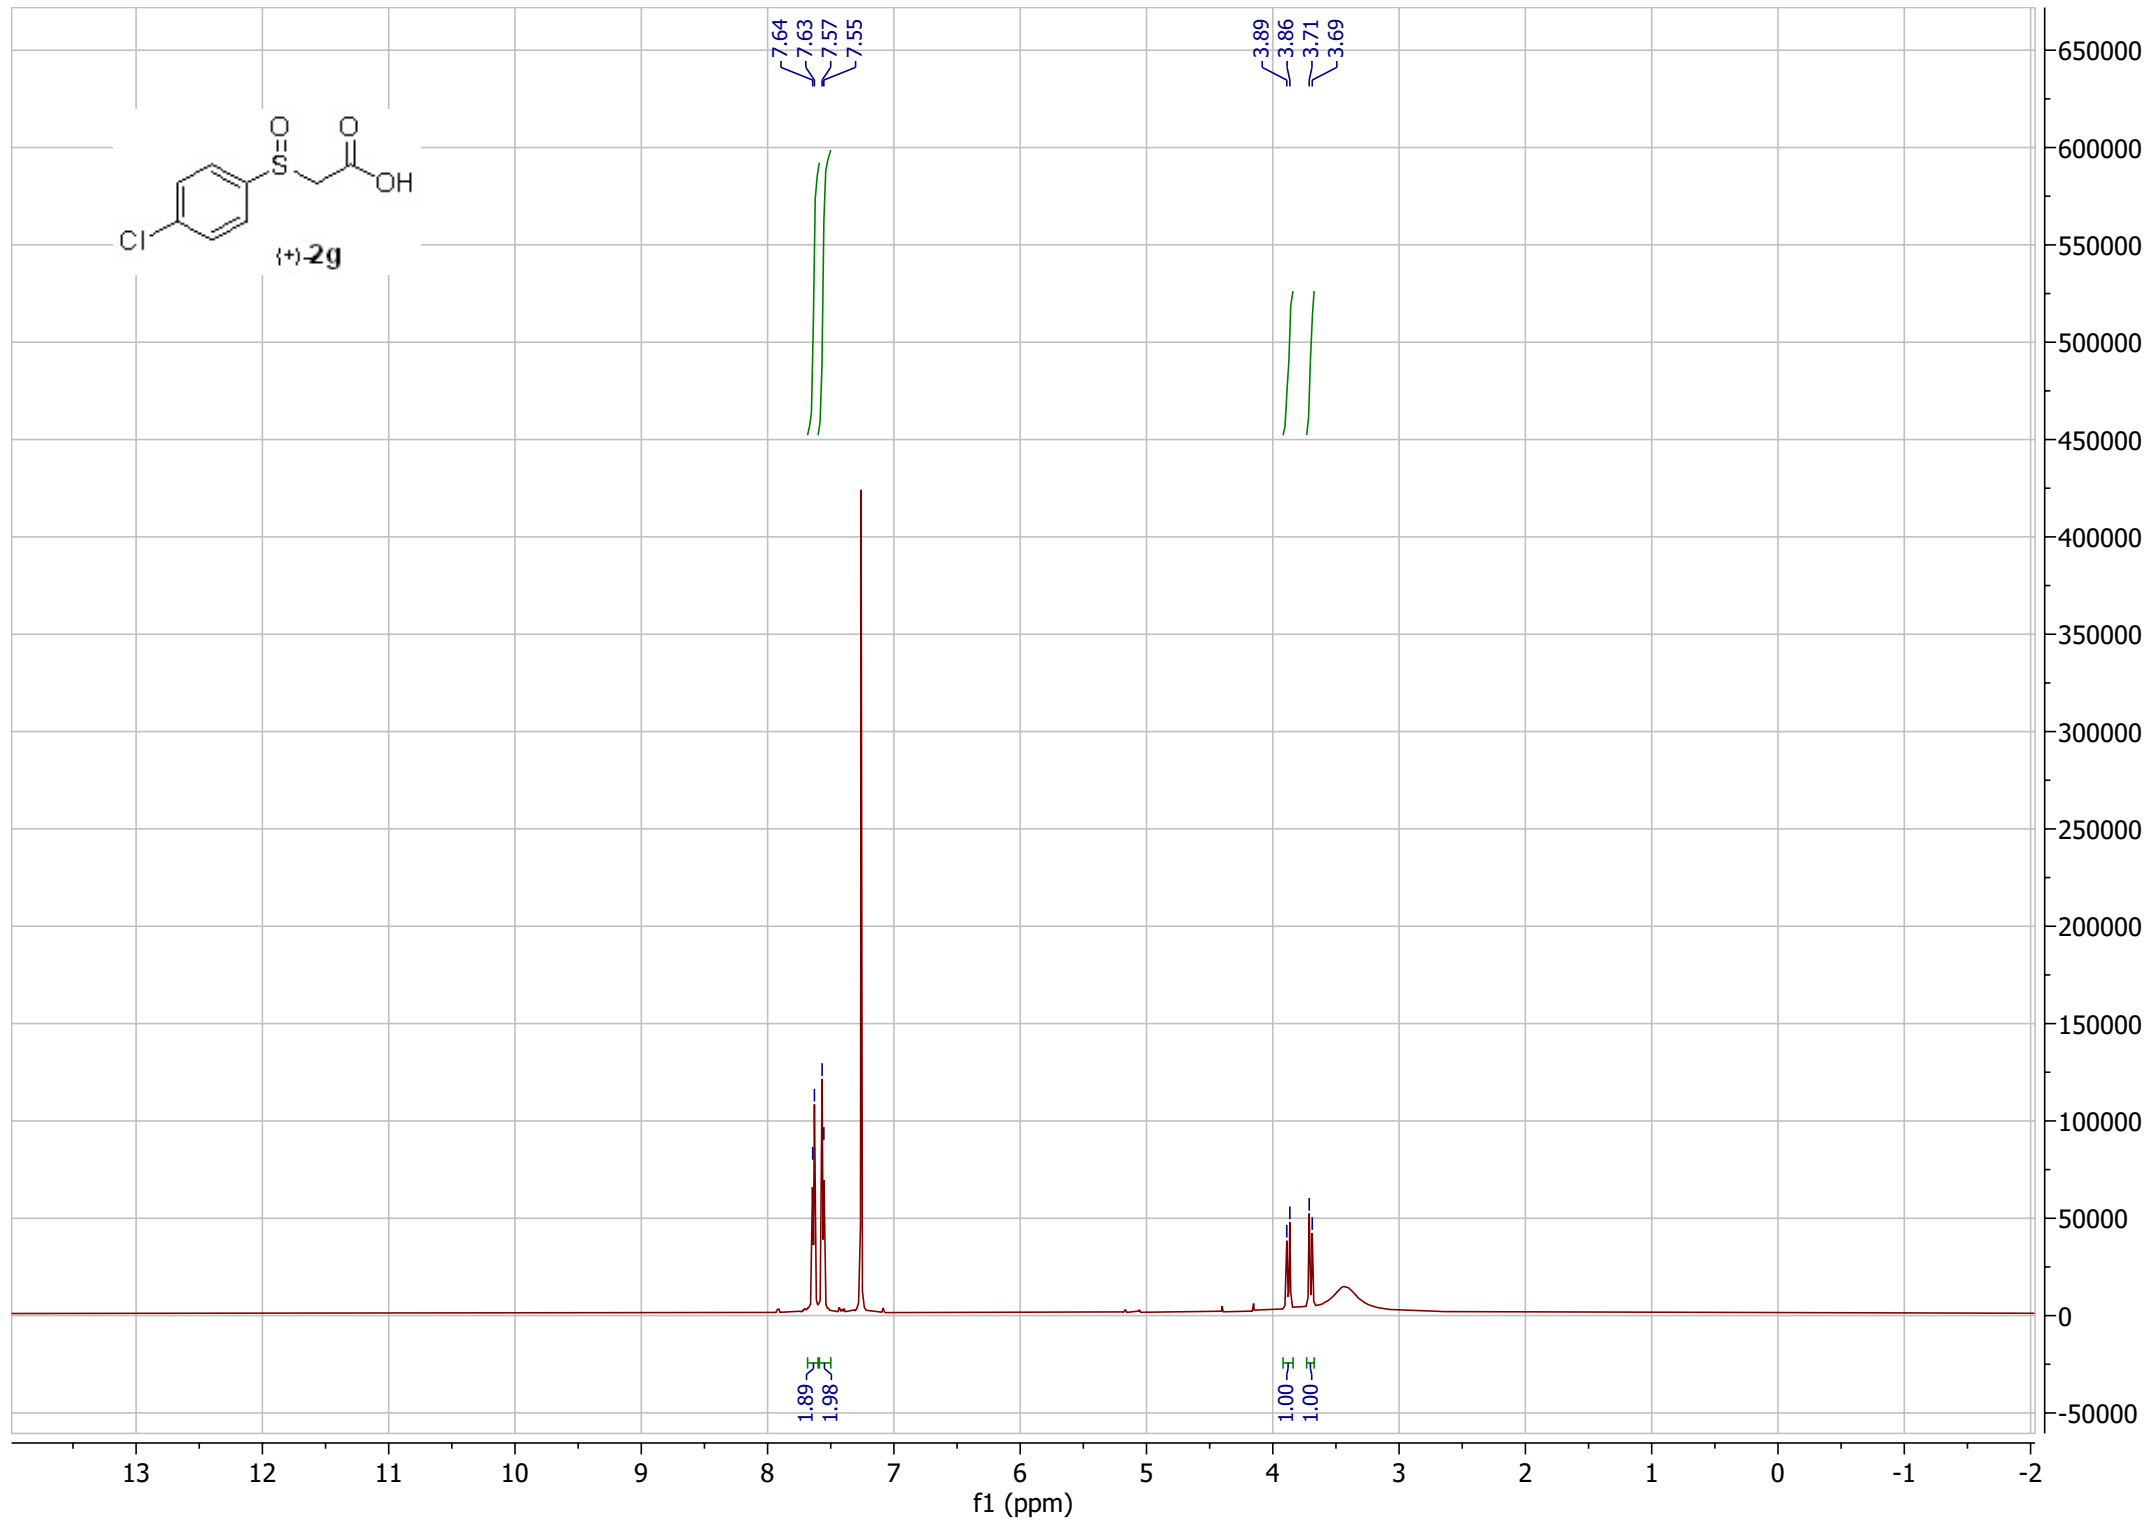

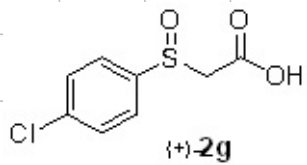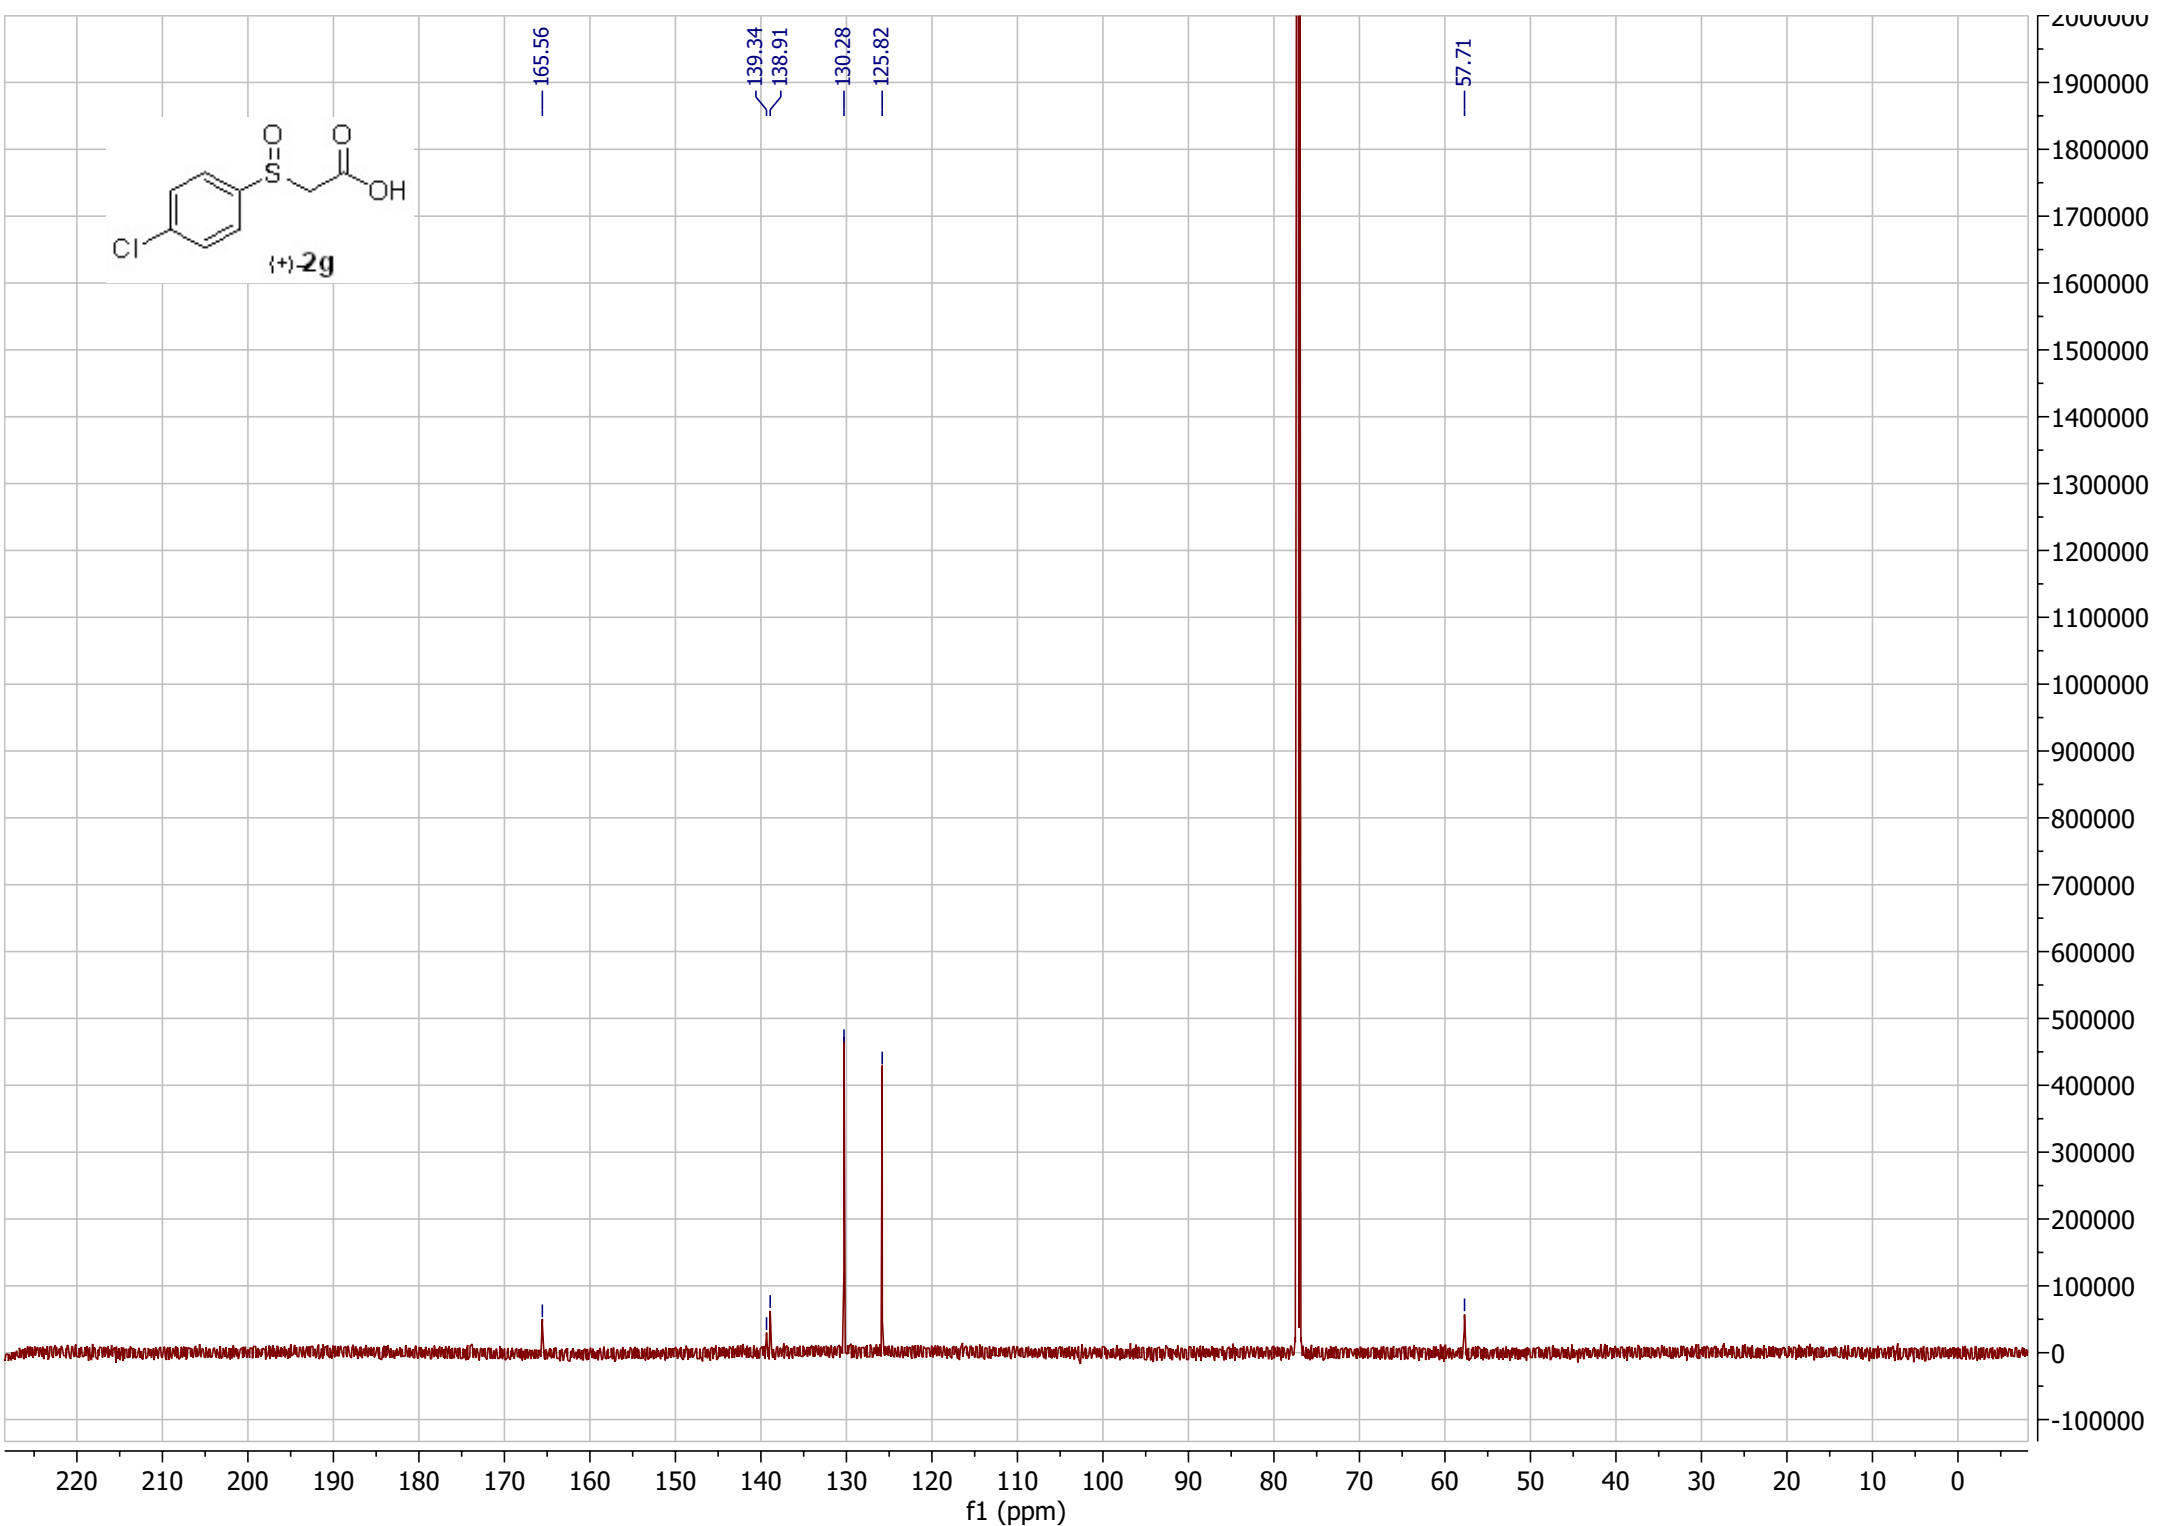



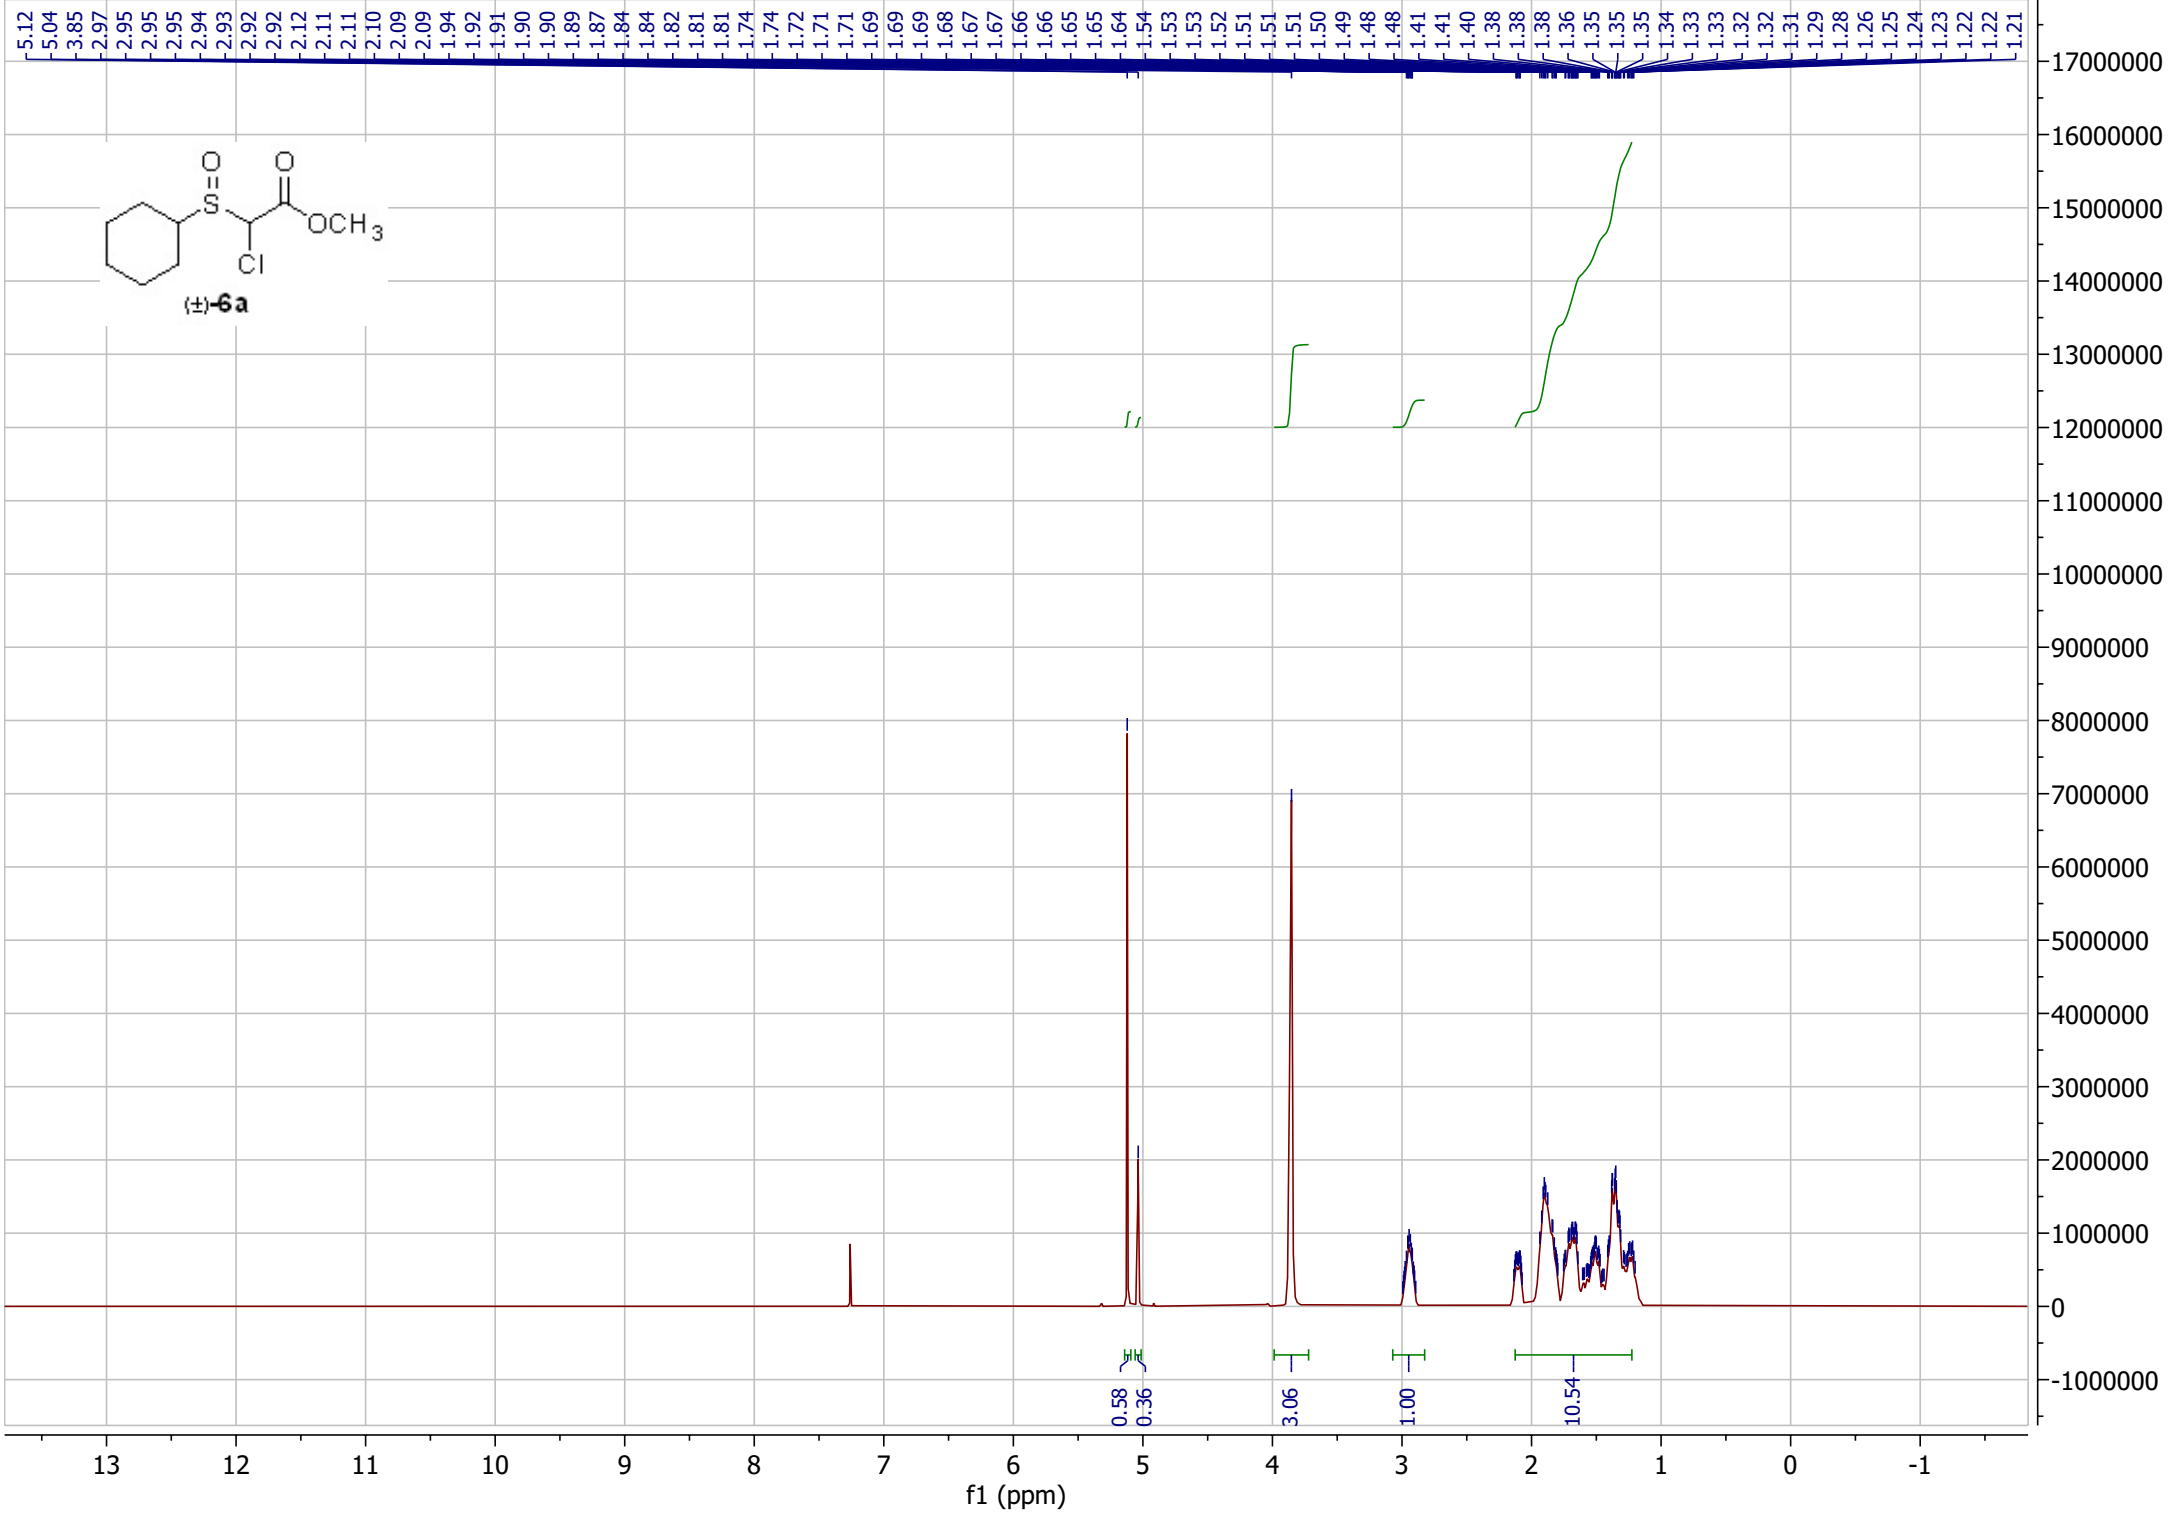

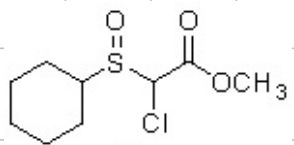

(±)-6a

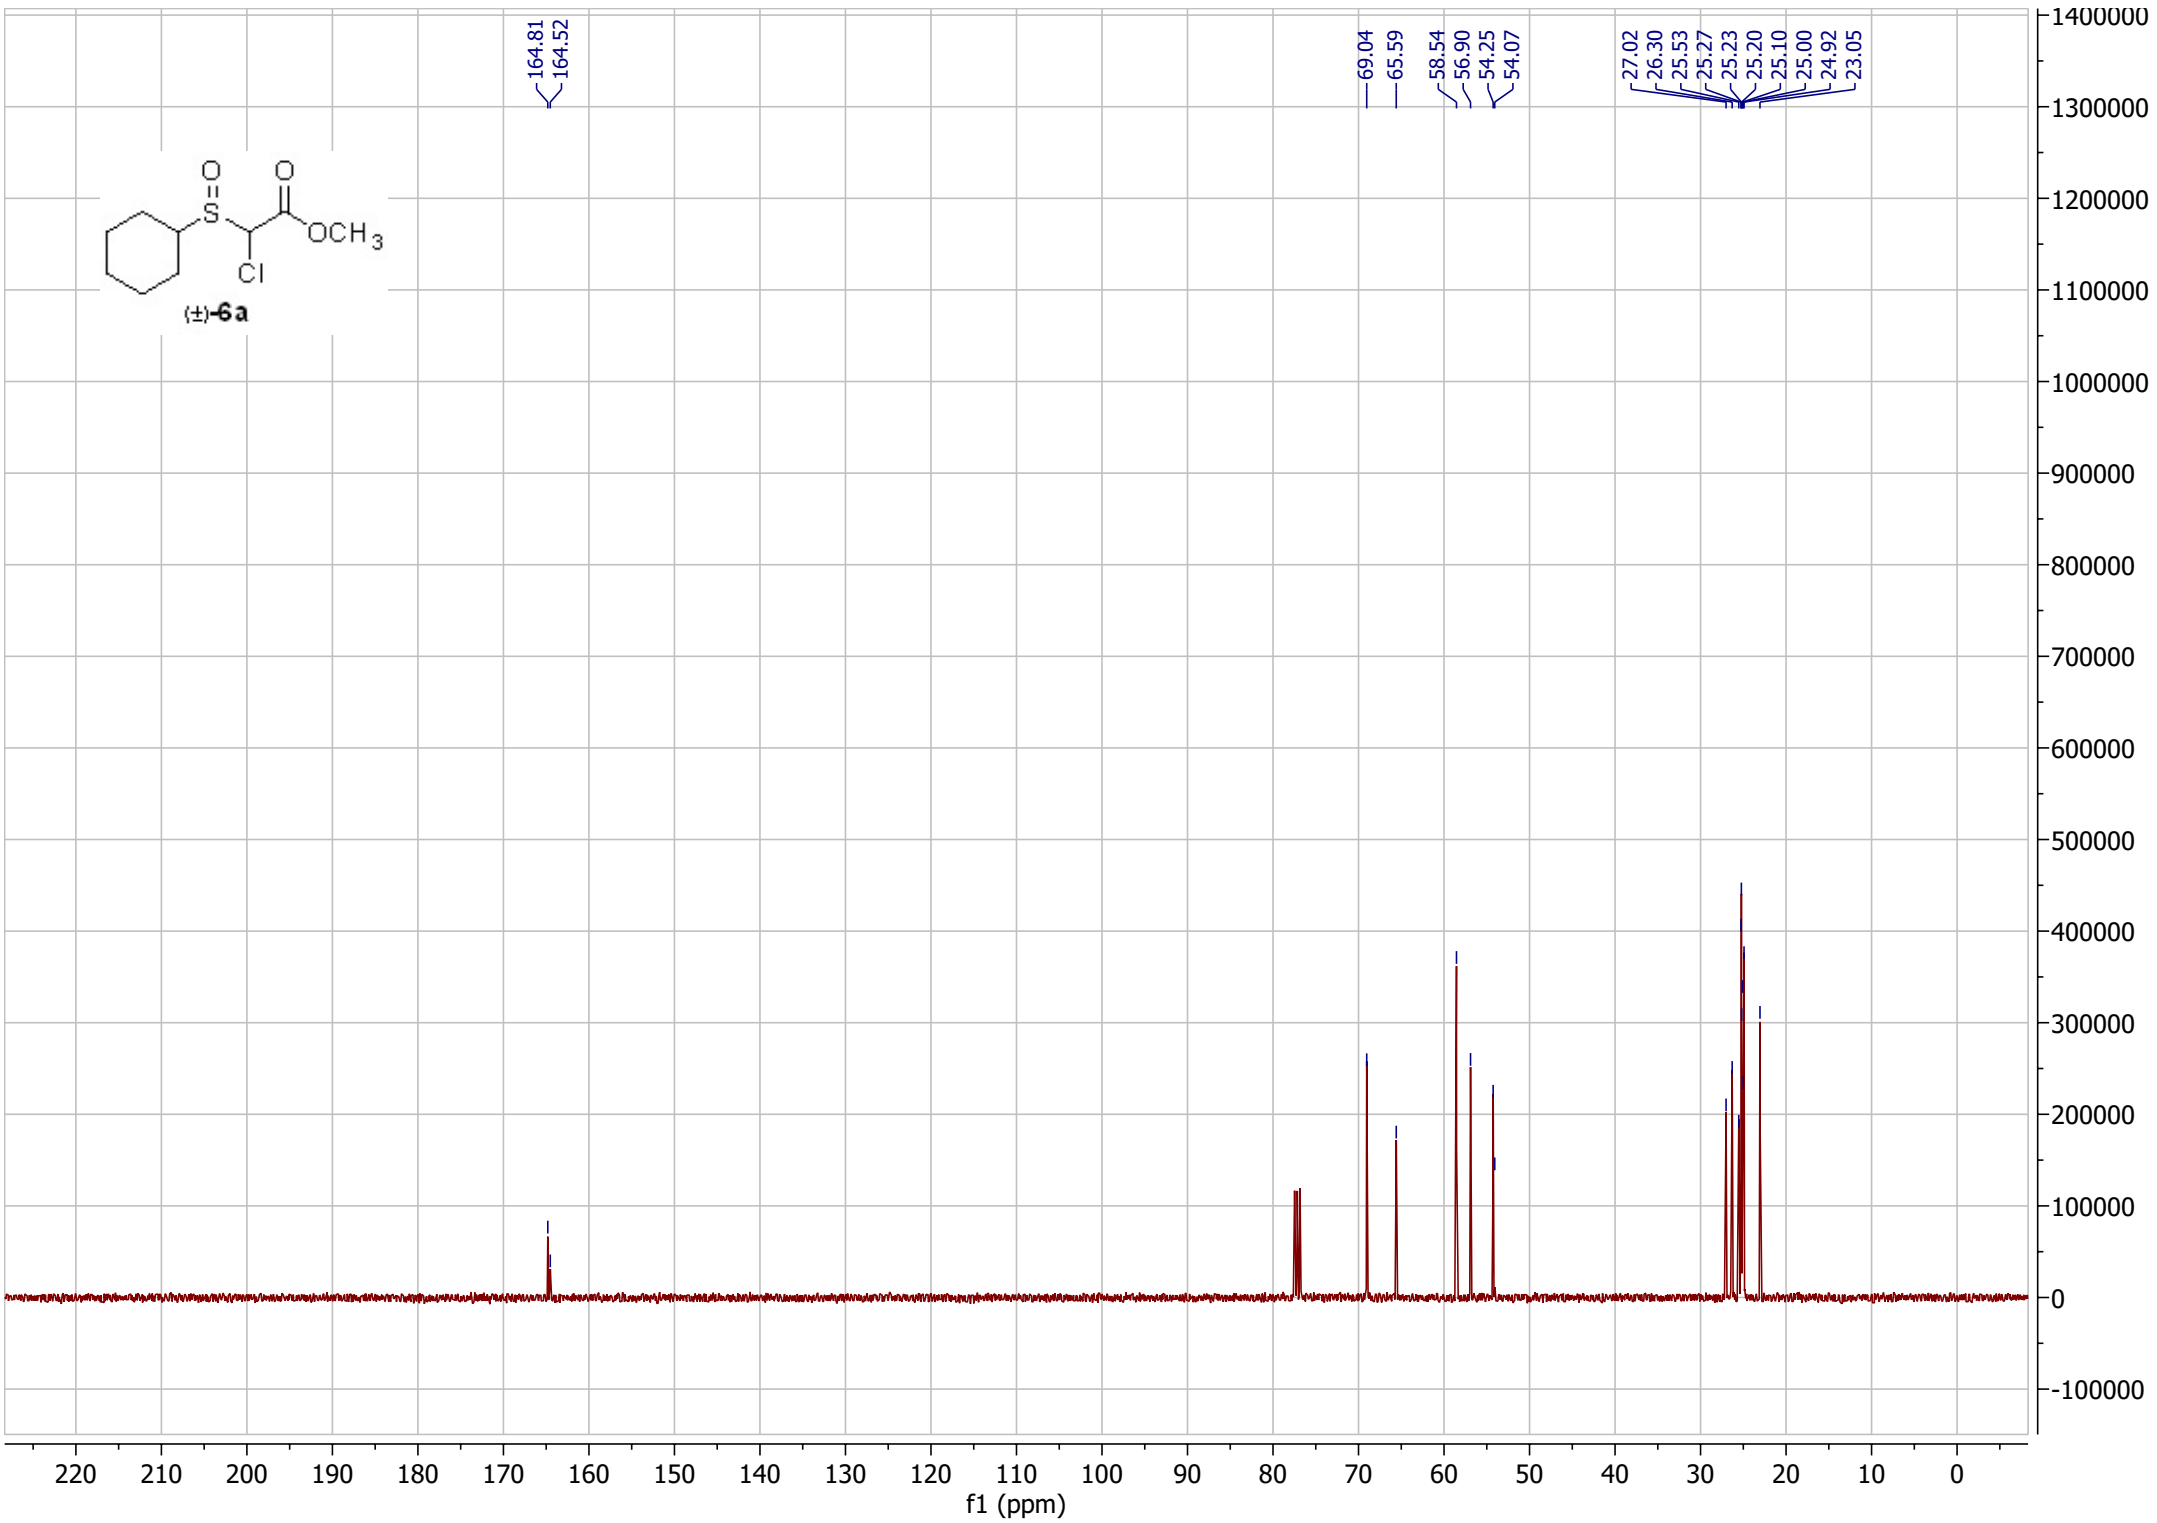

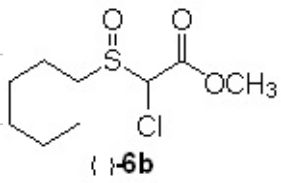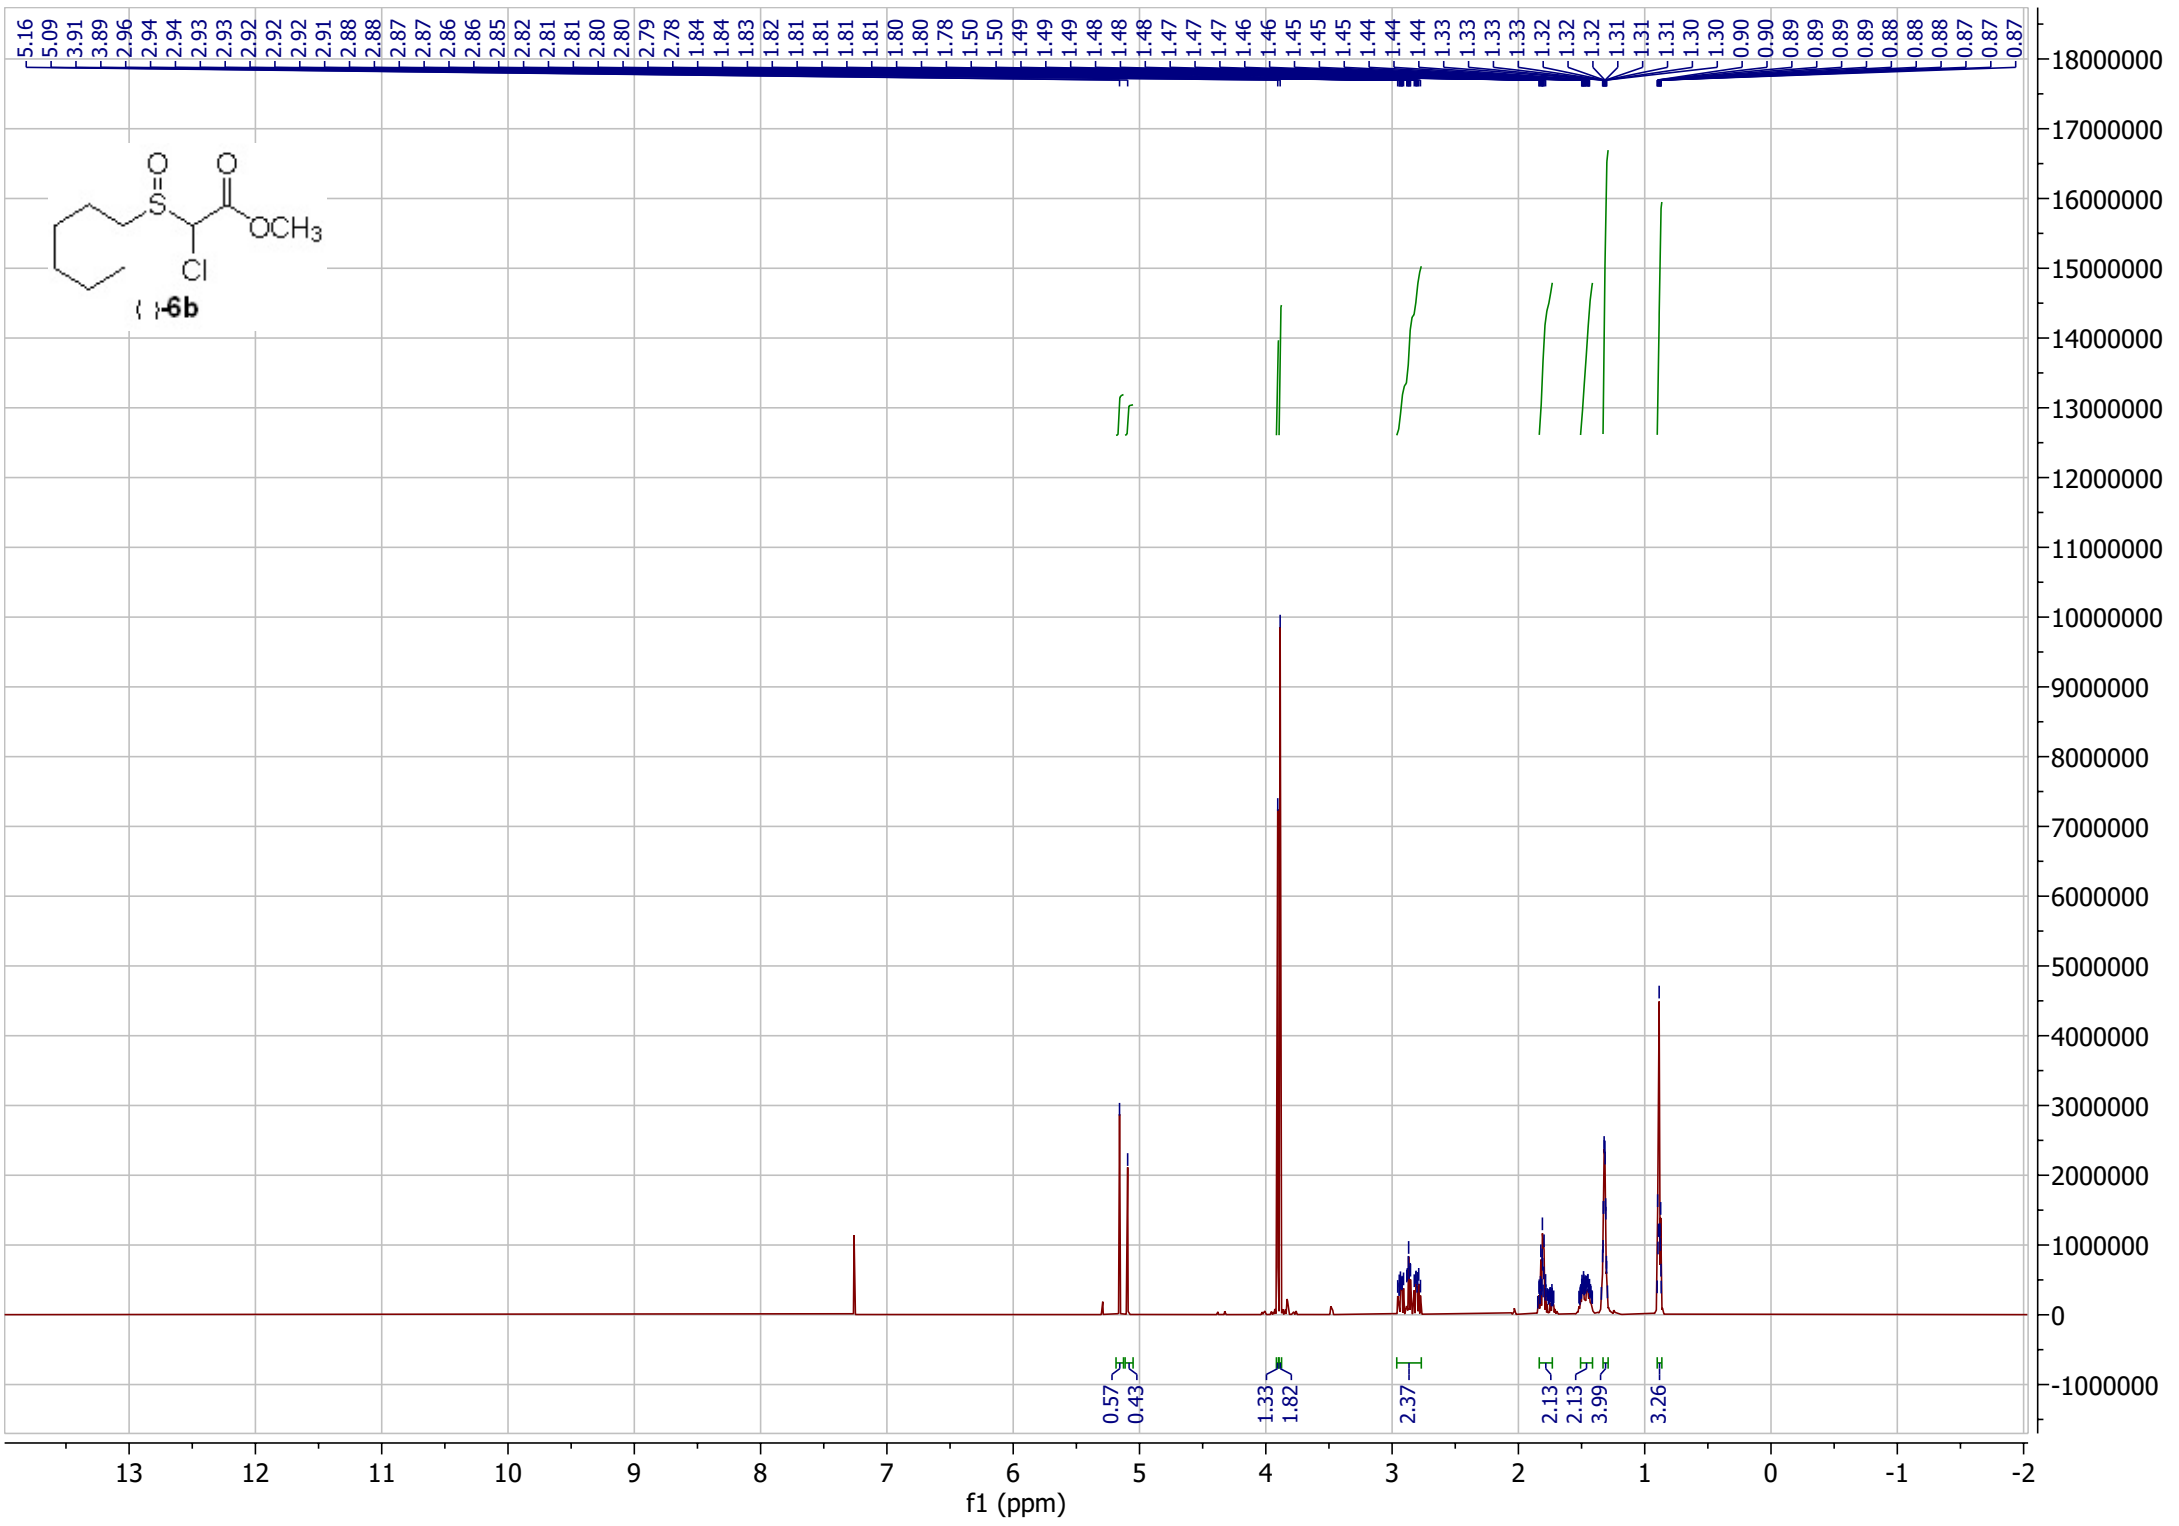

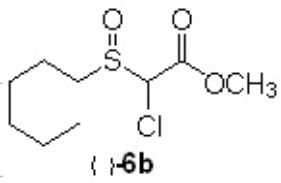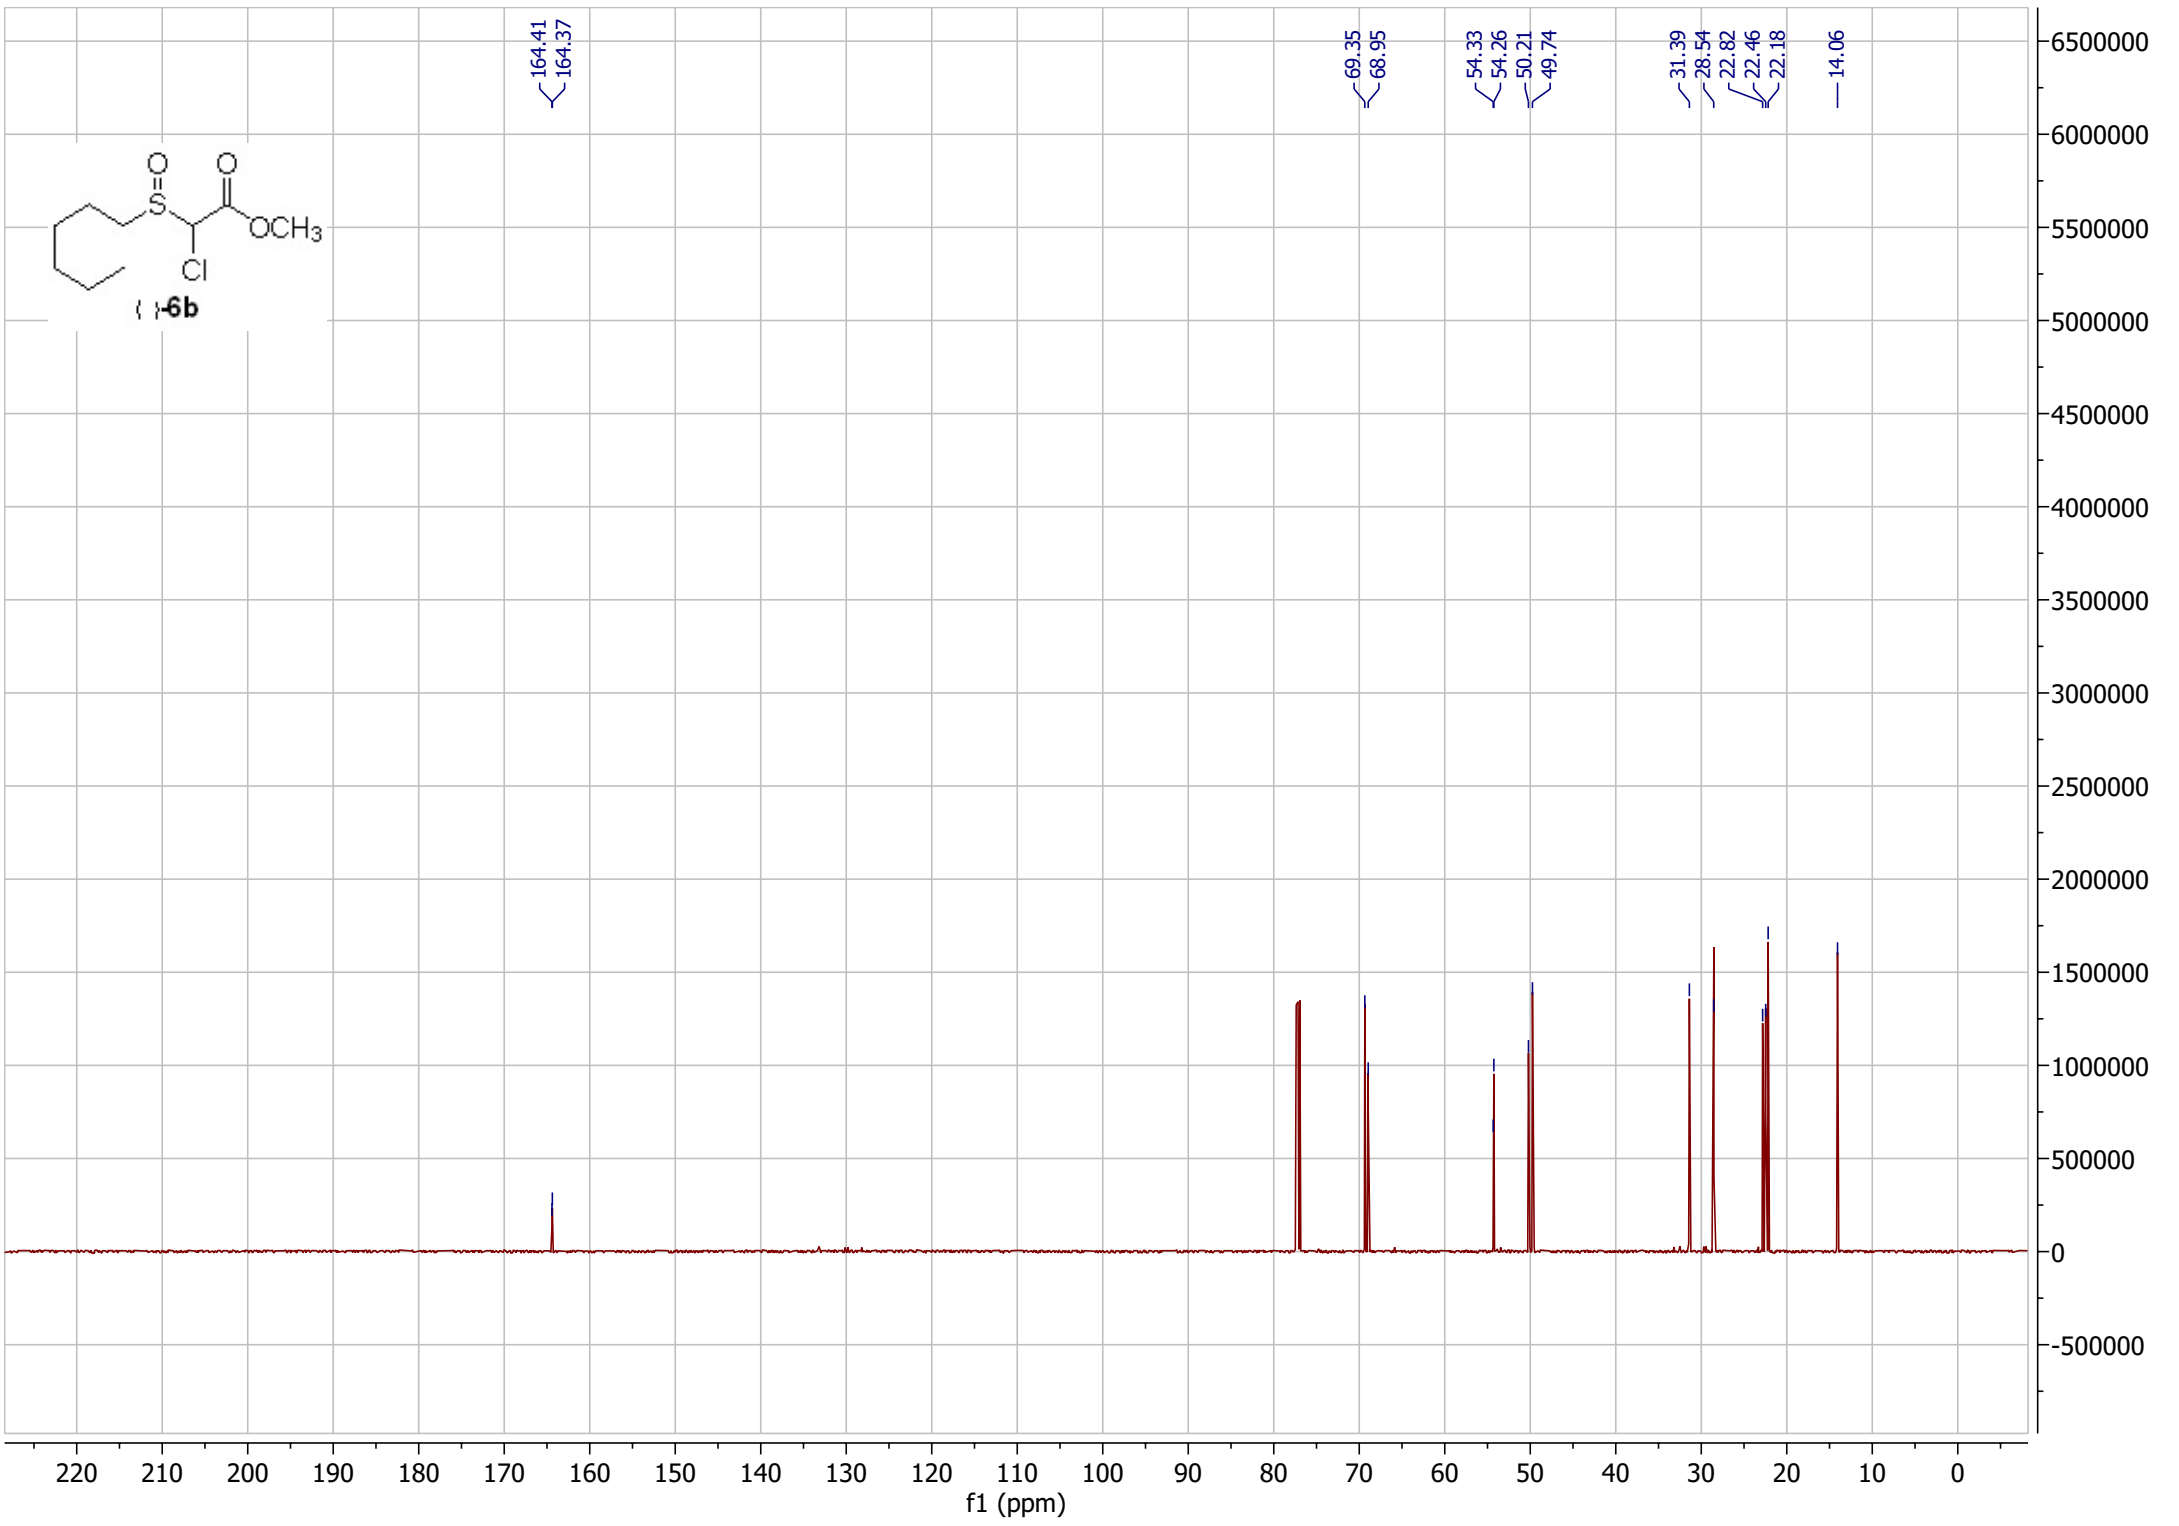

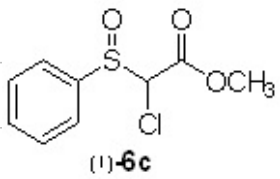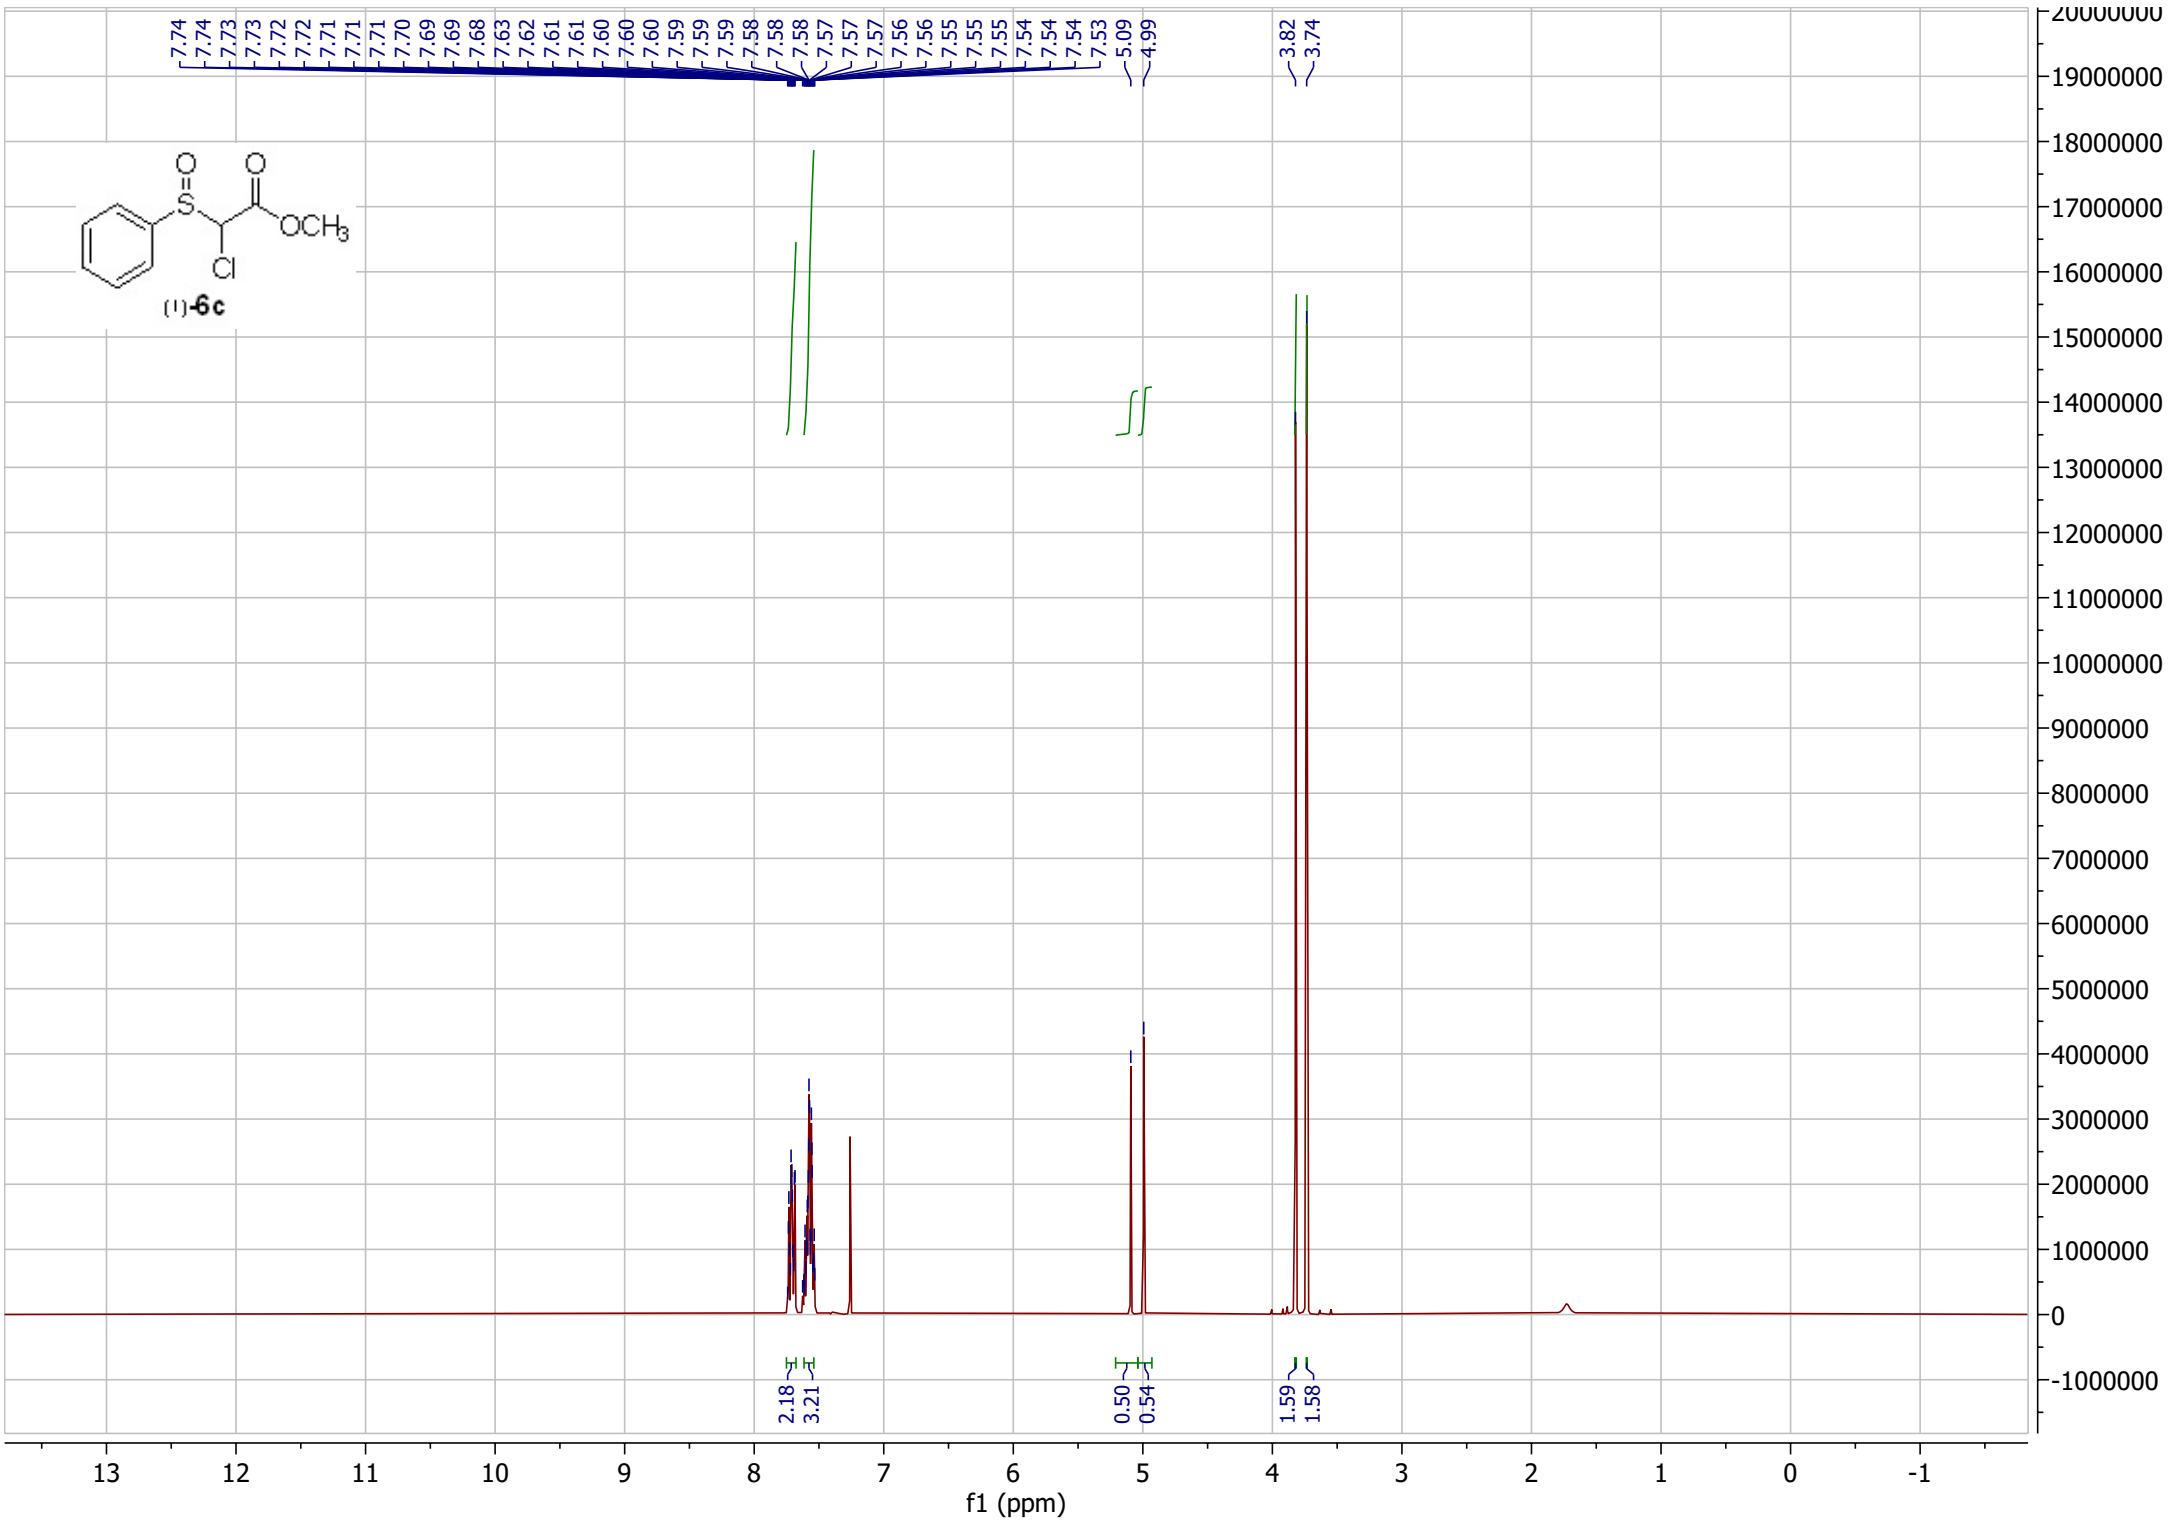

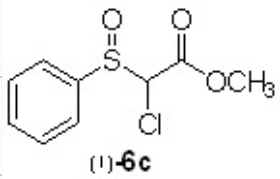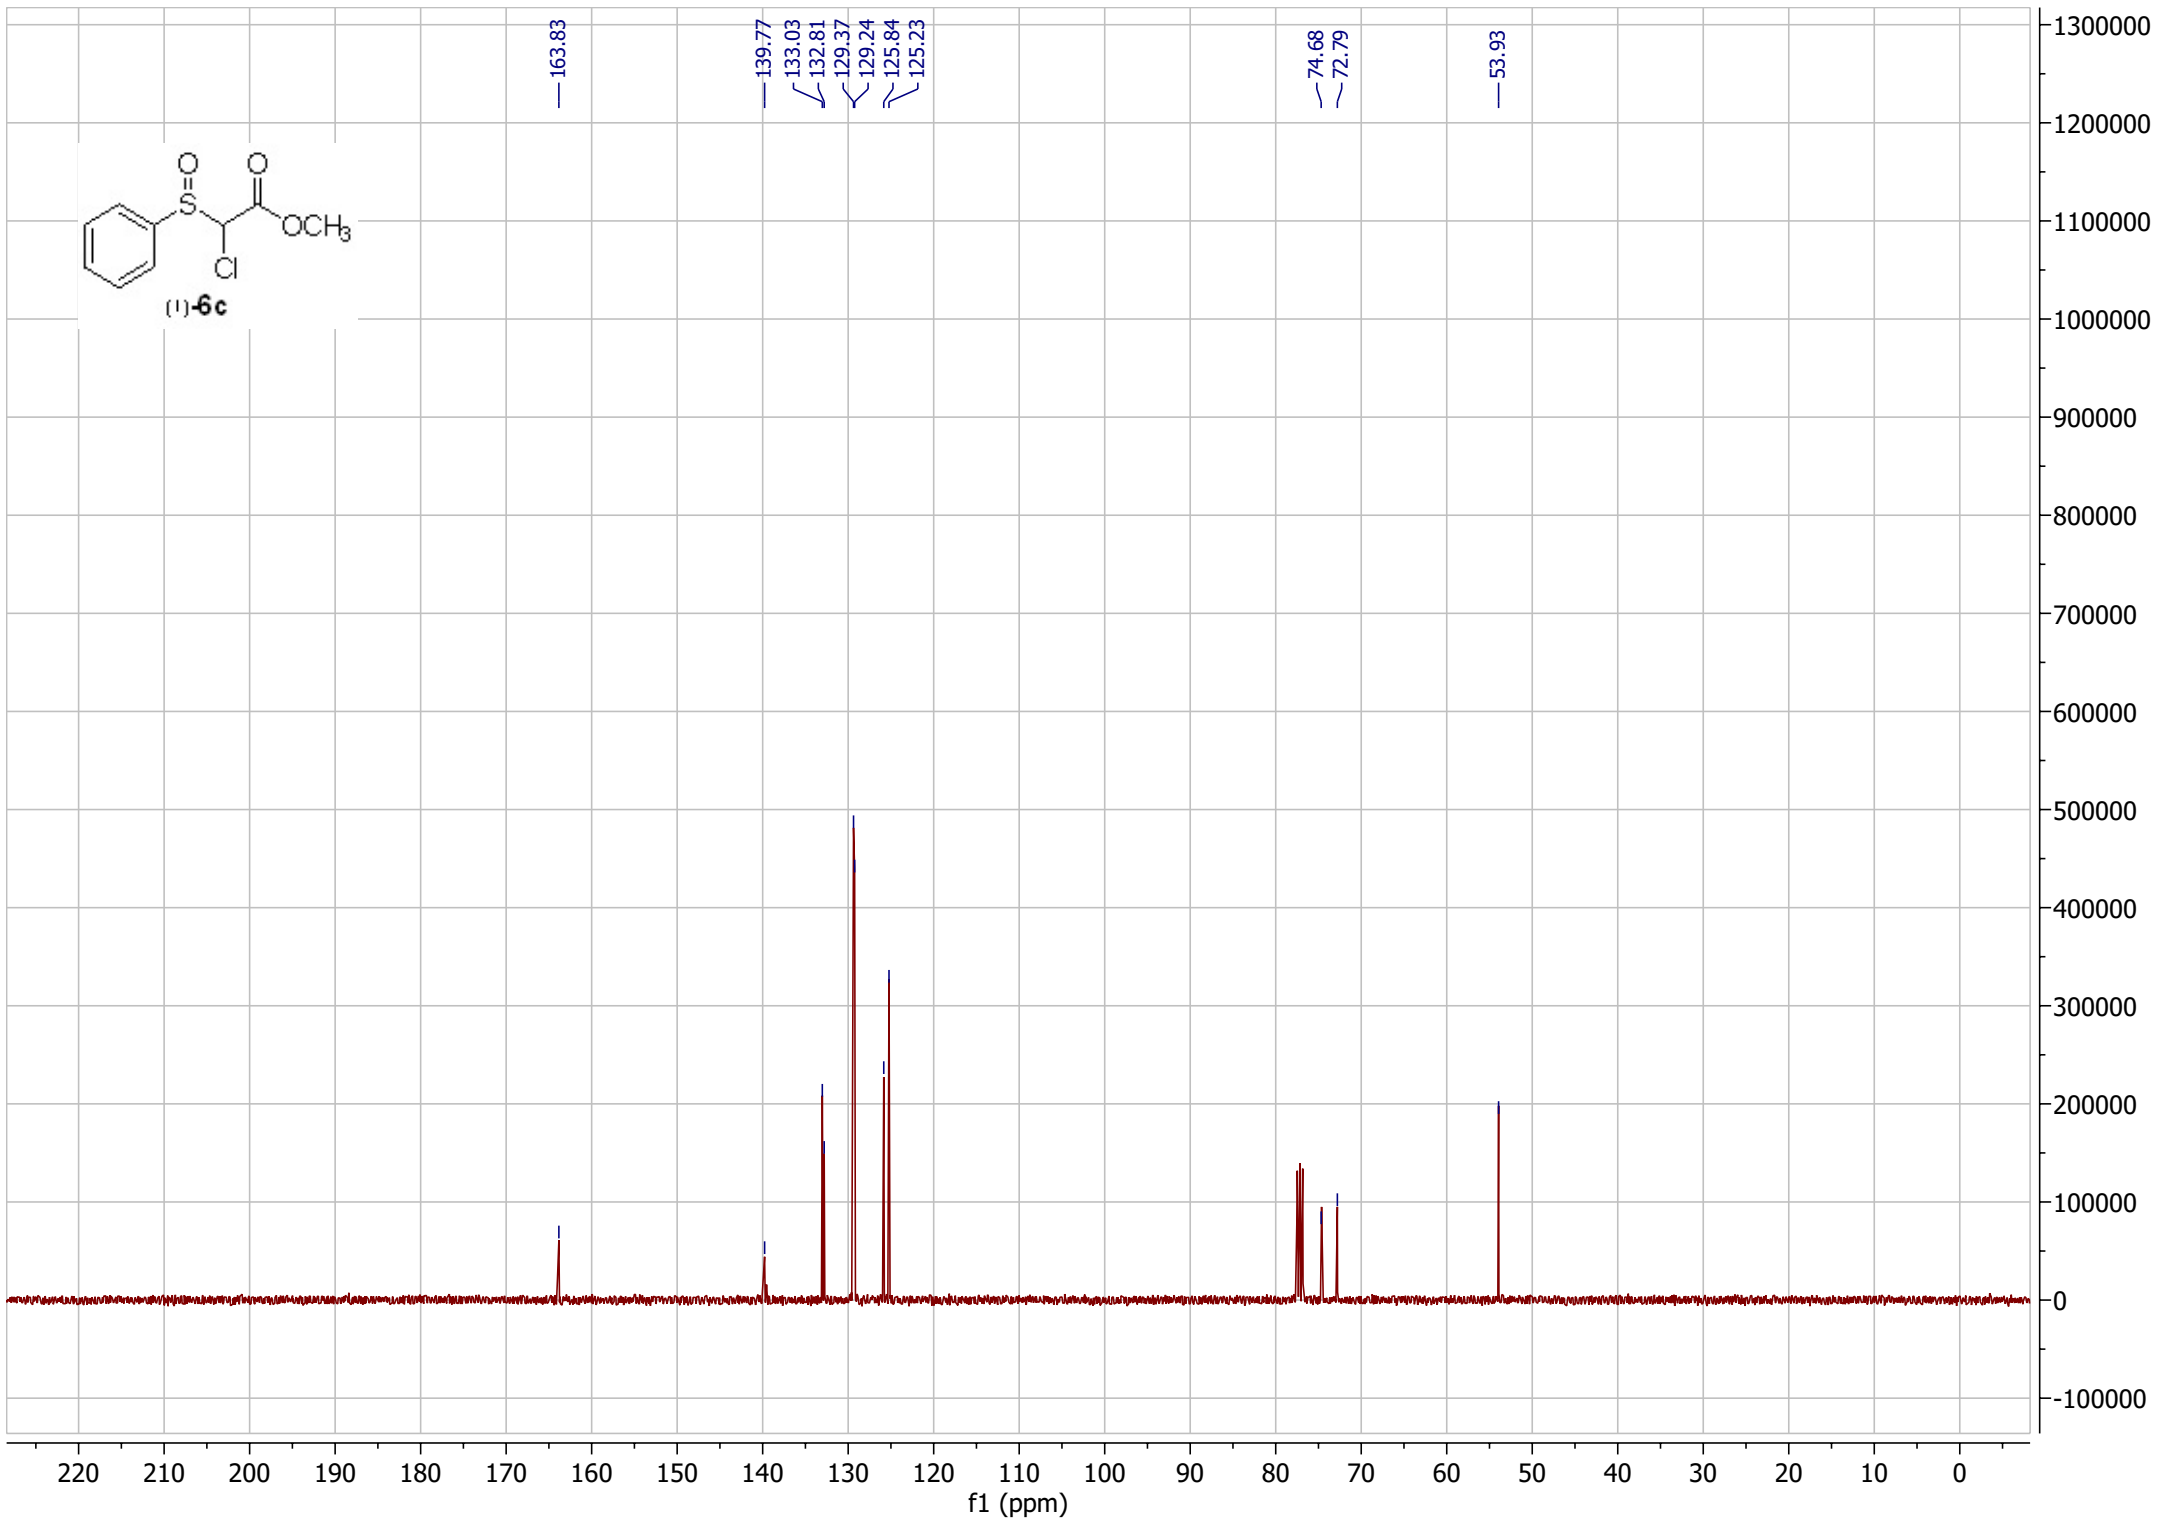

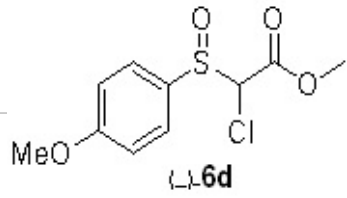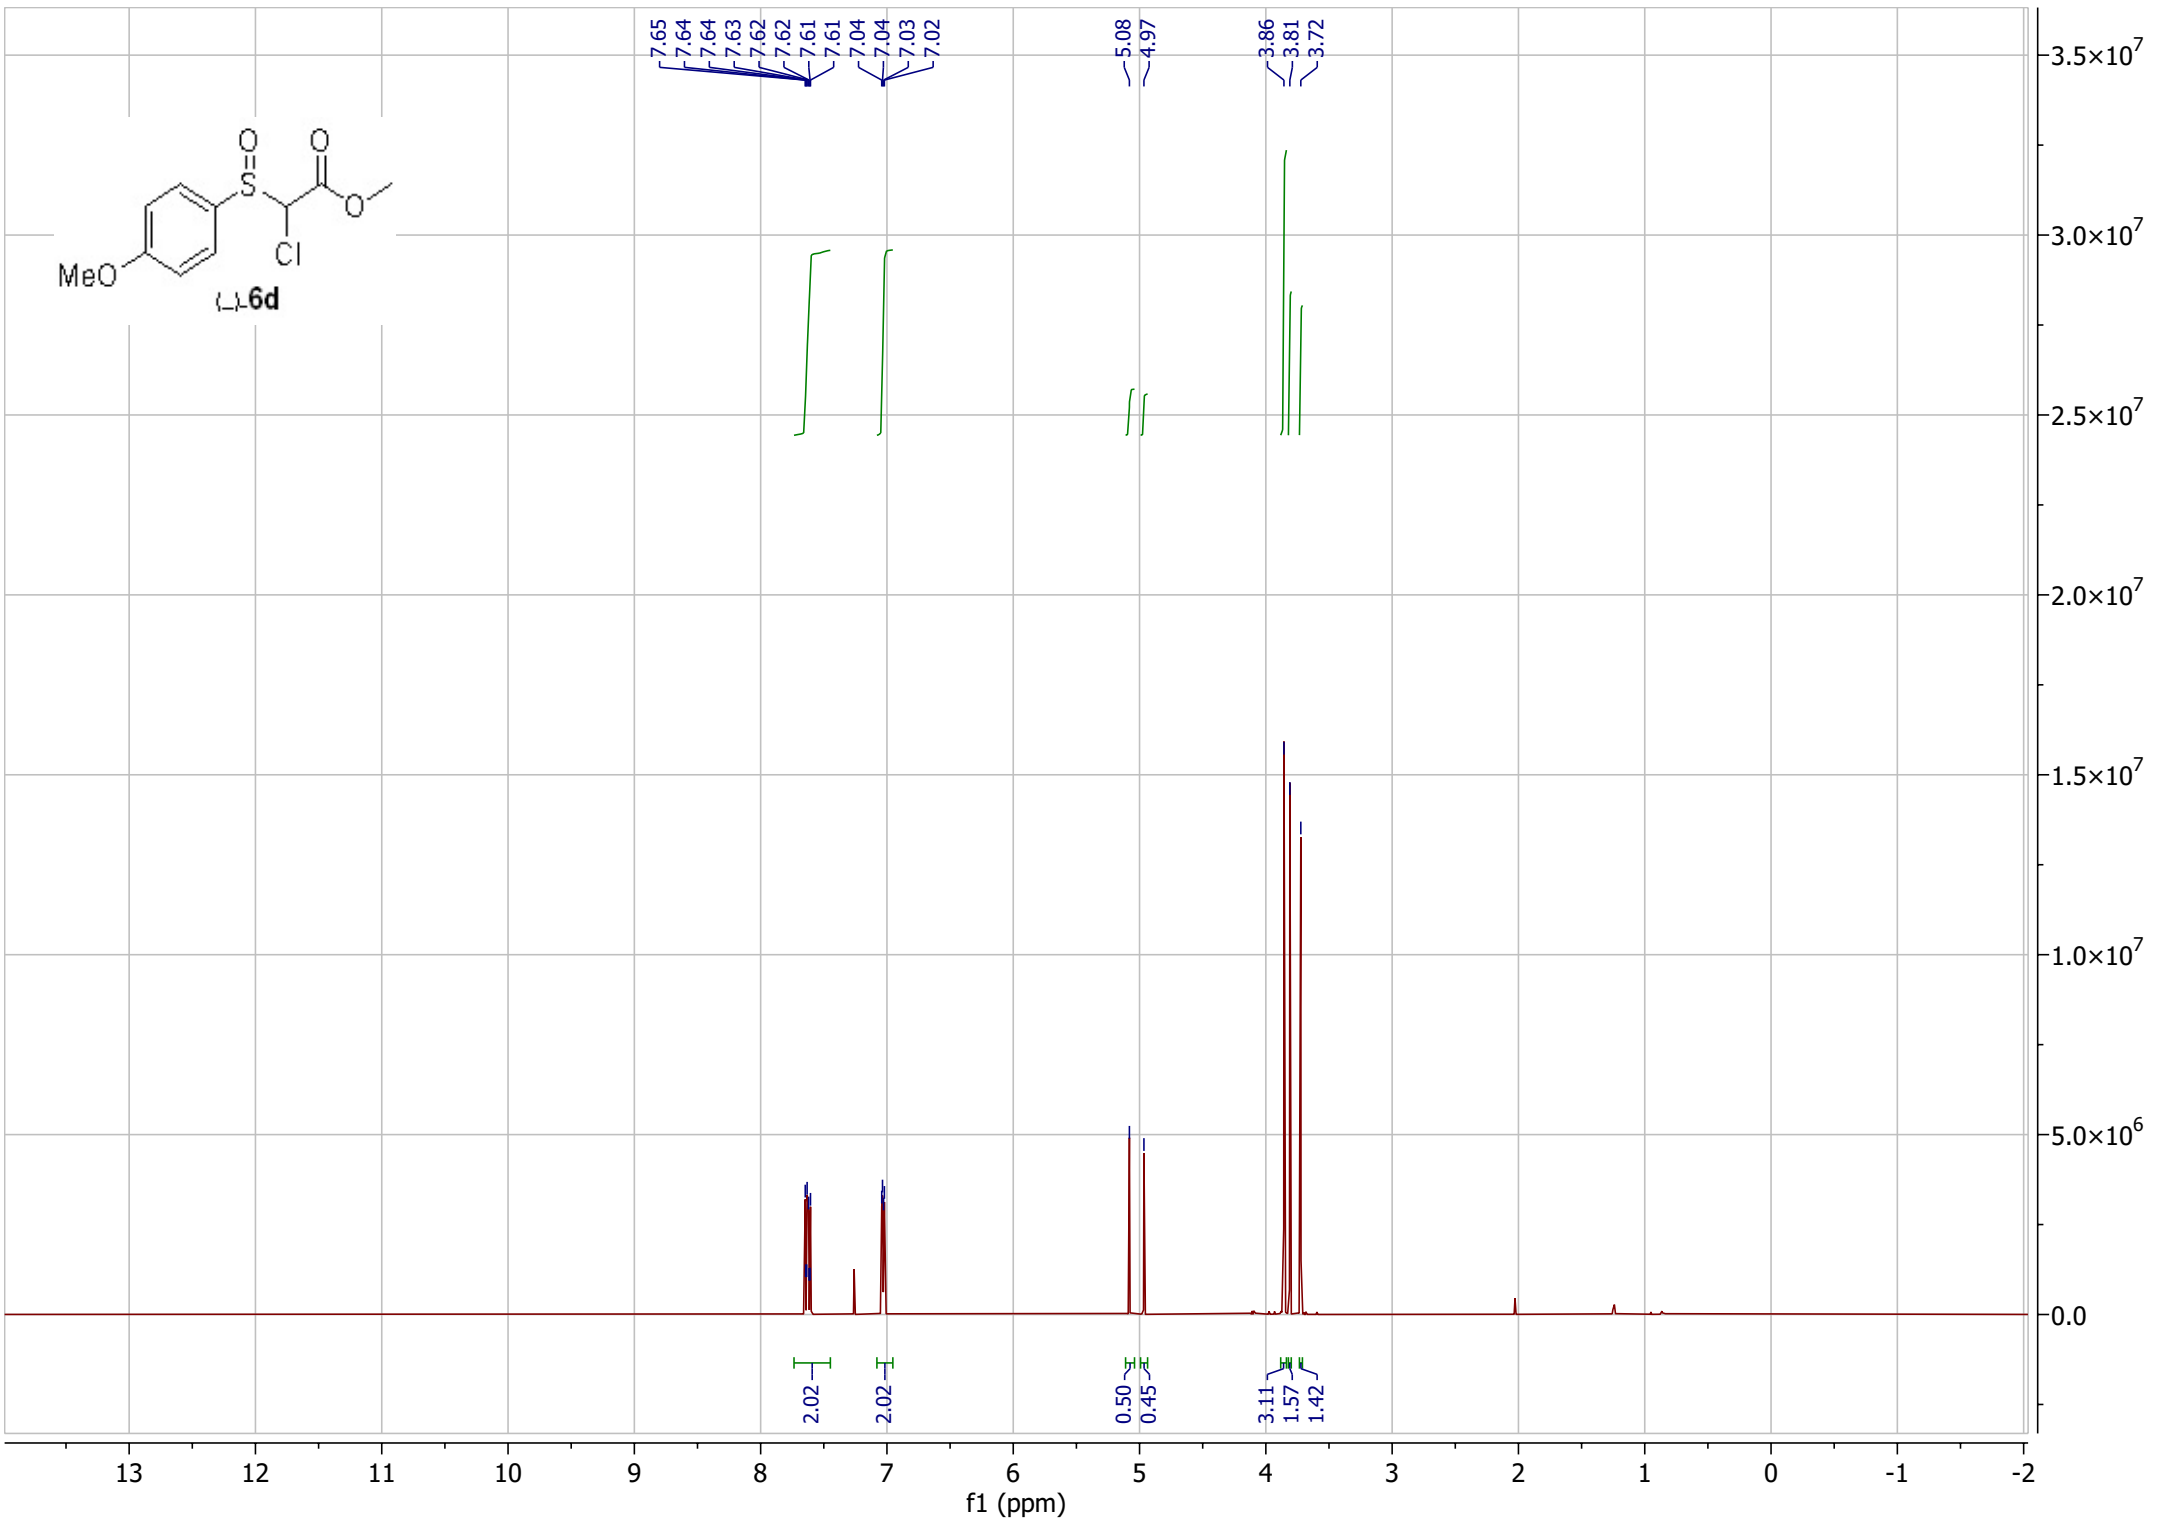

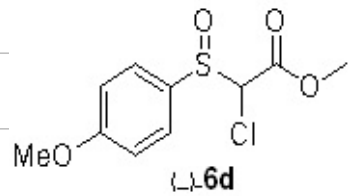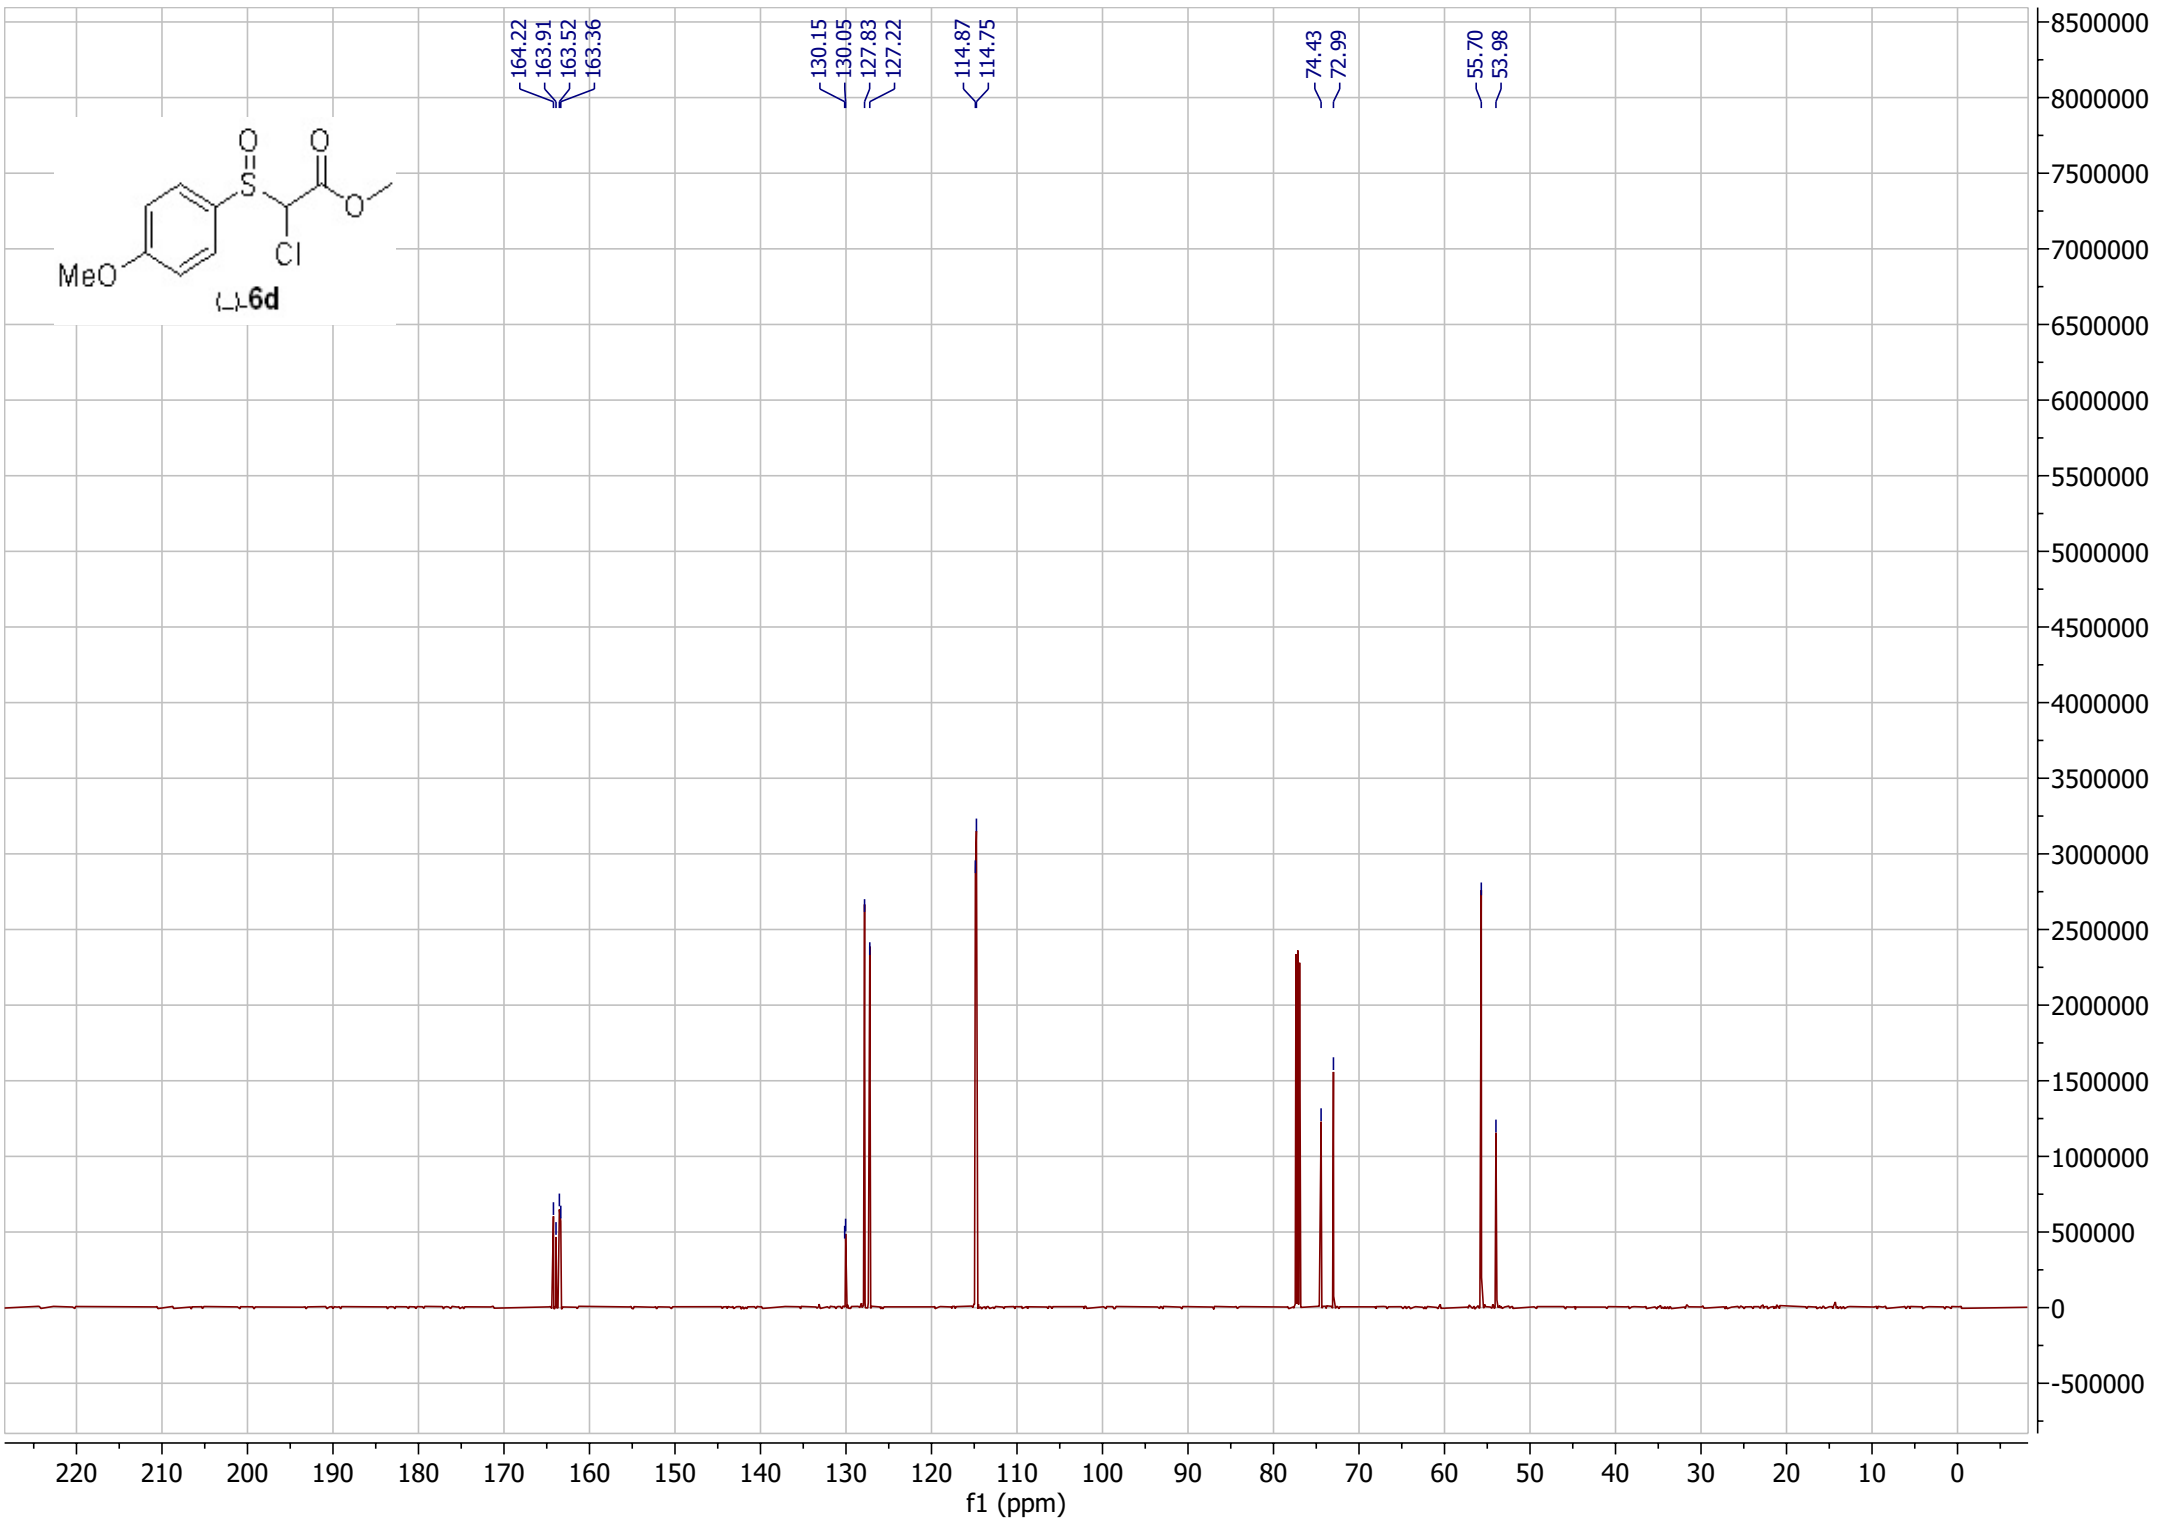



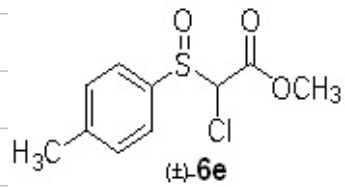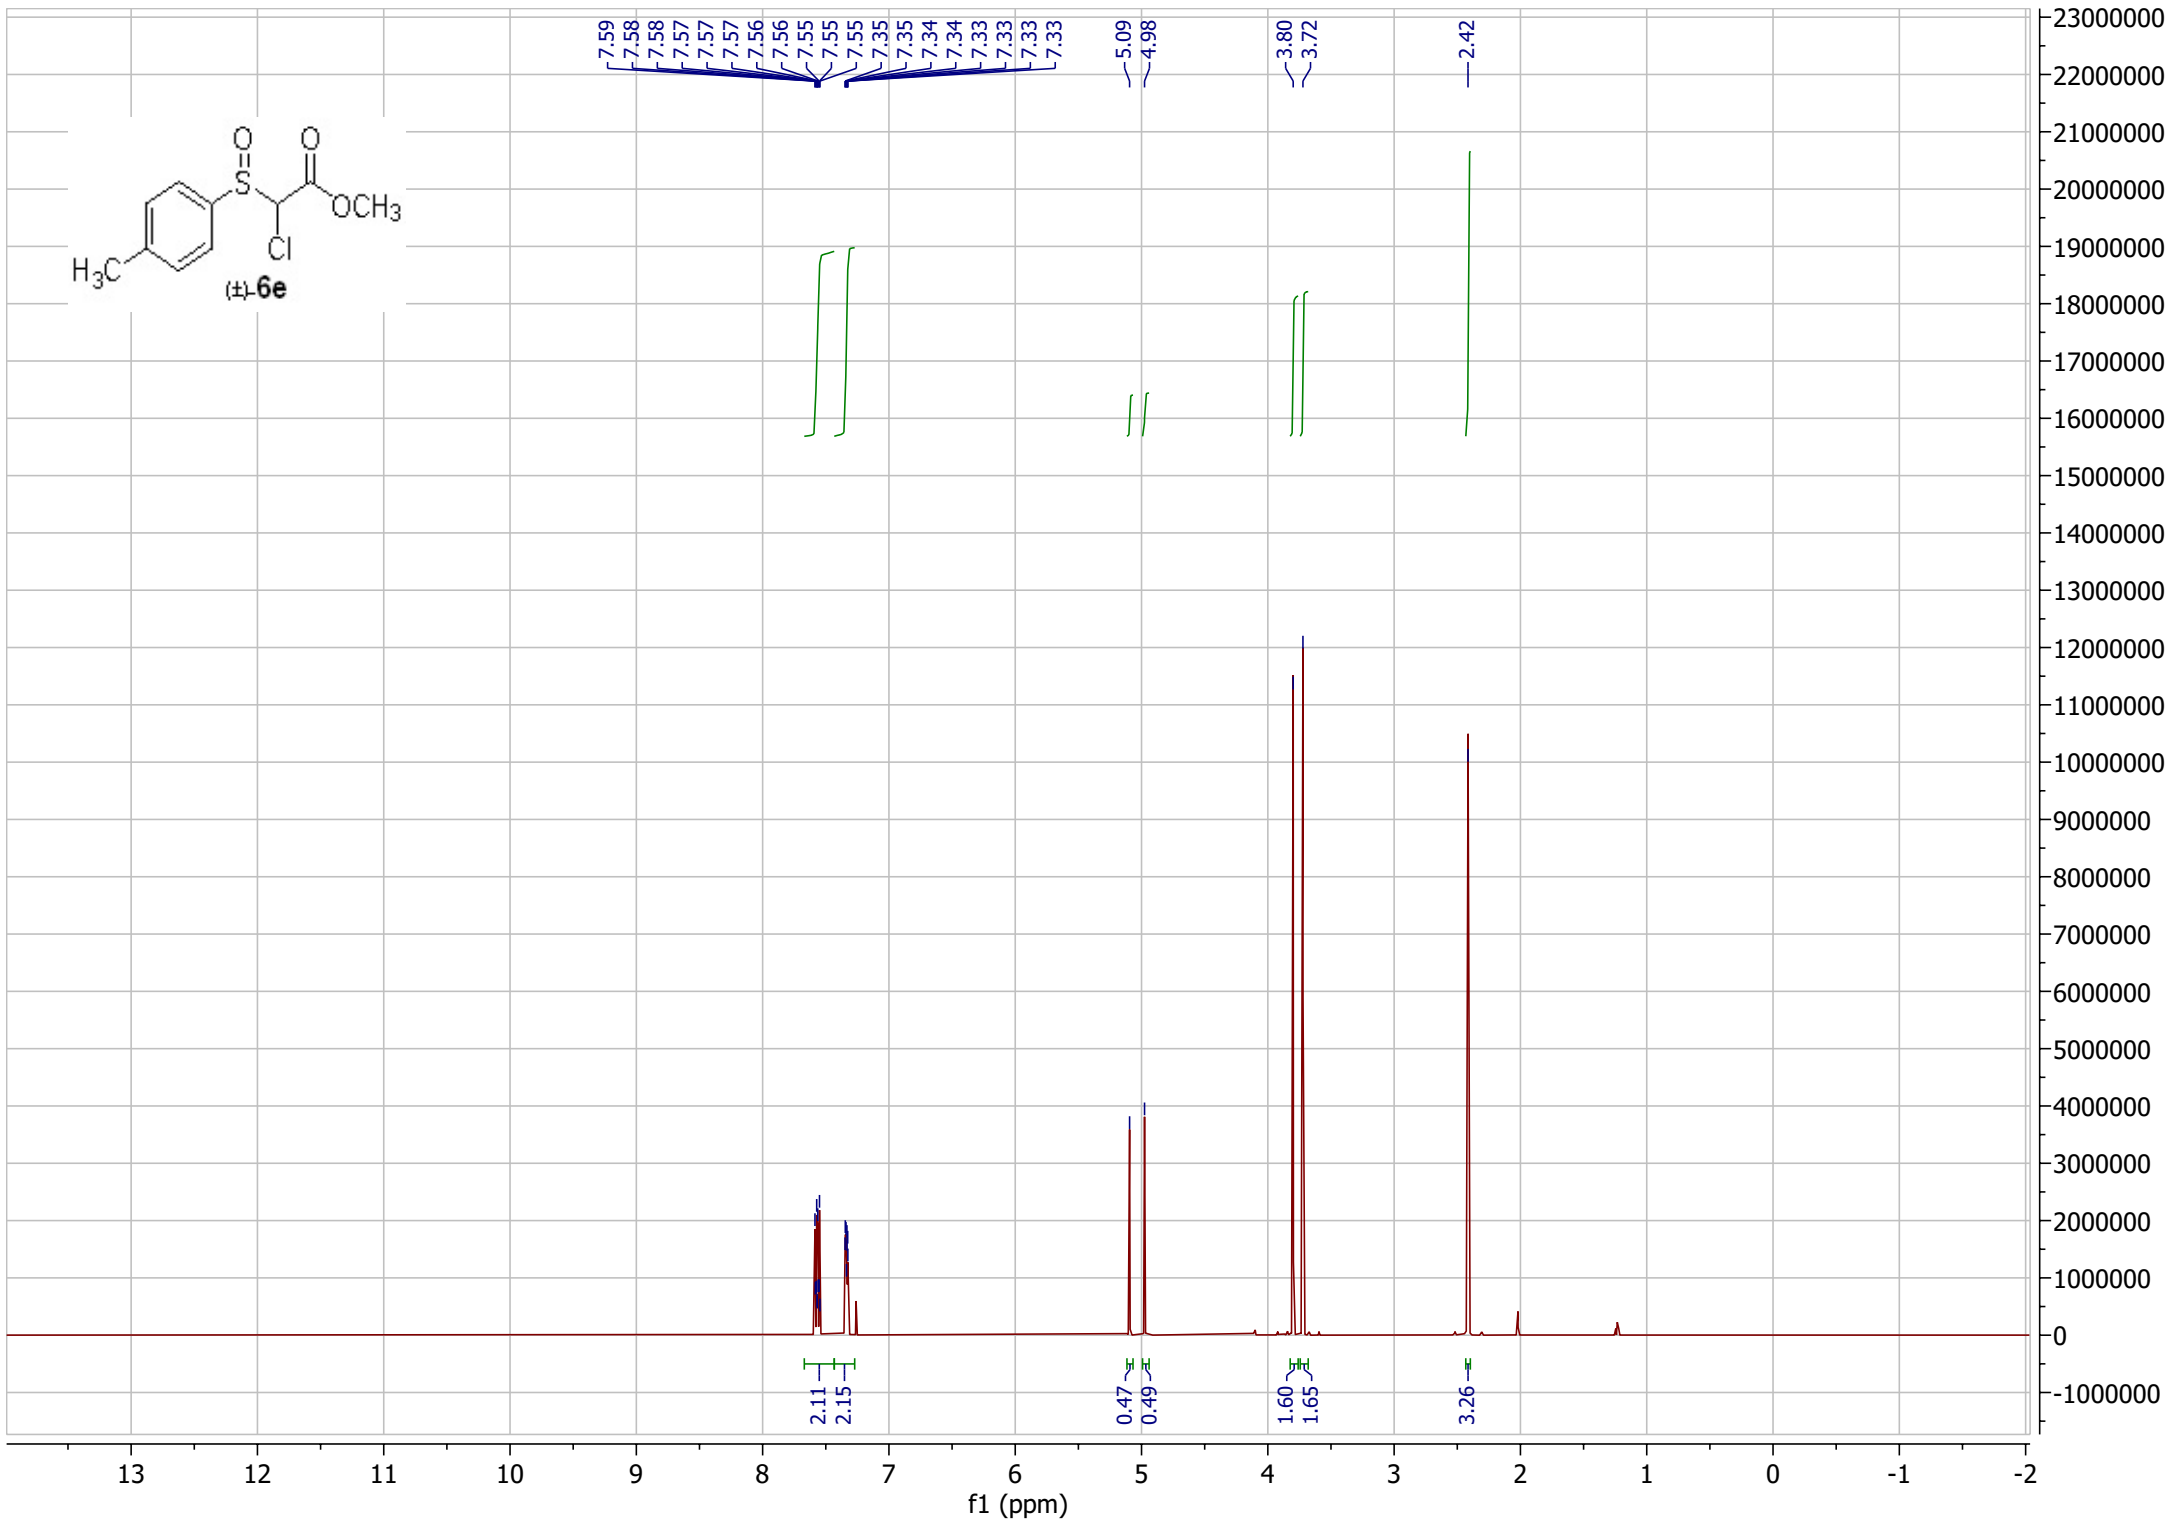

CARBON\_01

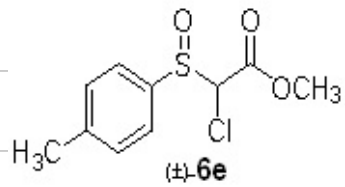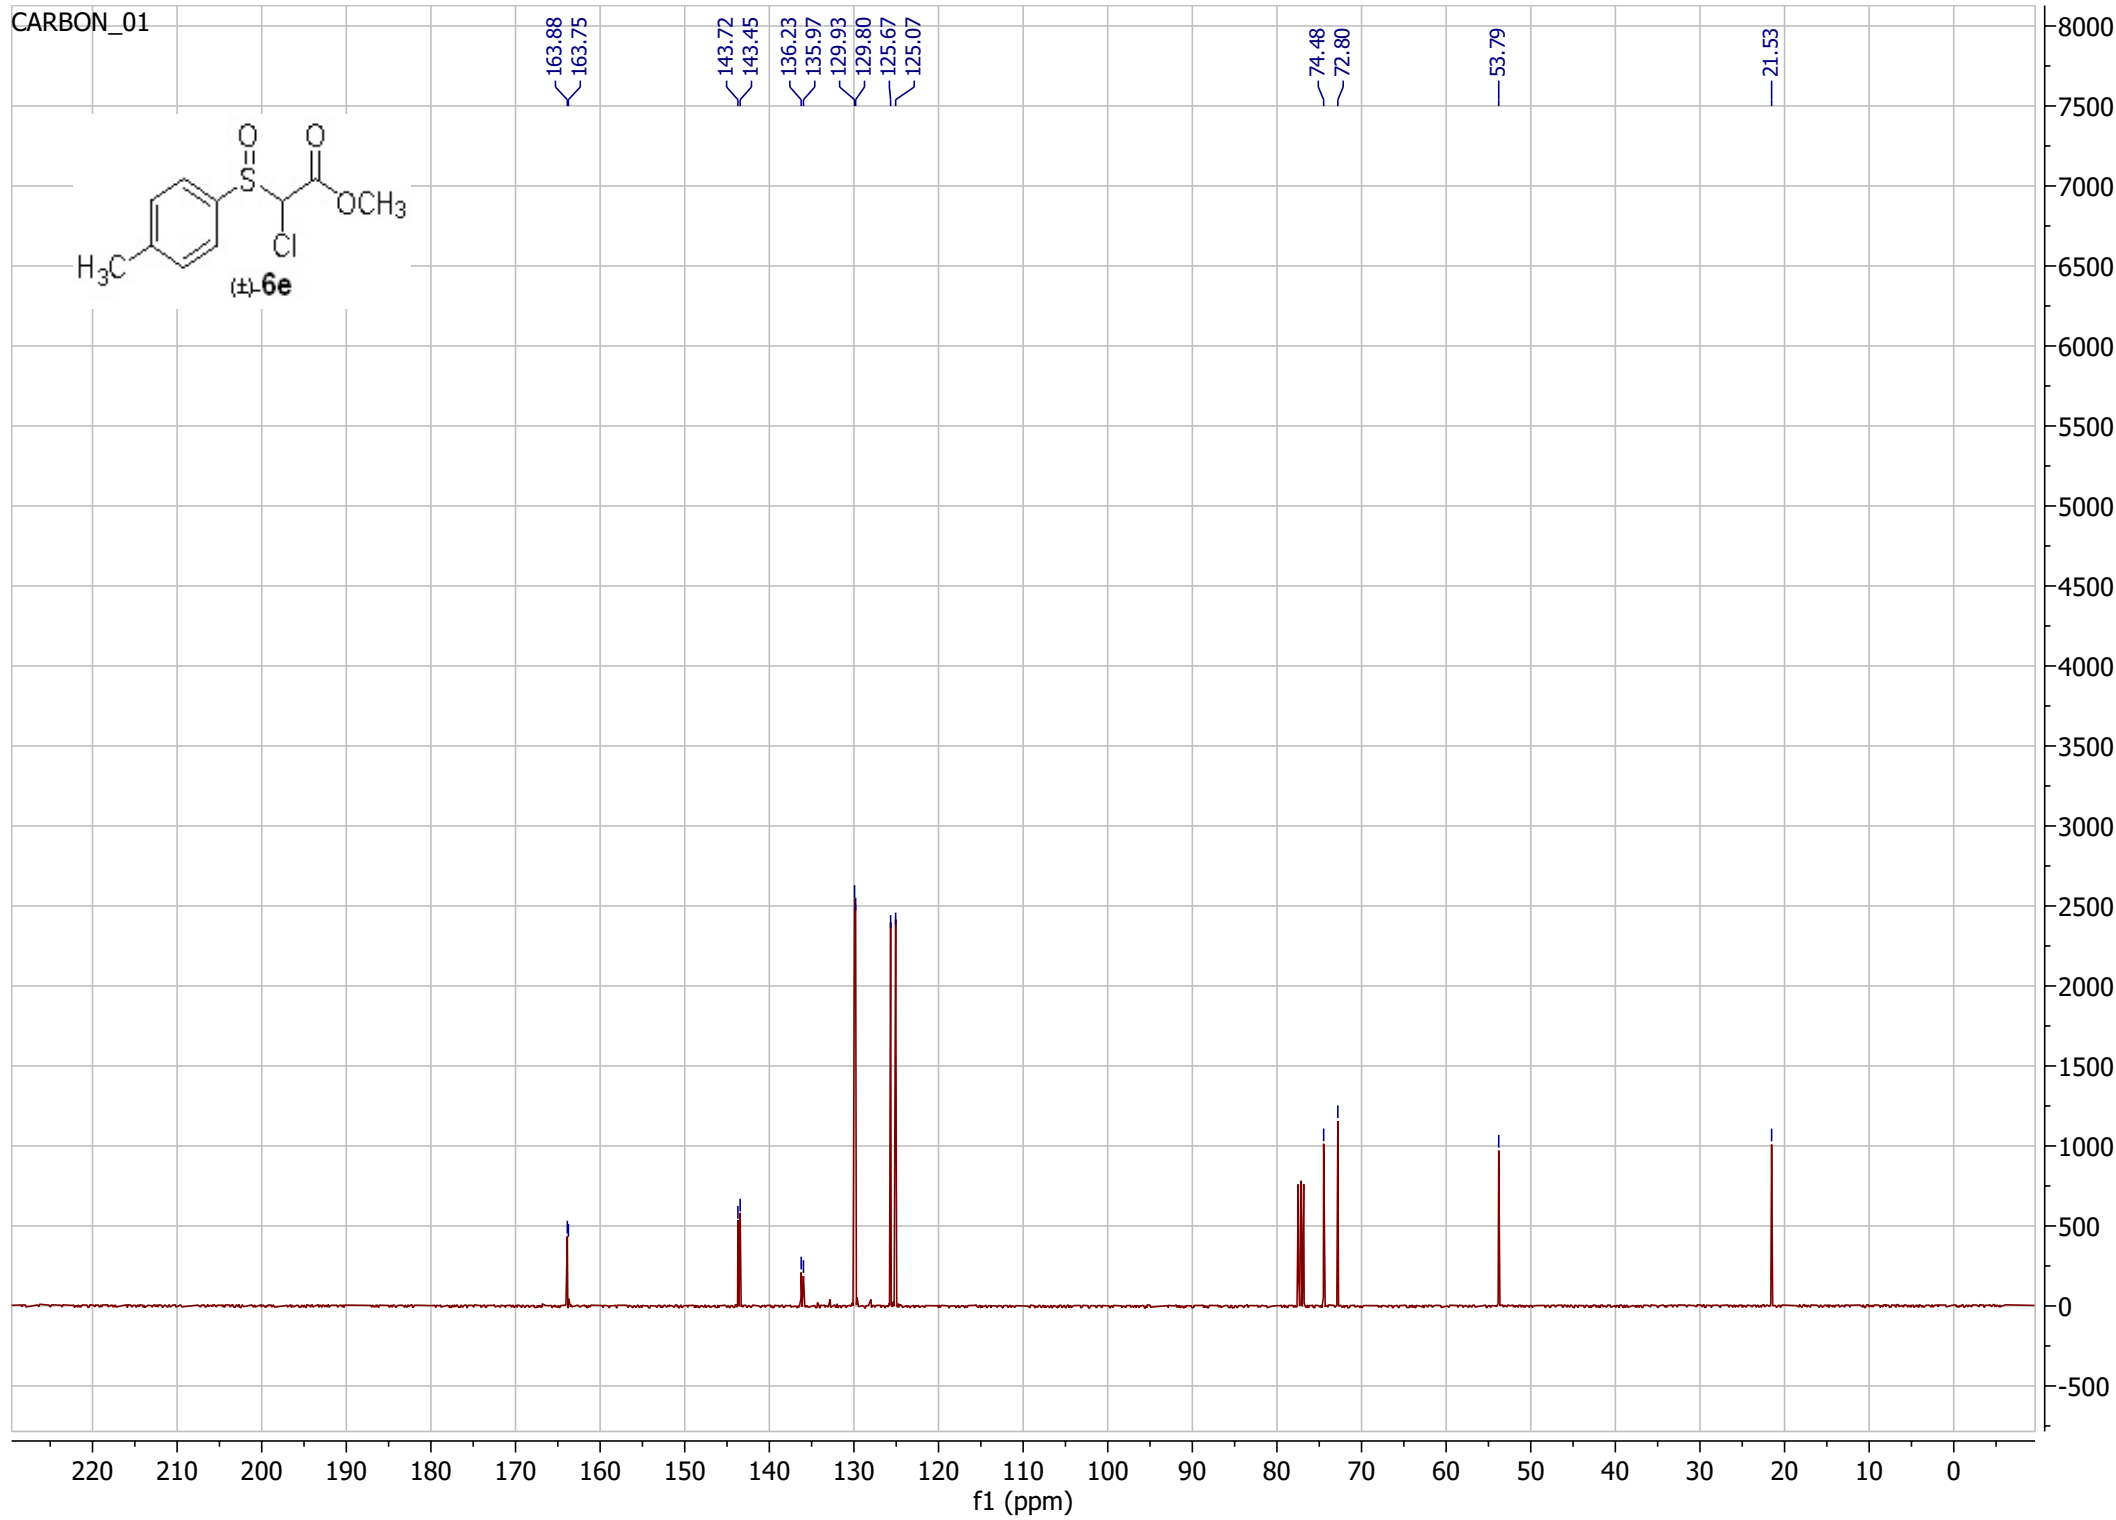

PROTON\_01

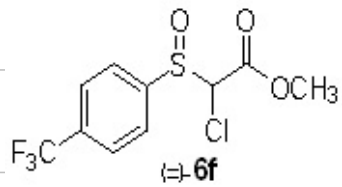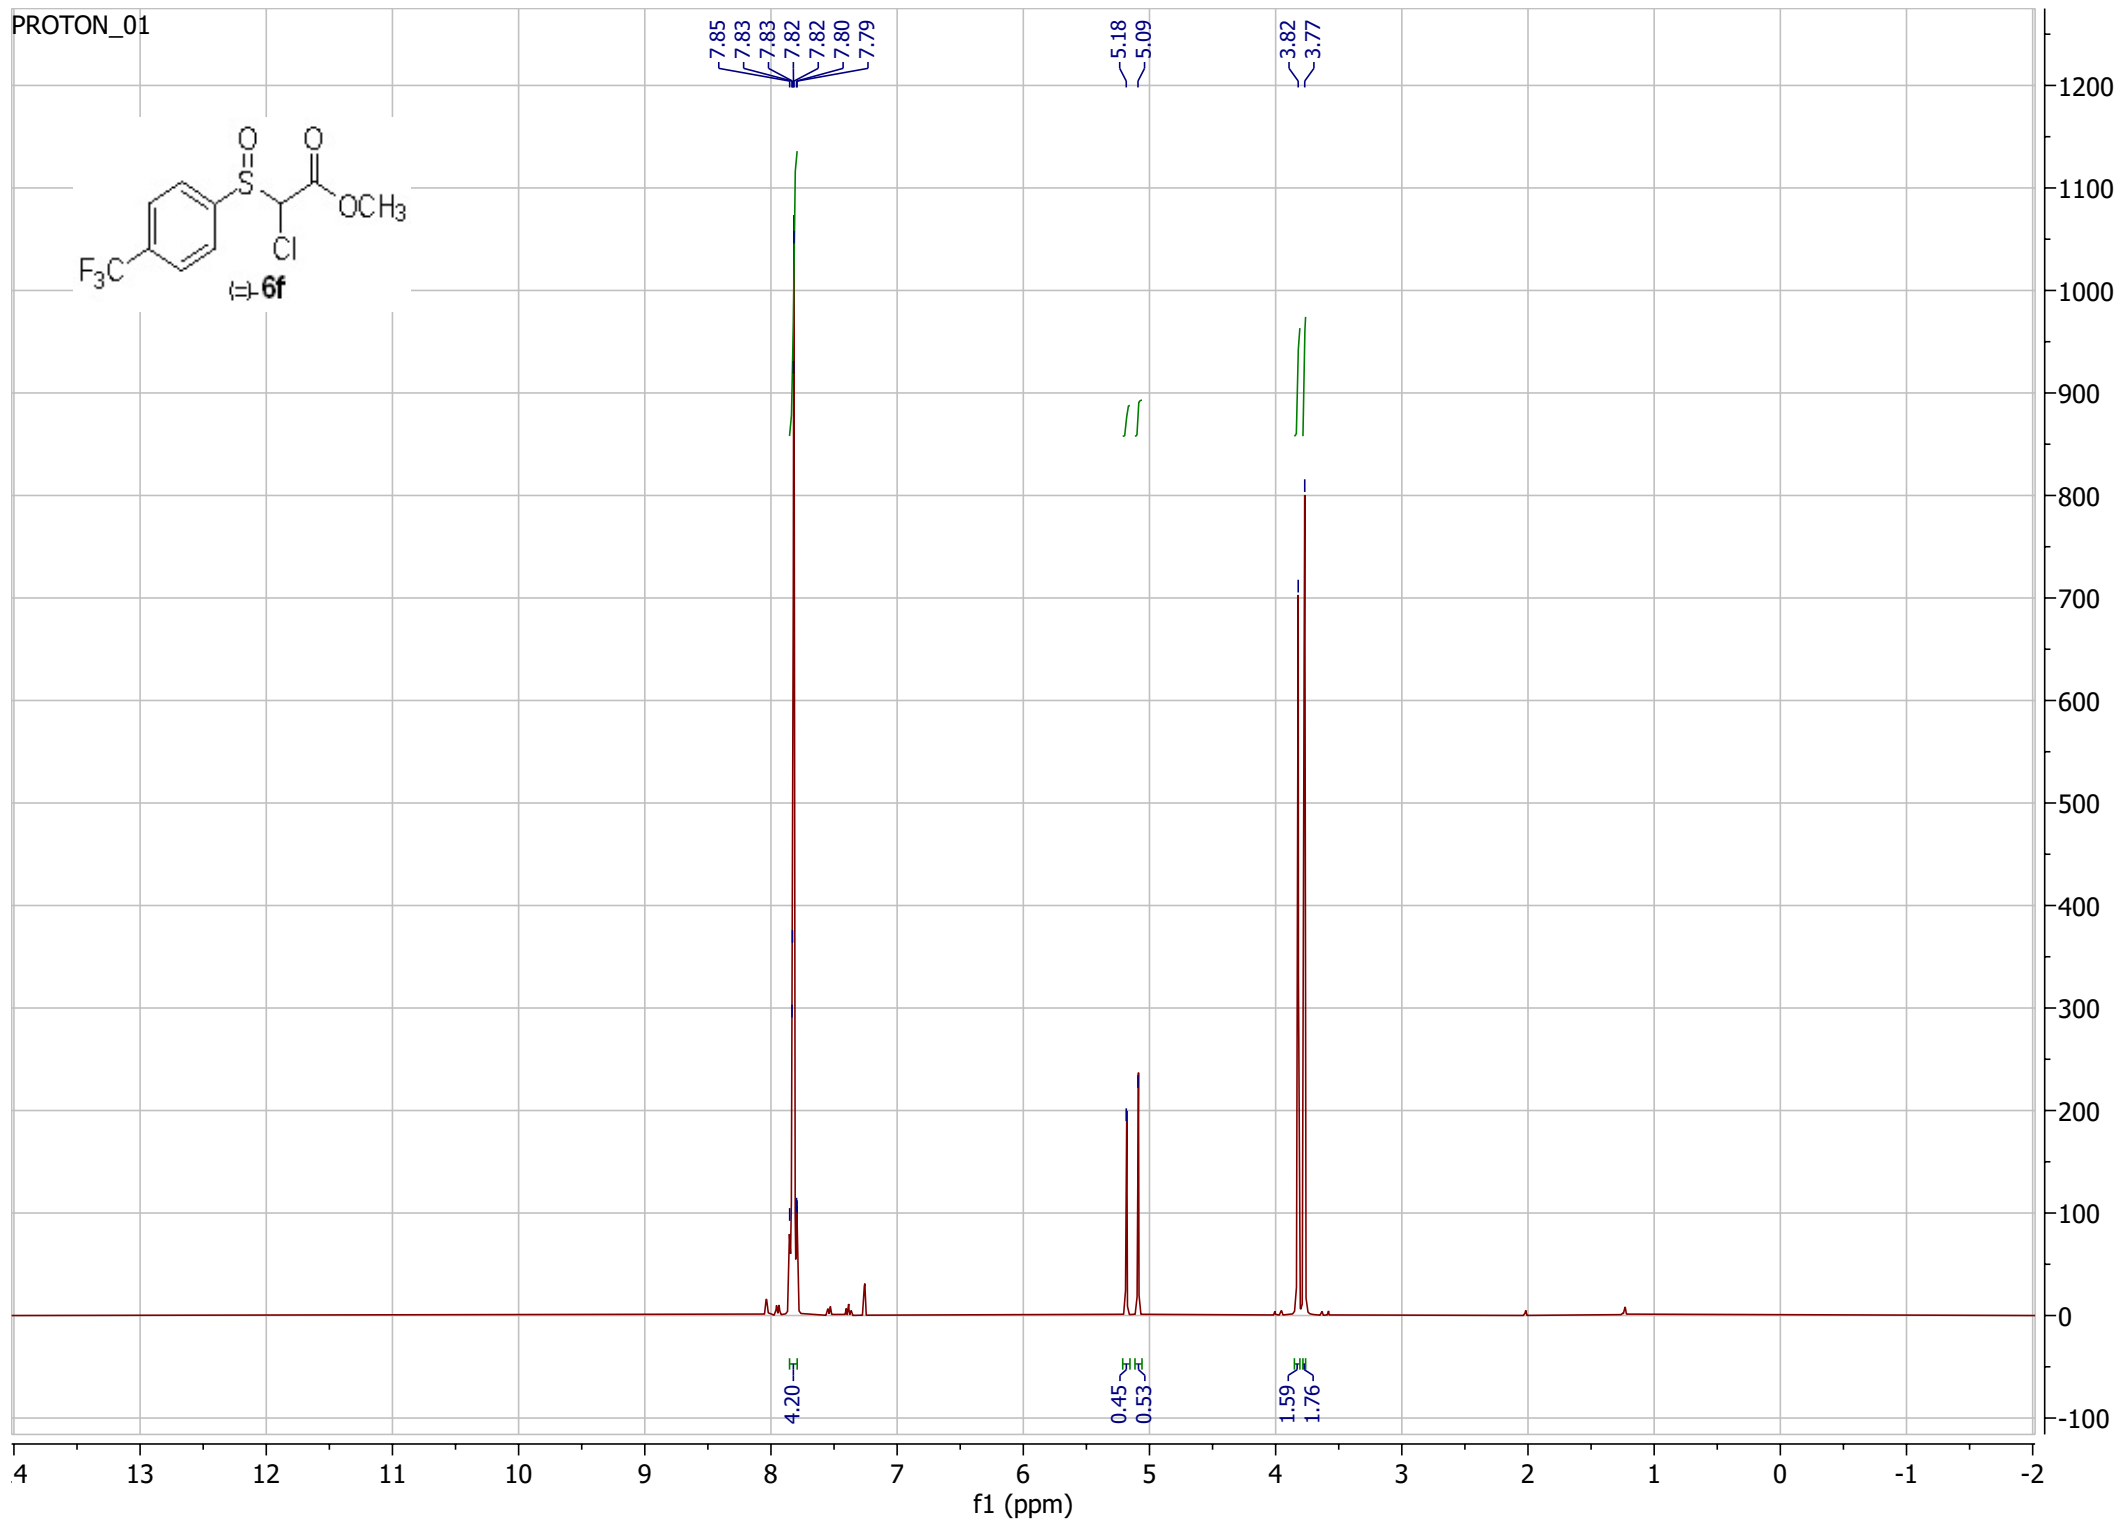

CARBON\_01

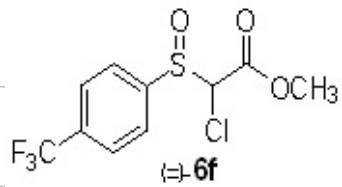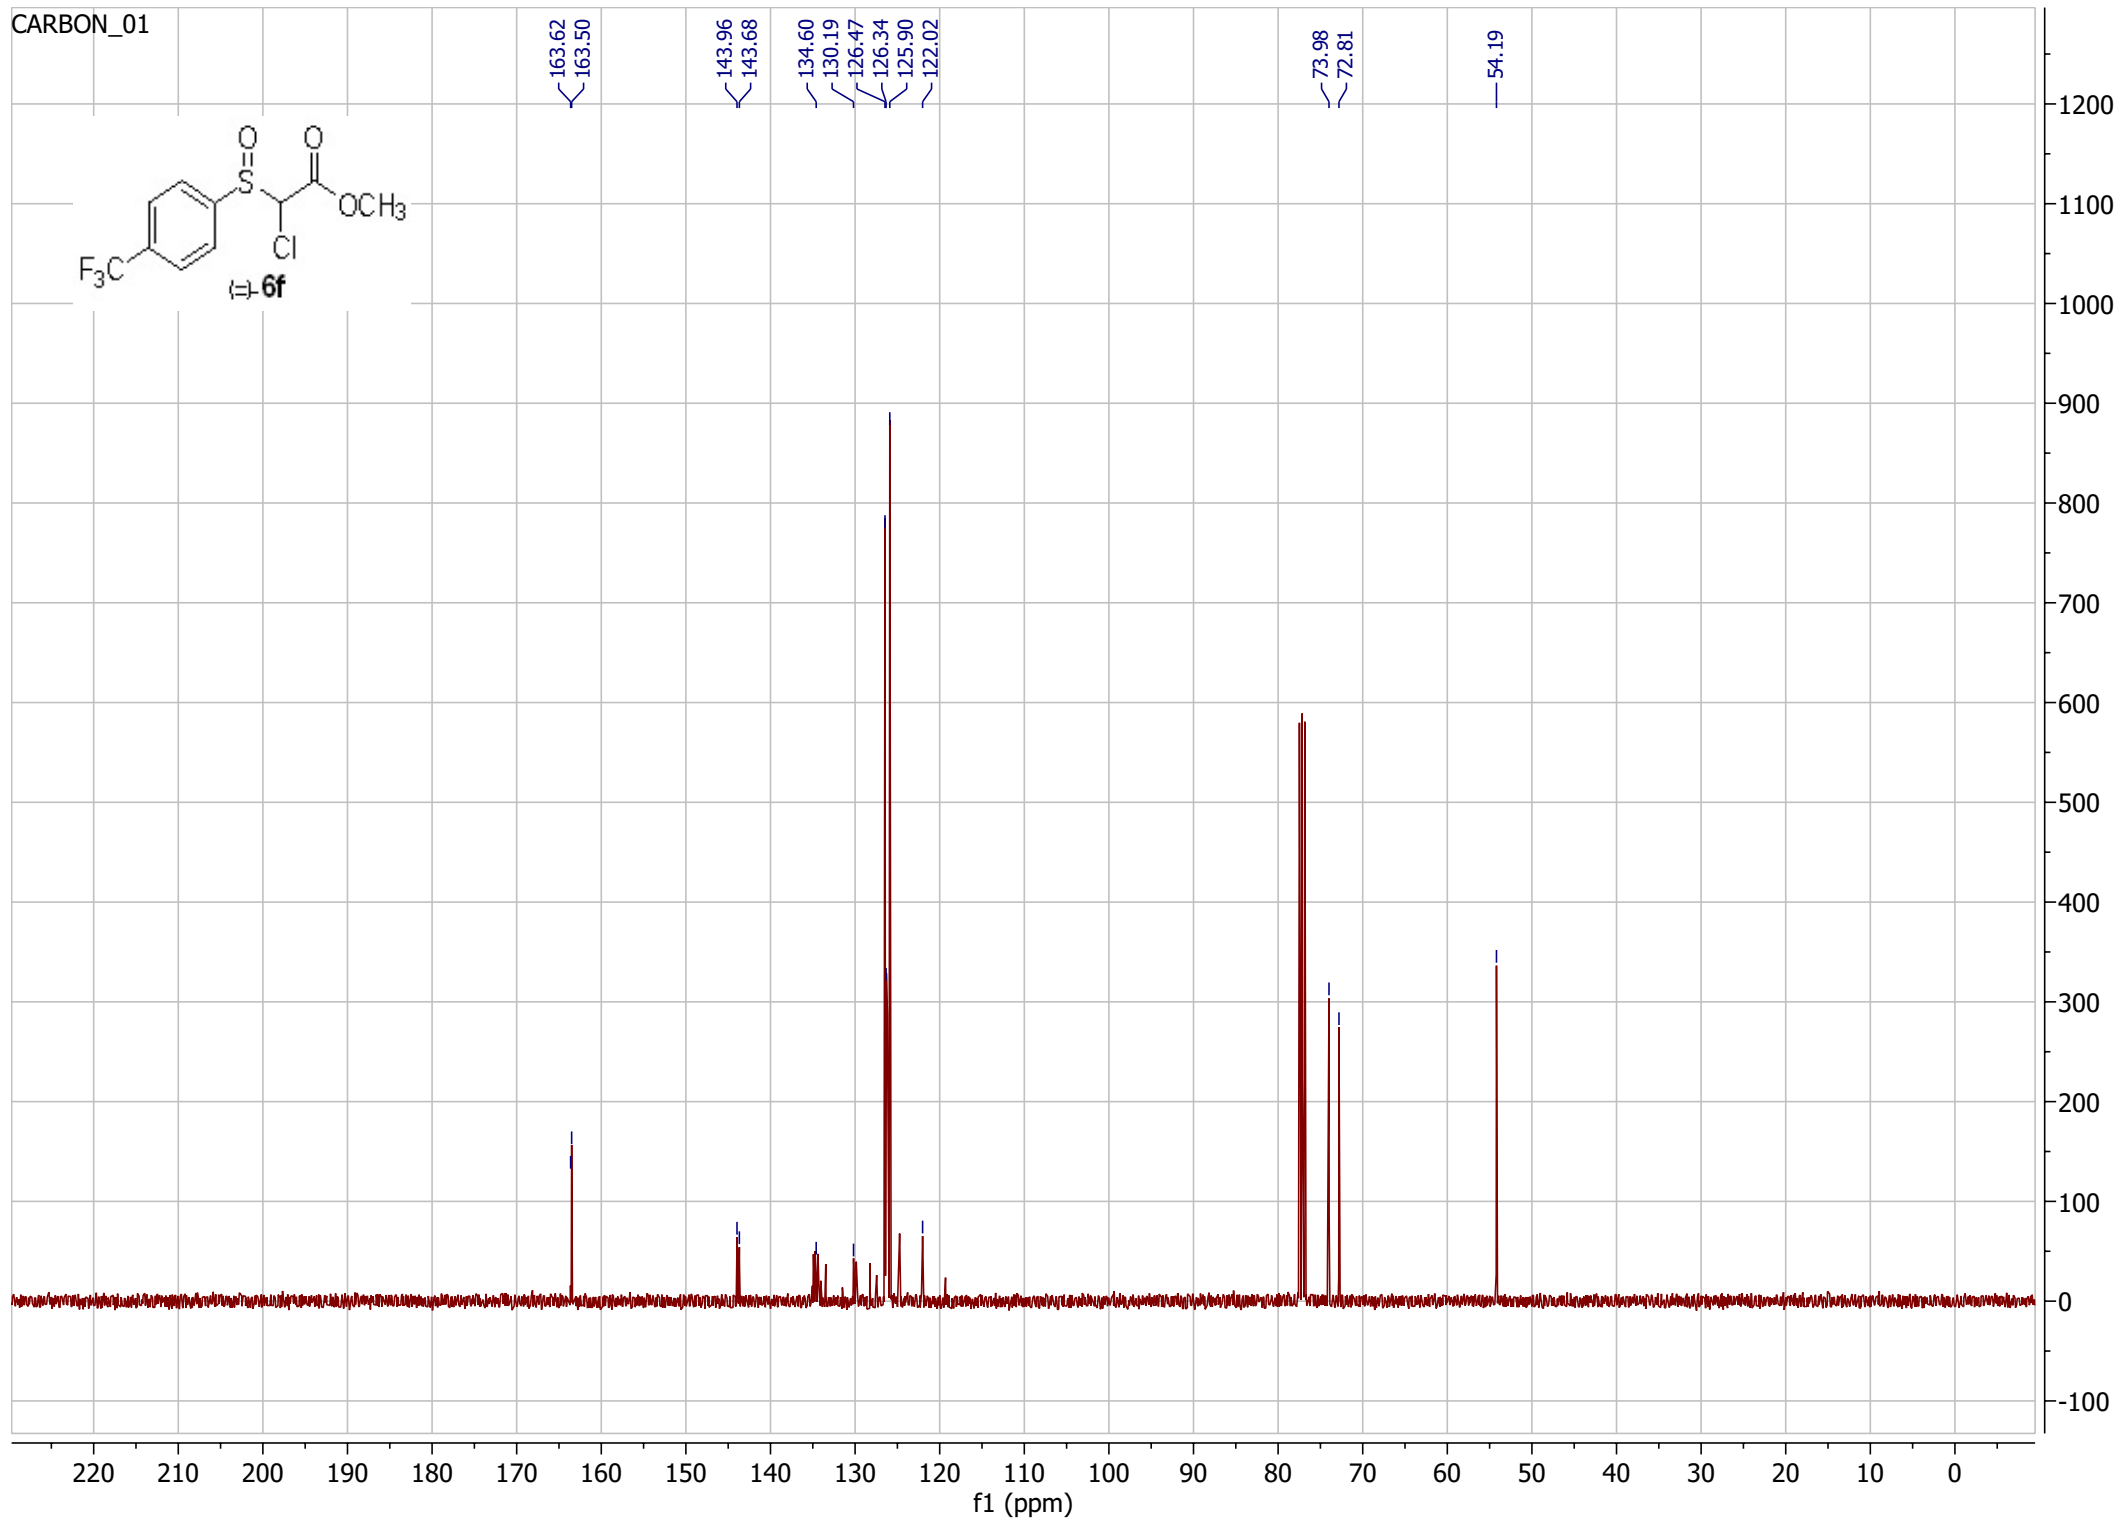

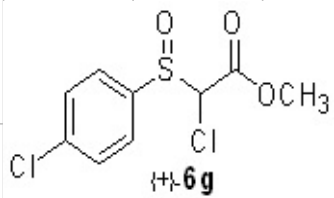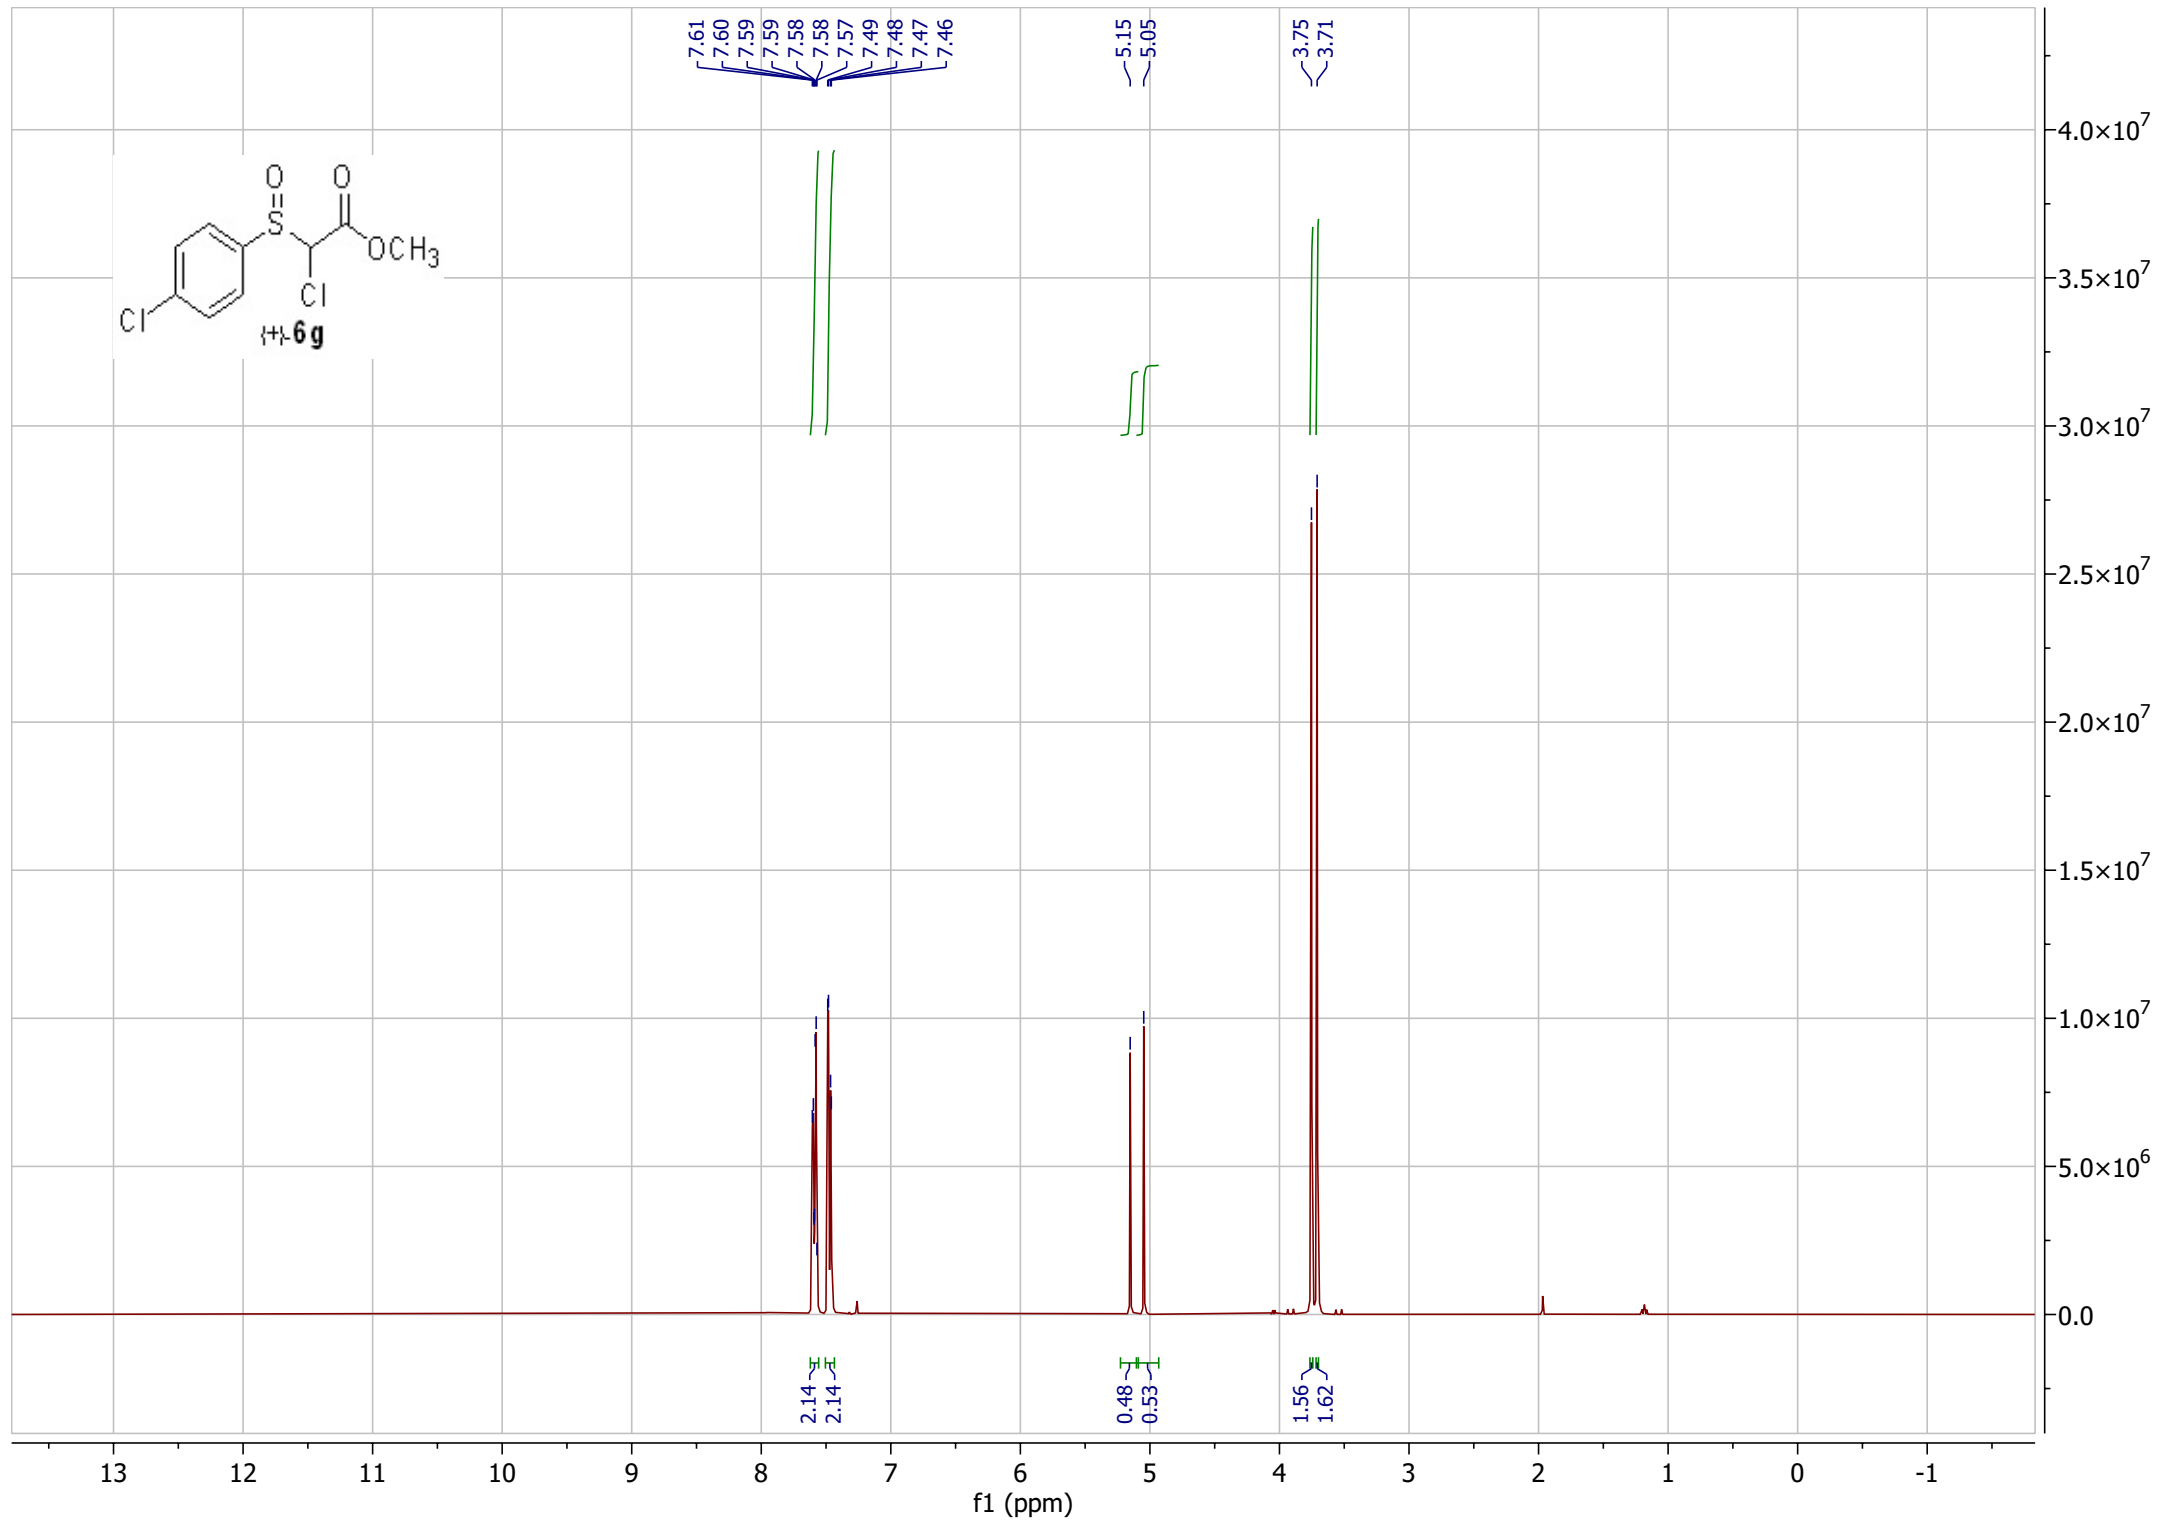

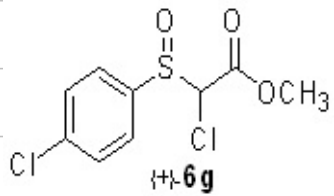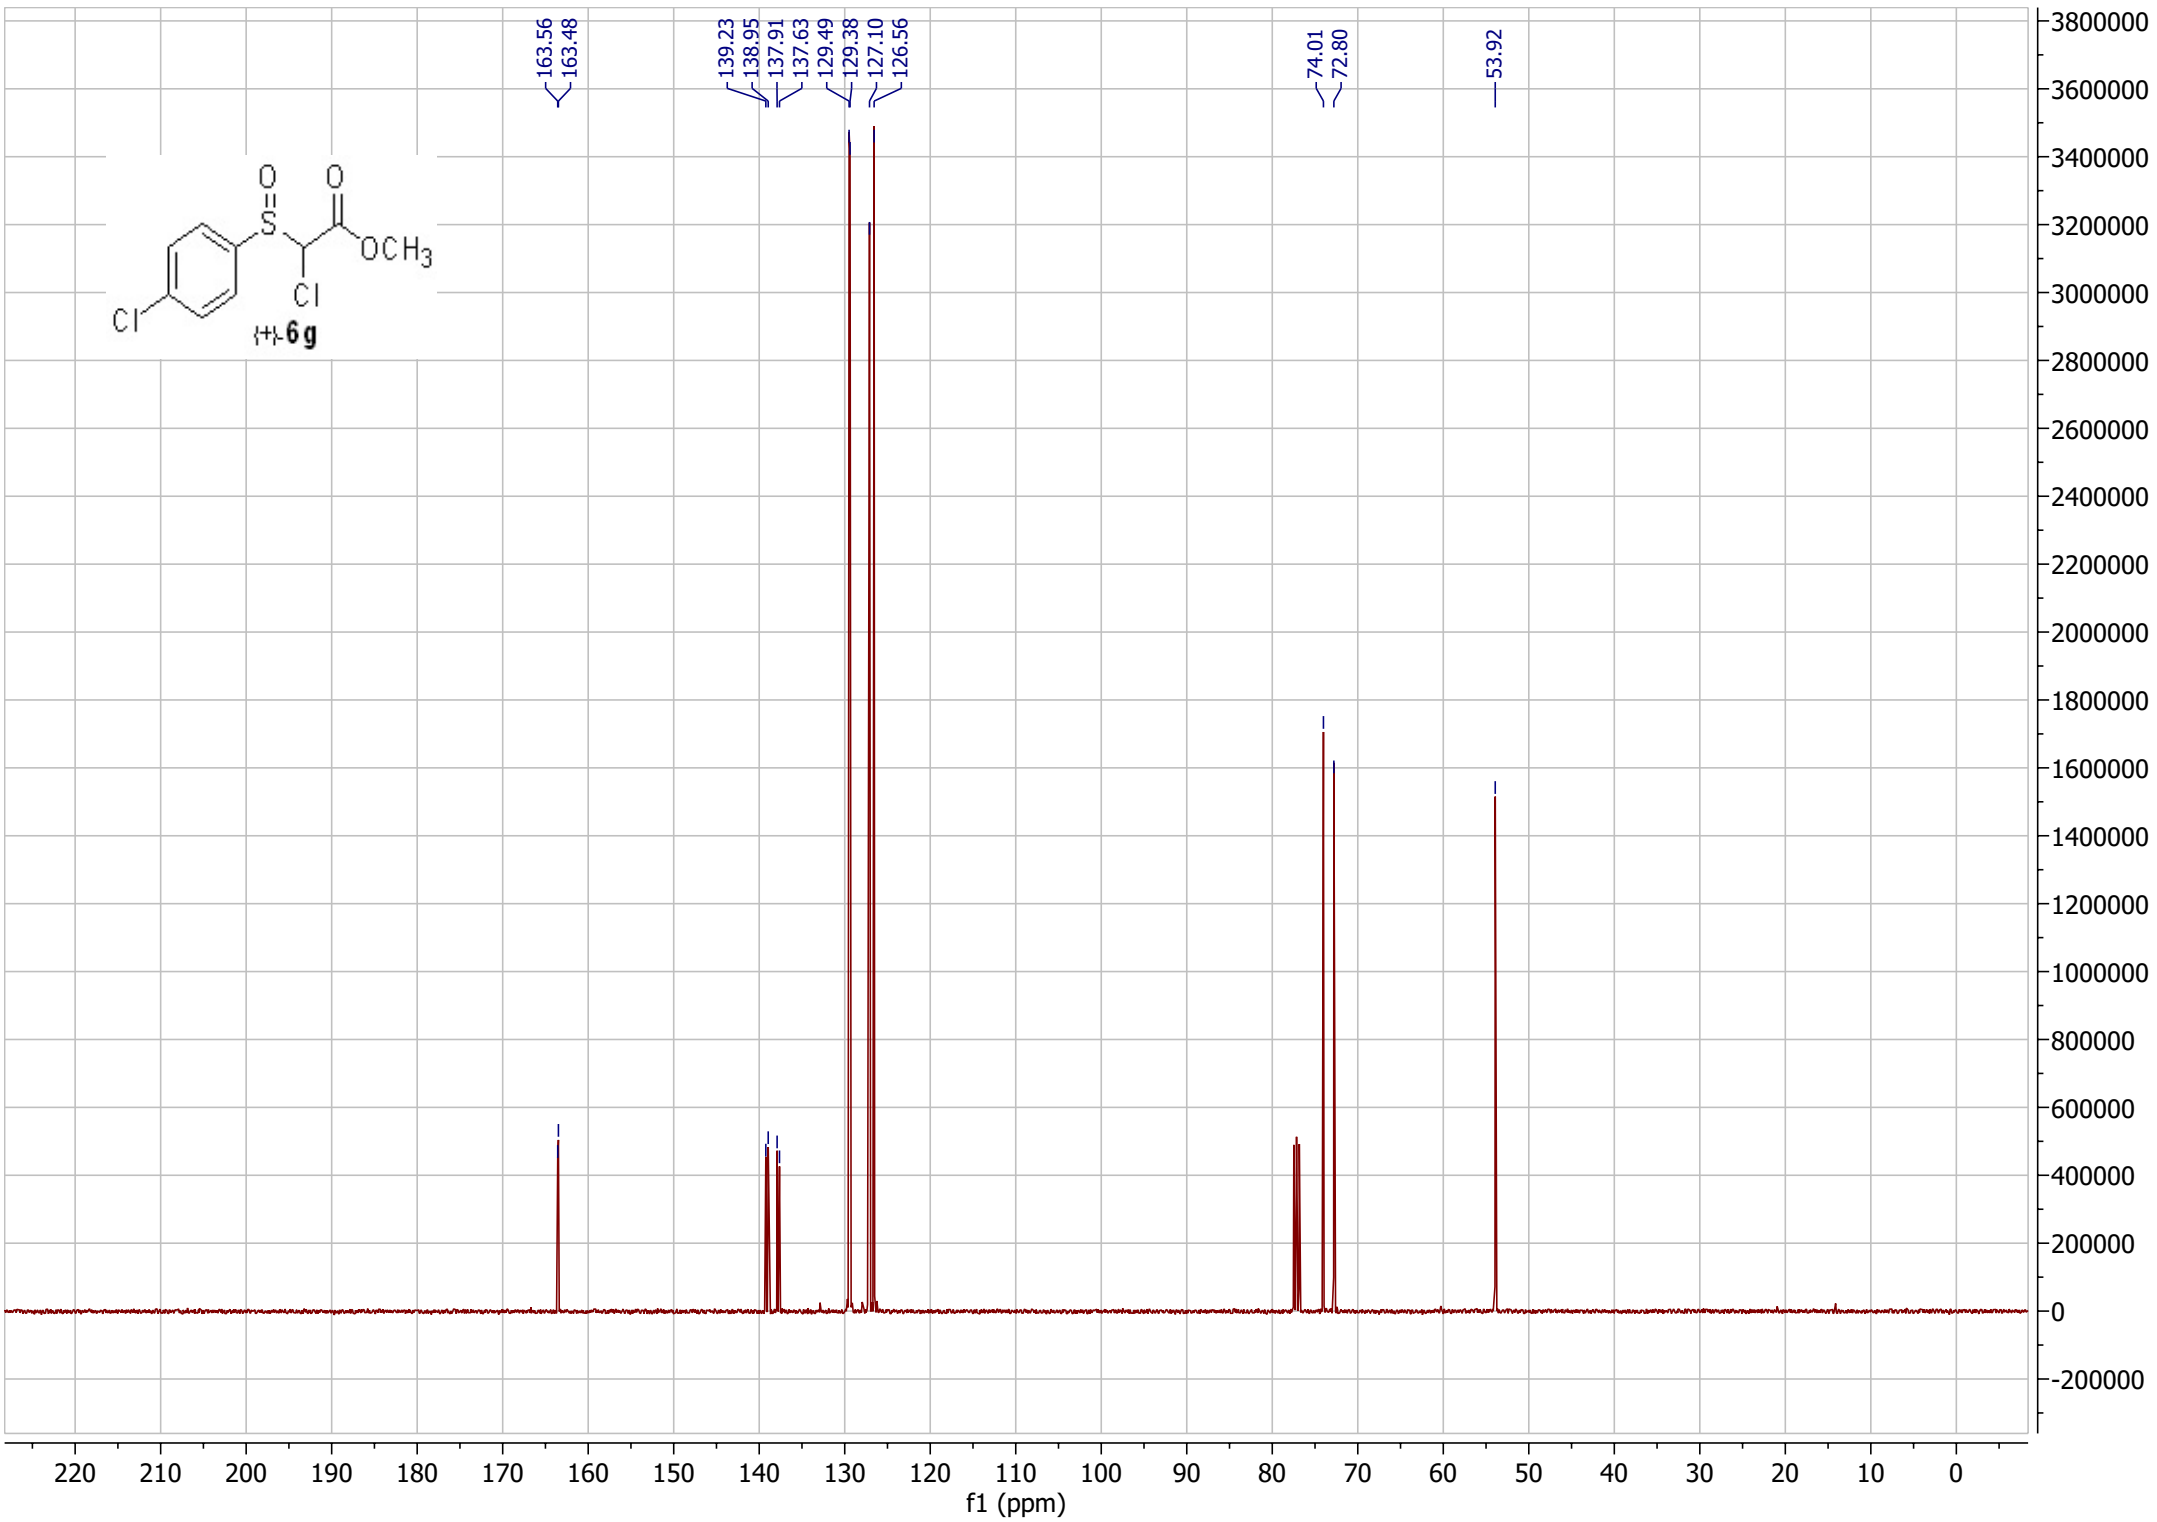

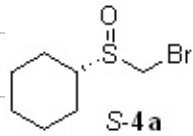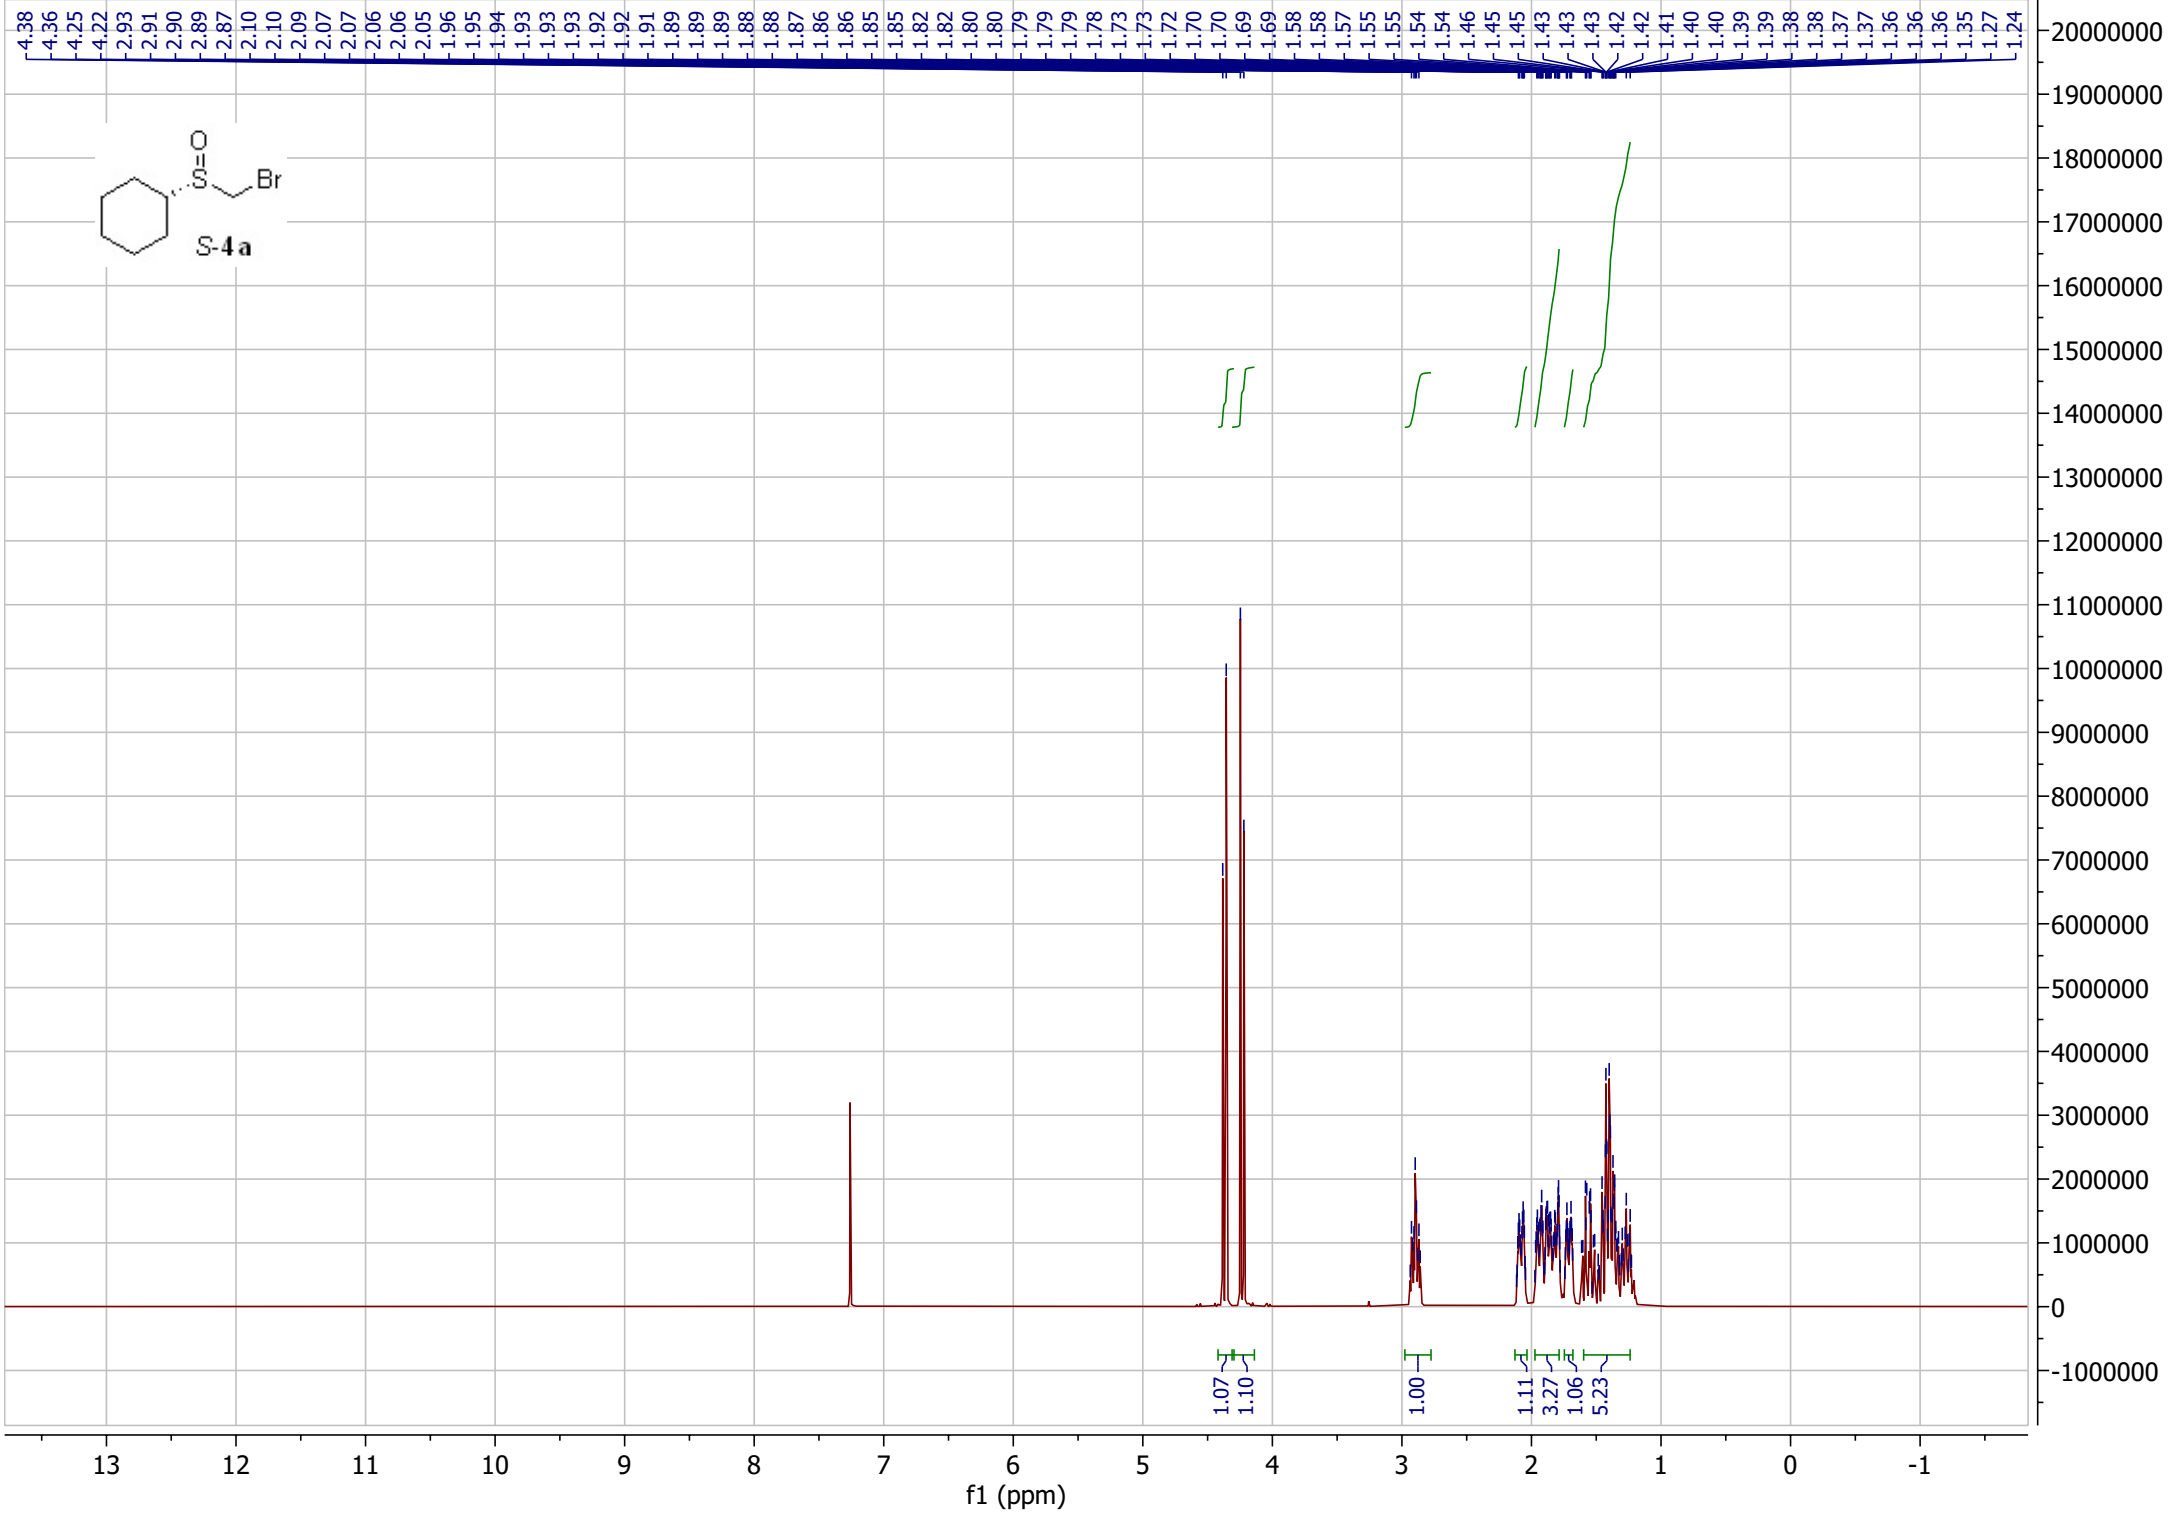

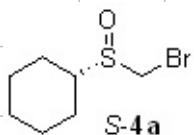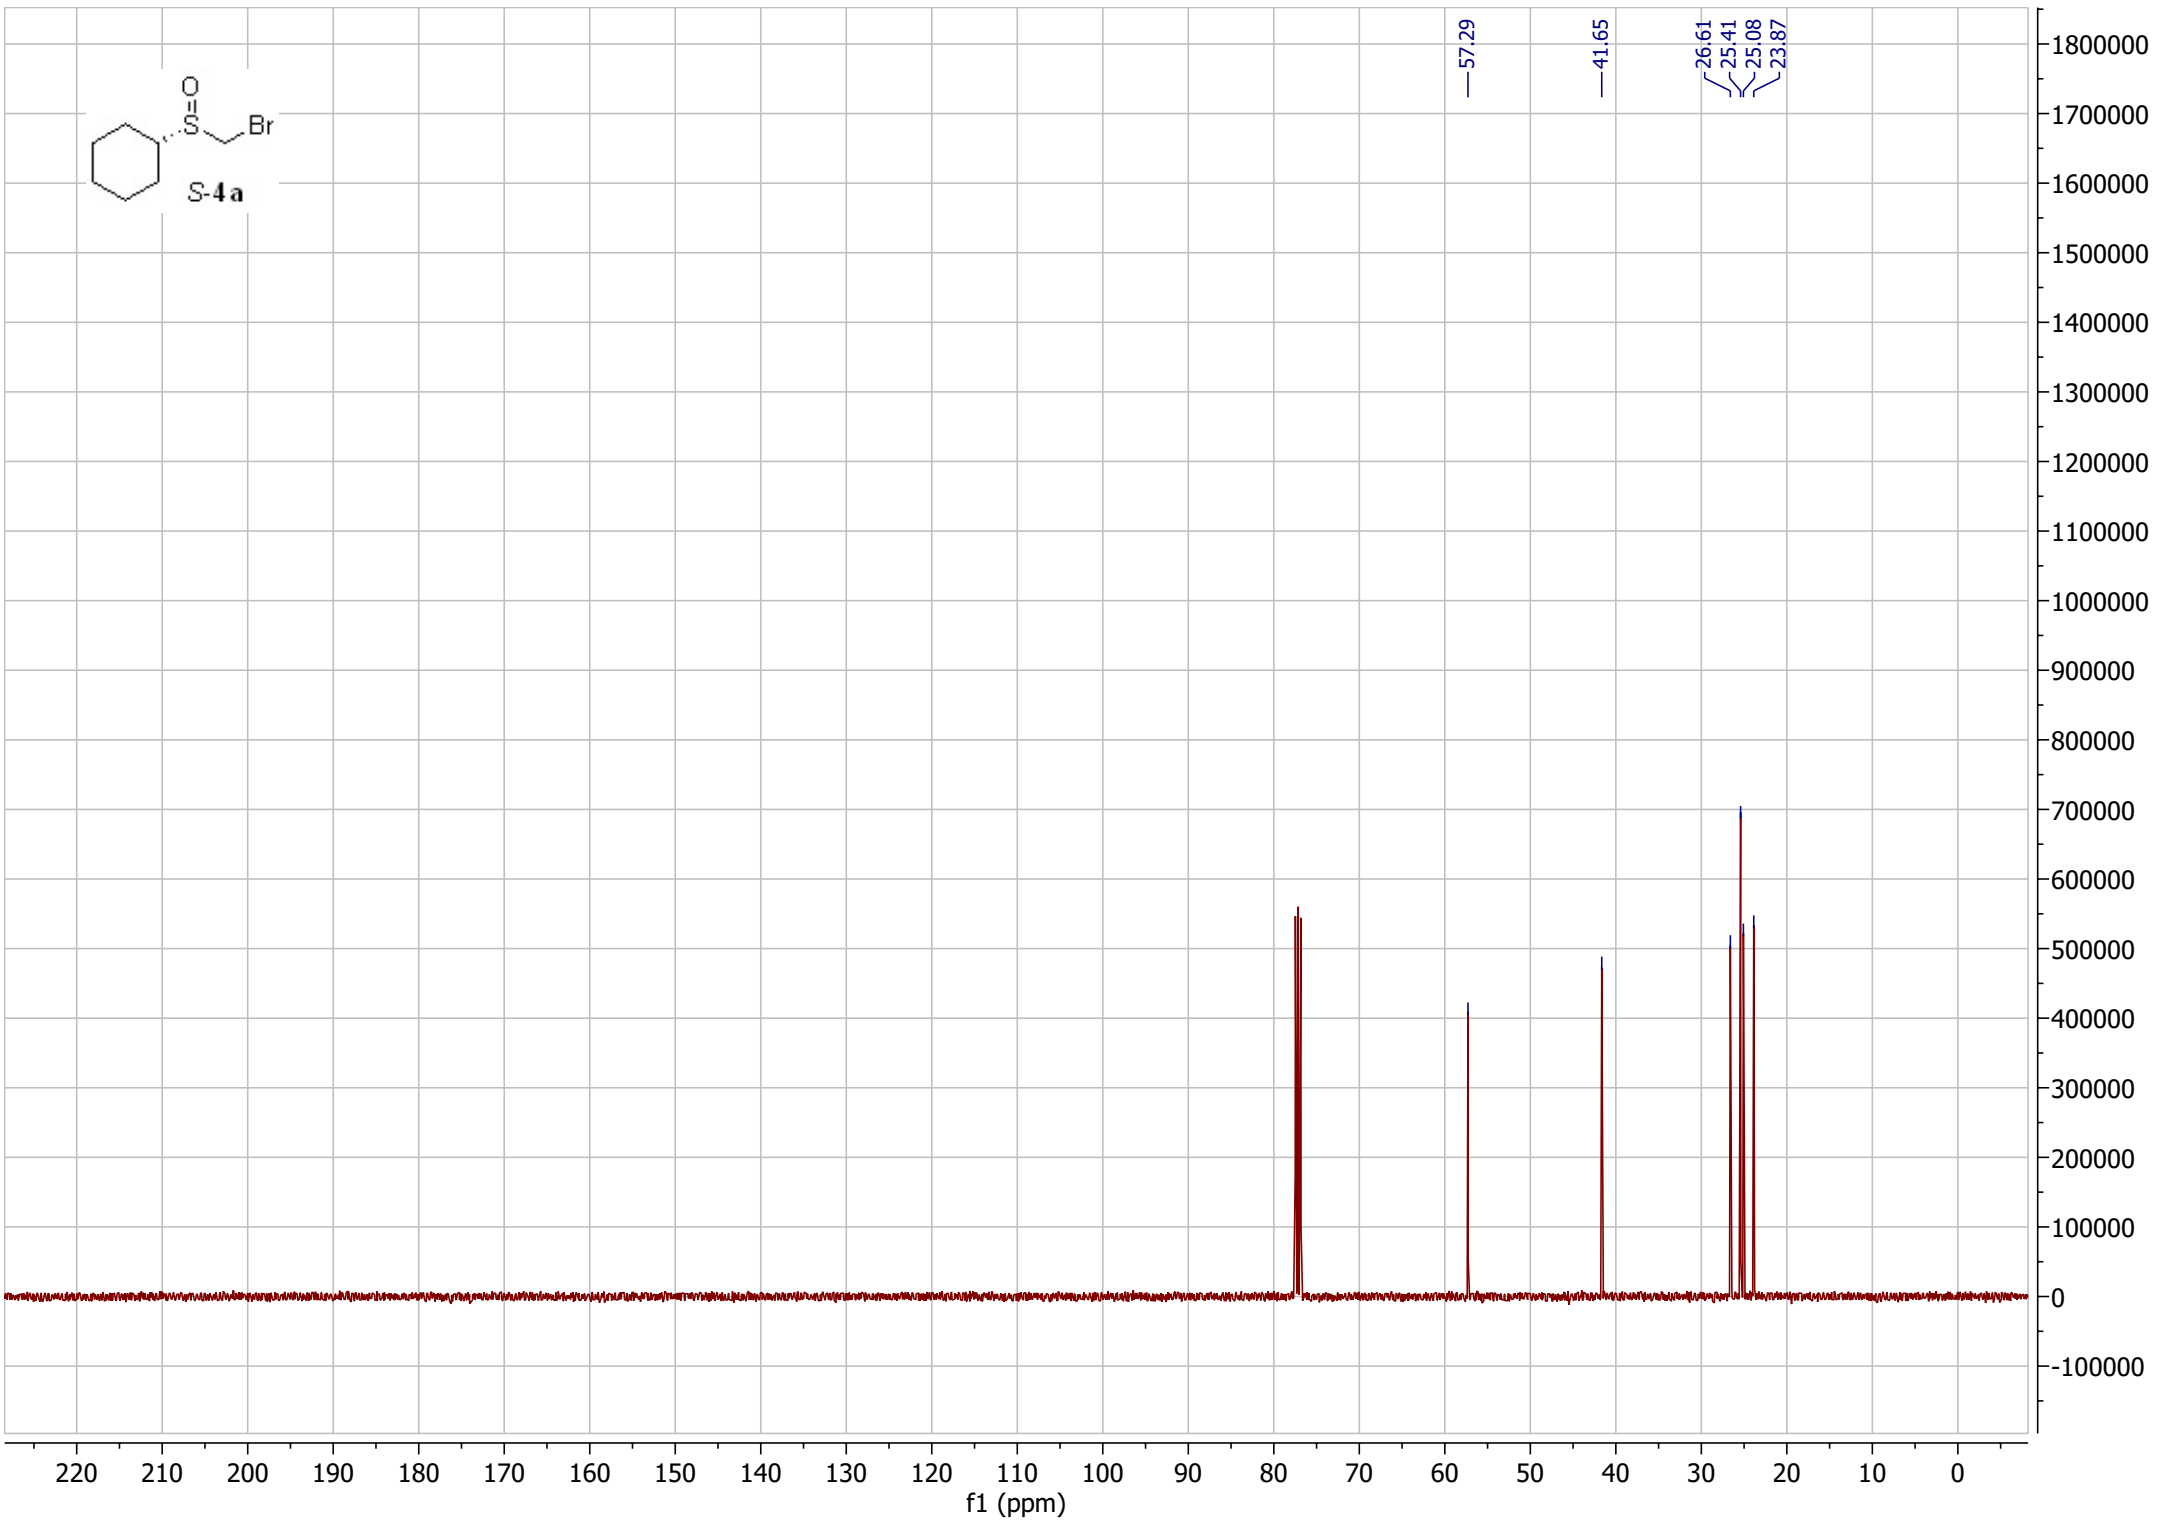



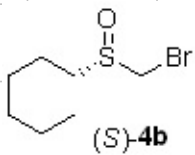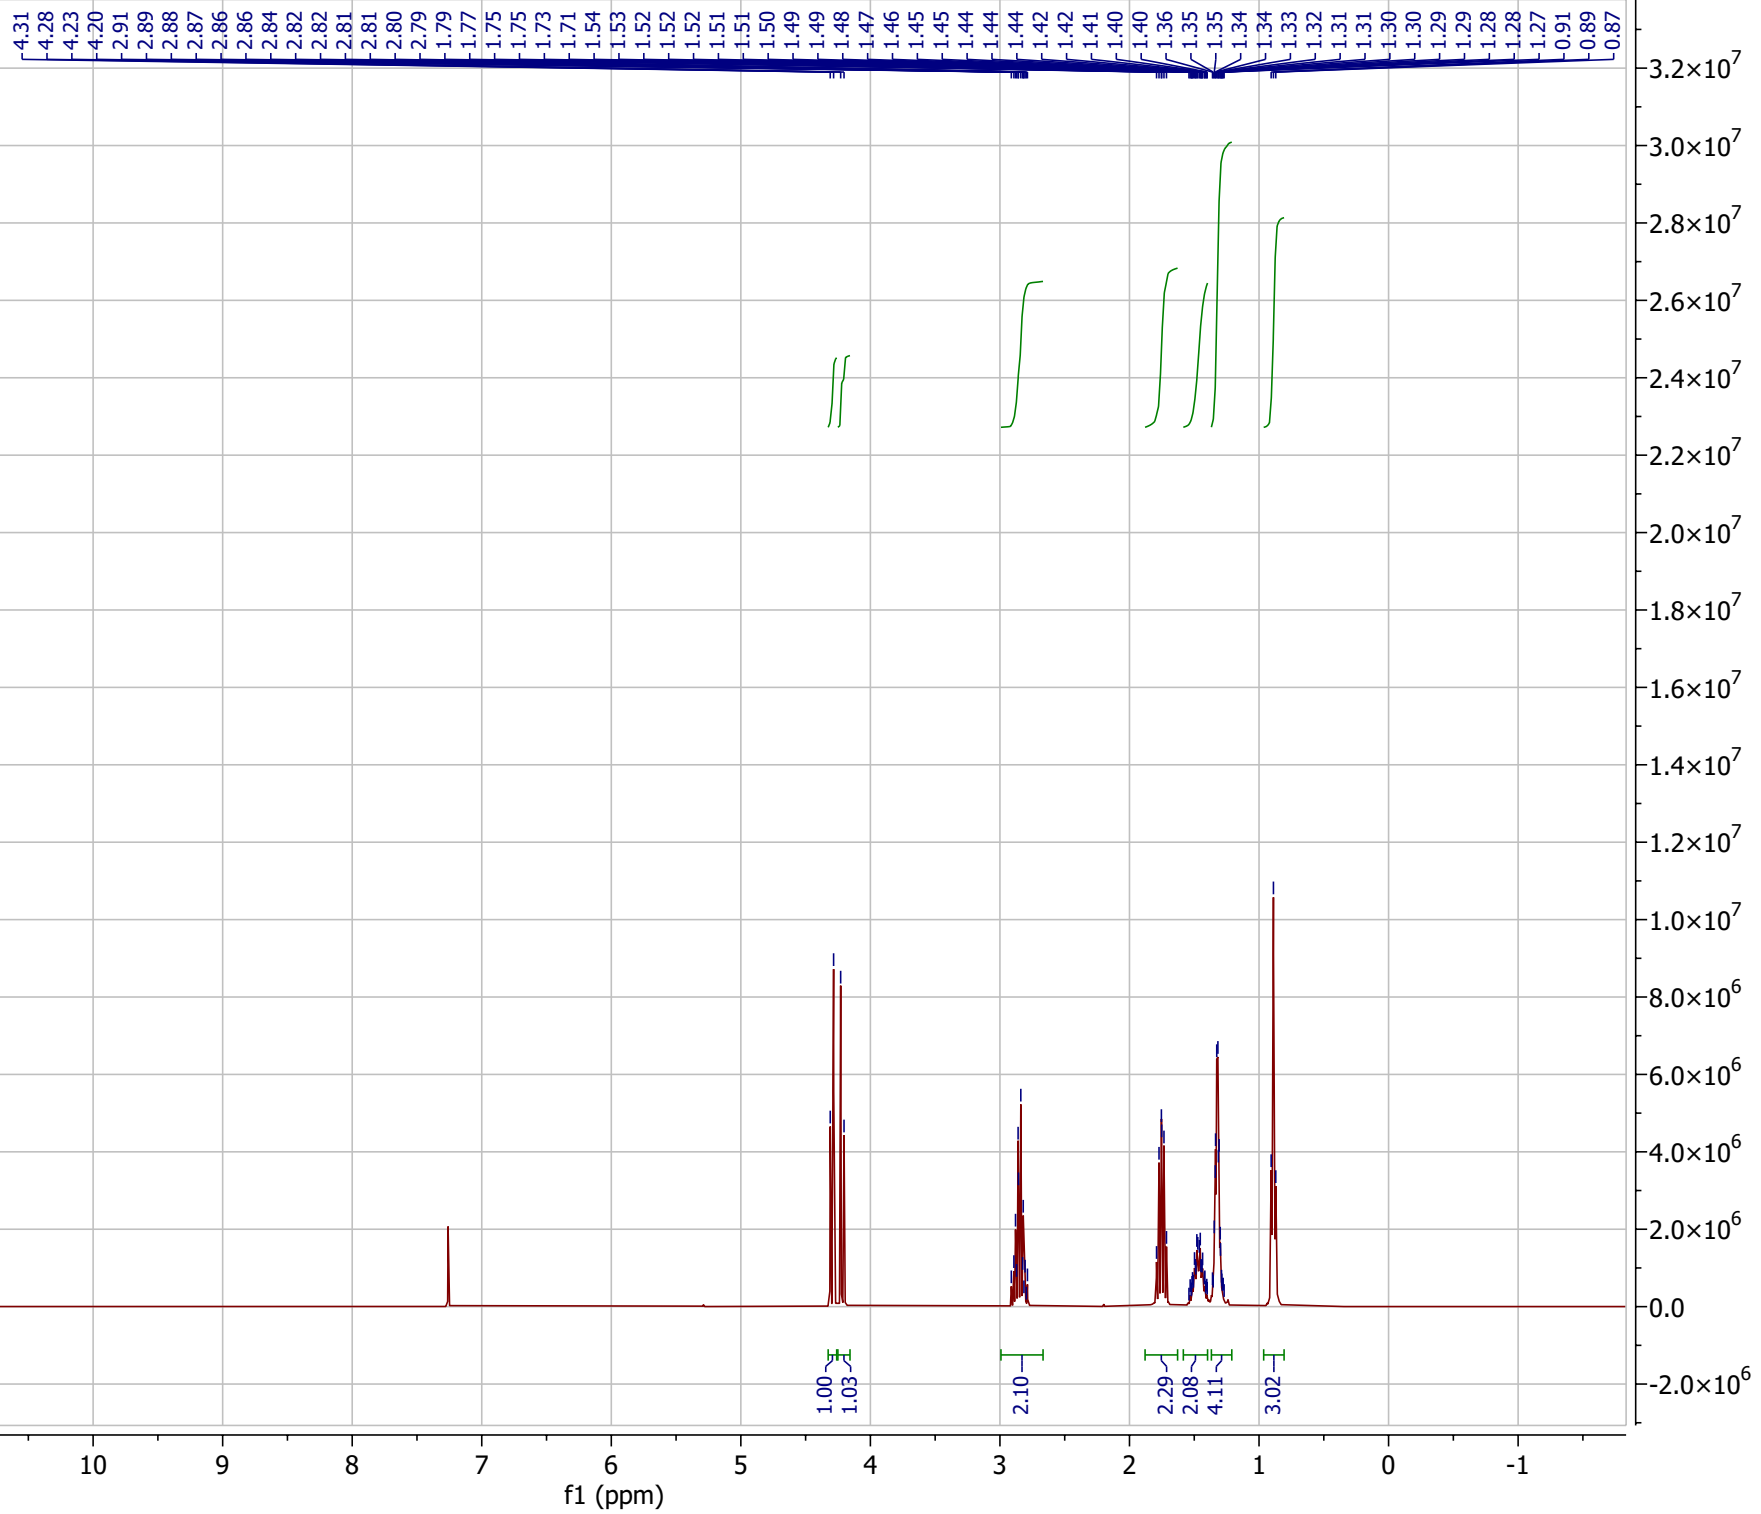

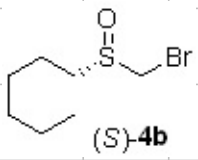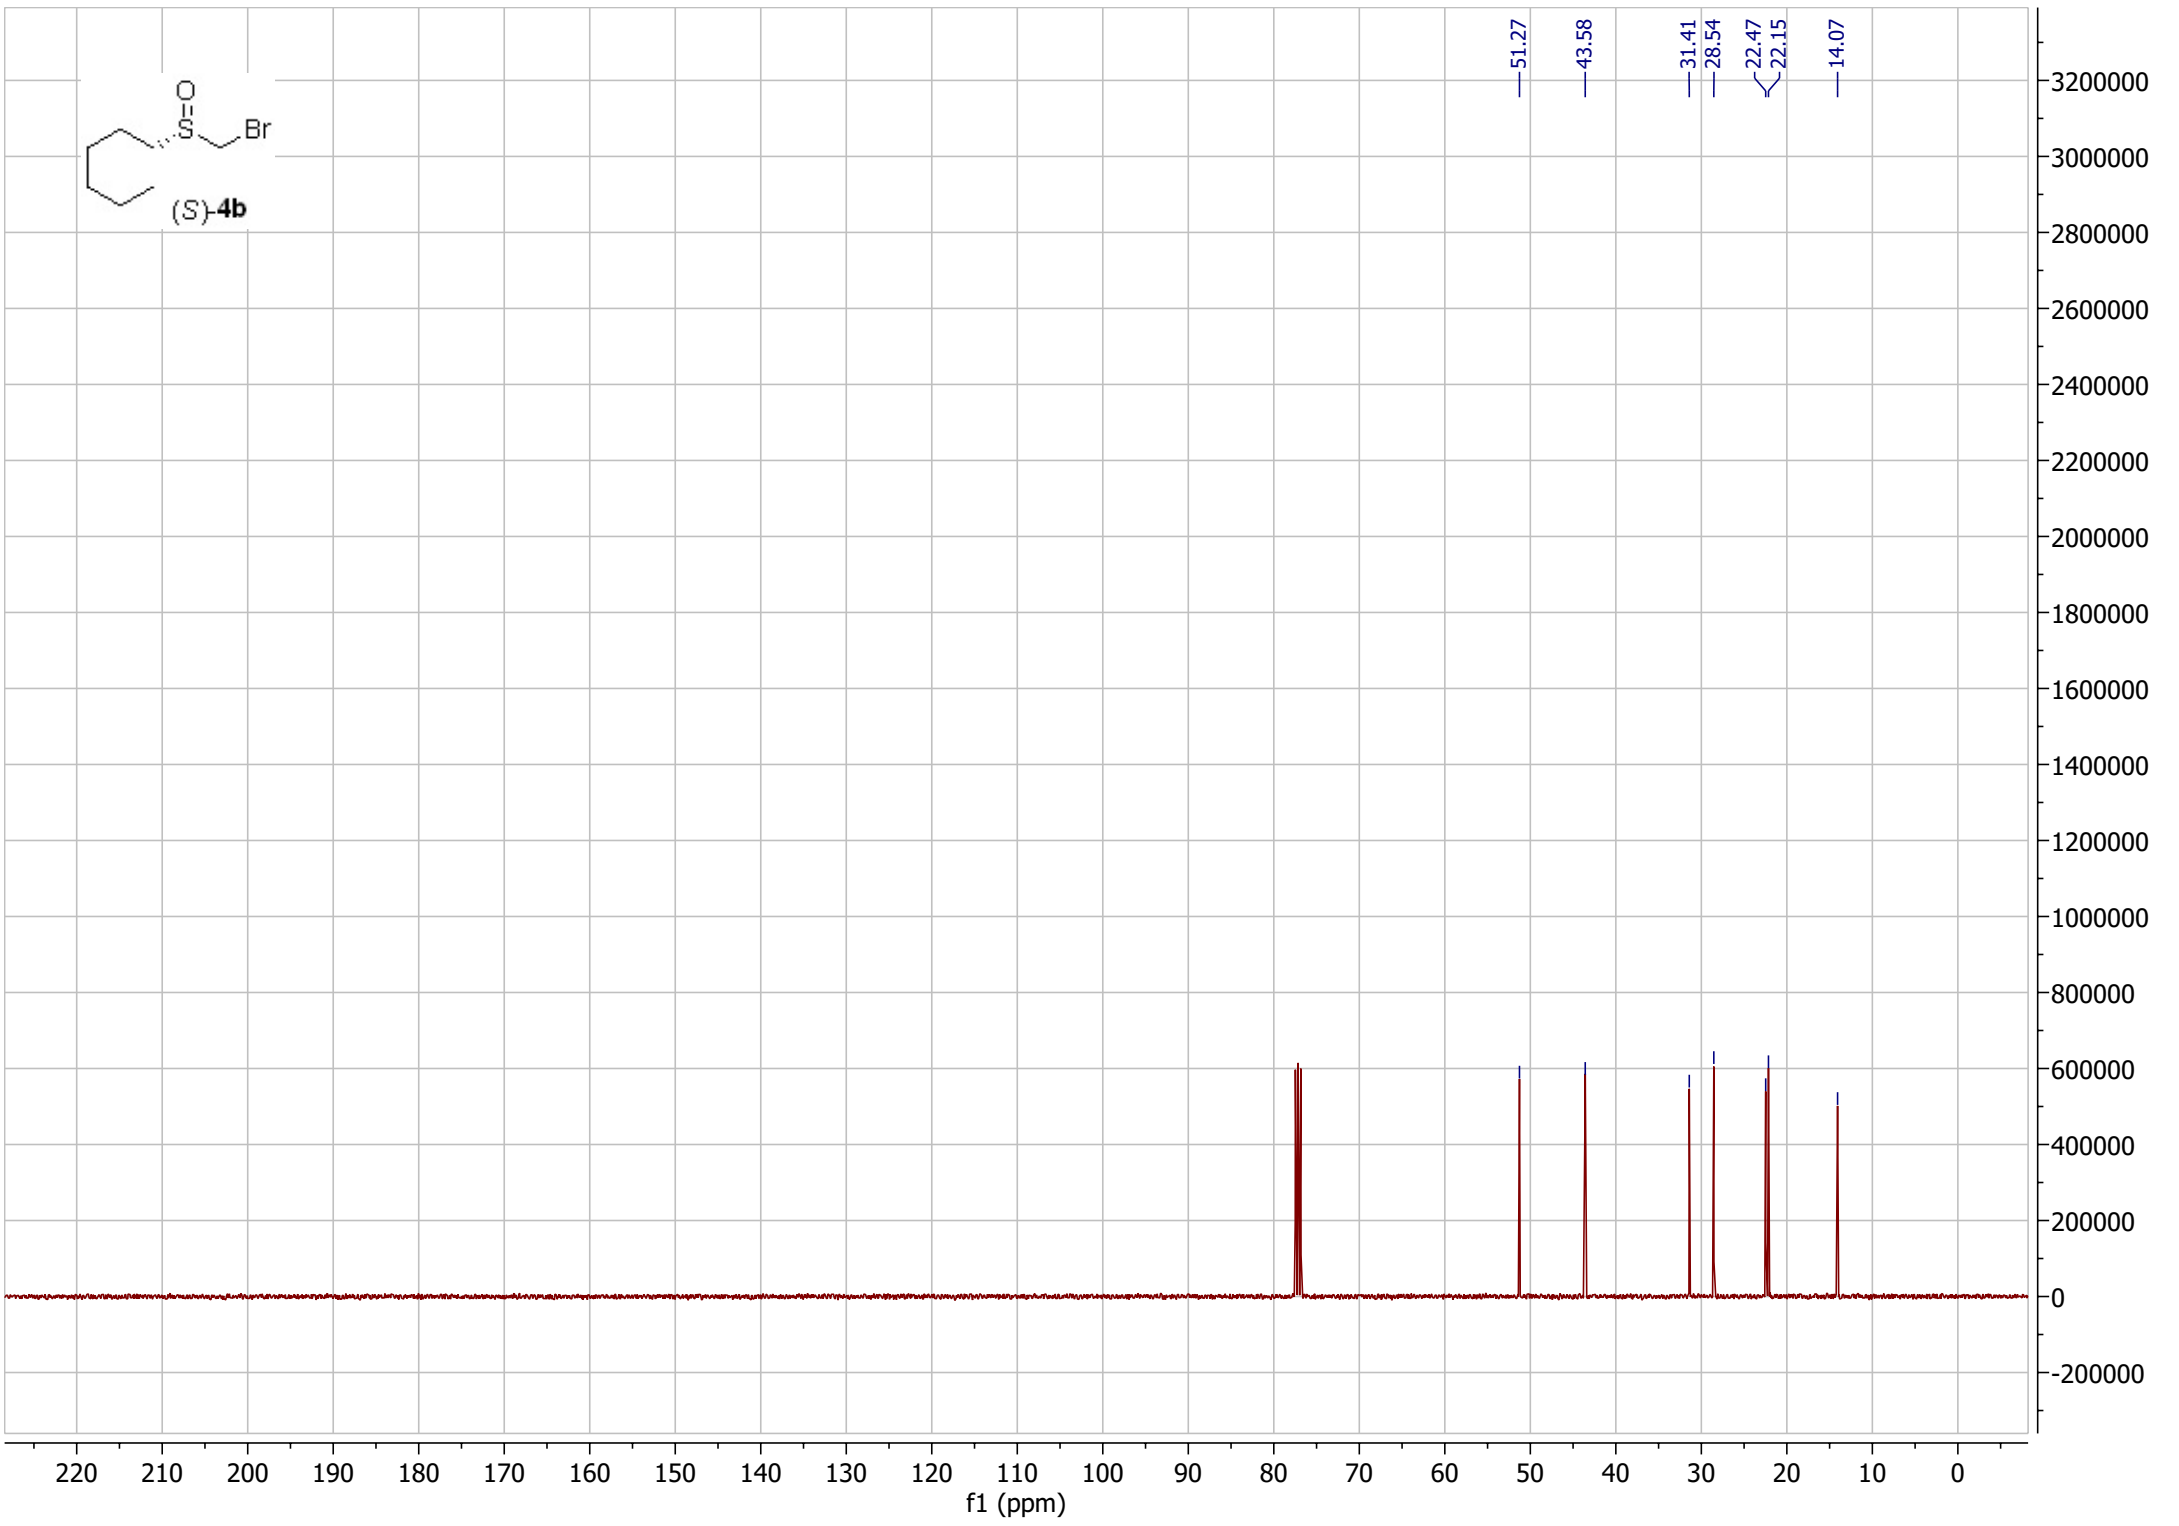

PROTON\_01

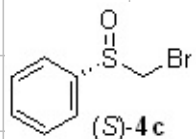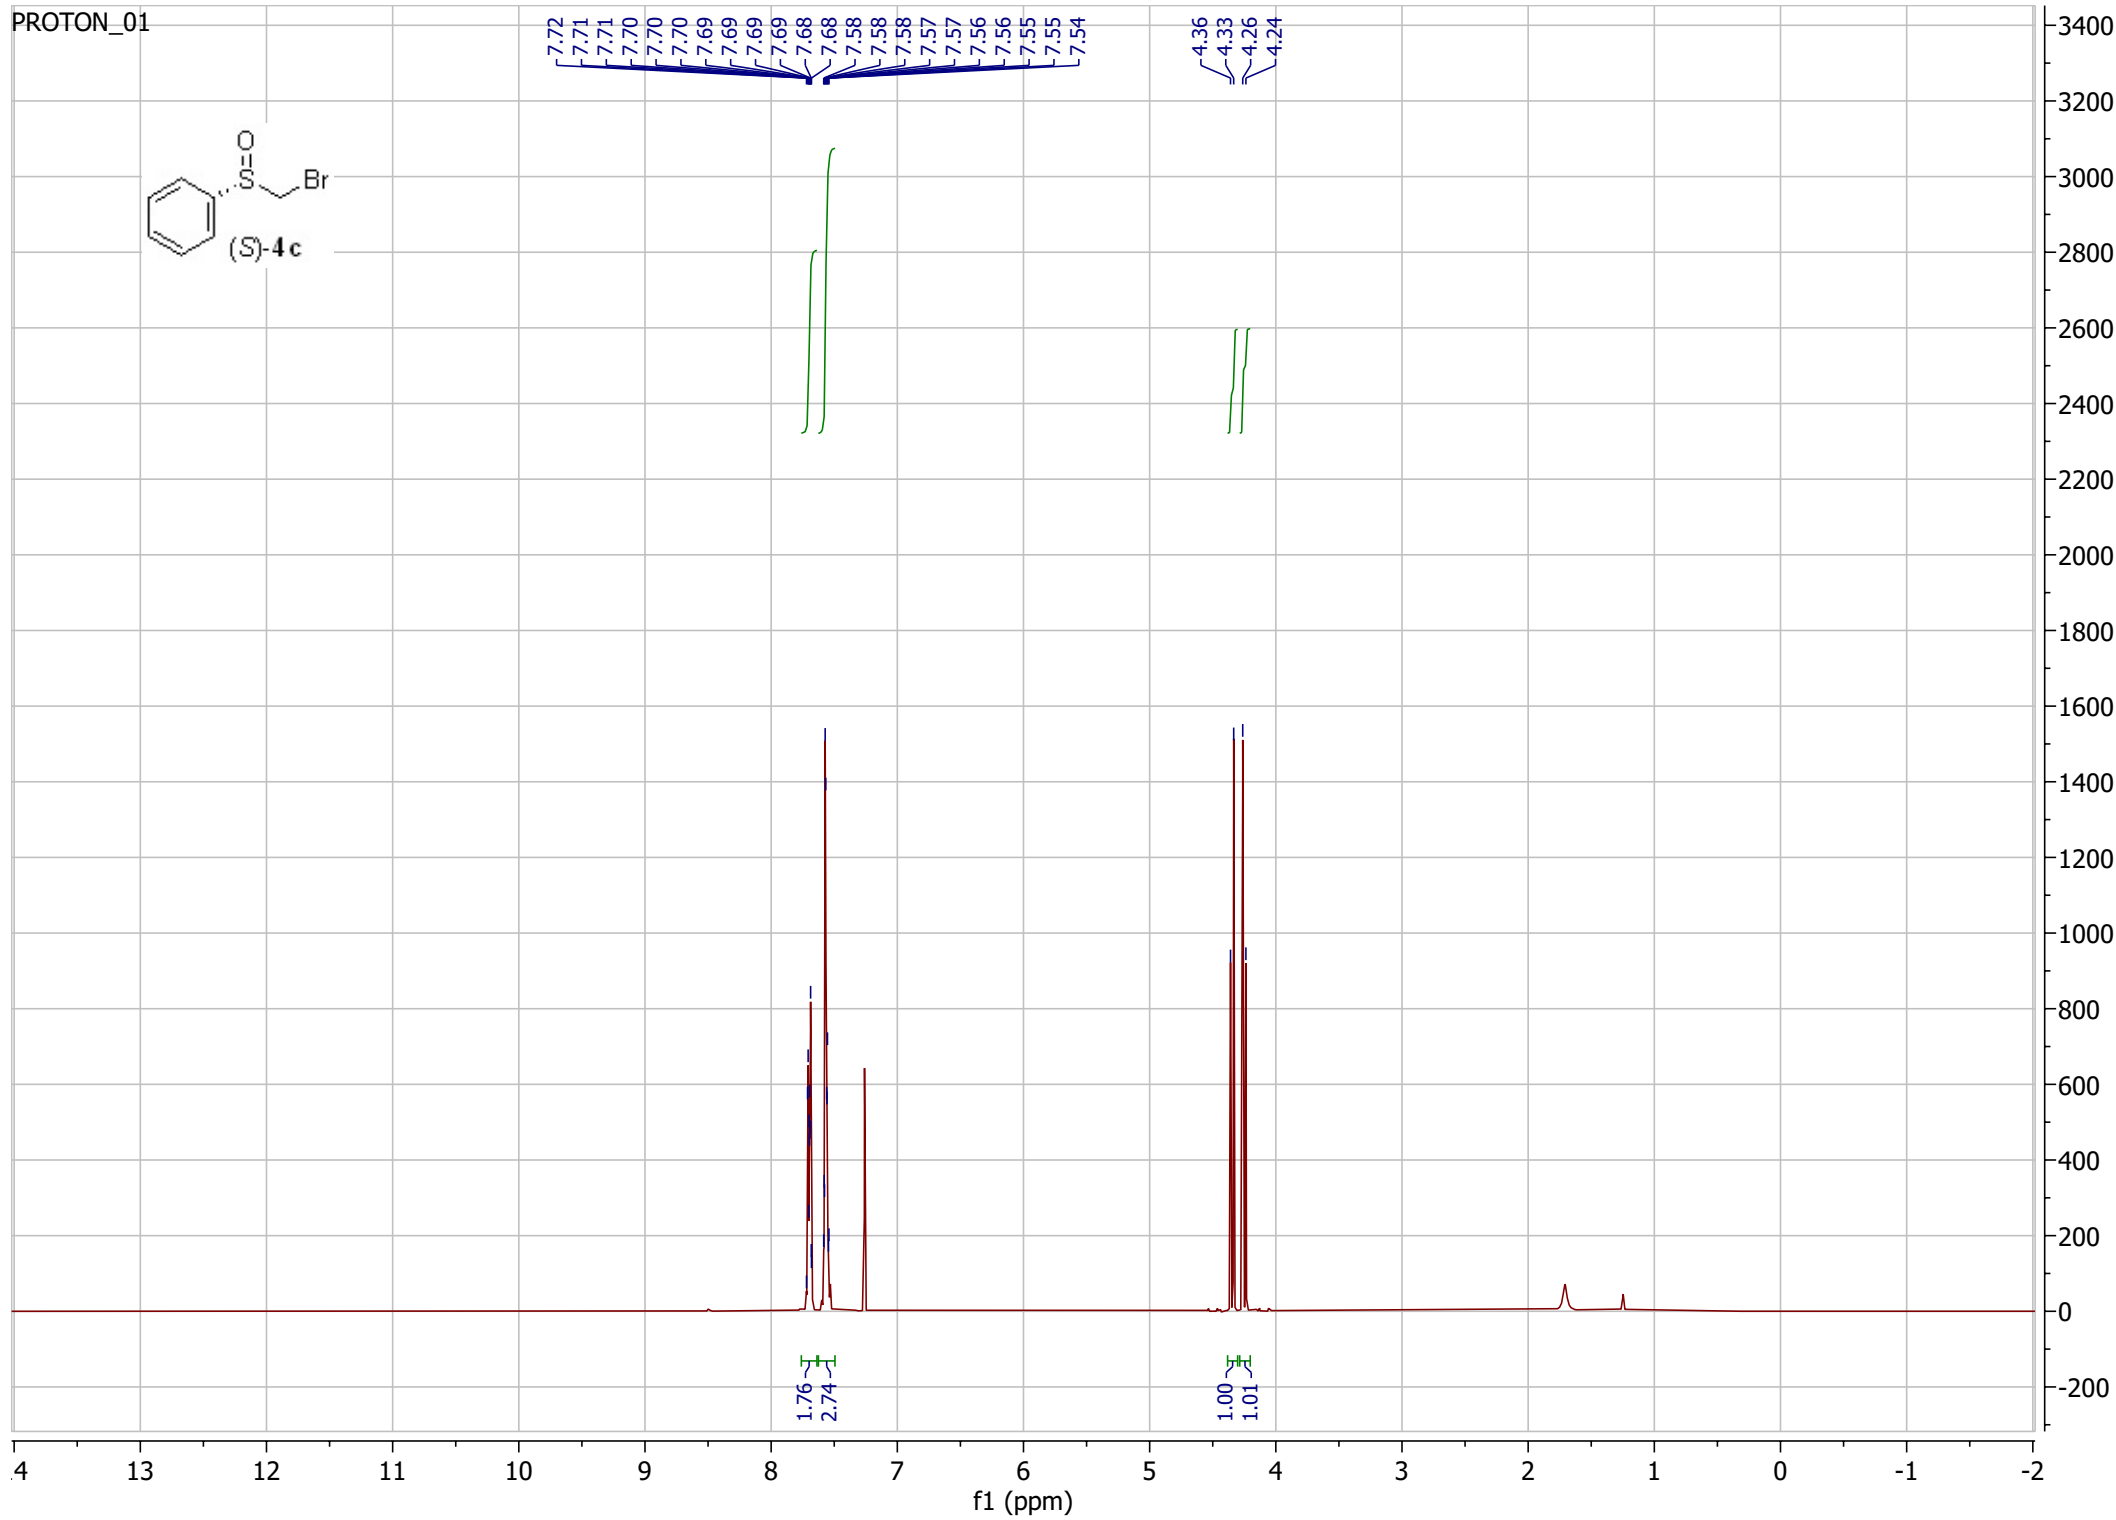

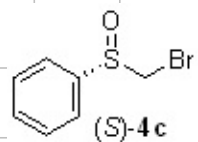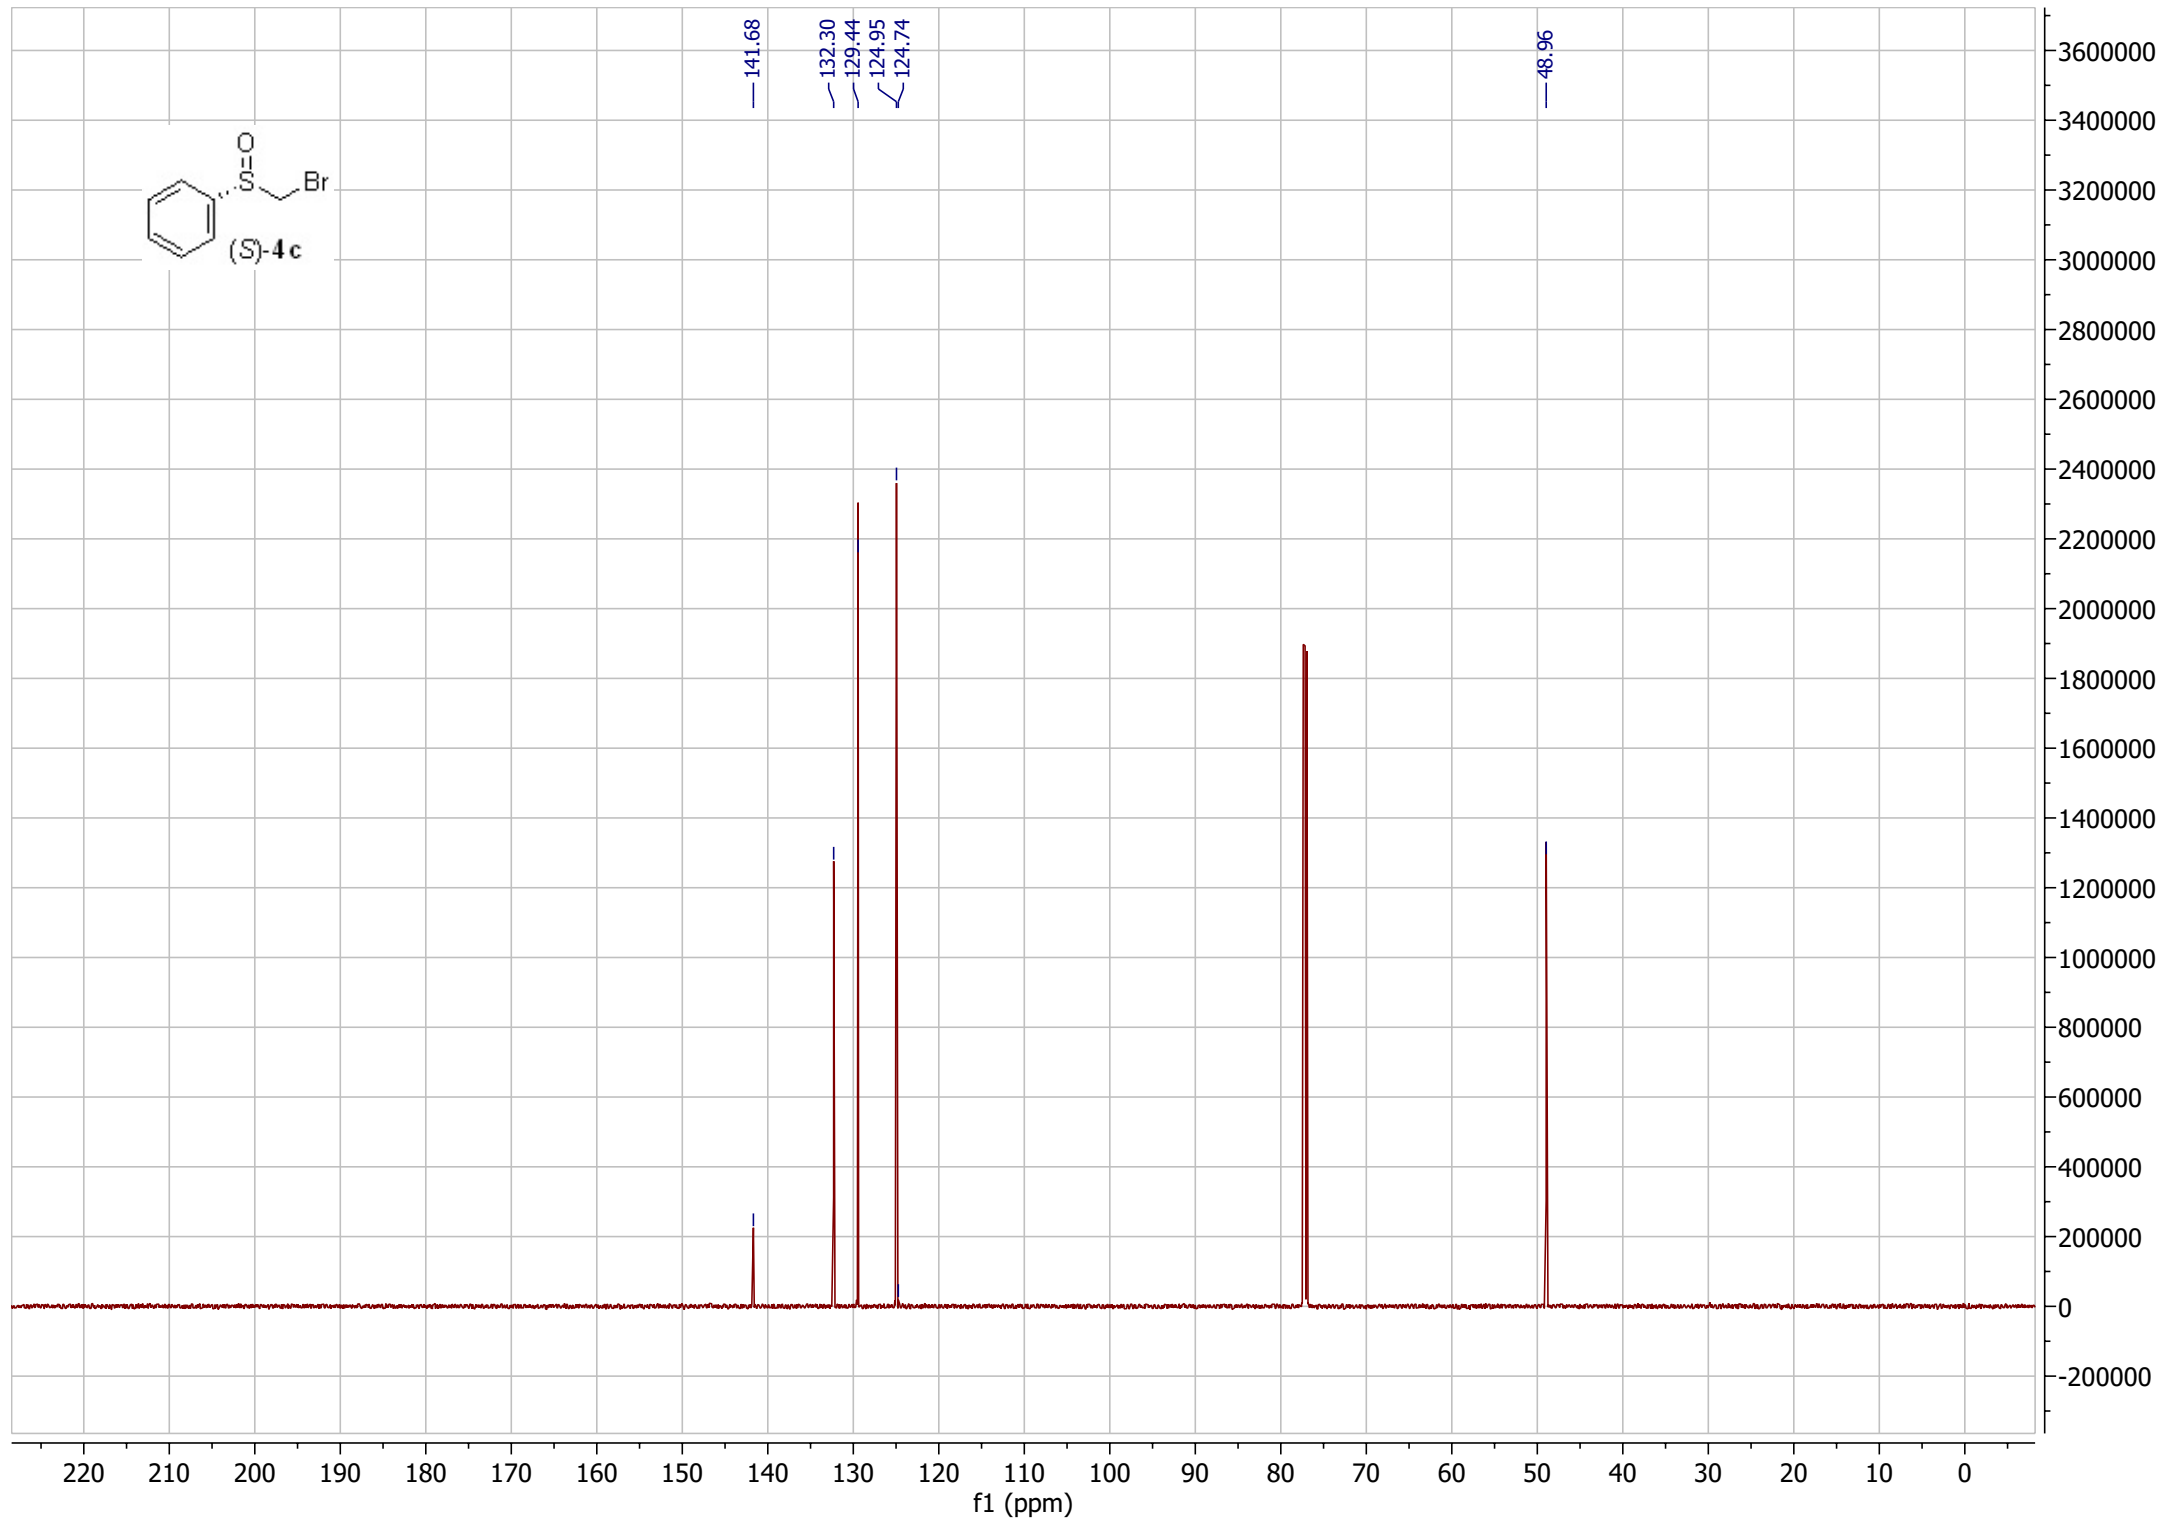

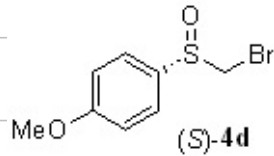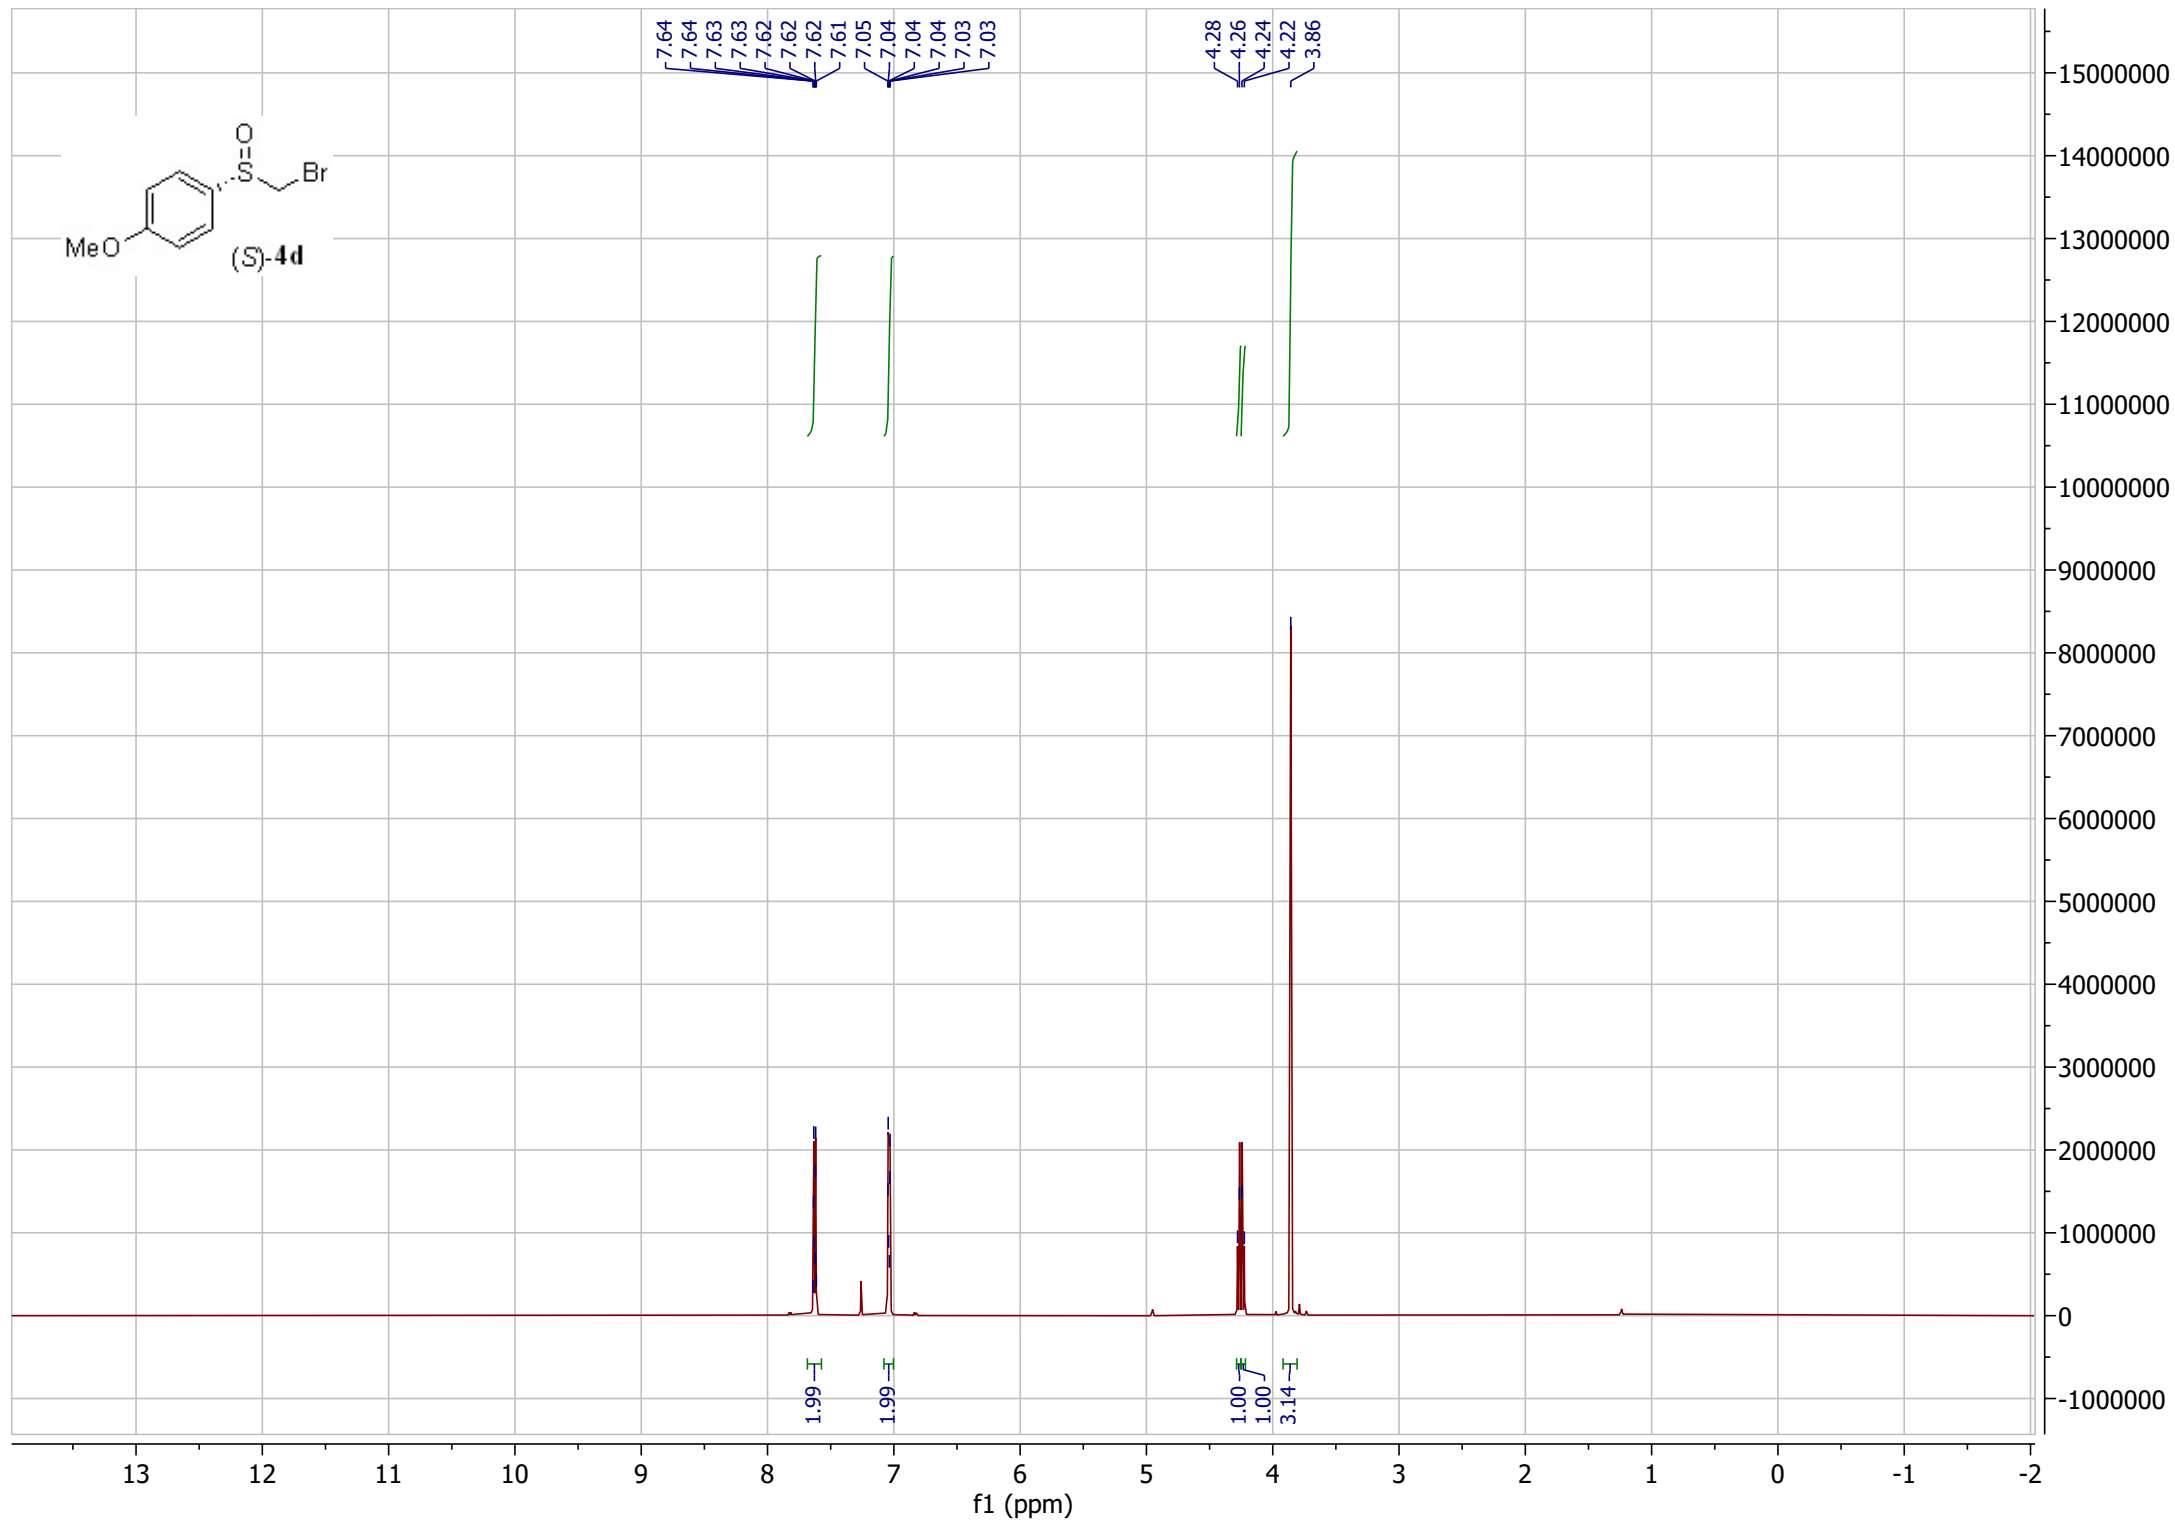

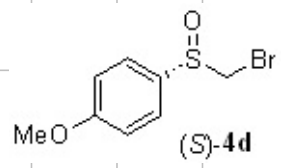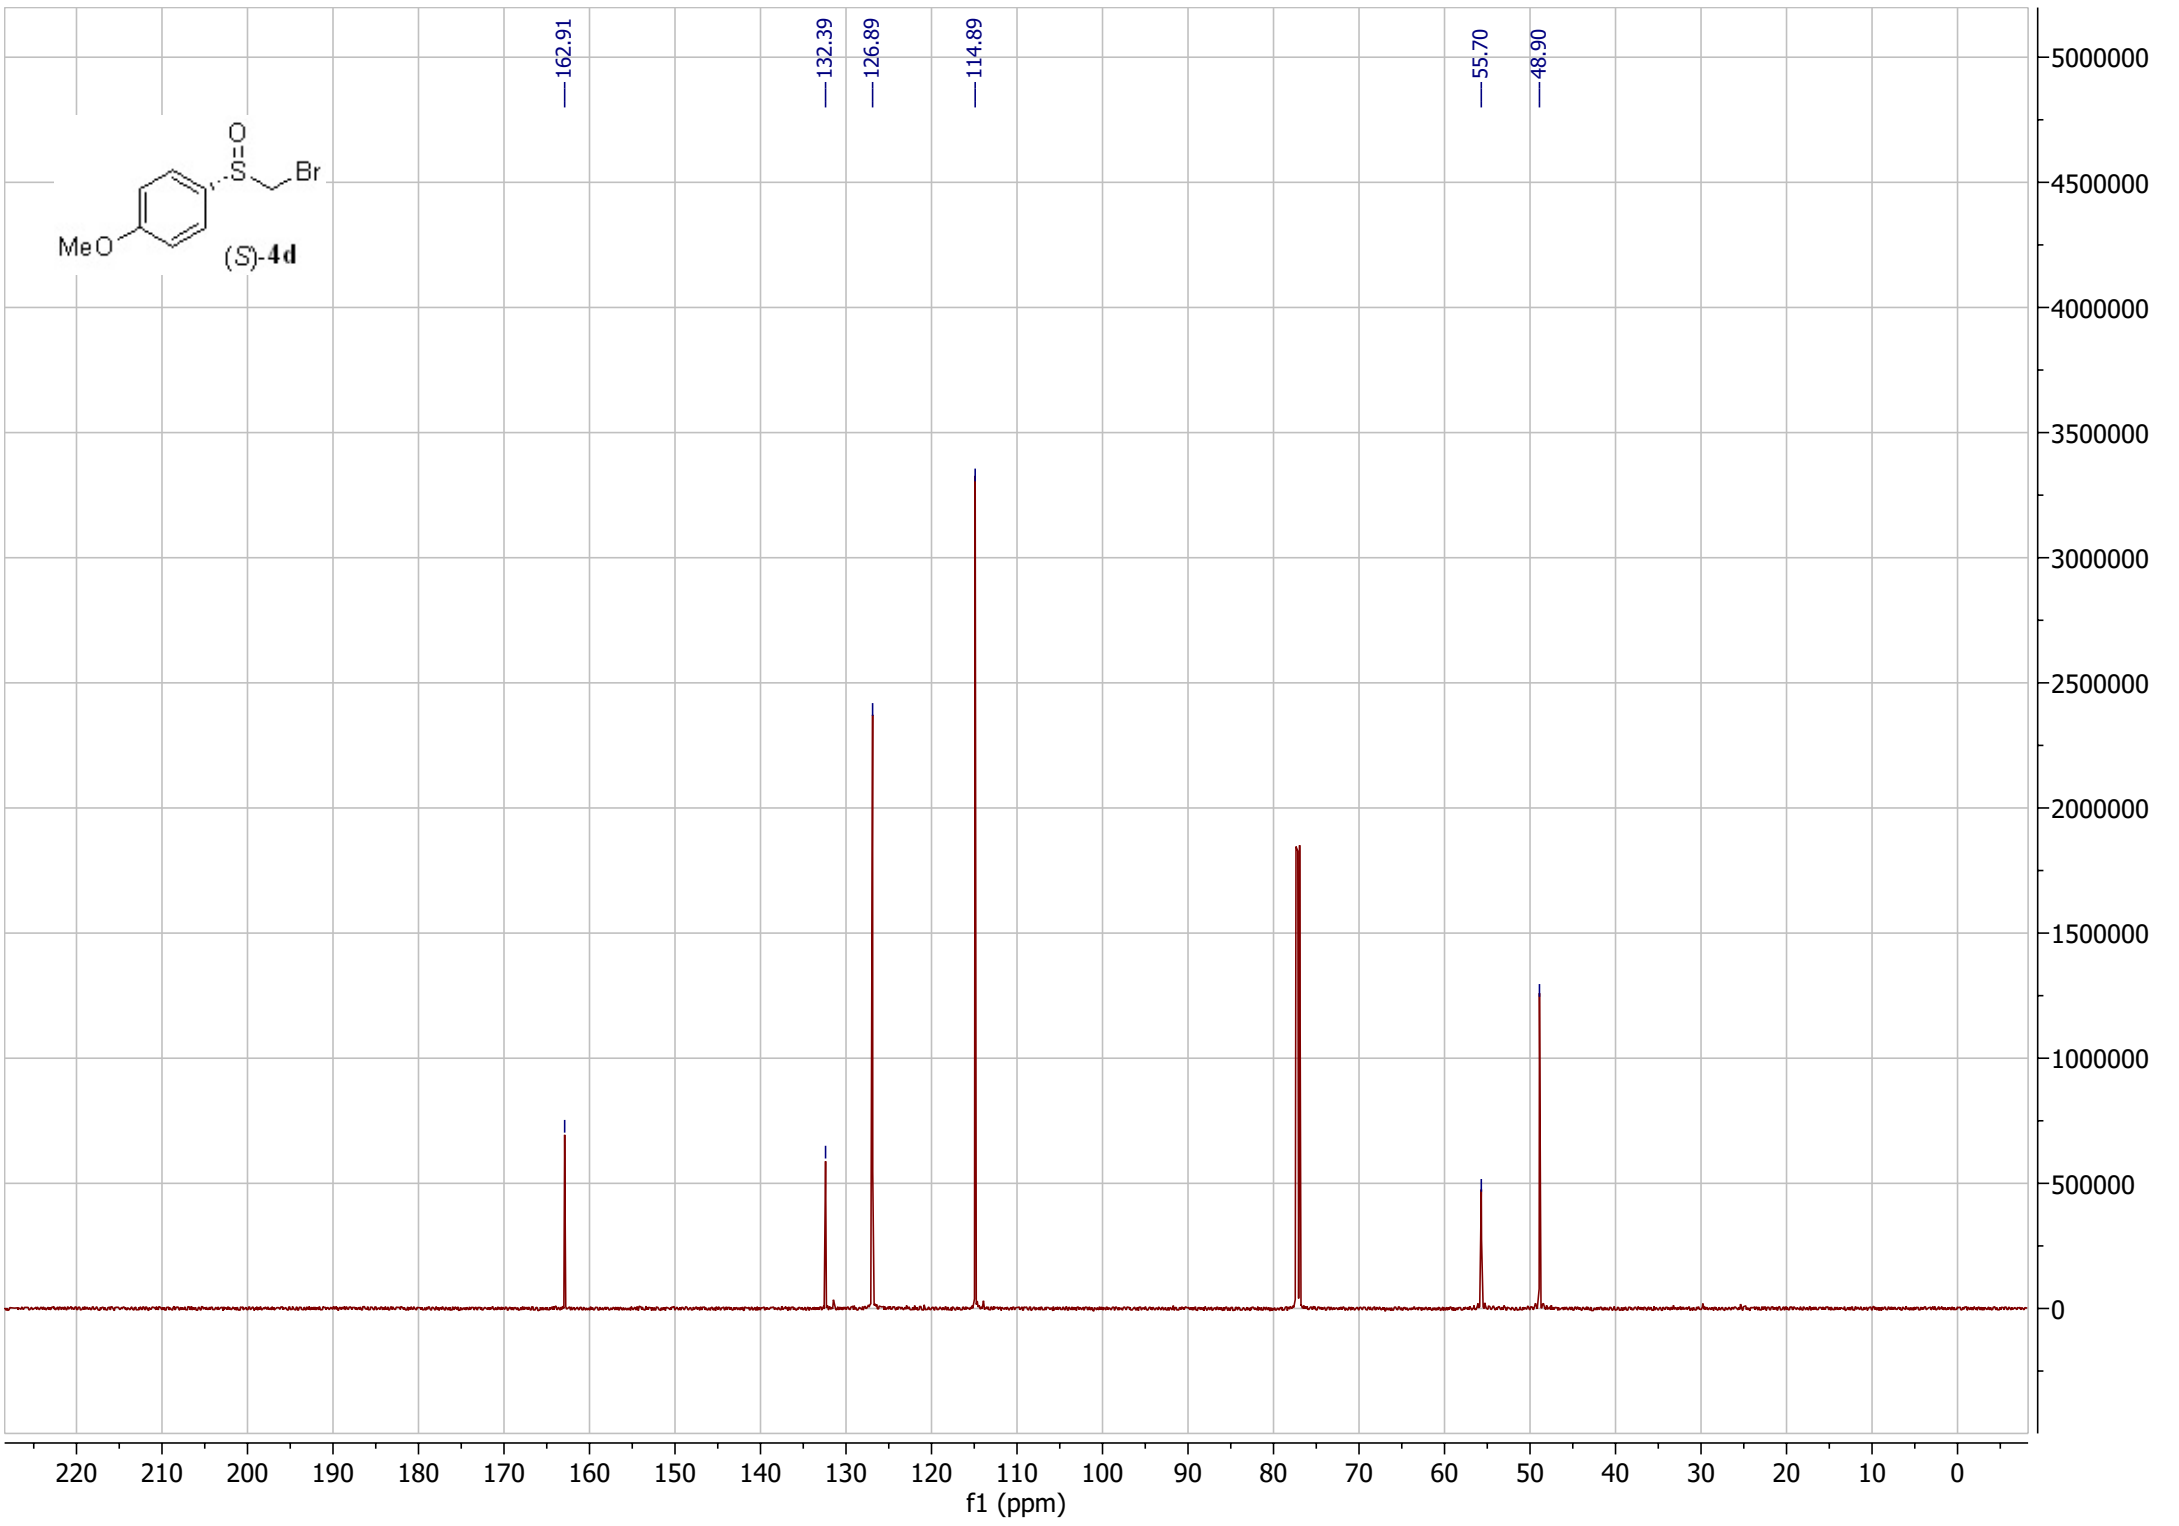

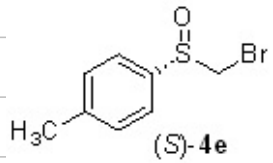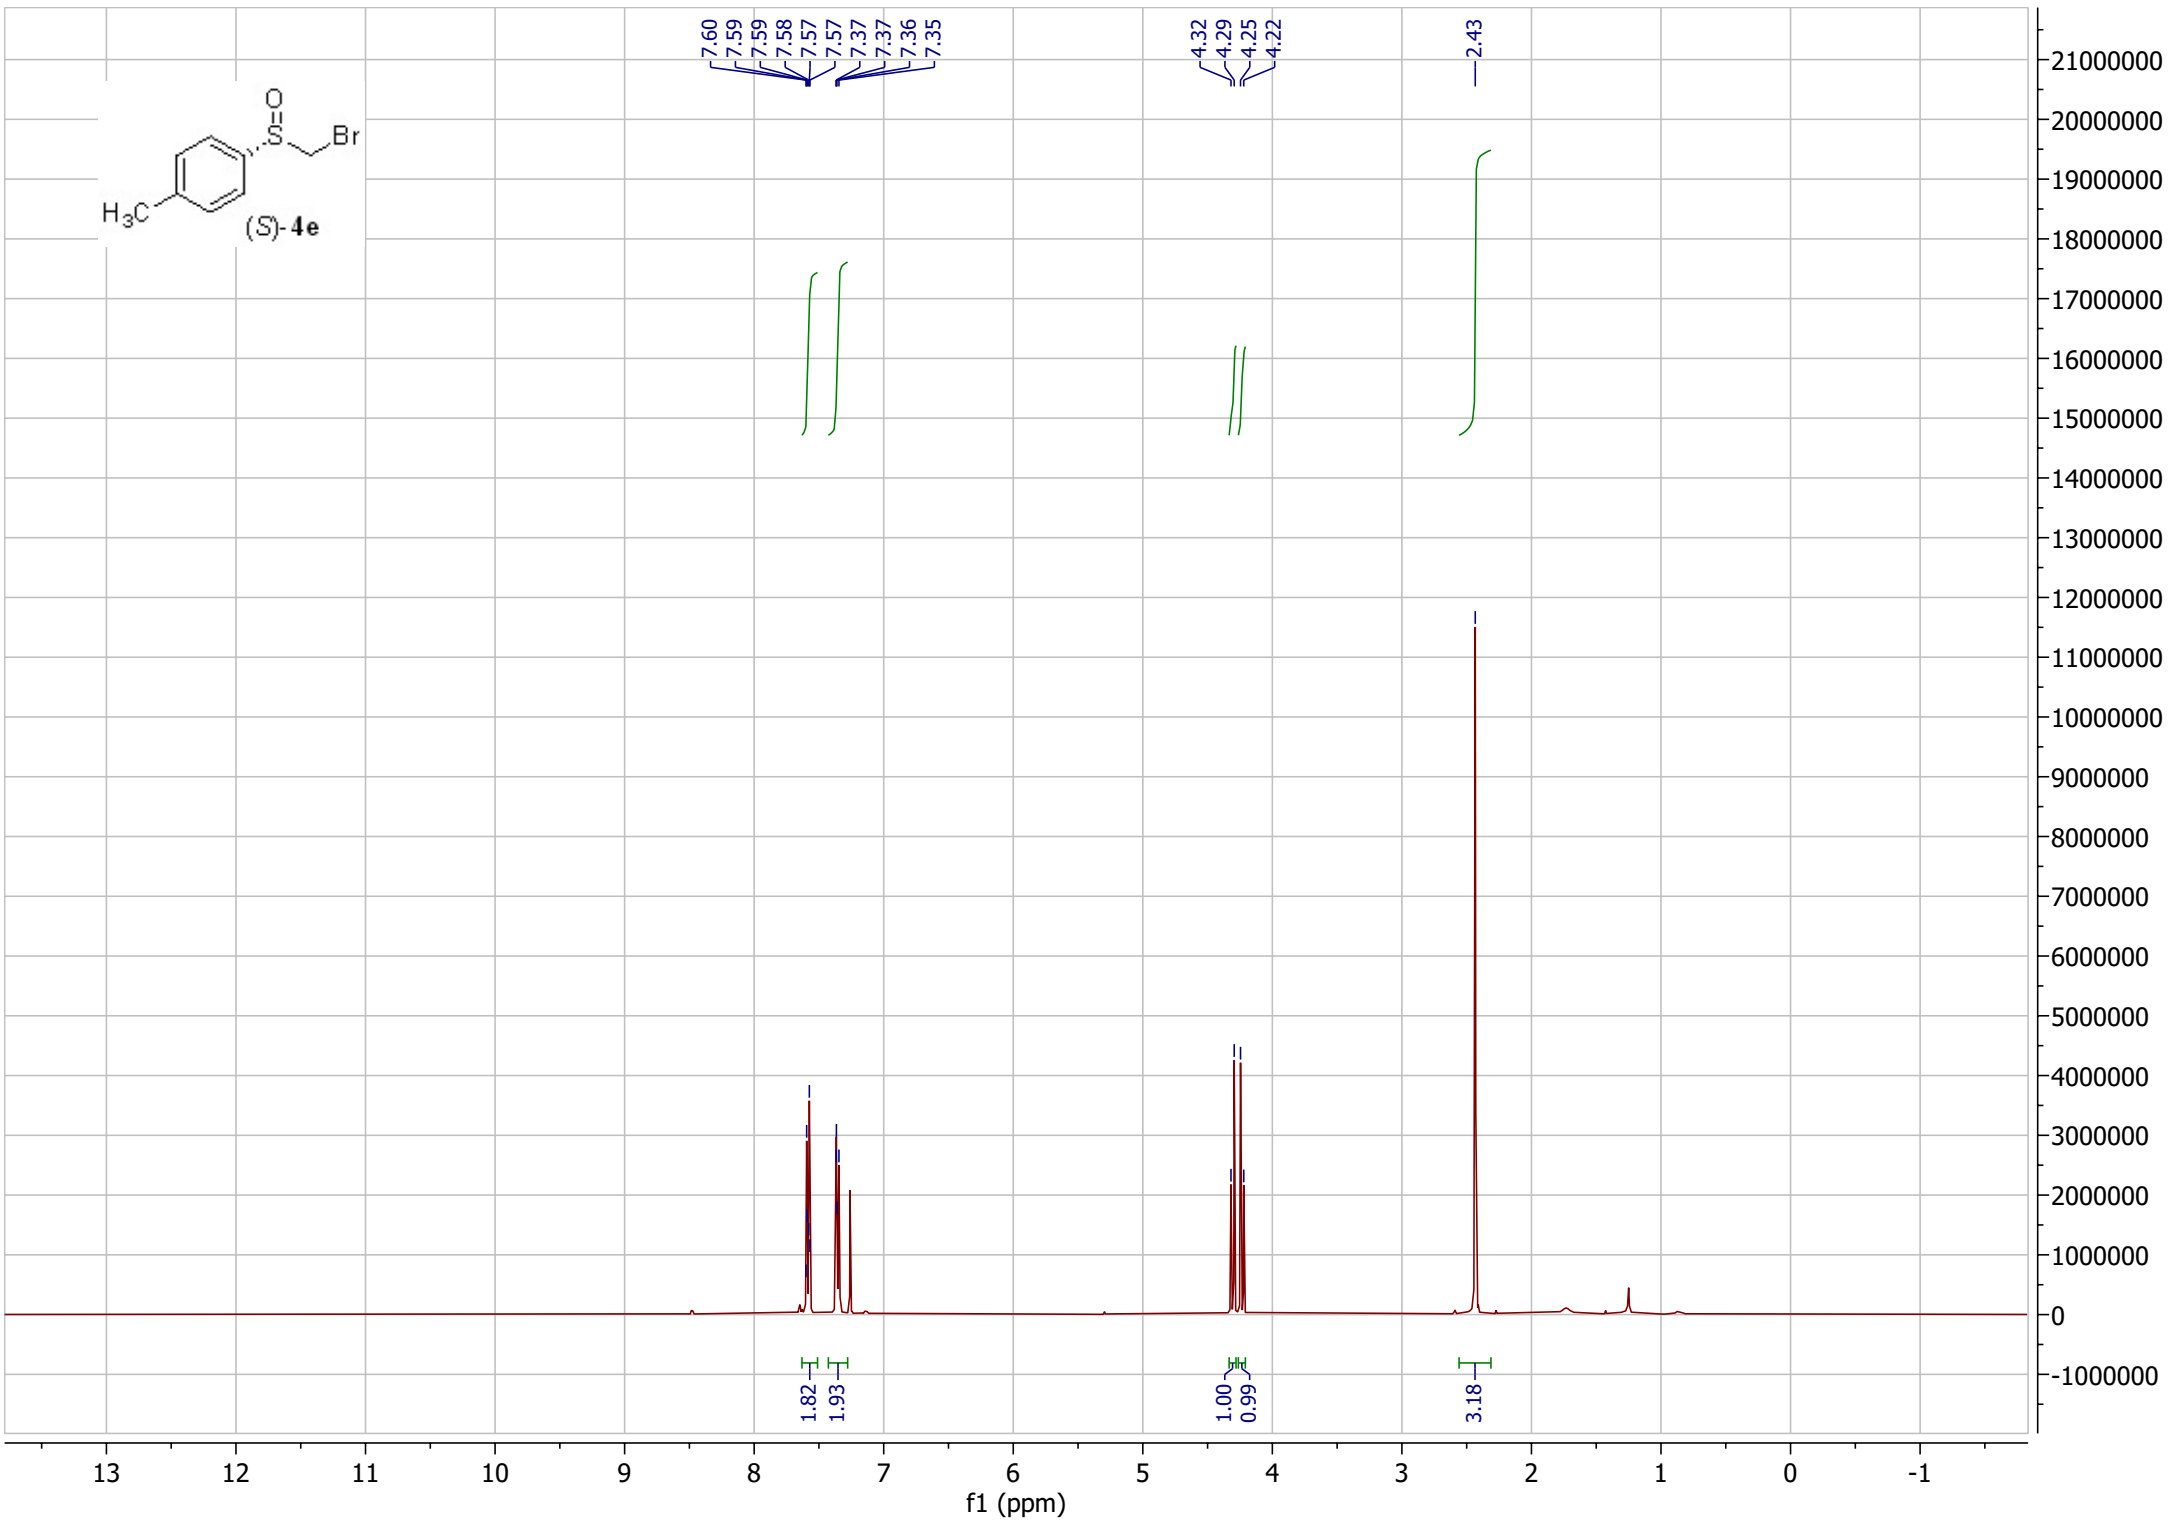

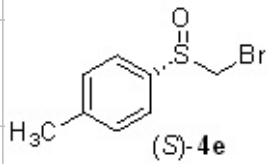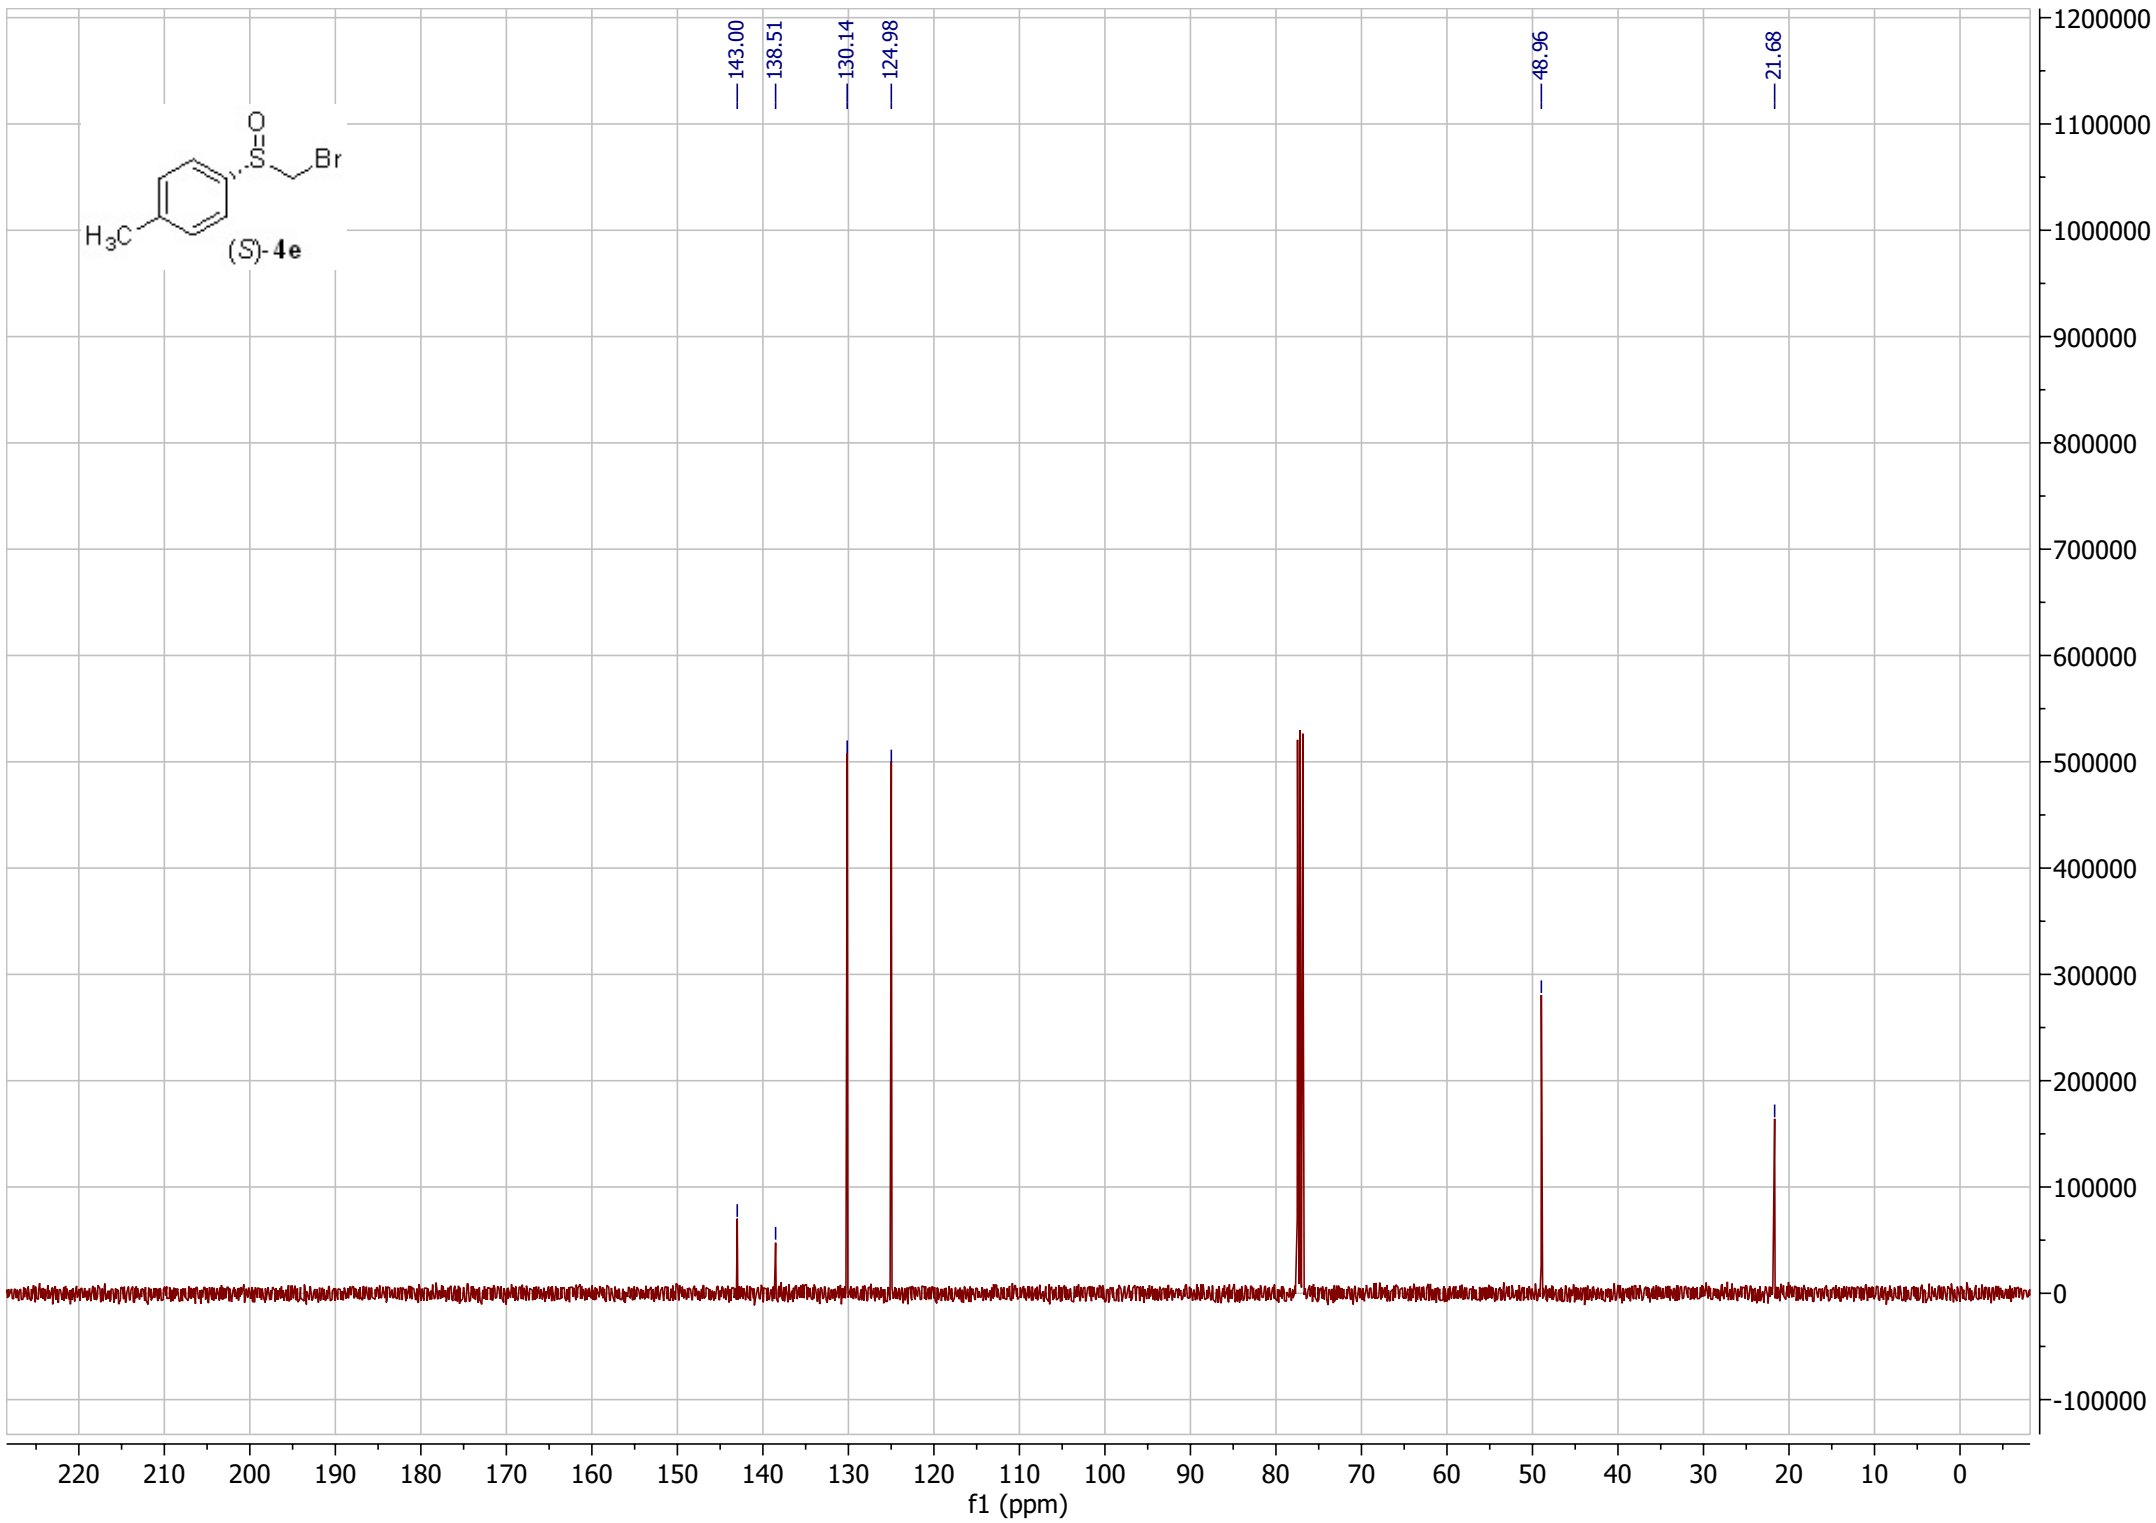



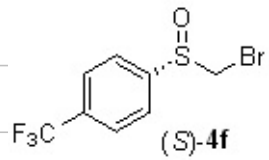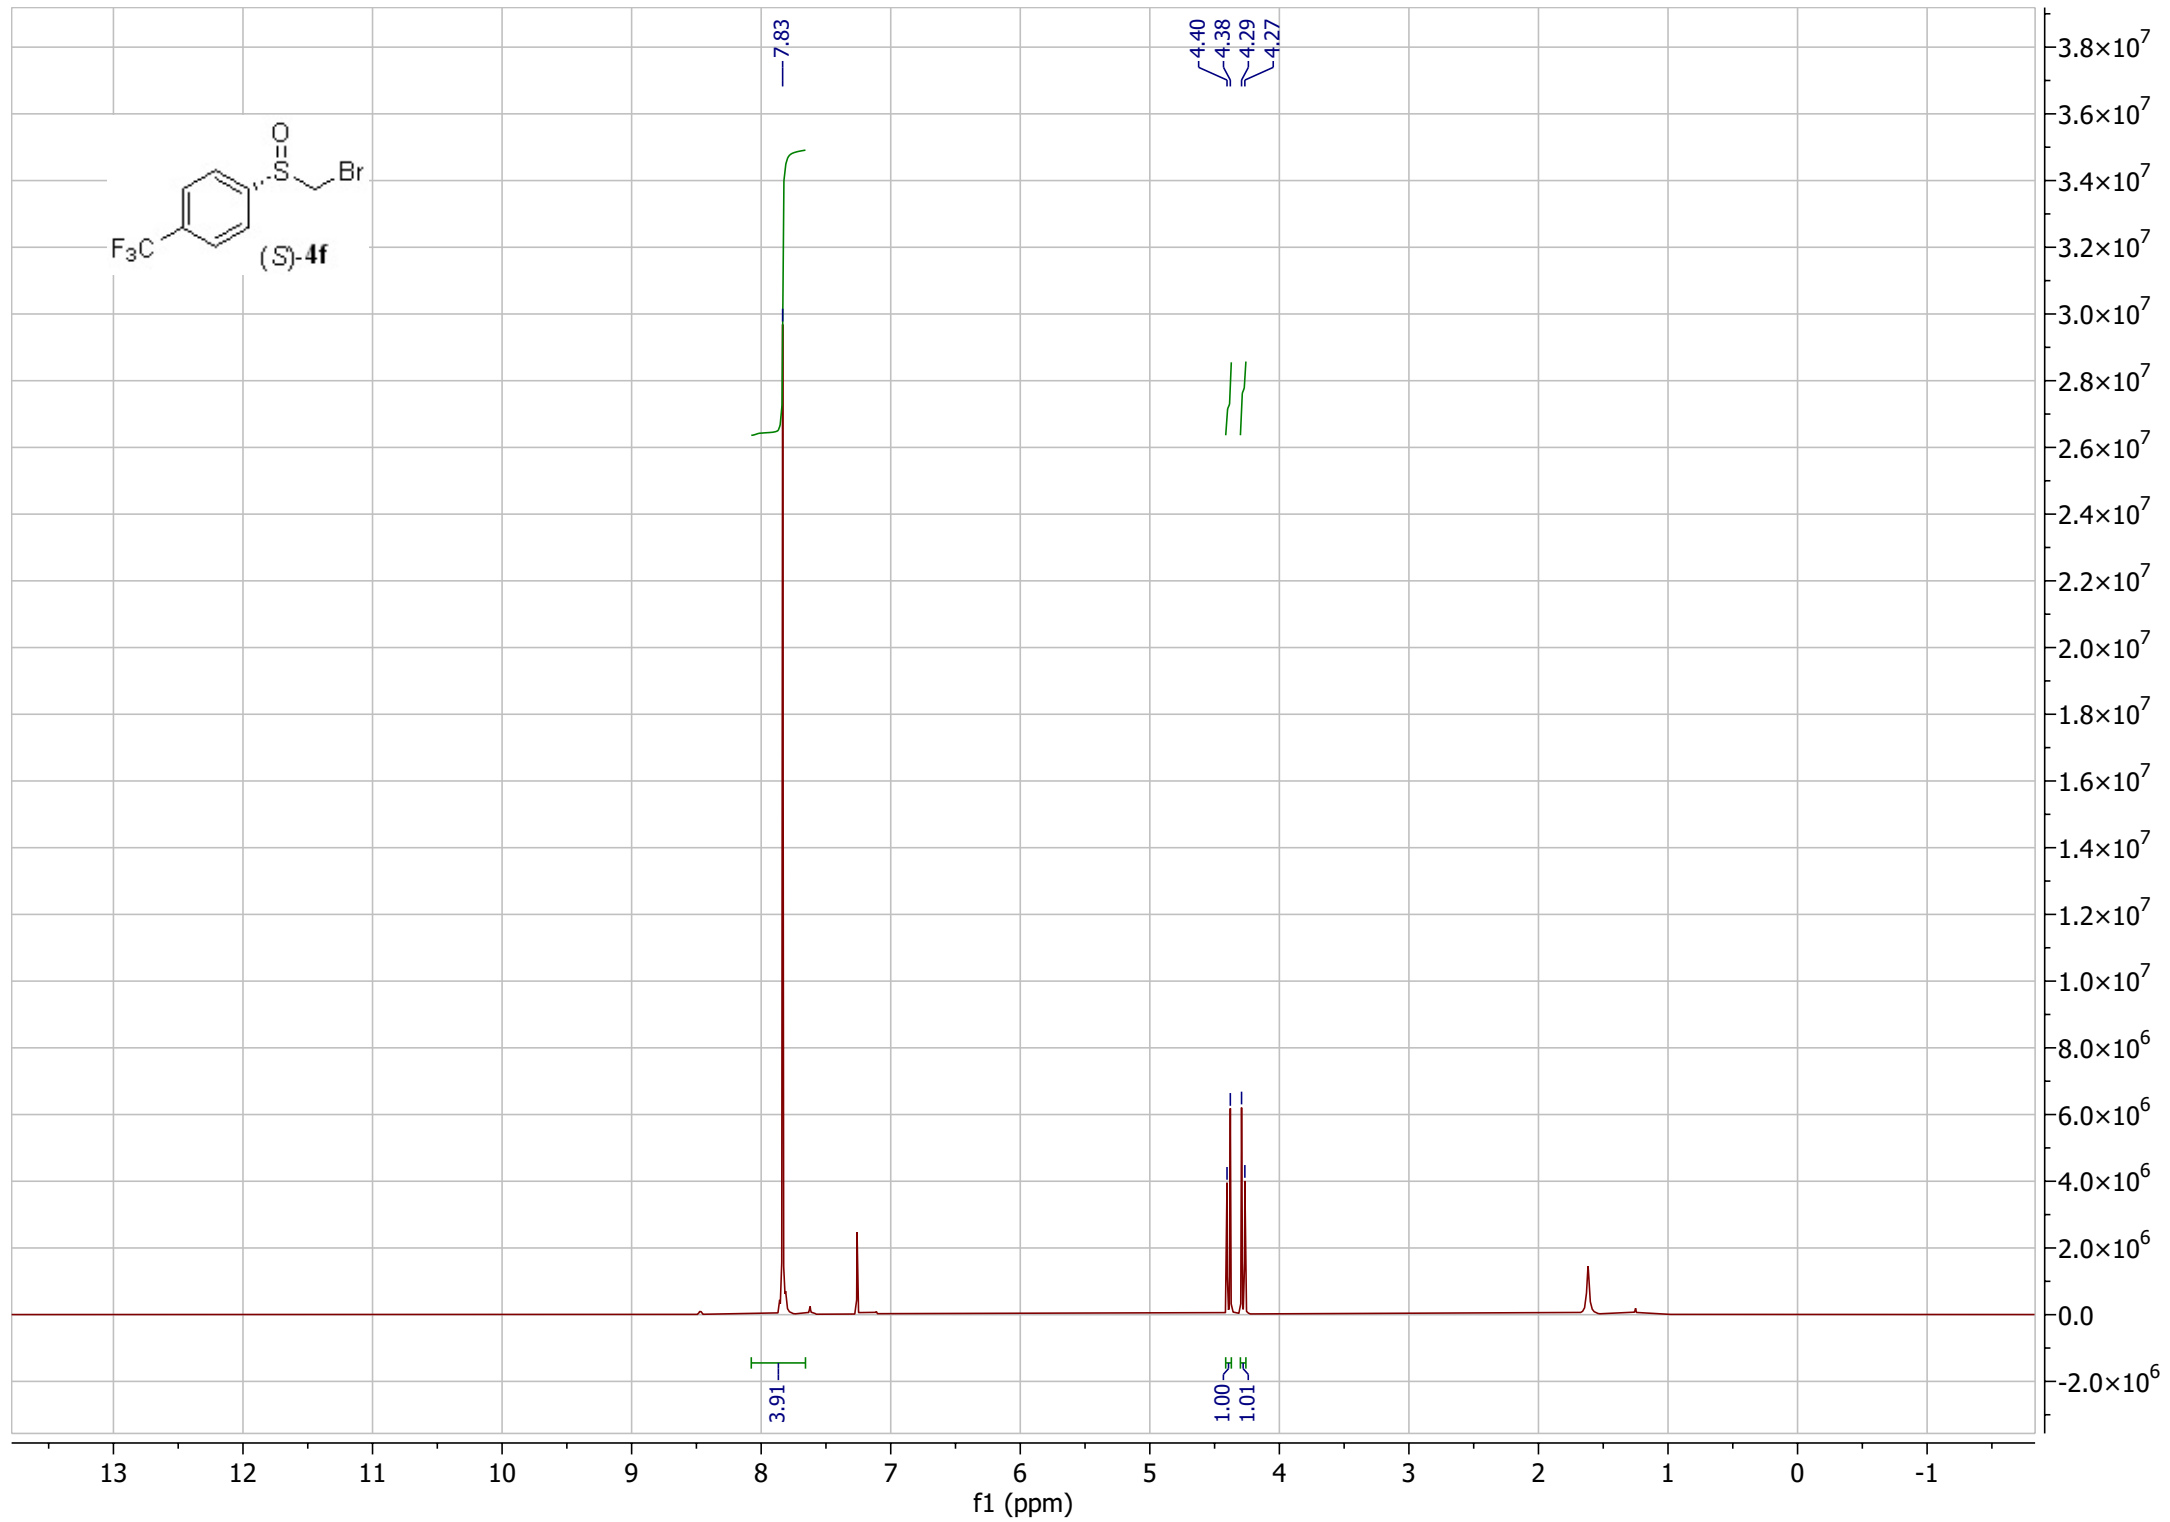

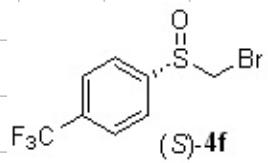

145.90  
134.51  
134.29  
134.07  
133.86  
126.45  
126.43  
126.40  
126.38  
125.56  
122.57

48.54

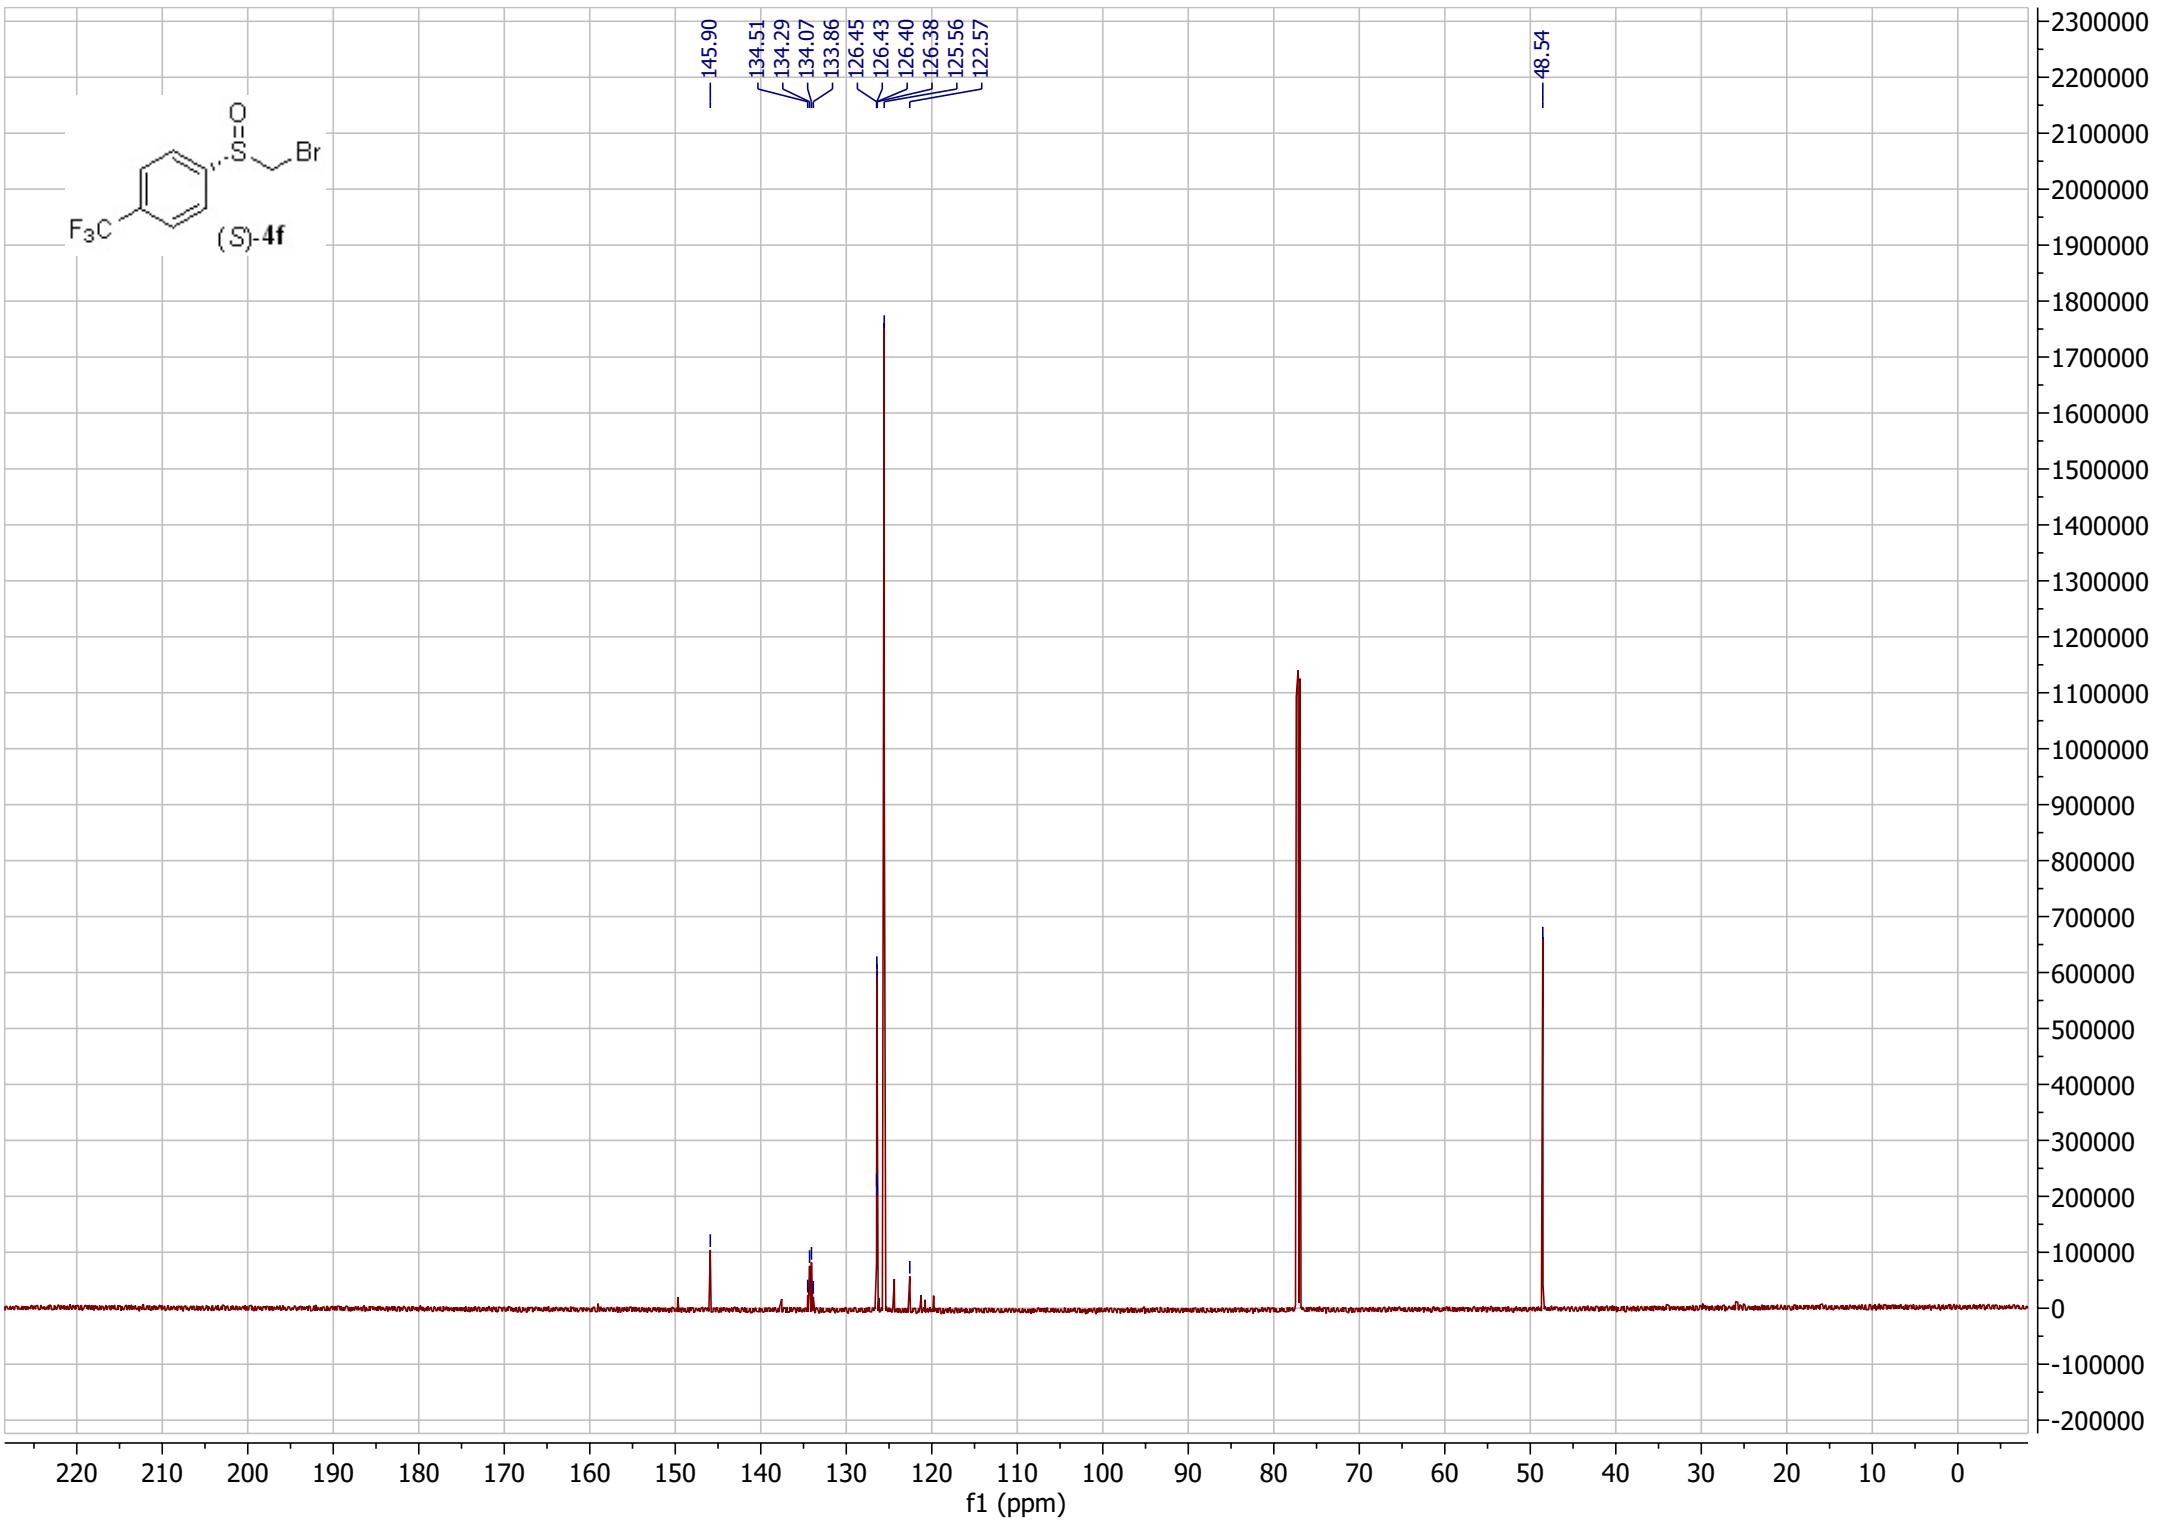

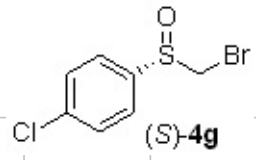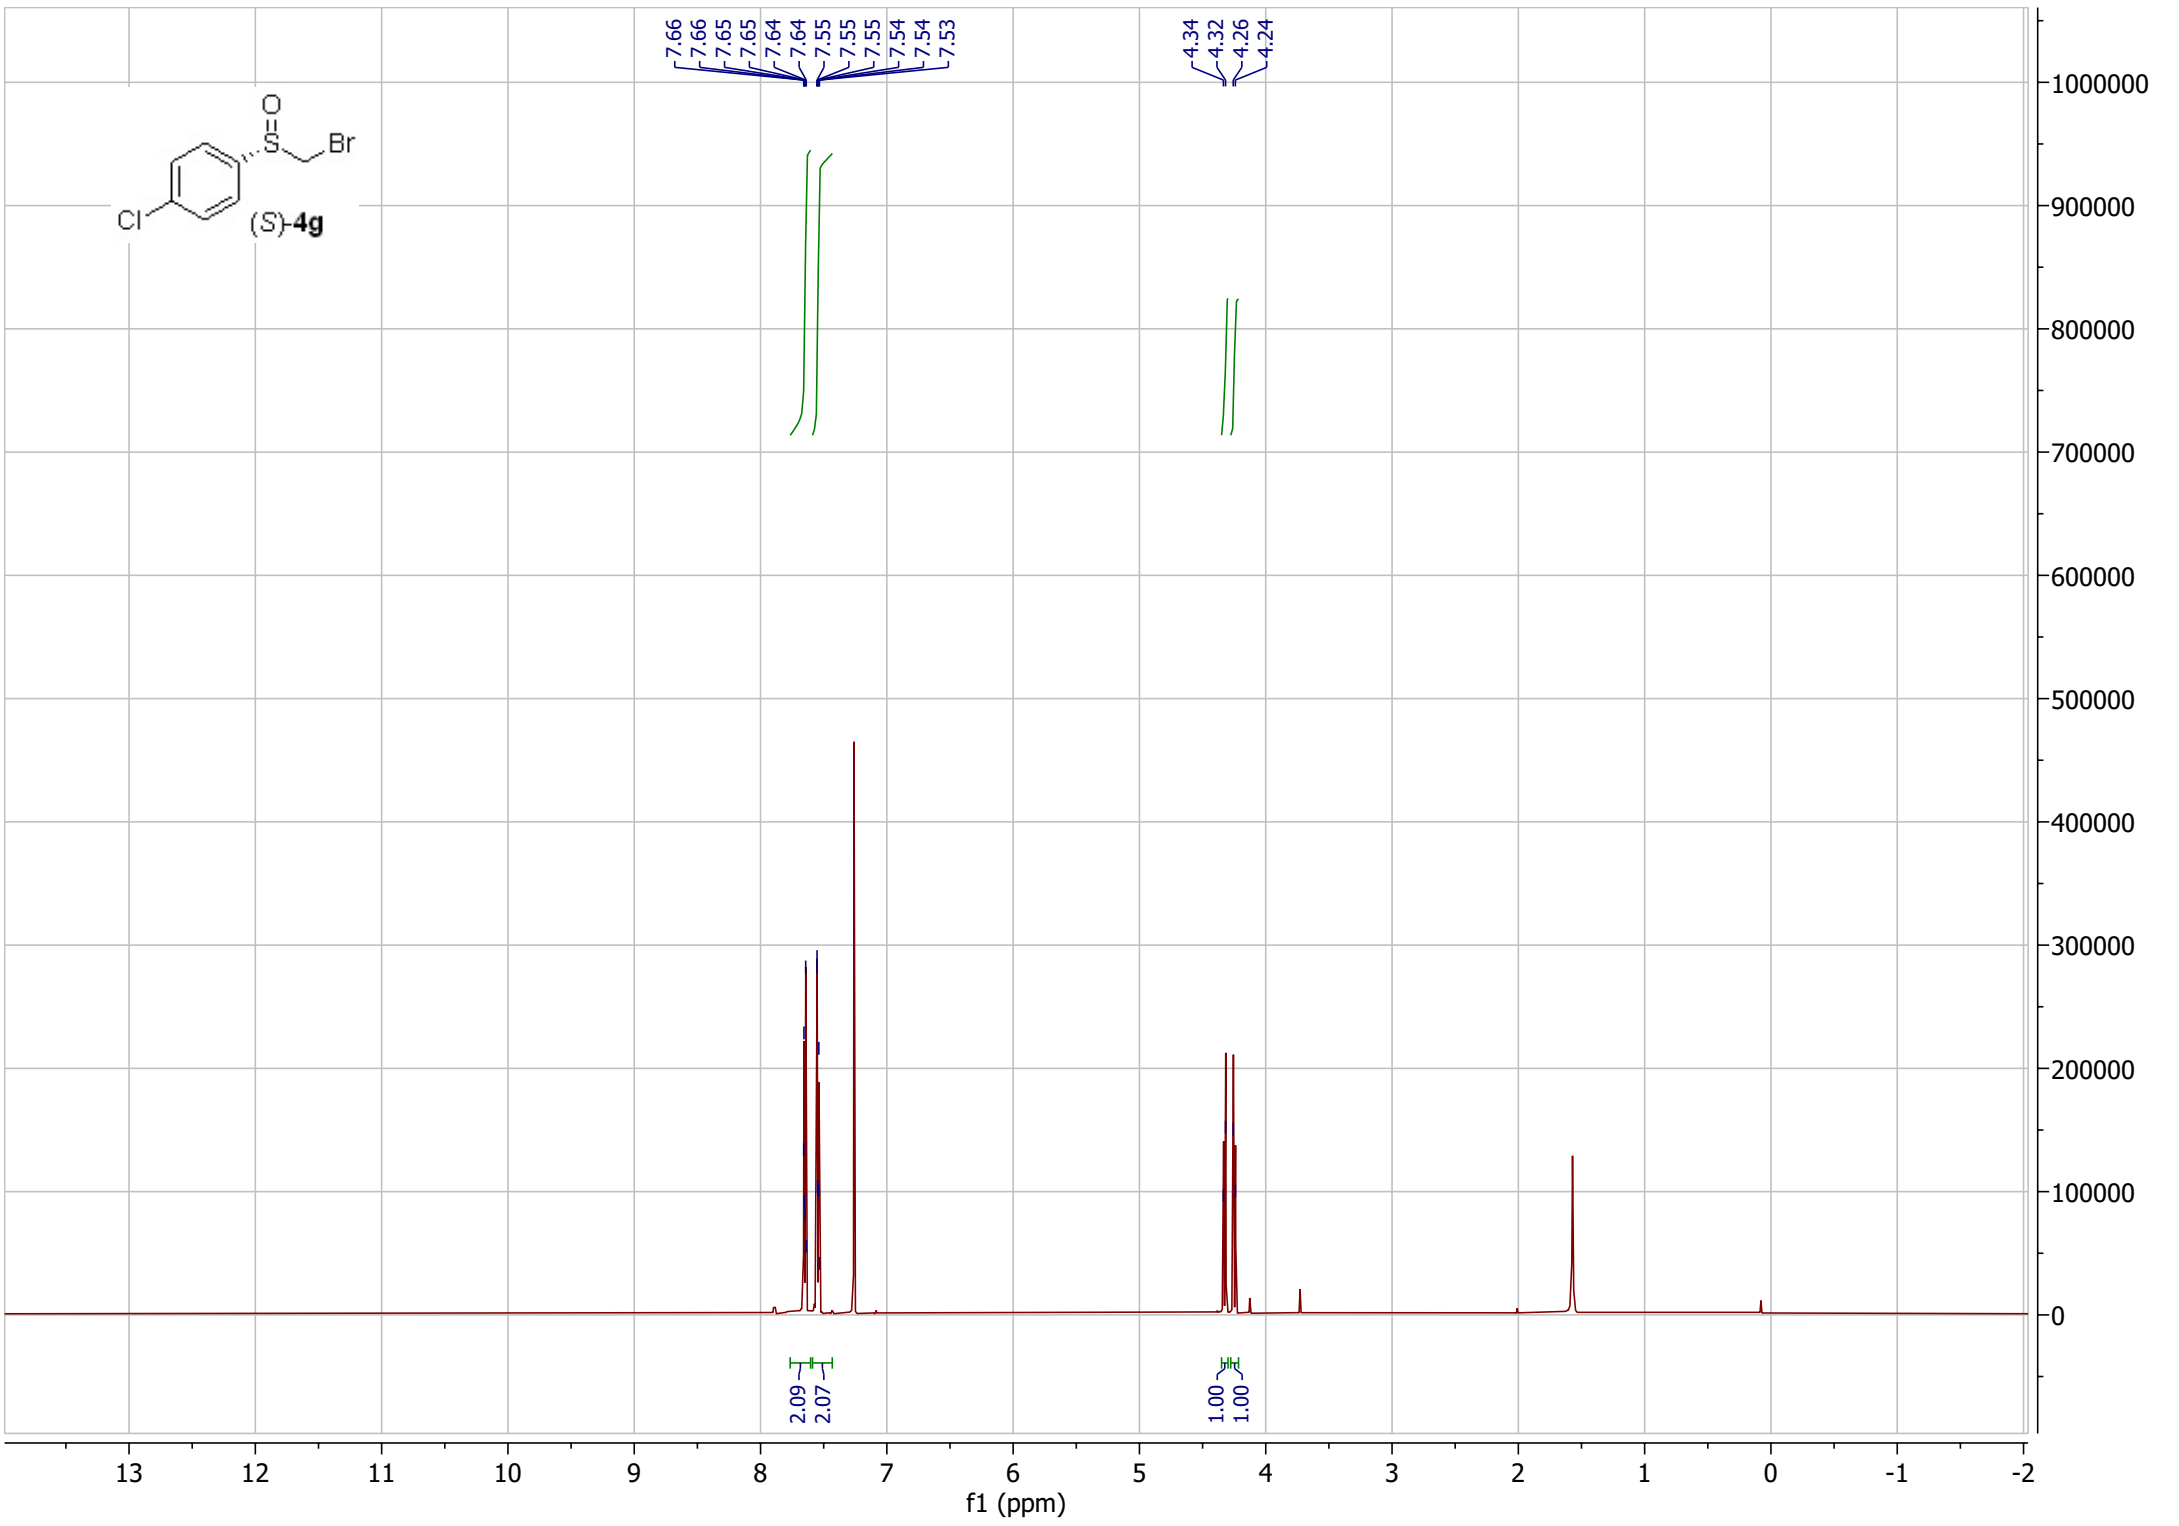

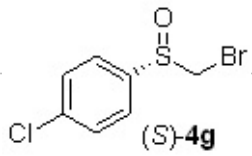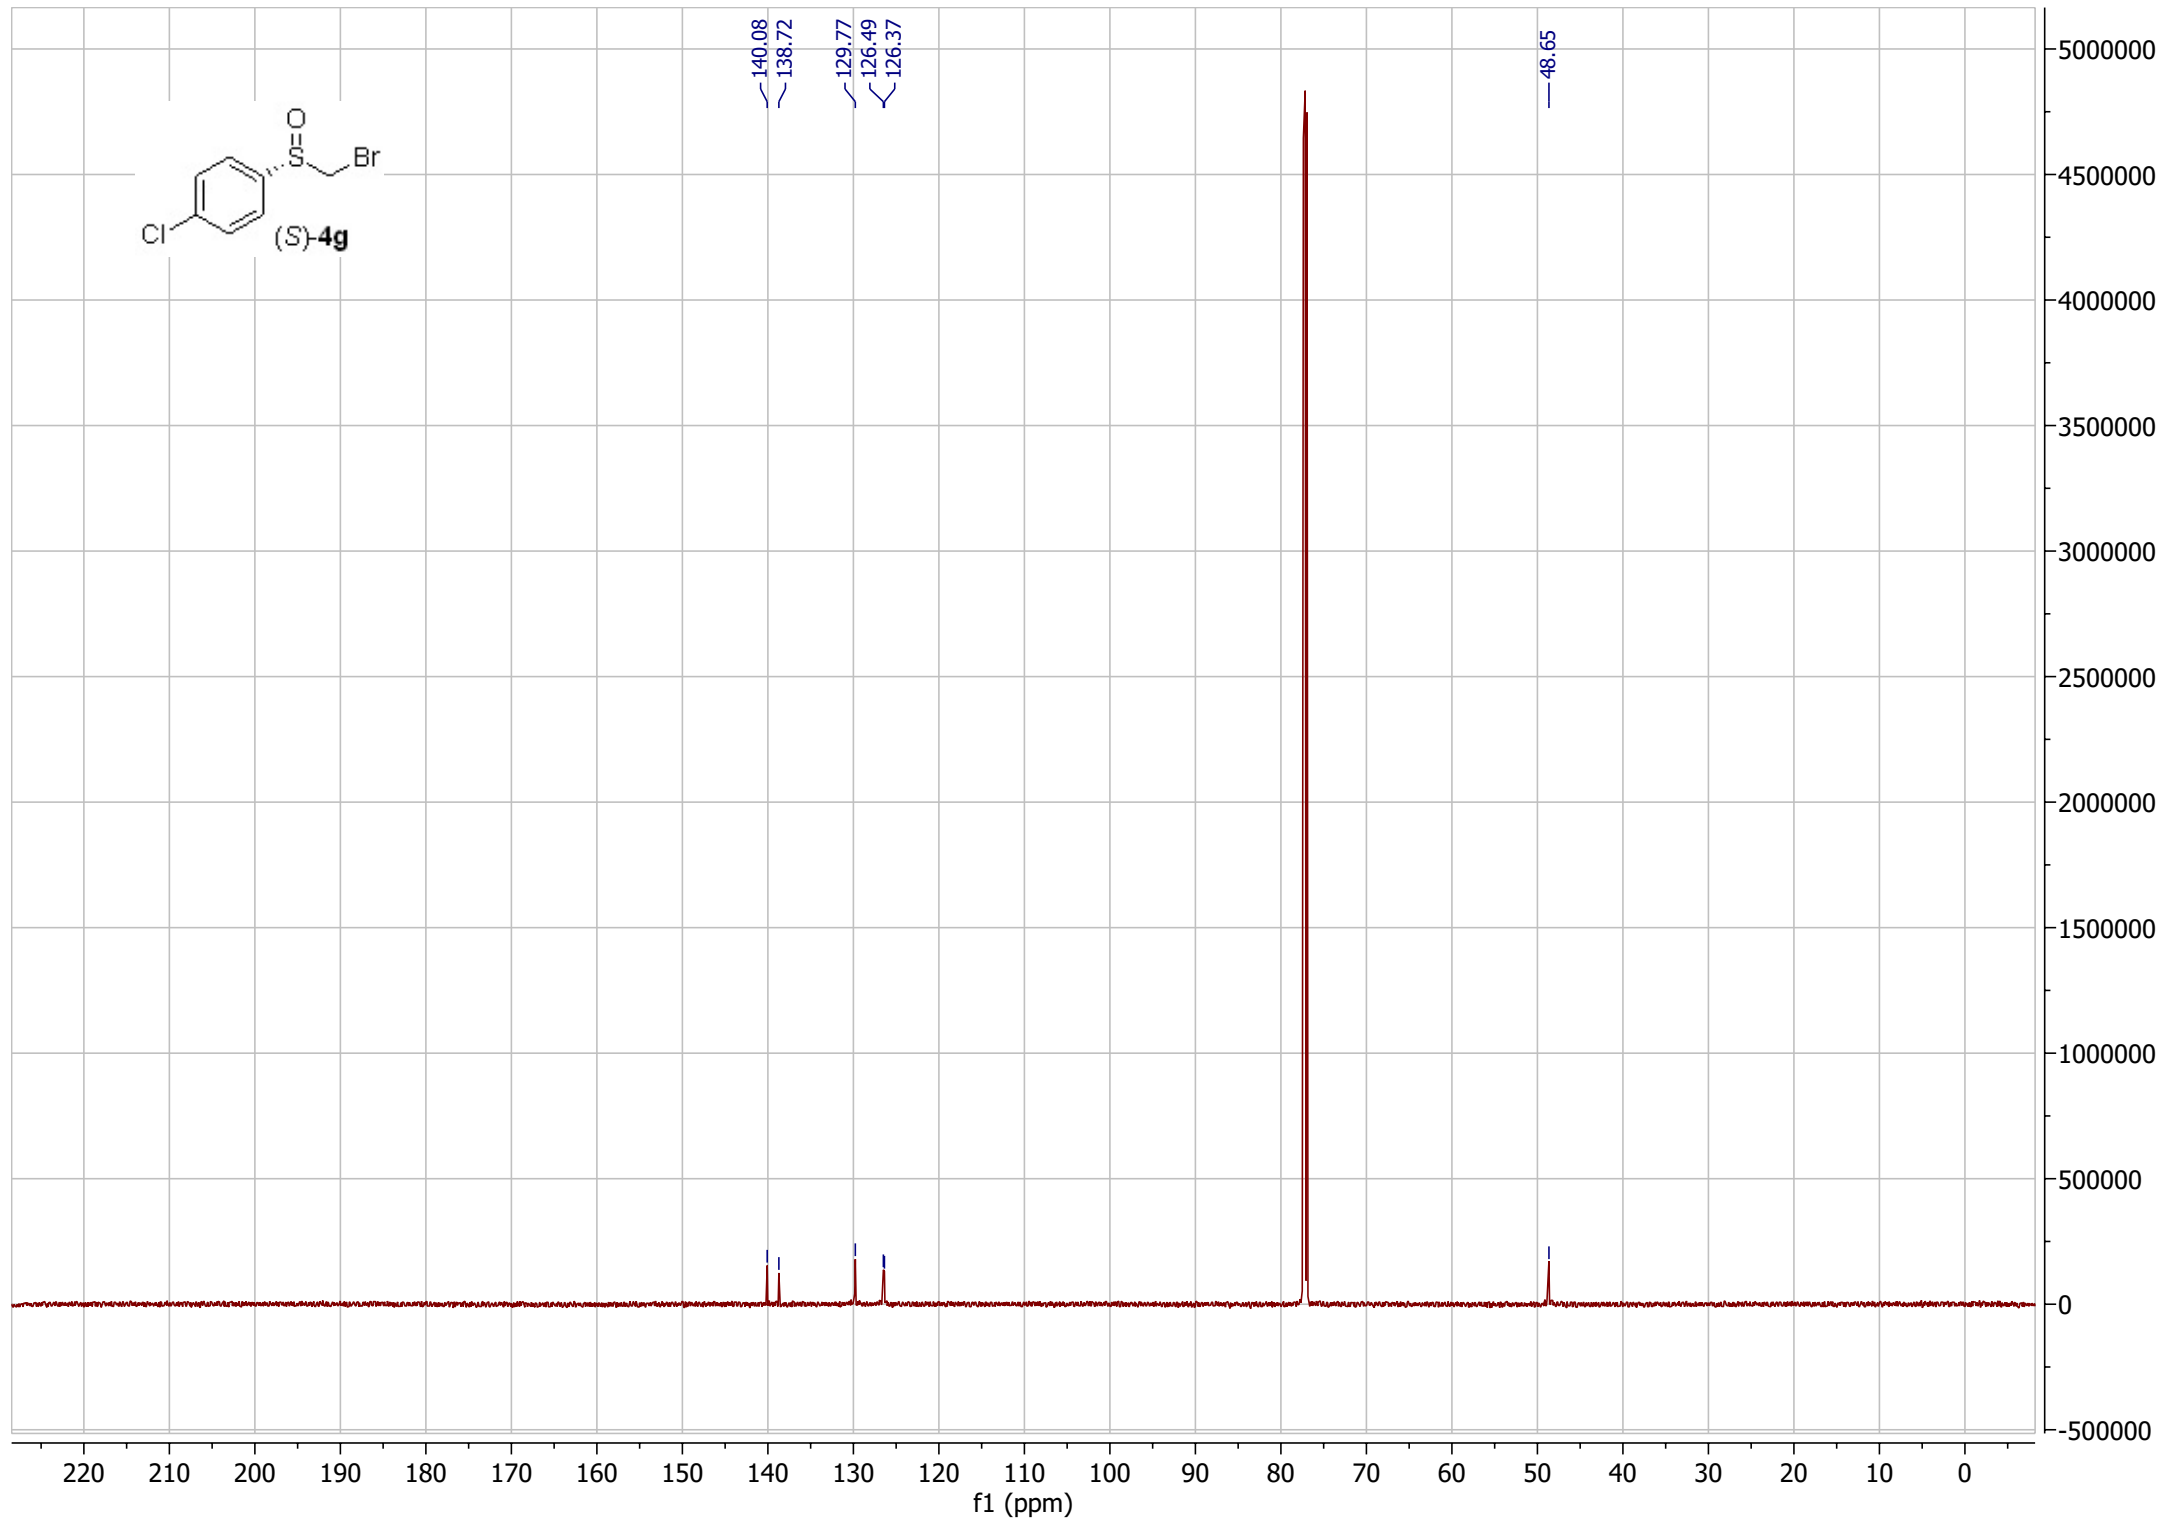

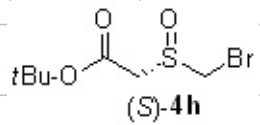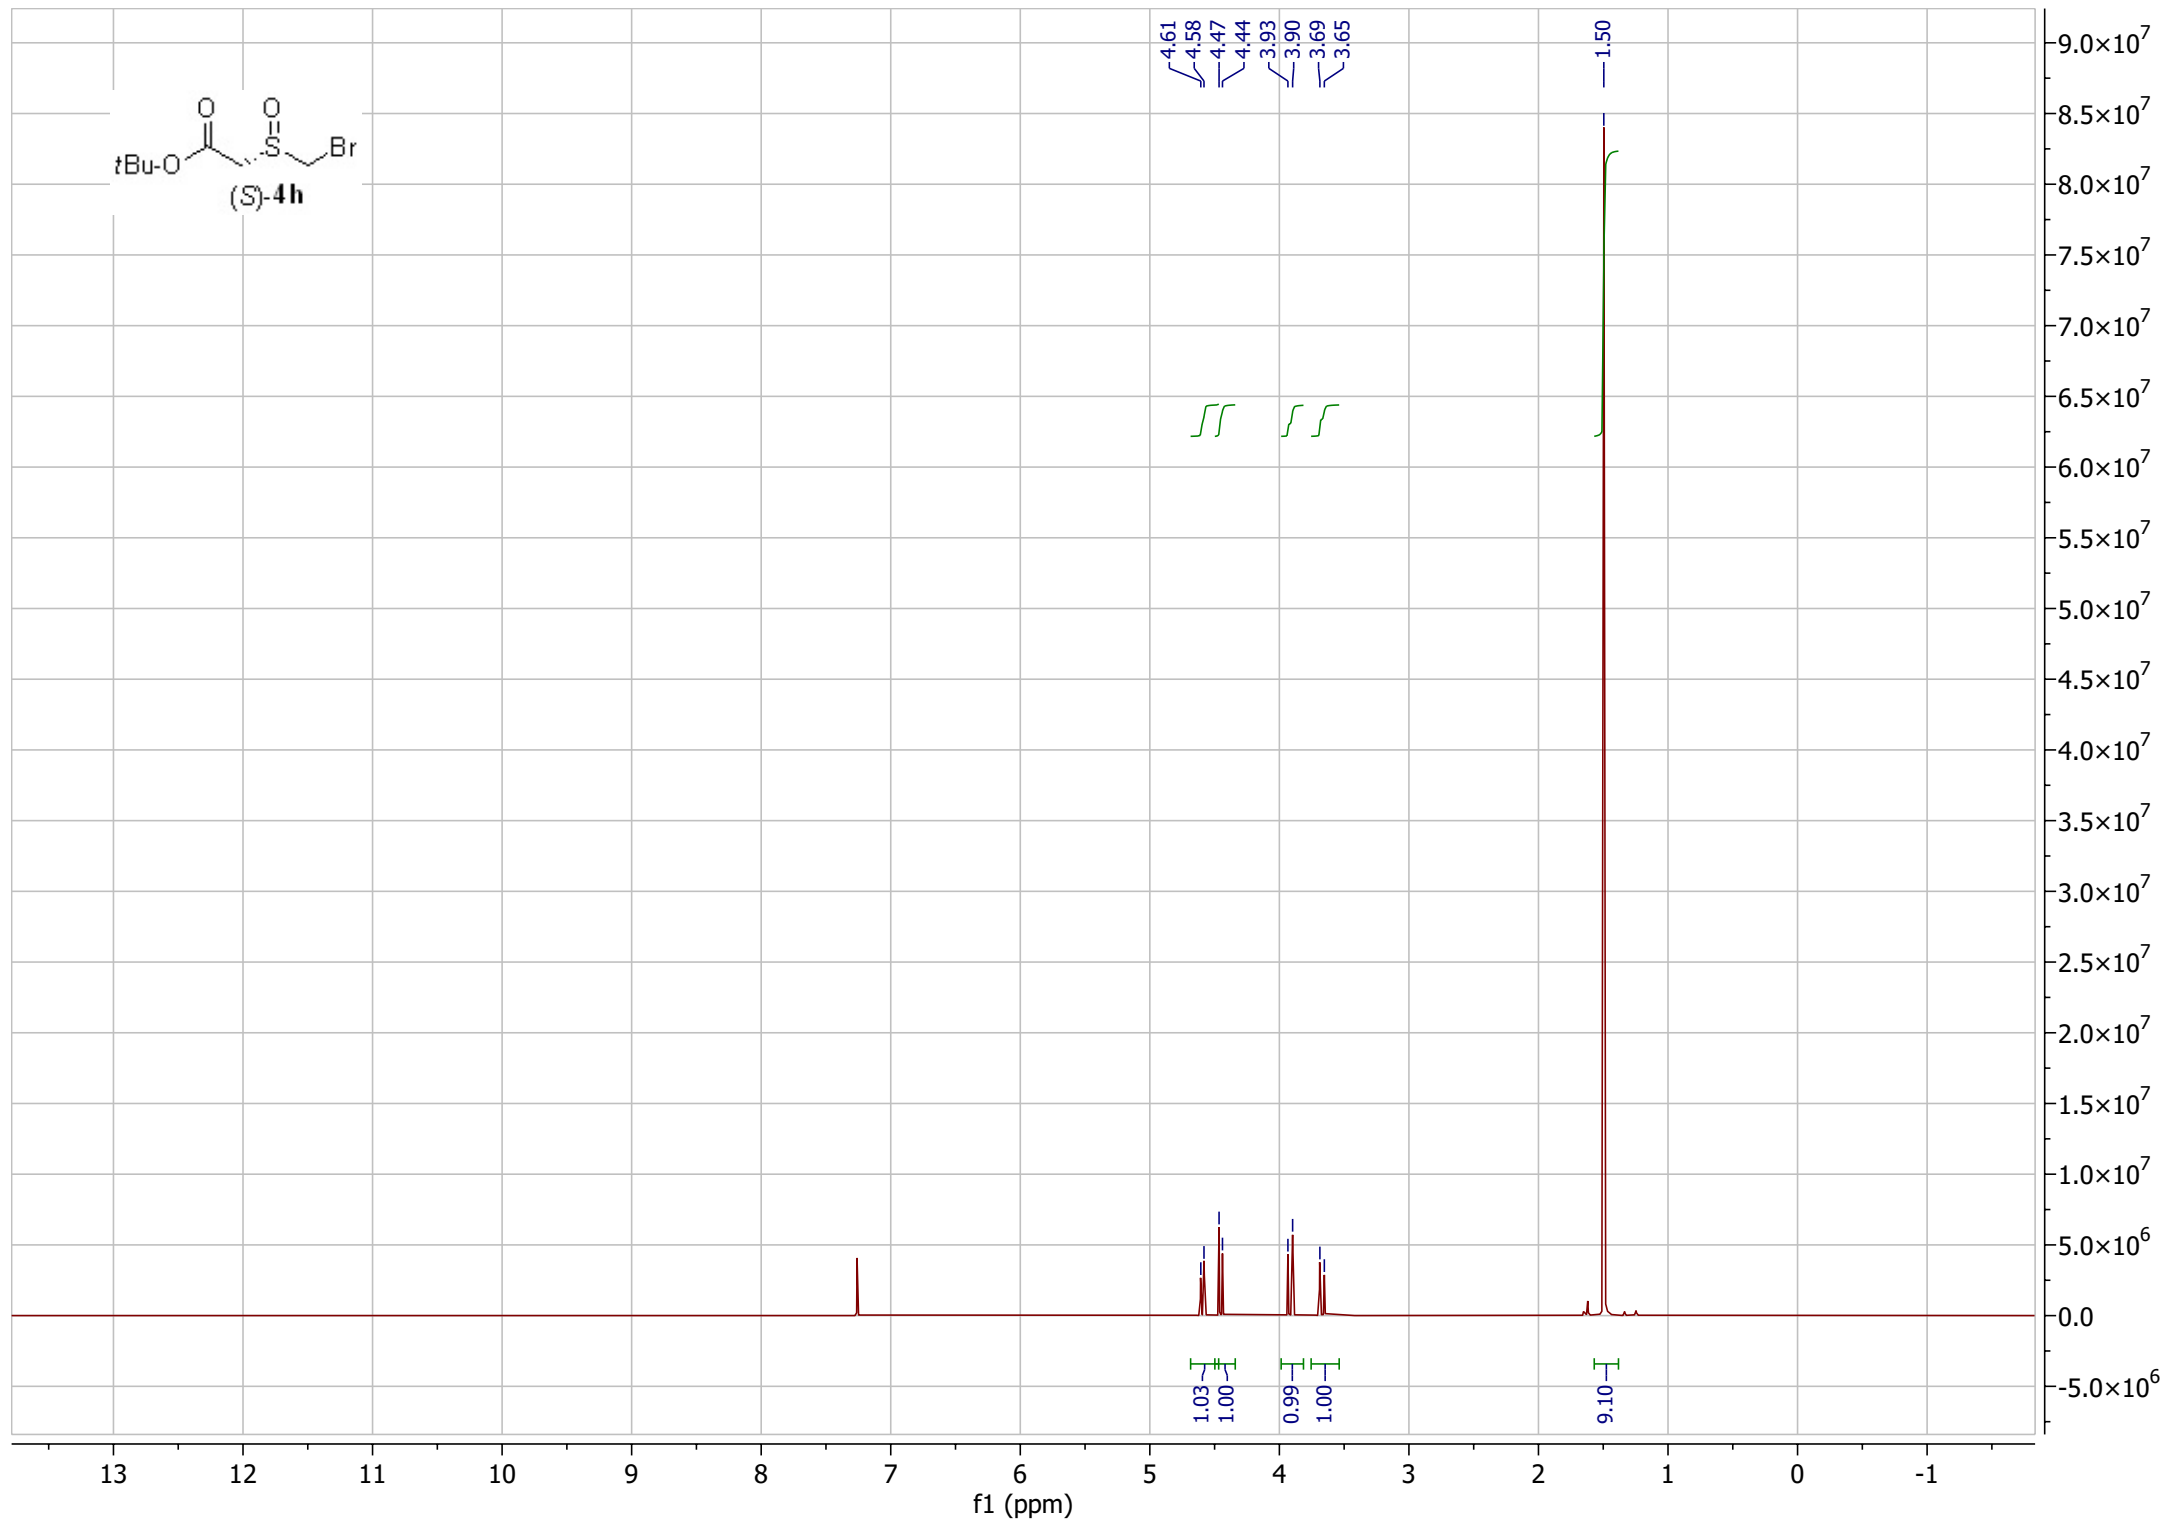

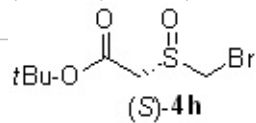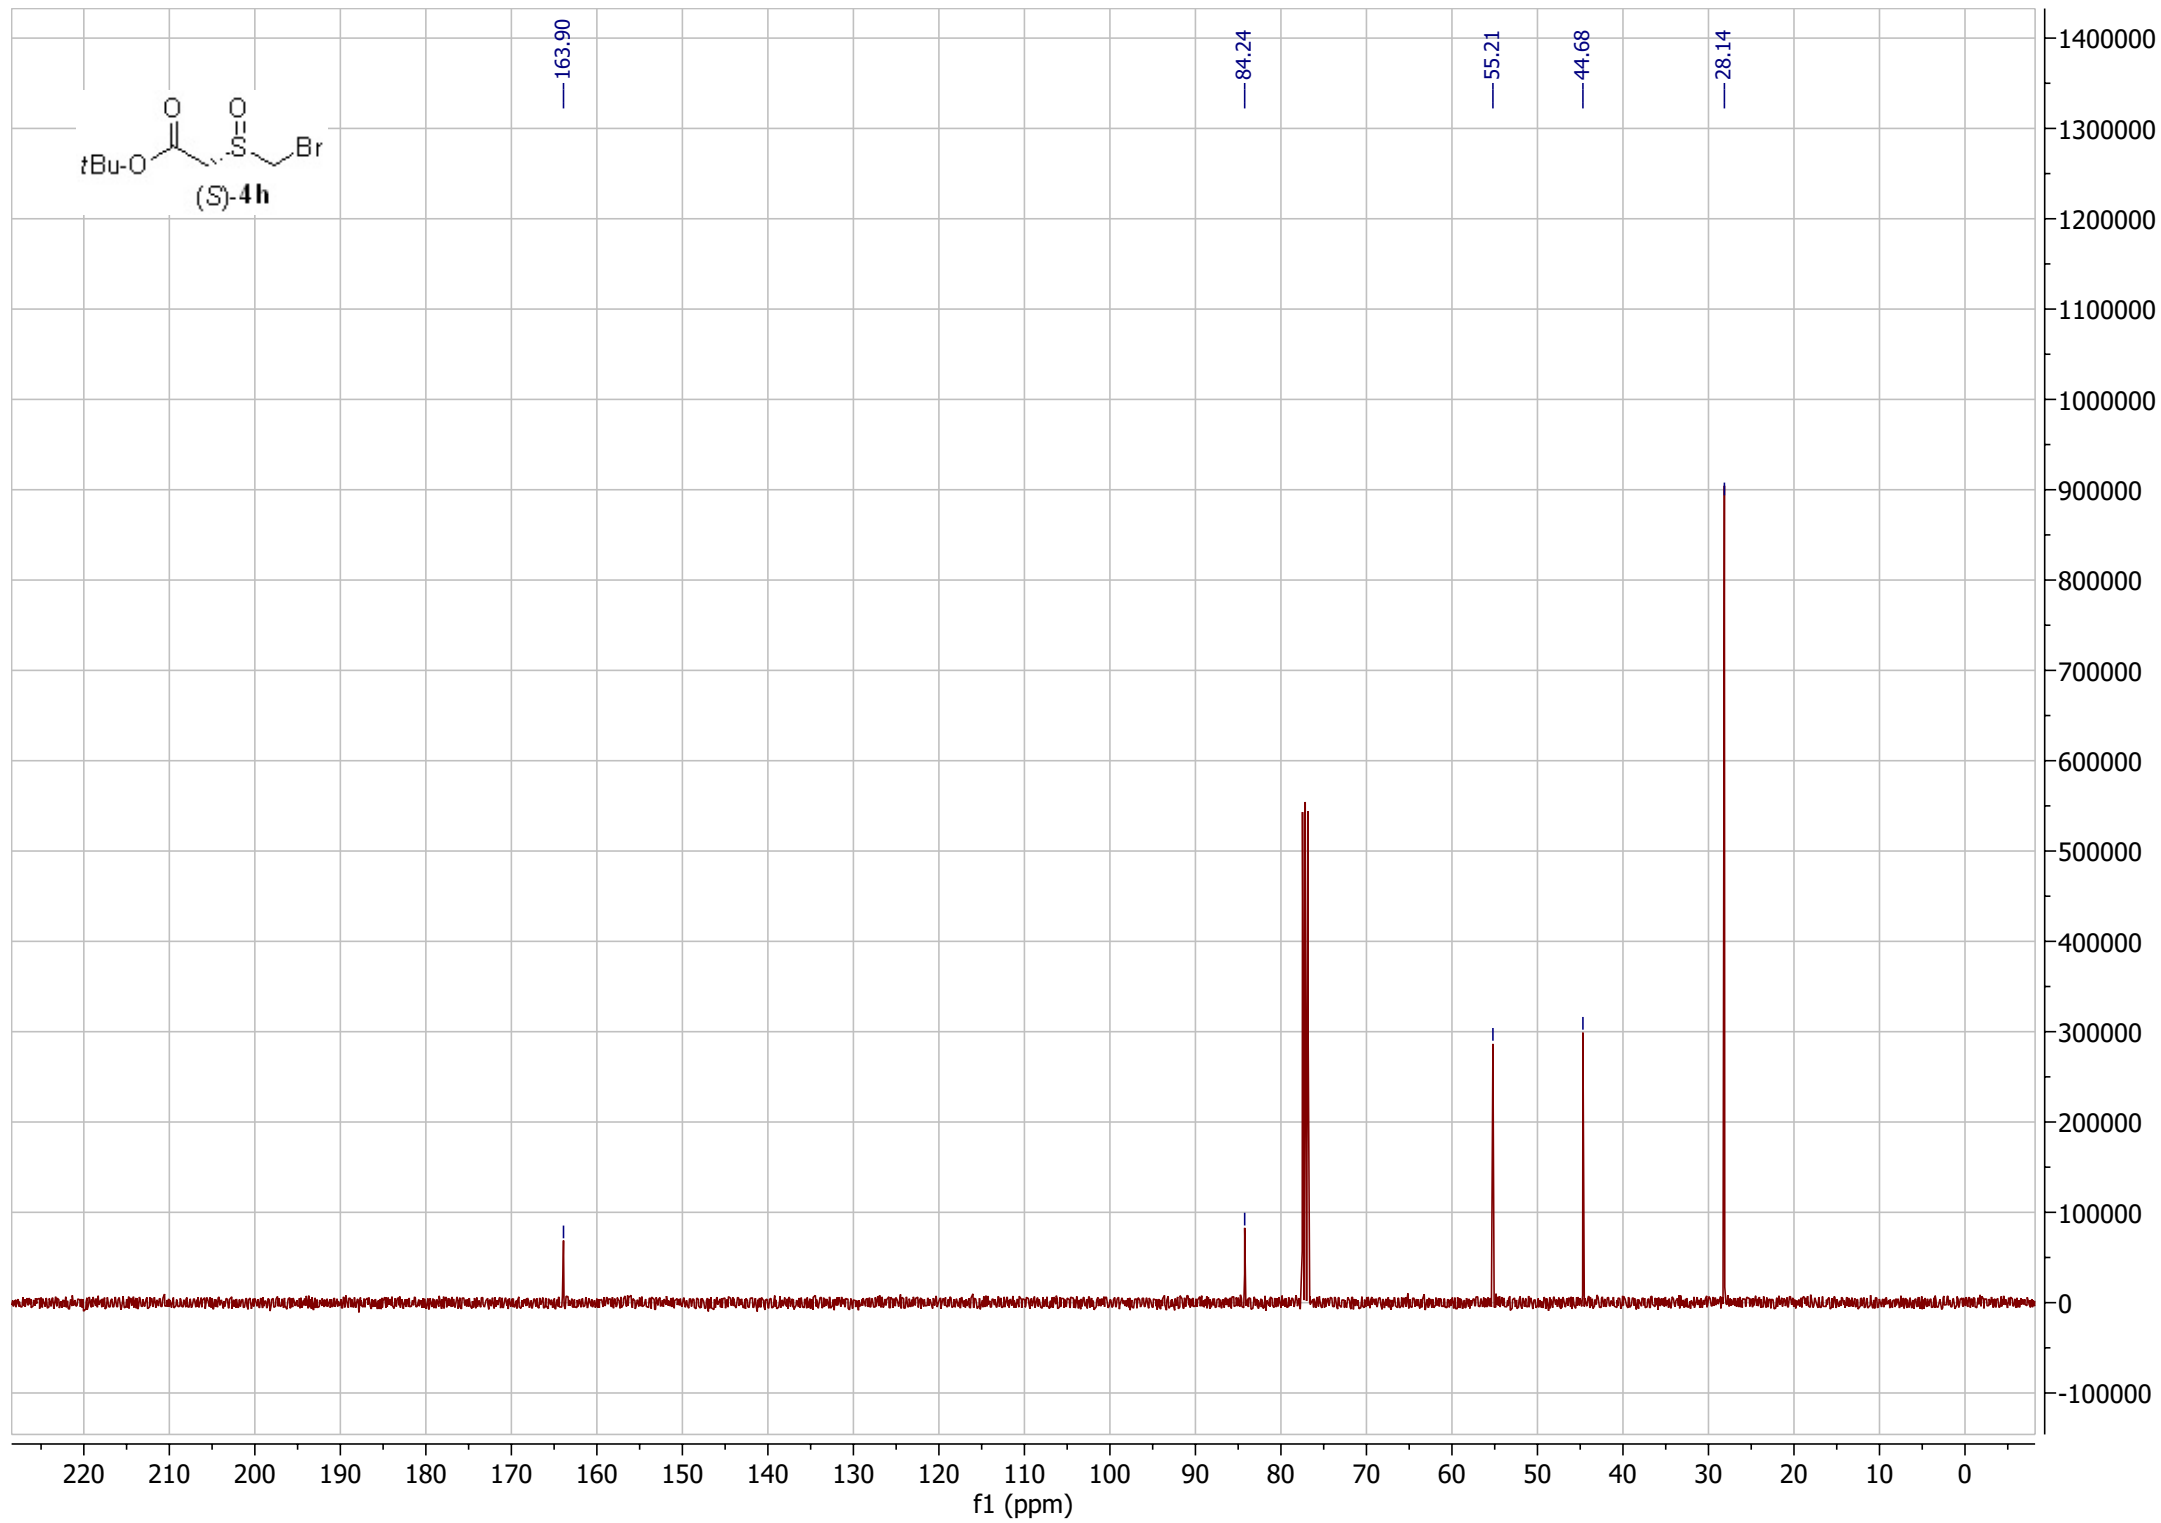

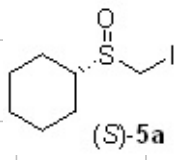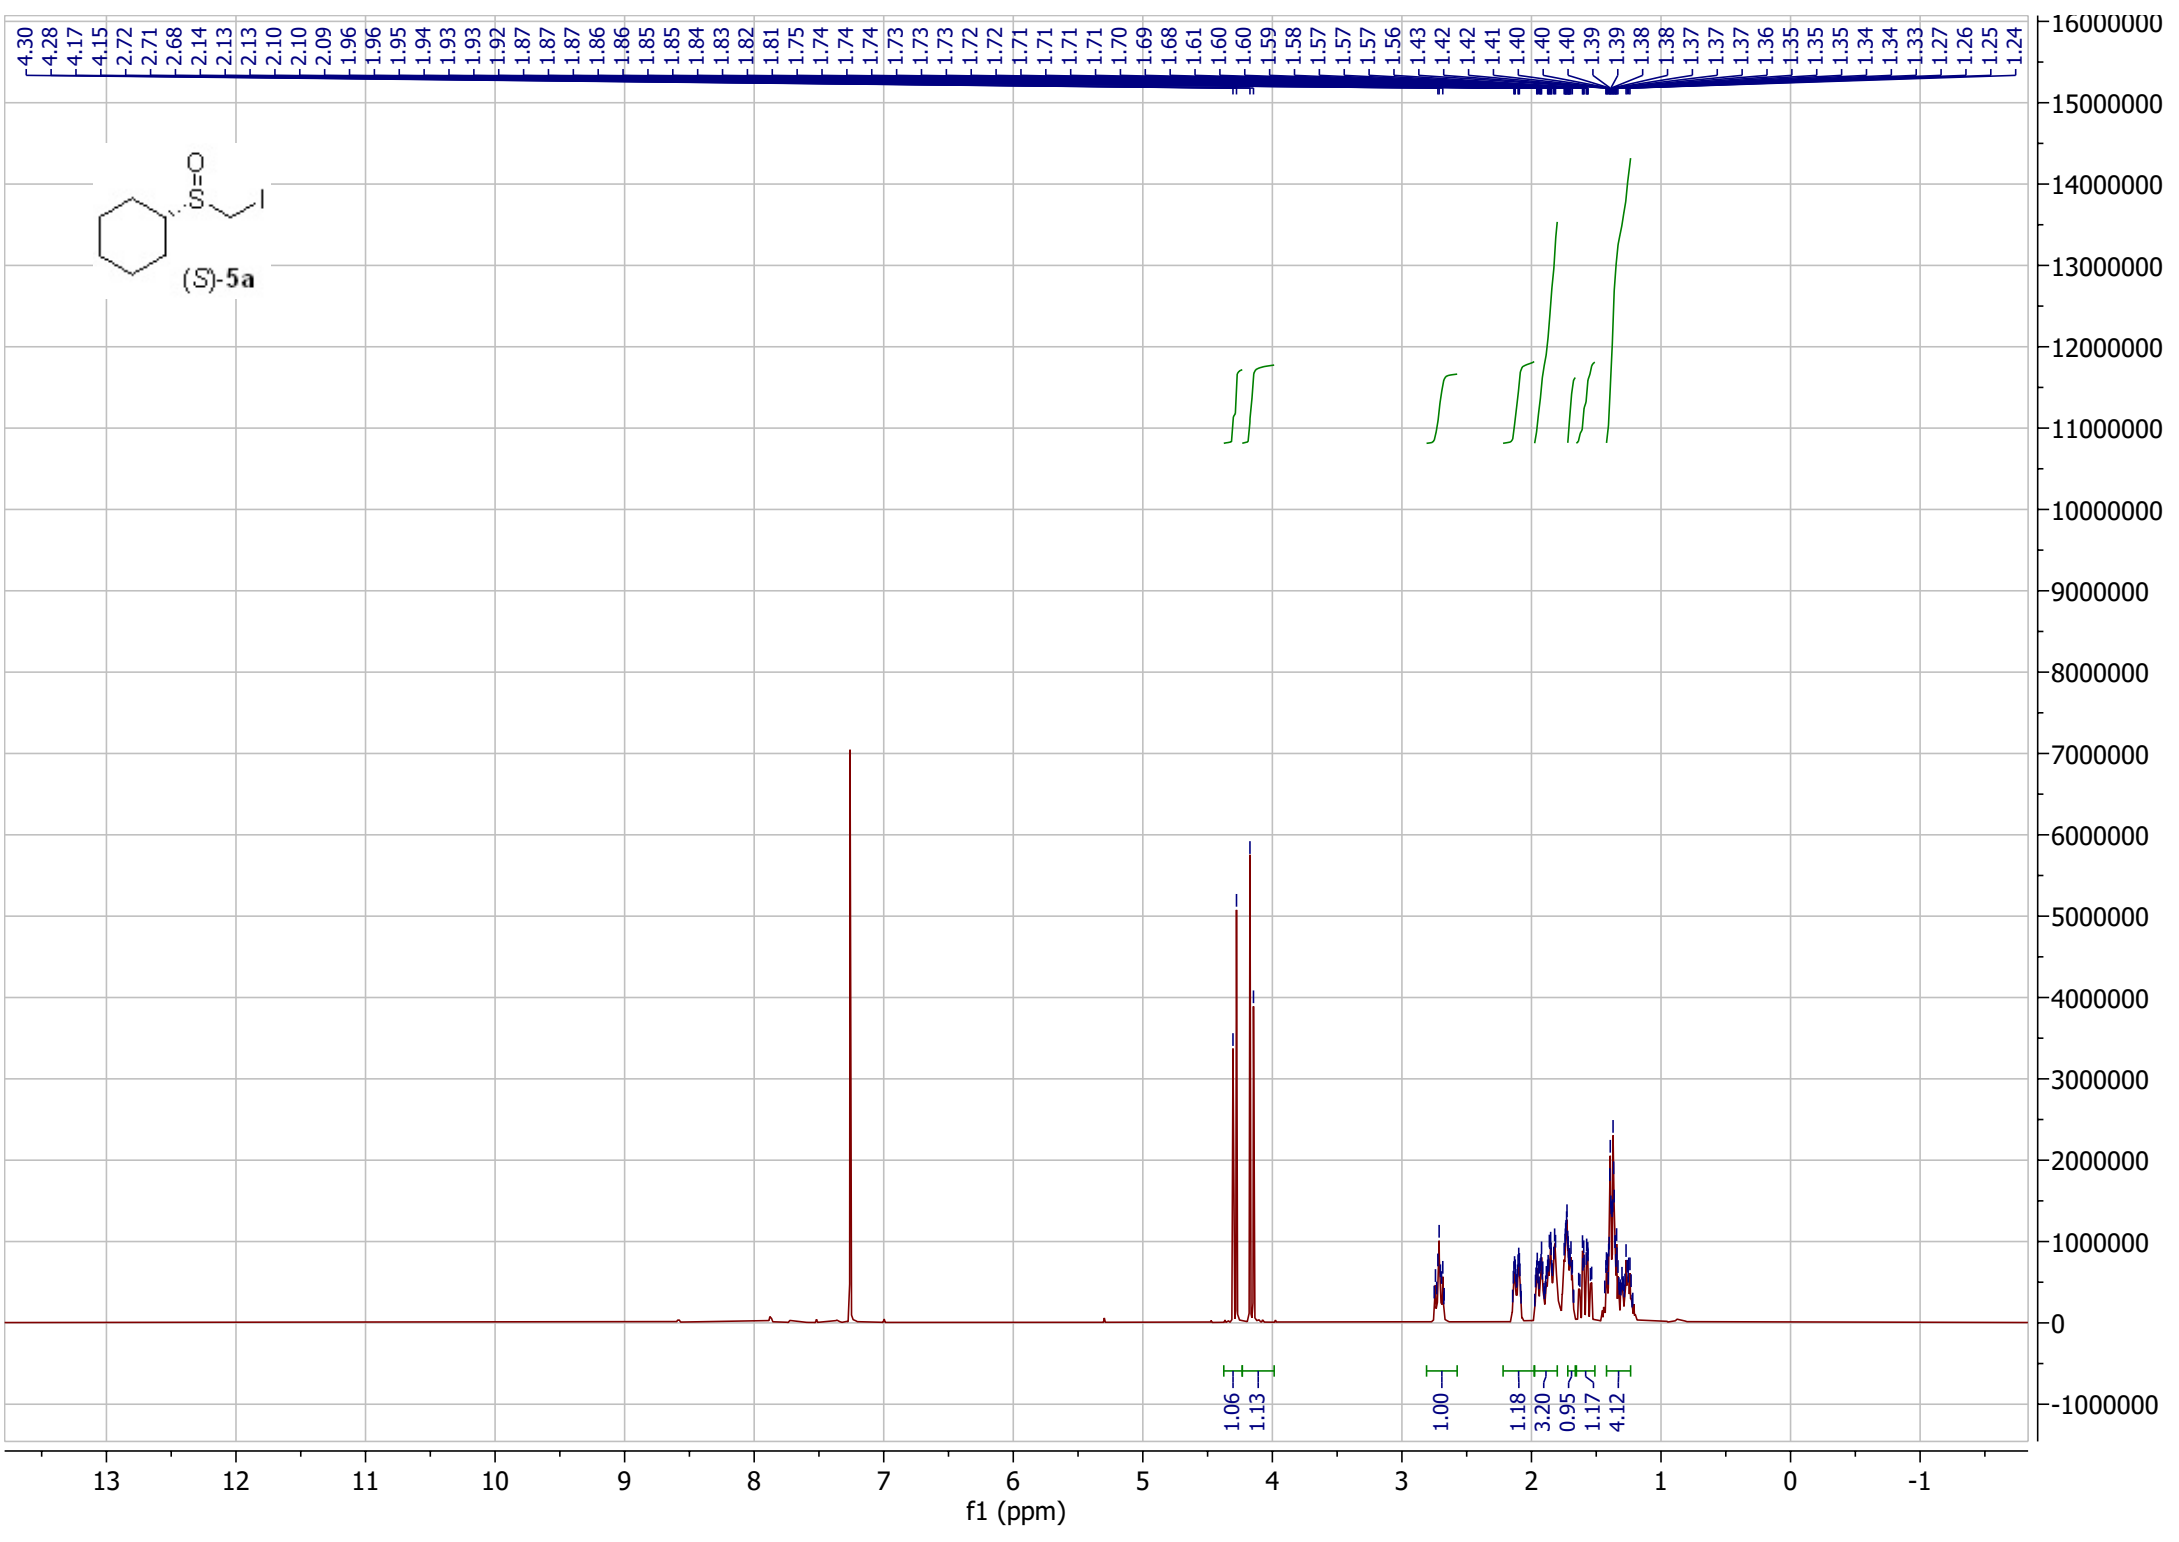

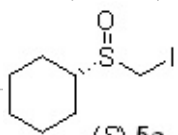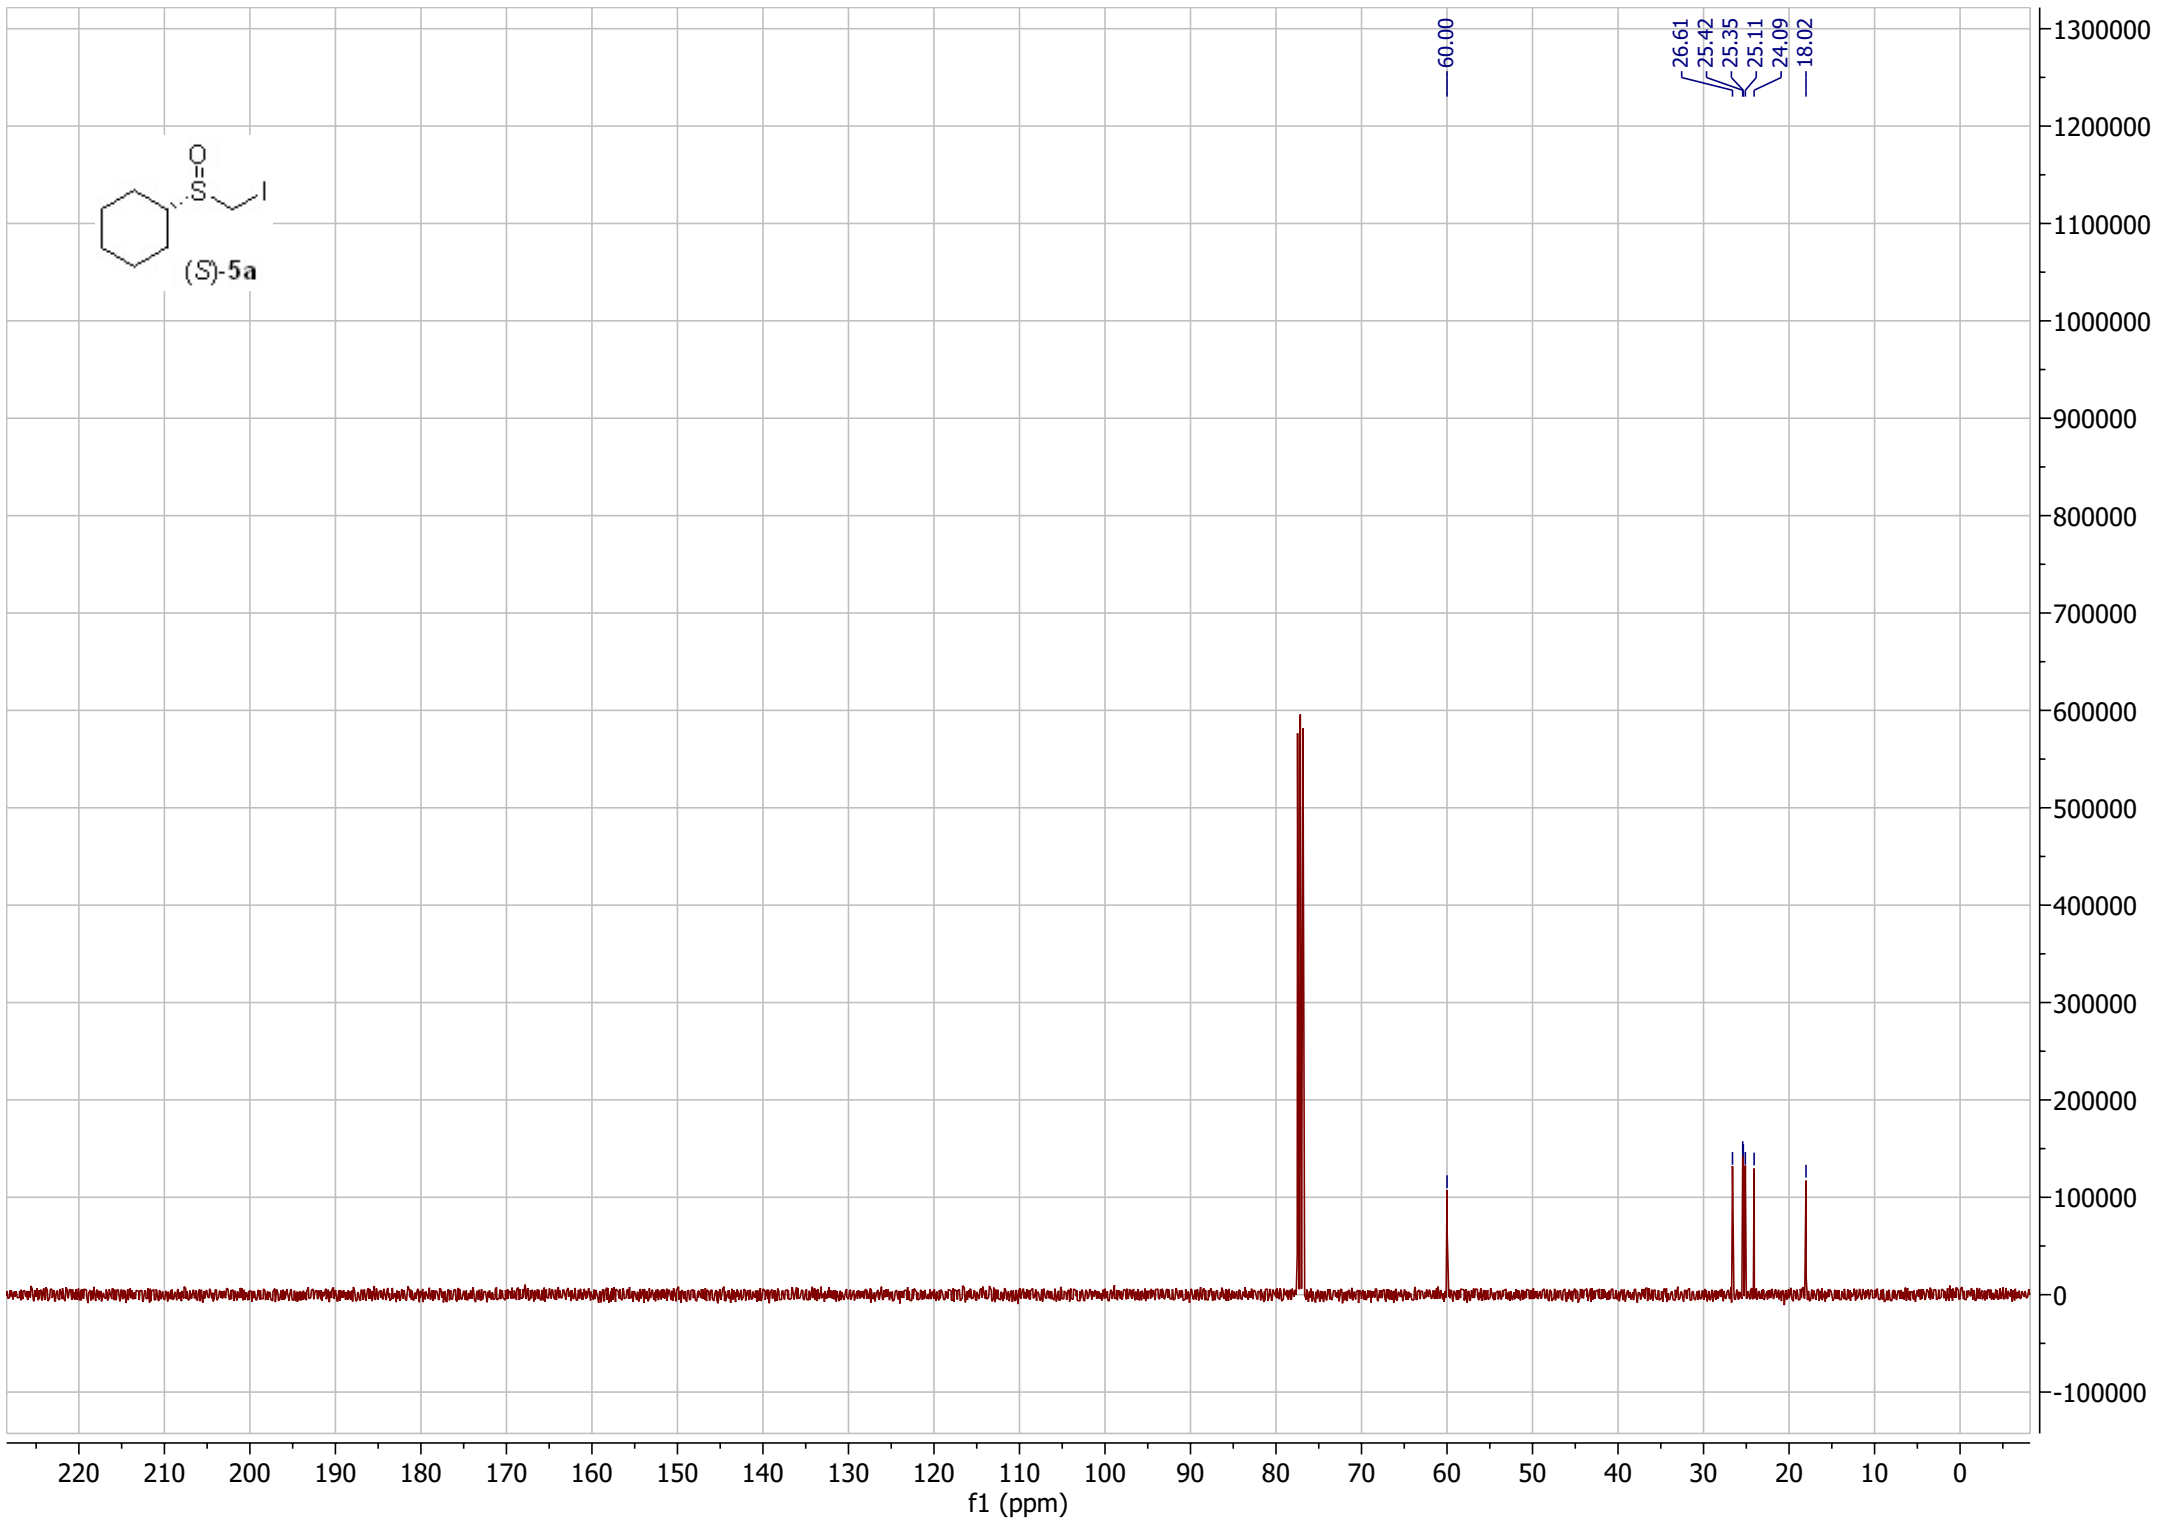



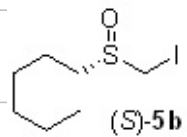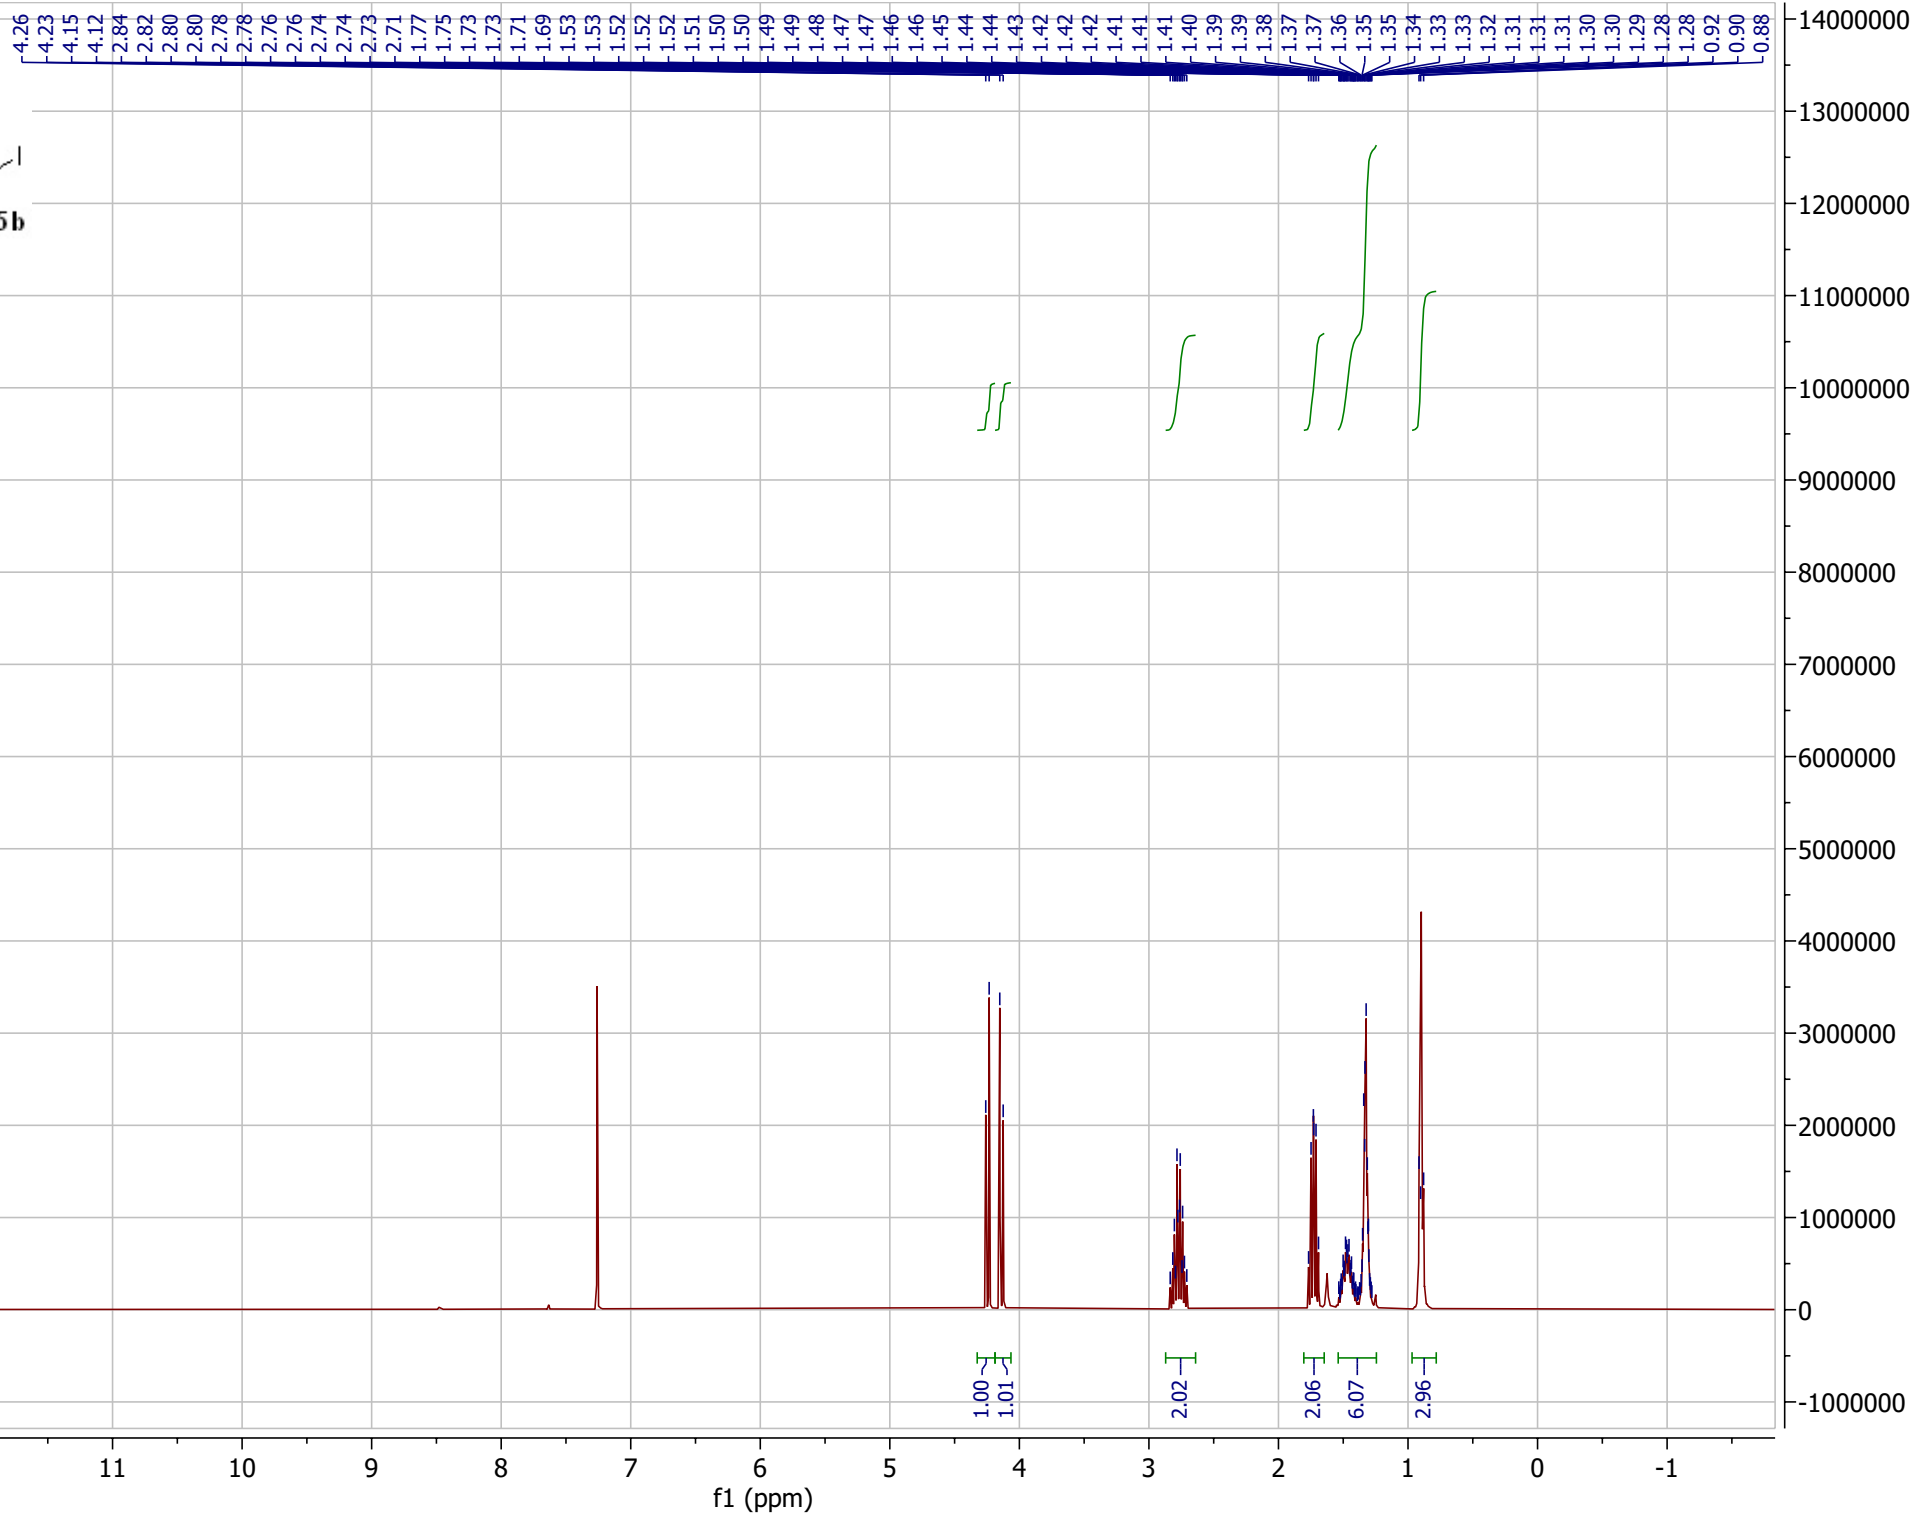

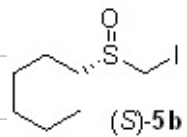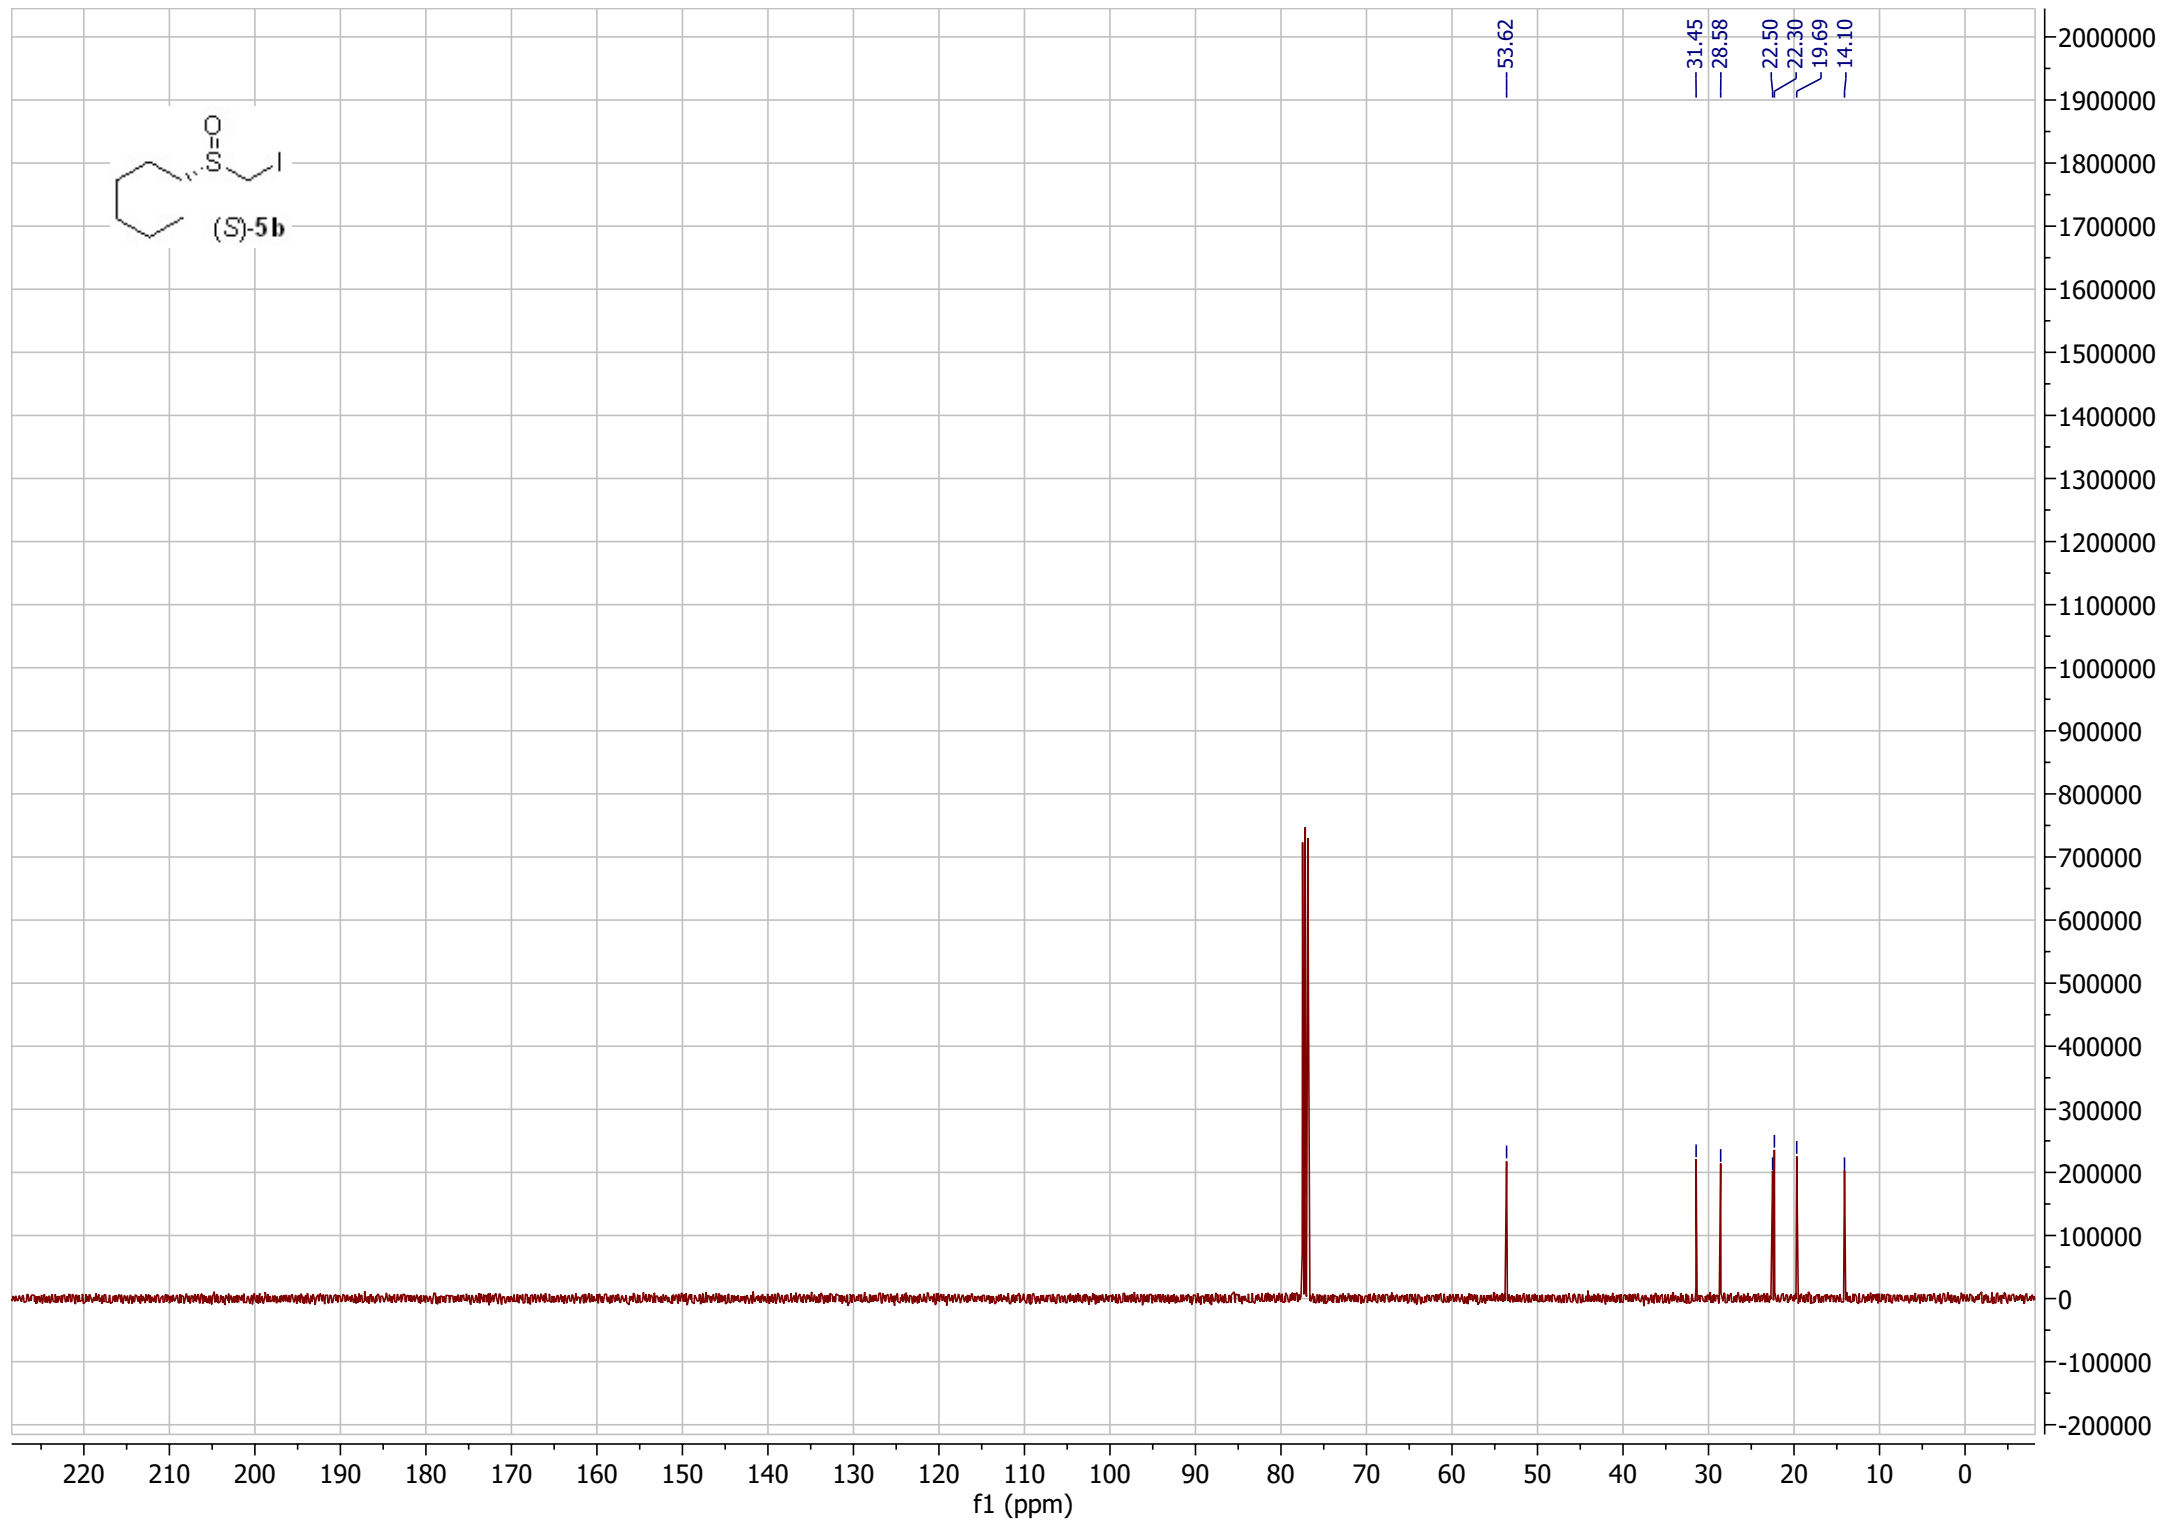

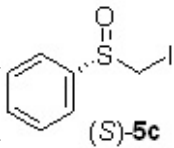

7.67  
7.67  
7.66  
7.66  
7.66  
7.65  
7.65  
7.64  
7.58  
7.57  
7.57  
7.56  
7.56  
7.55  
7.55  
7.54  
7.54  
7.53  
7.53  
7.53  
7.52  
7.52  
7.52

4.42  
4.39  
4.18  
4.15

1.73  
2.72

1.00  
1.00

13 12 11 10 9 8 7 6 5 4 3 2 1 0 -1

f1 (ppm)

18000000  
17000000  
16000000  
15000000  
14000000  
13000000  
12000000  
11000000  
10000000  
9000000  
8000000  
7000000  
6000000  
5000000  
4000000  
3000000  
2000000  
1000000  
0  
-1000000

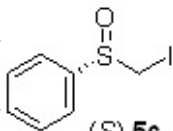

(S)-5c

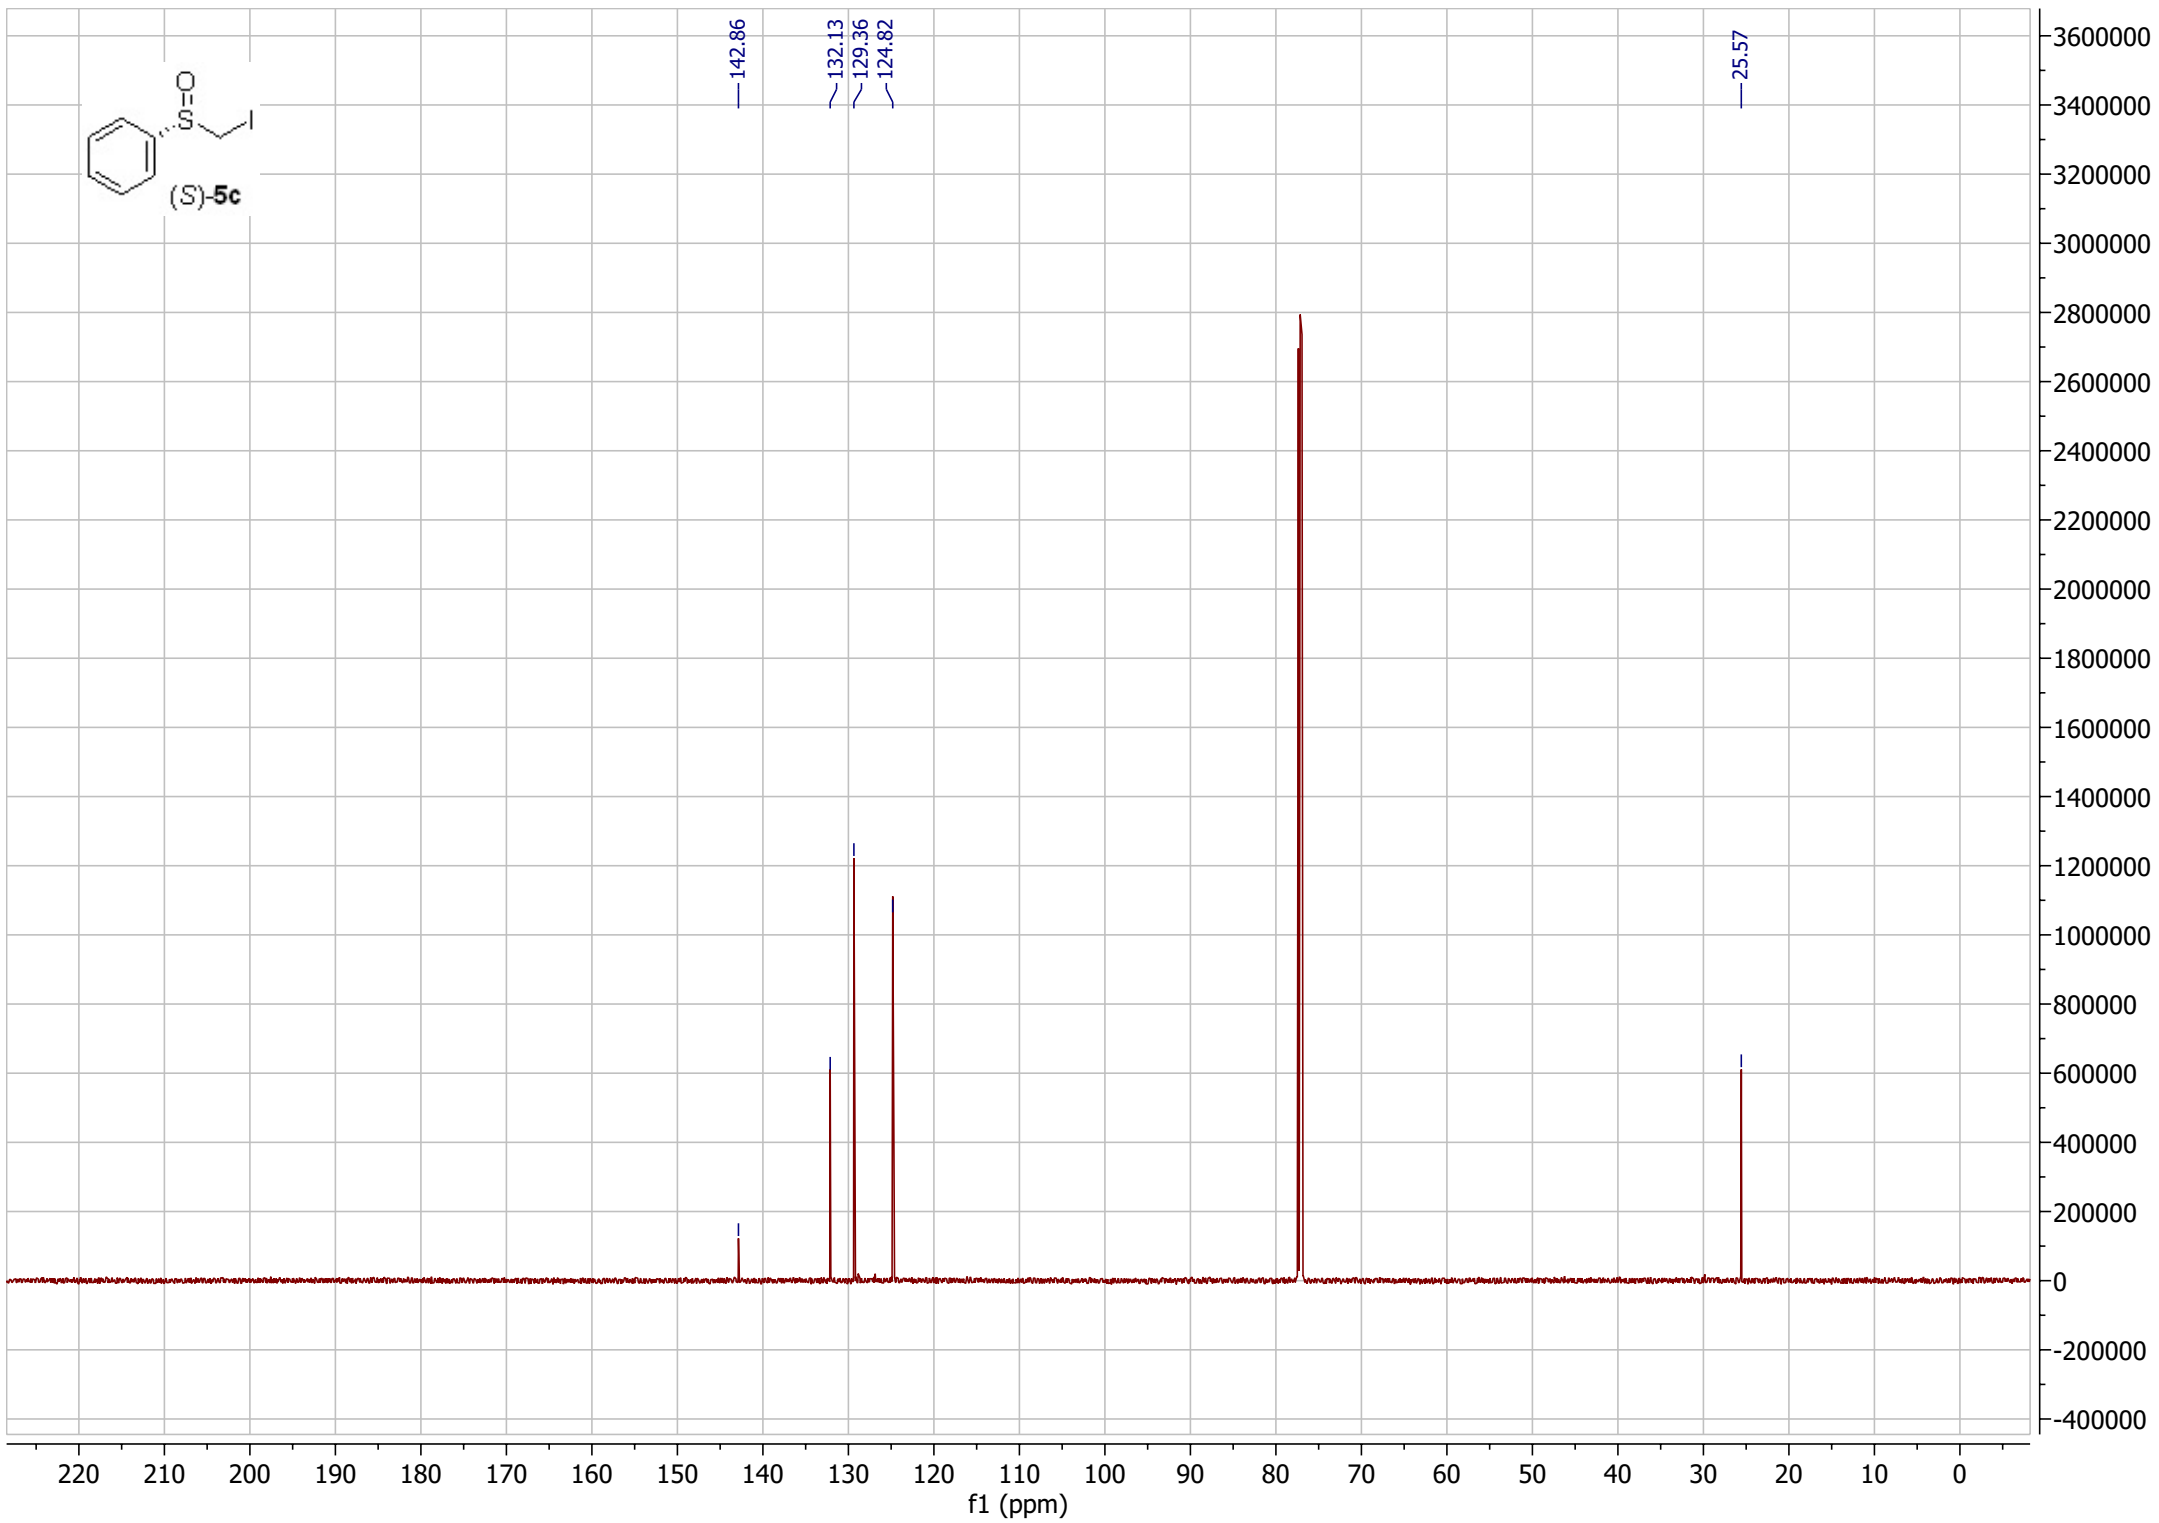

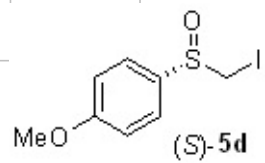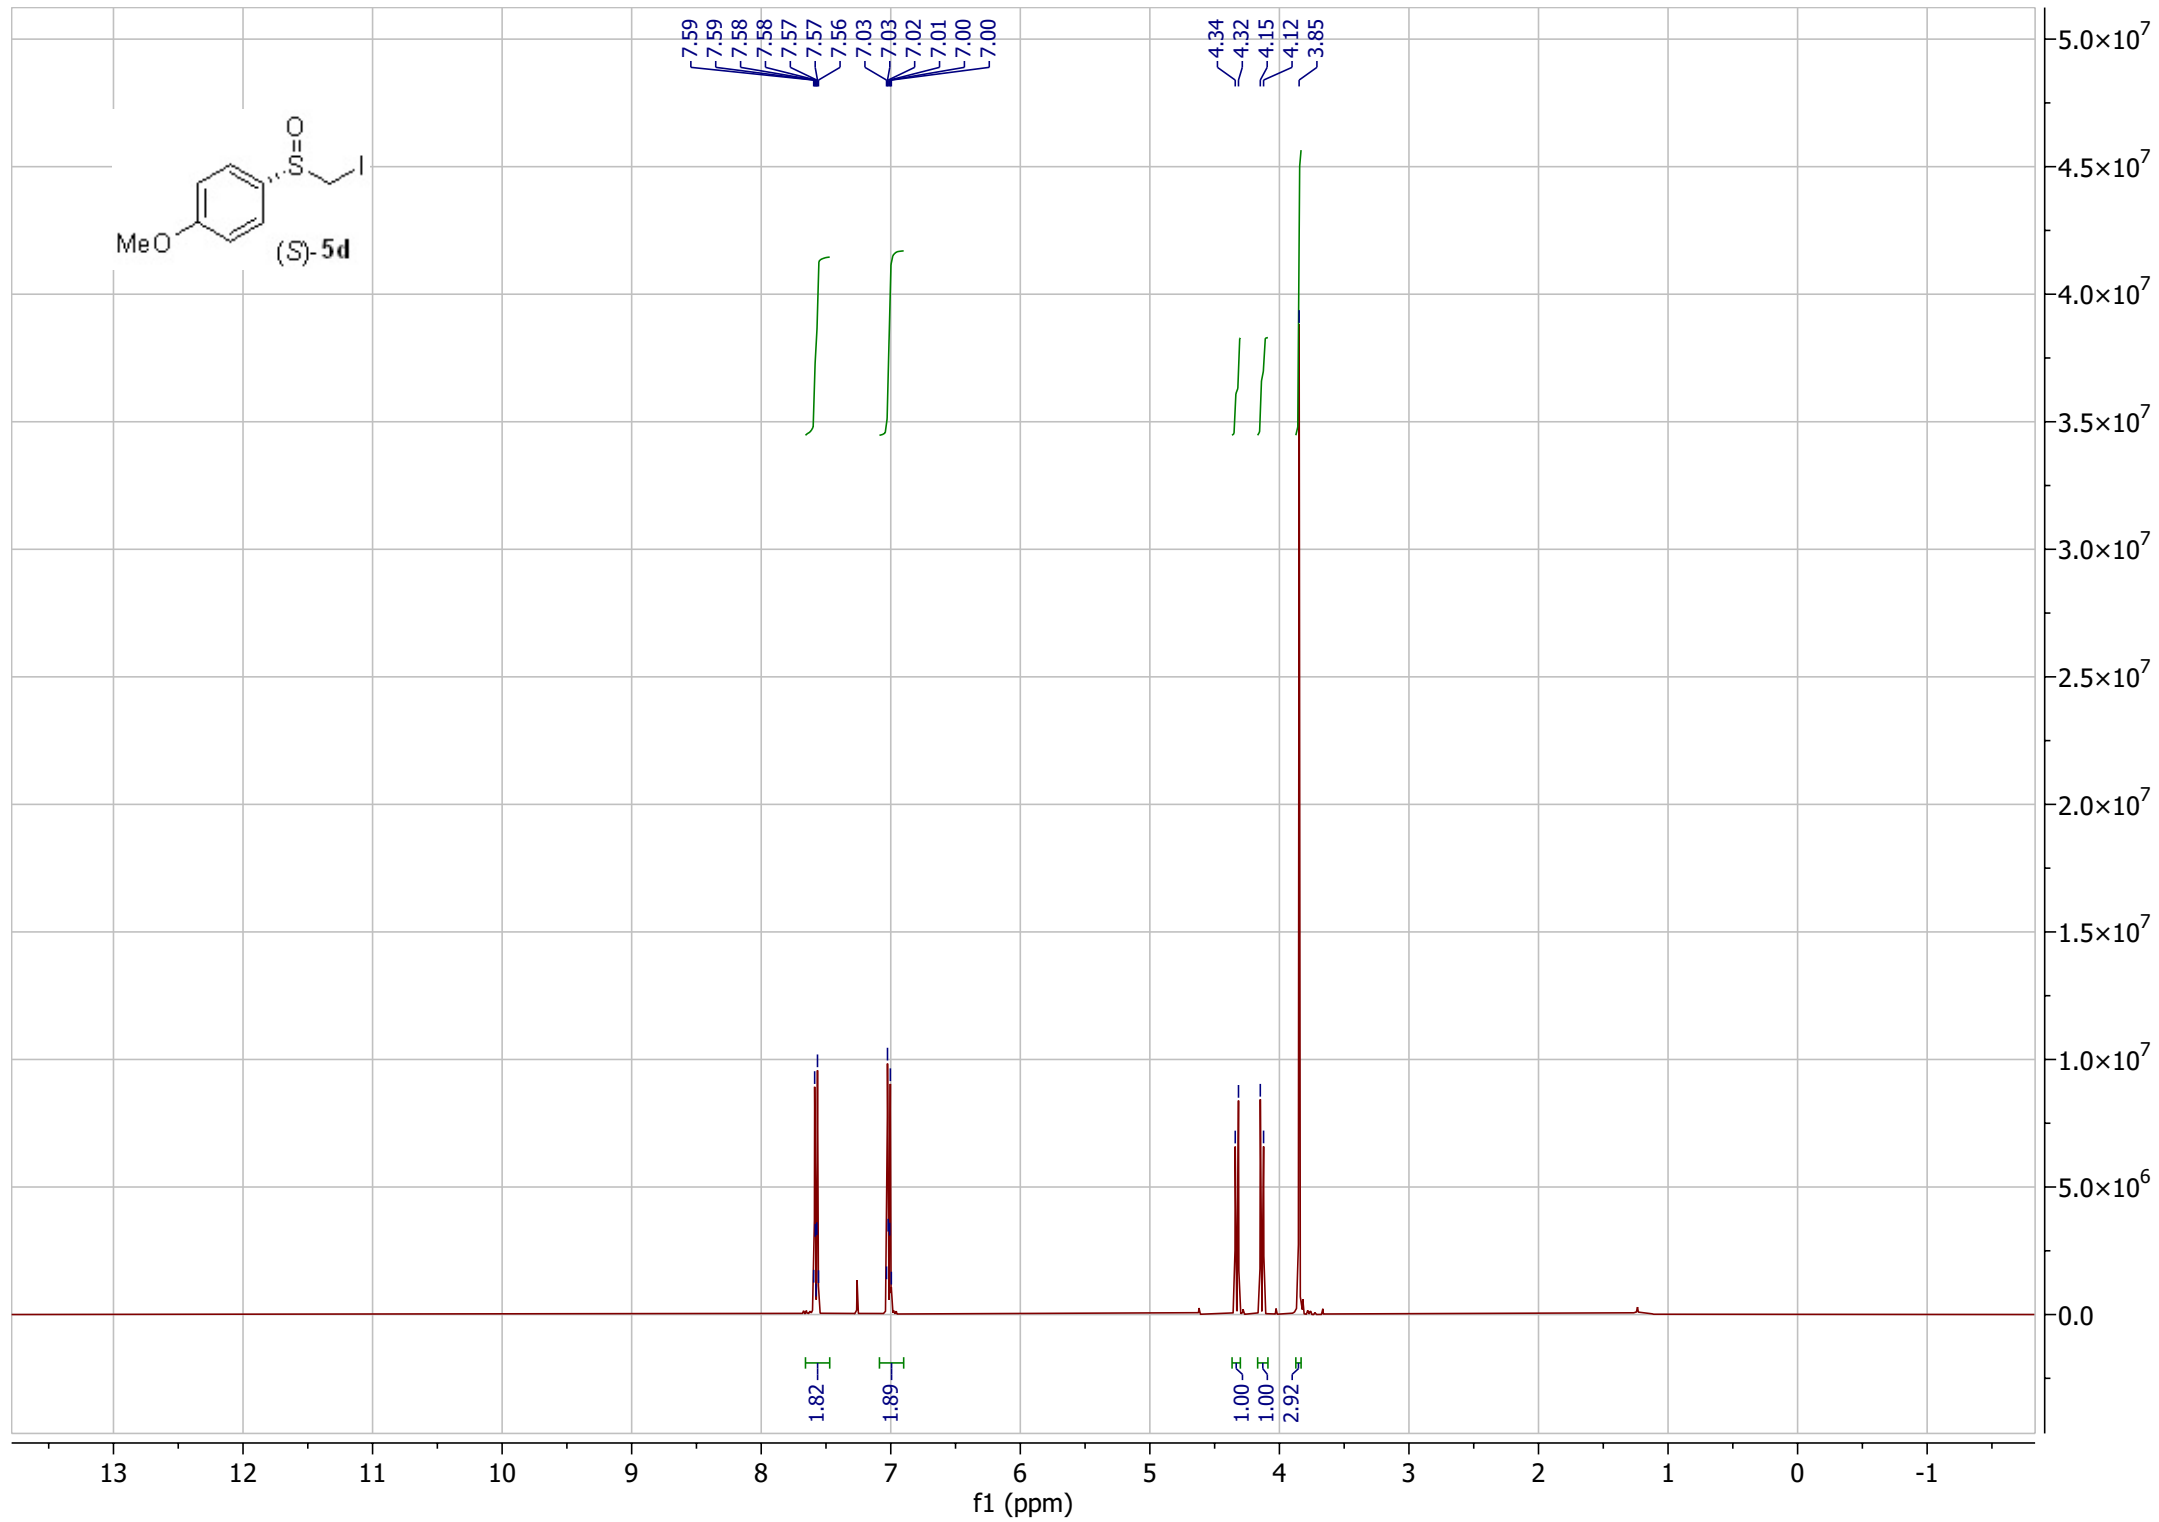

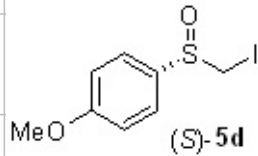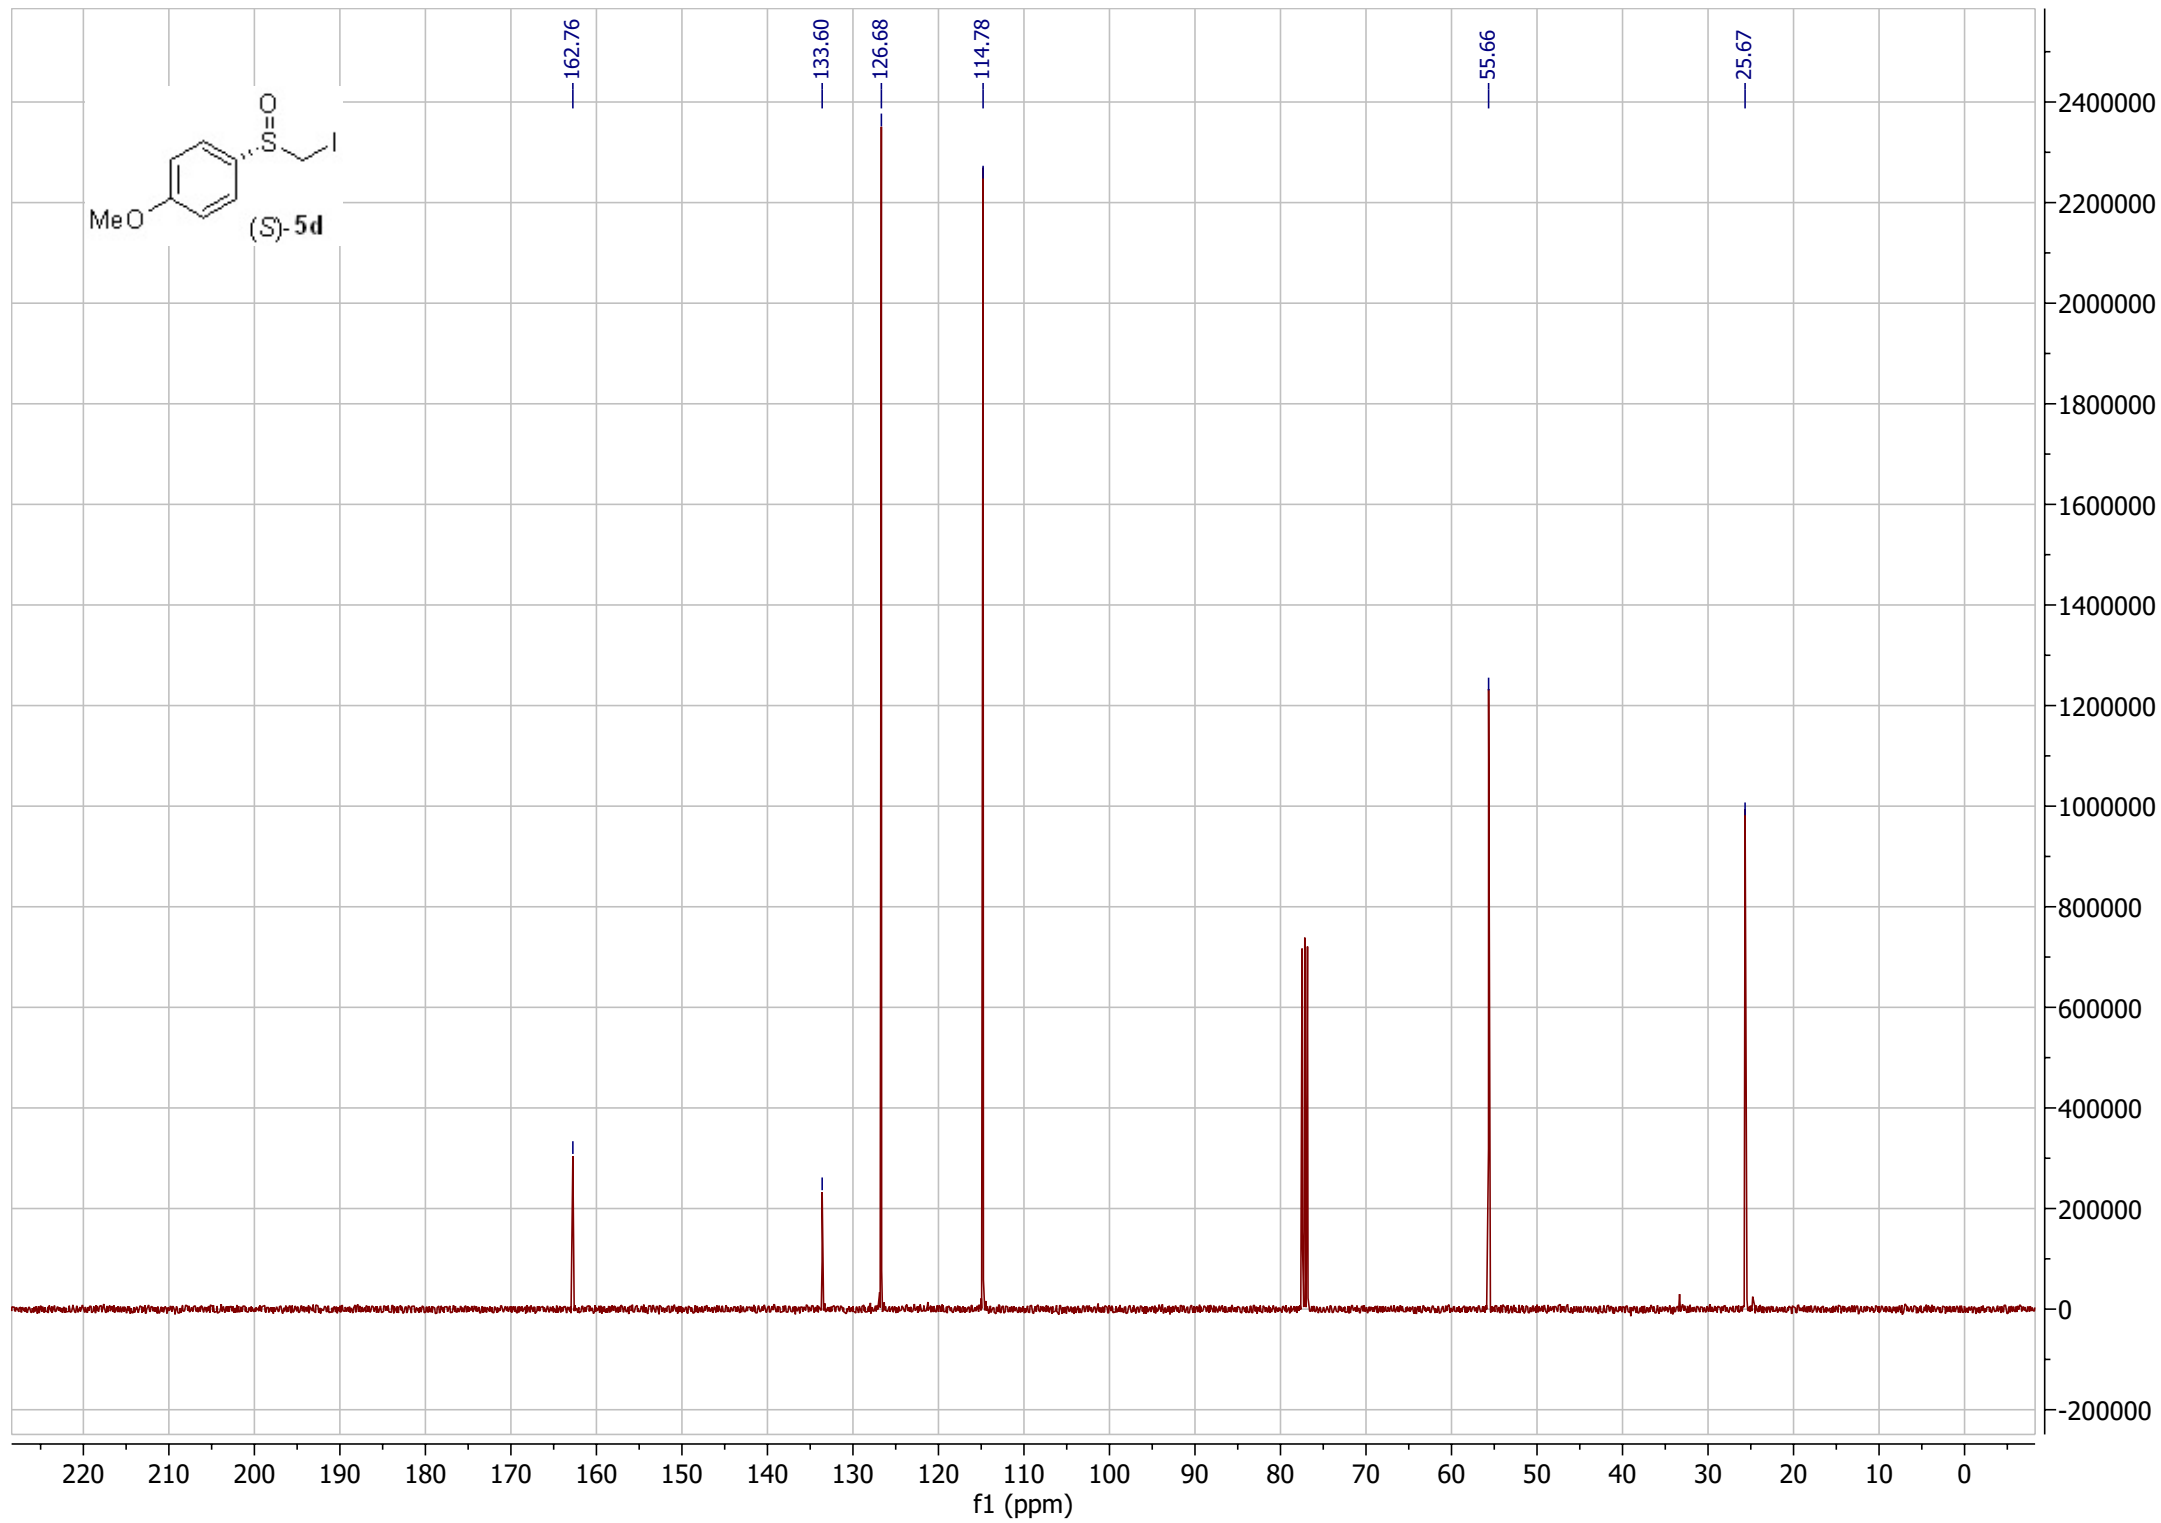

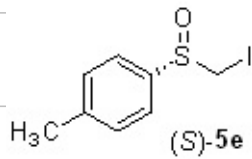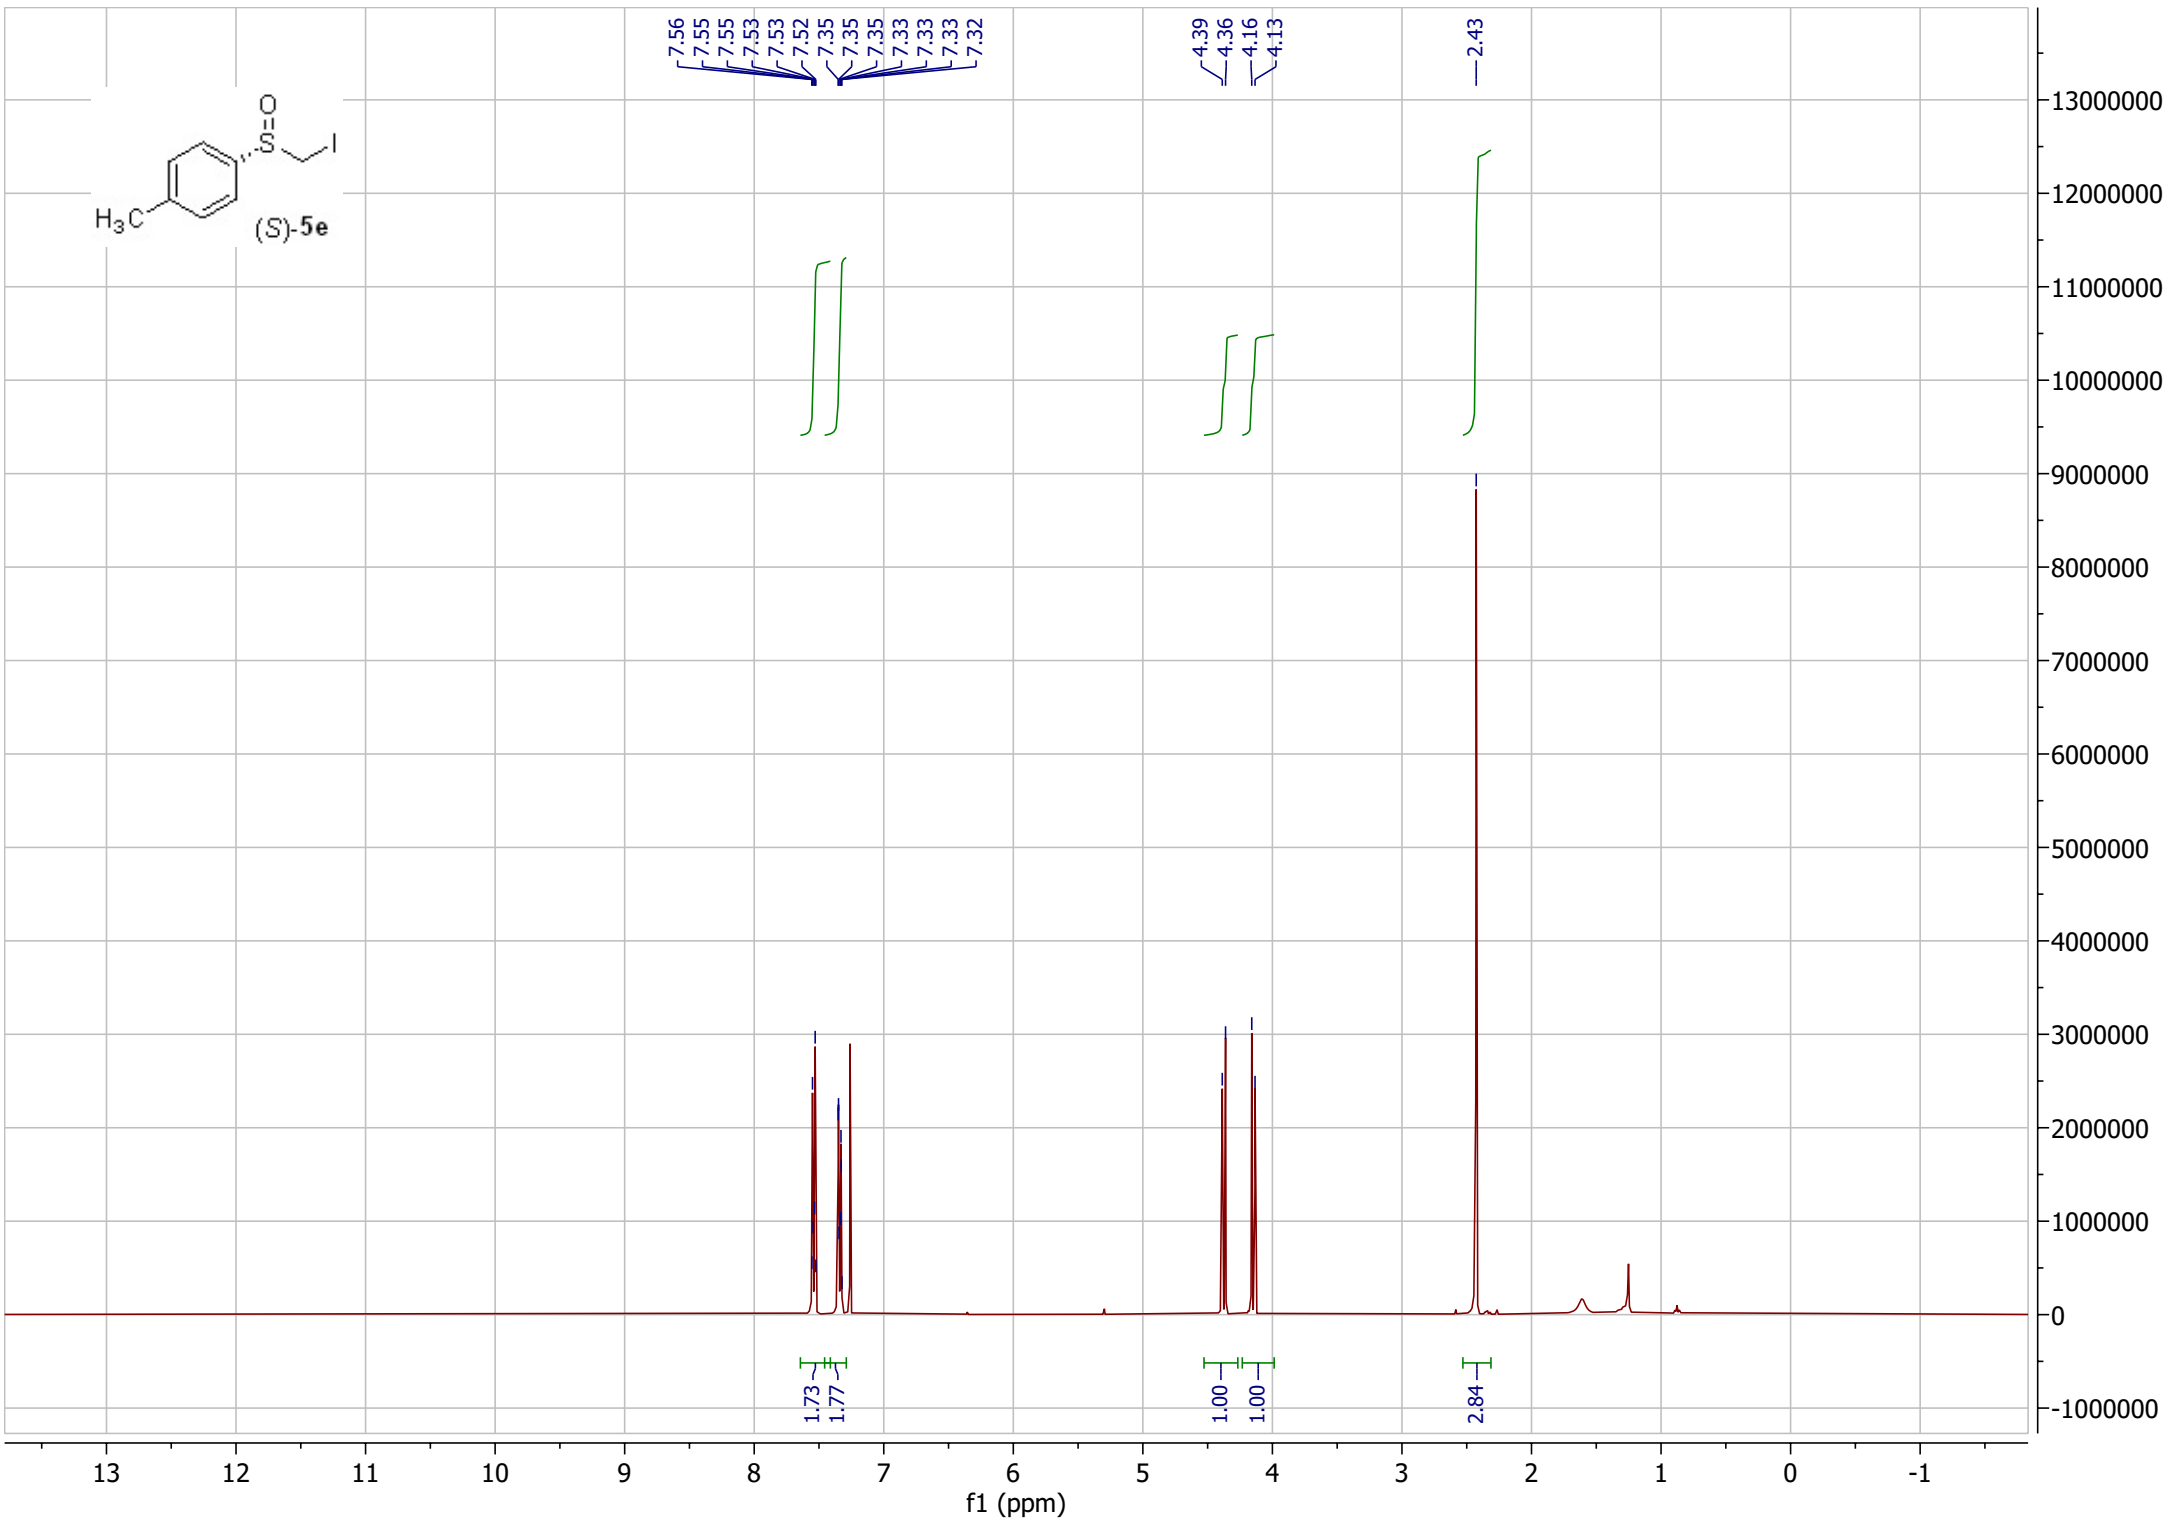

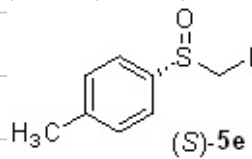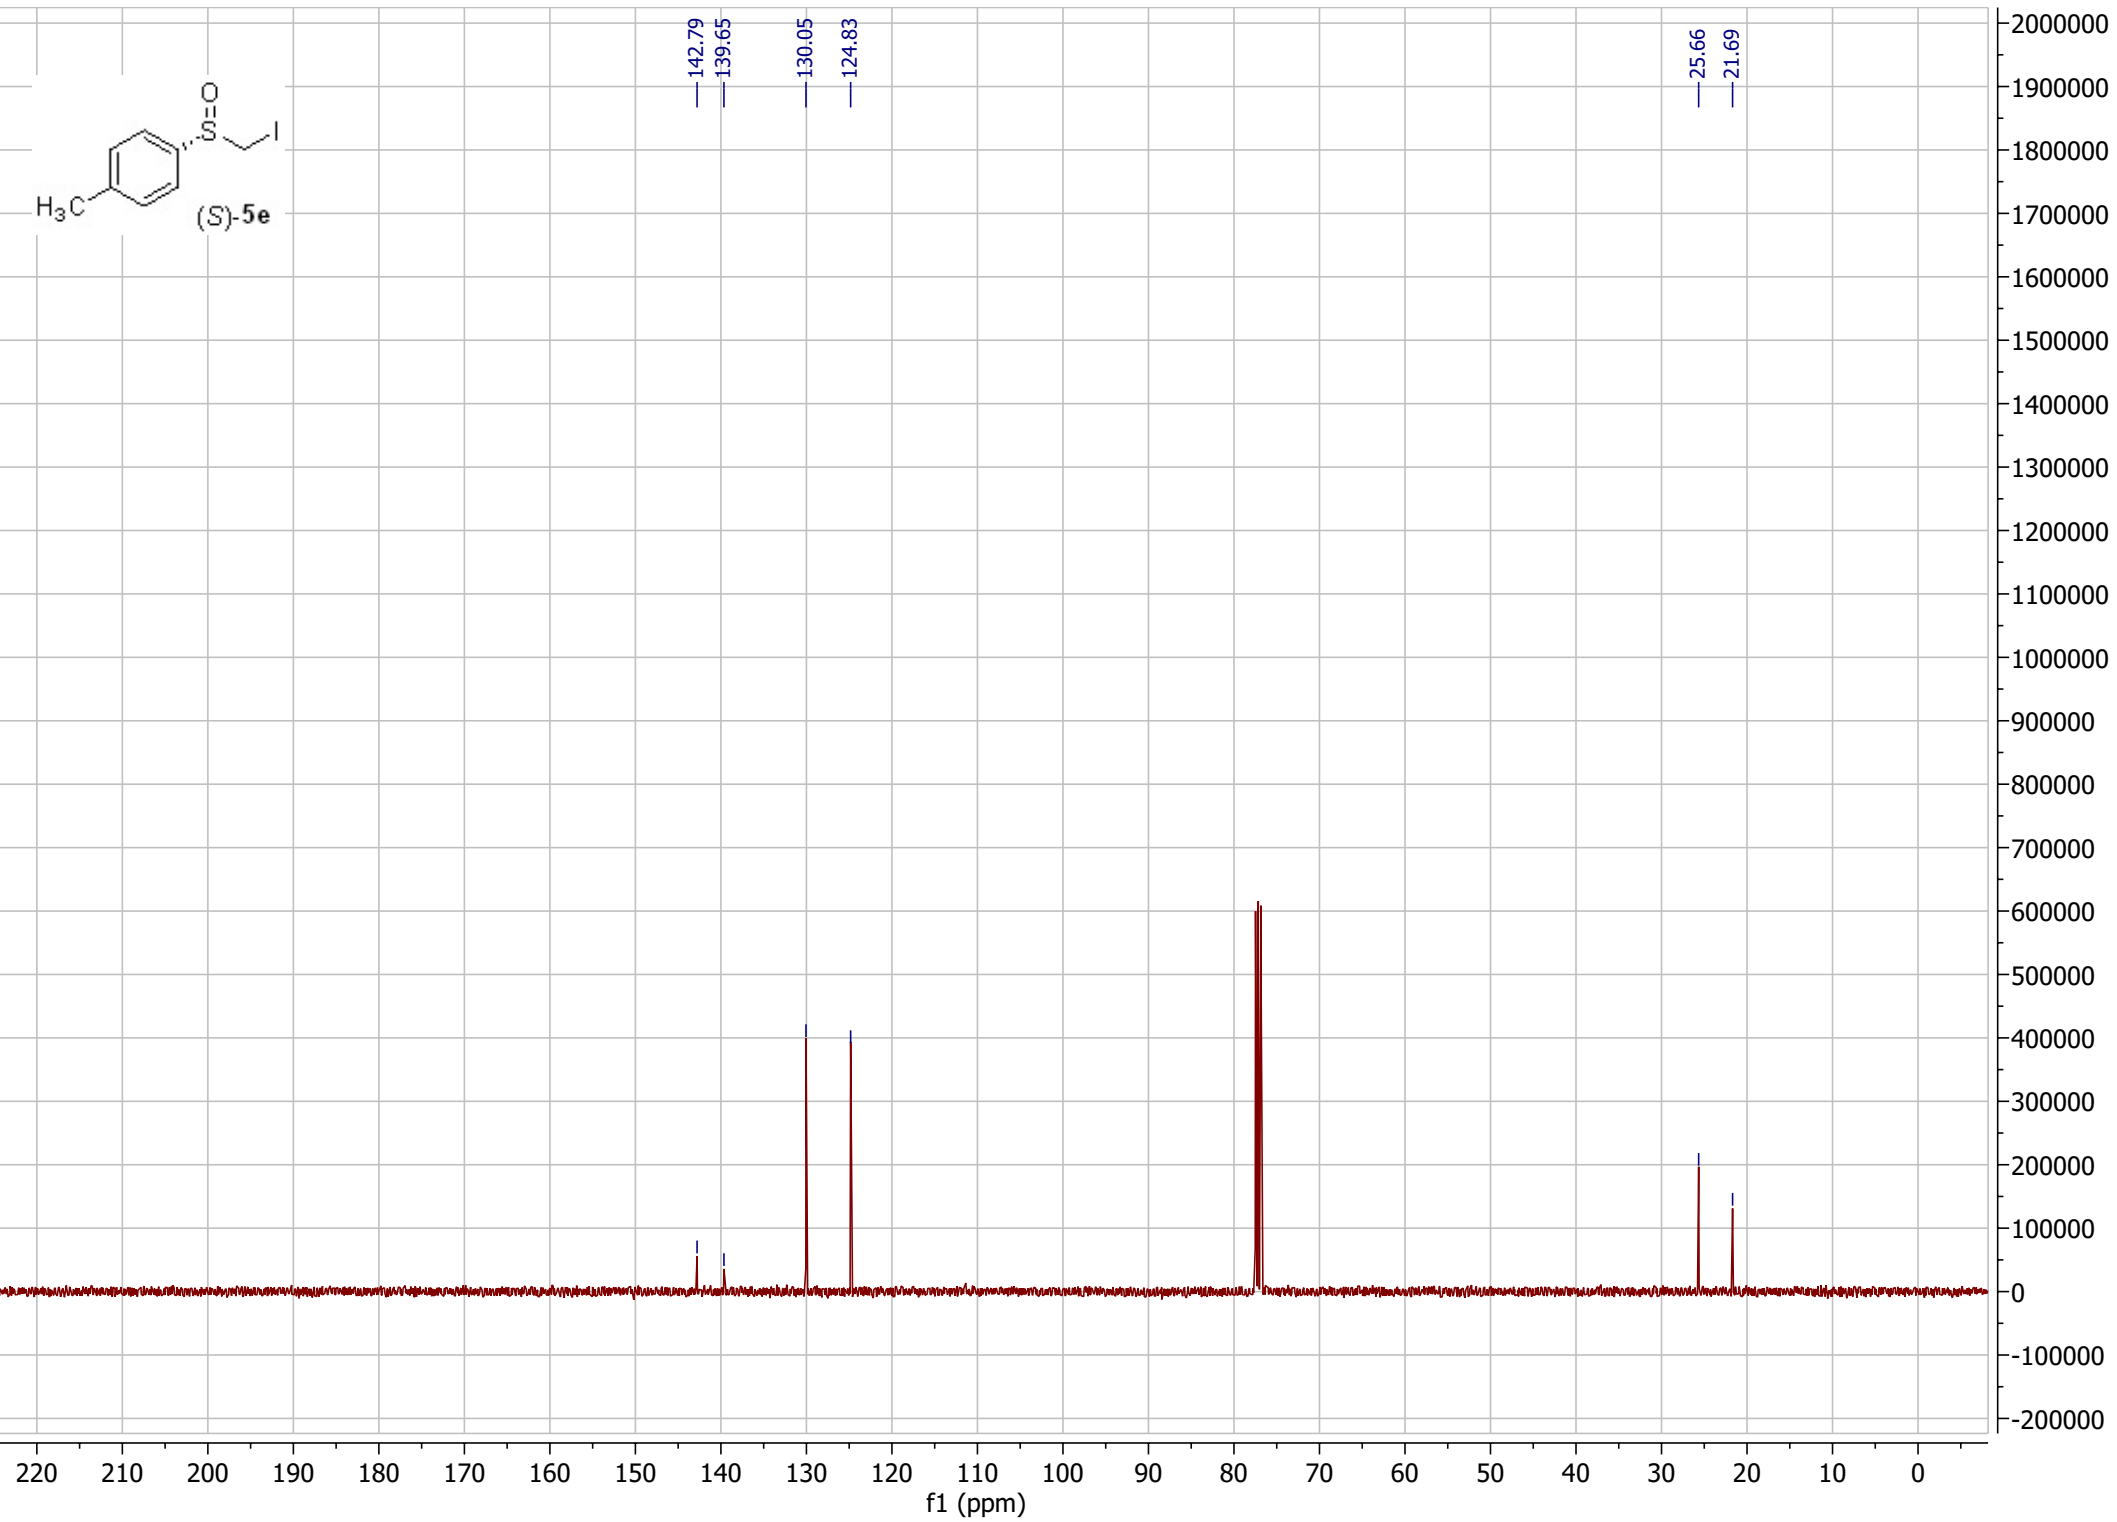



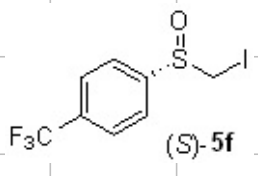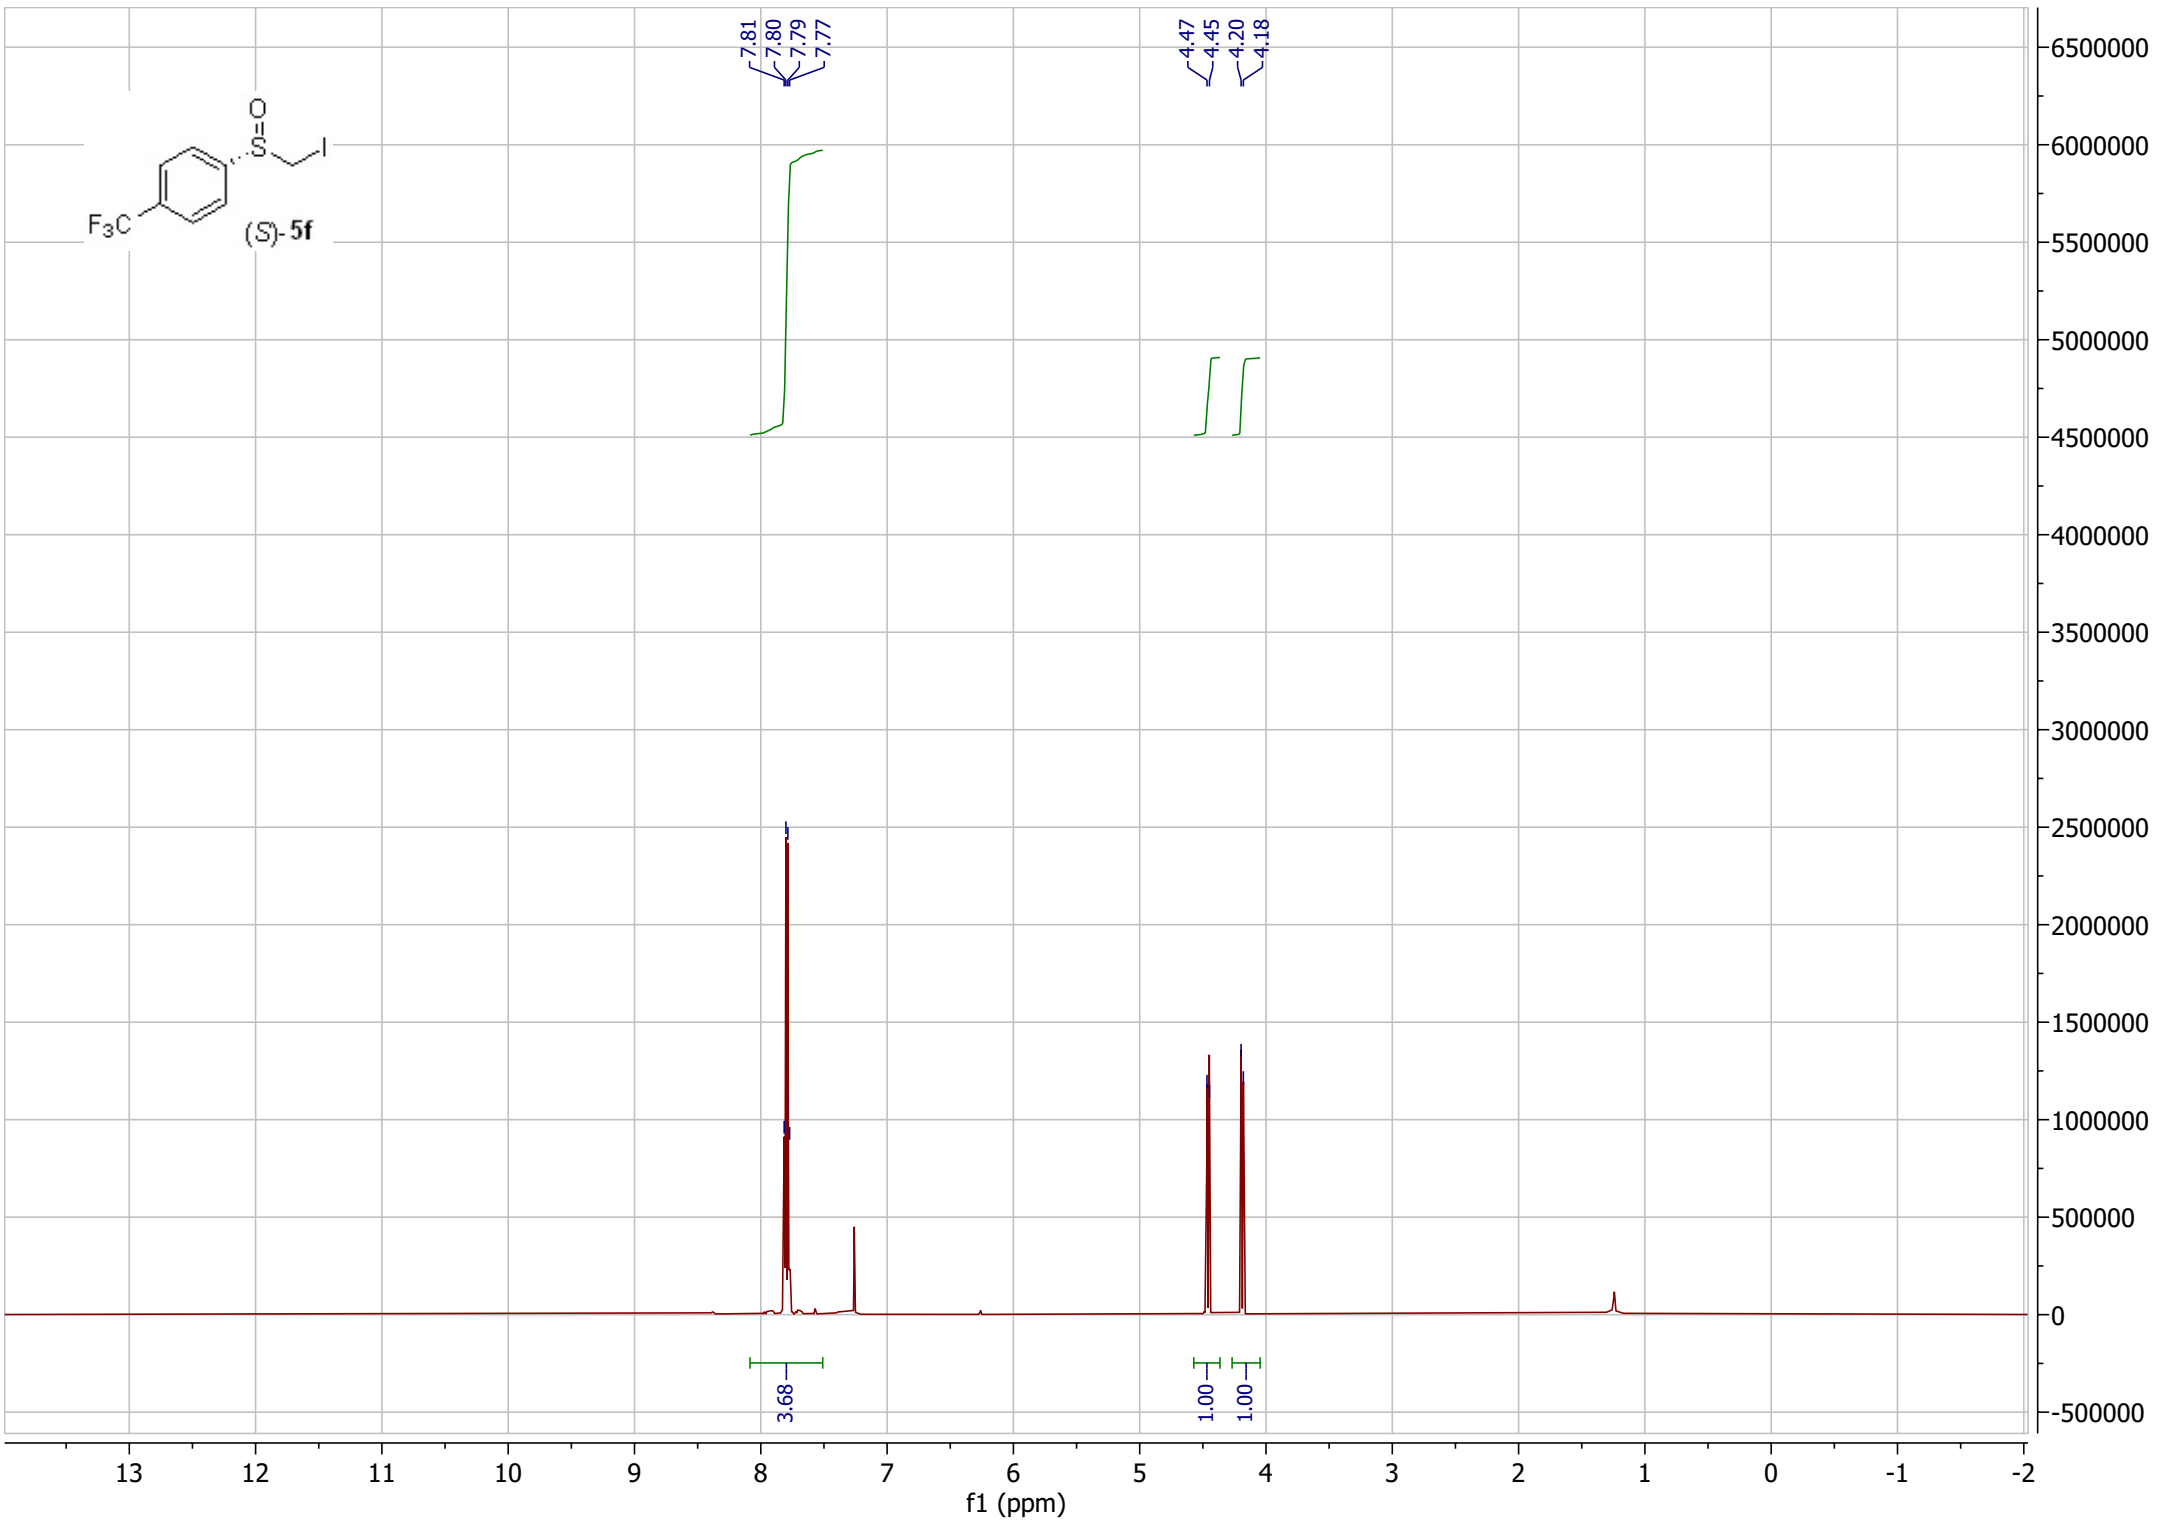

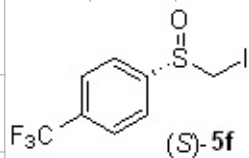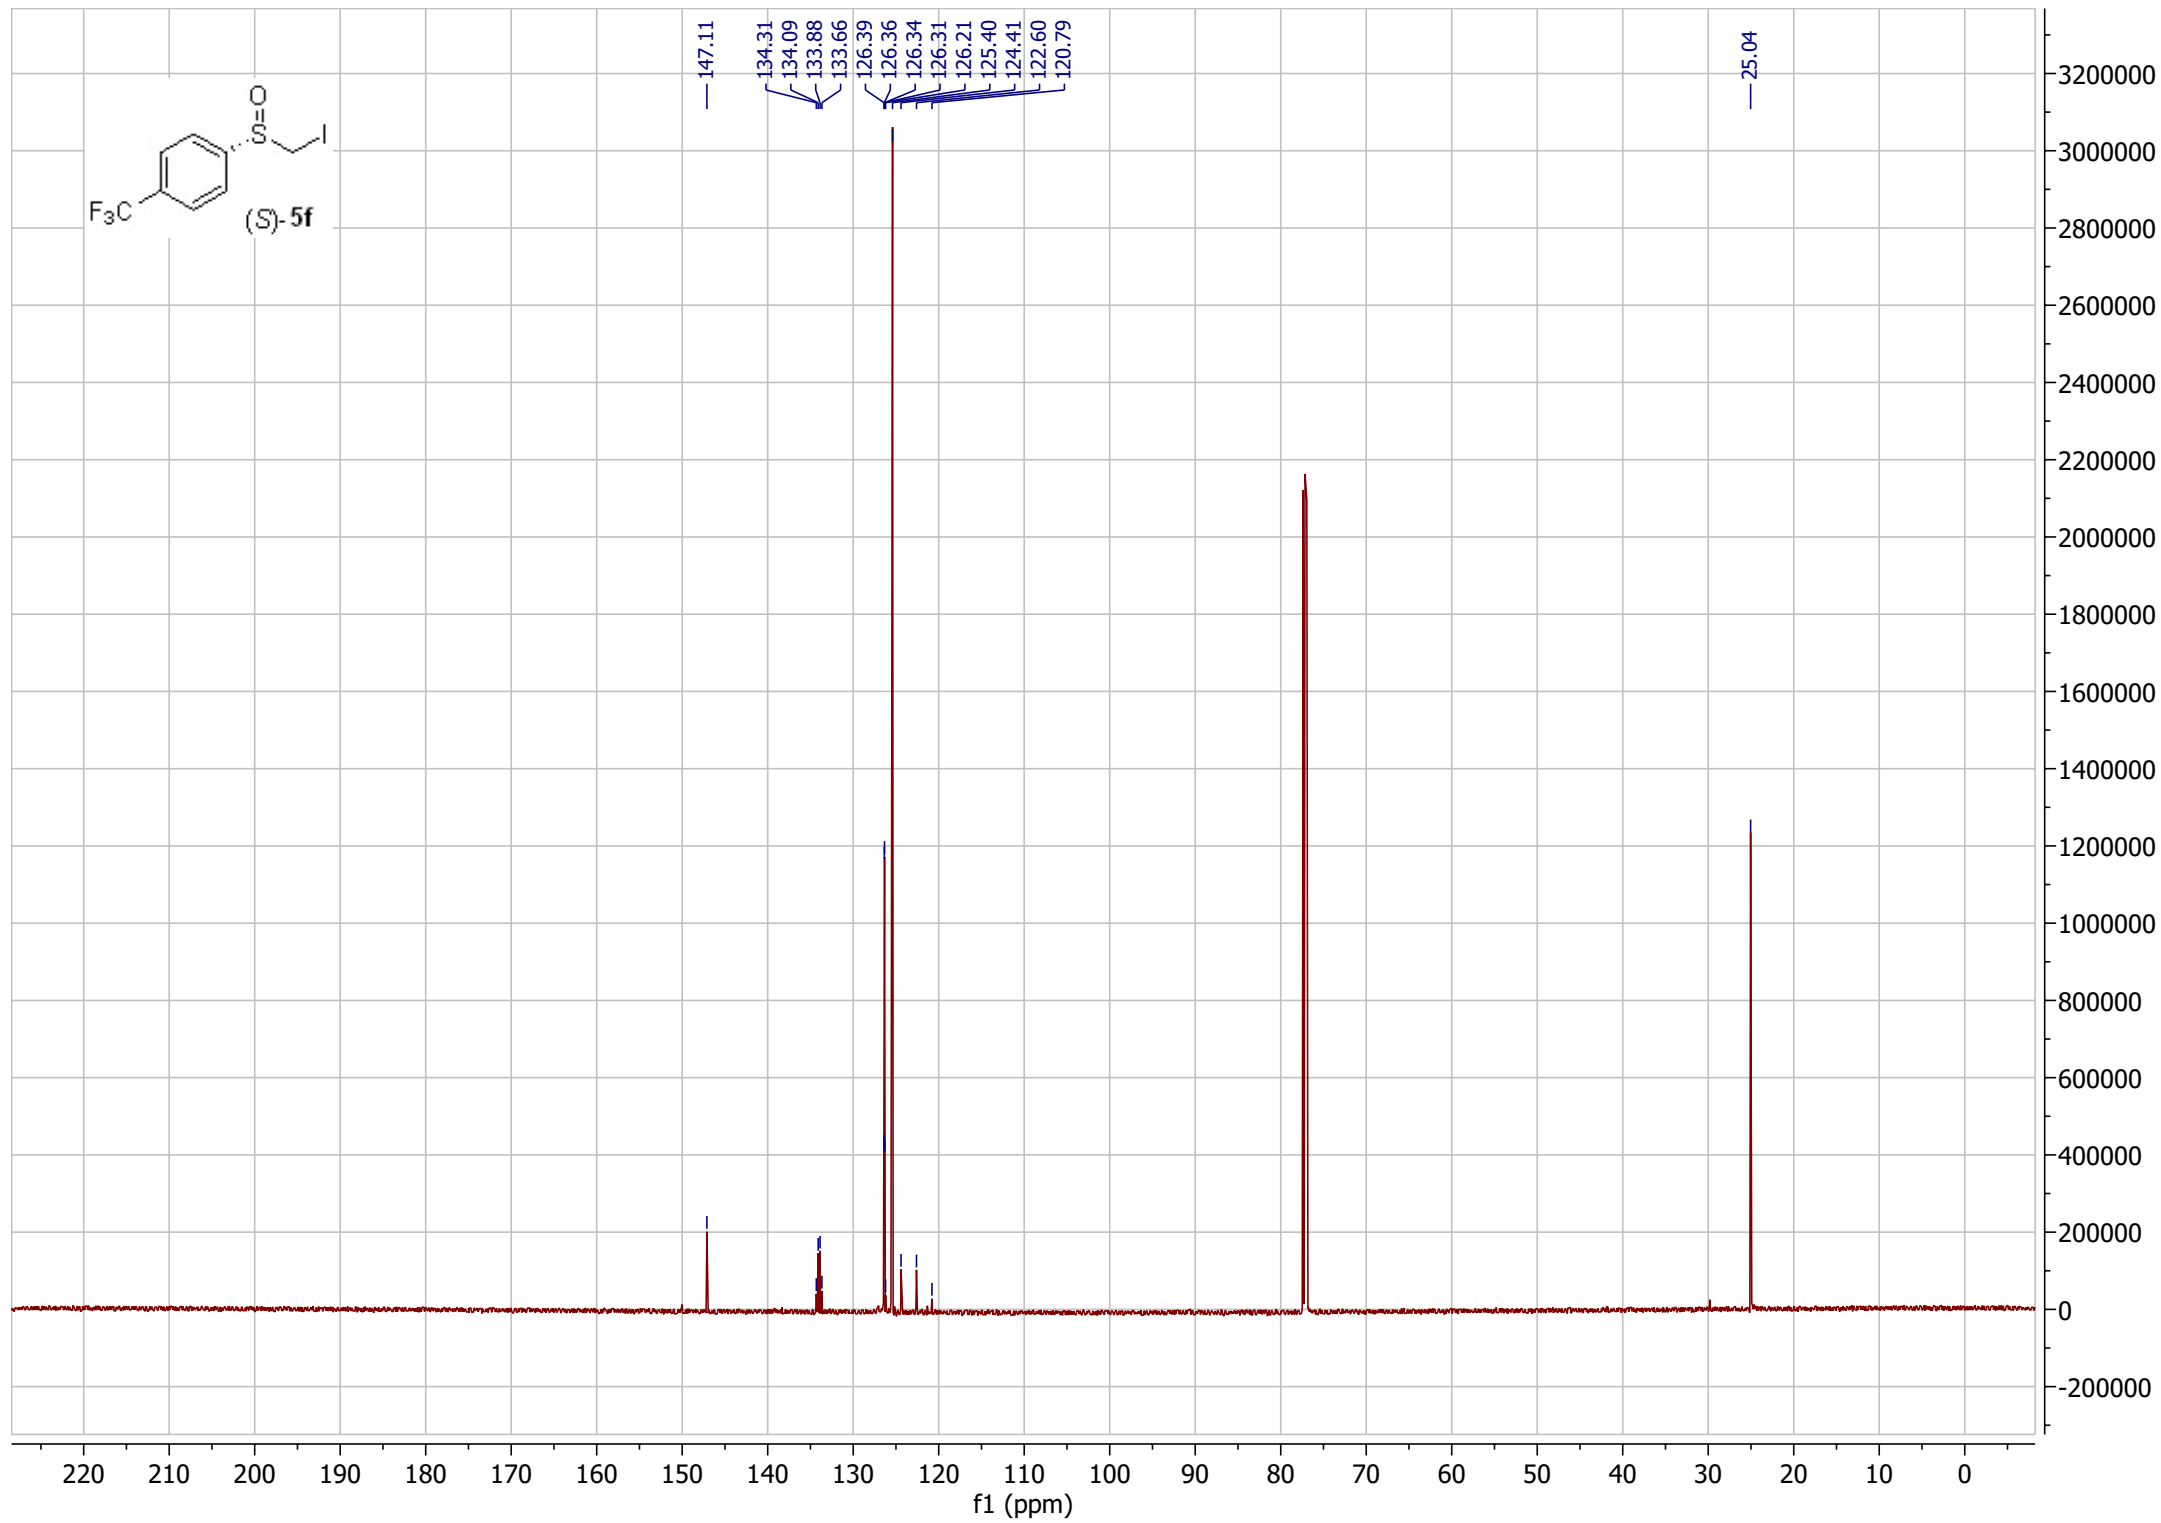

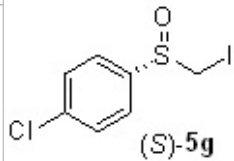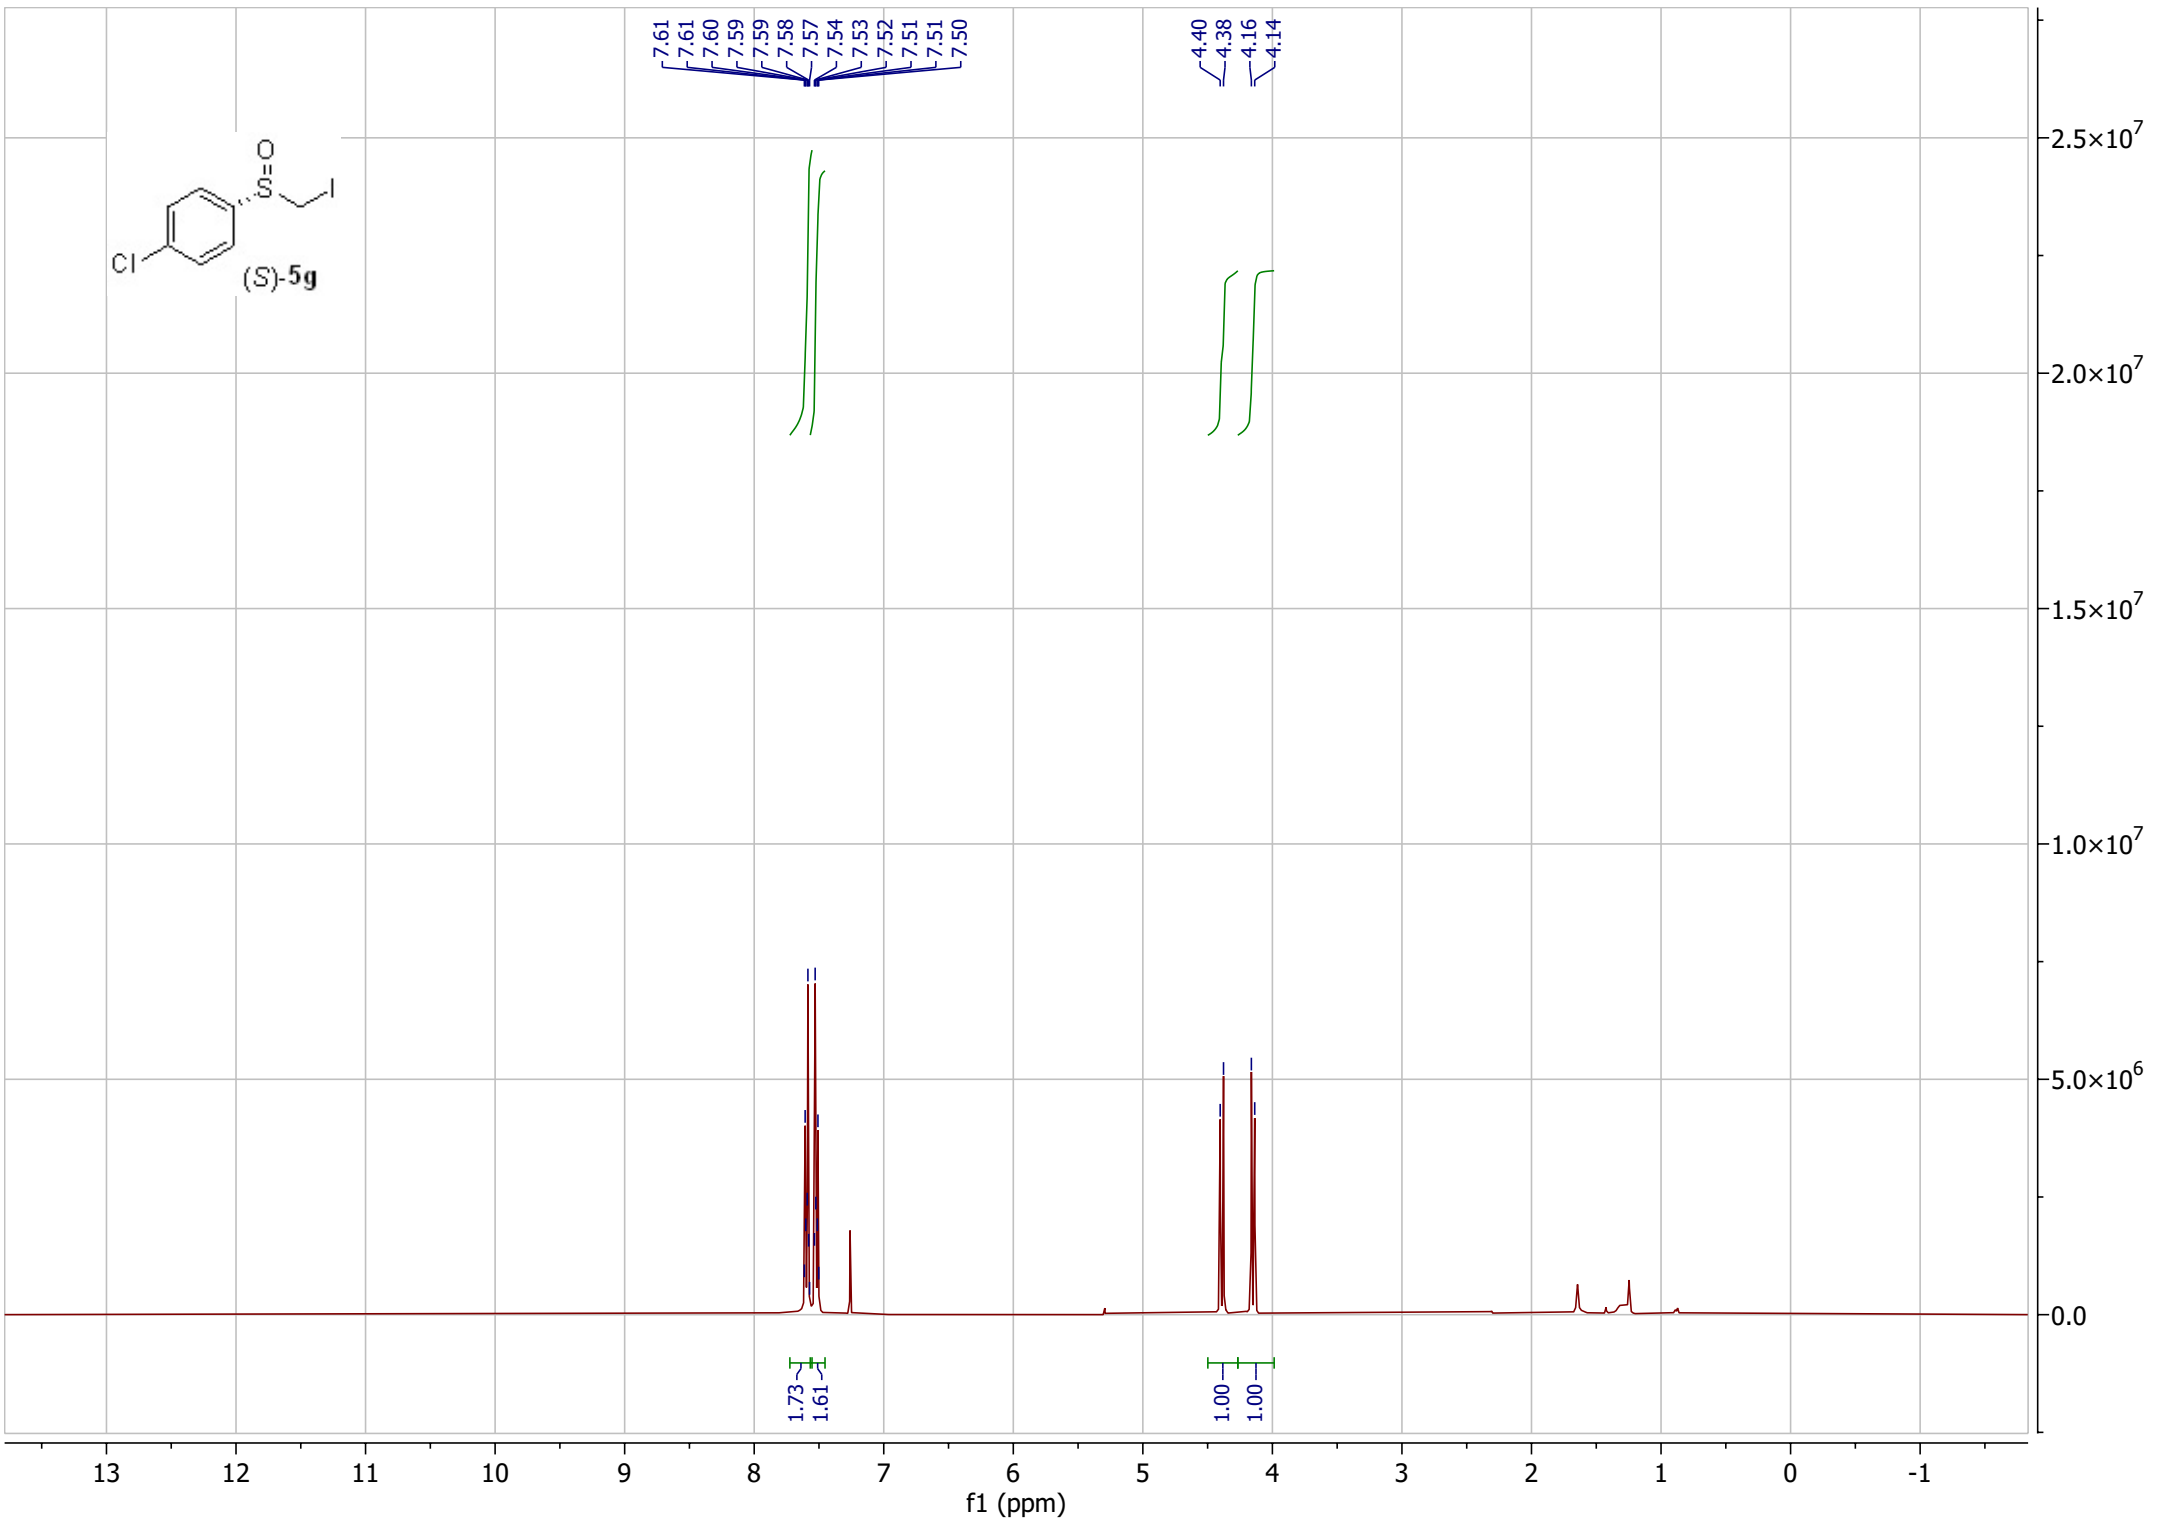

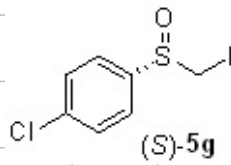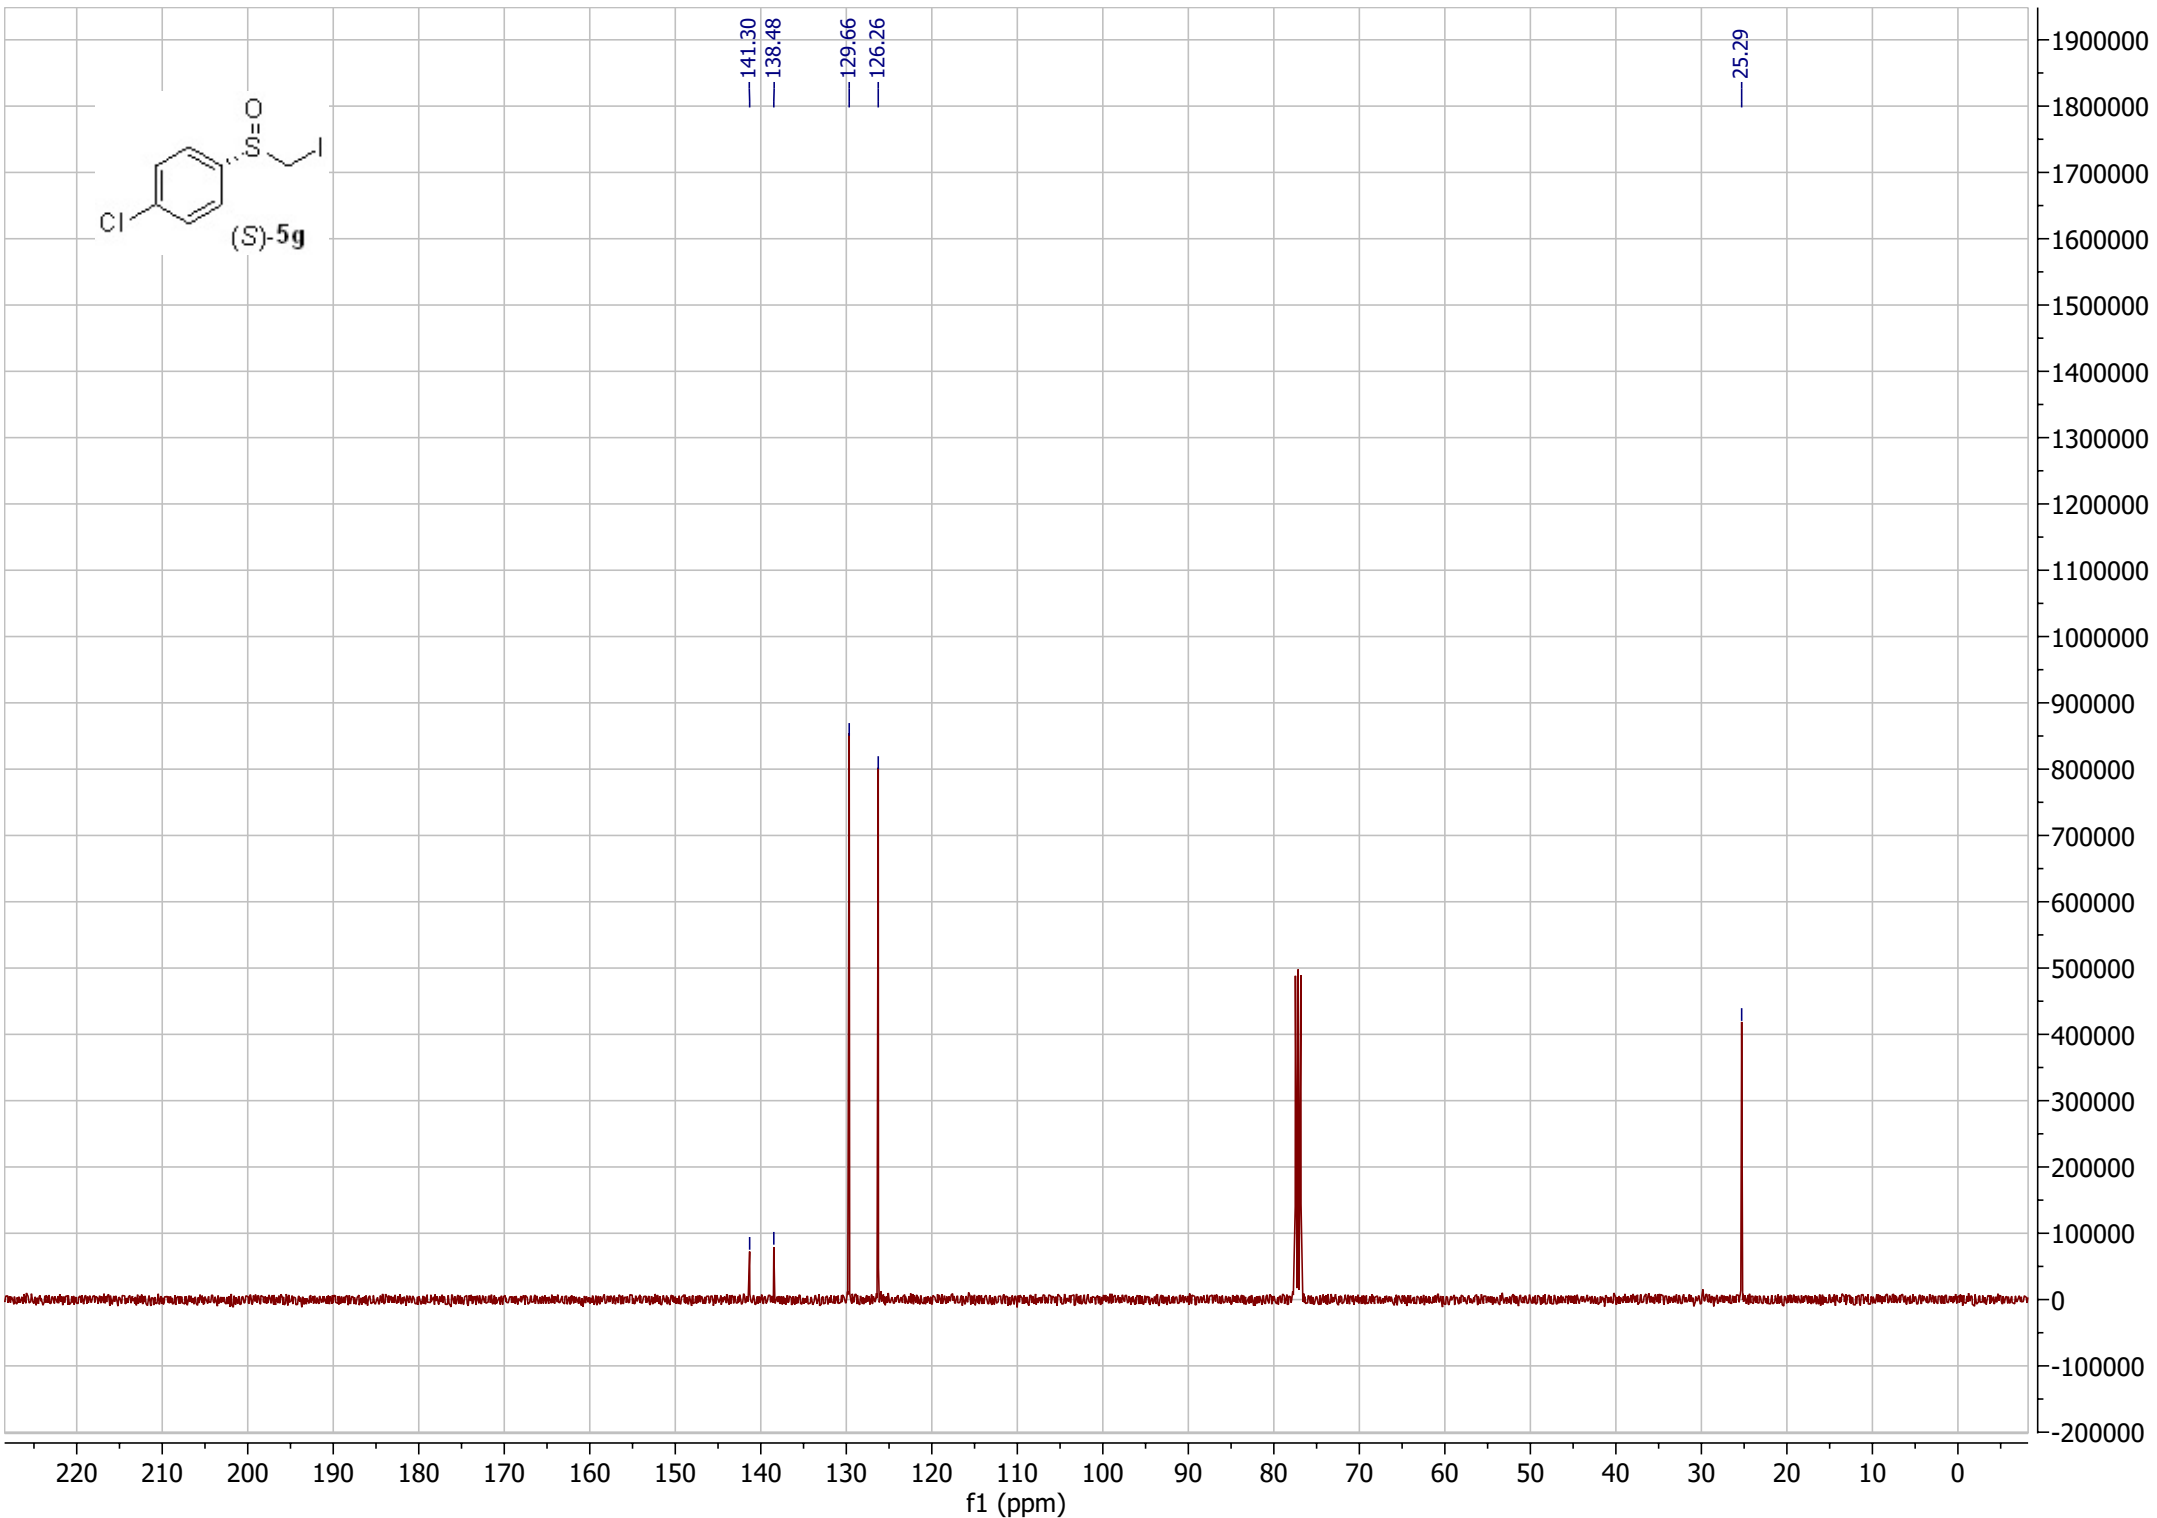

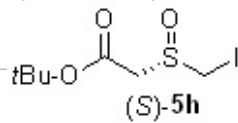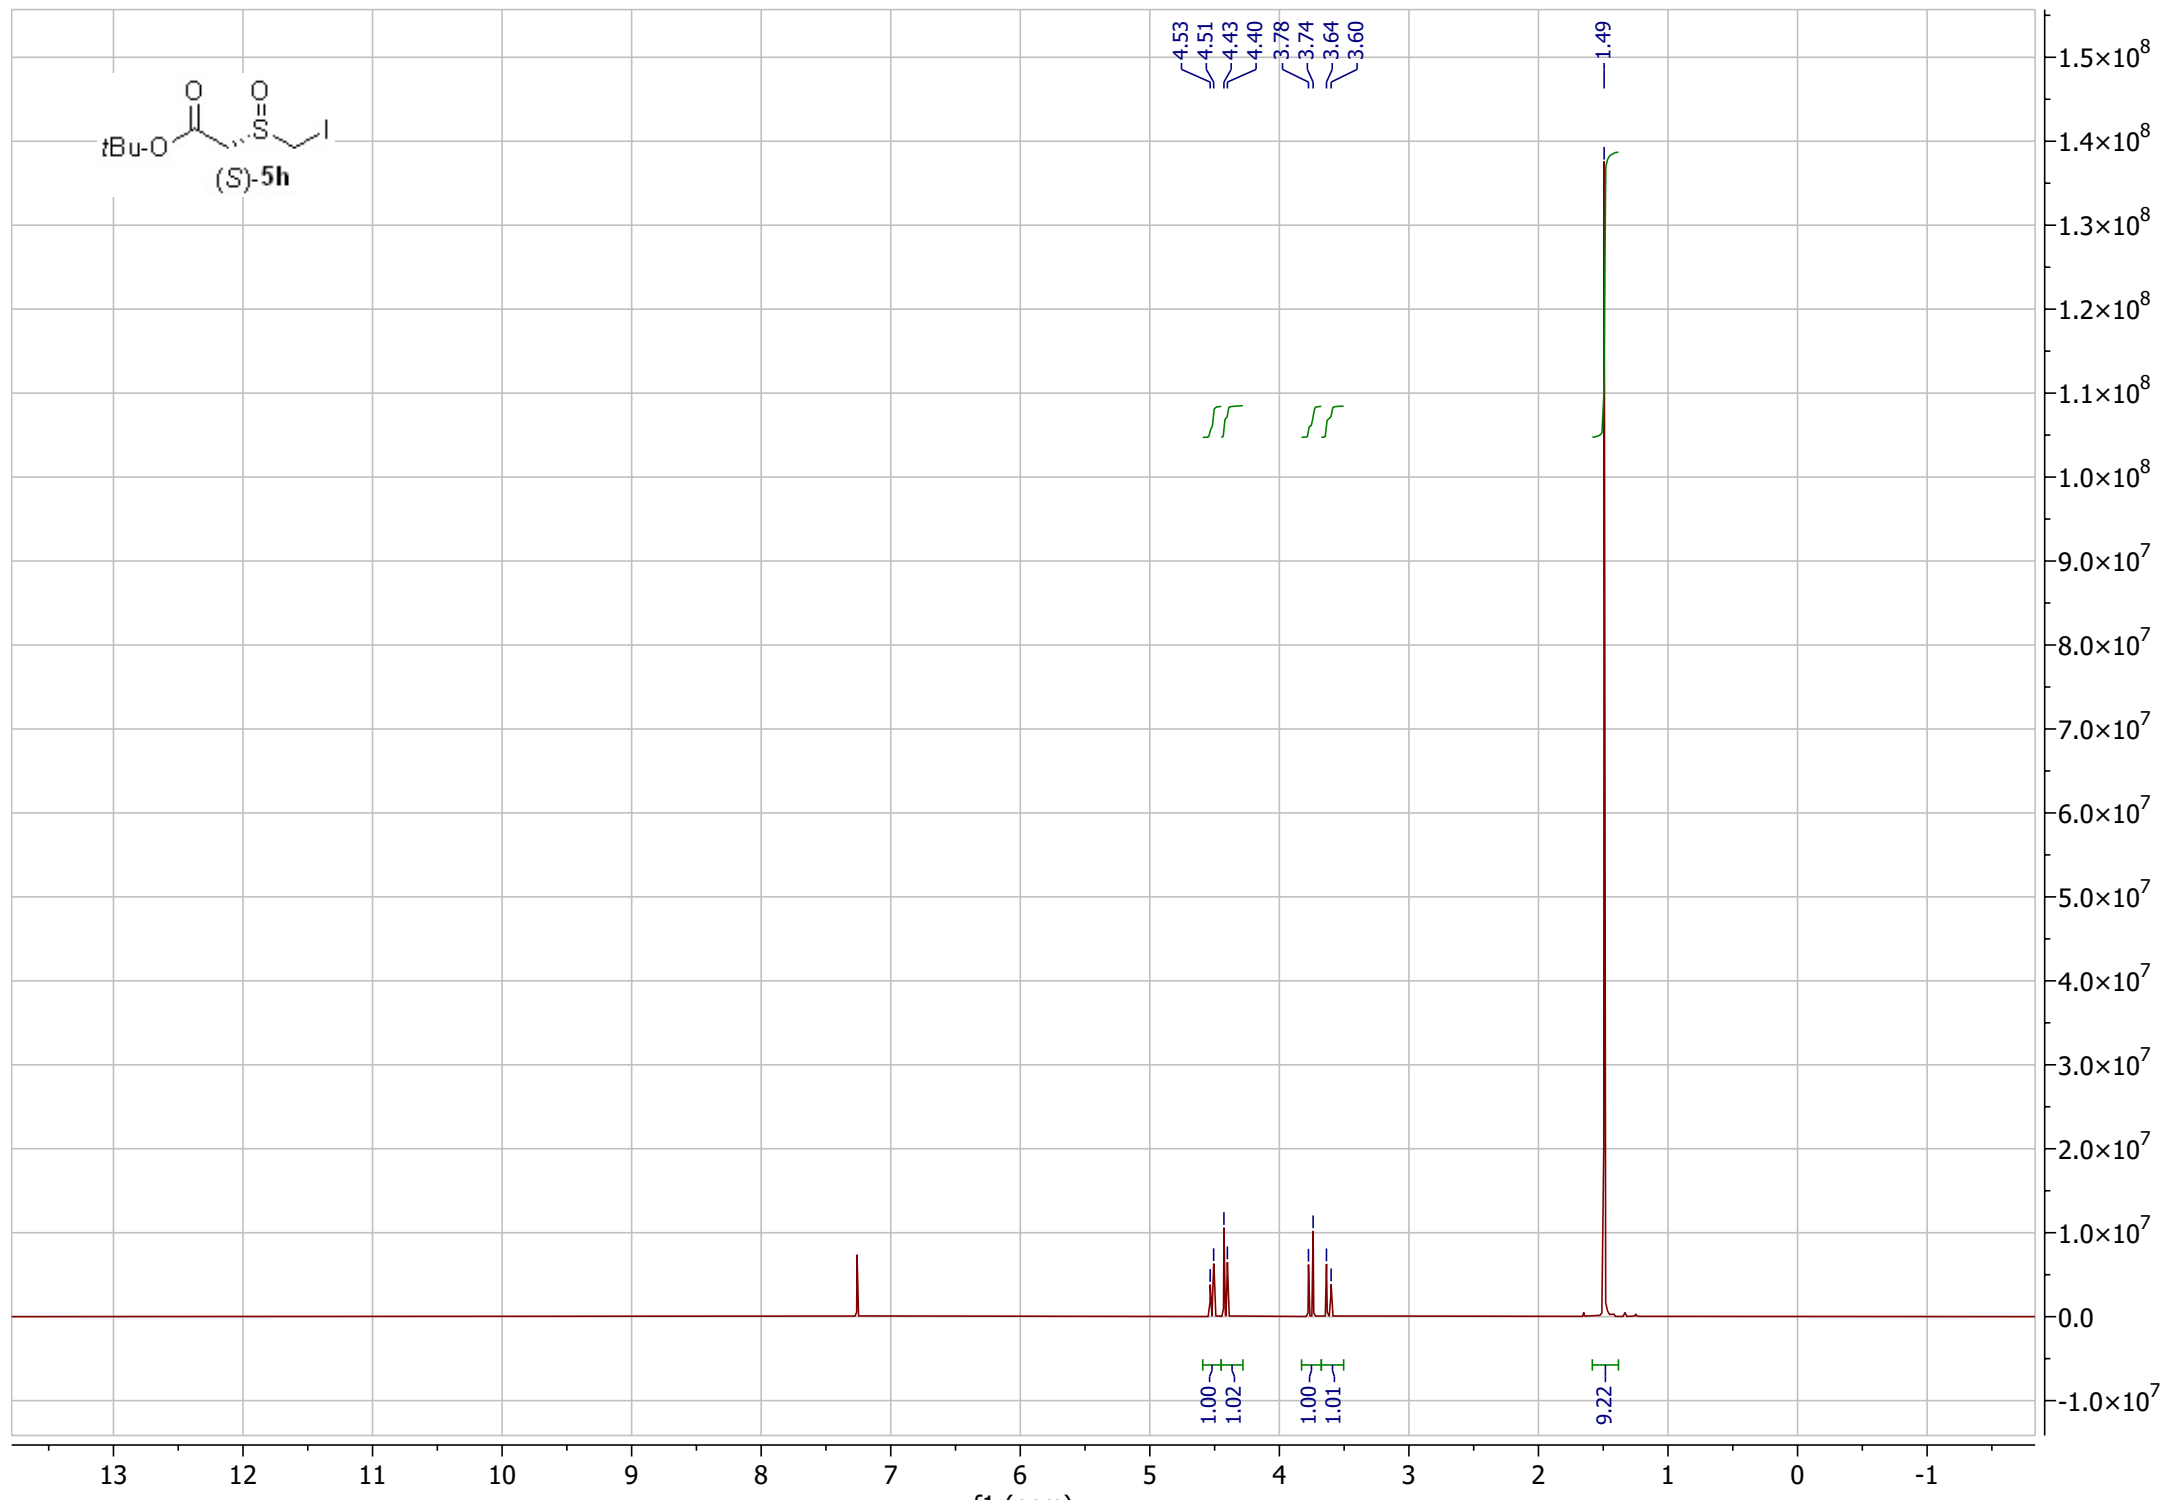

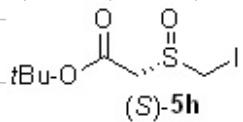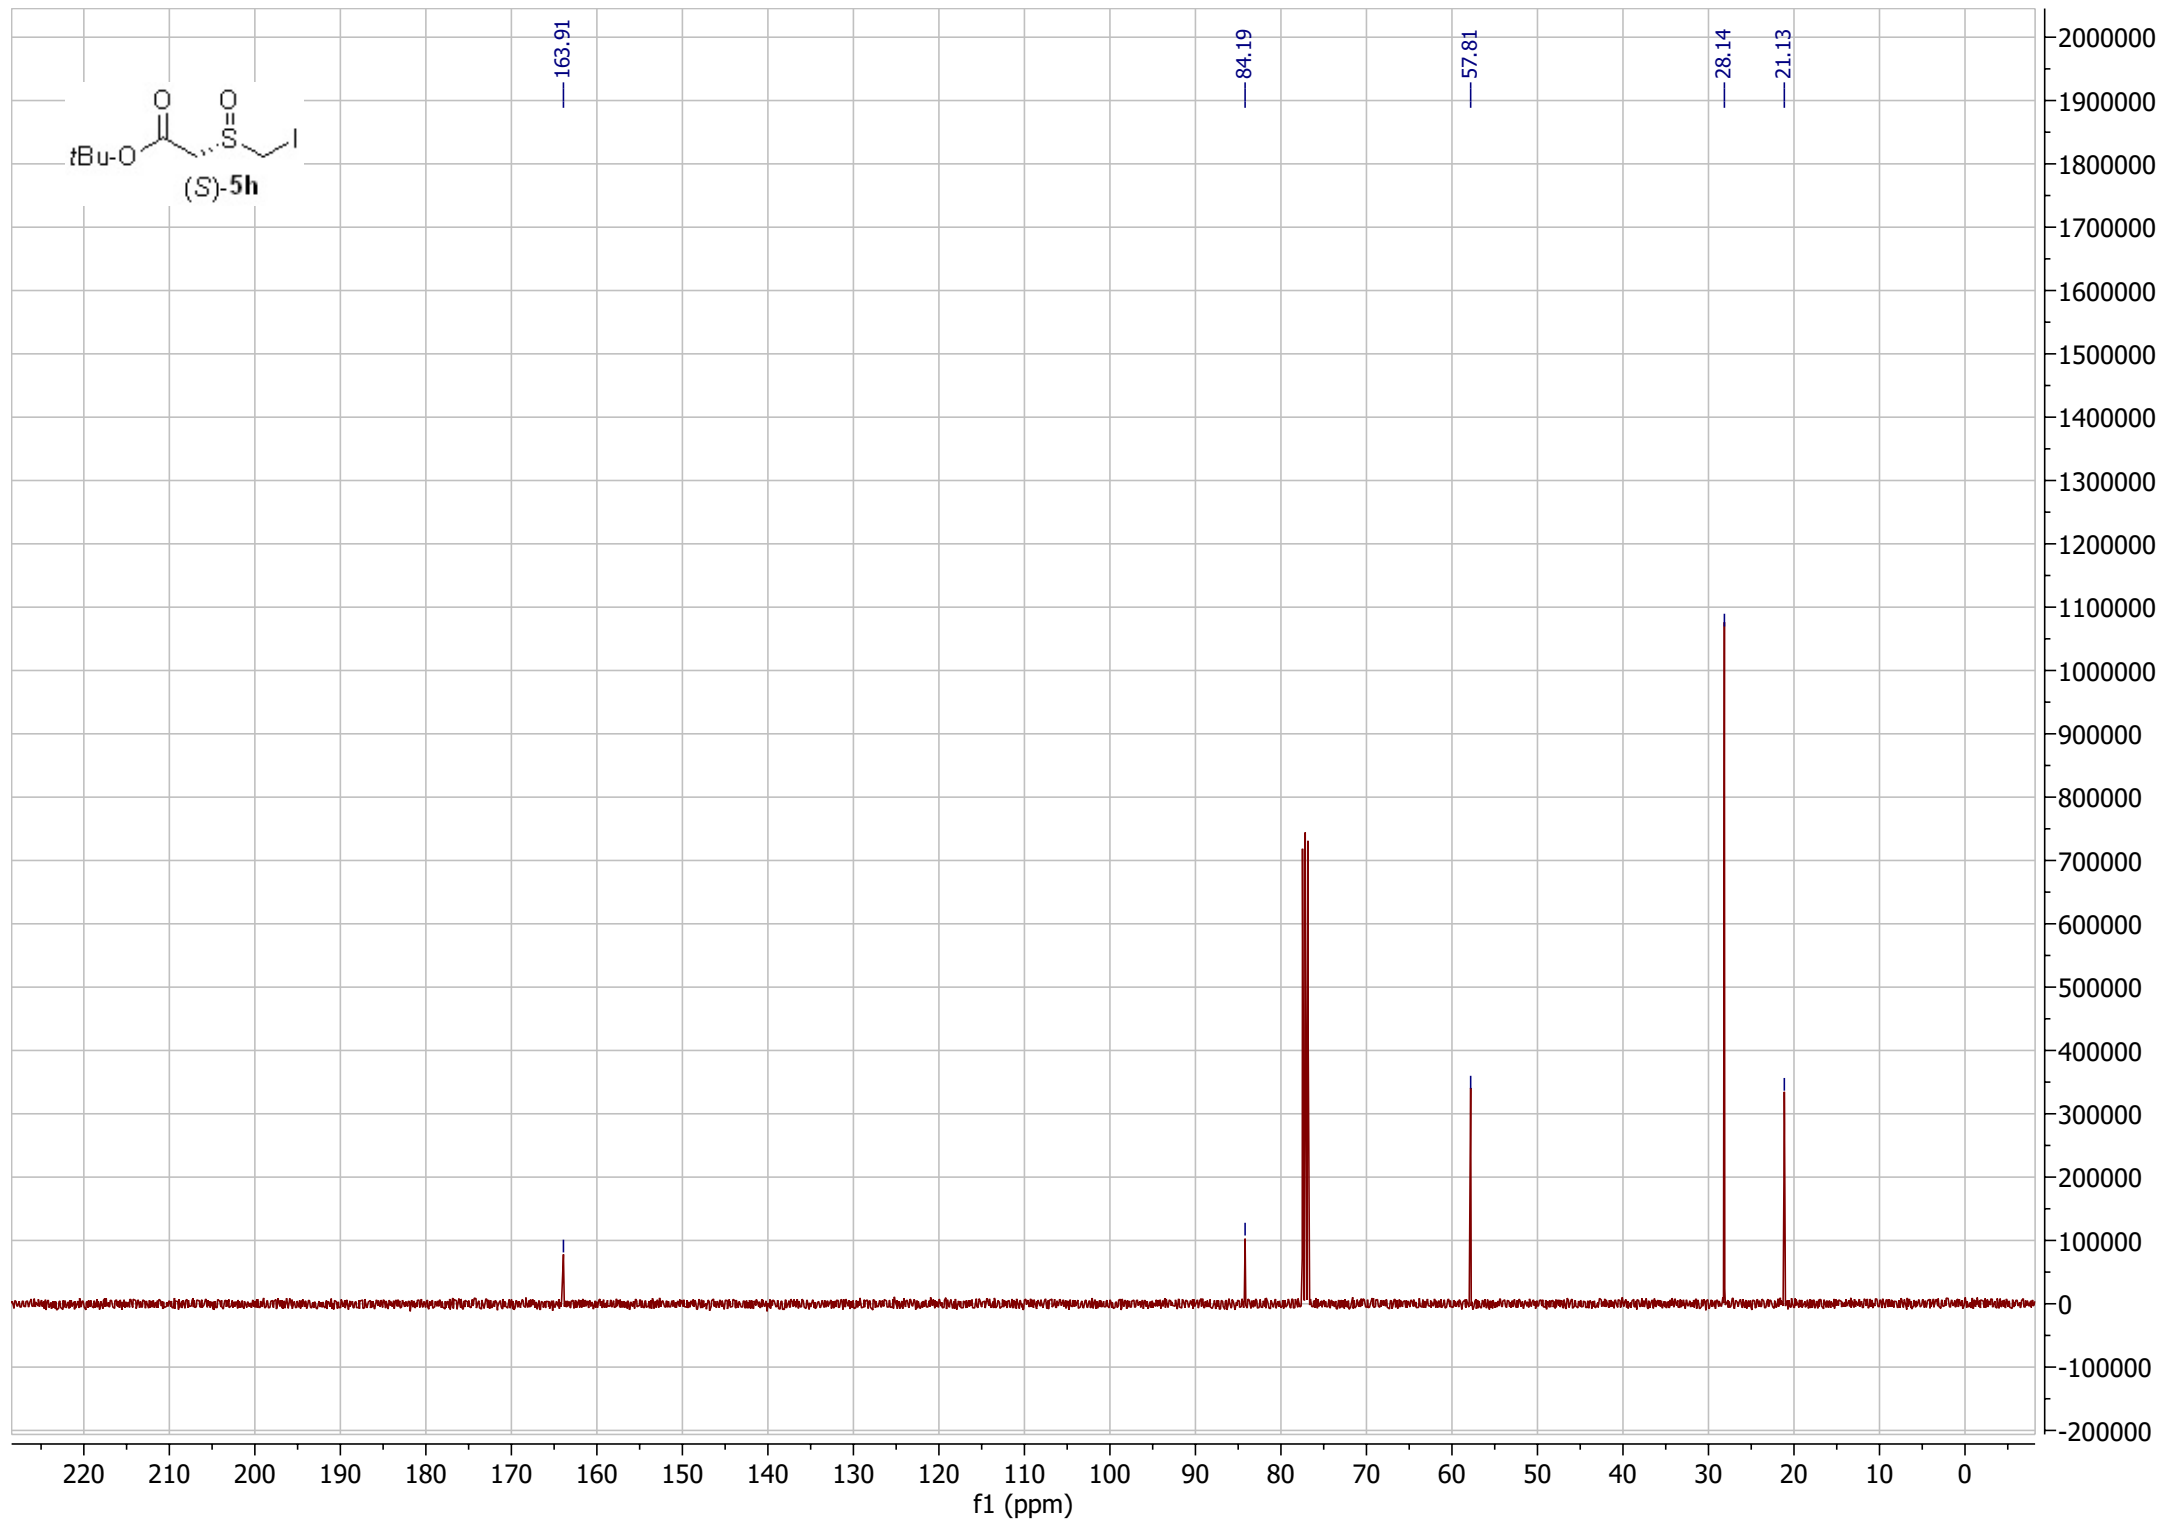

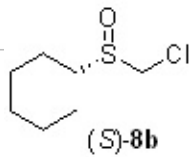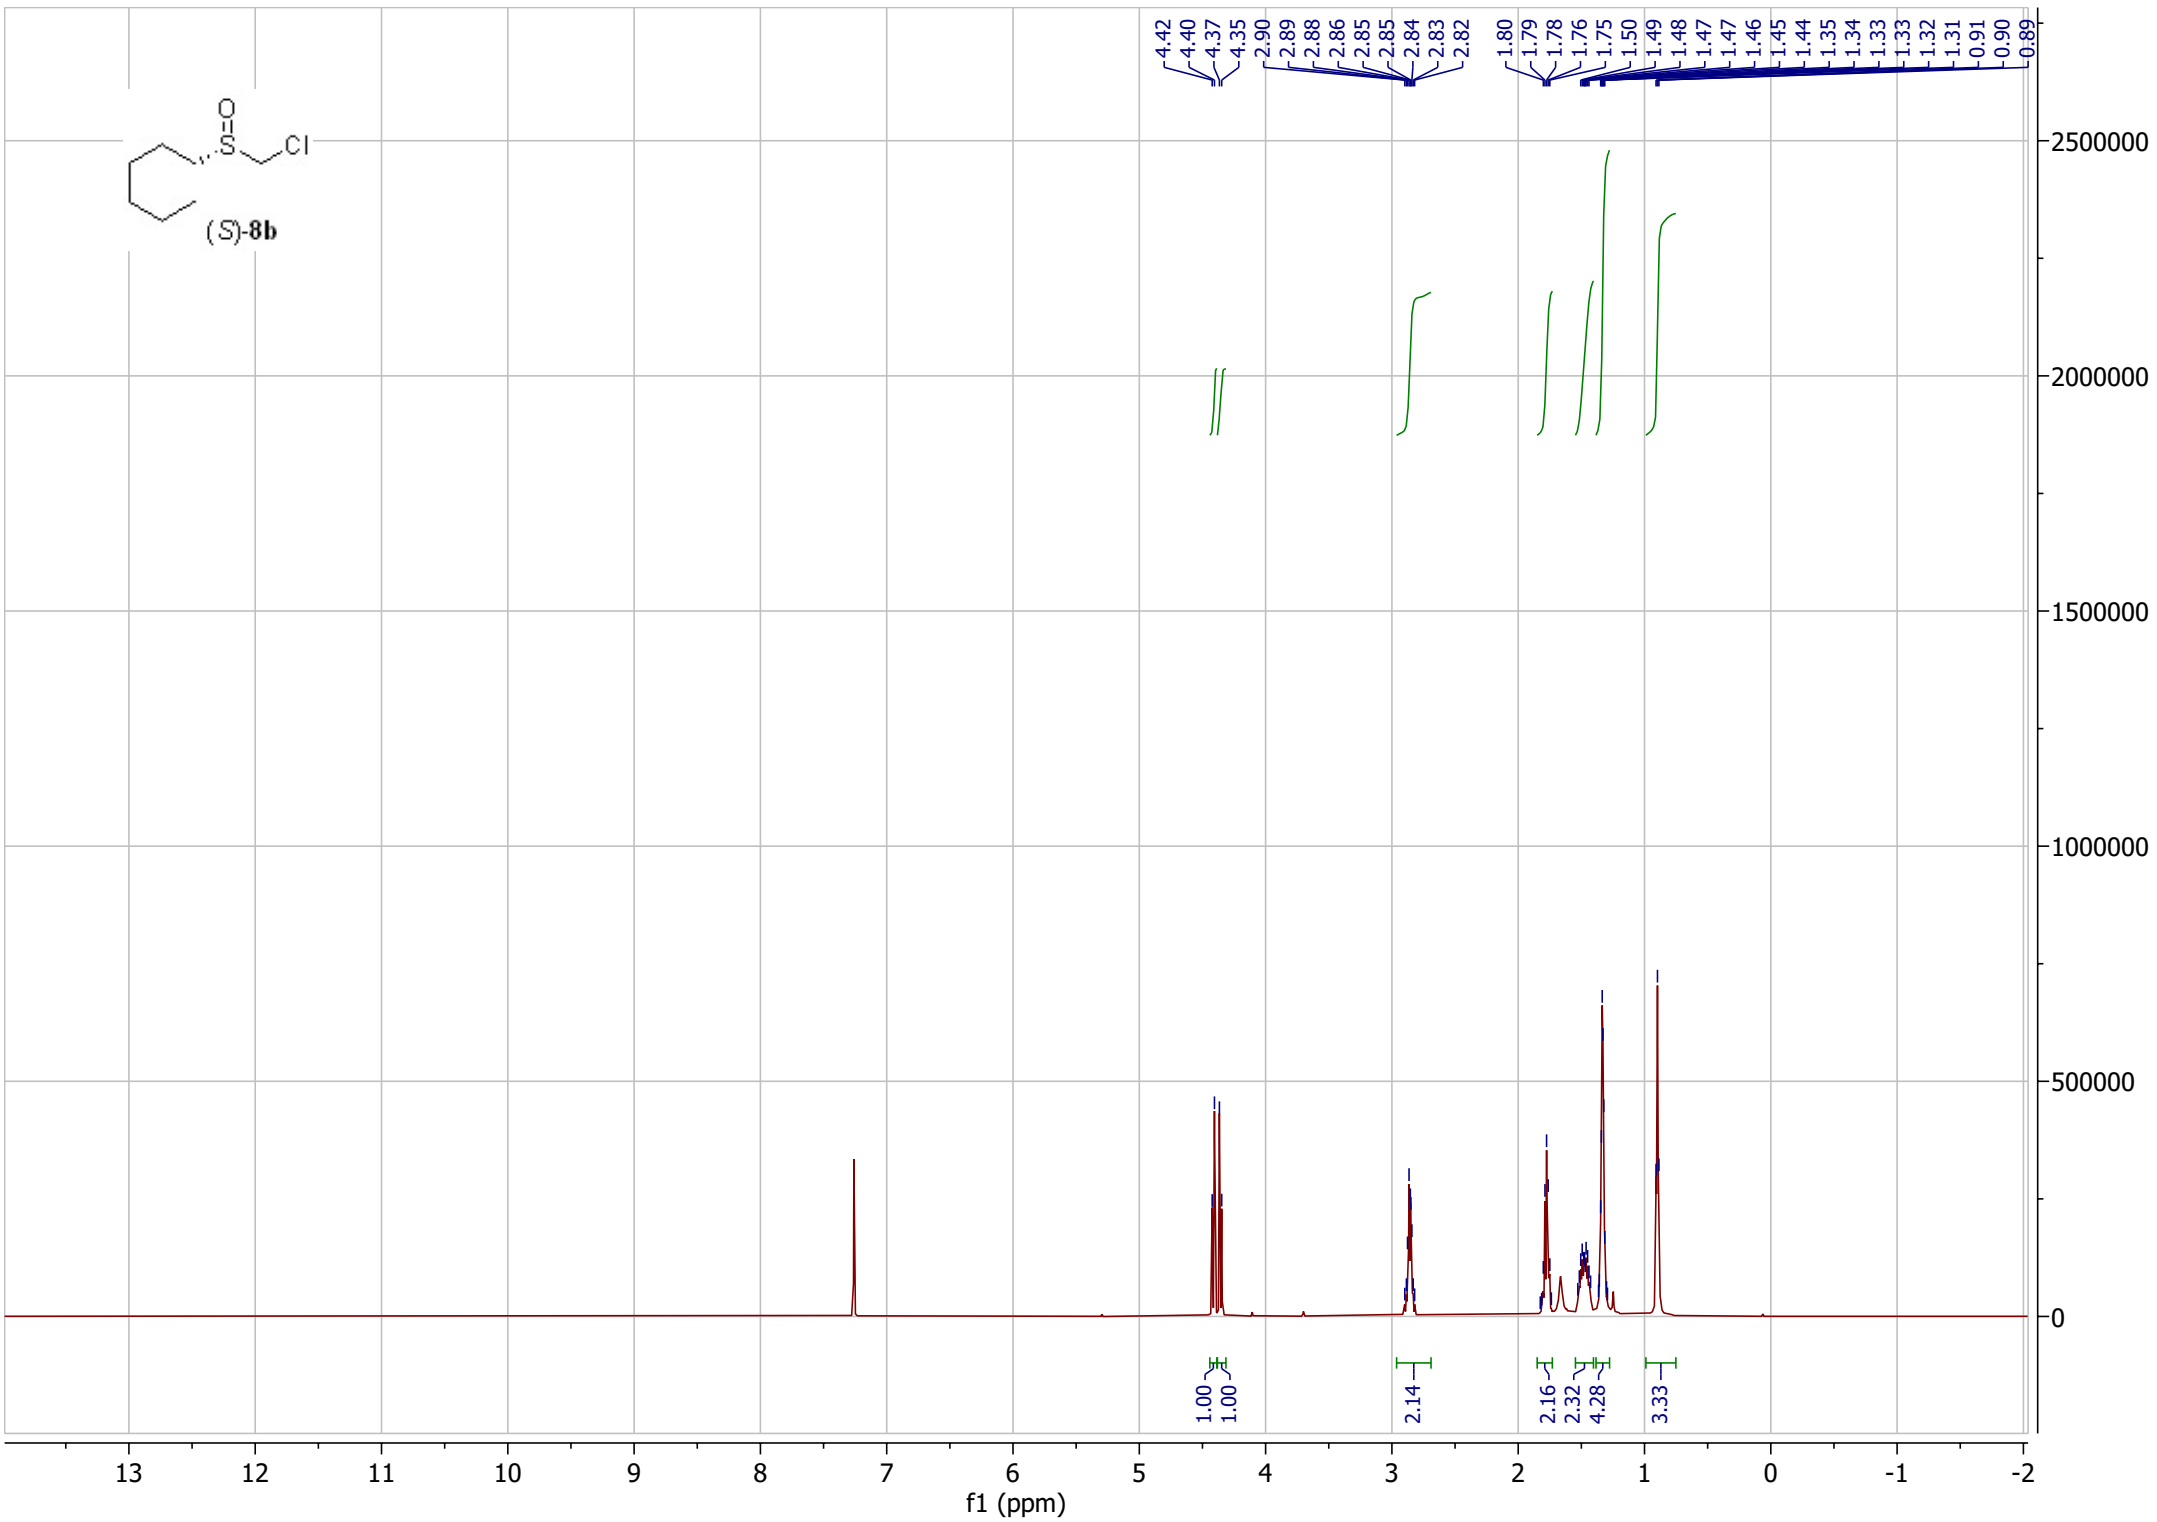

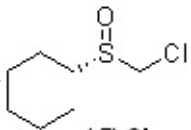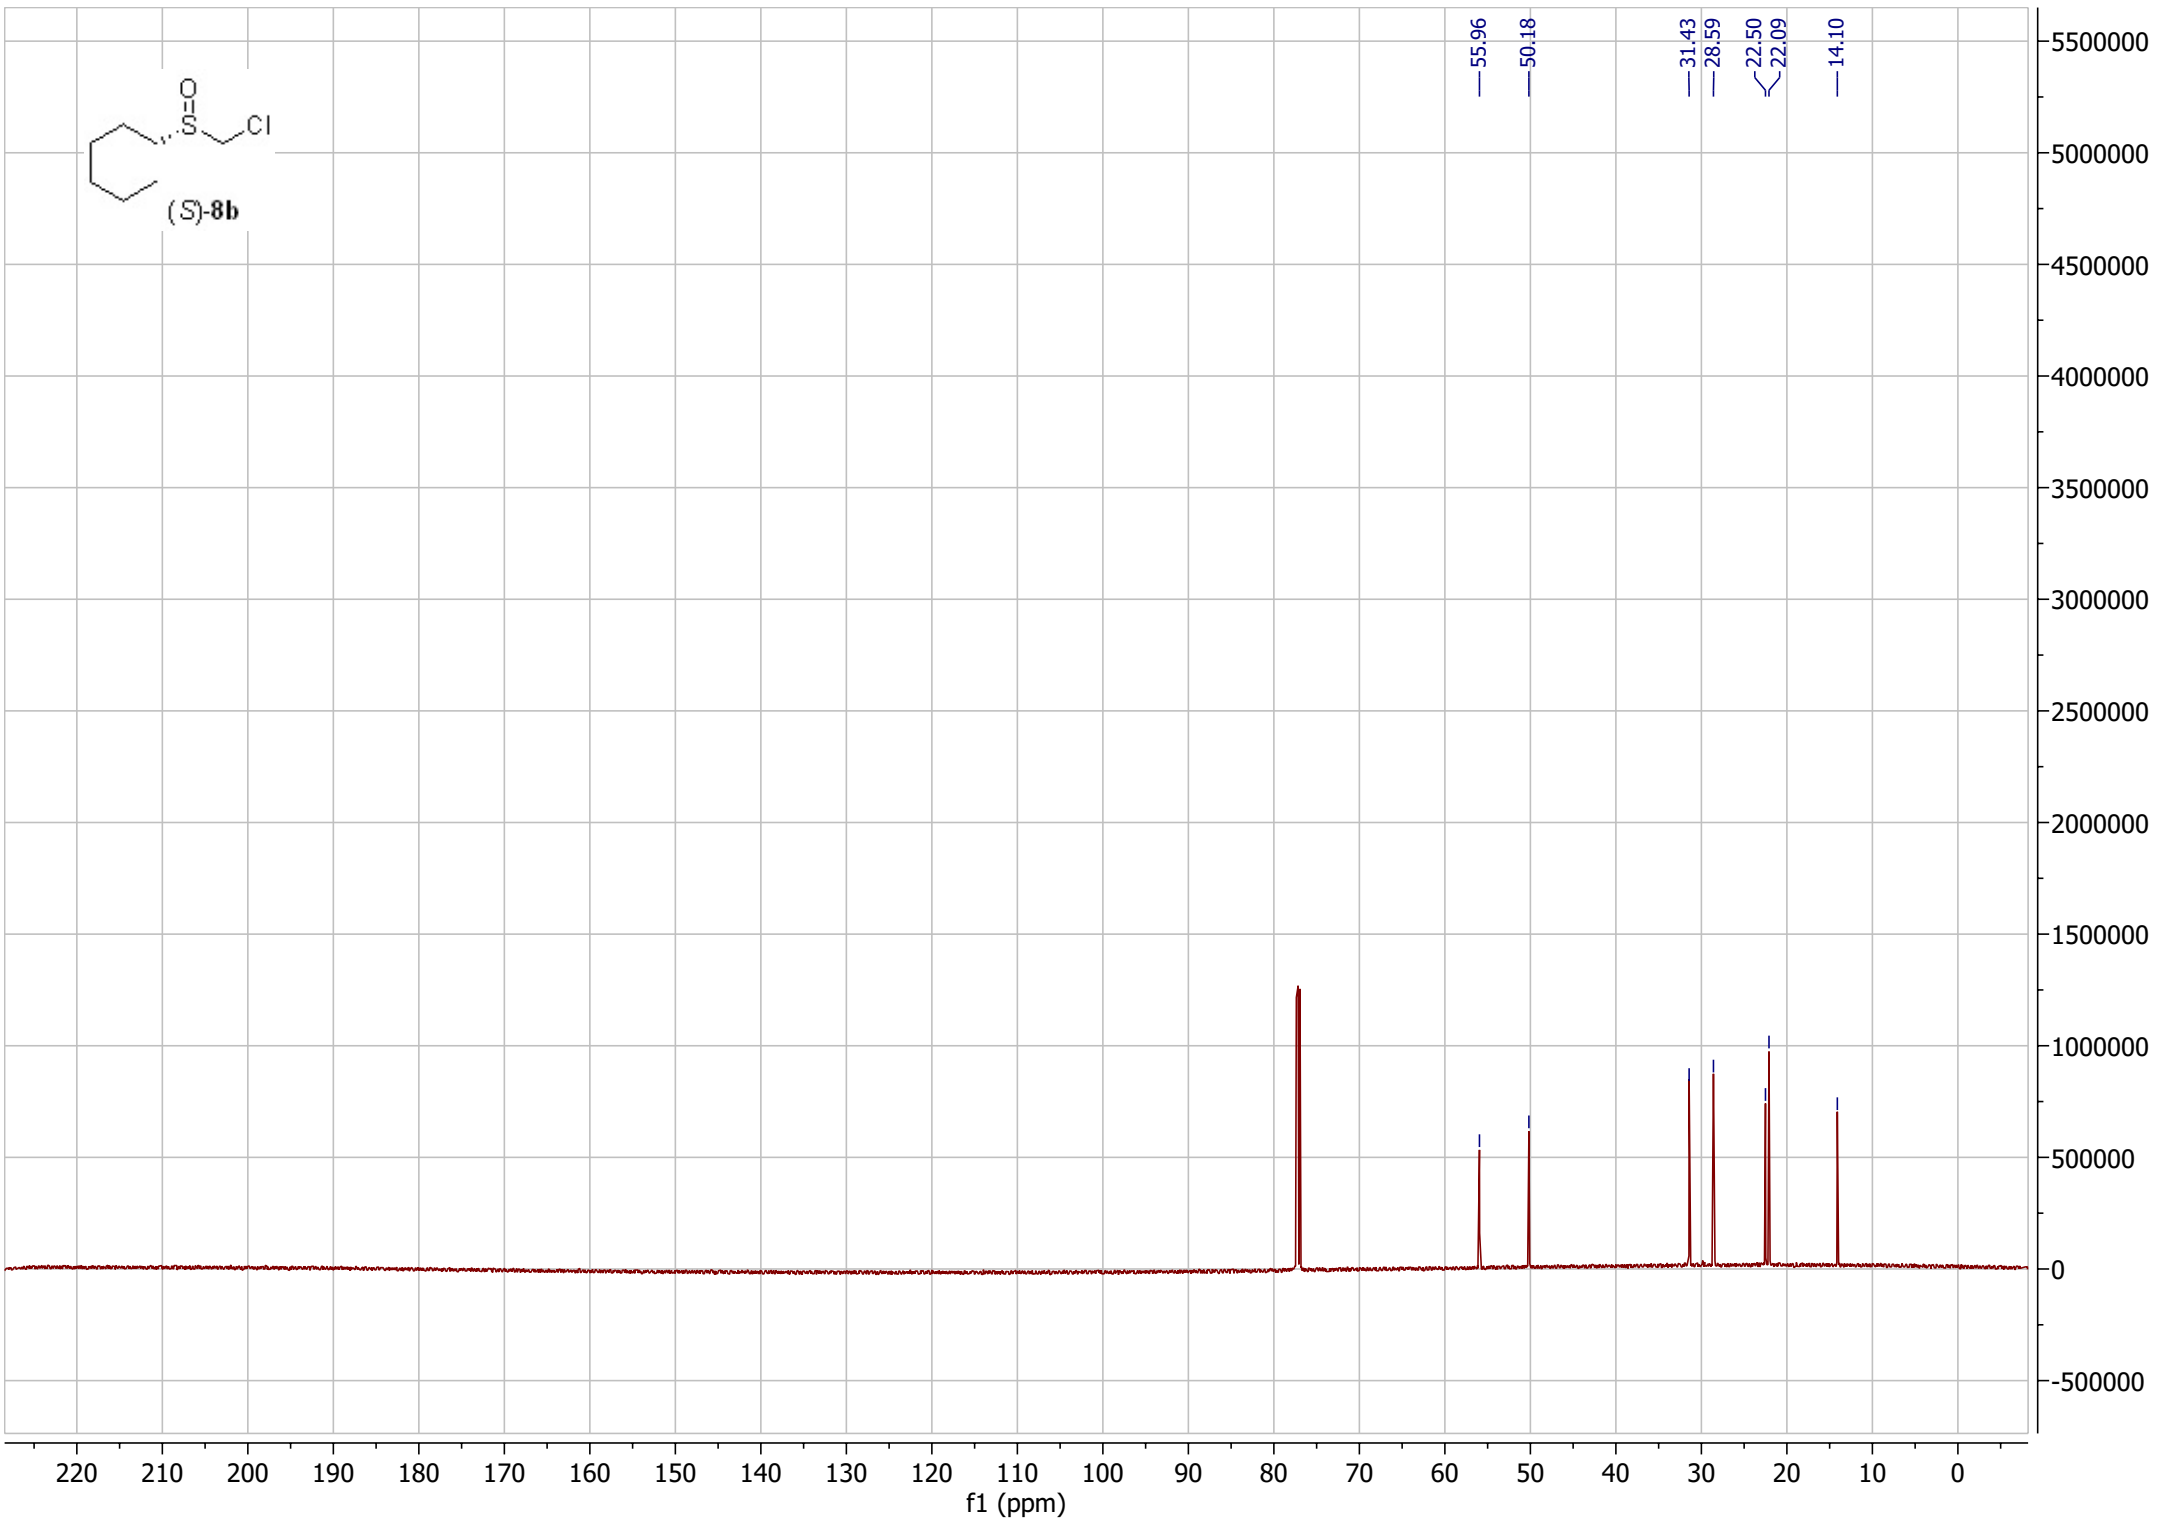



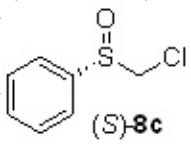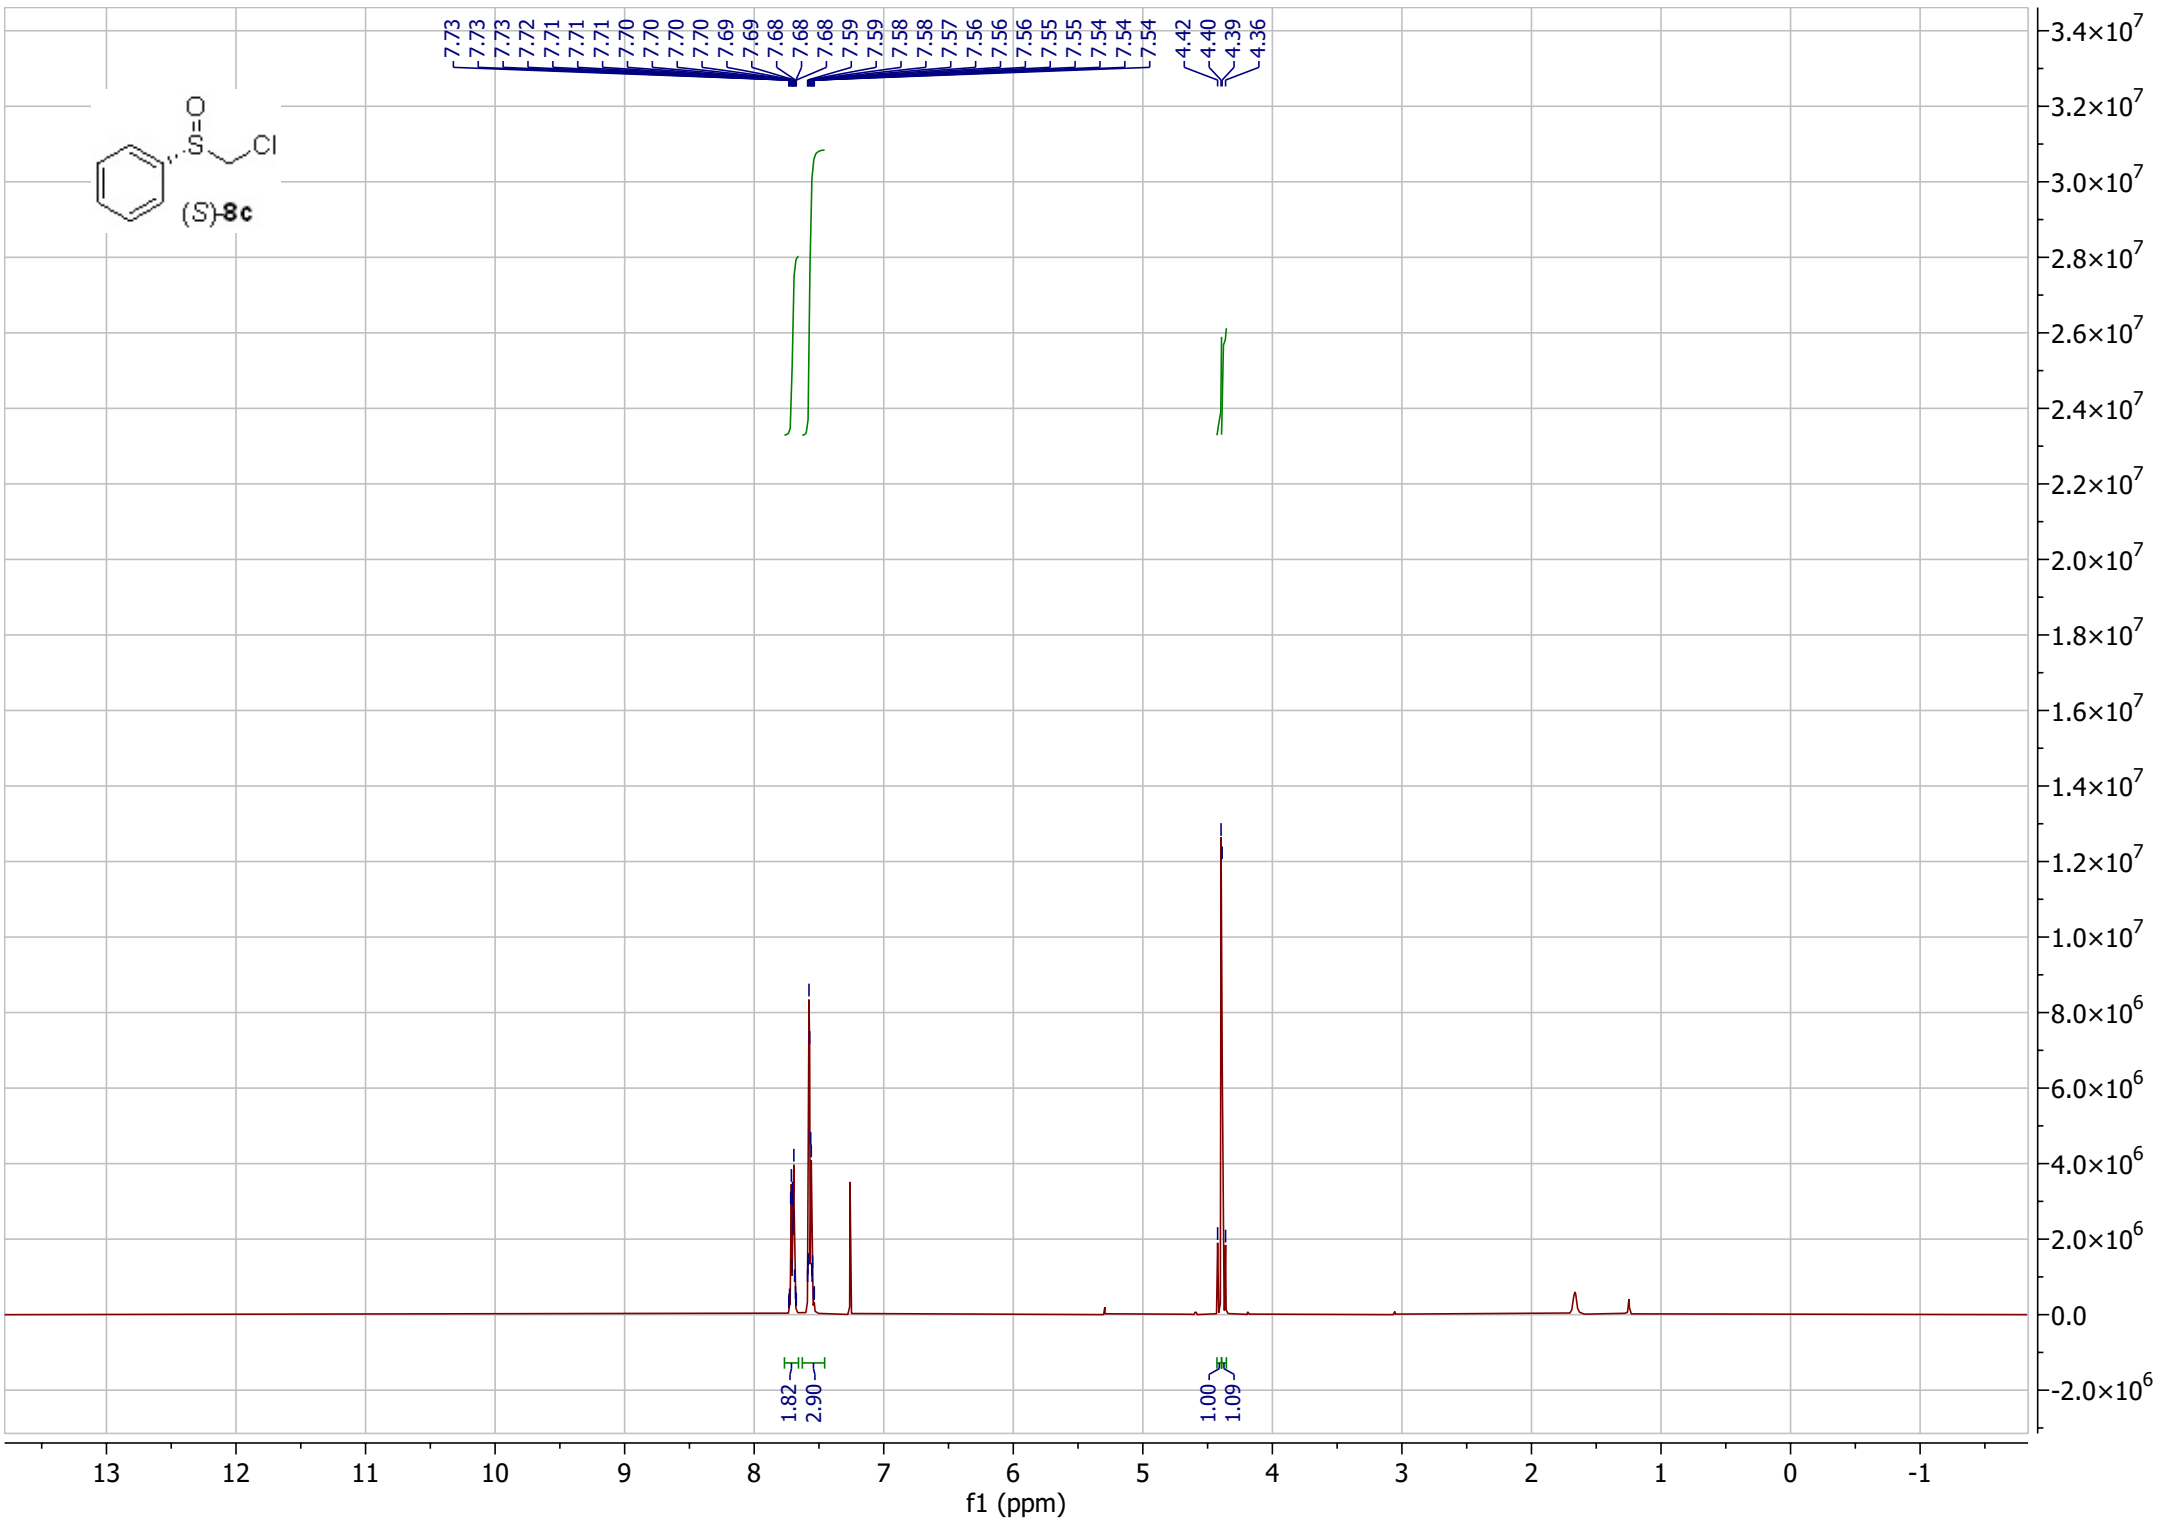

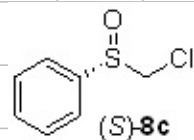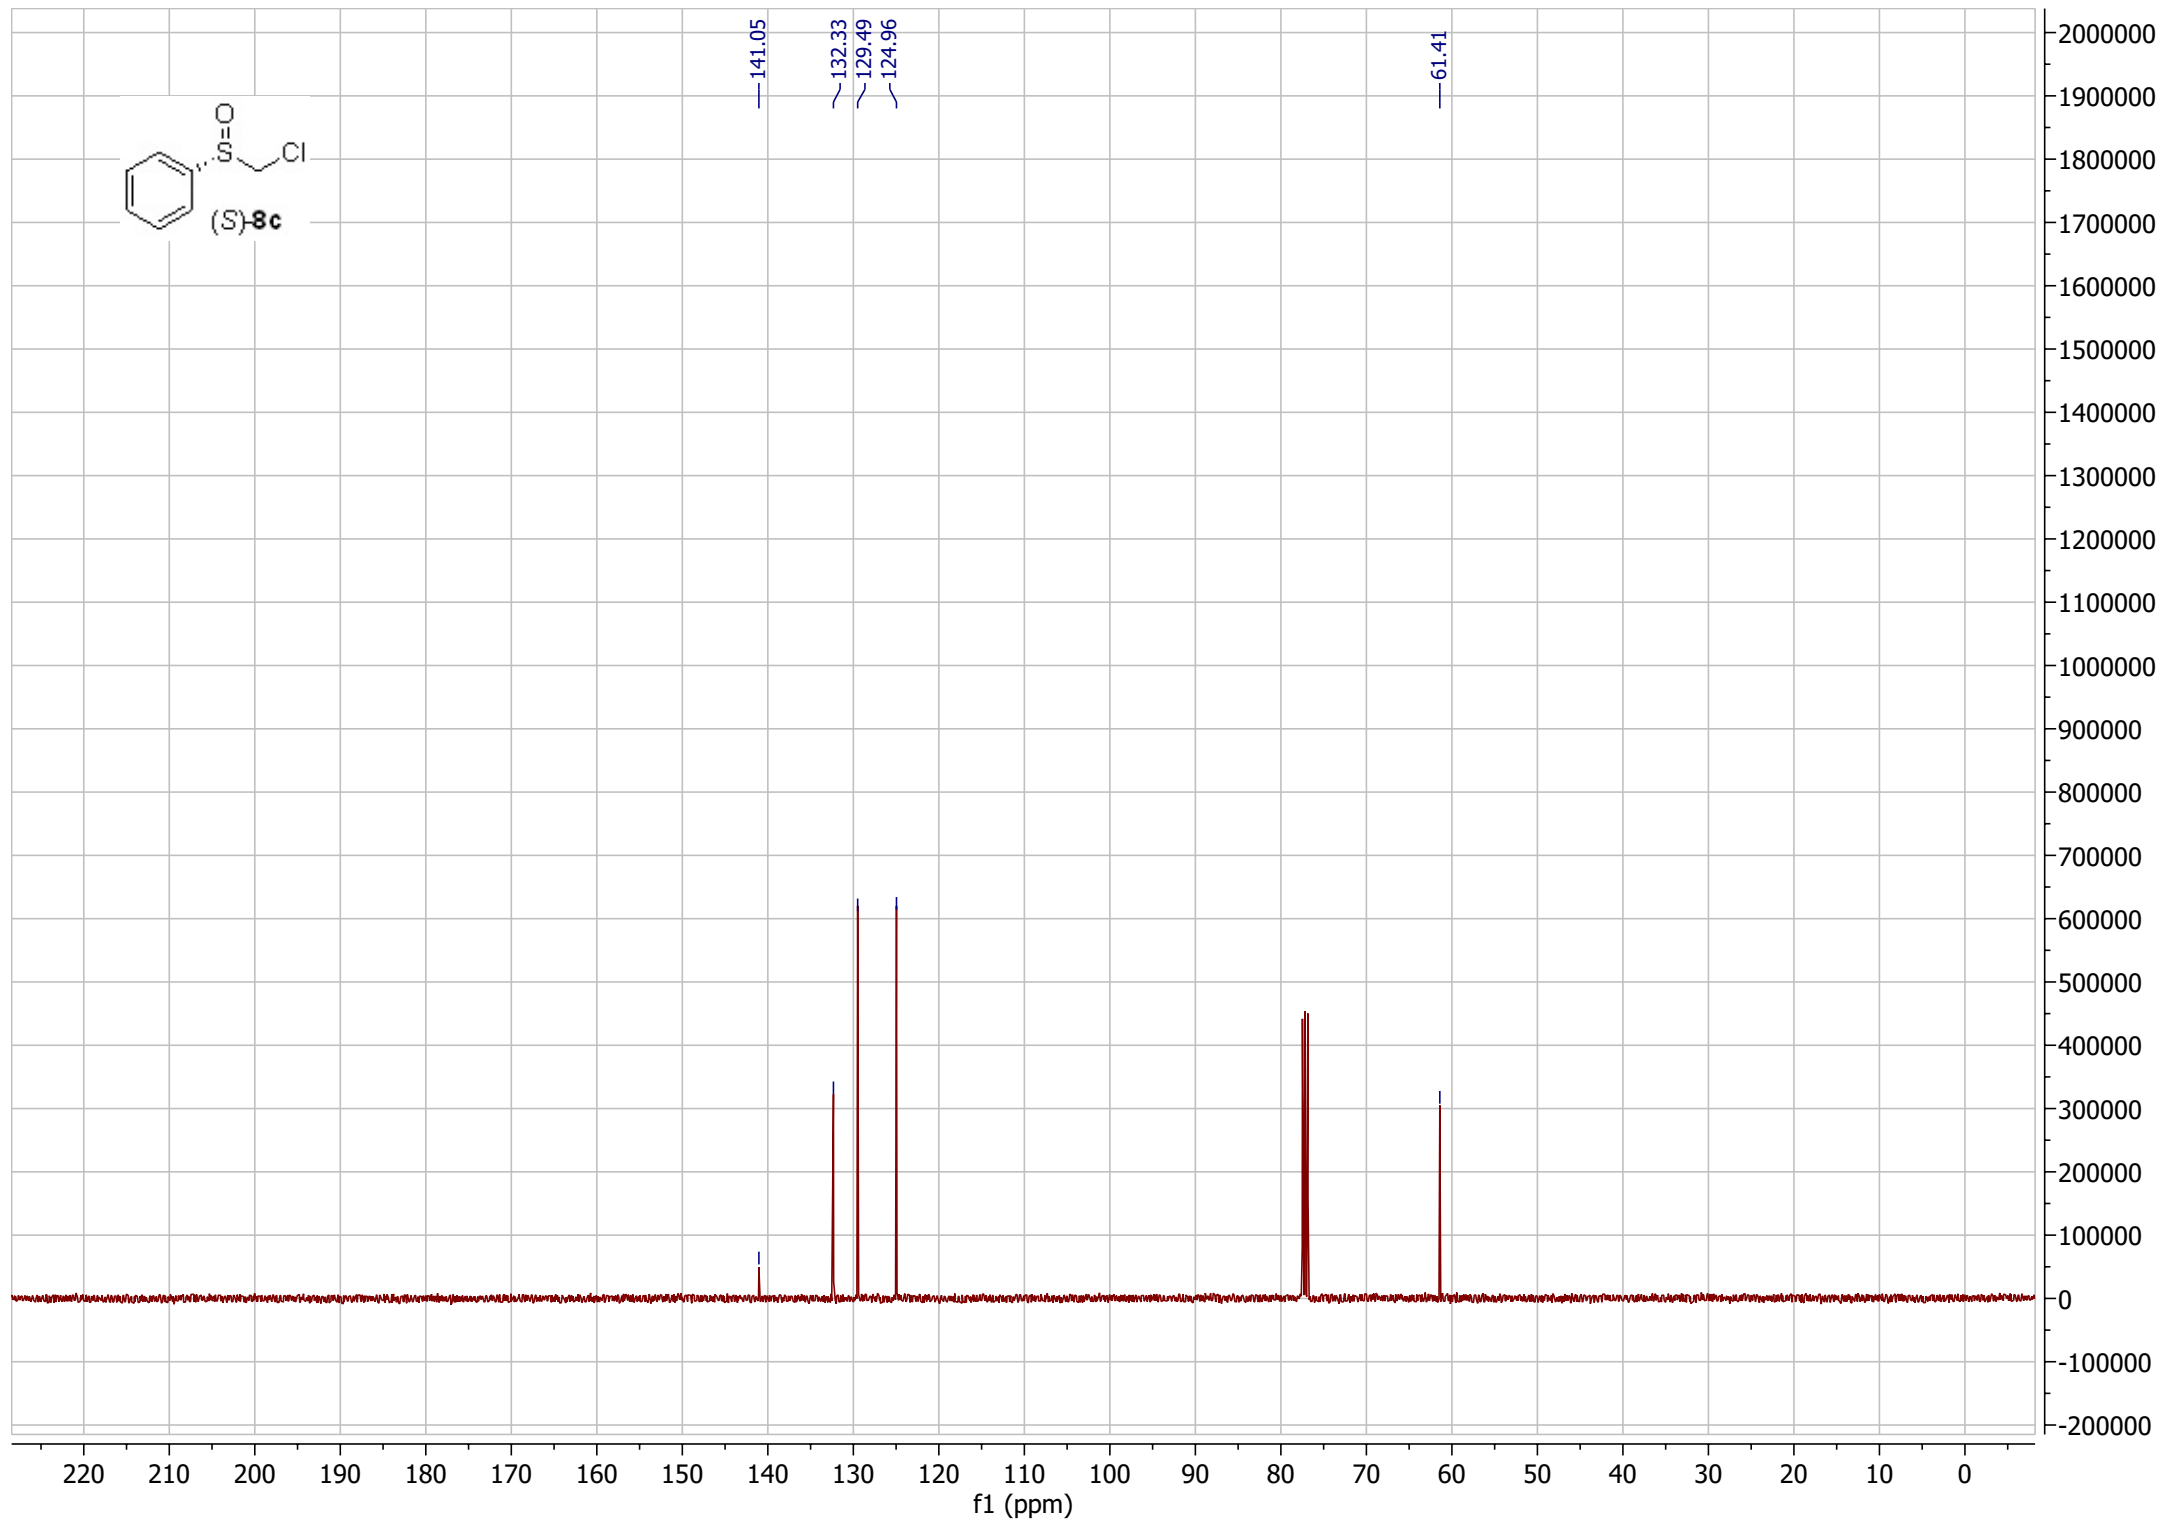

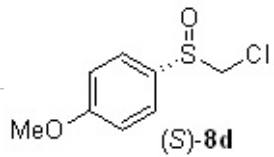

7.66  
7.65  
7.64  
7.63  
7.62  
7.61  
7.07  
7.06  
7.05  
7.04  
7.04  
7.03  
7.02

4.38  
4.36  
4.33  
4.31  
3.86

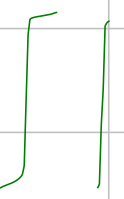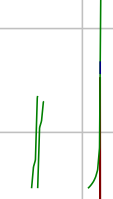

1.91

1.81

1.00  
0.94

3.09

f1 (ppm)

$6.0 \times 10^7$   
 $5.5 \times 10^7$   
 $5.0 \times 10^7$   
 $4.5 \times 10^7$   
 $4.0 \times 10^7$   
 $3.5 \times 10^7$   
 $3.0 \times 10^7$   
 $2.5 \times 10^7$   
 $2.0 \times 10^7$   
 $1.5 \times 10^7$   
 $1.0 \times 10^7$   
 $5.0 \times 10^6$   
 $0.0$   
 $-5.0 \times 10^6$

13 12 11 10 9 8 7 6 5 4 3 2 1 0 -1

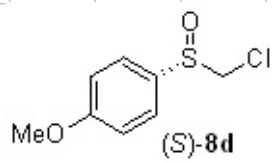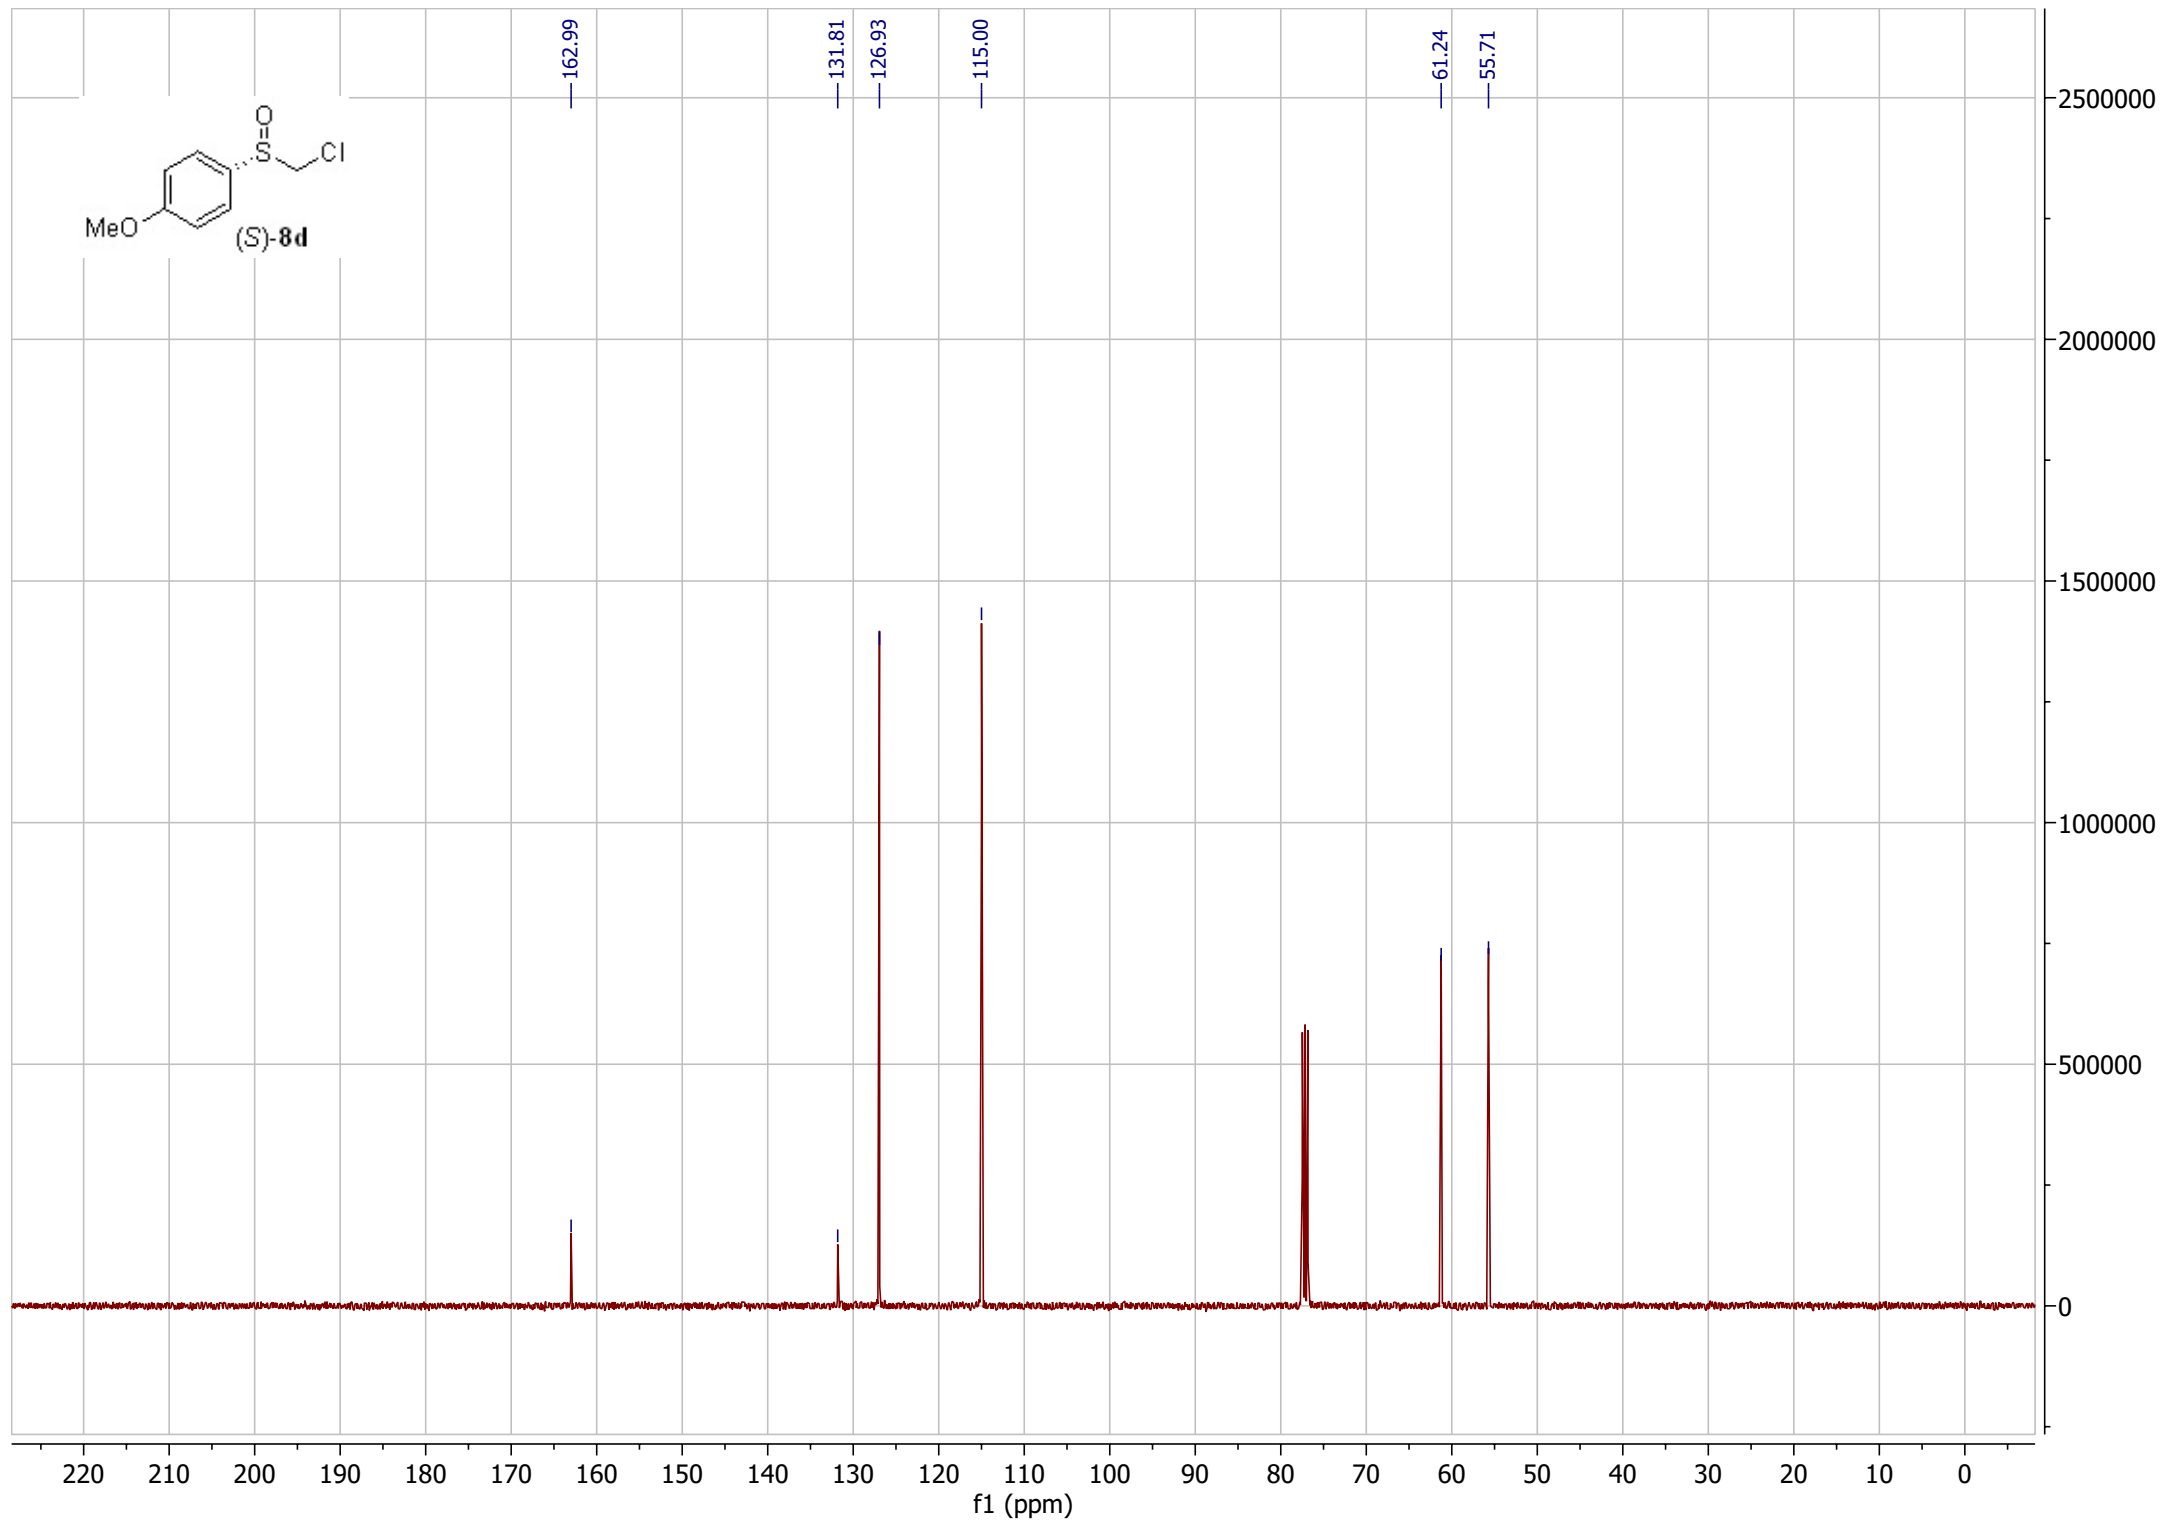

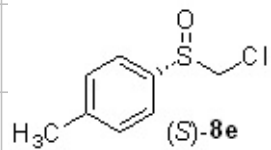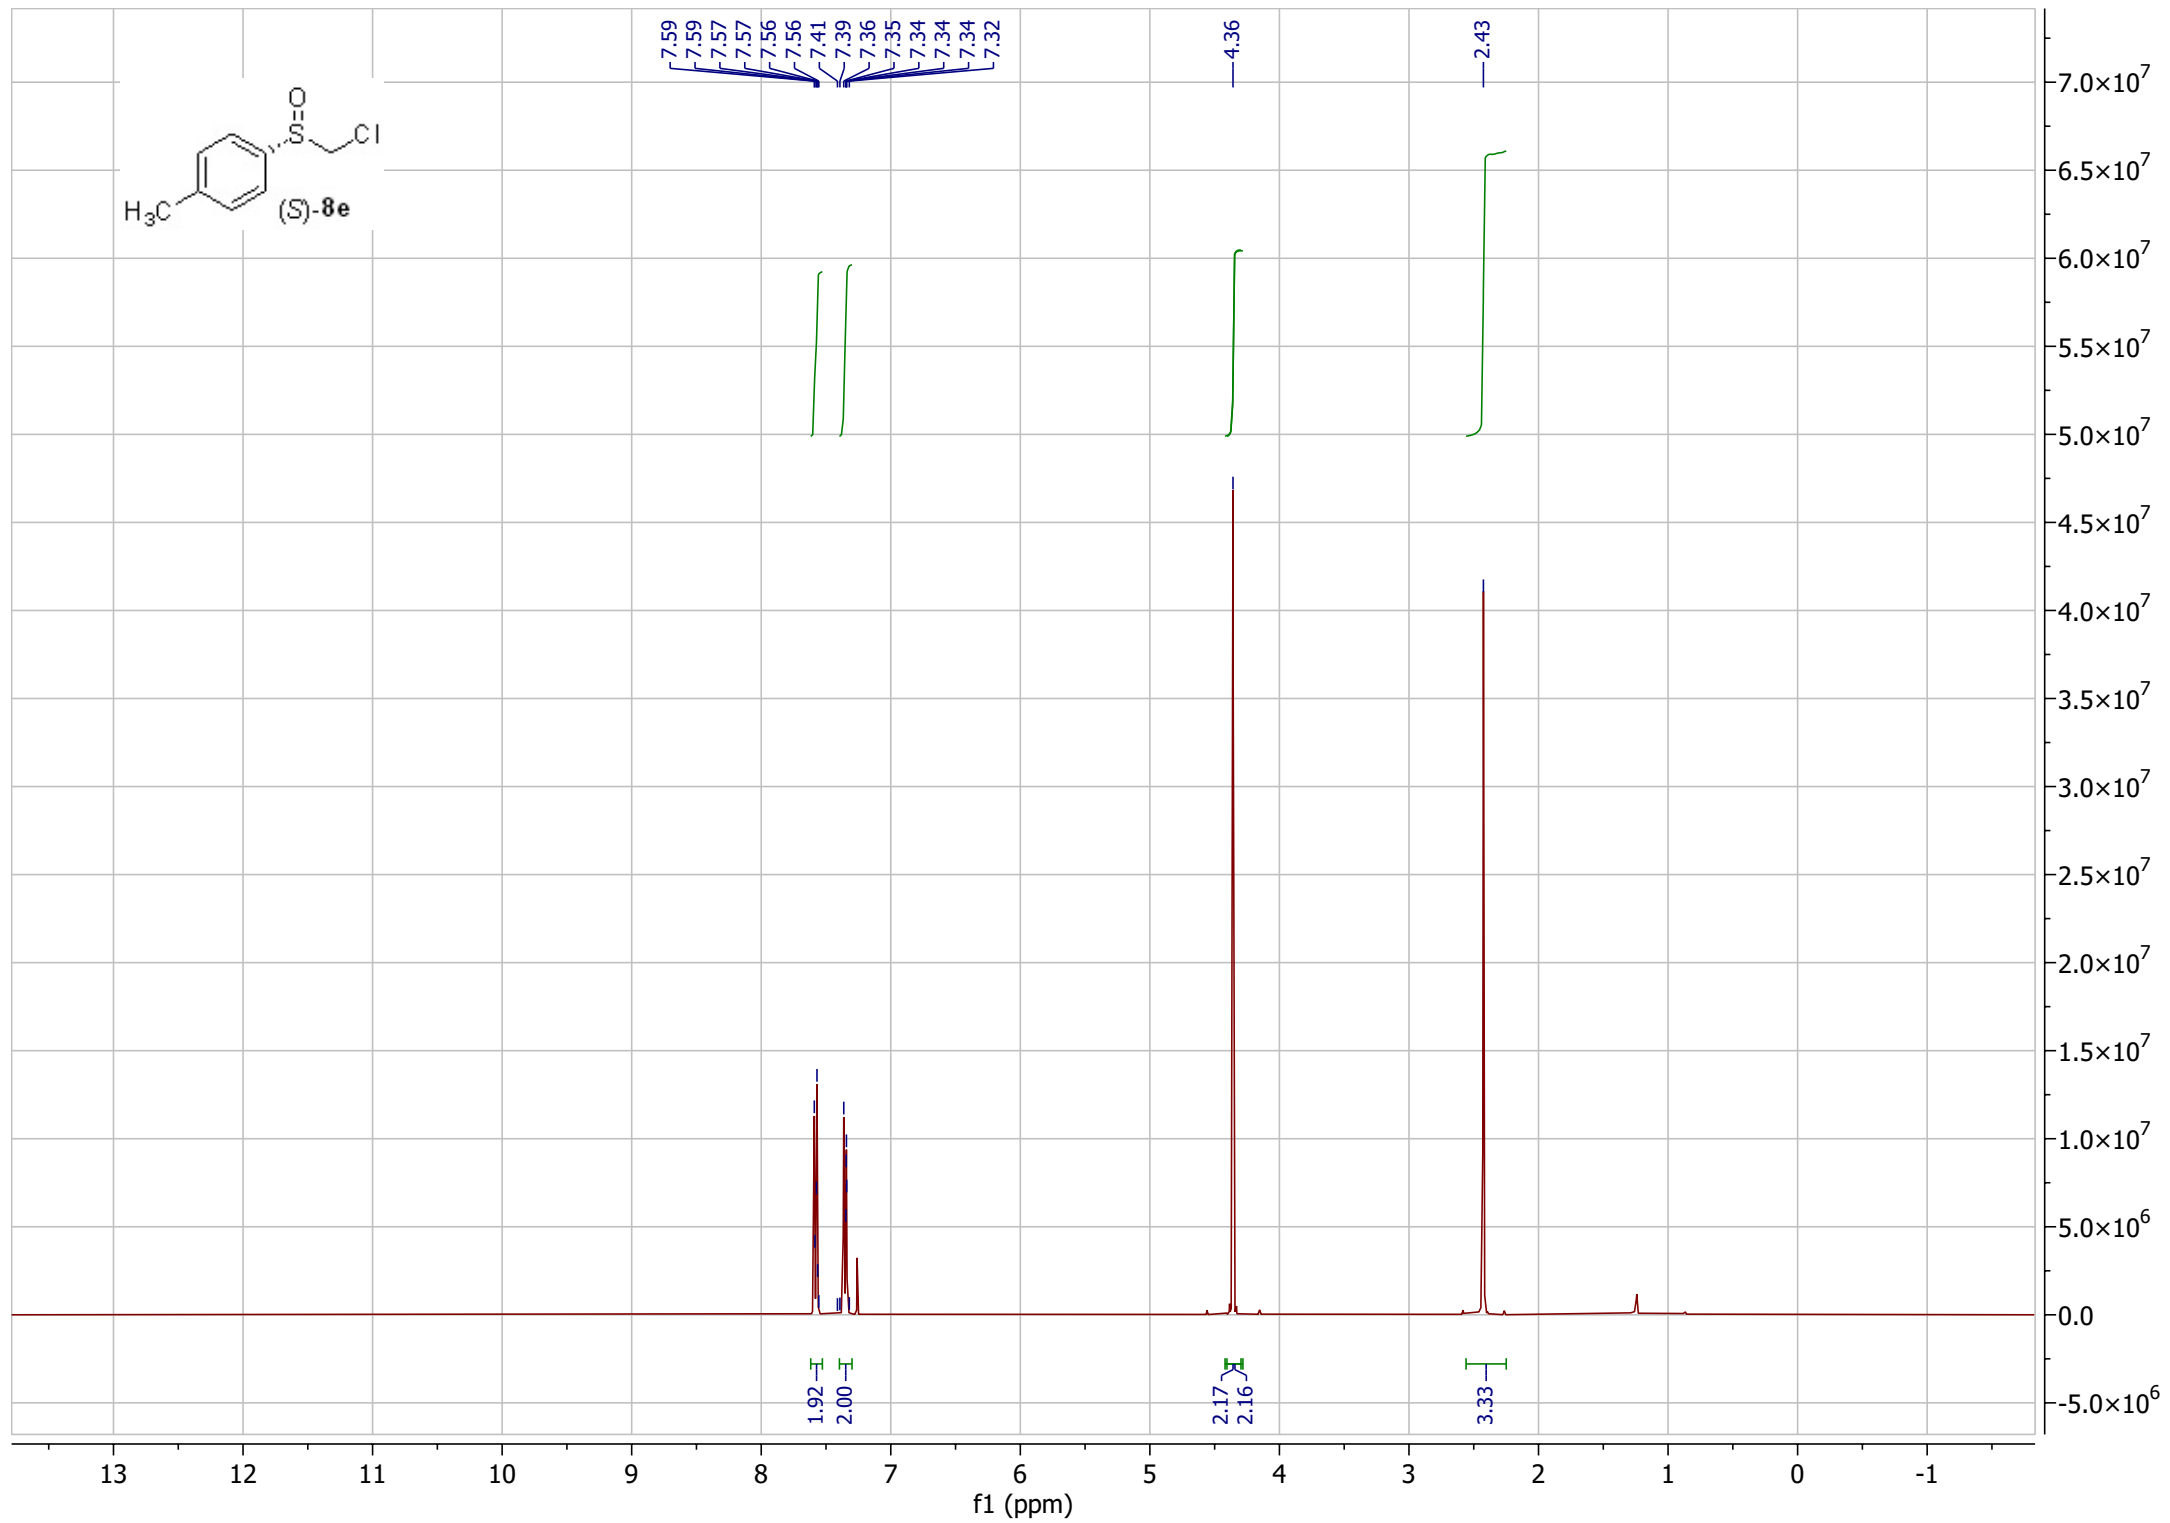

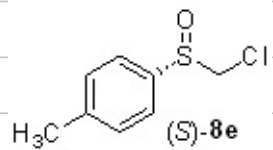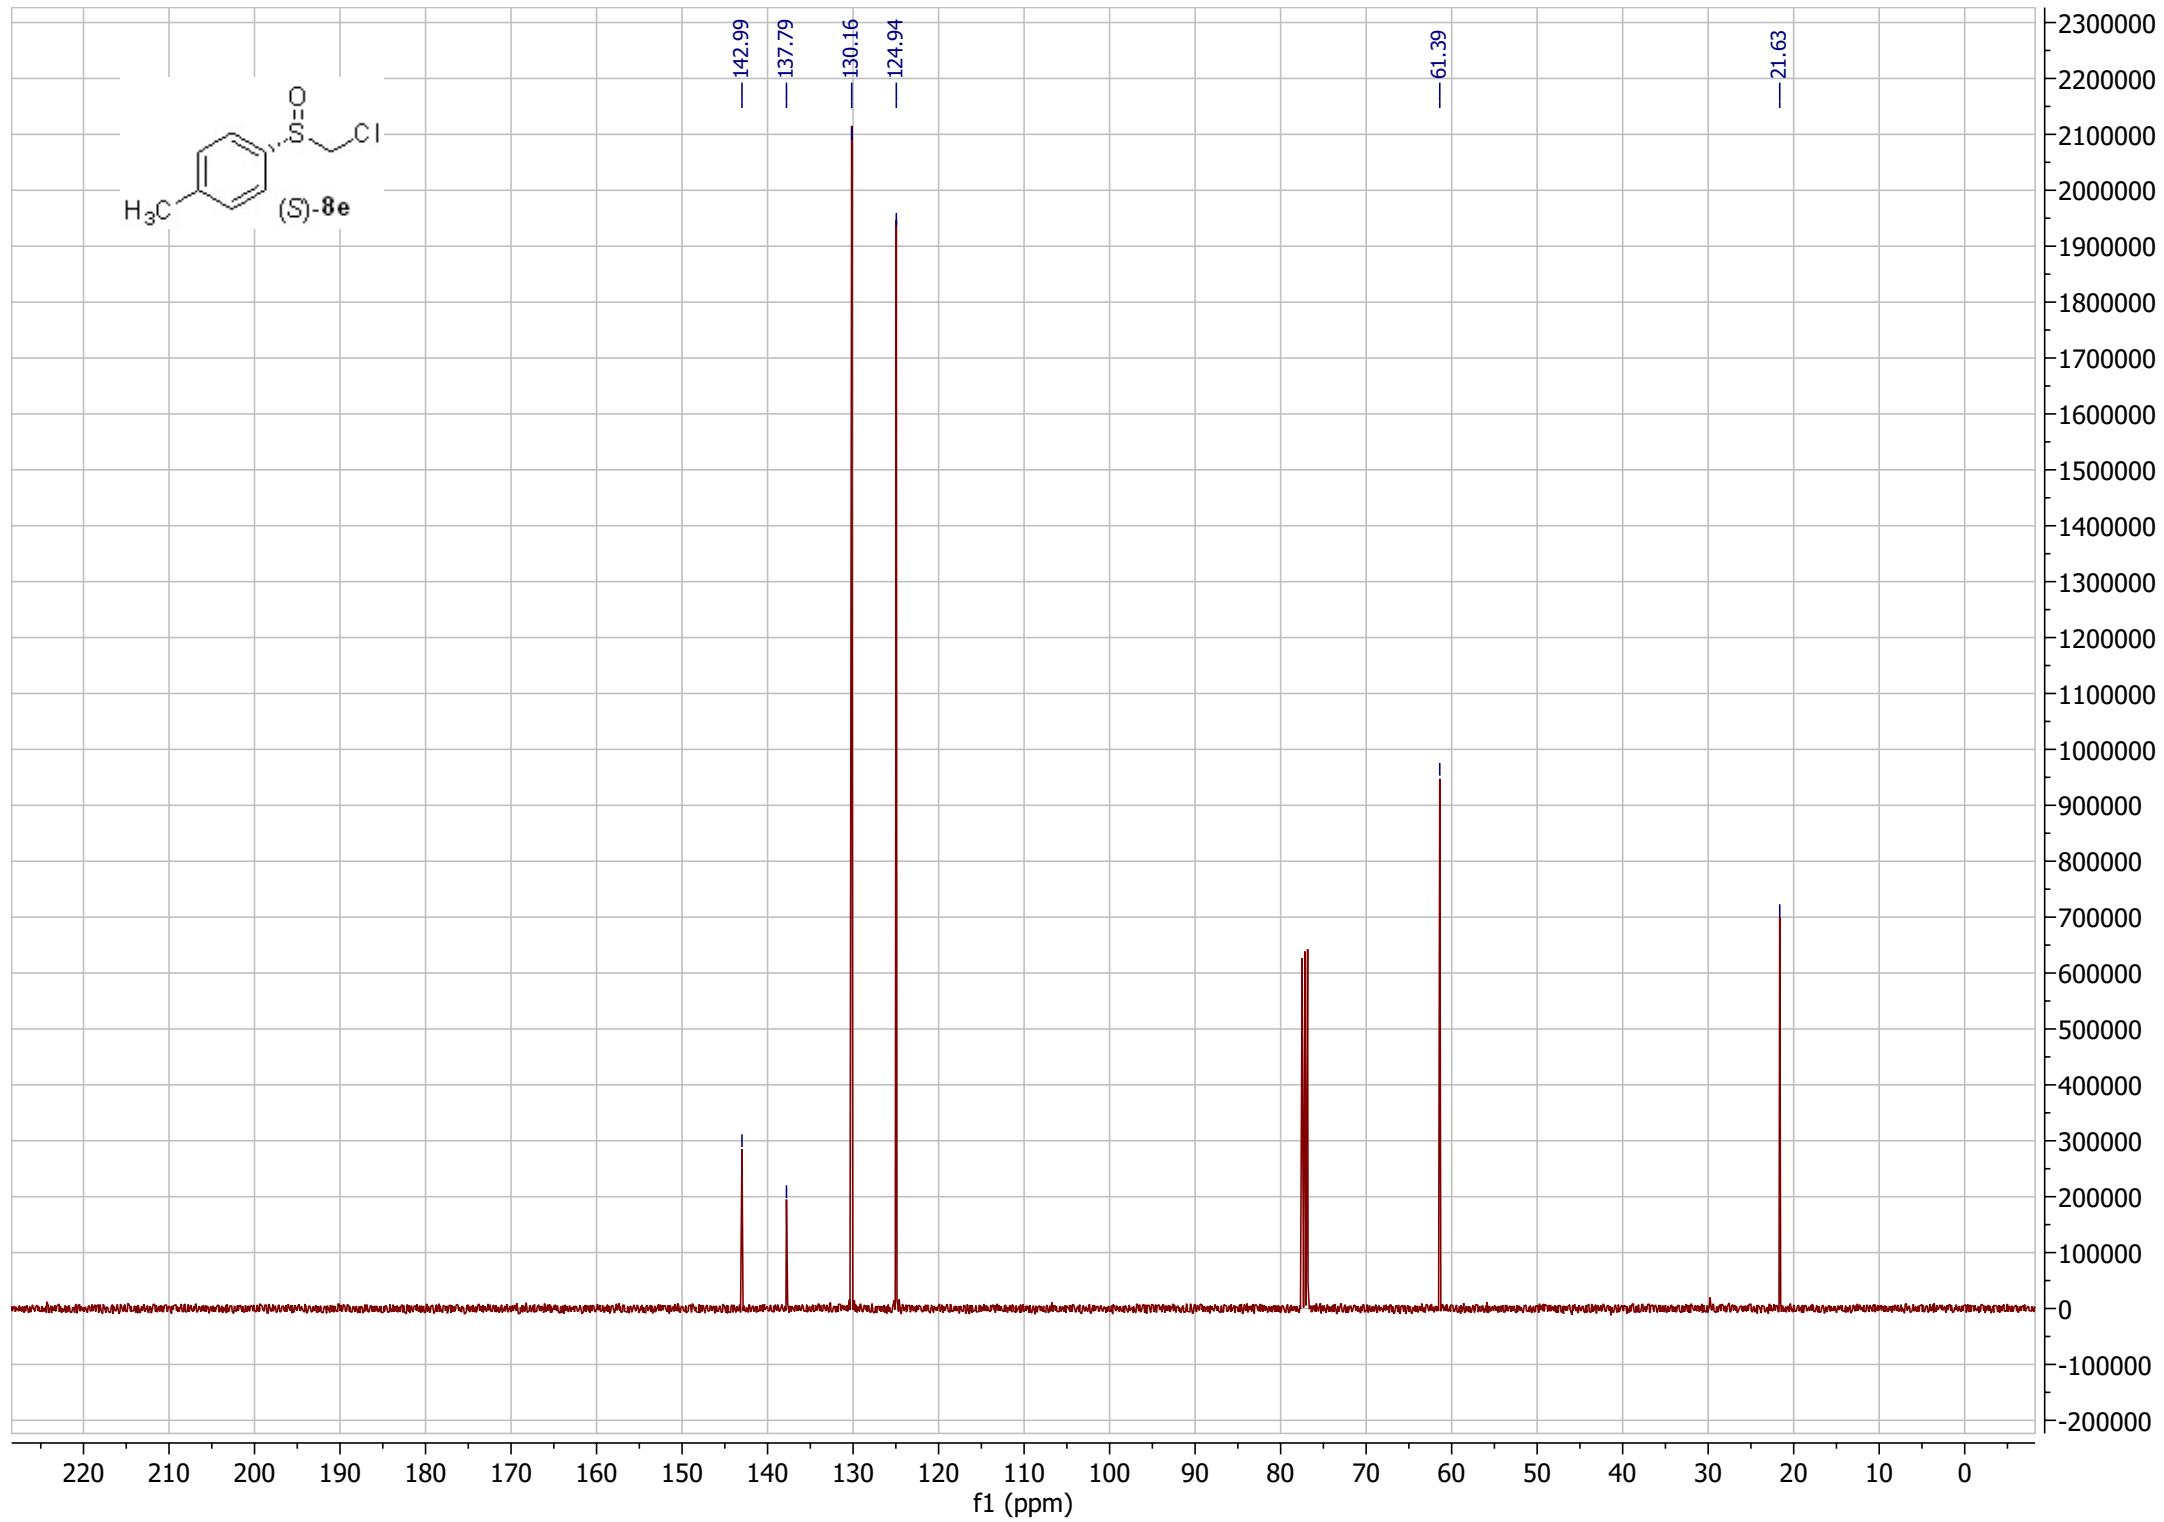

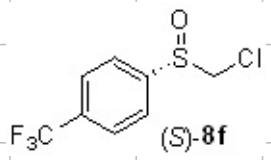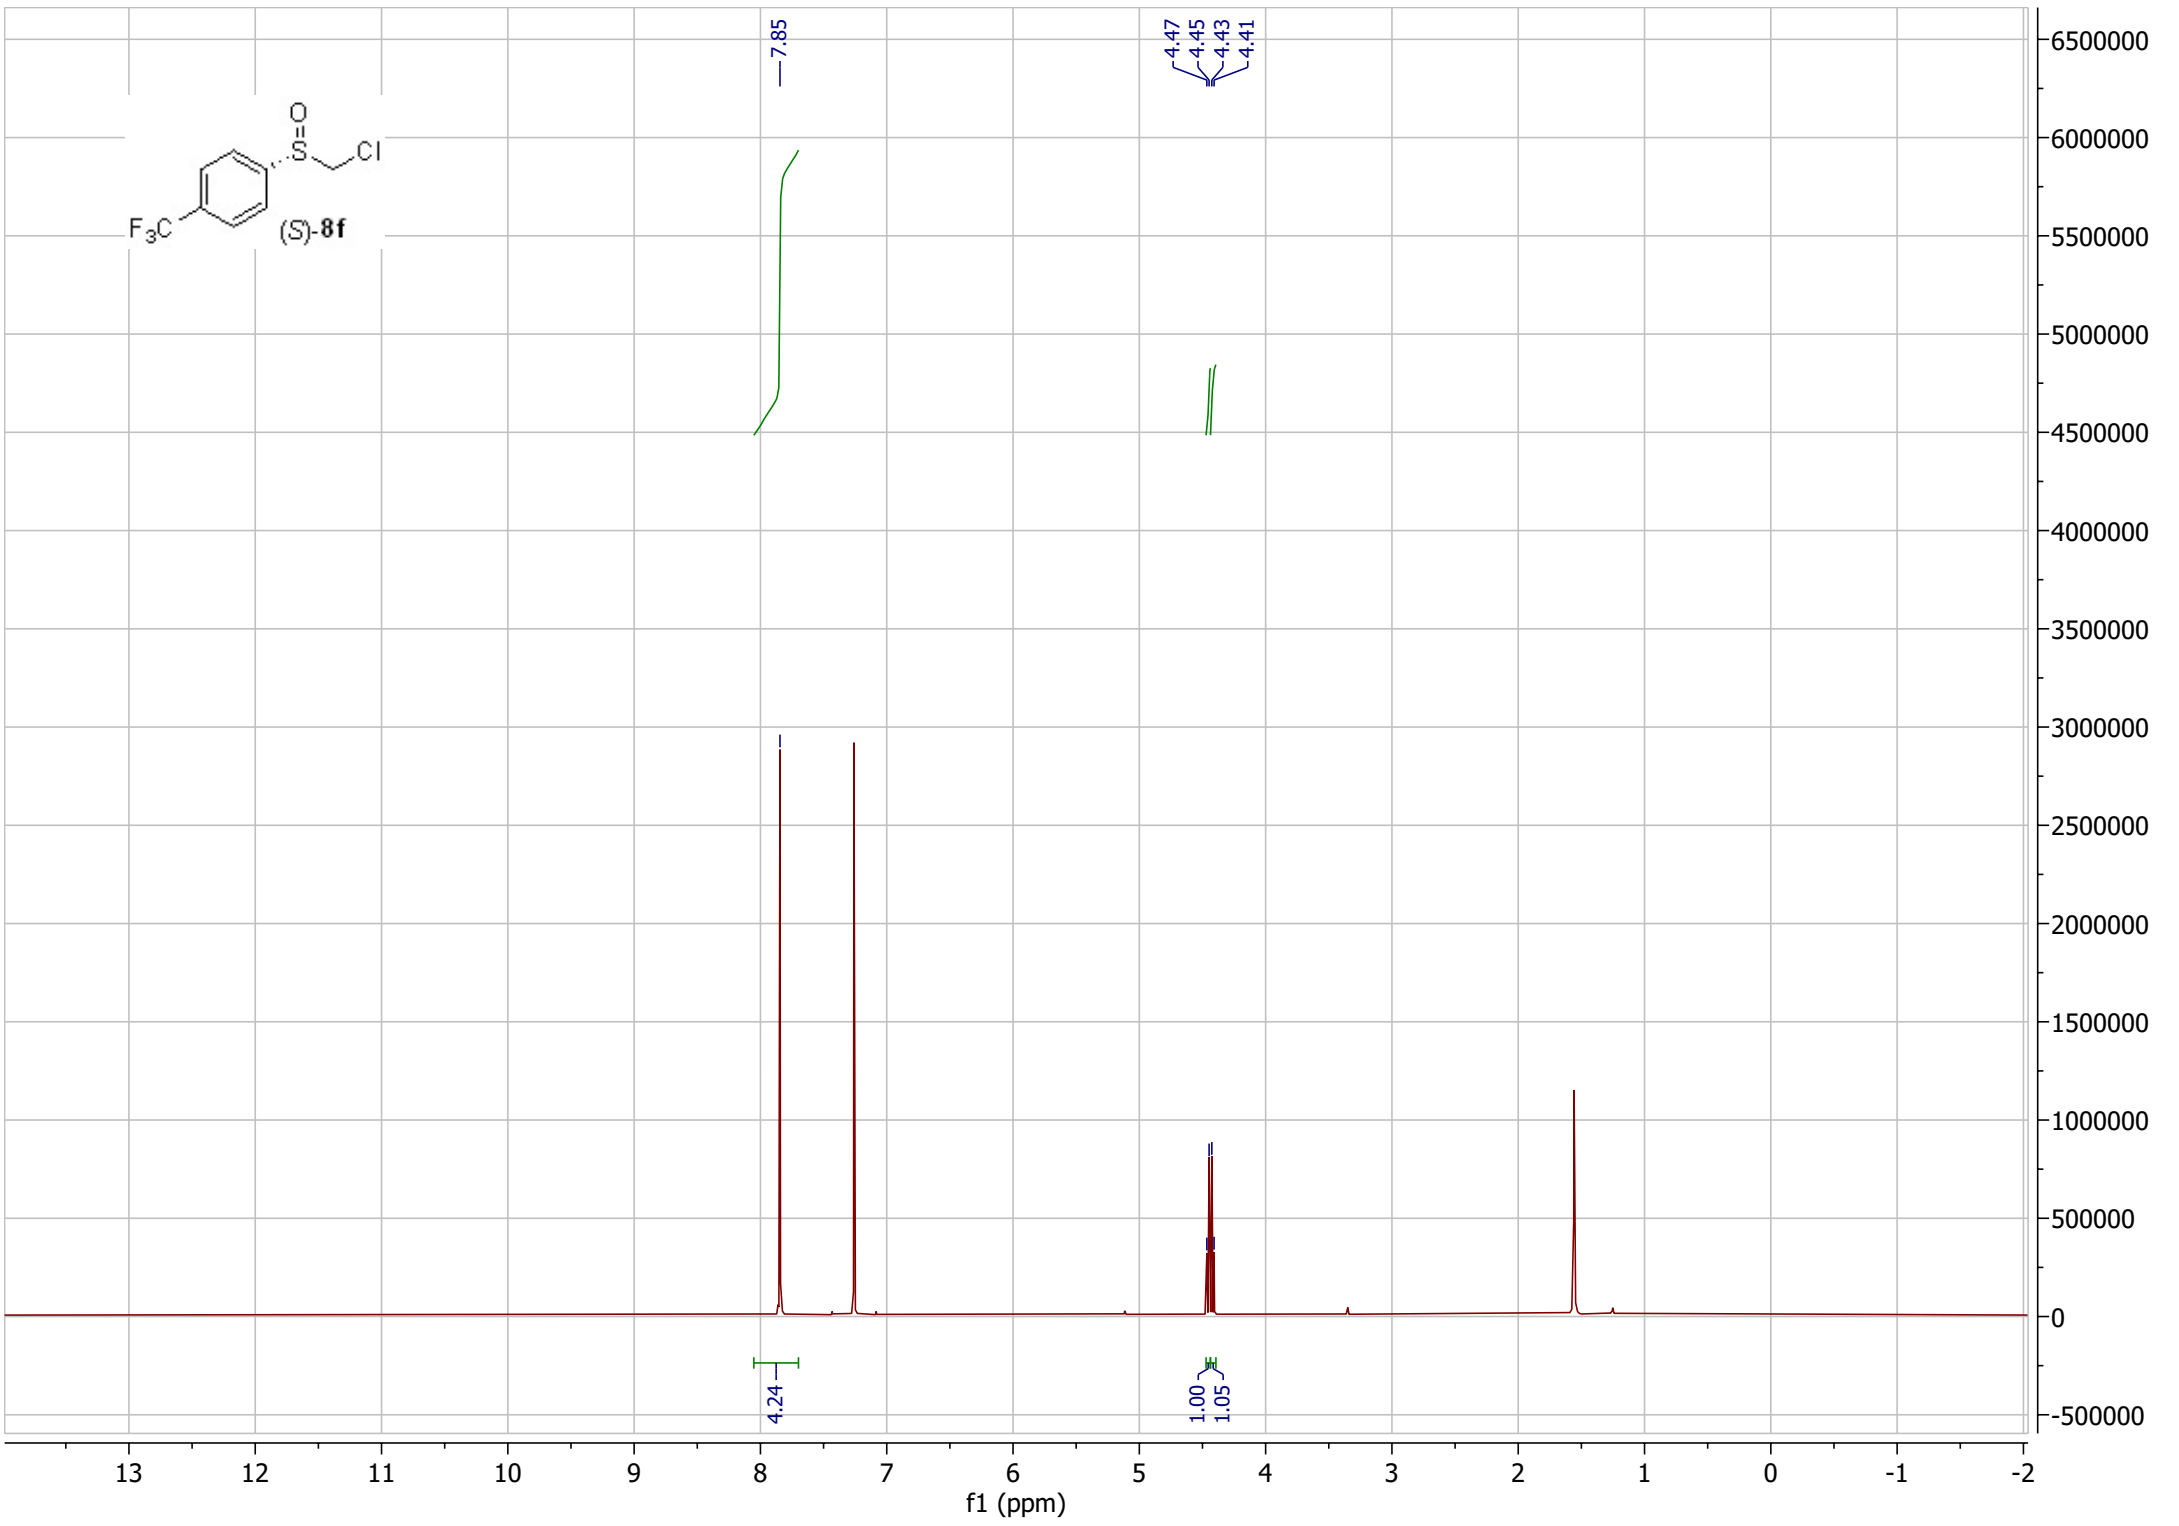

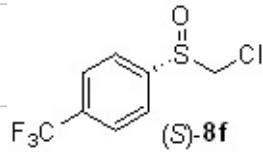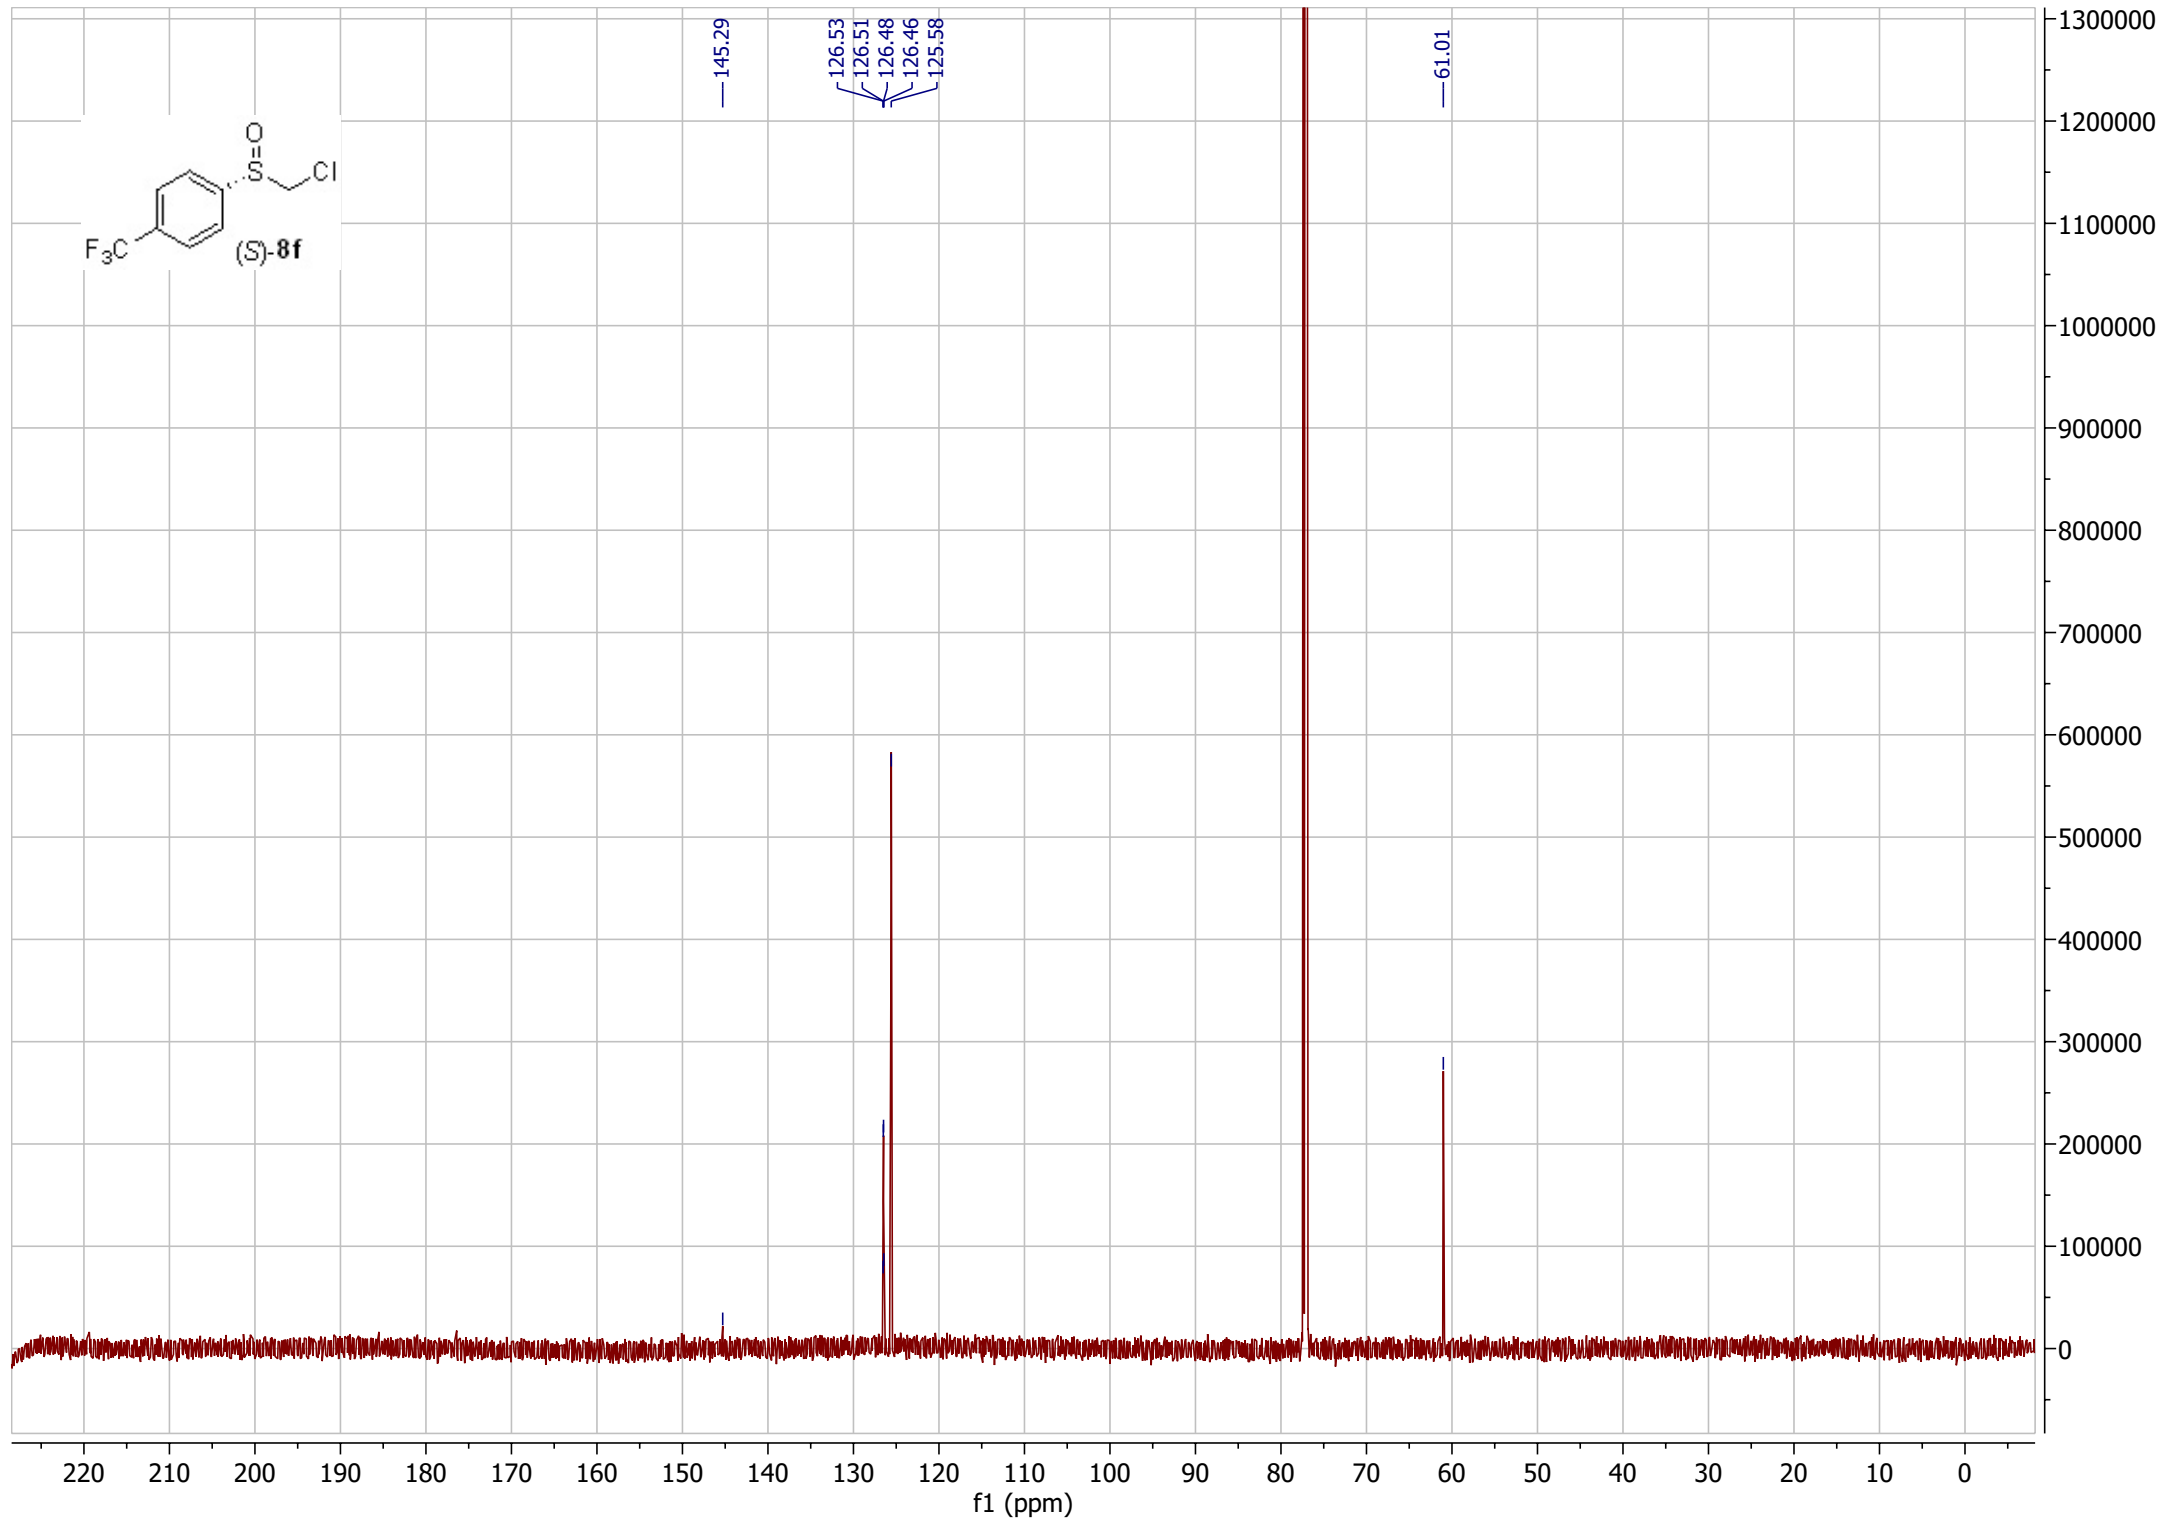



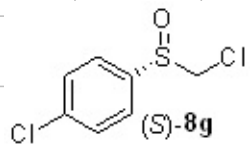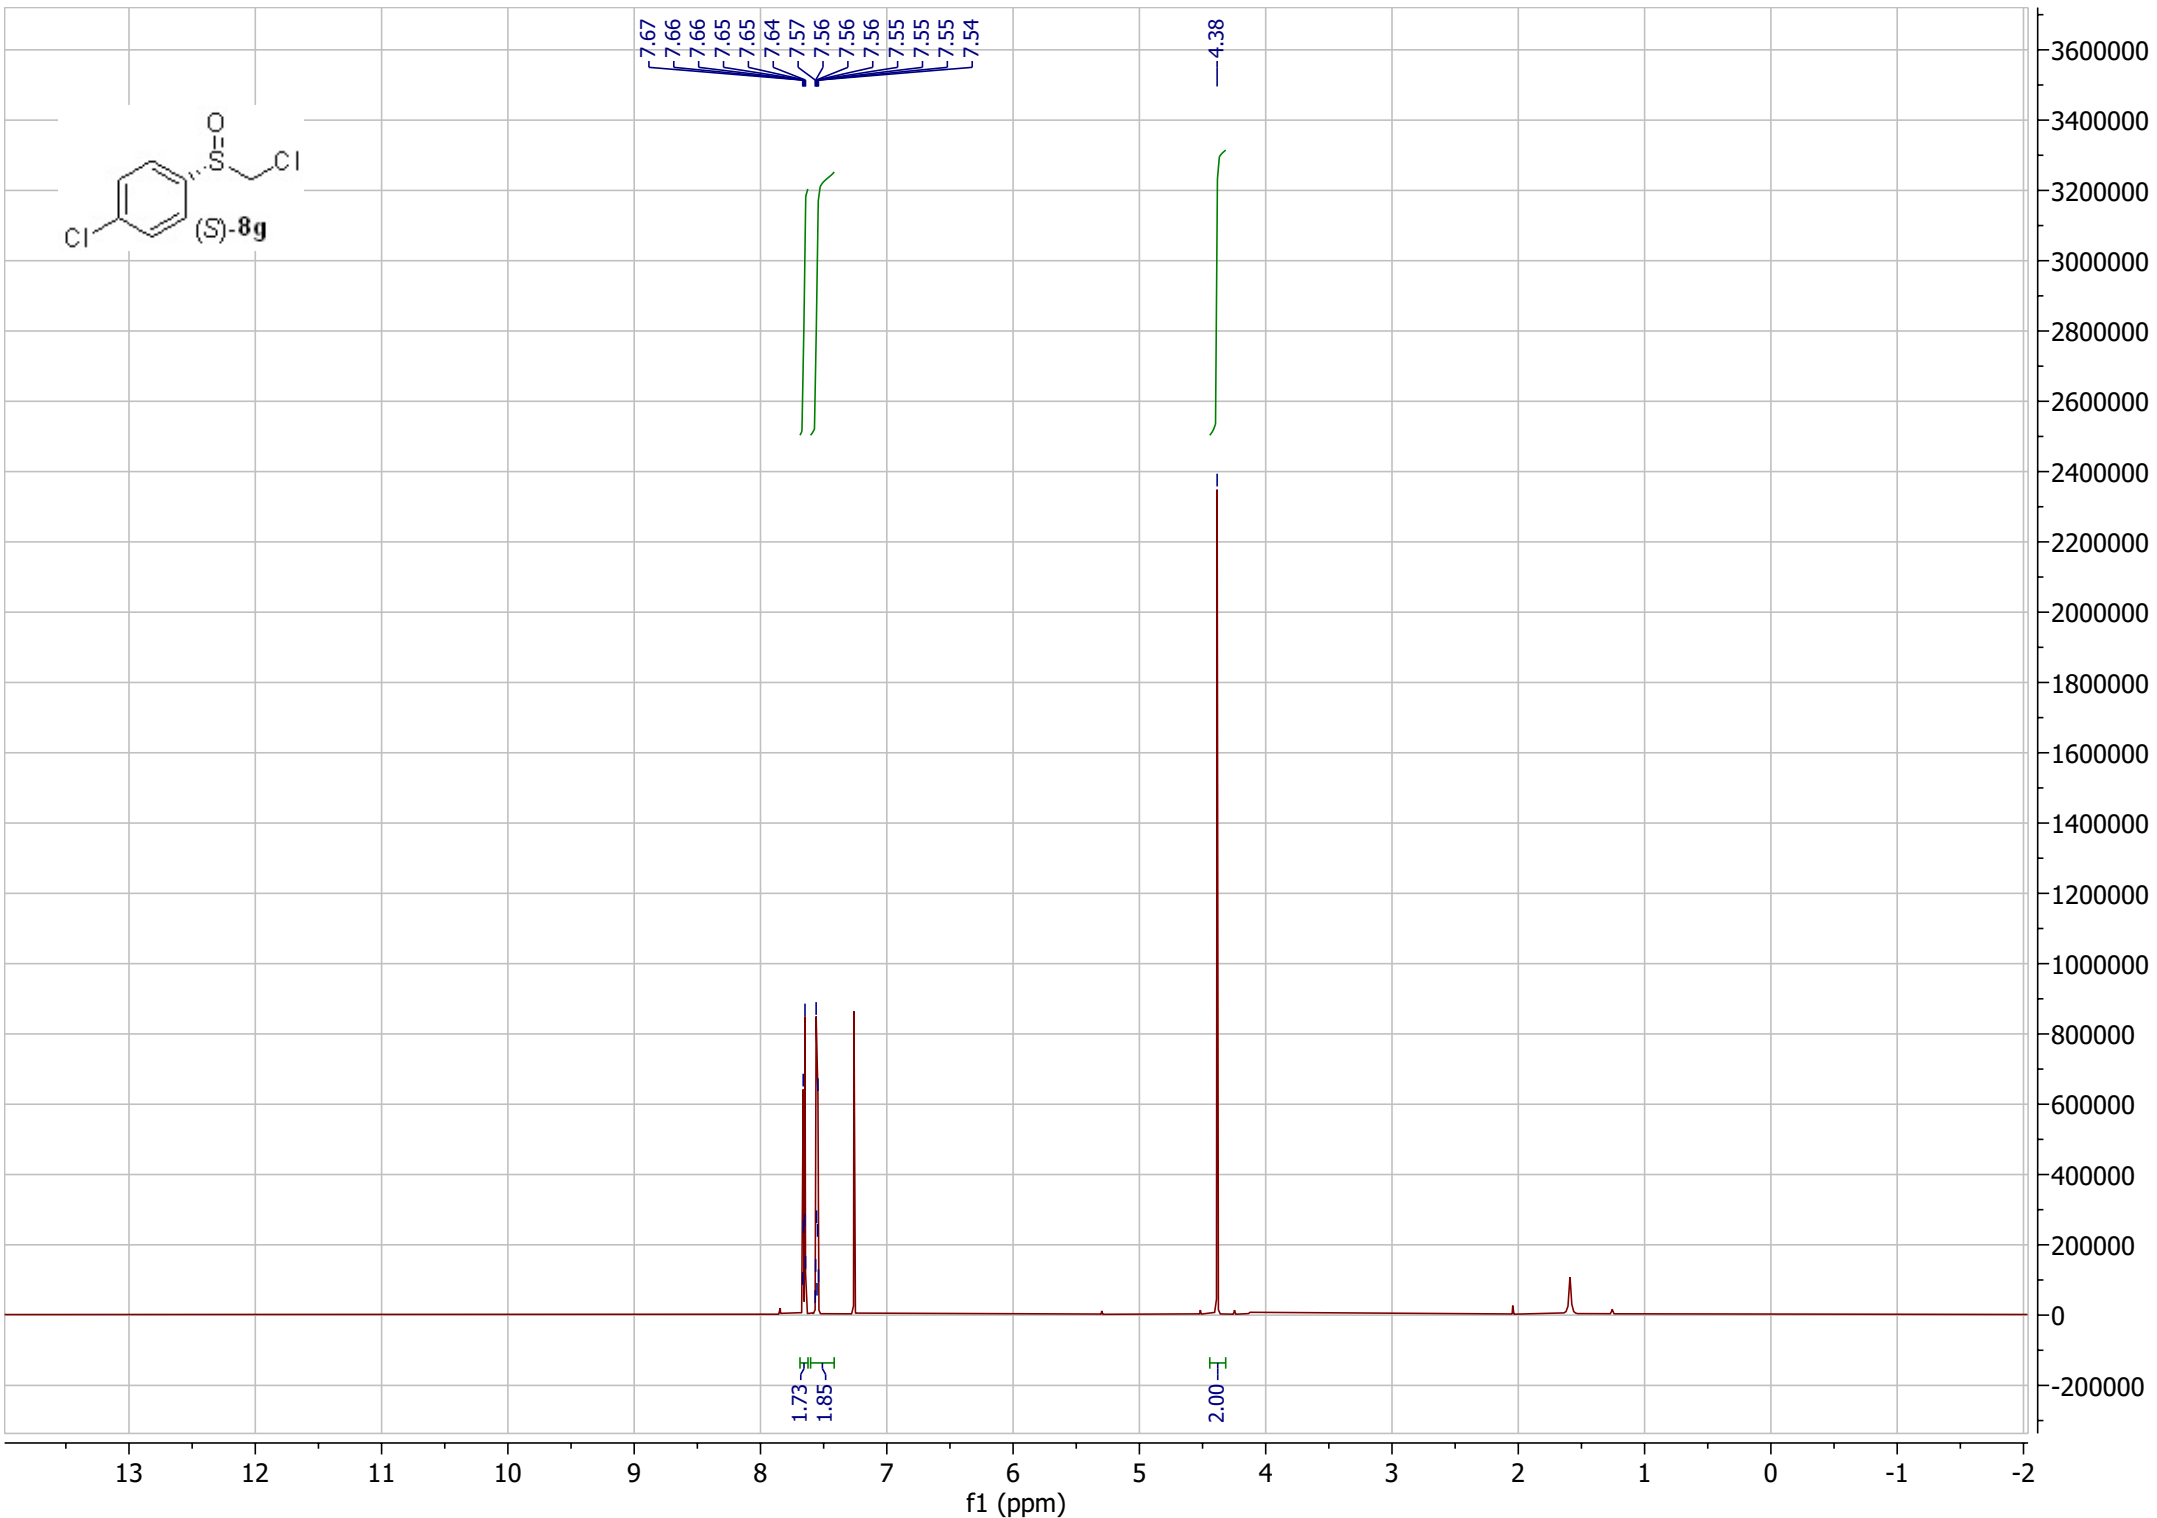

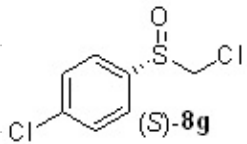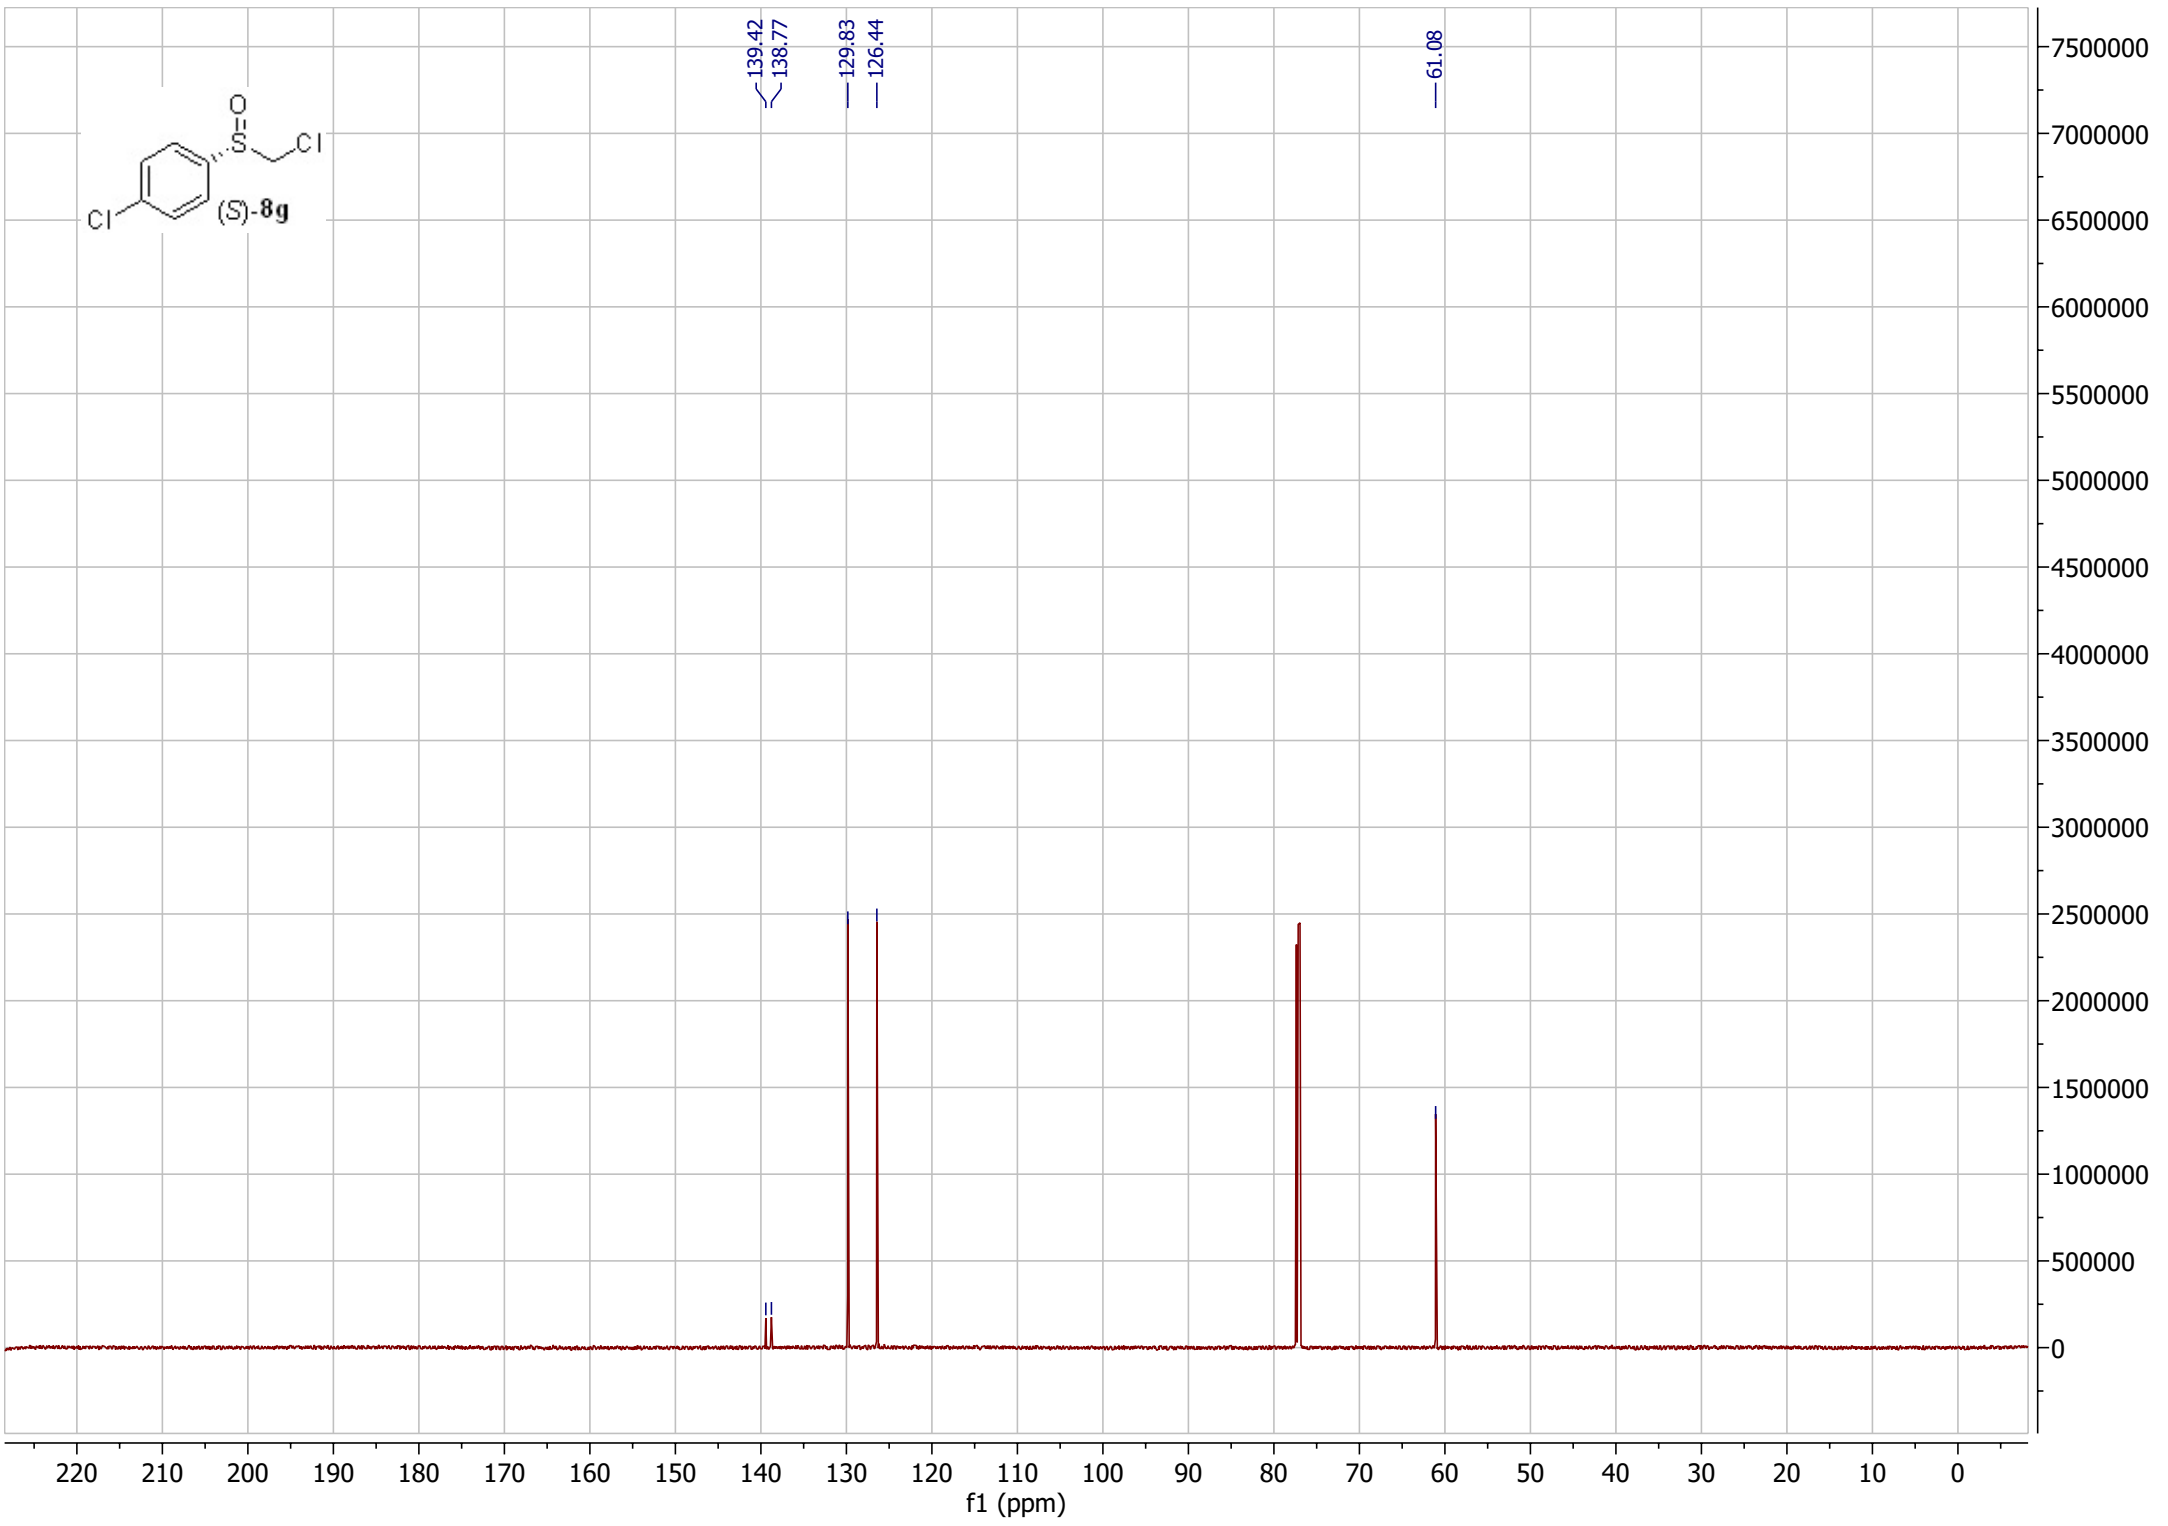

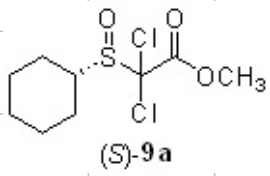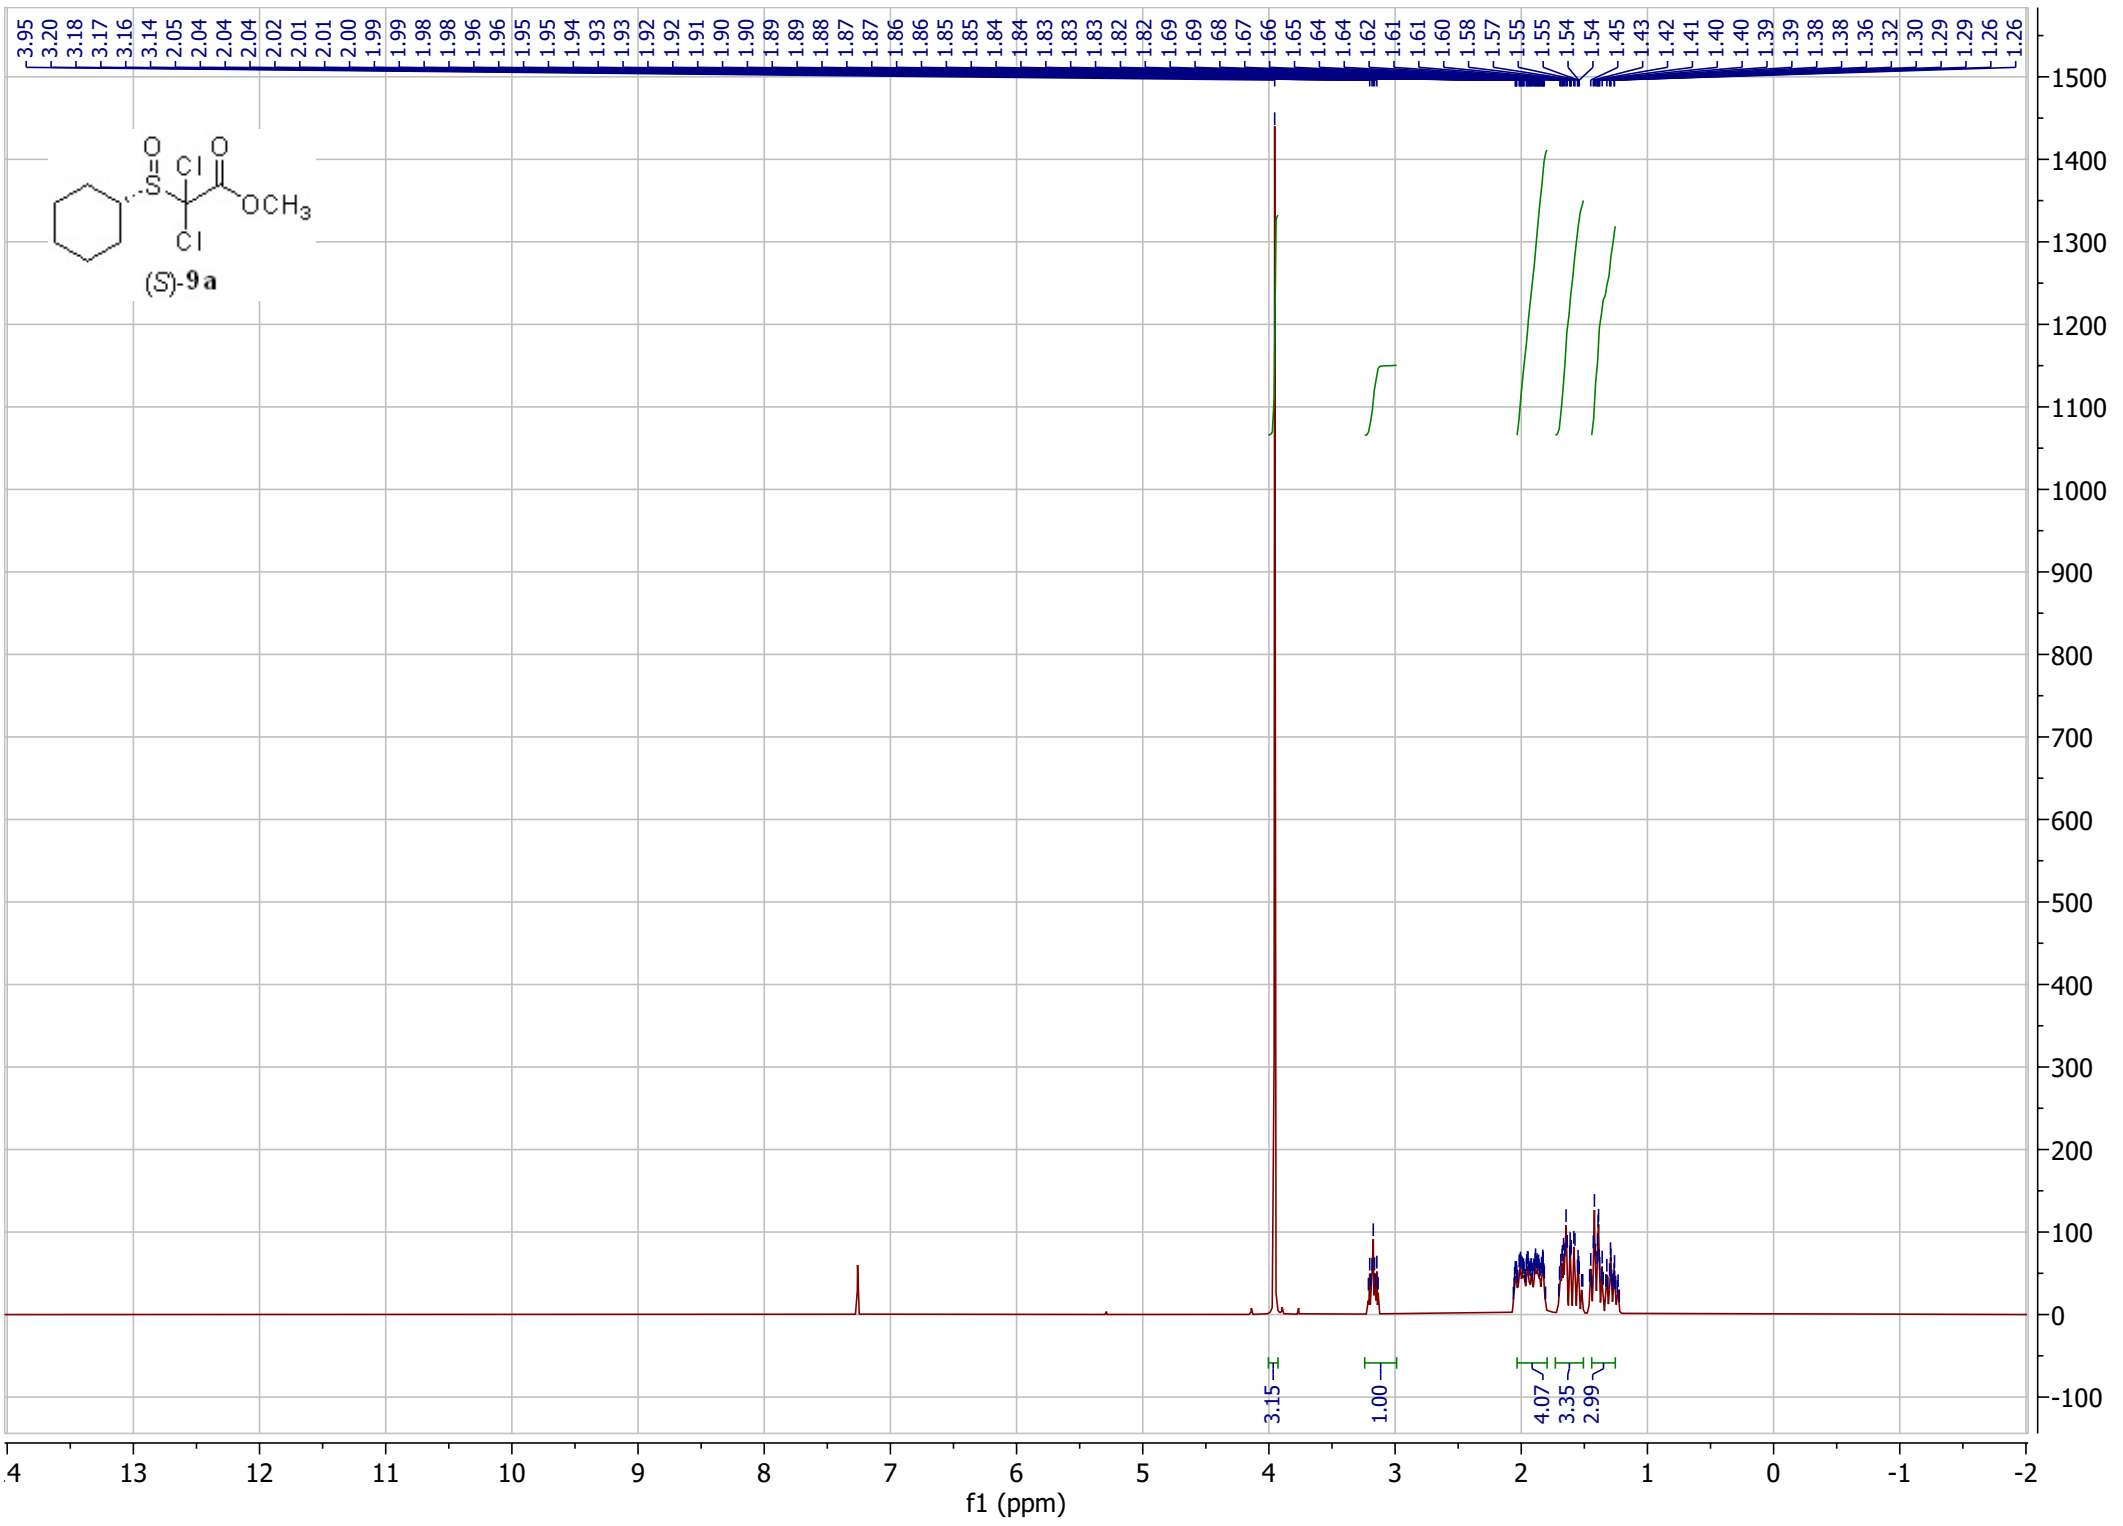

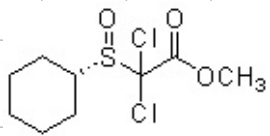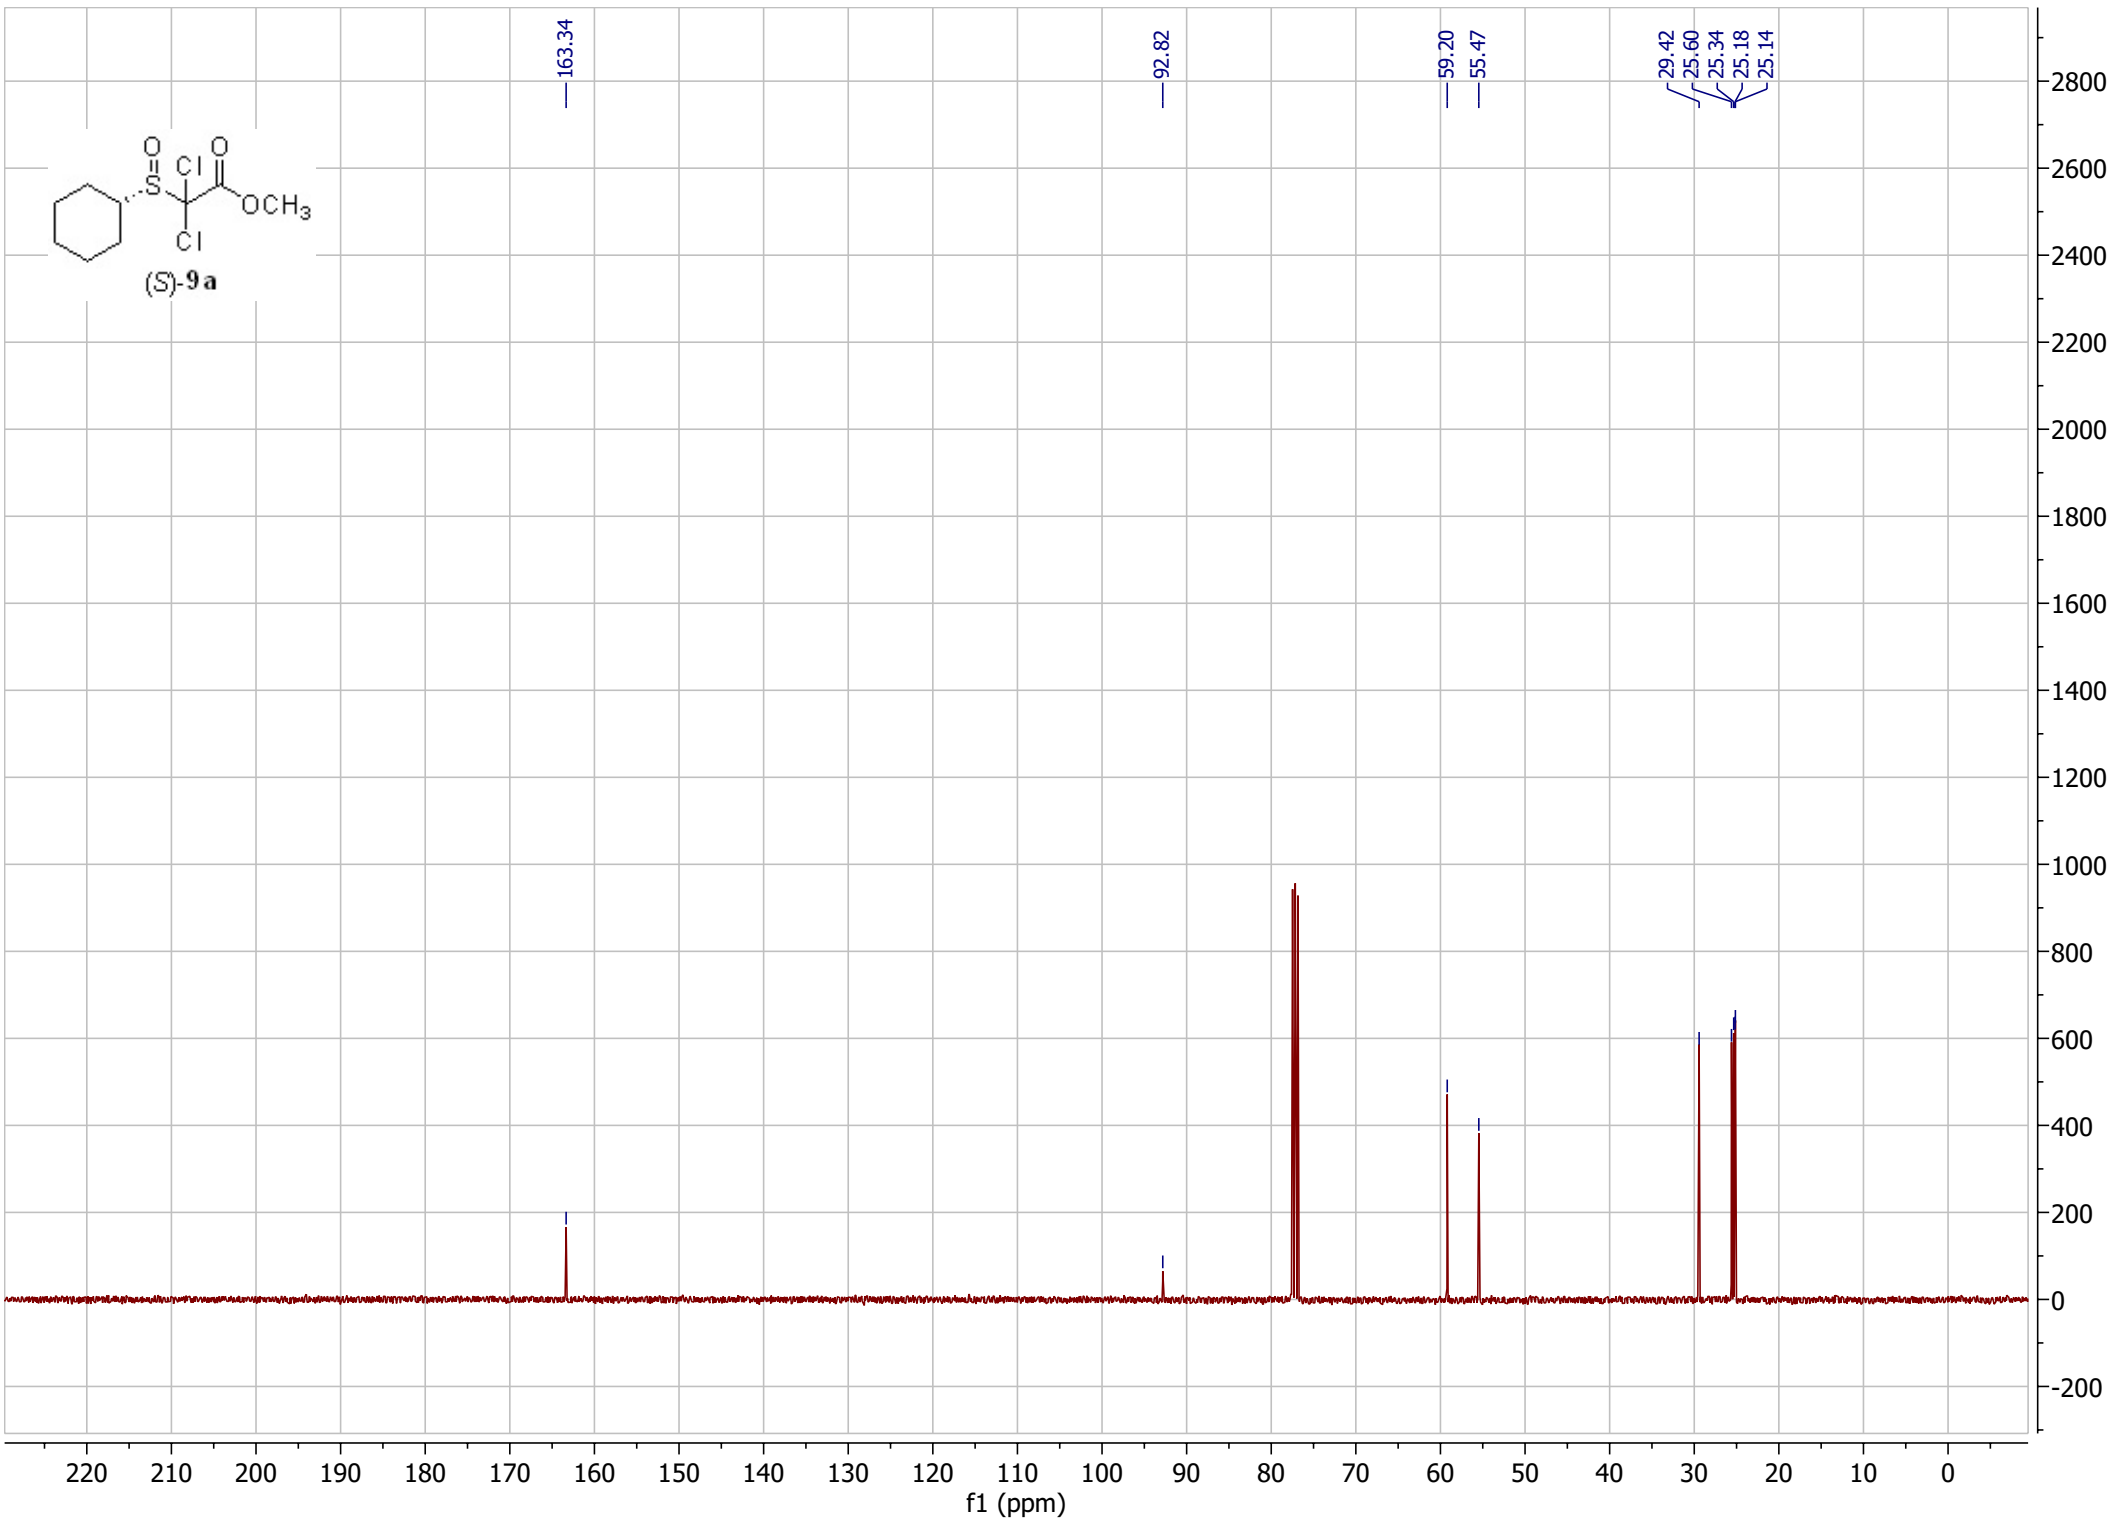

PROTON\_01

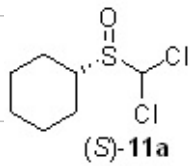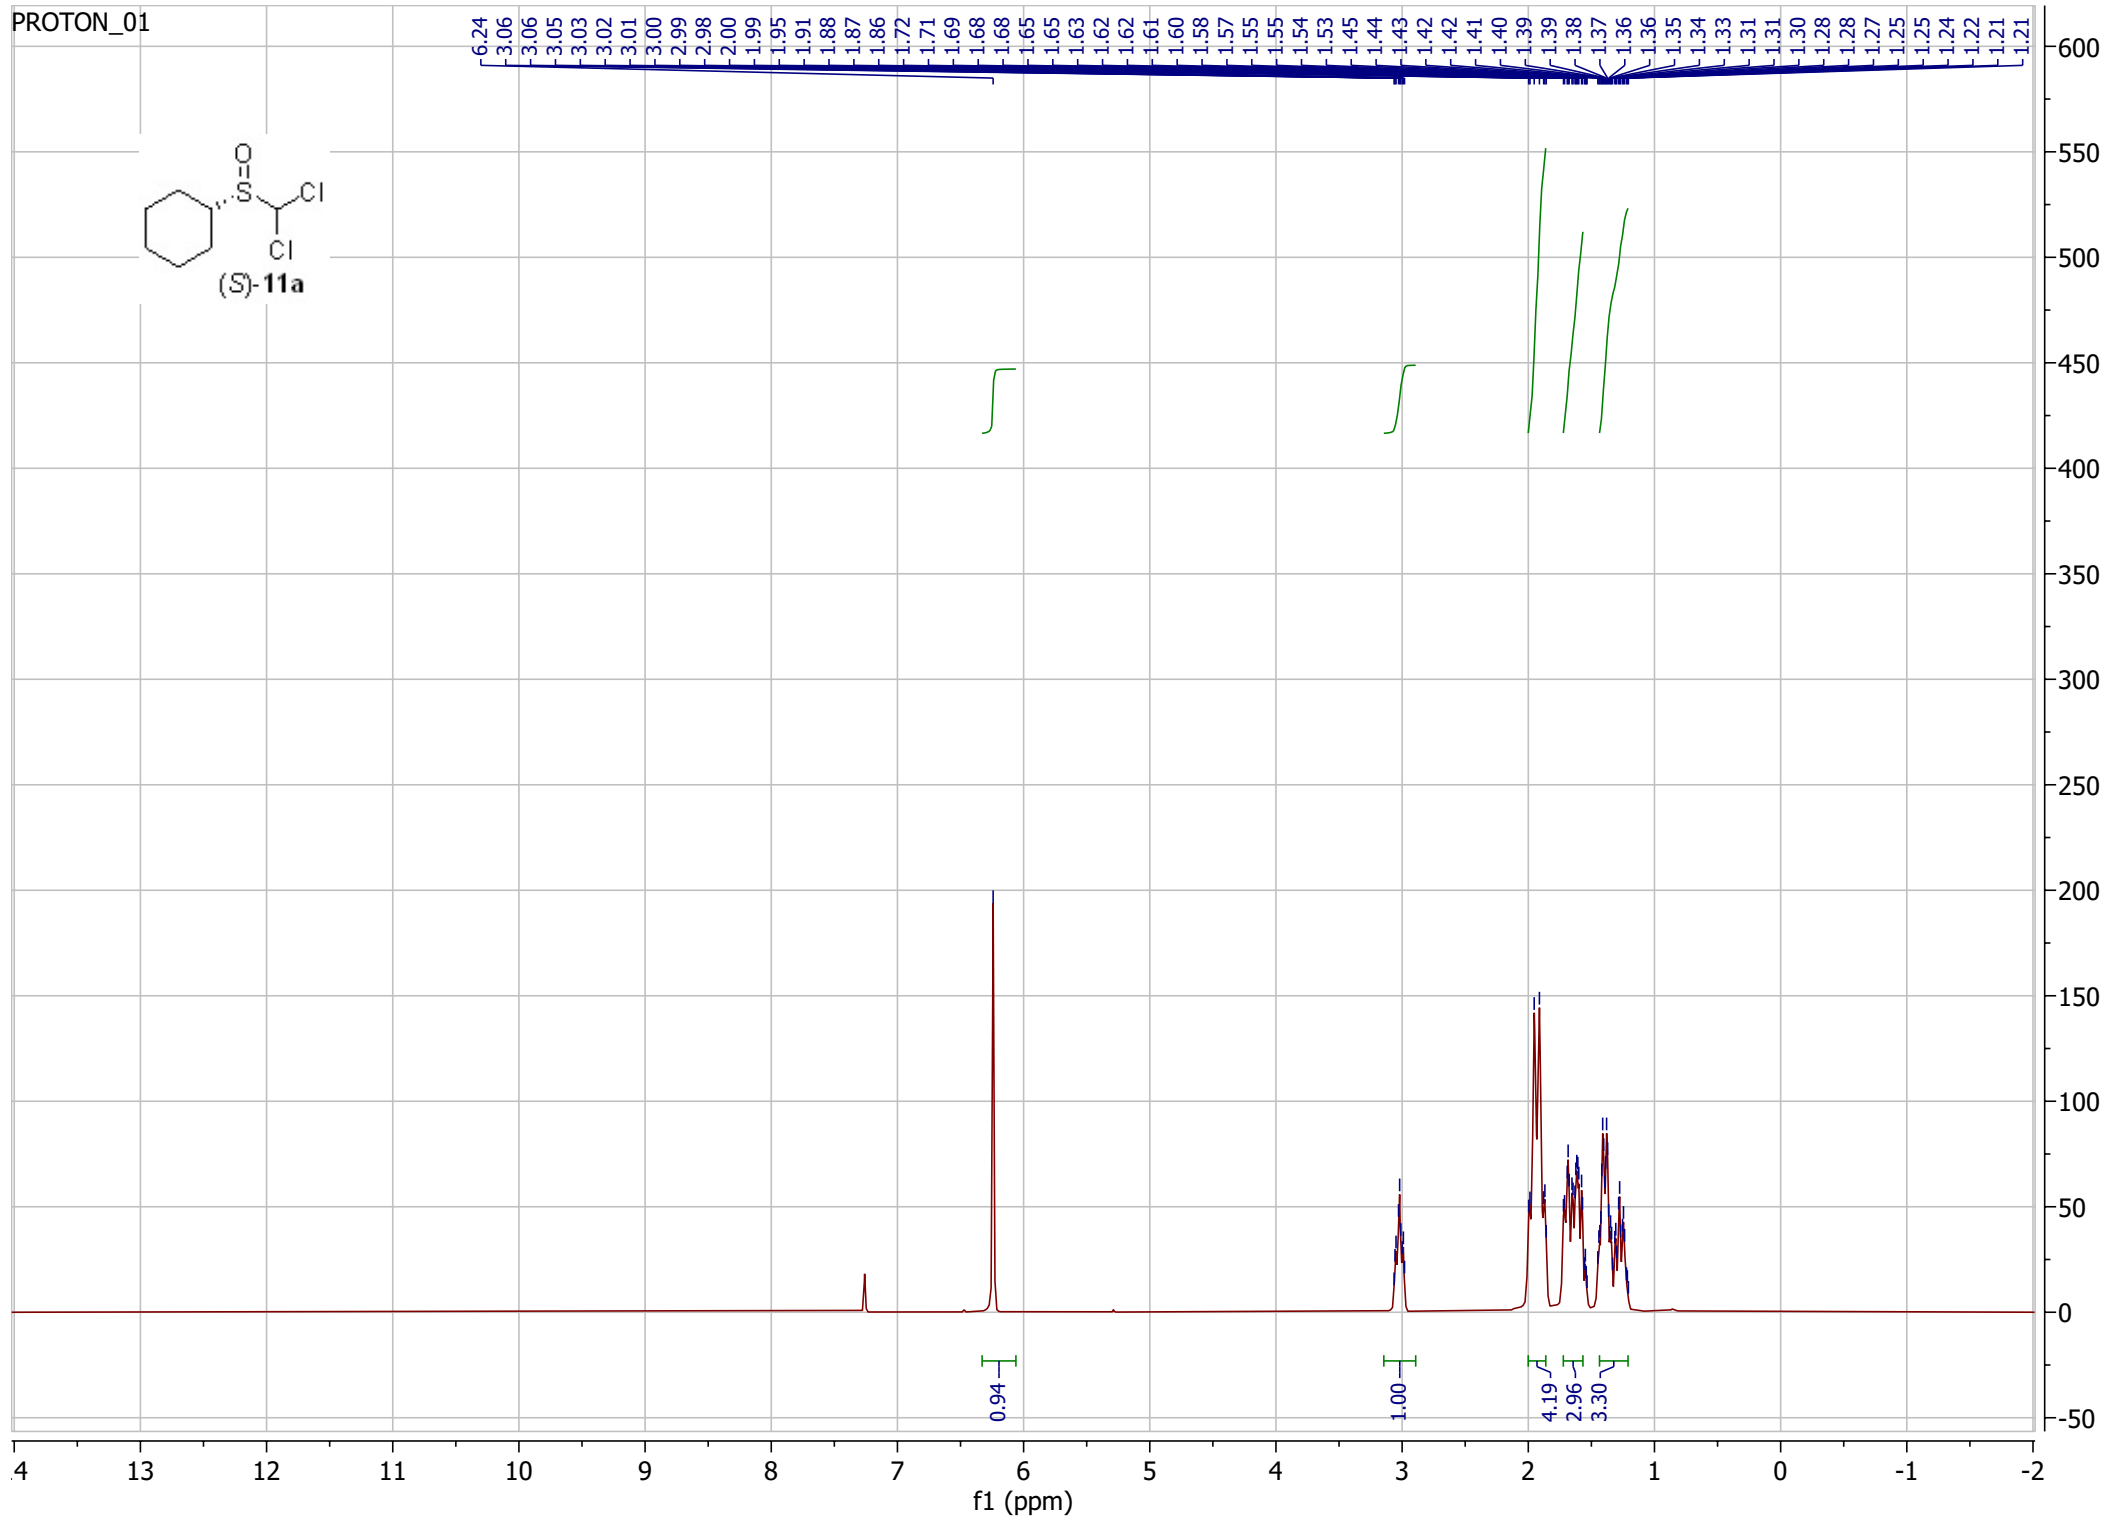

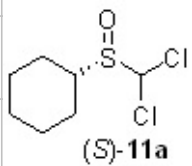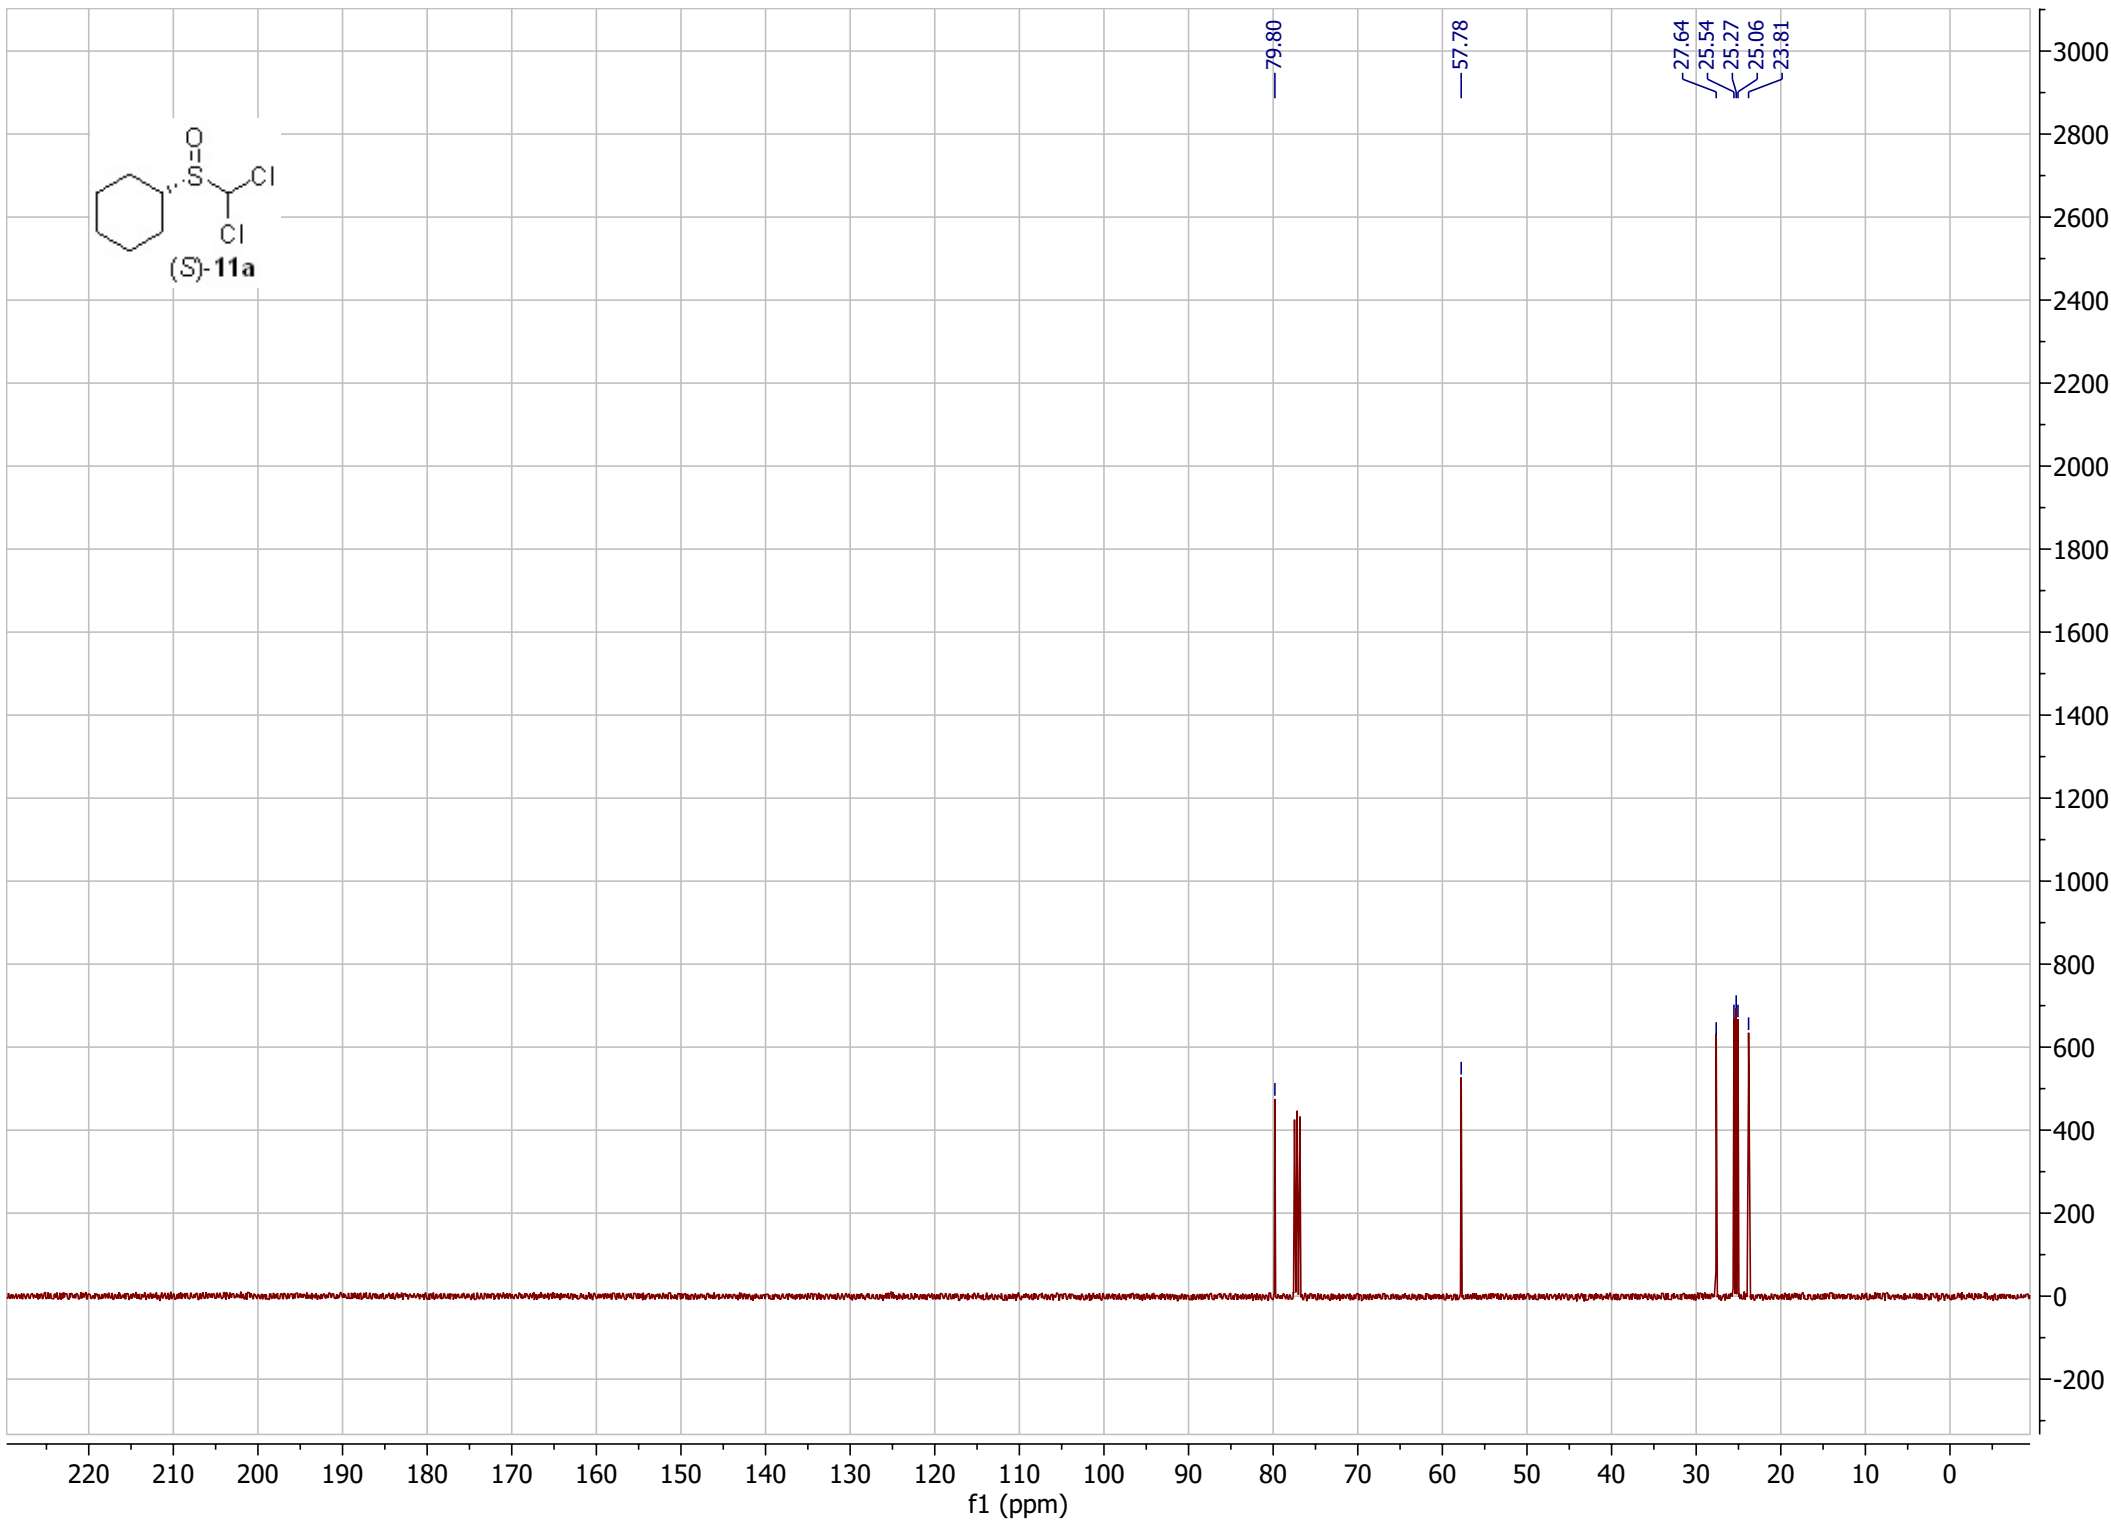

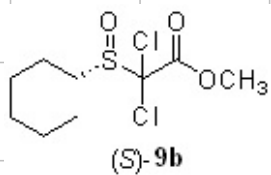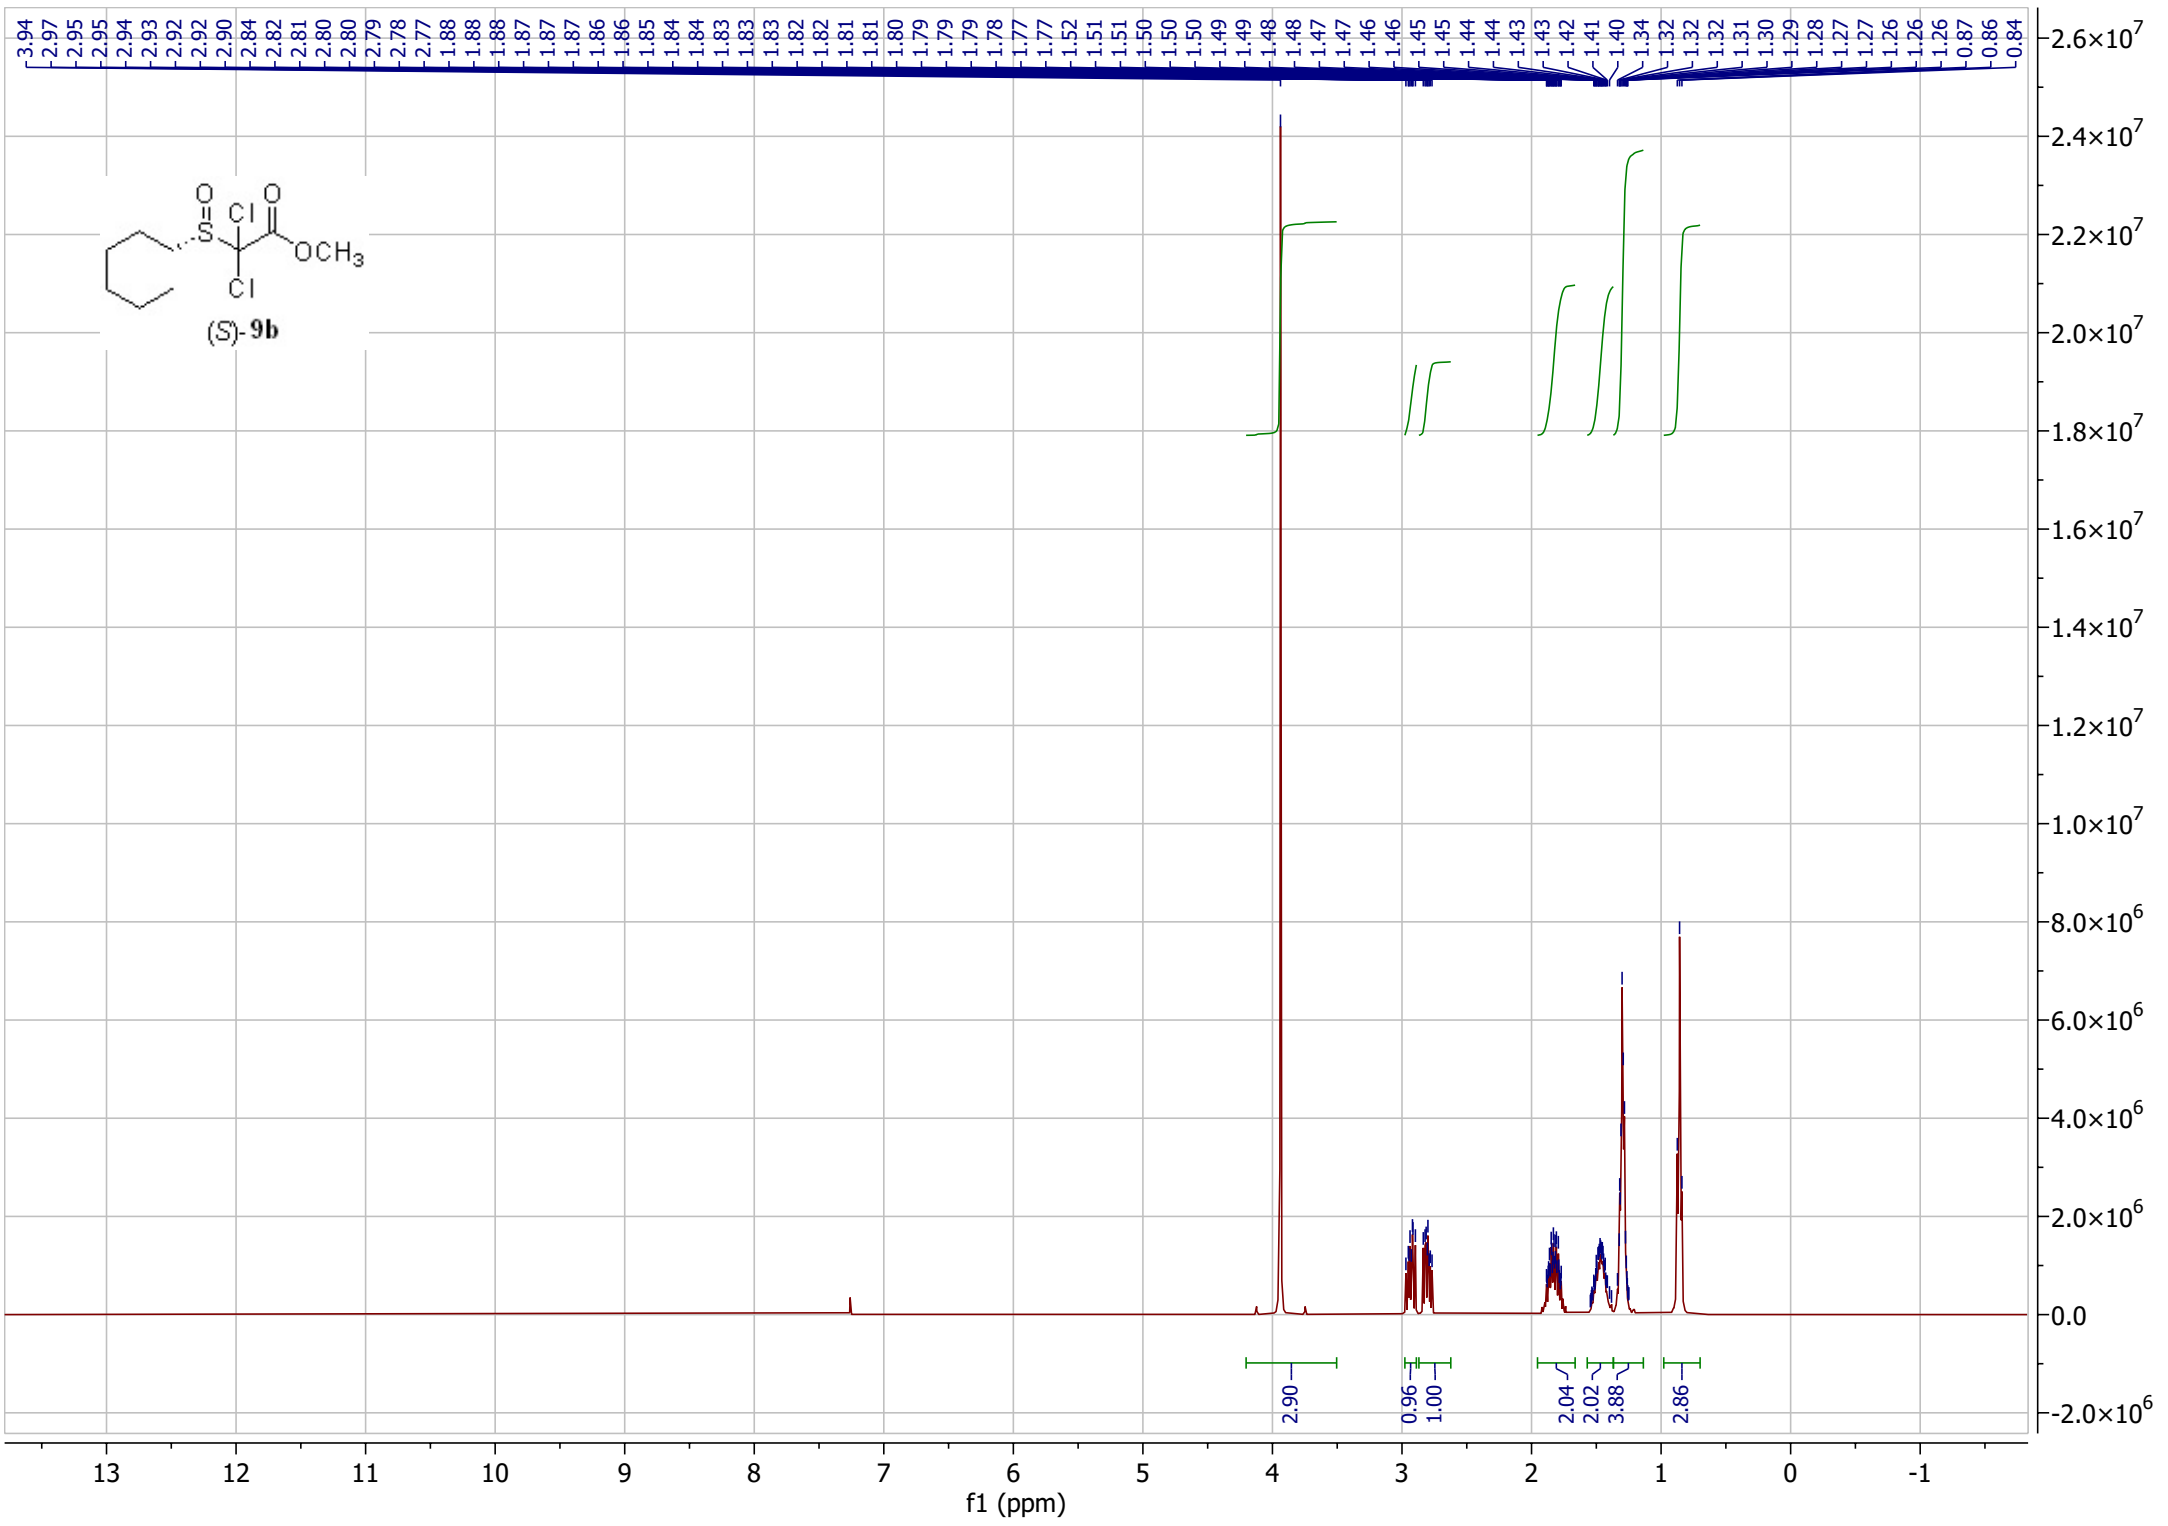

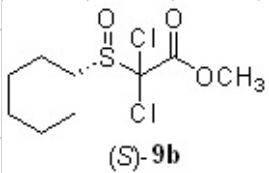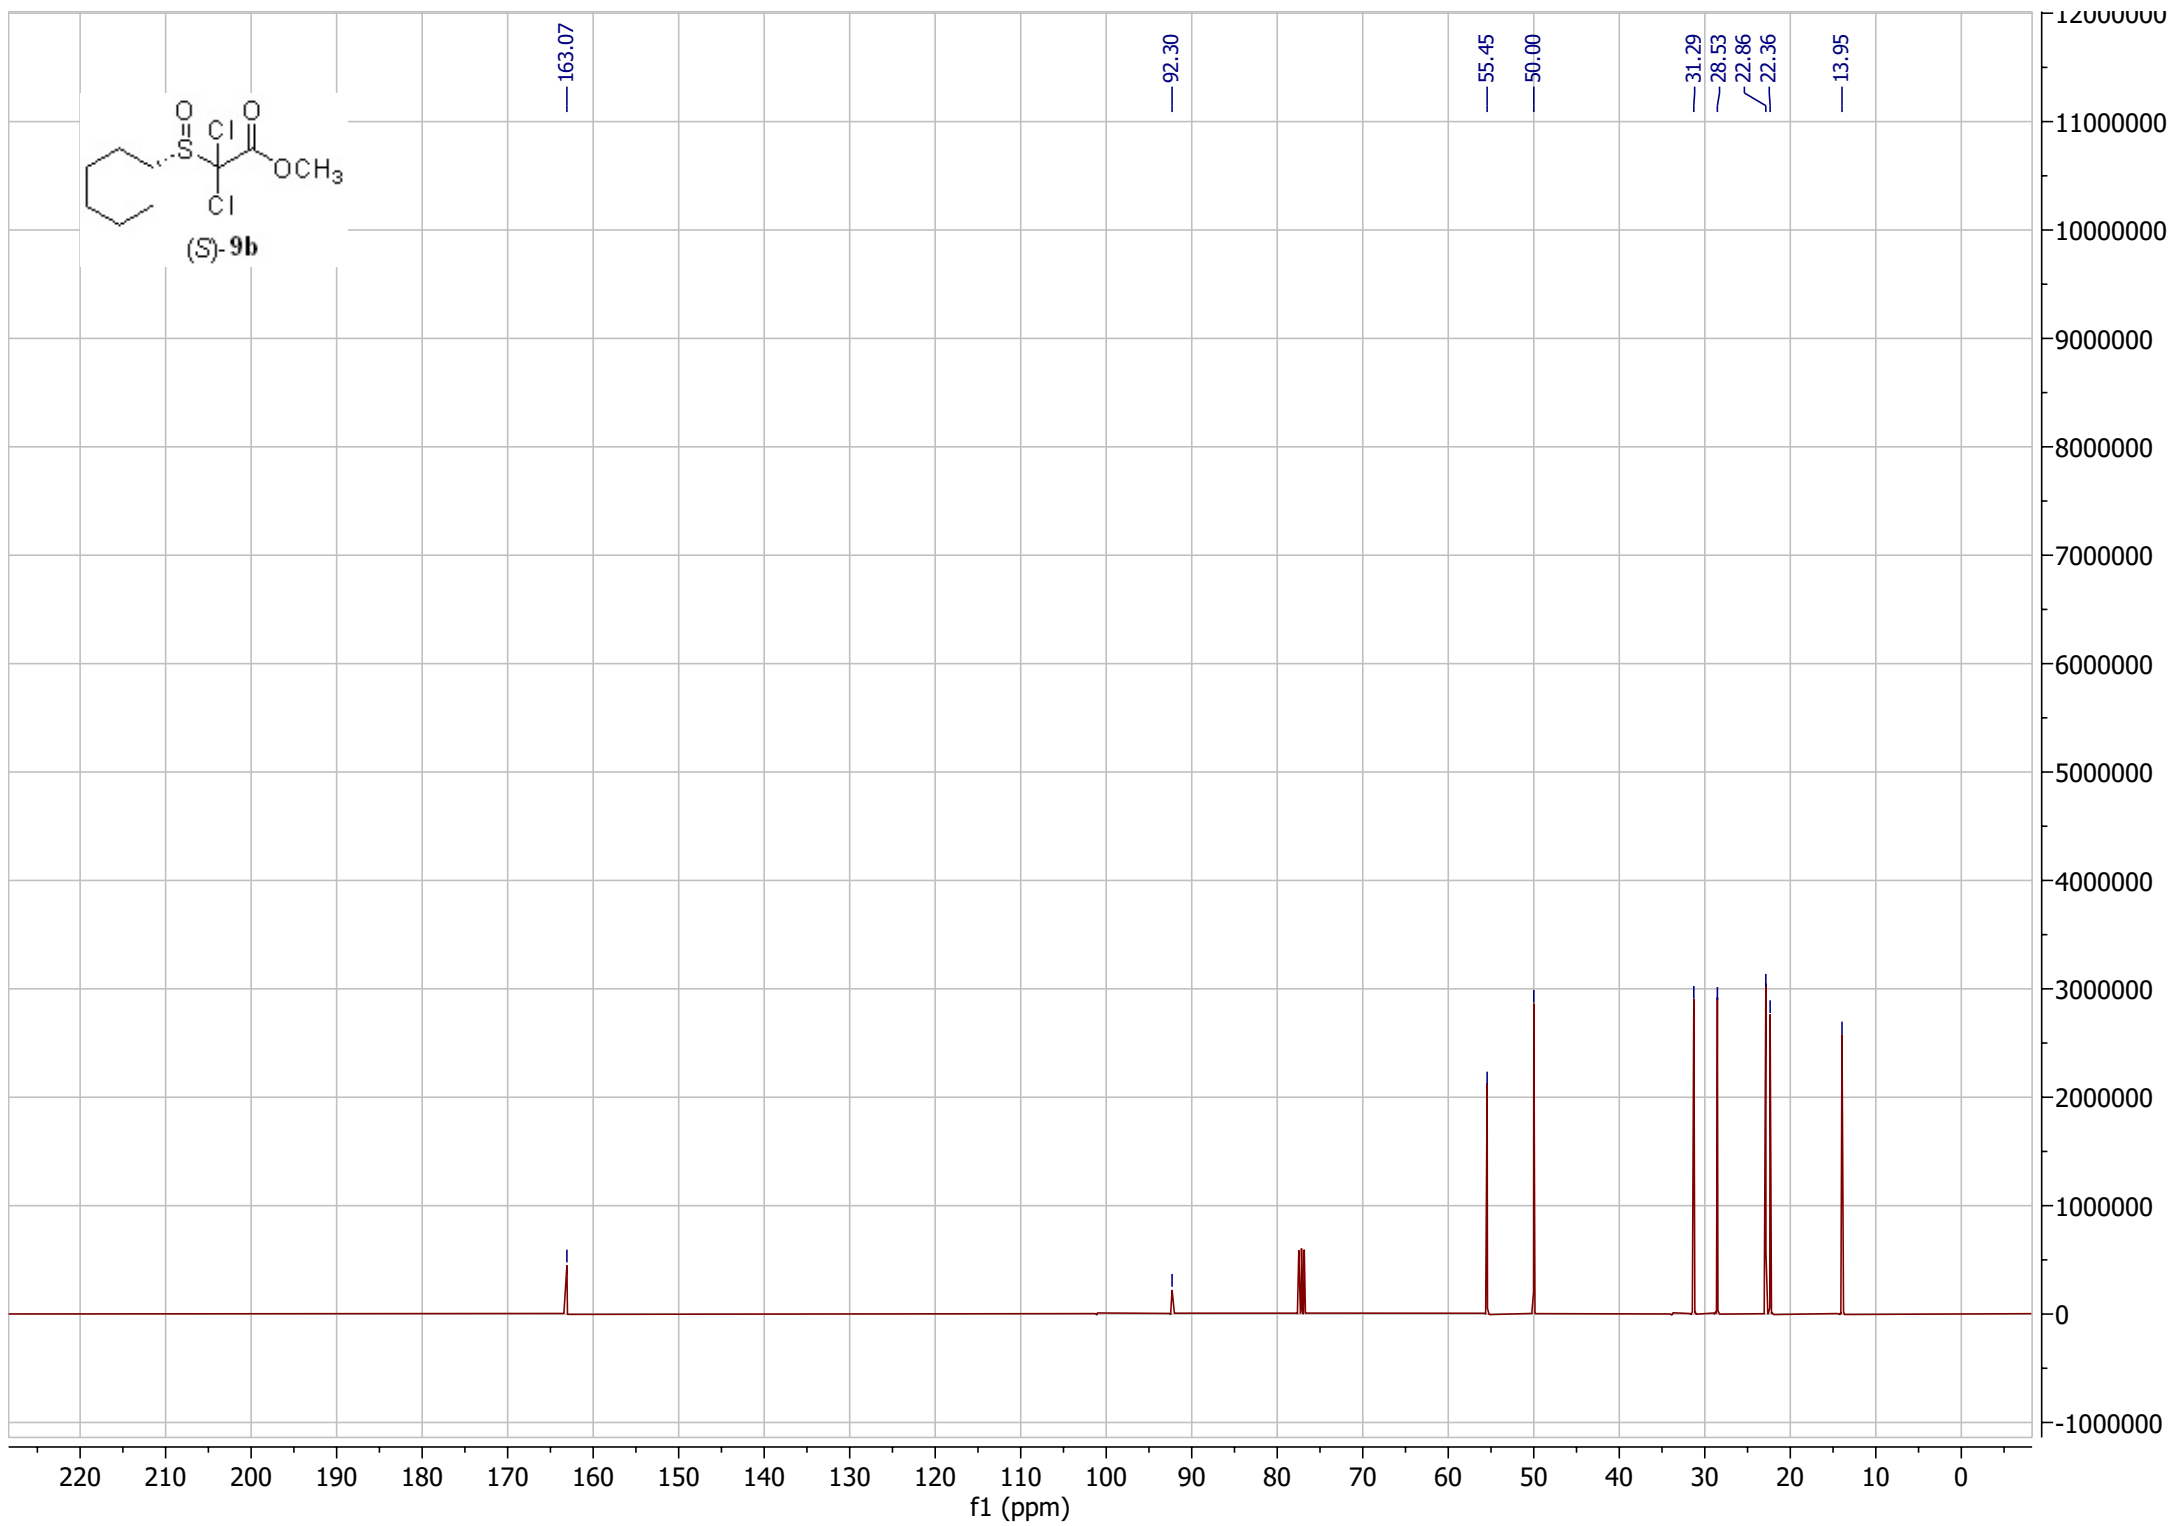



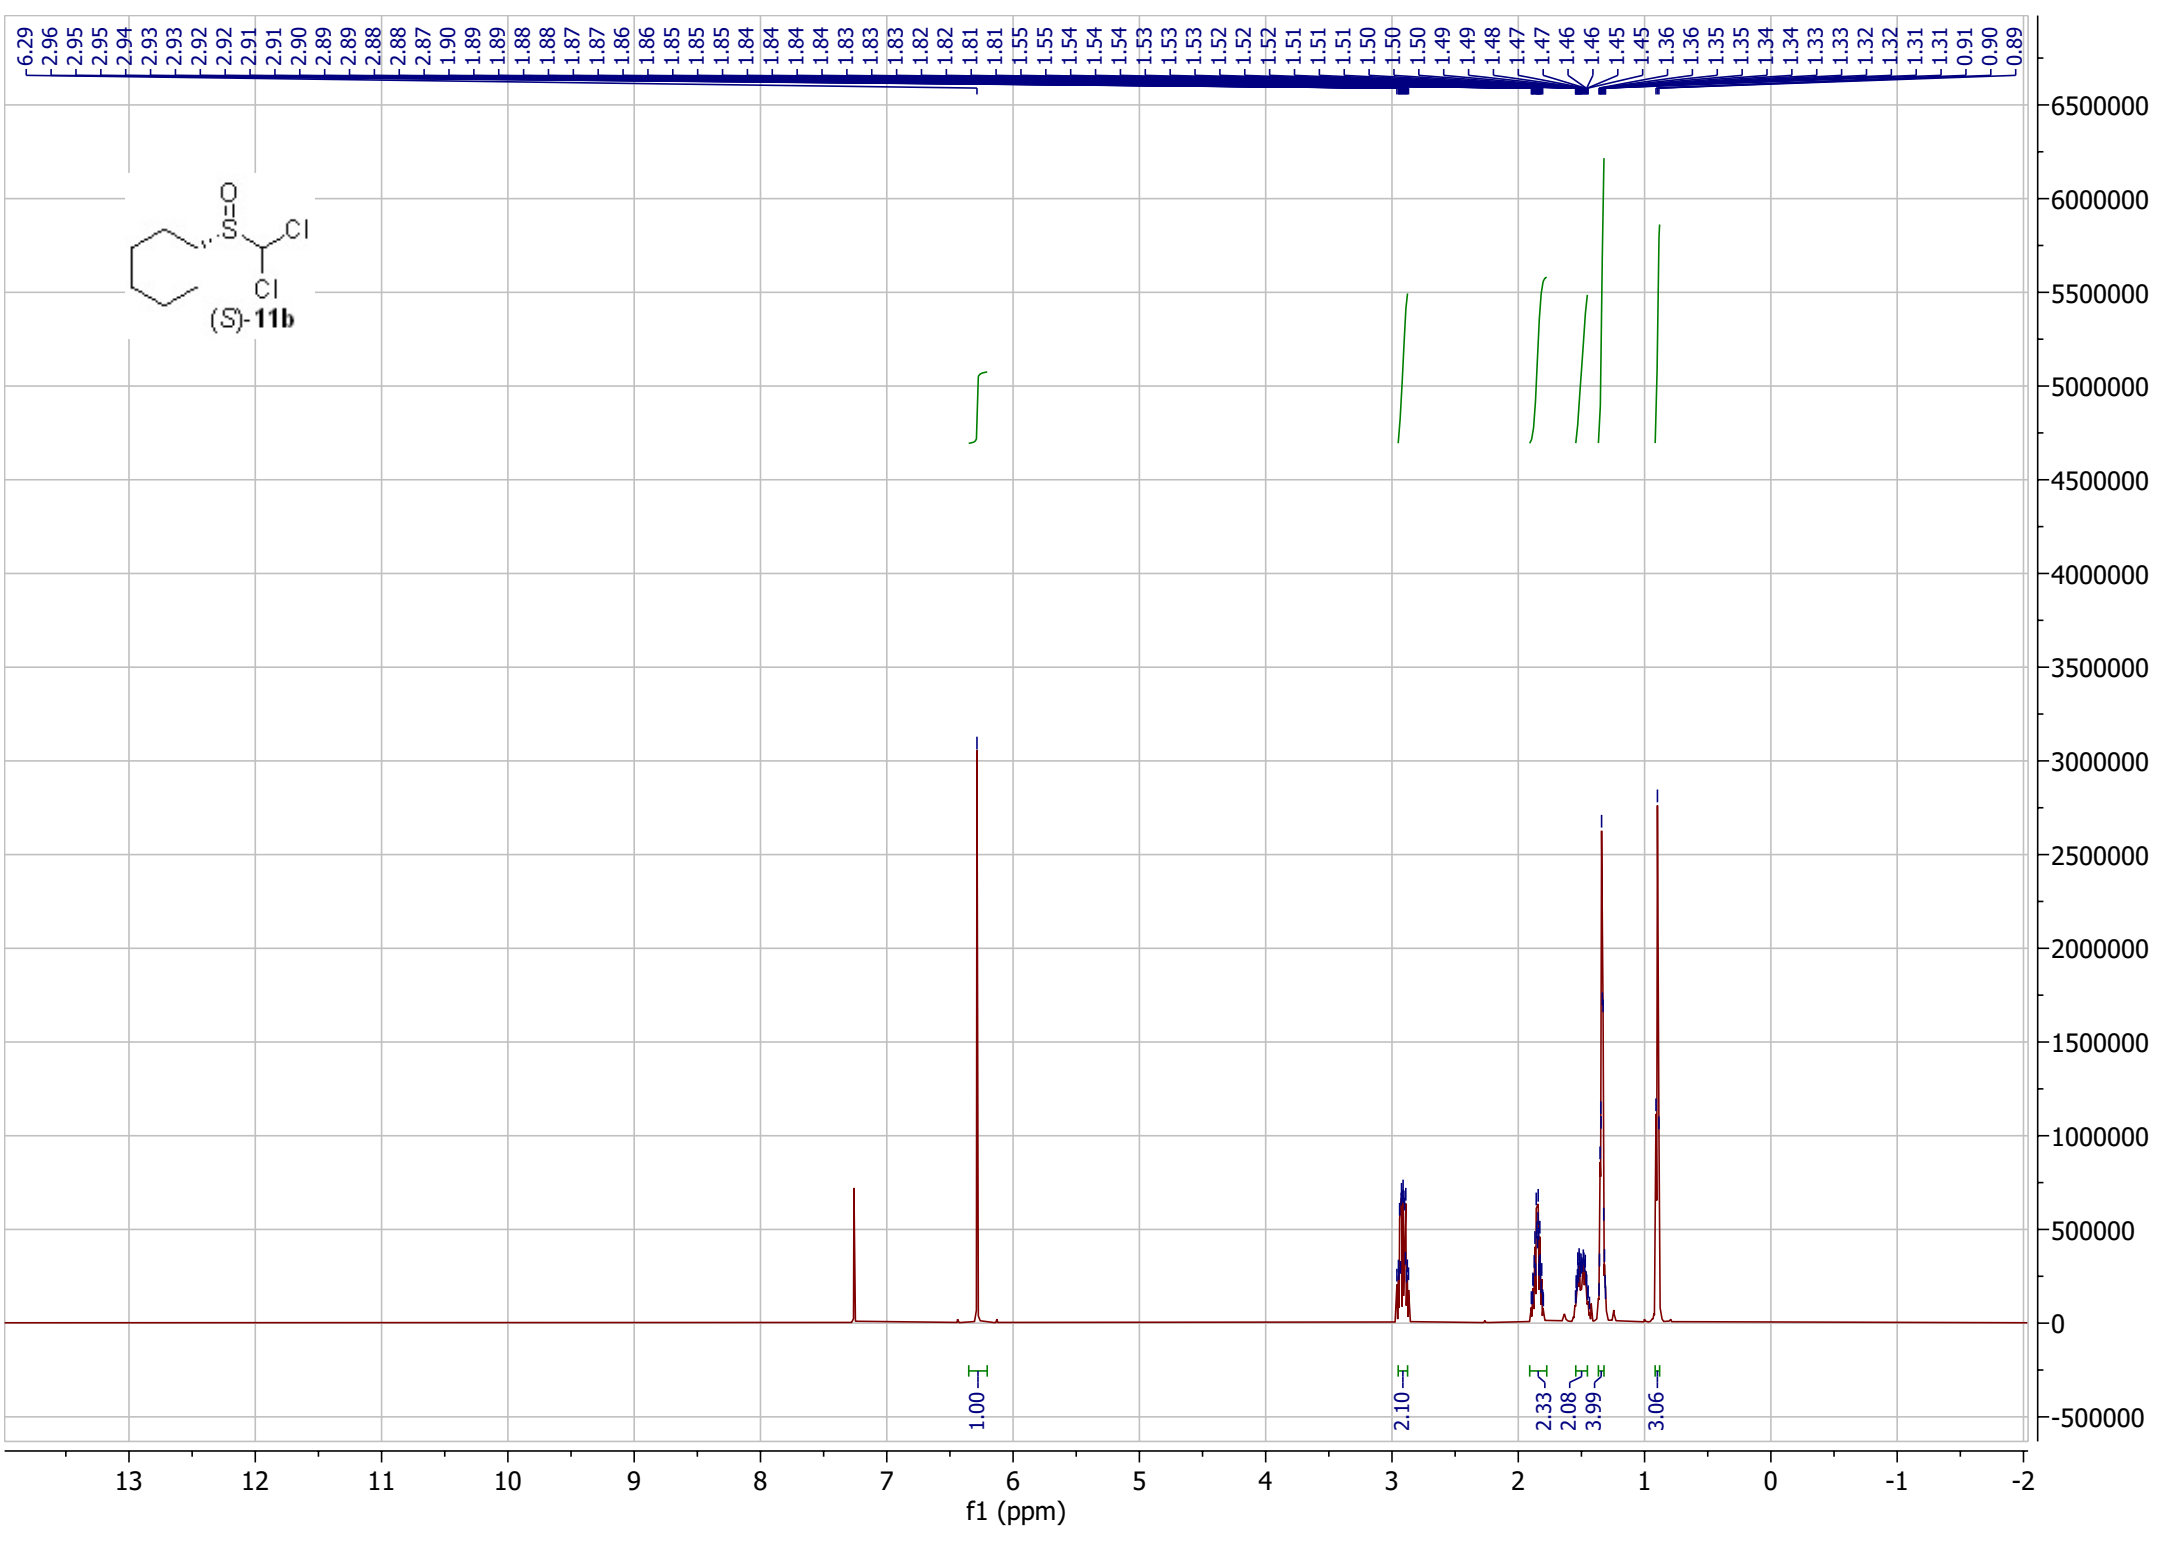

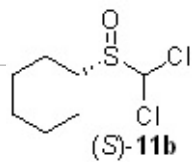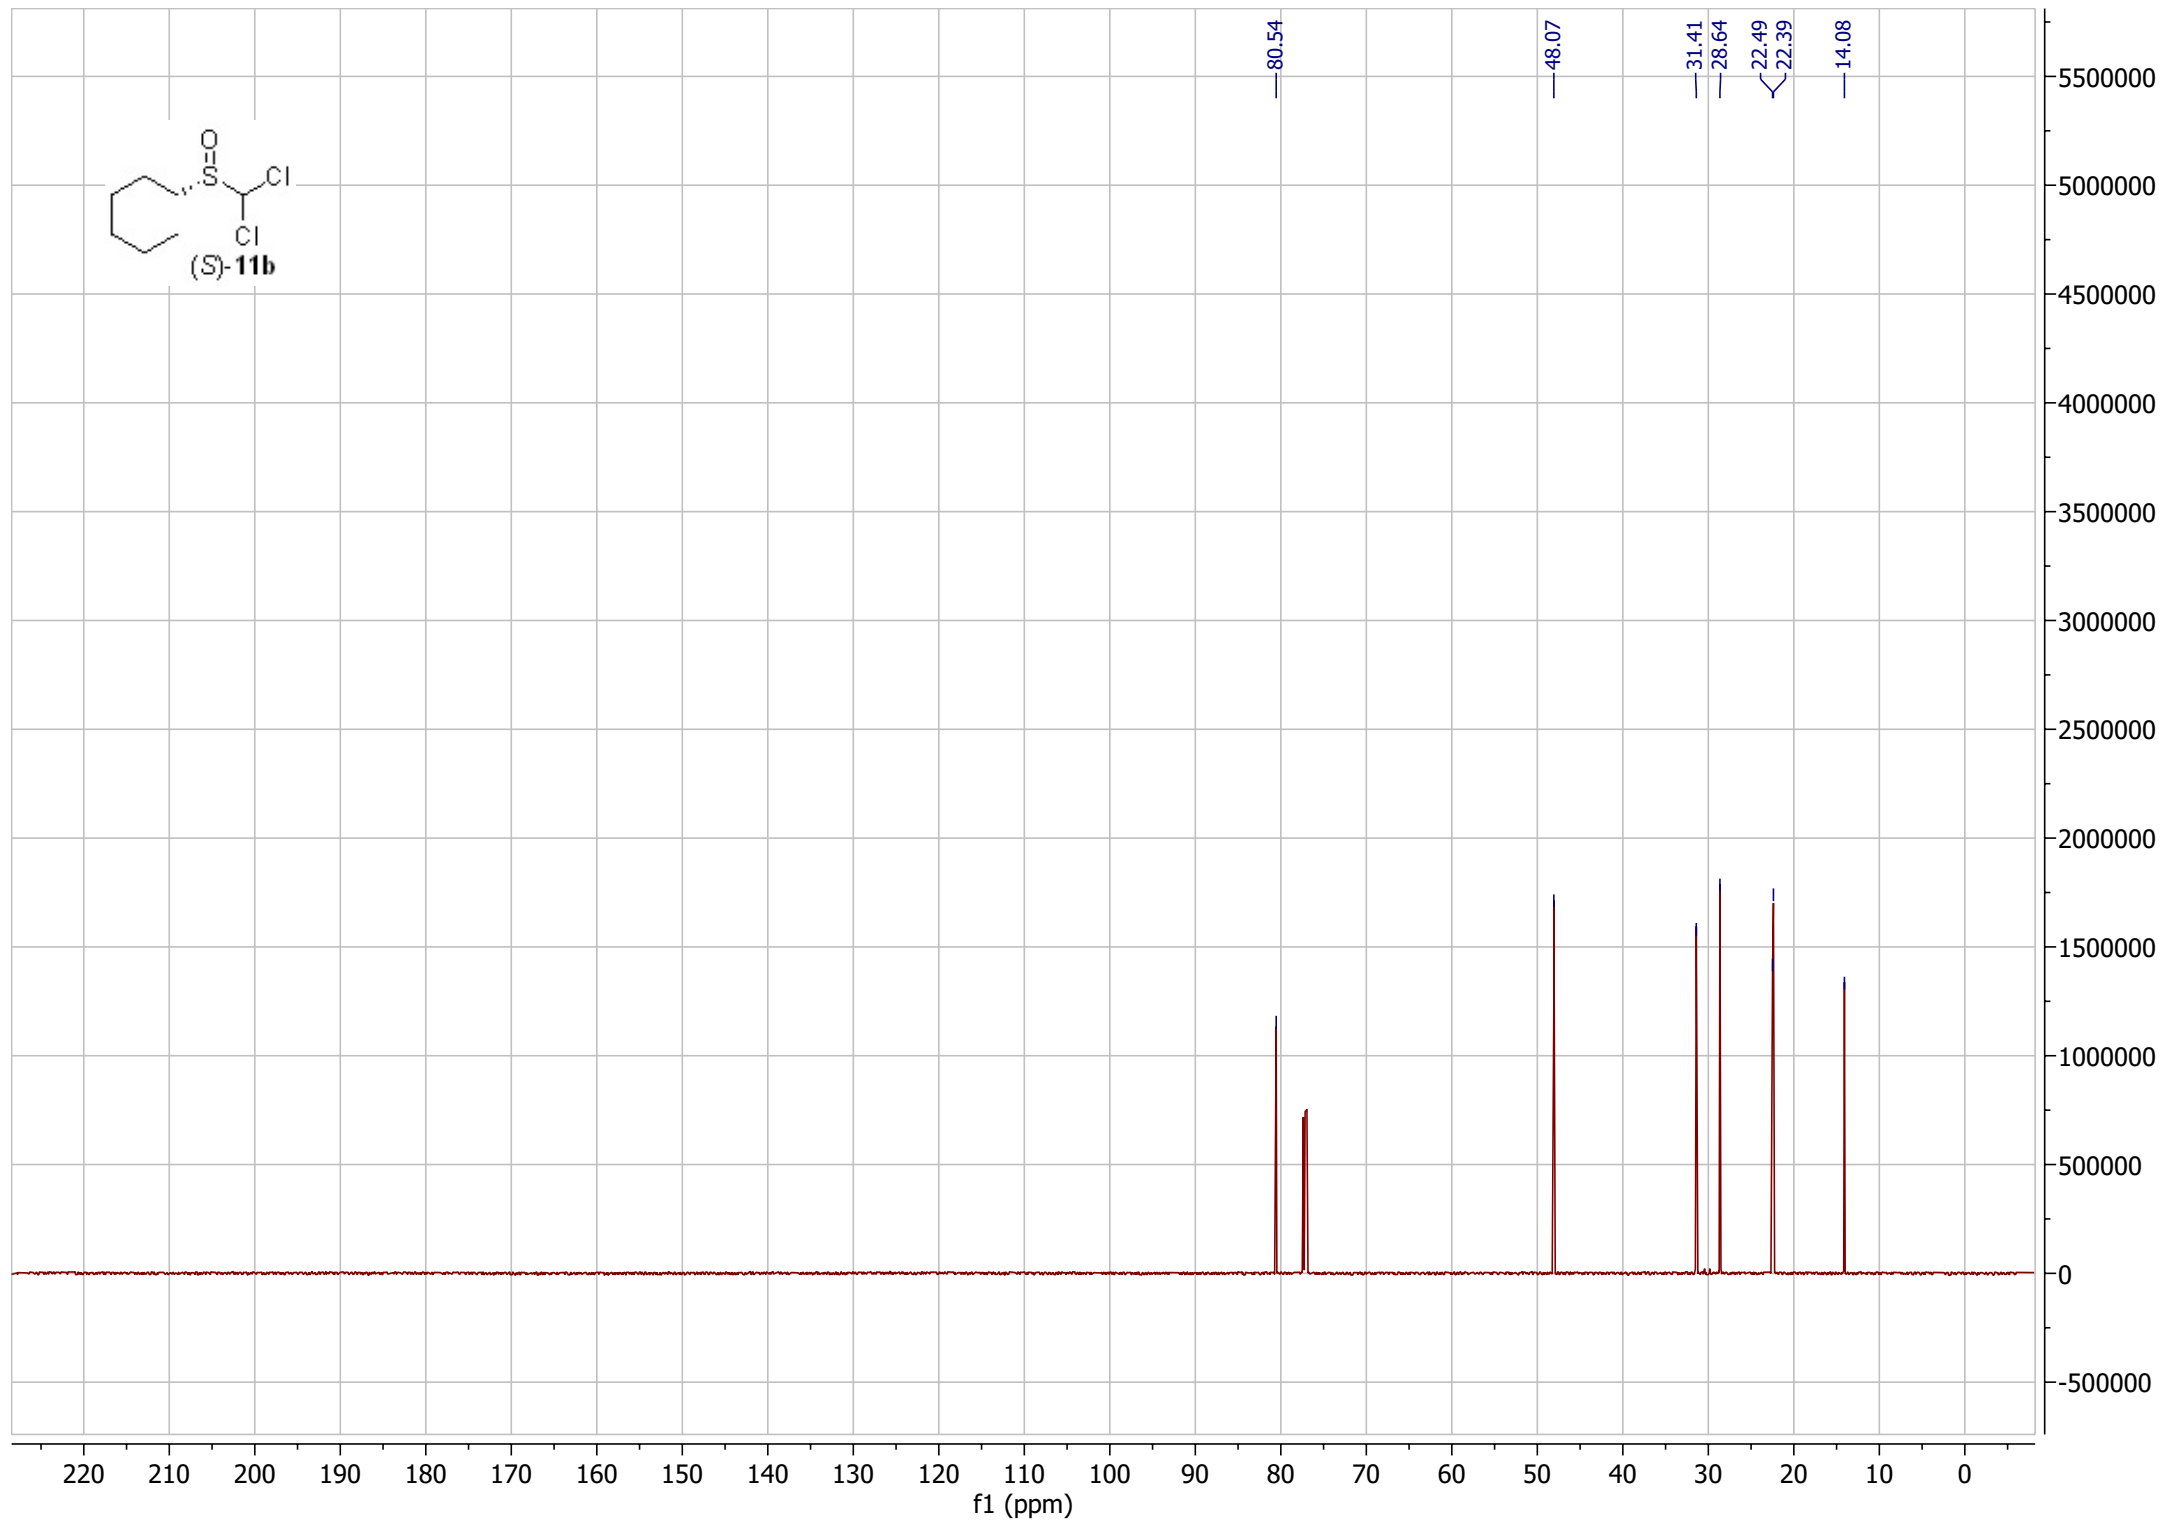

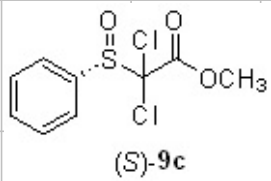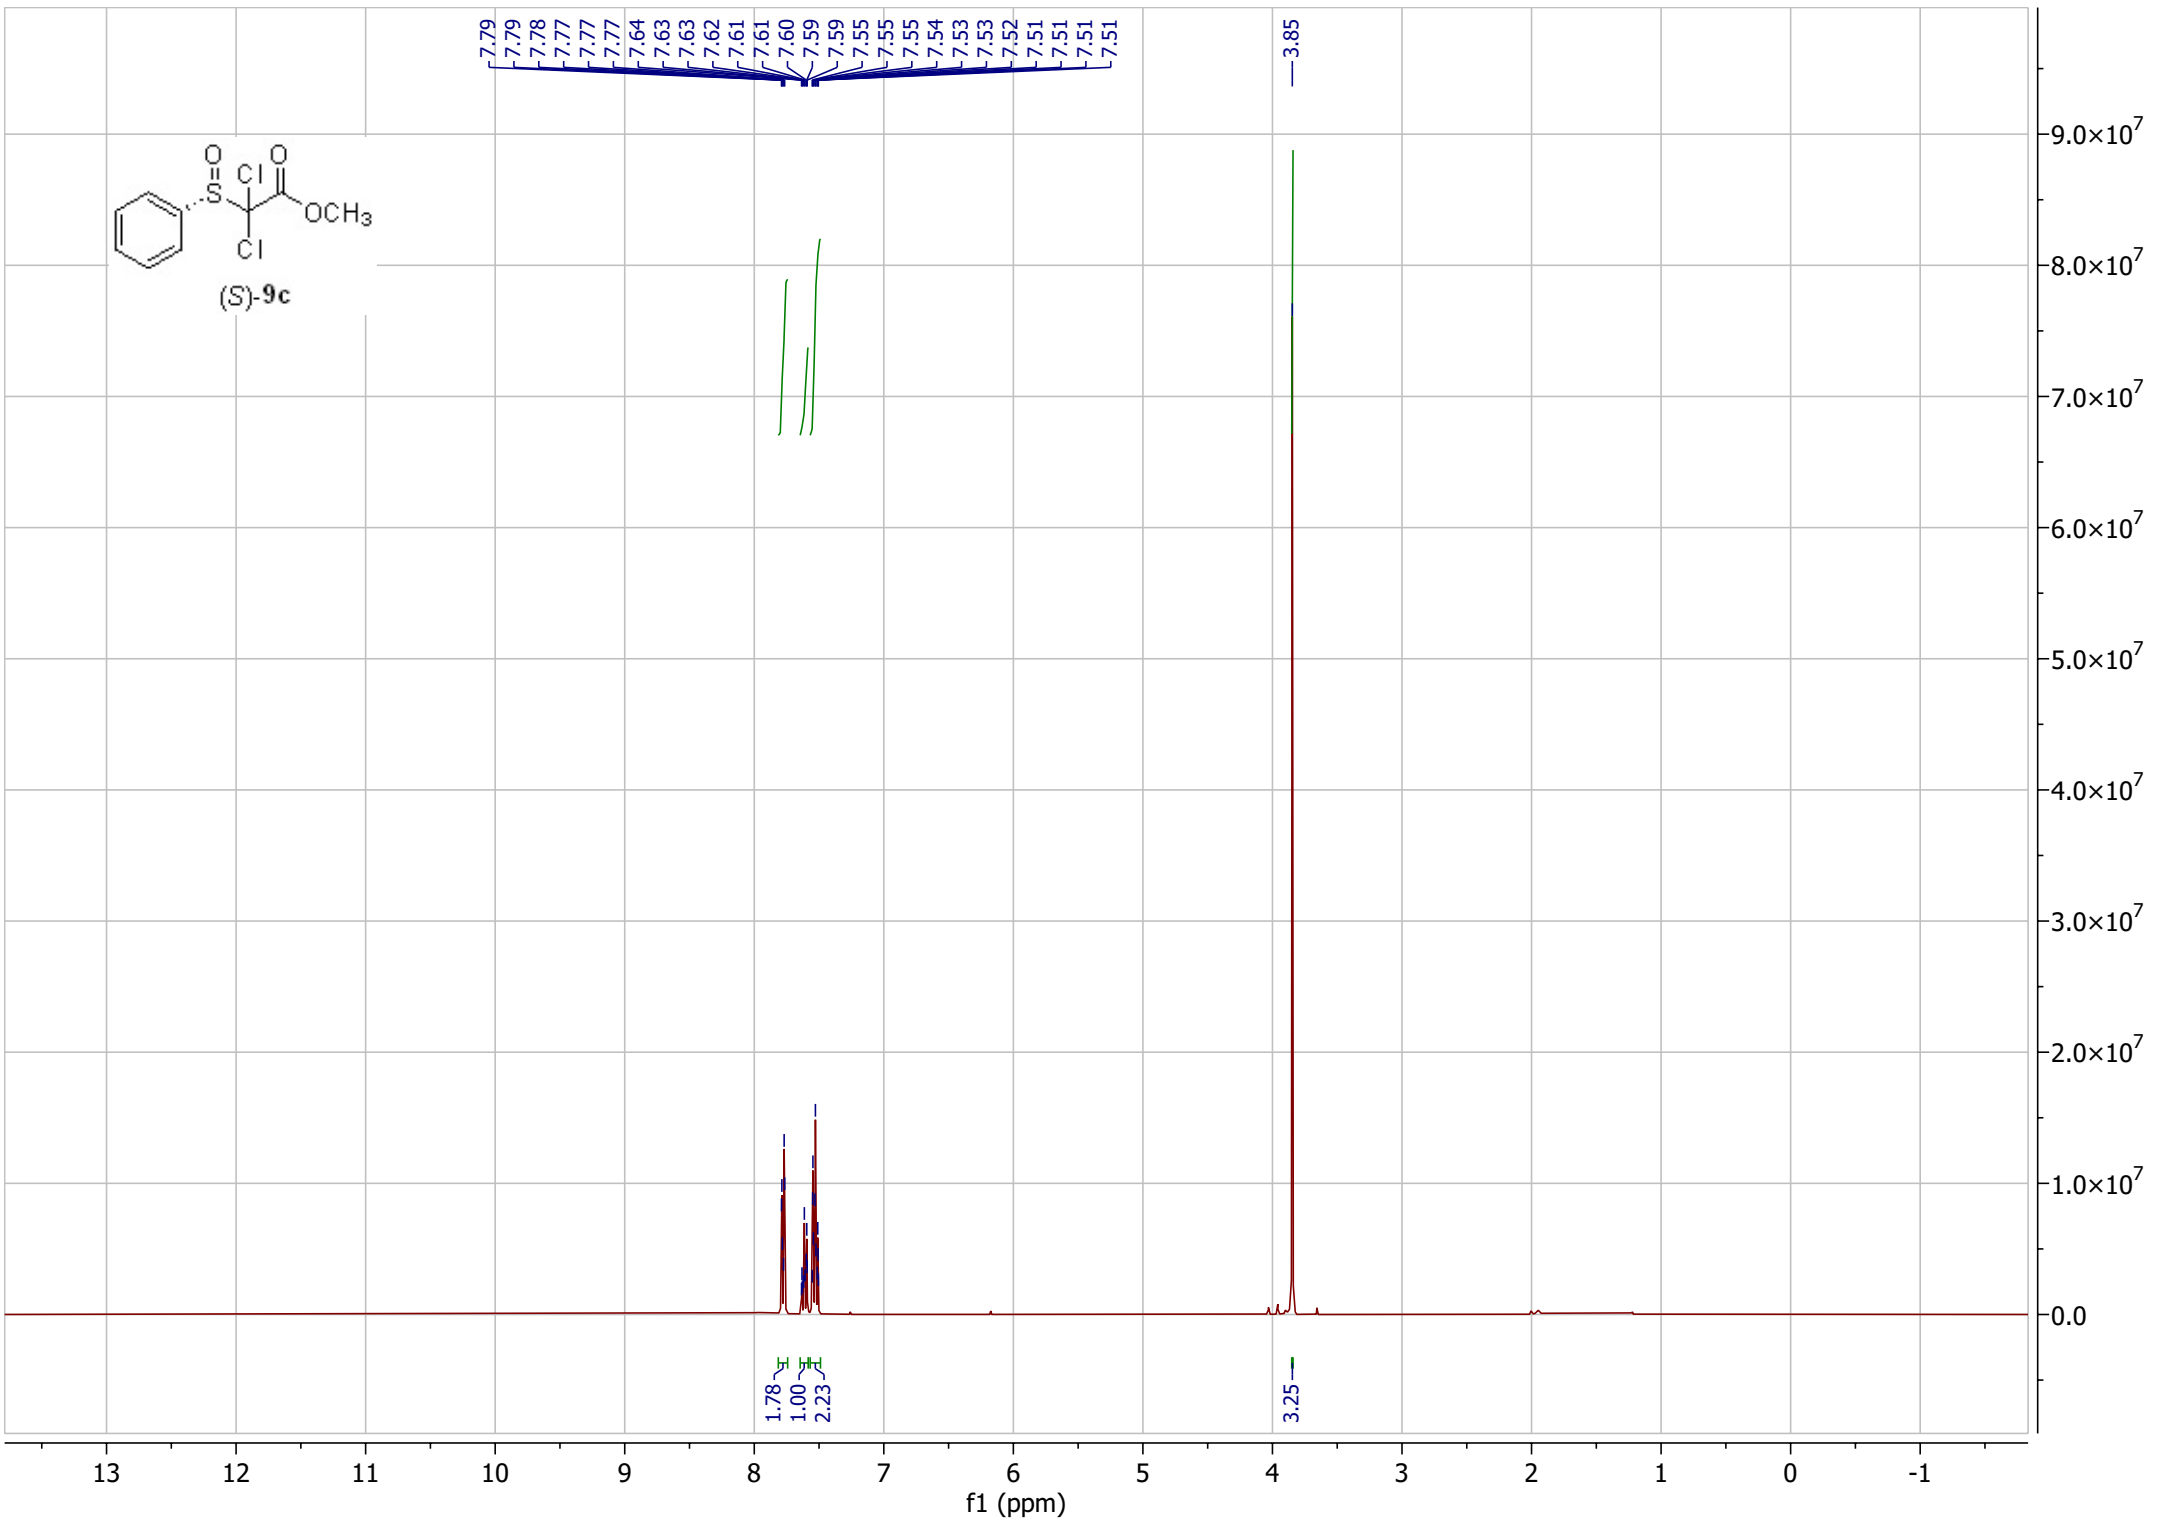

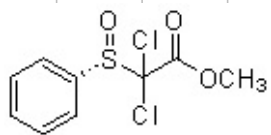

(S)-9c

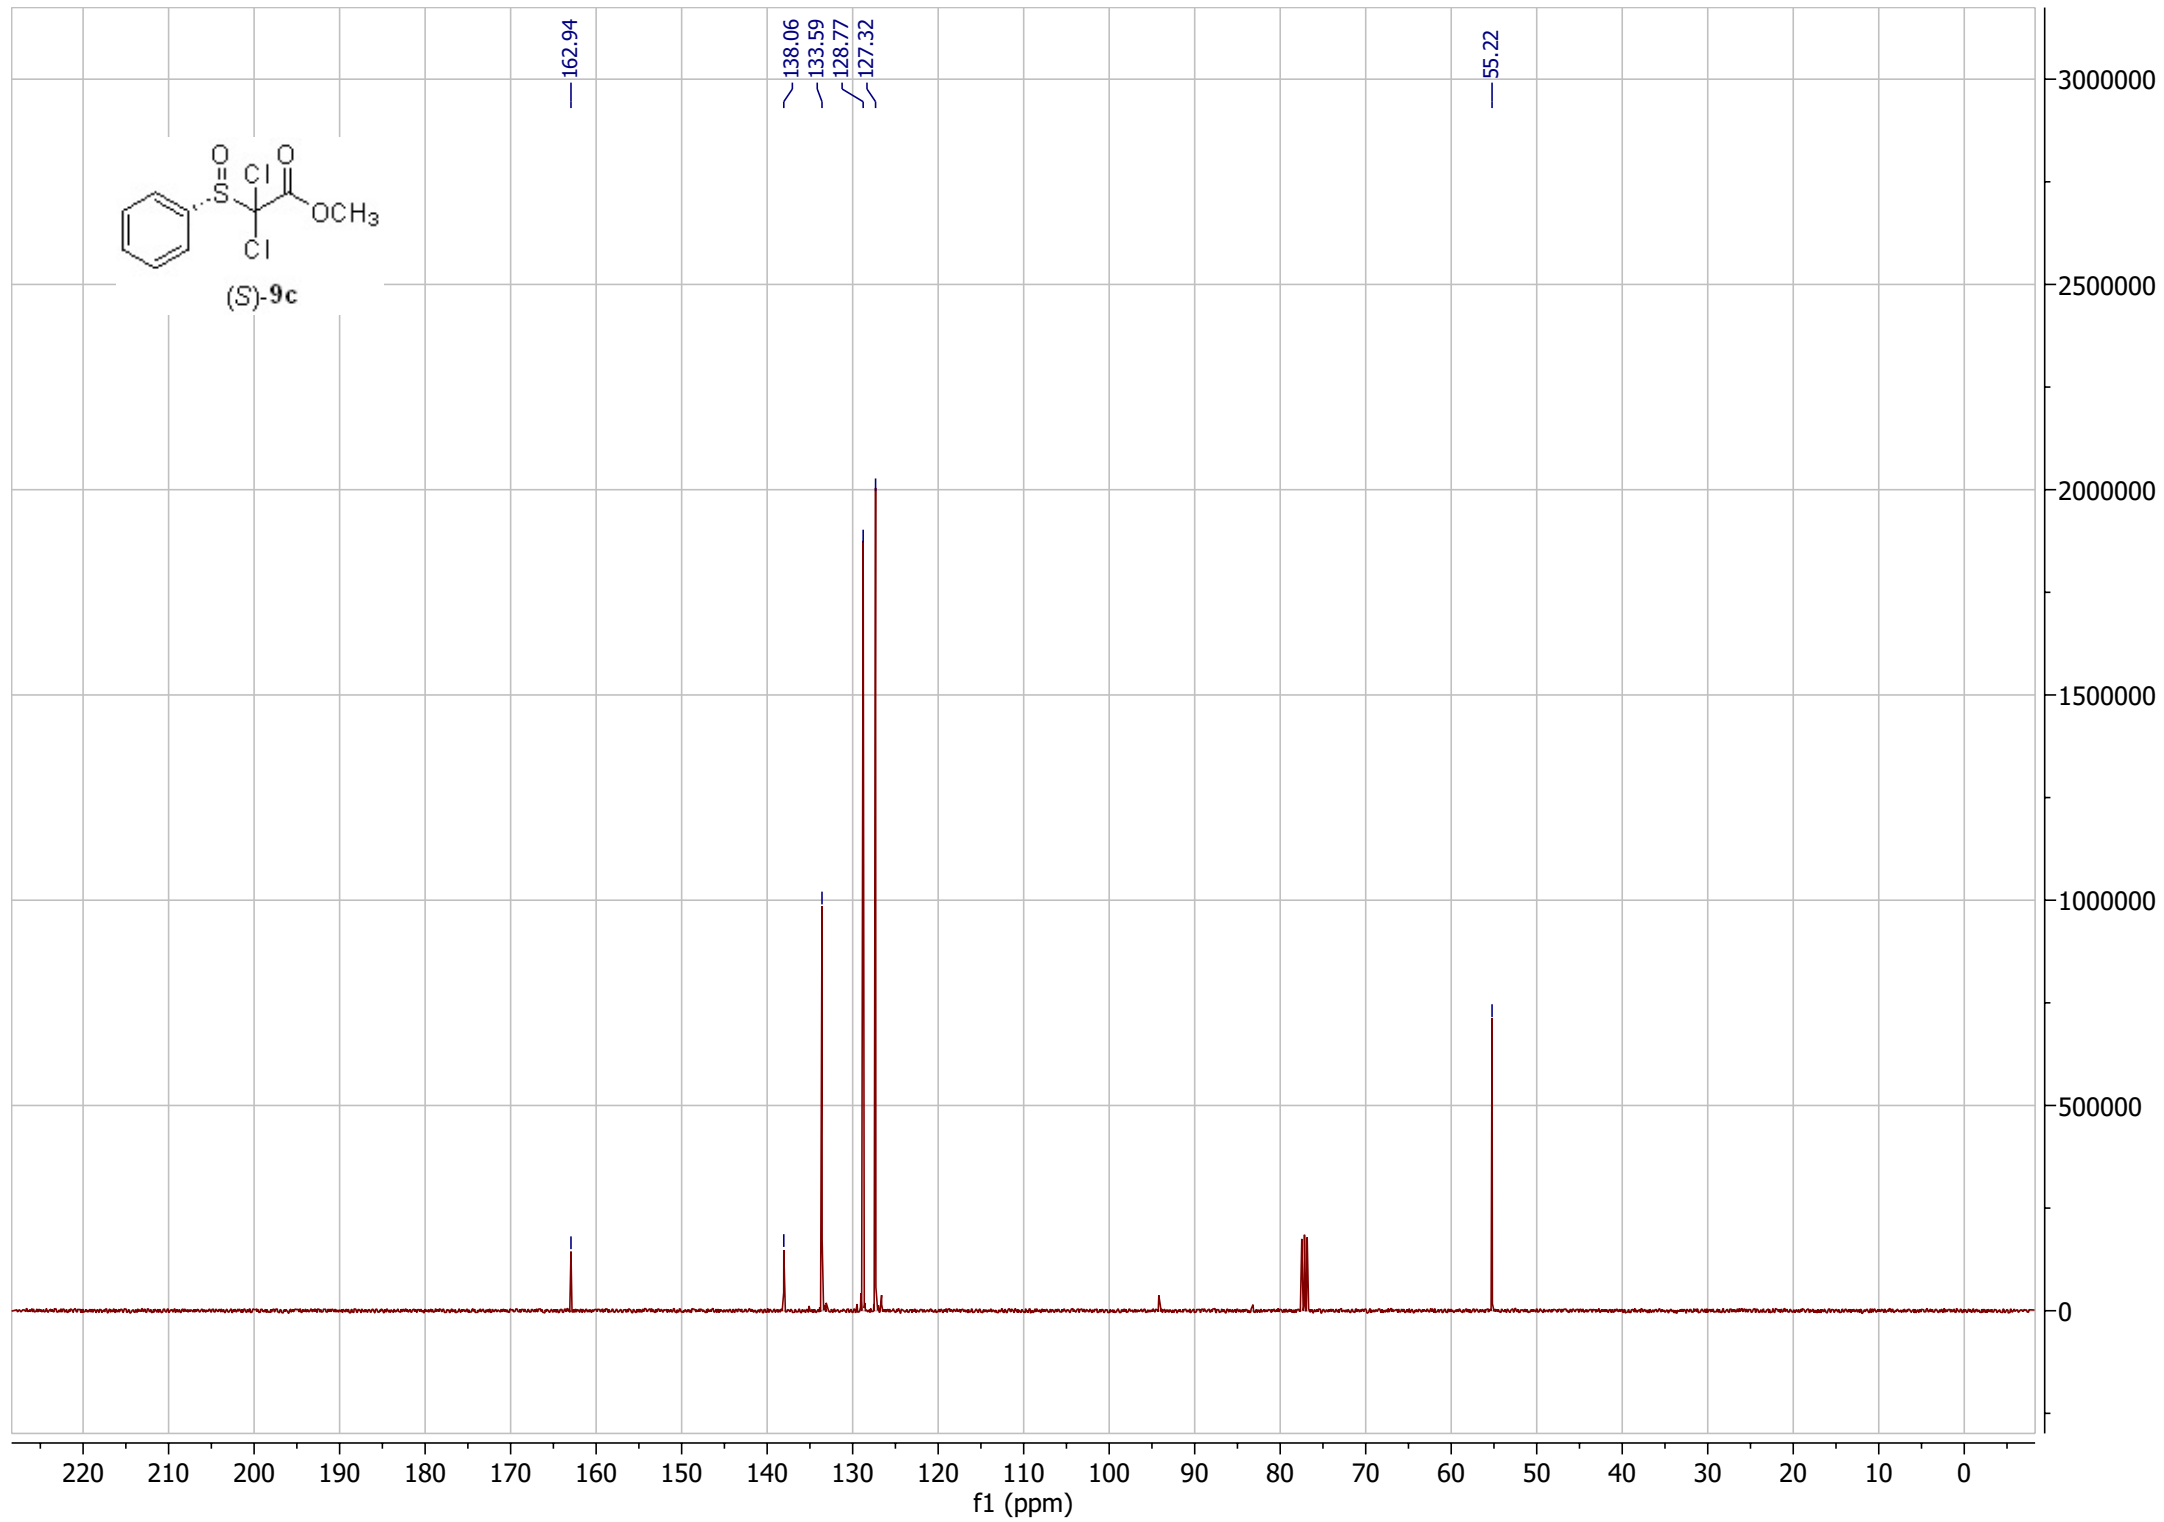

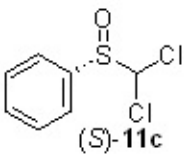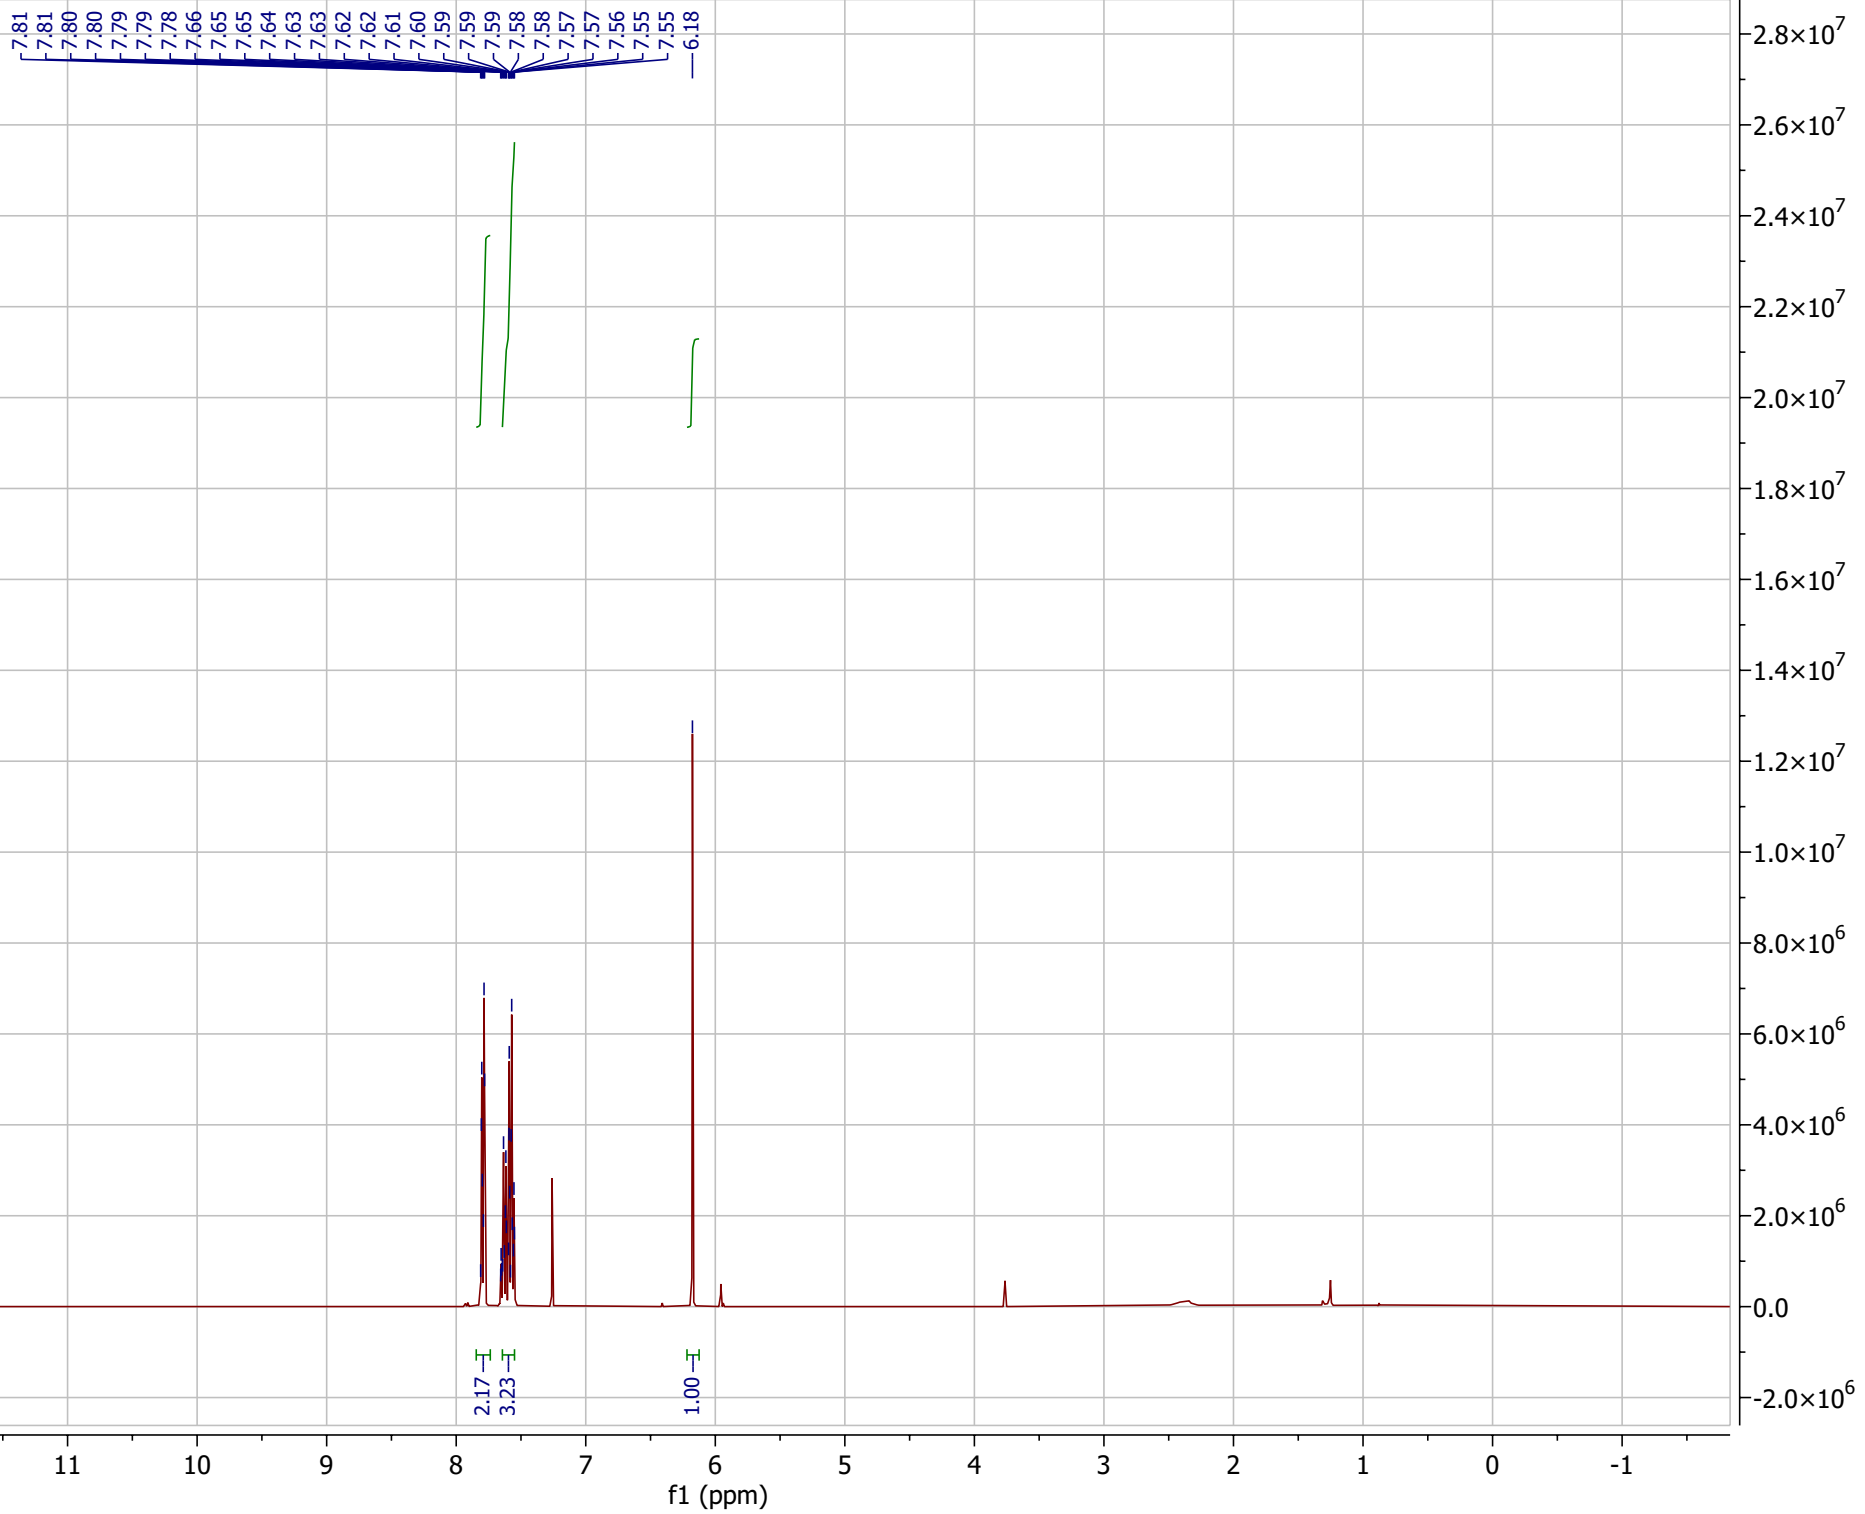

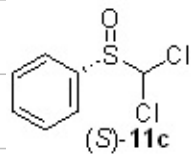

138.16  
133.23  
129.14  
126.79

83.18

220 210 200 190 180 170 160 150 140 130 120 110 100 90 80 70 60 50 40 30 20 10 0

f1 (ppm)

1700000  
1600000  
1500000  
1400000  
1300000  
1200000  
1100000  
1000000  
900000  
800000  
700000  
600000  
500000  
400000  
300000  
200000  
100000  
0  
-100000

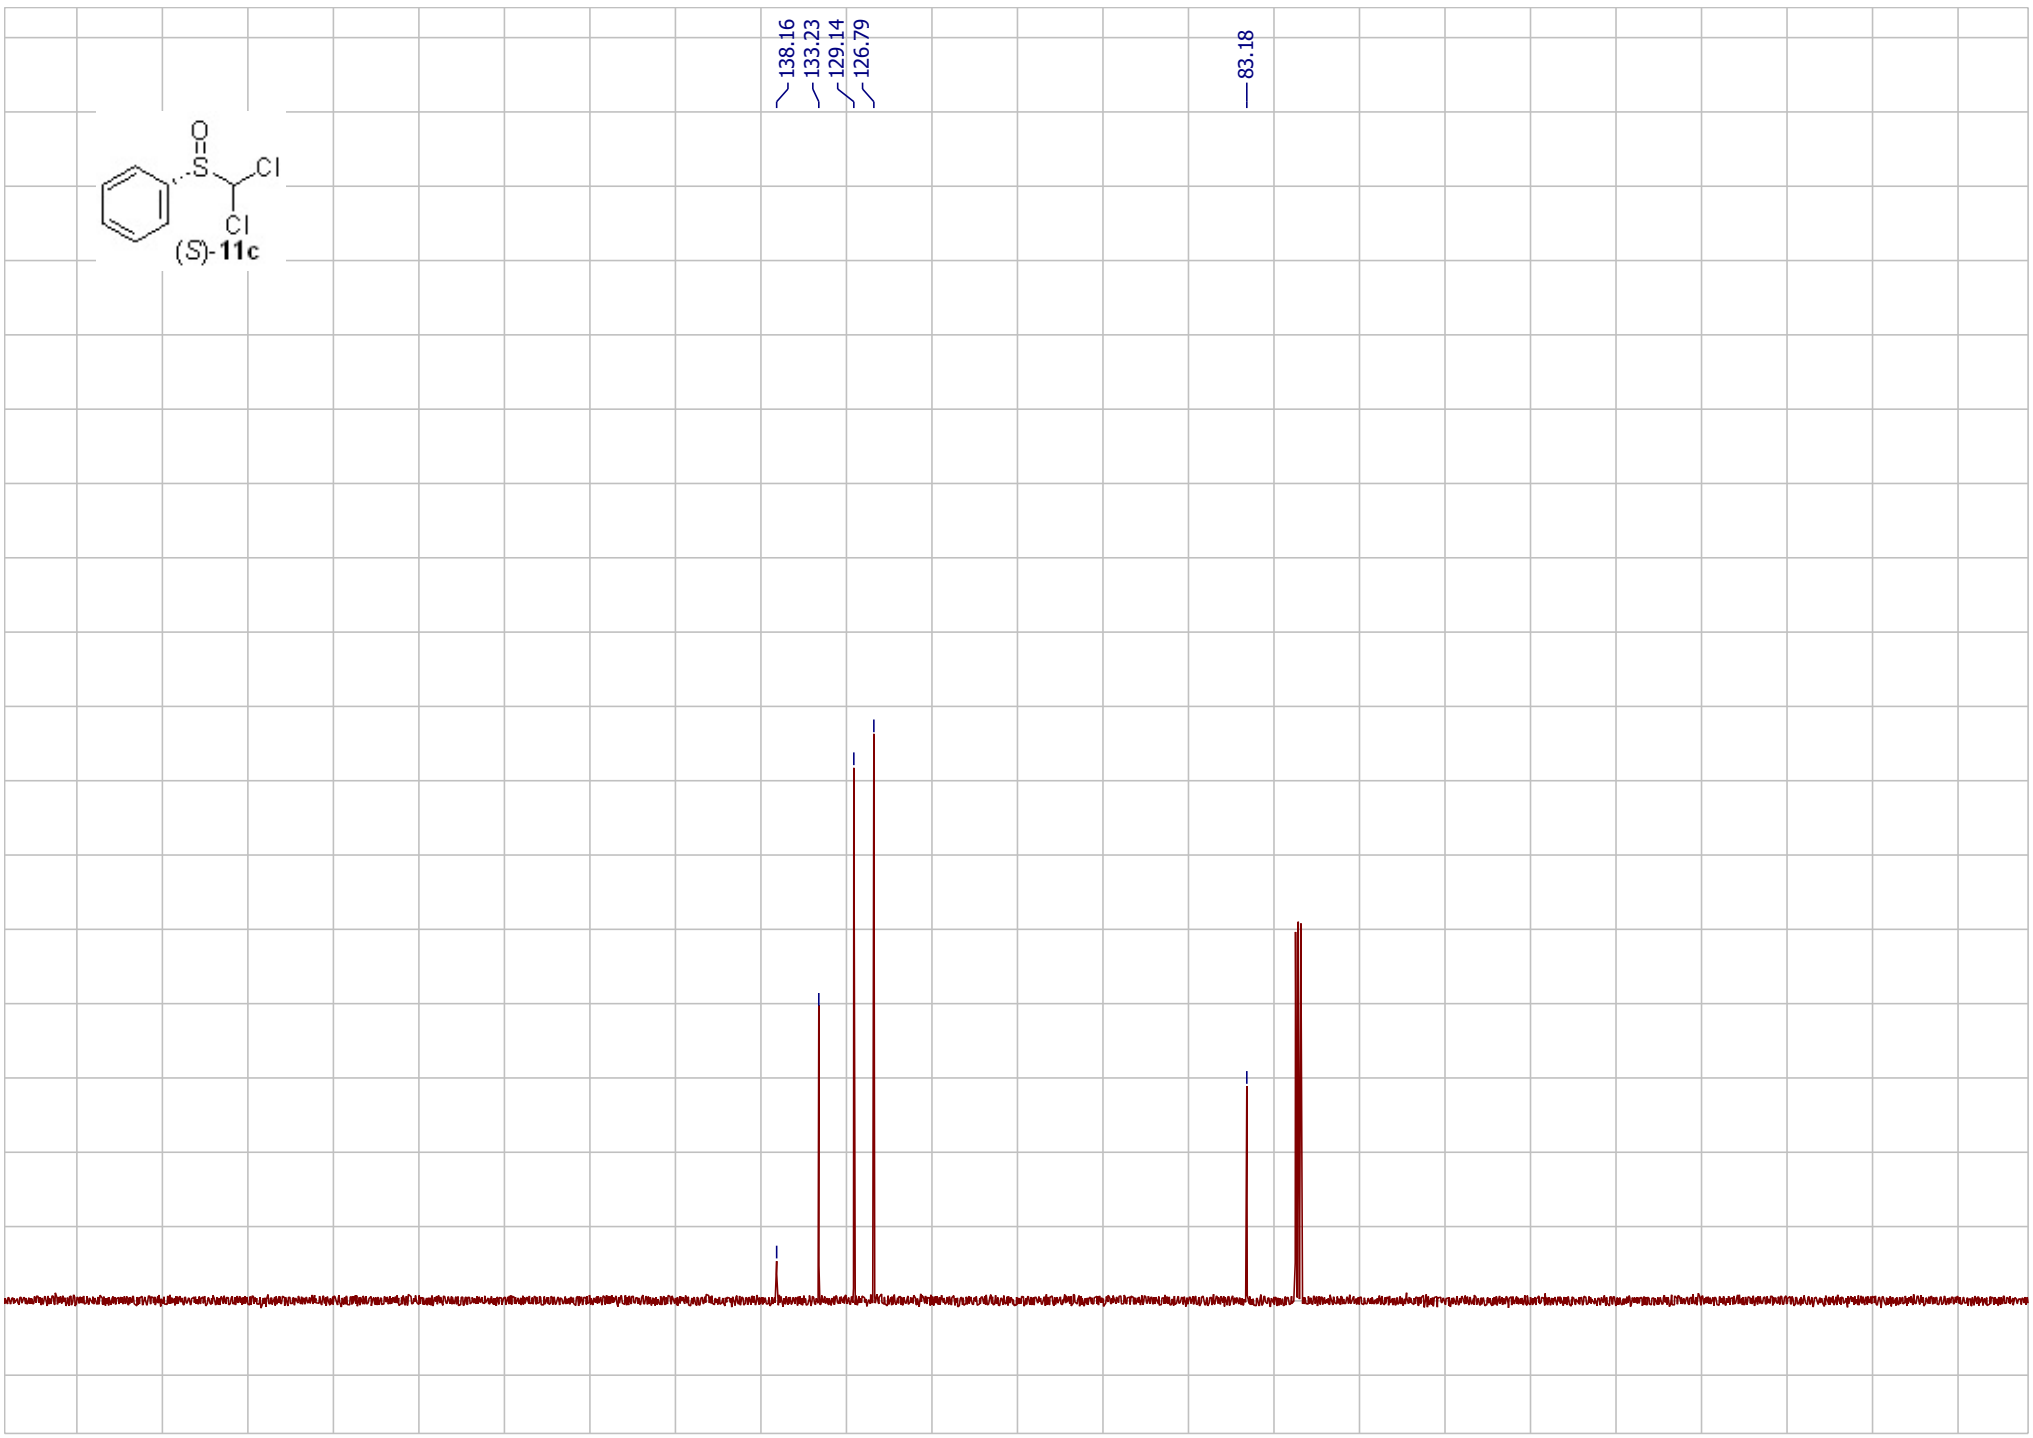

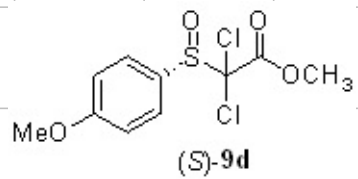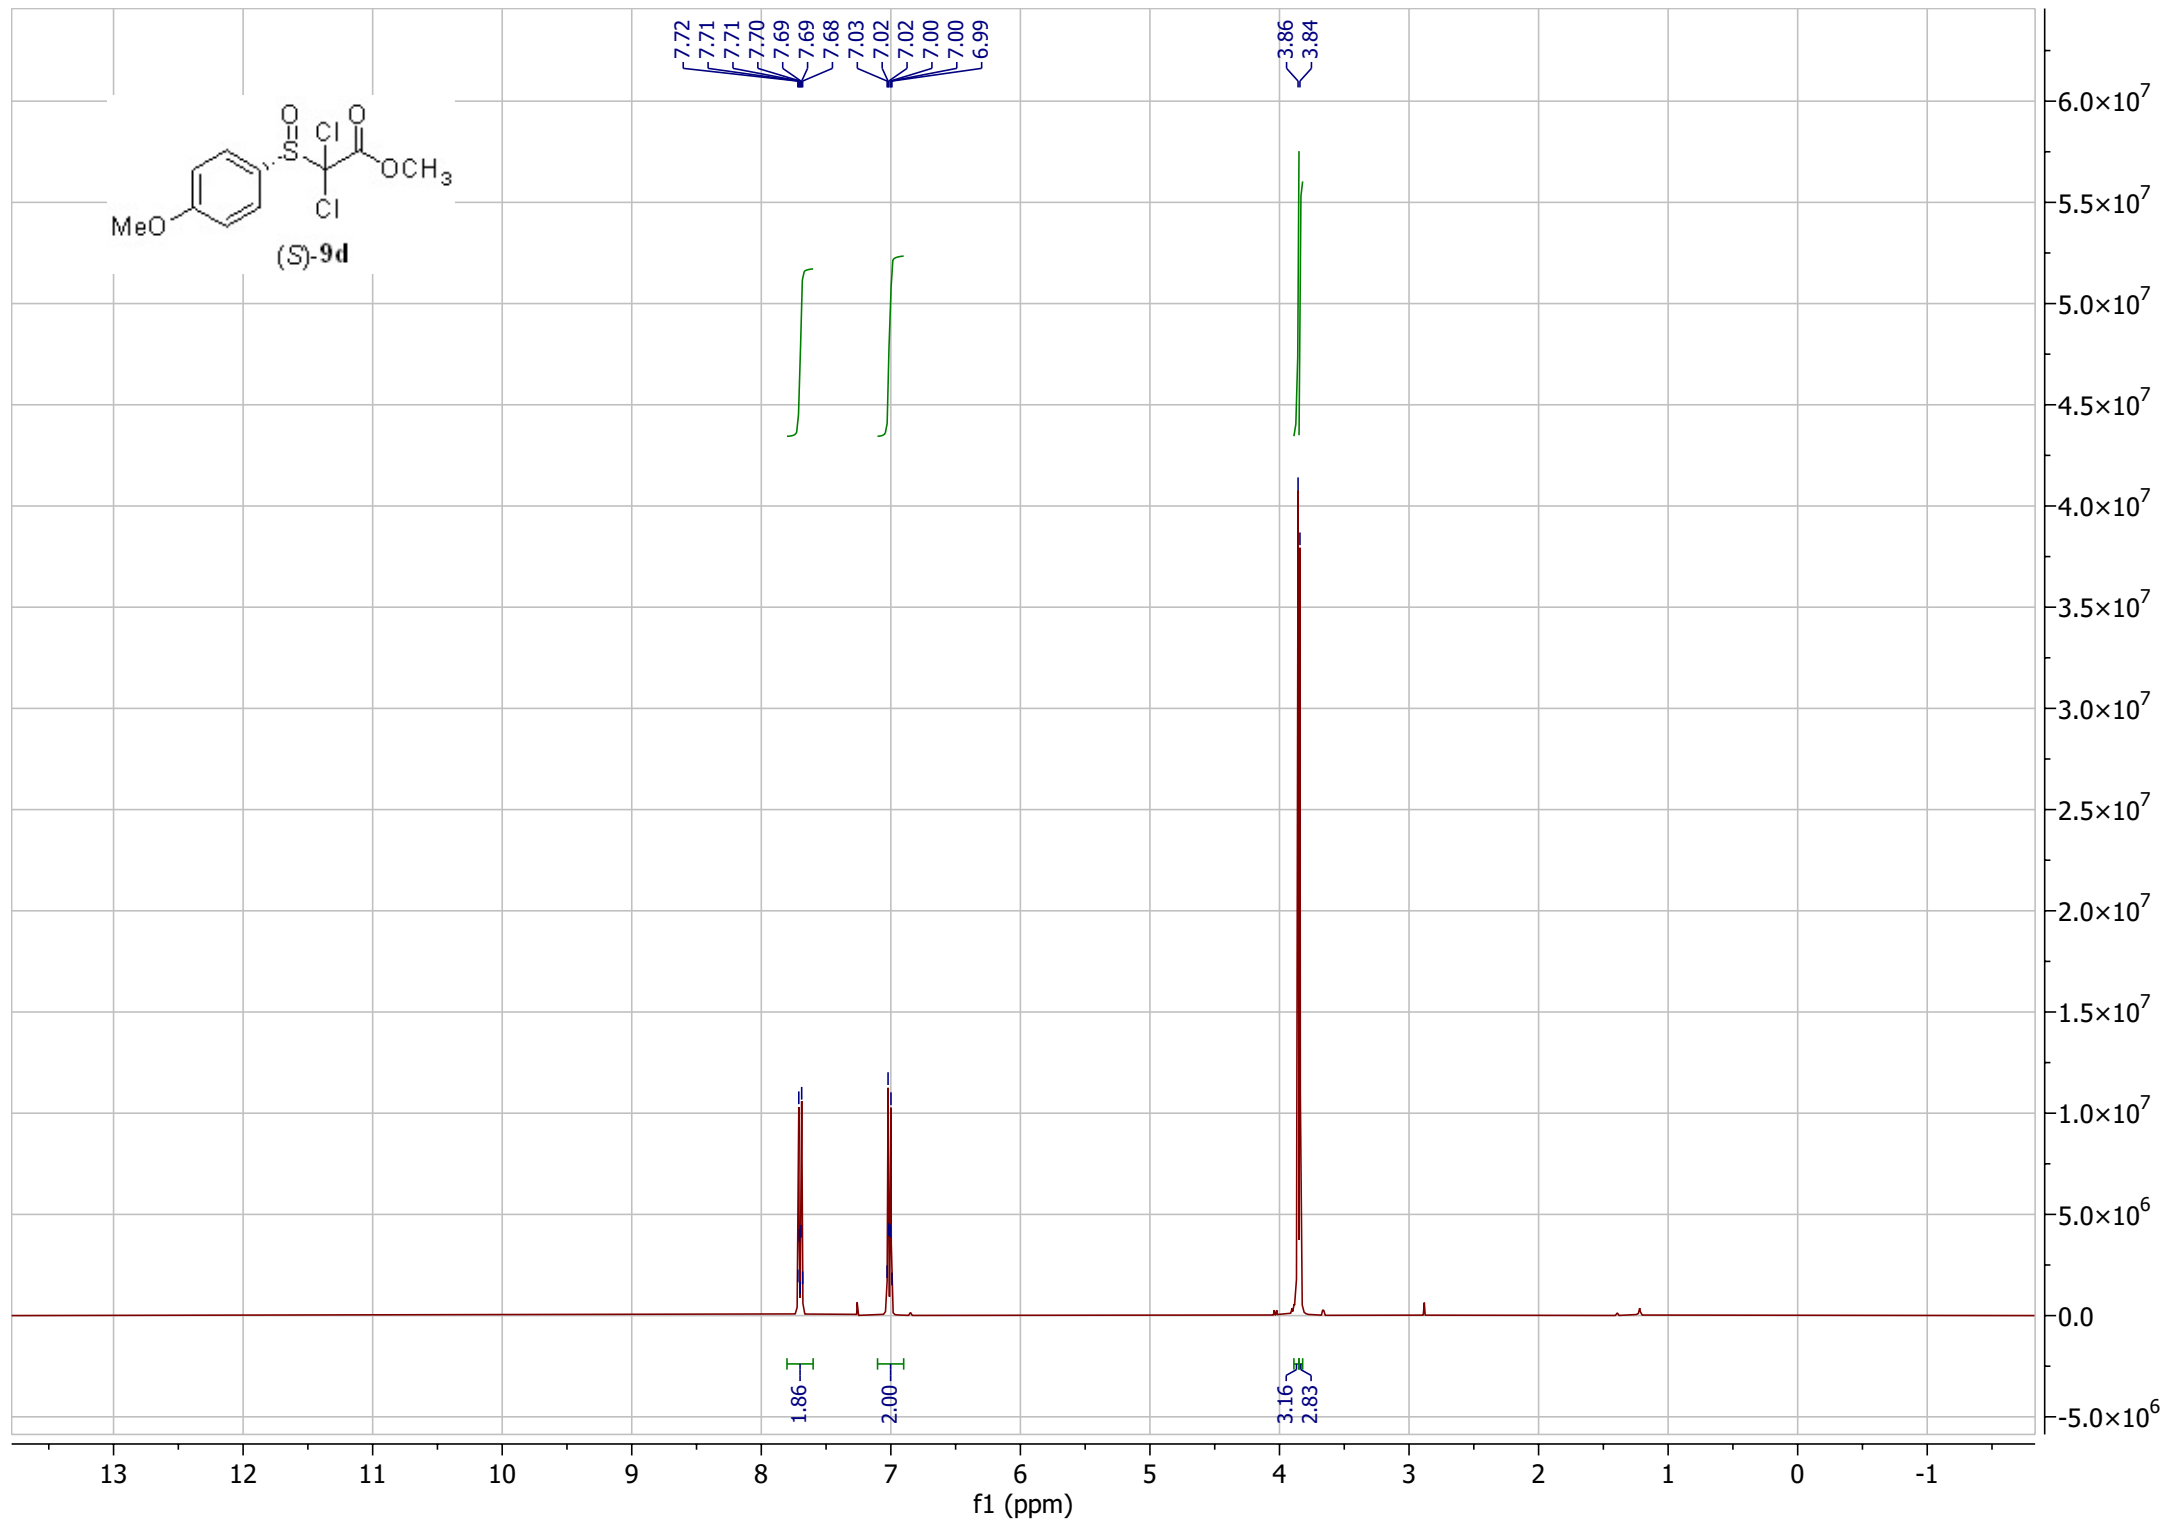

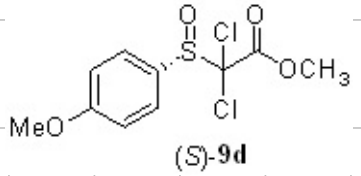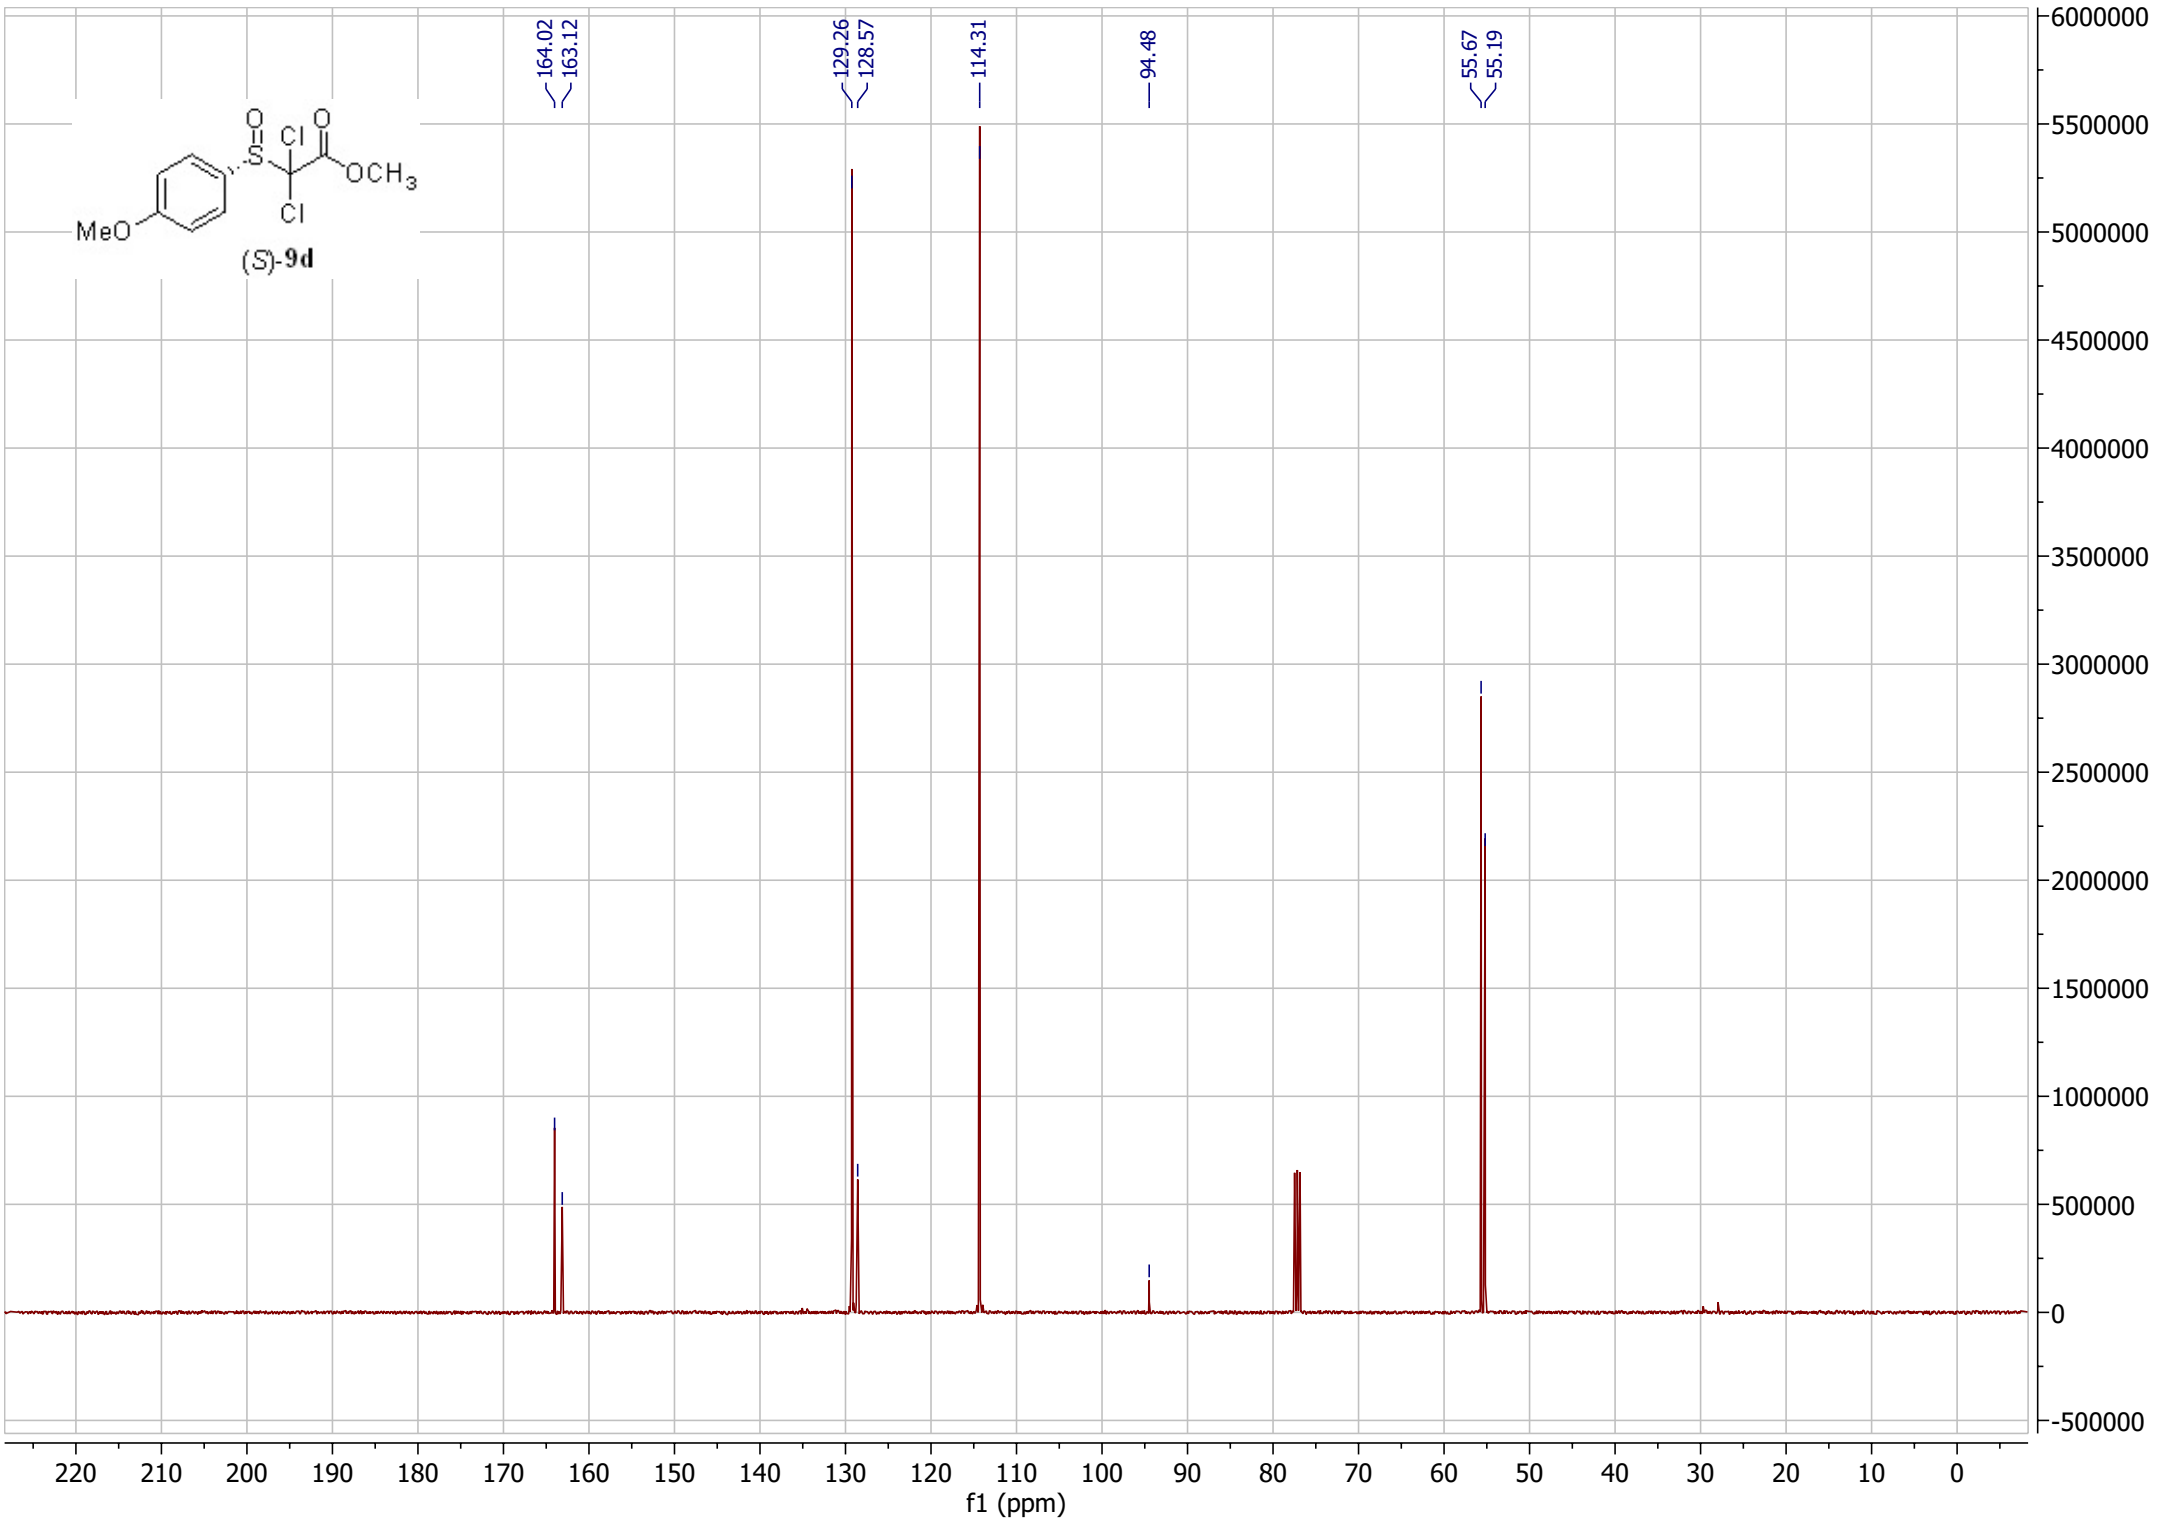



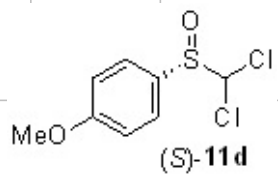

7.73  
7.73  
7.72  
7.72  
7.71  
7.70  
7.70  
7.07  
7.06  
7.06  
7.05  
7.04  
7.03  
6.14

3.87

1.99

2.15

1.00

3.05

f1 (ppm)

1.0×10<sup>8</sup>  
9.0×10<sup>7</sup>  
8.0×10<sup>7</sup>  
7.0×10<sup>7</sup>  
6.0×10<sup>7</sup>  
5.0×10<sup>7</sup>  
4.0×10<sup>7</sup>  
3.0×10<sup>7</sup>  
2.0×10<sup>7</sup>  
1.0×10<sup>7</sup>  
0.0

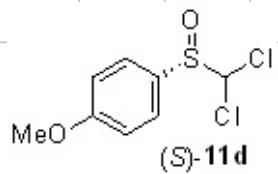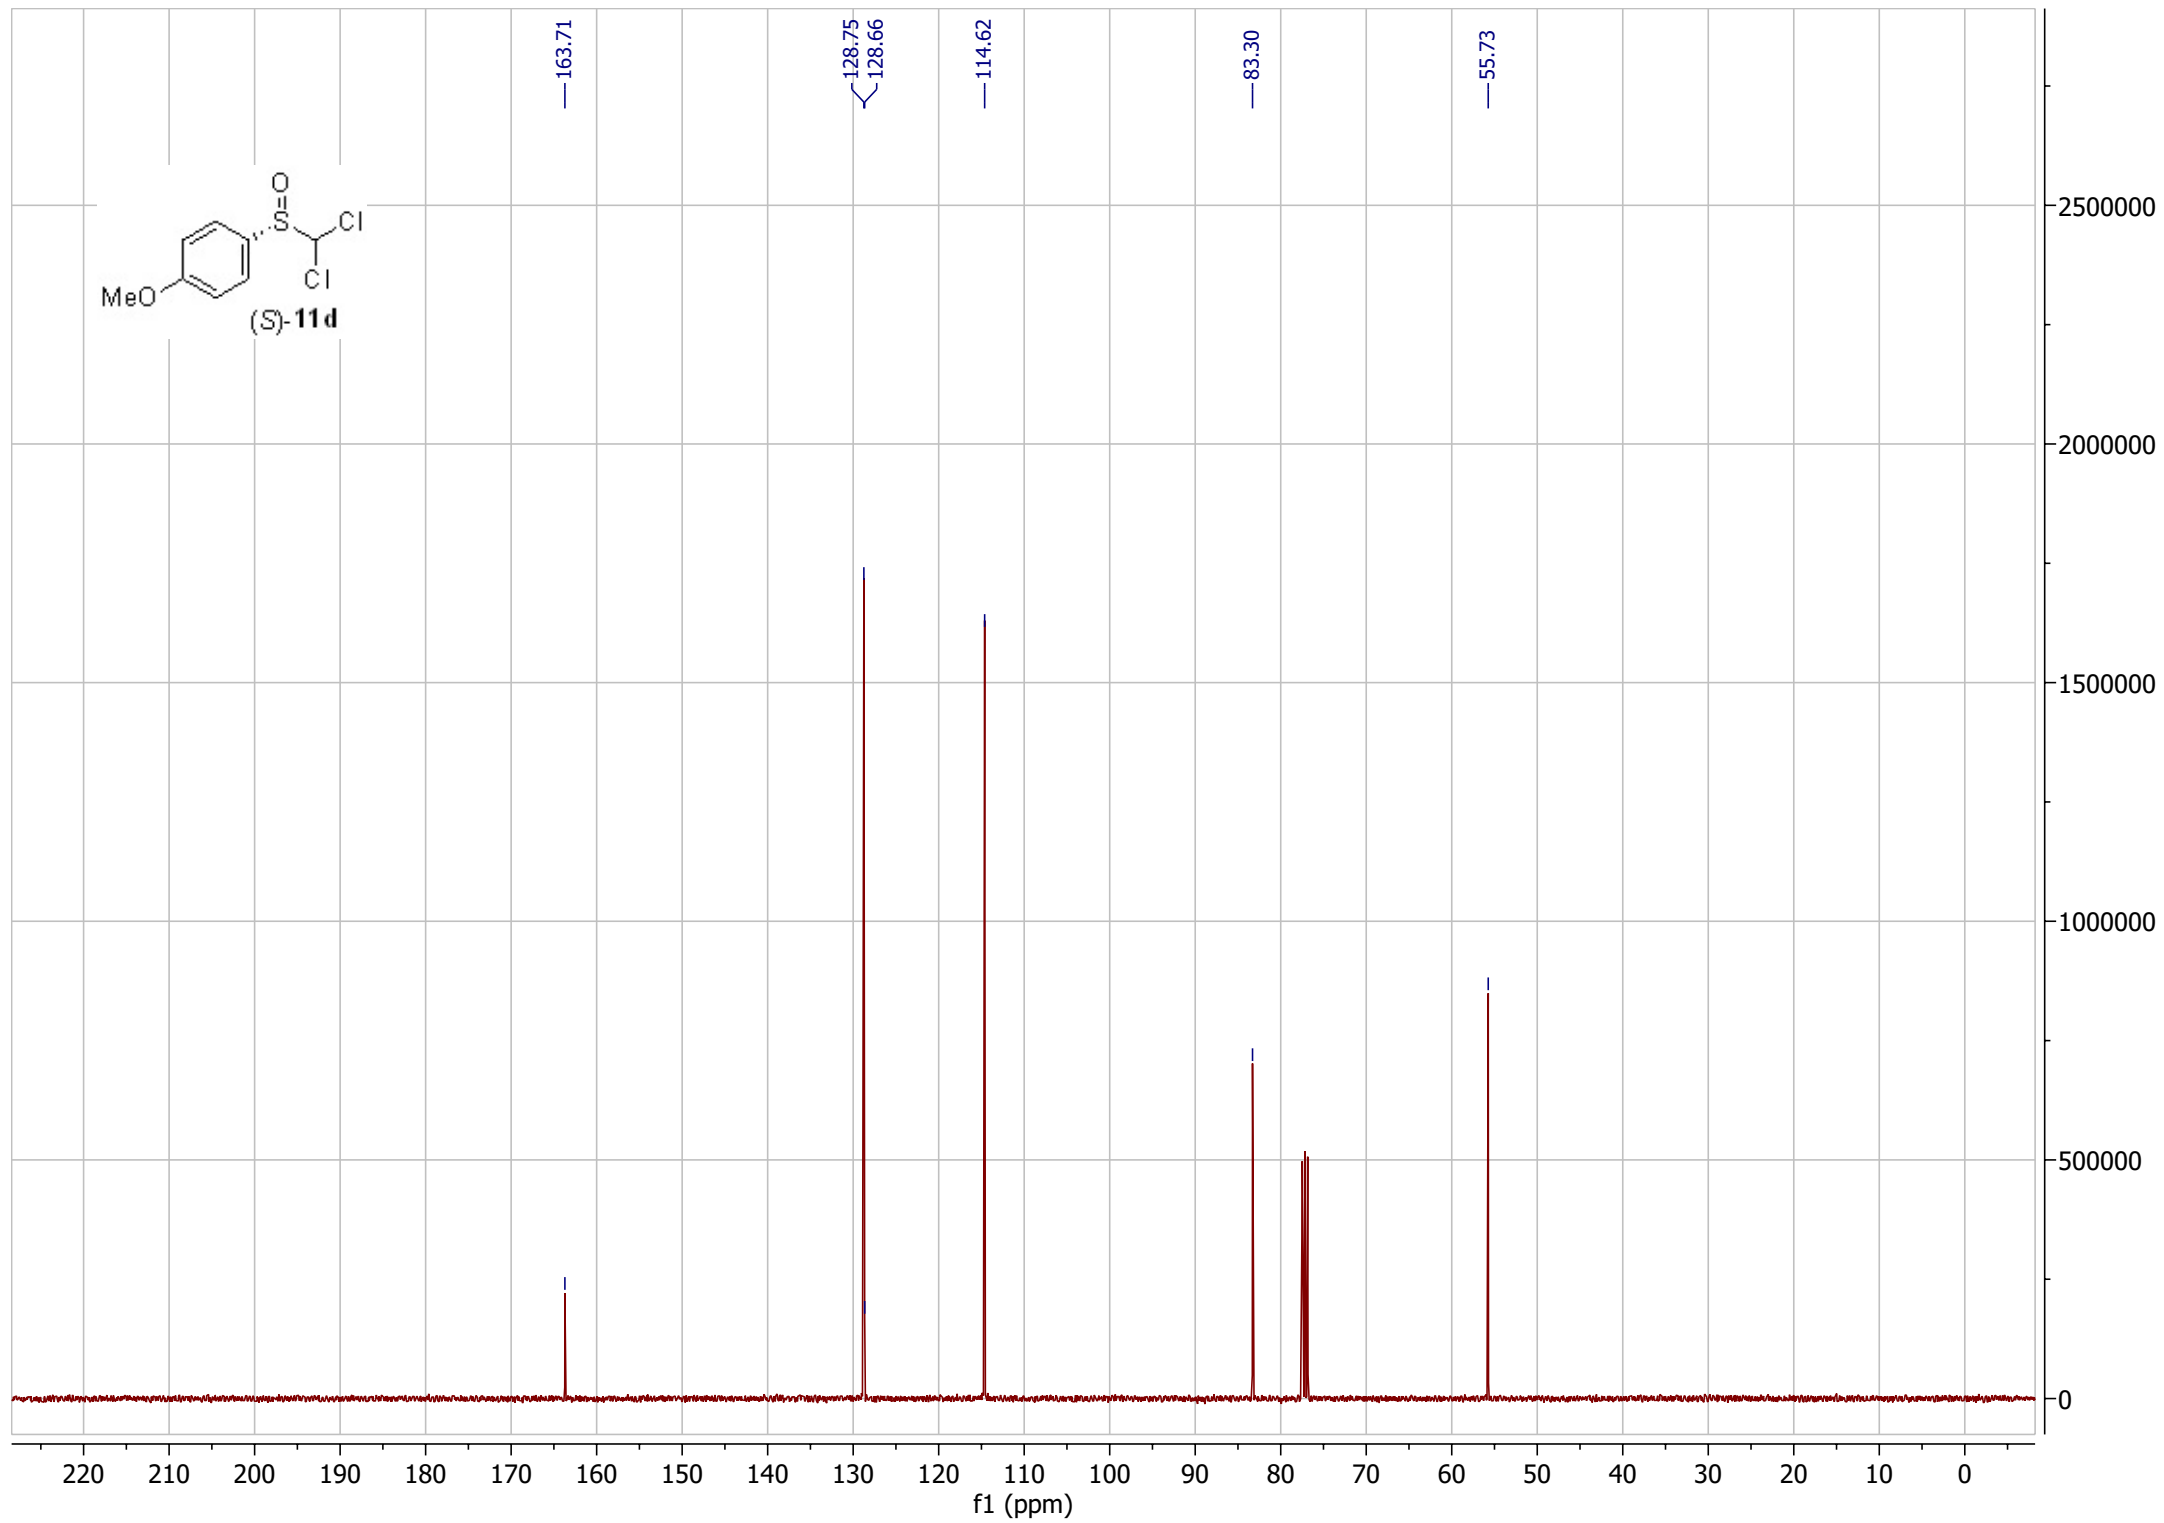

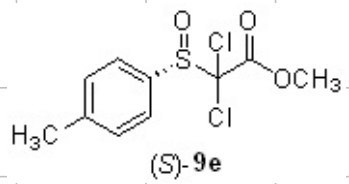

7.70  
7.69  
7.69  
7.68  
7.67  
7.67  
7.36  
7.36  
7.35  
7.34

3.89

2.45

2.00

2.15

3.10

3.35

f1 (ppm)

13 12 11 10 9 8 7 6 5 4 3 2 1 0 -1

$7.0 \times 10^7$   
 $6.5 \times 10^7$   
 $6.0 \times 10^7$   
 $5.5 \times 10^7$   
 $5.0 \times 10^7$   
 $4.5 \times 10^7$   
 $4.0 \times 10^7$   
 $3.5 \times 10^7$   
 $3.0 \times 10^7$   
 $2.5 \times 10^7$   
 $2.0 \times 10^7$   
 $1.5 \times 10^7$   
 $1.0 \times 10^7$   
 $5.0 \times 10^6$   
 $0.0$   
 $-5.0 \times 10^6$

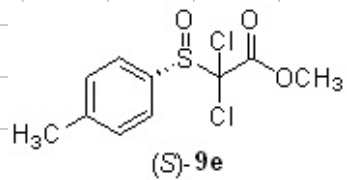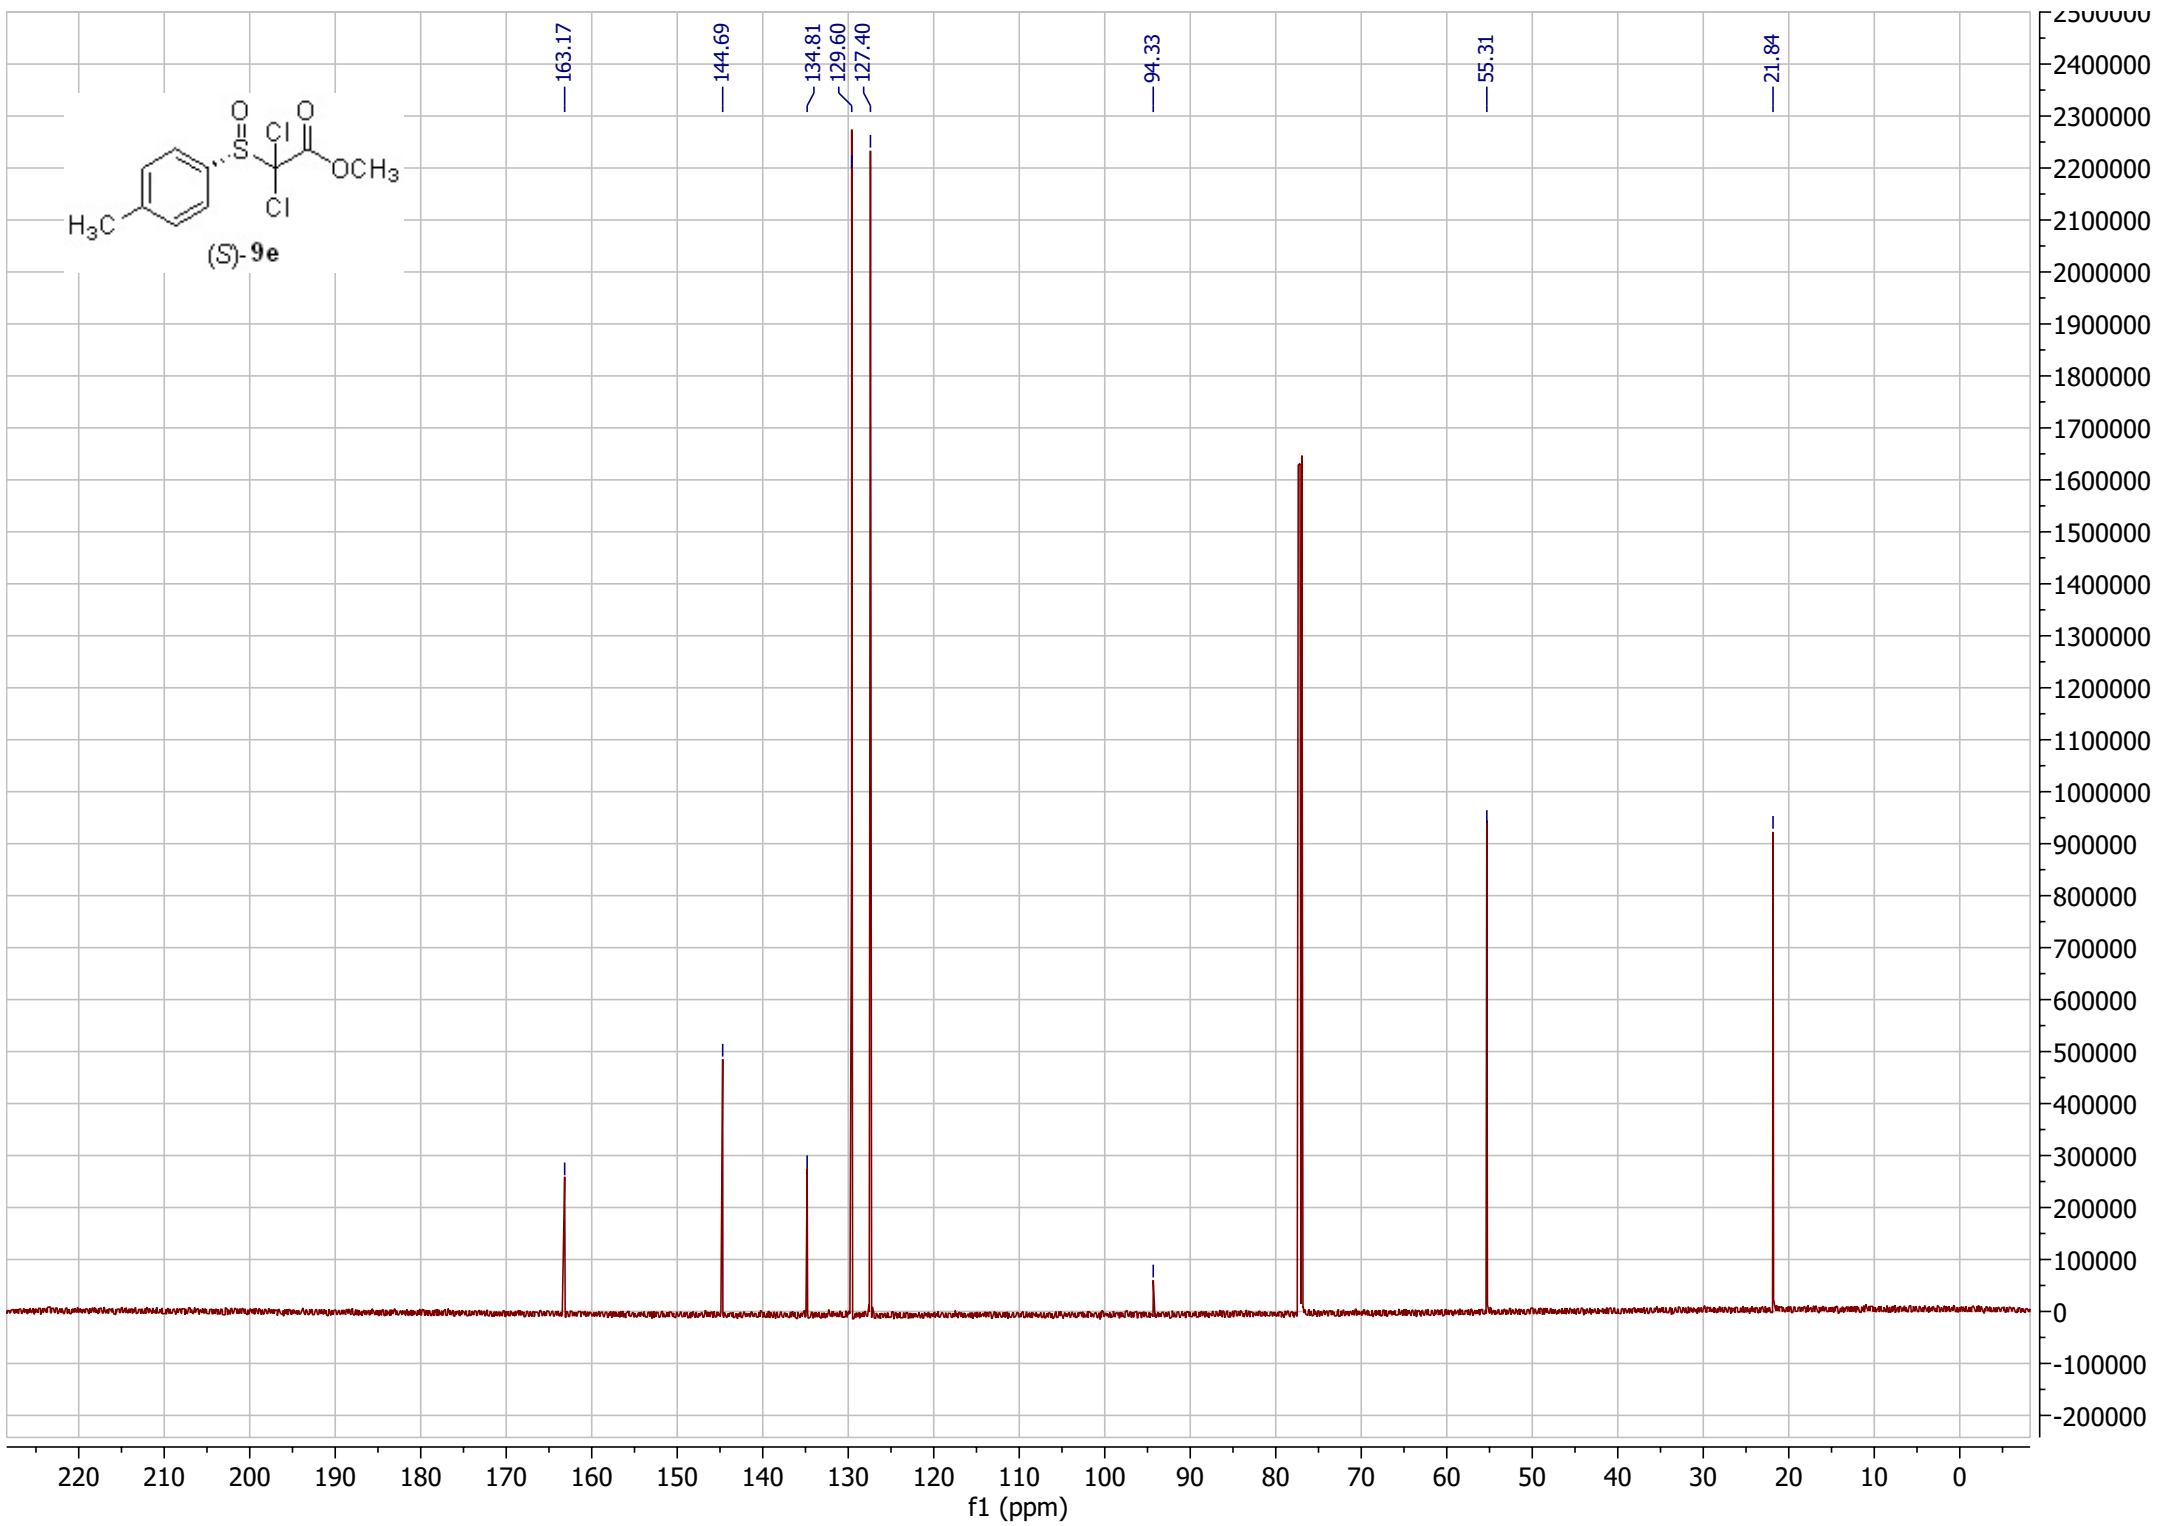

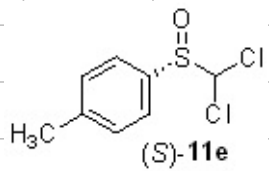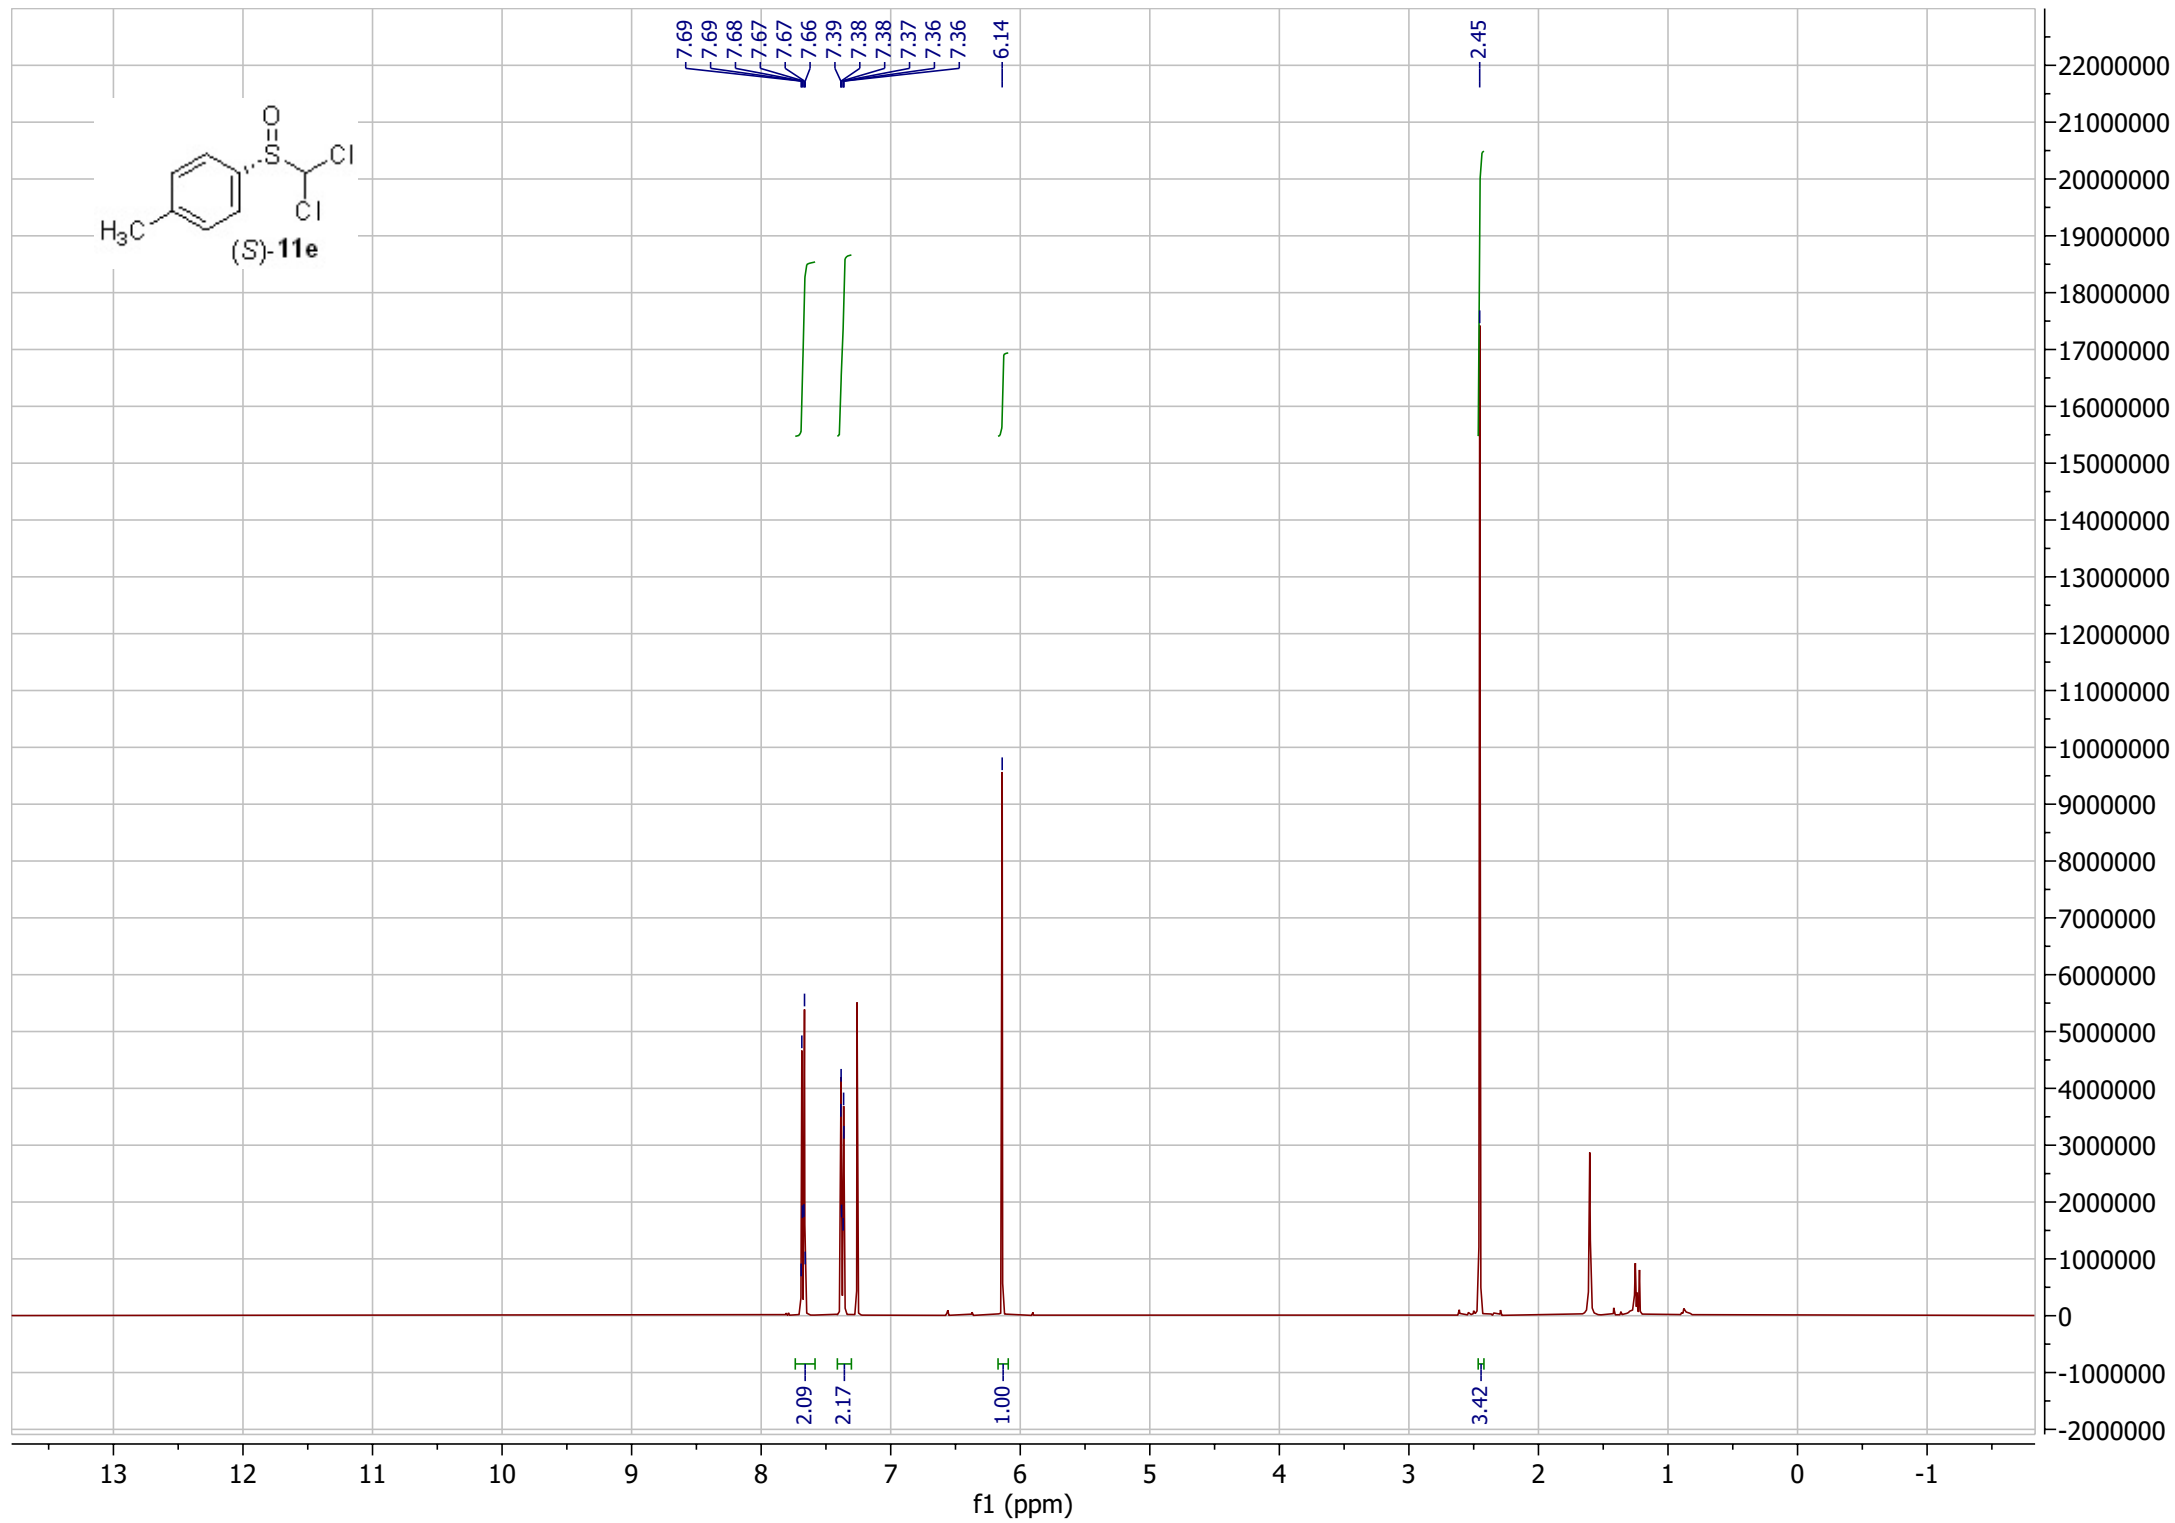

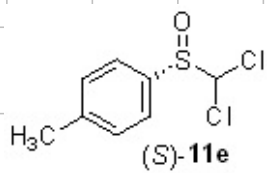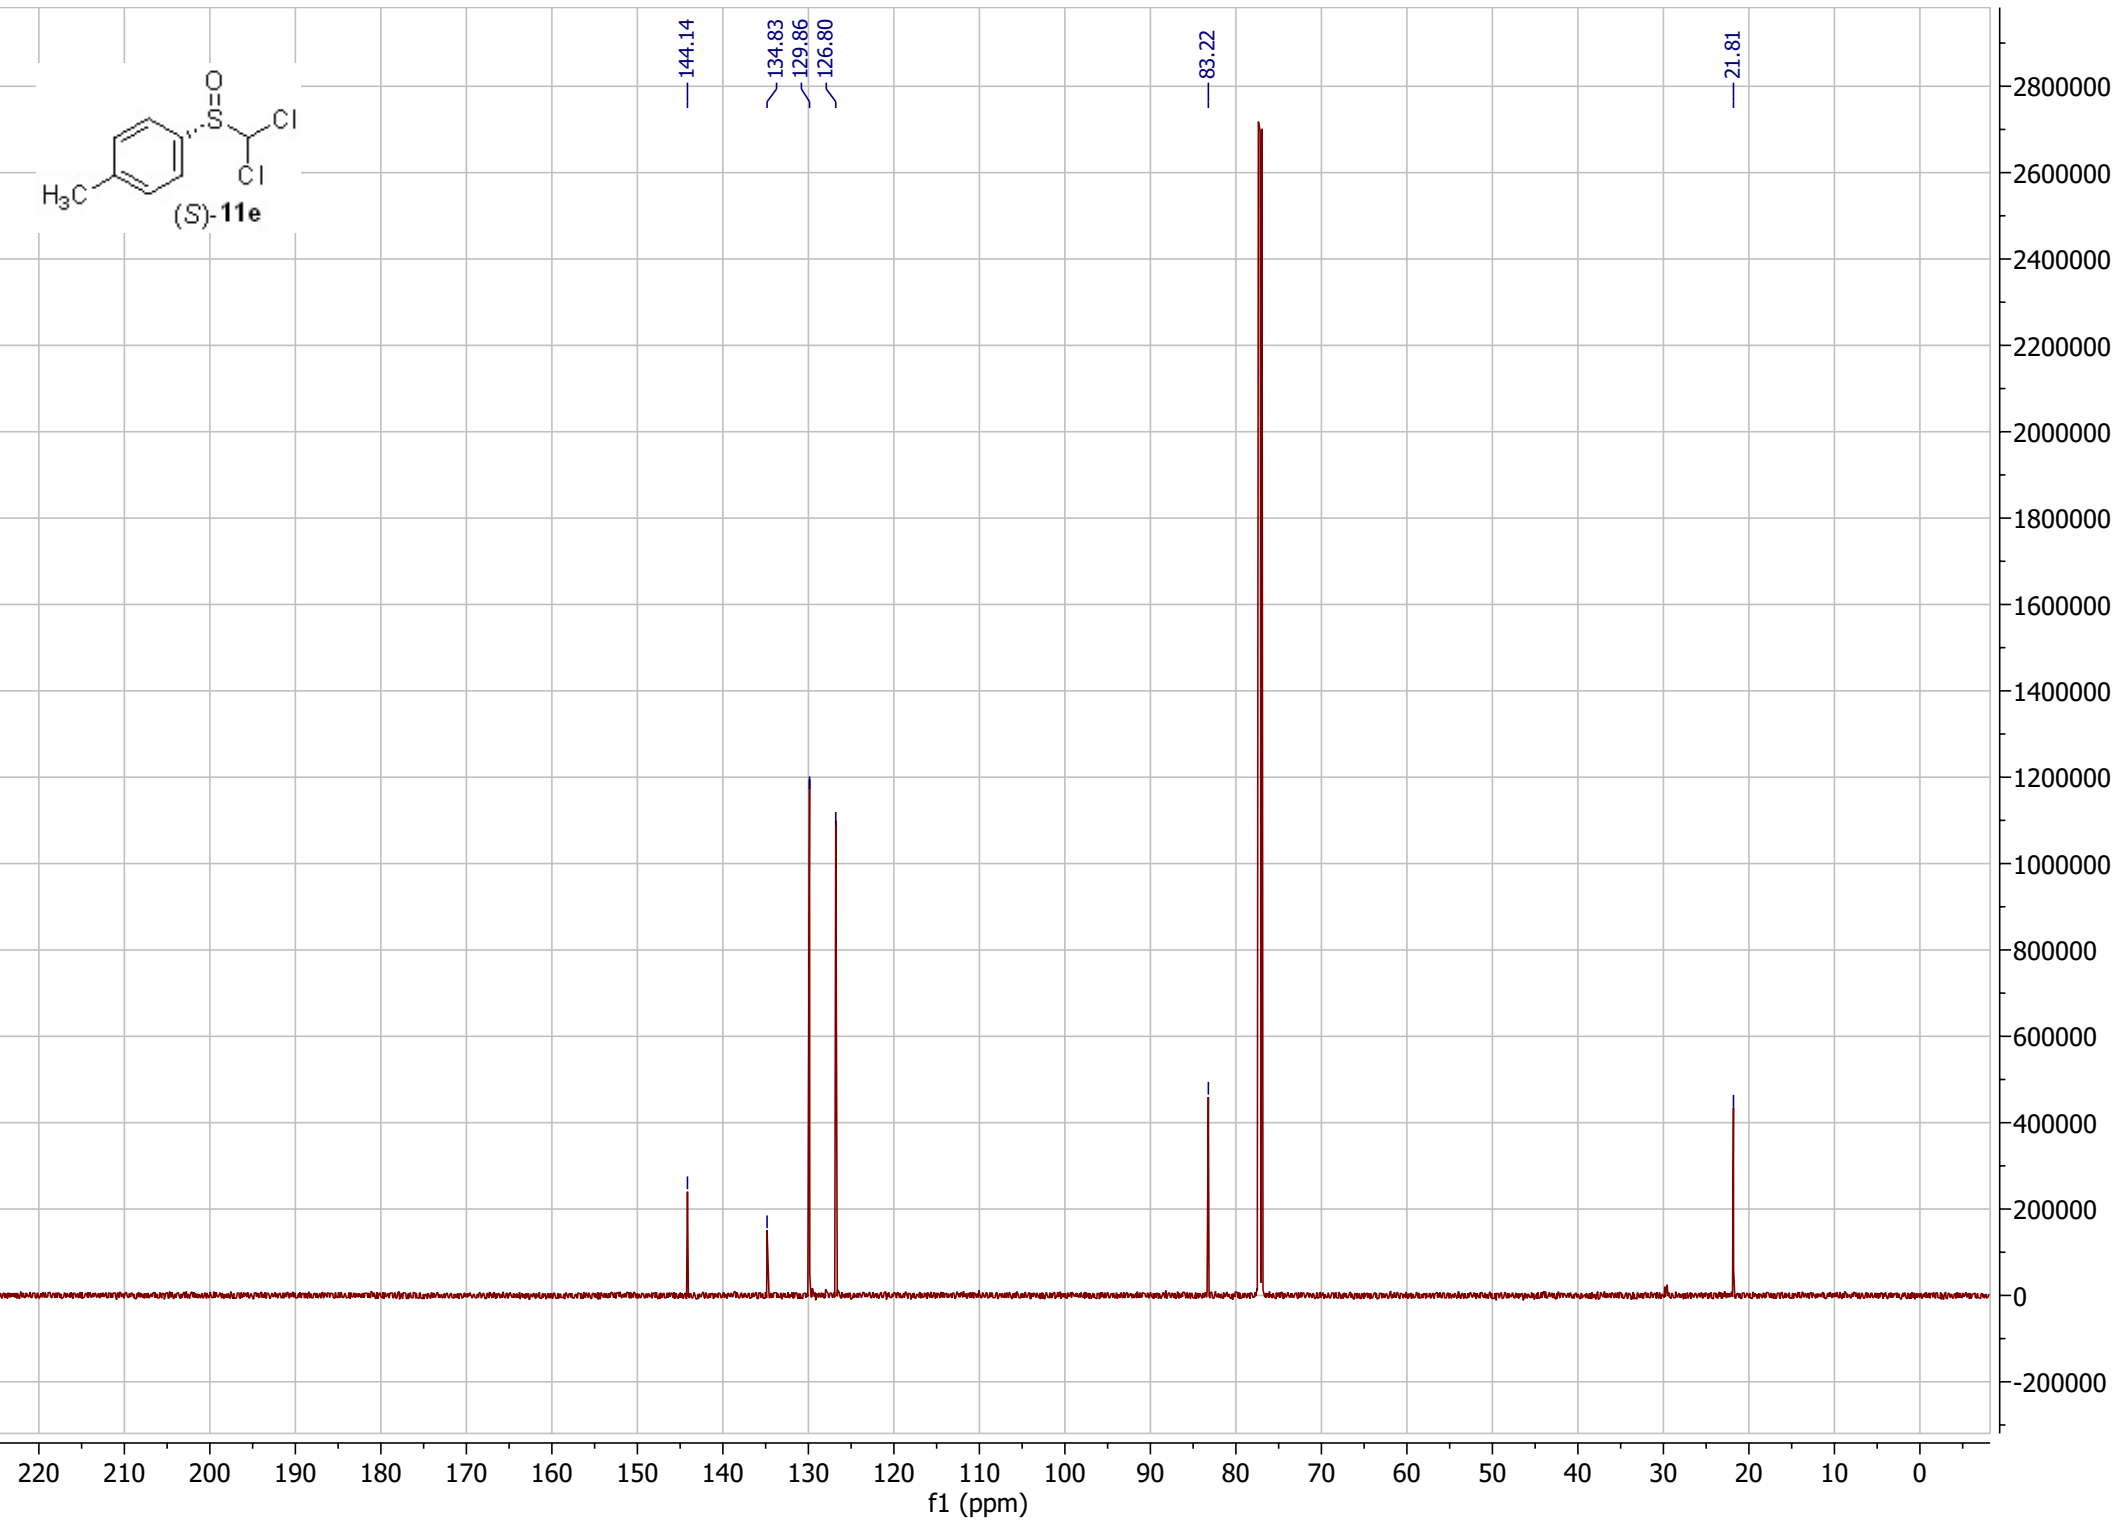

PROTON\_01

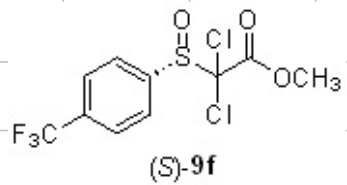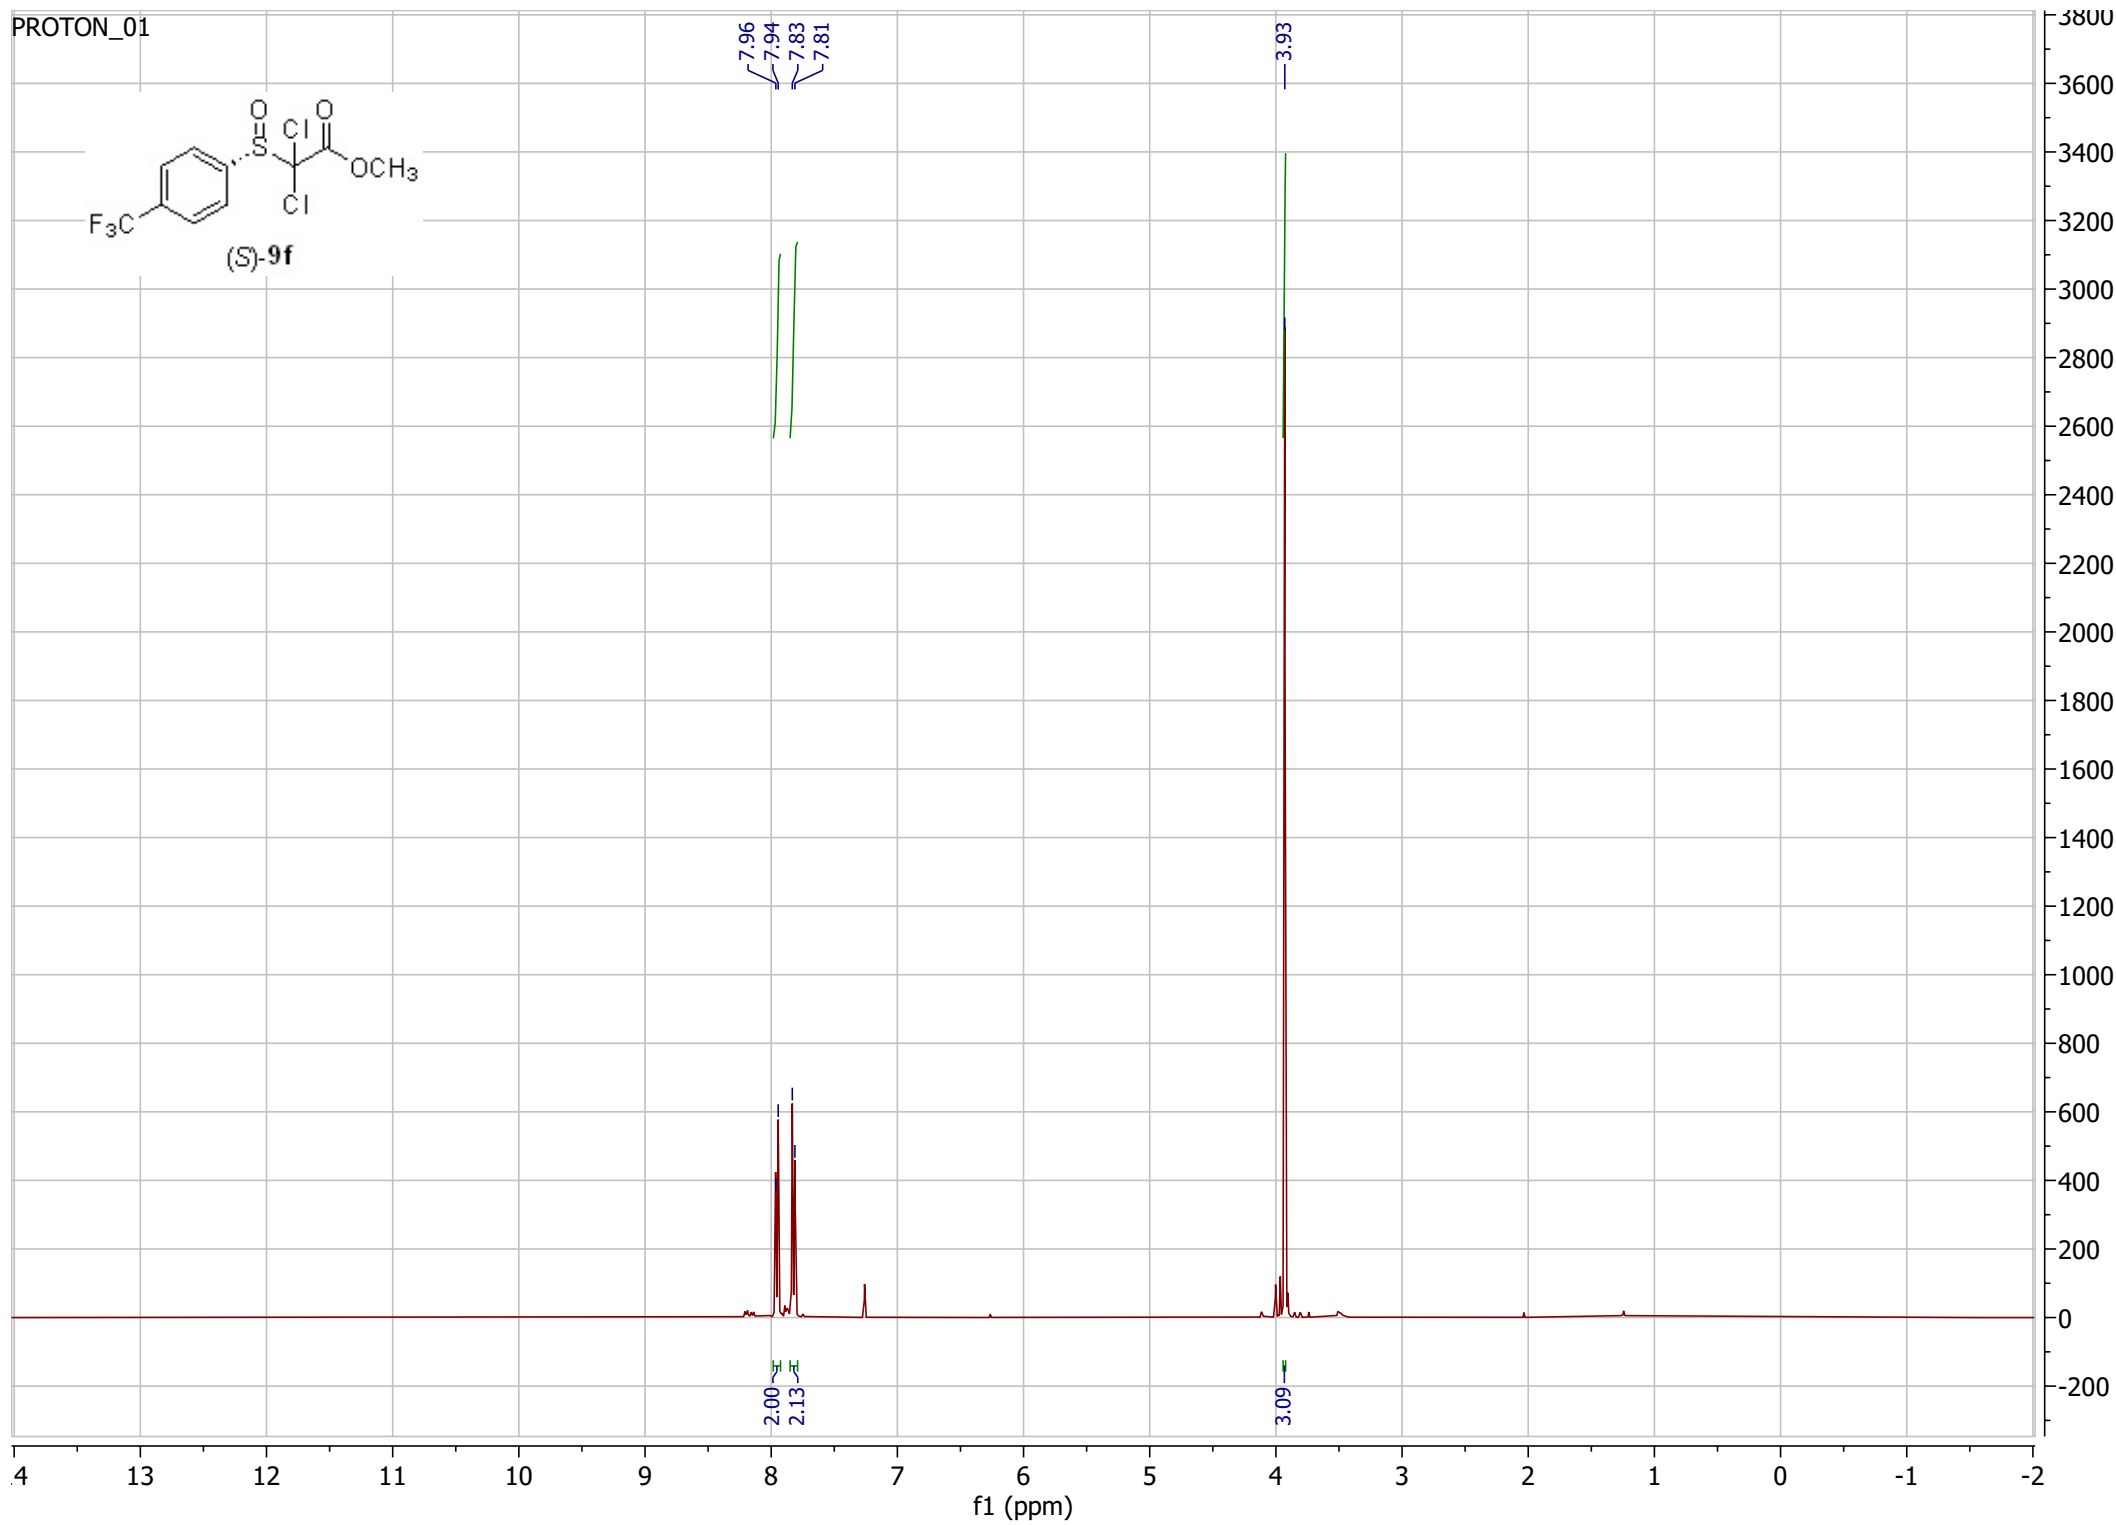

CARBON\_01

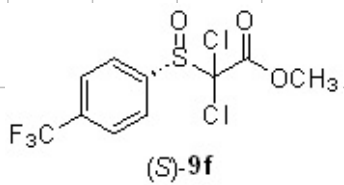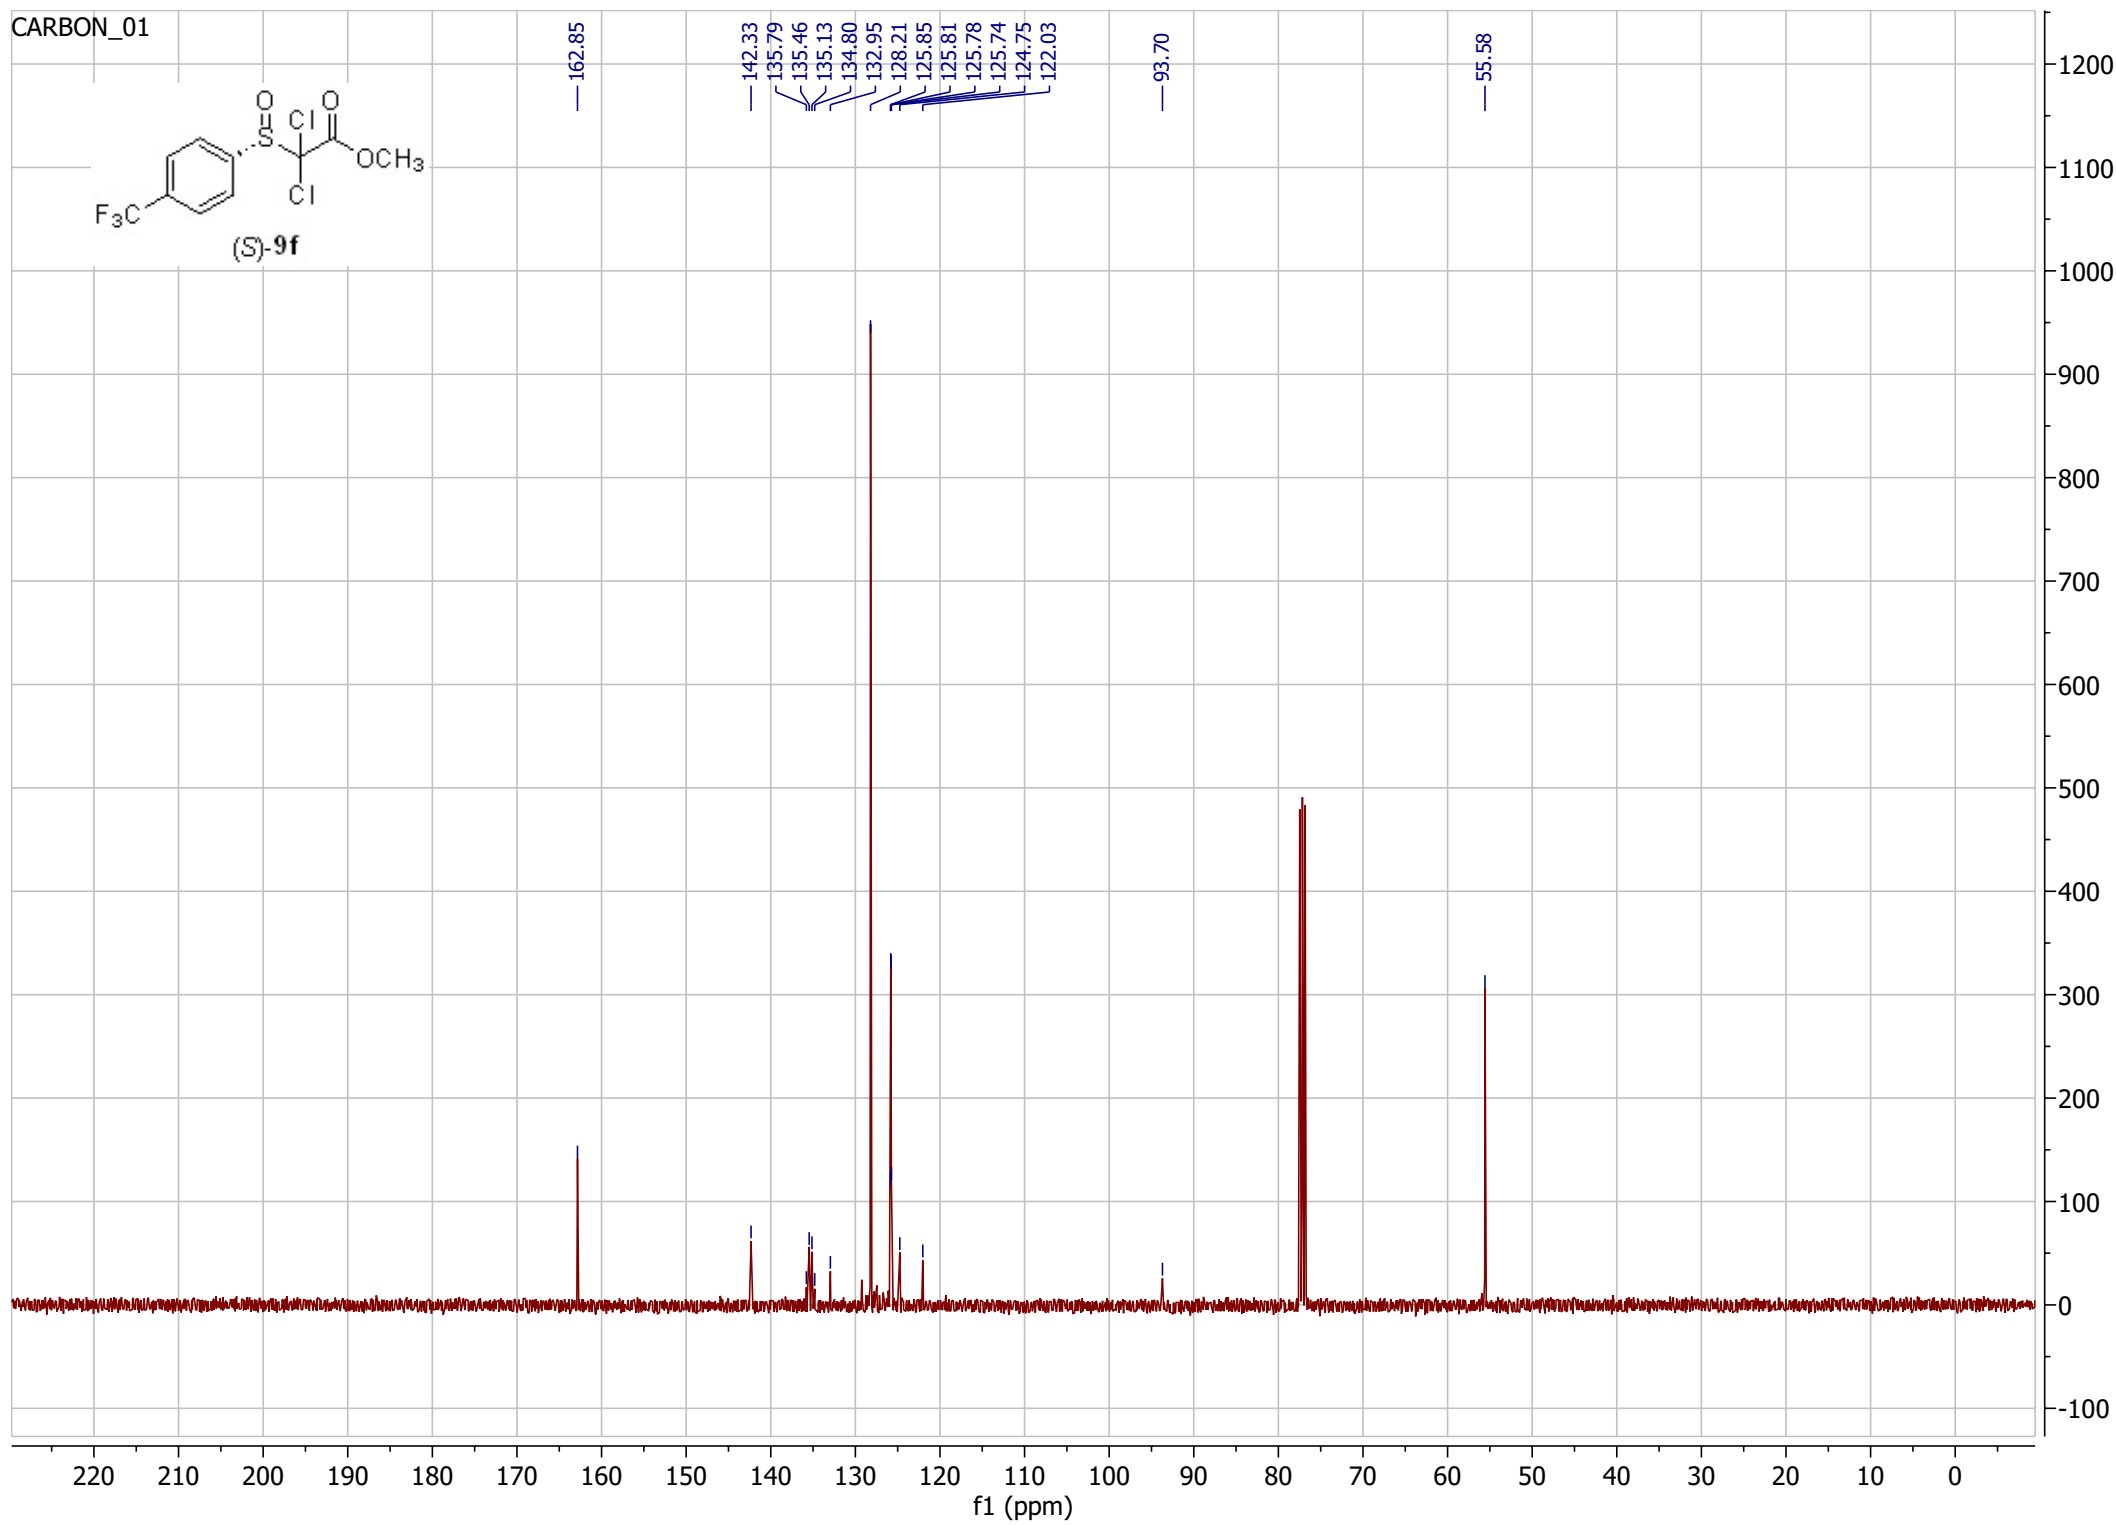



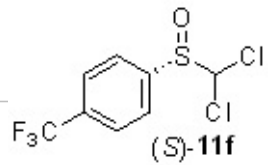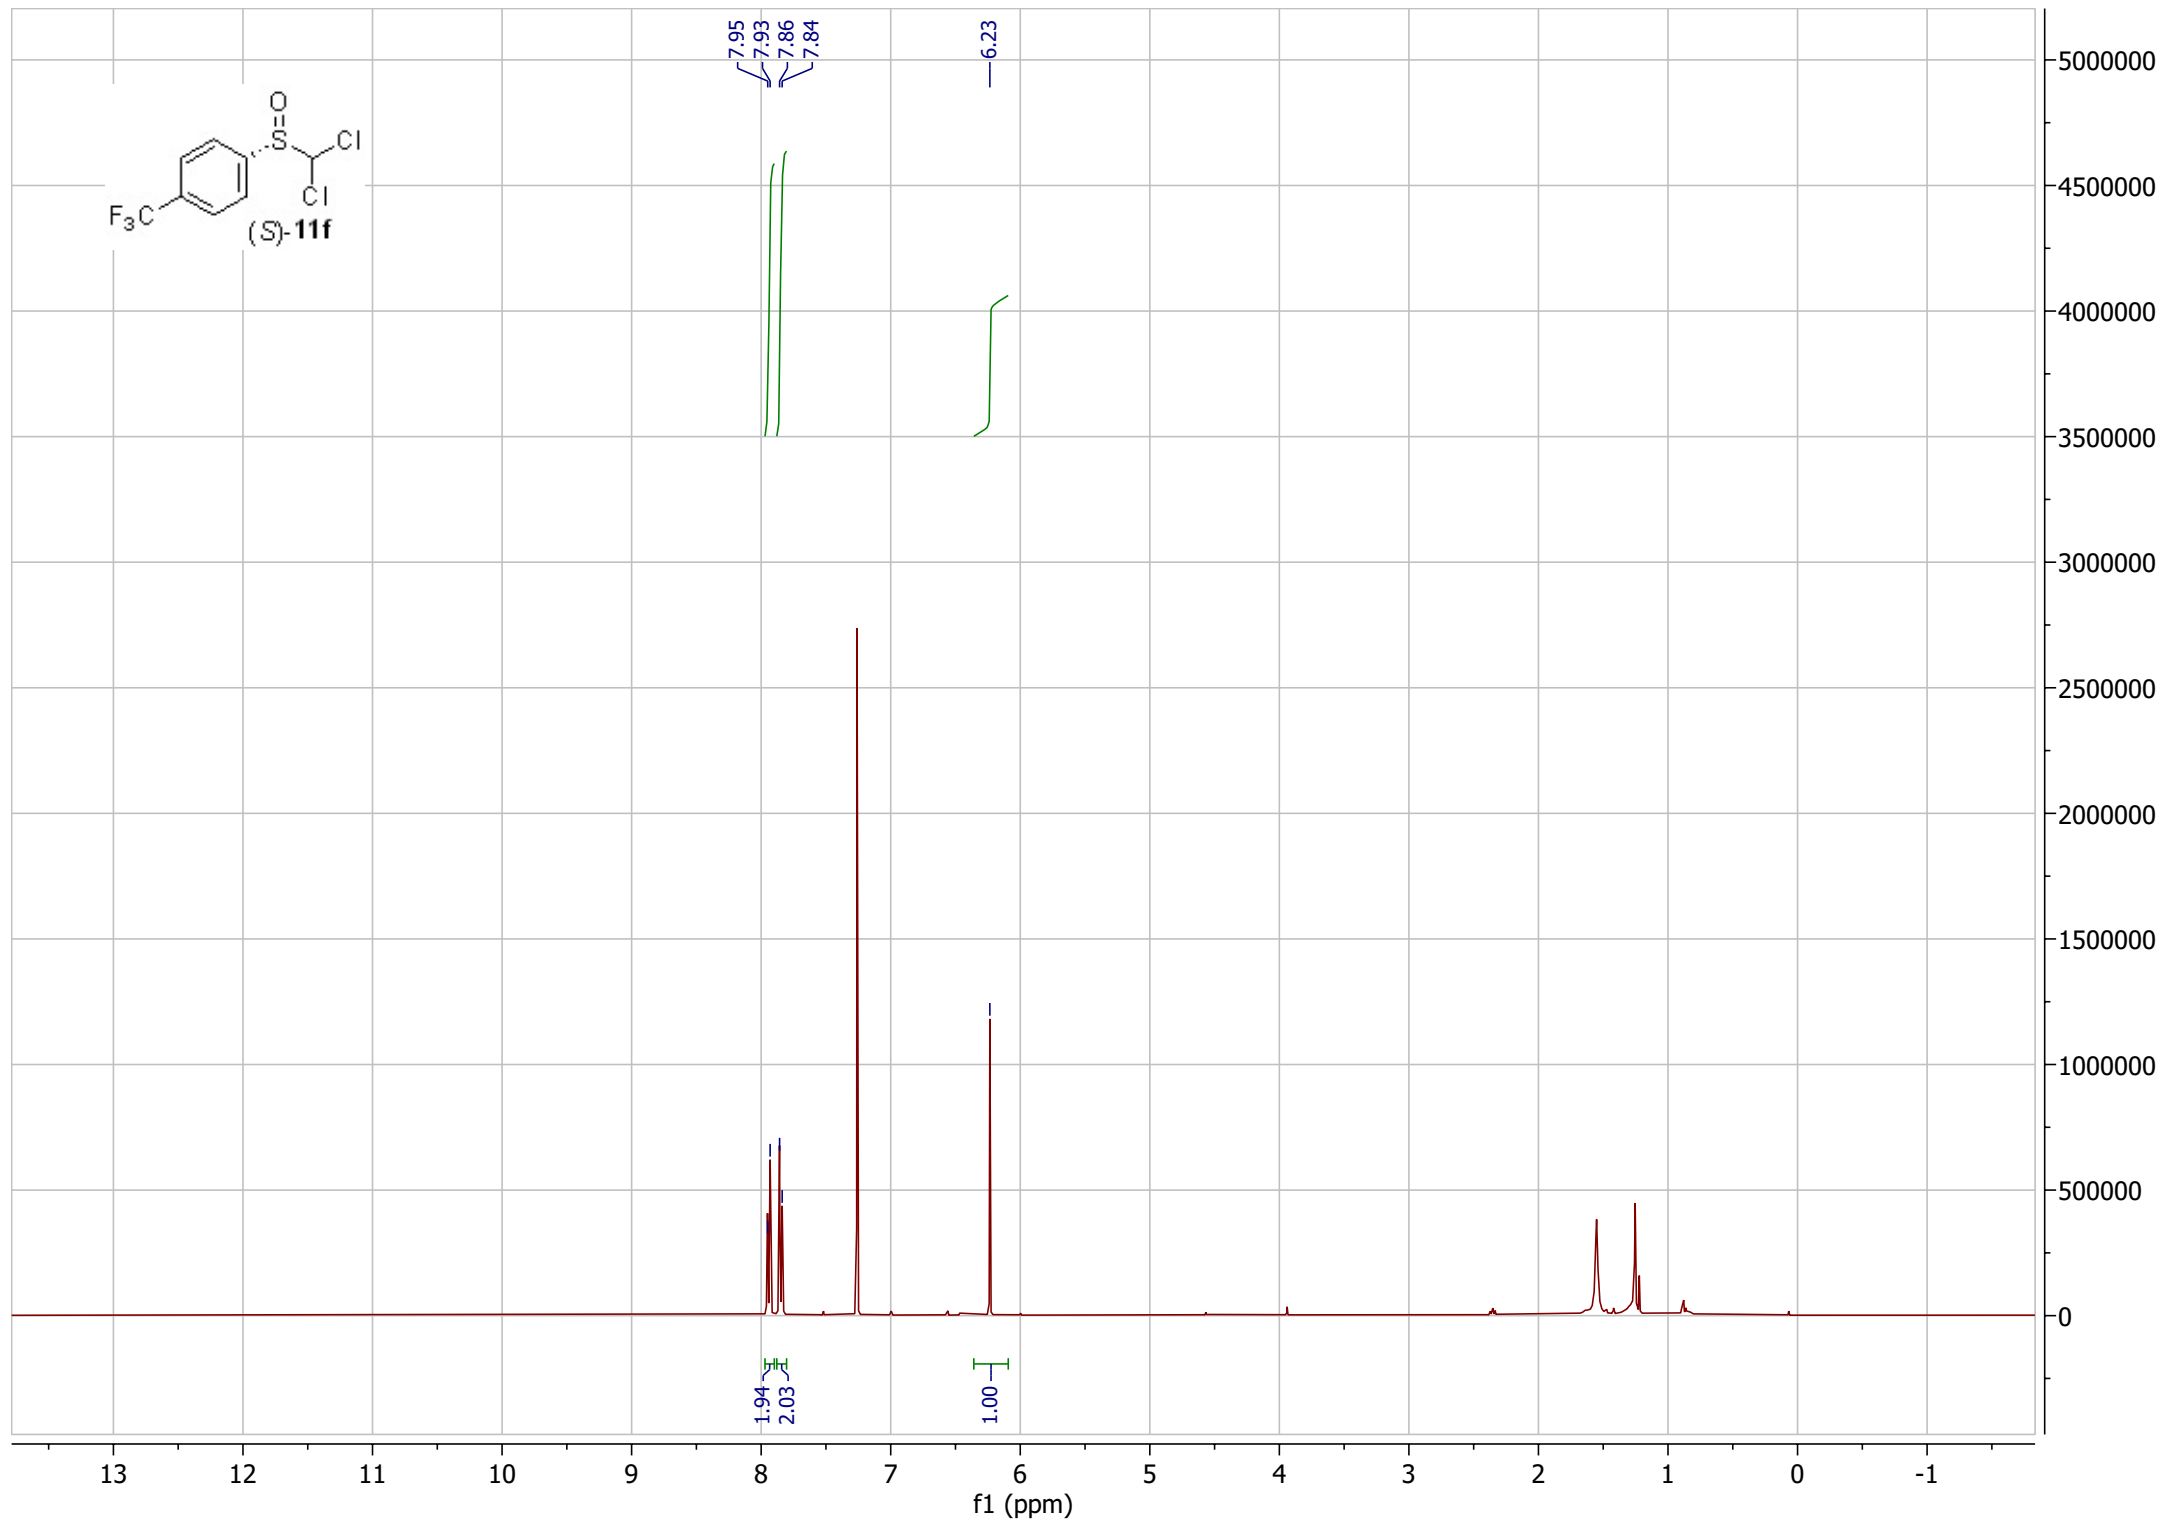

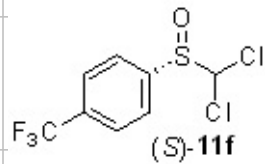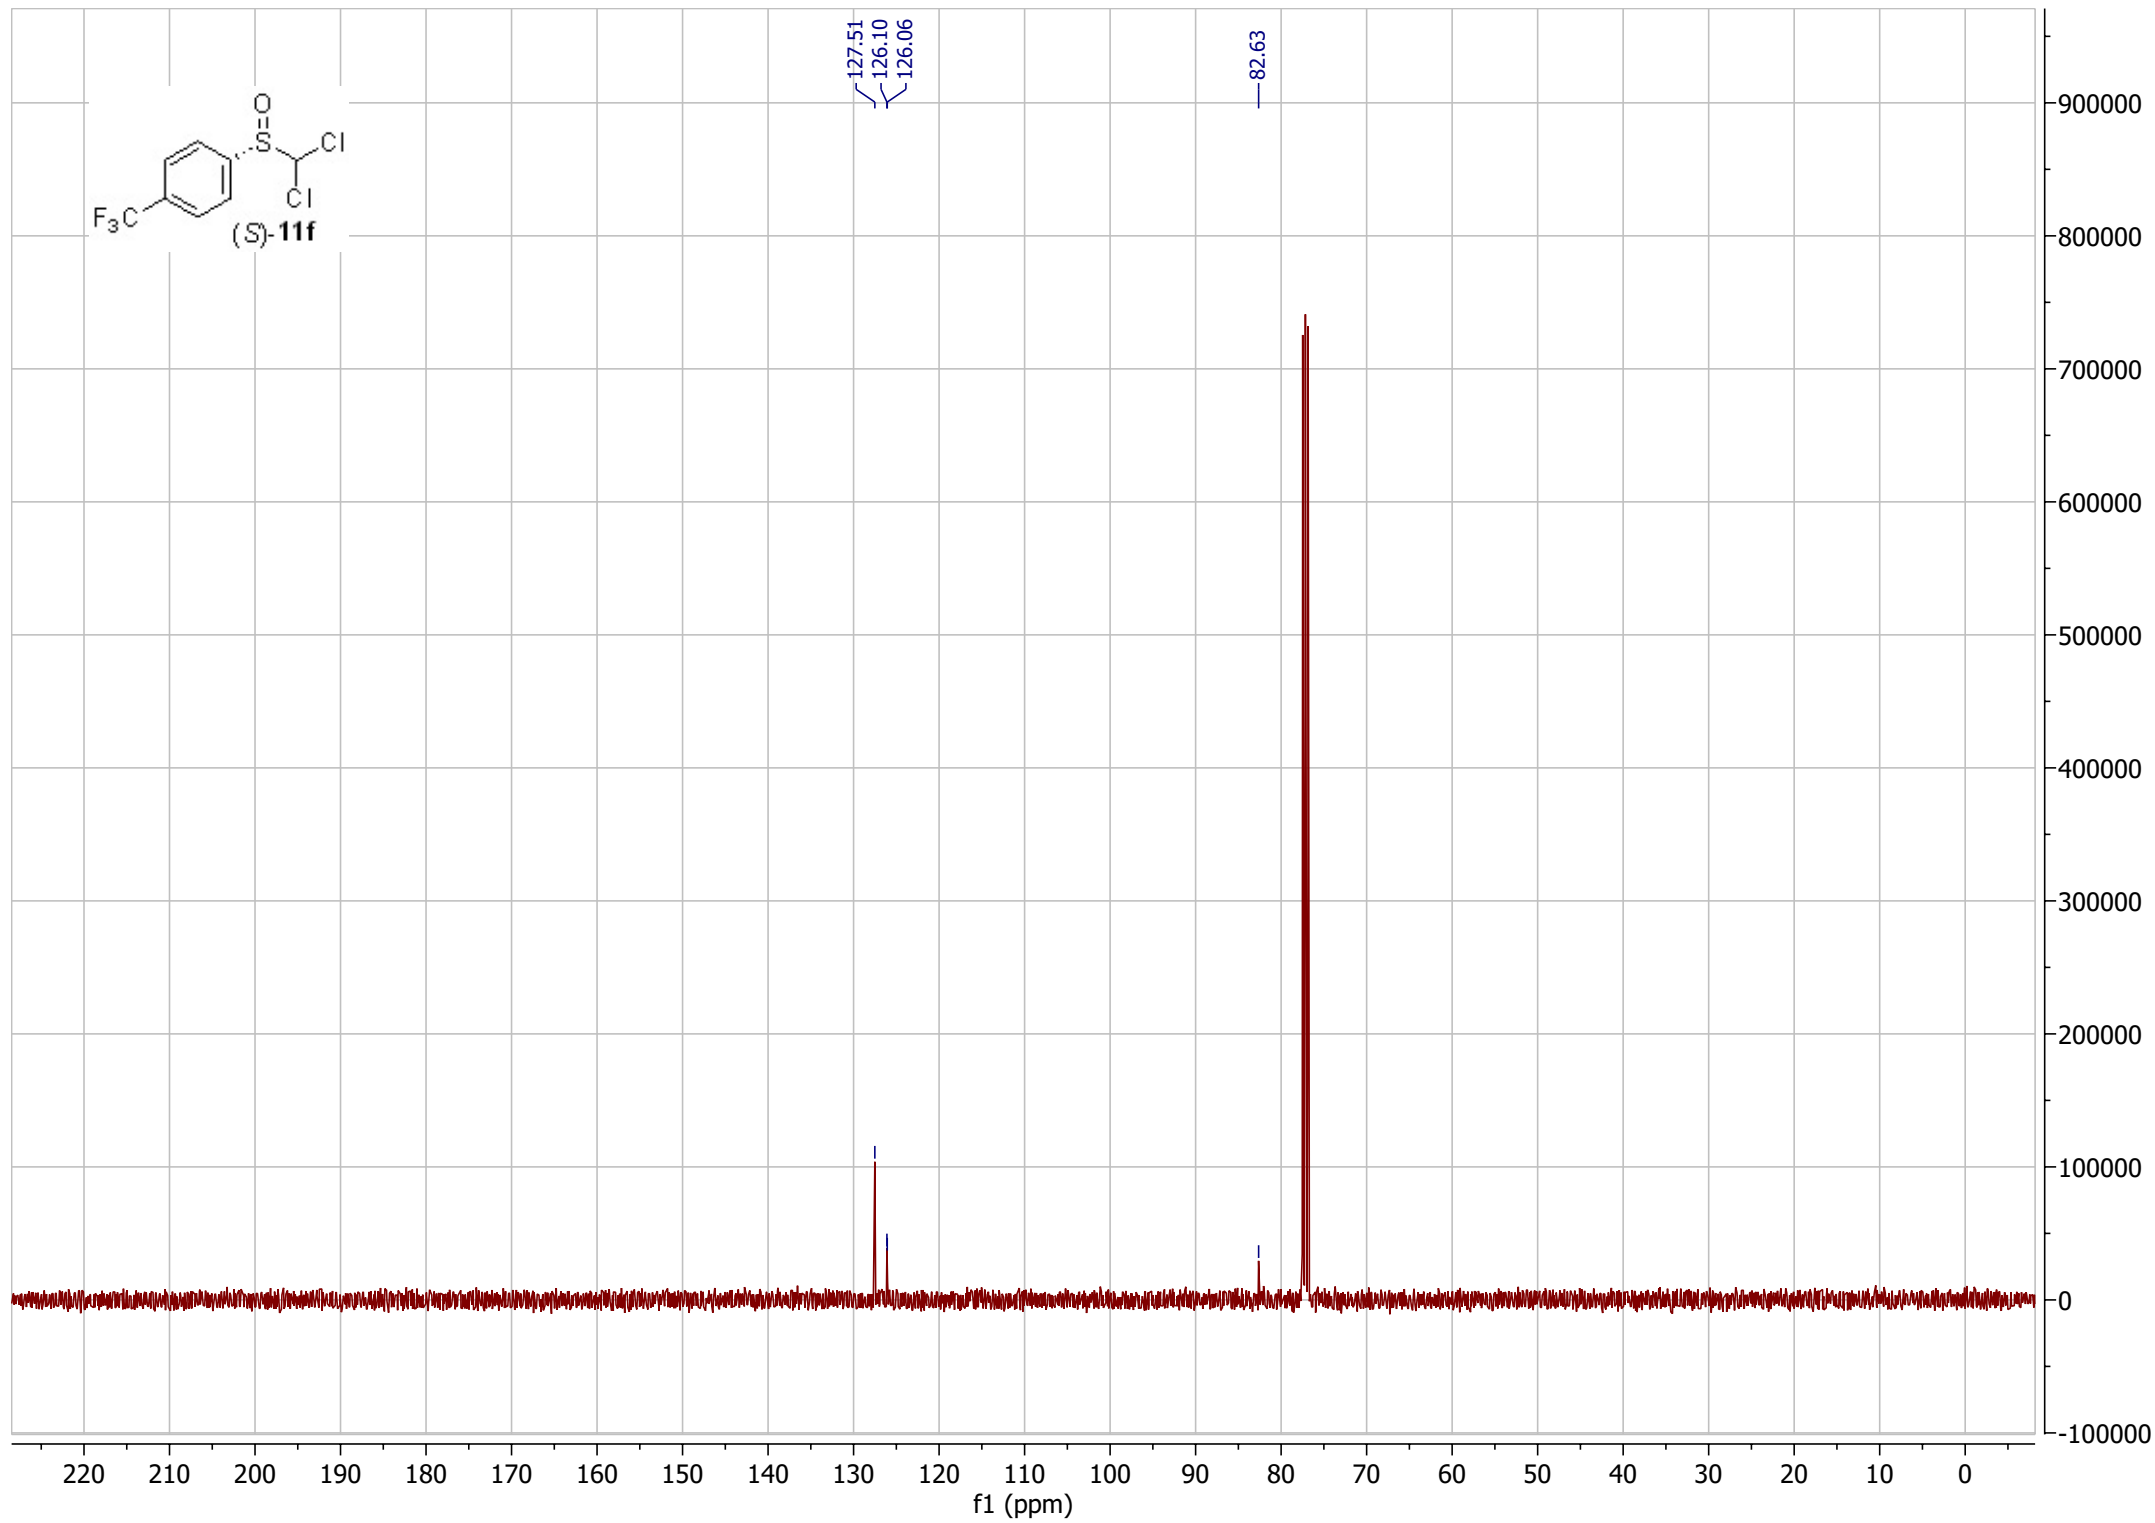

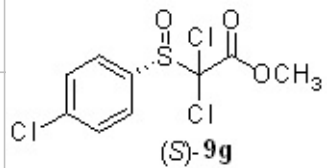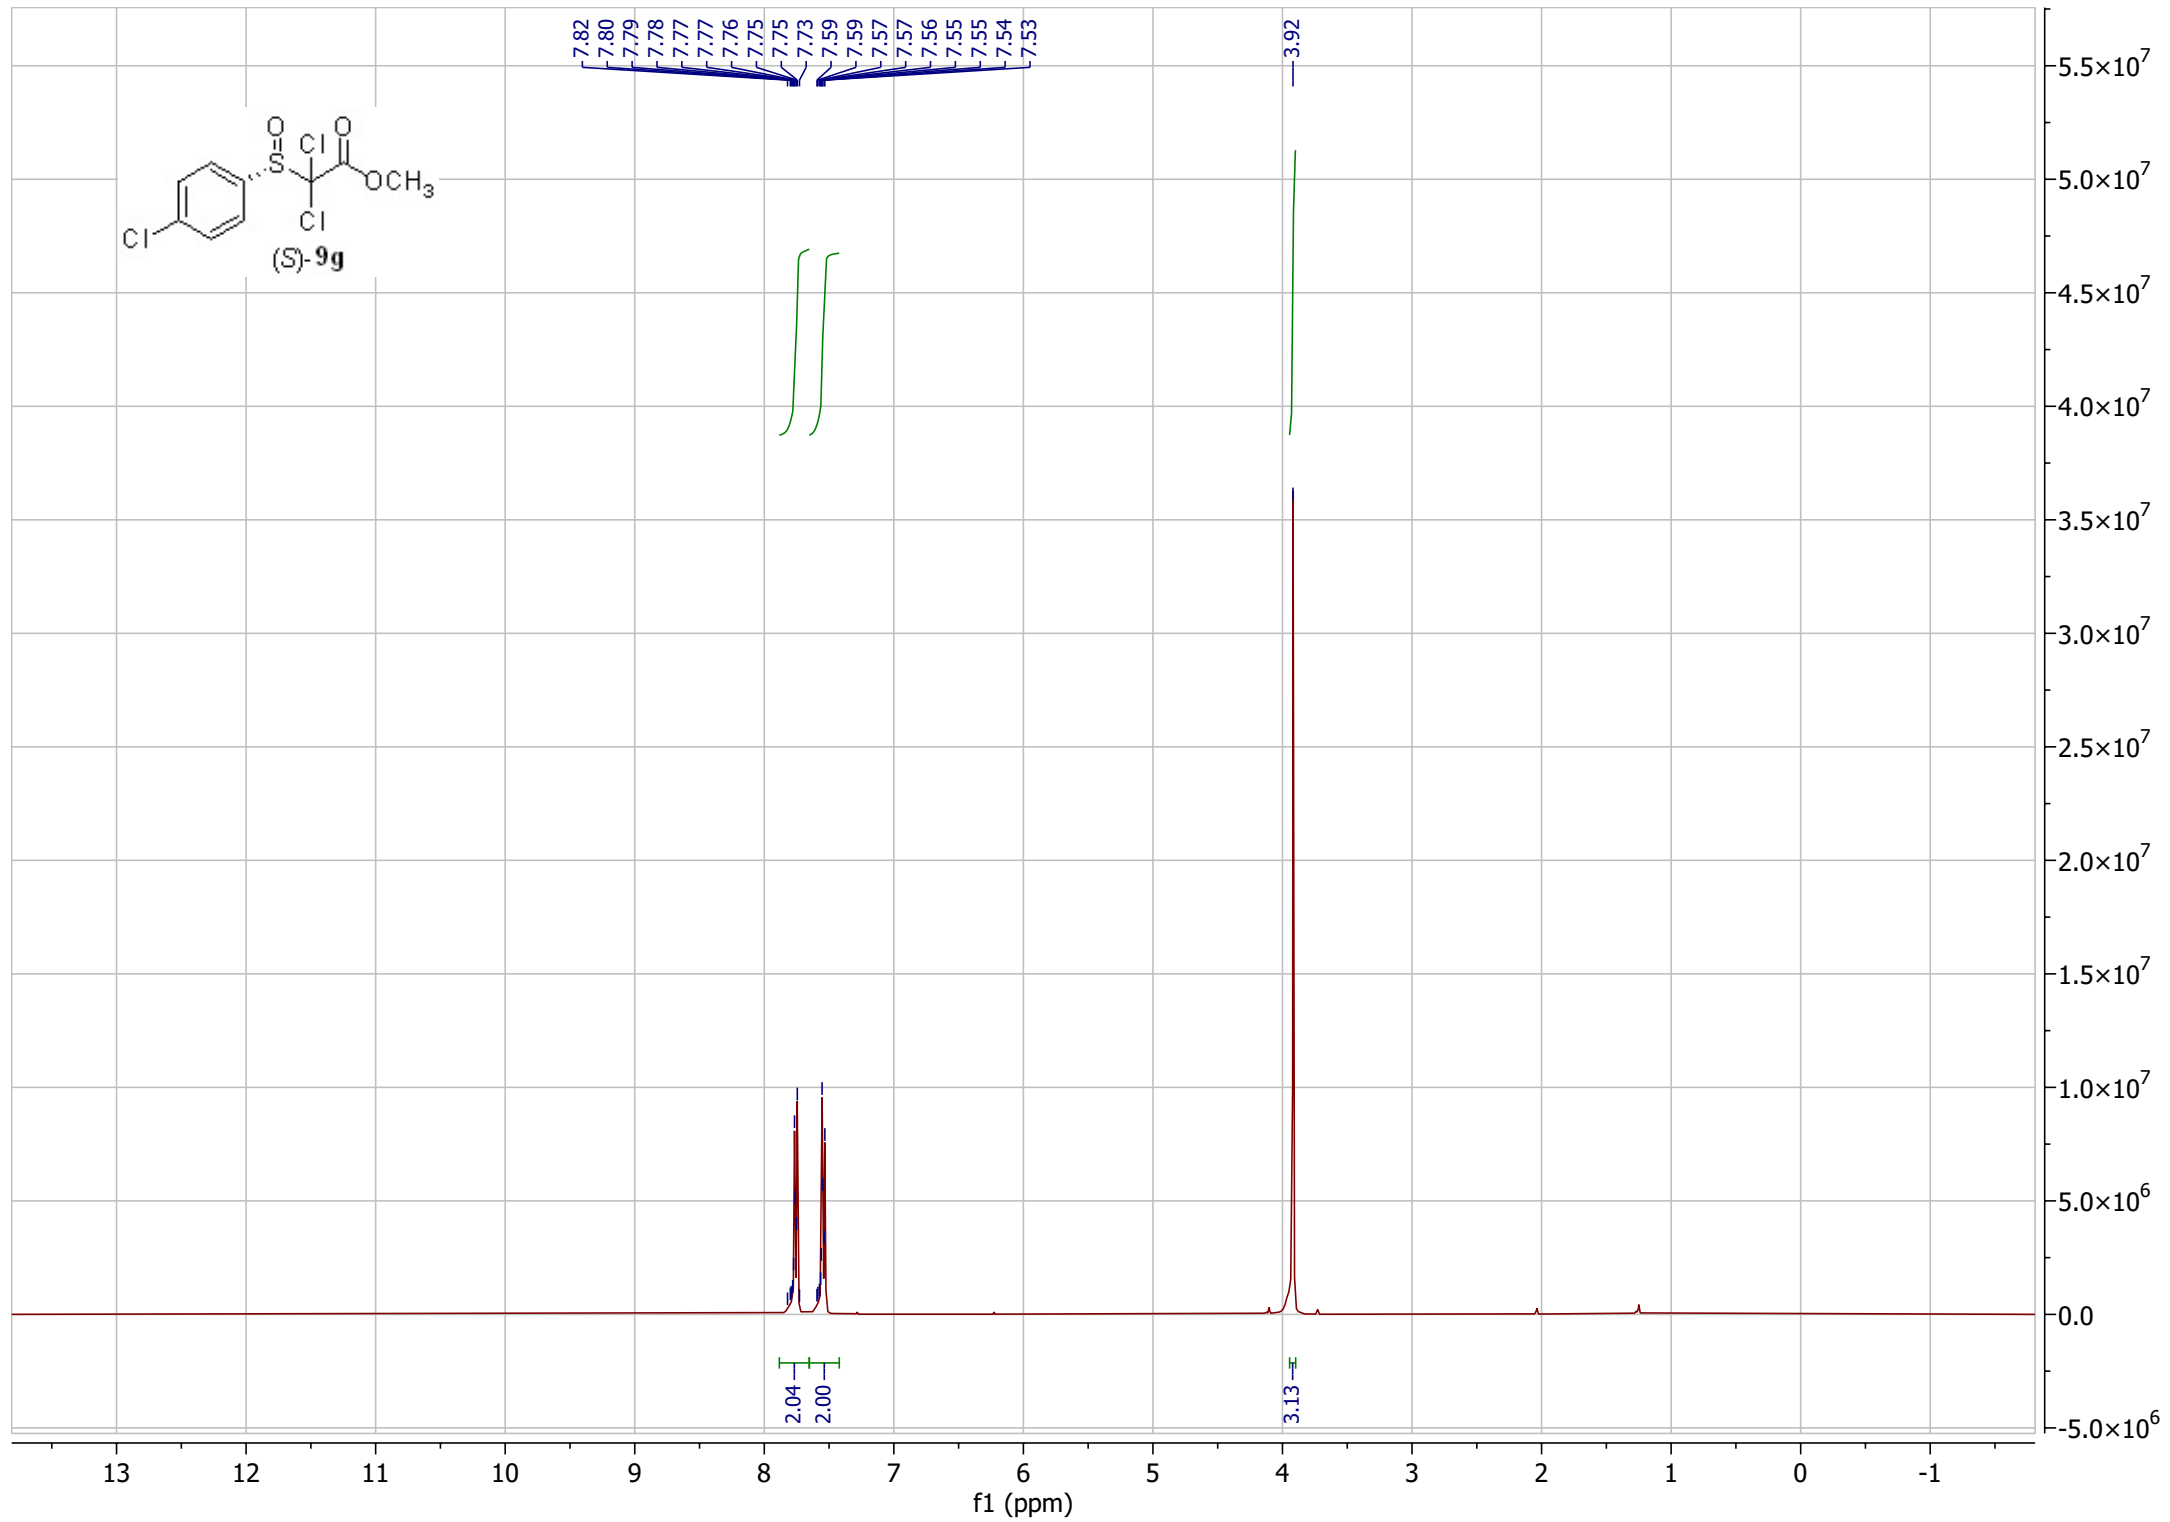

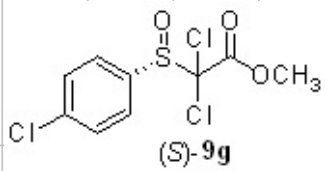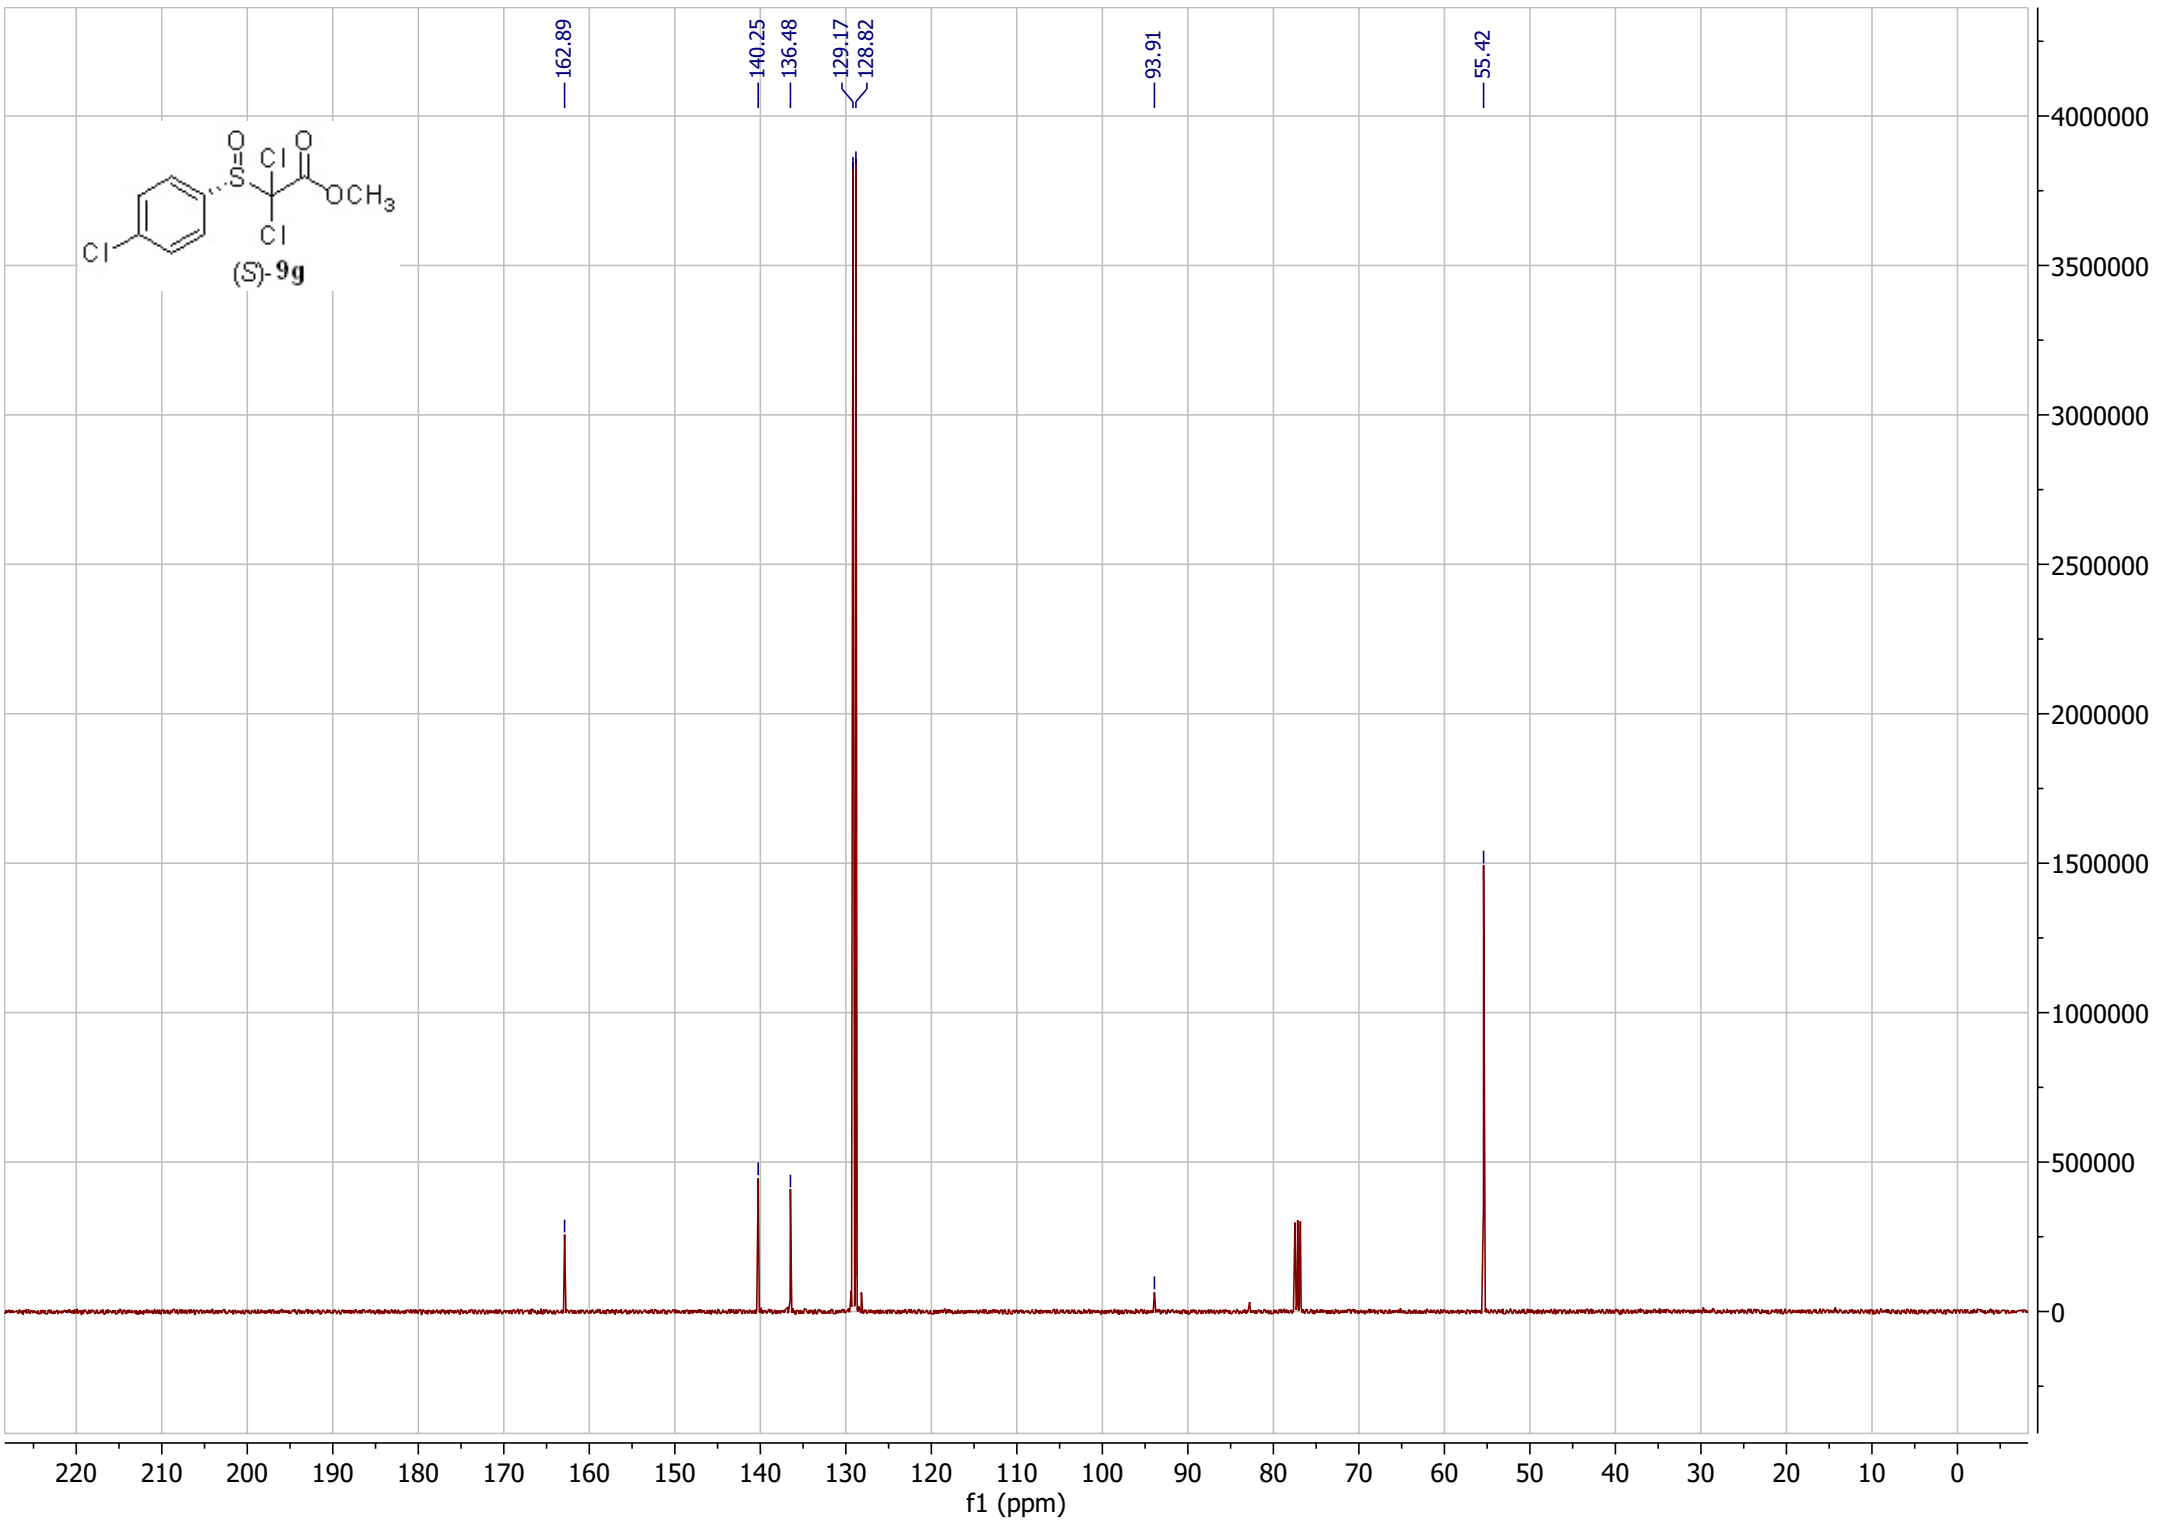

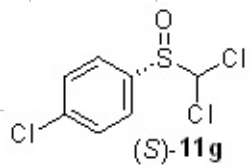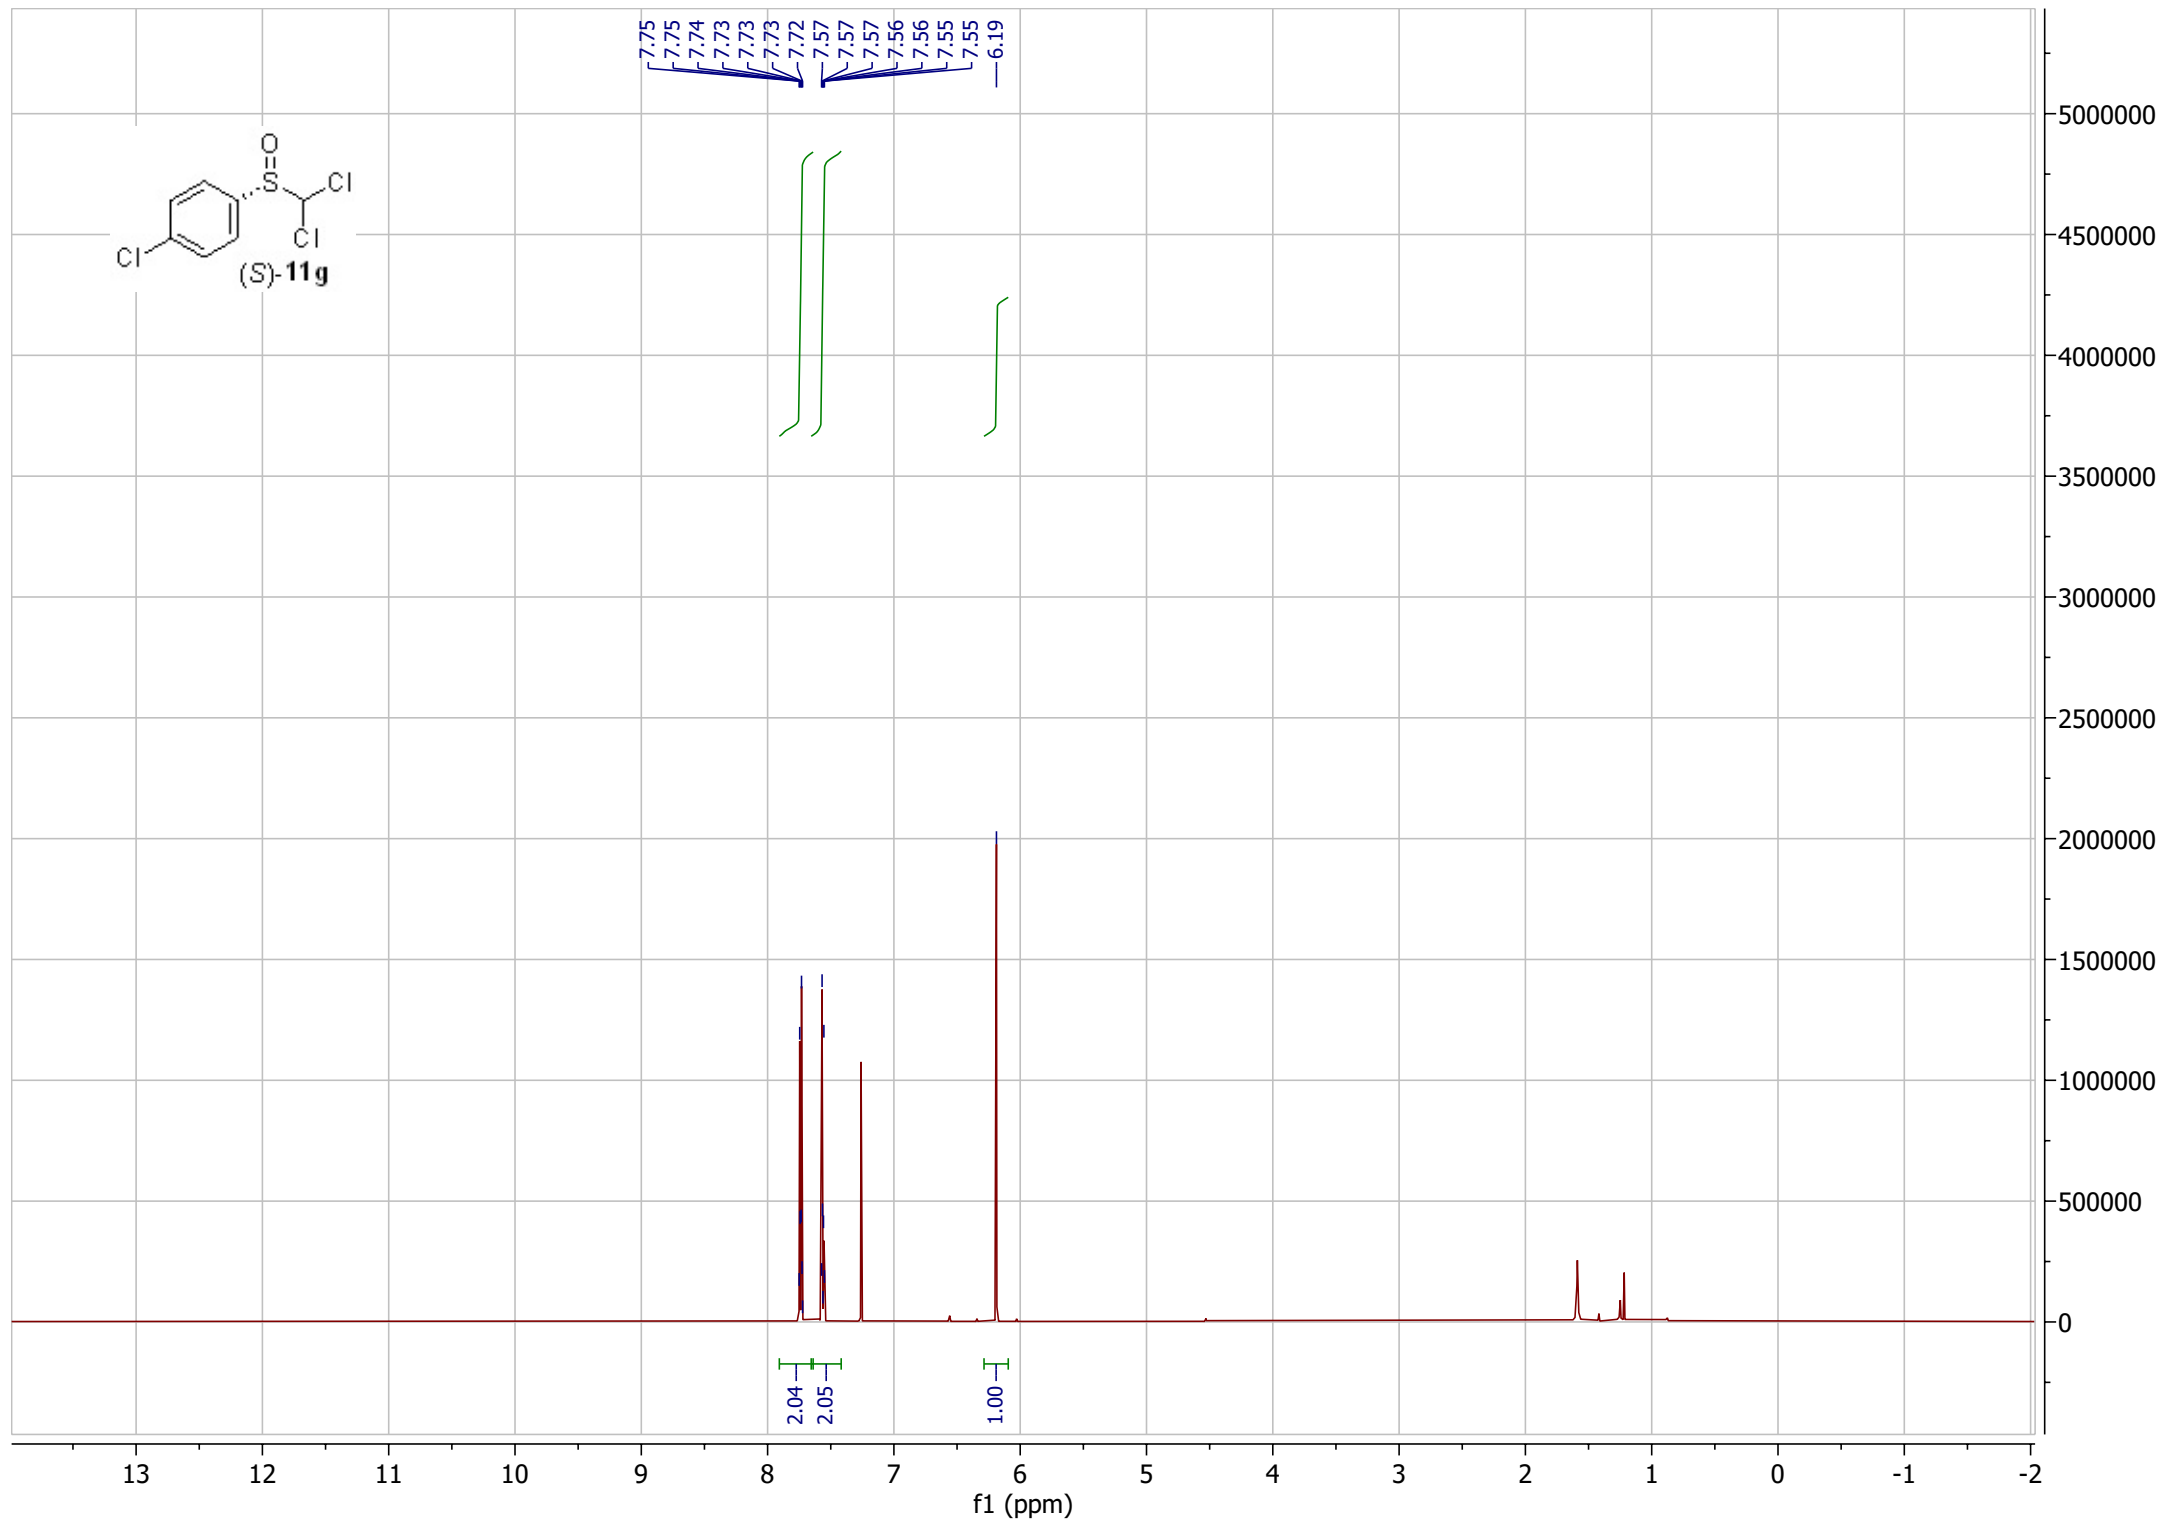

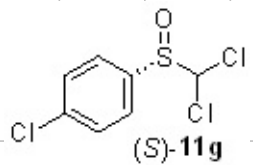

— 139.87  
— 136.19  
— 129.47  
— 128.28

— 82.75

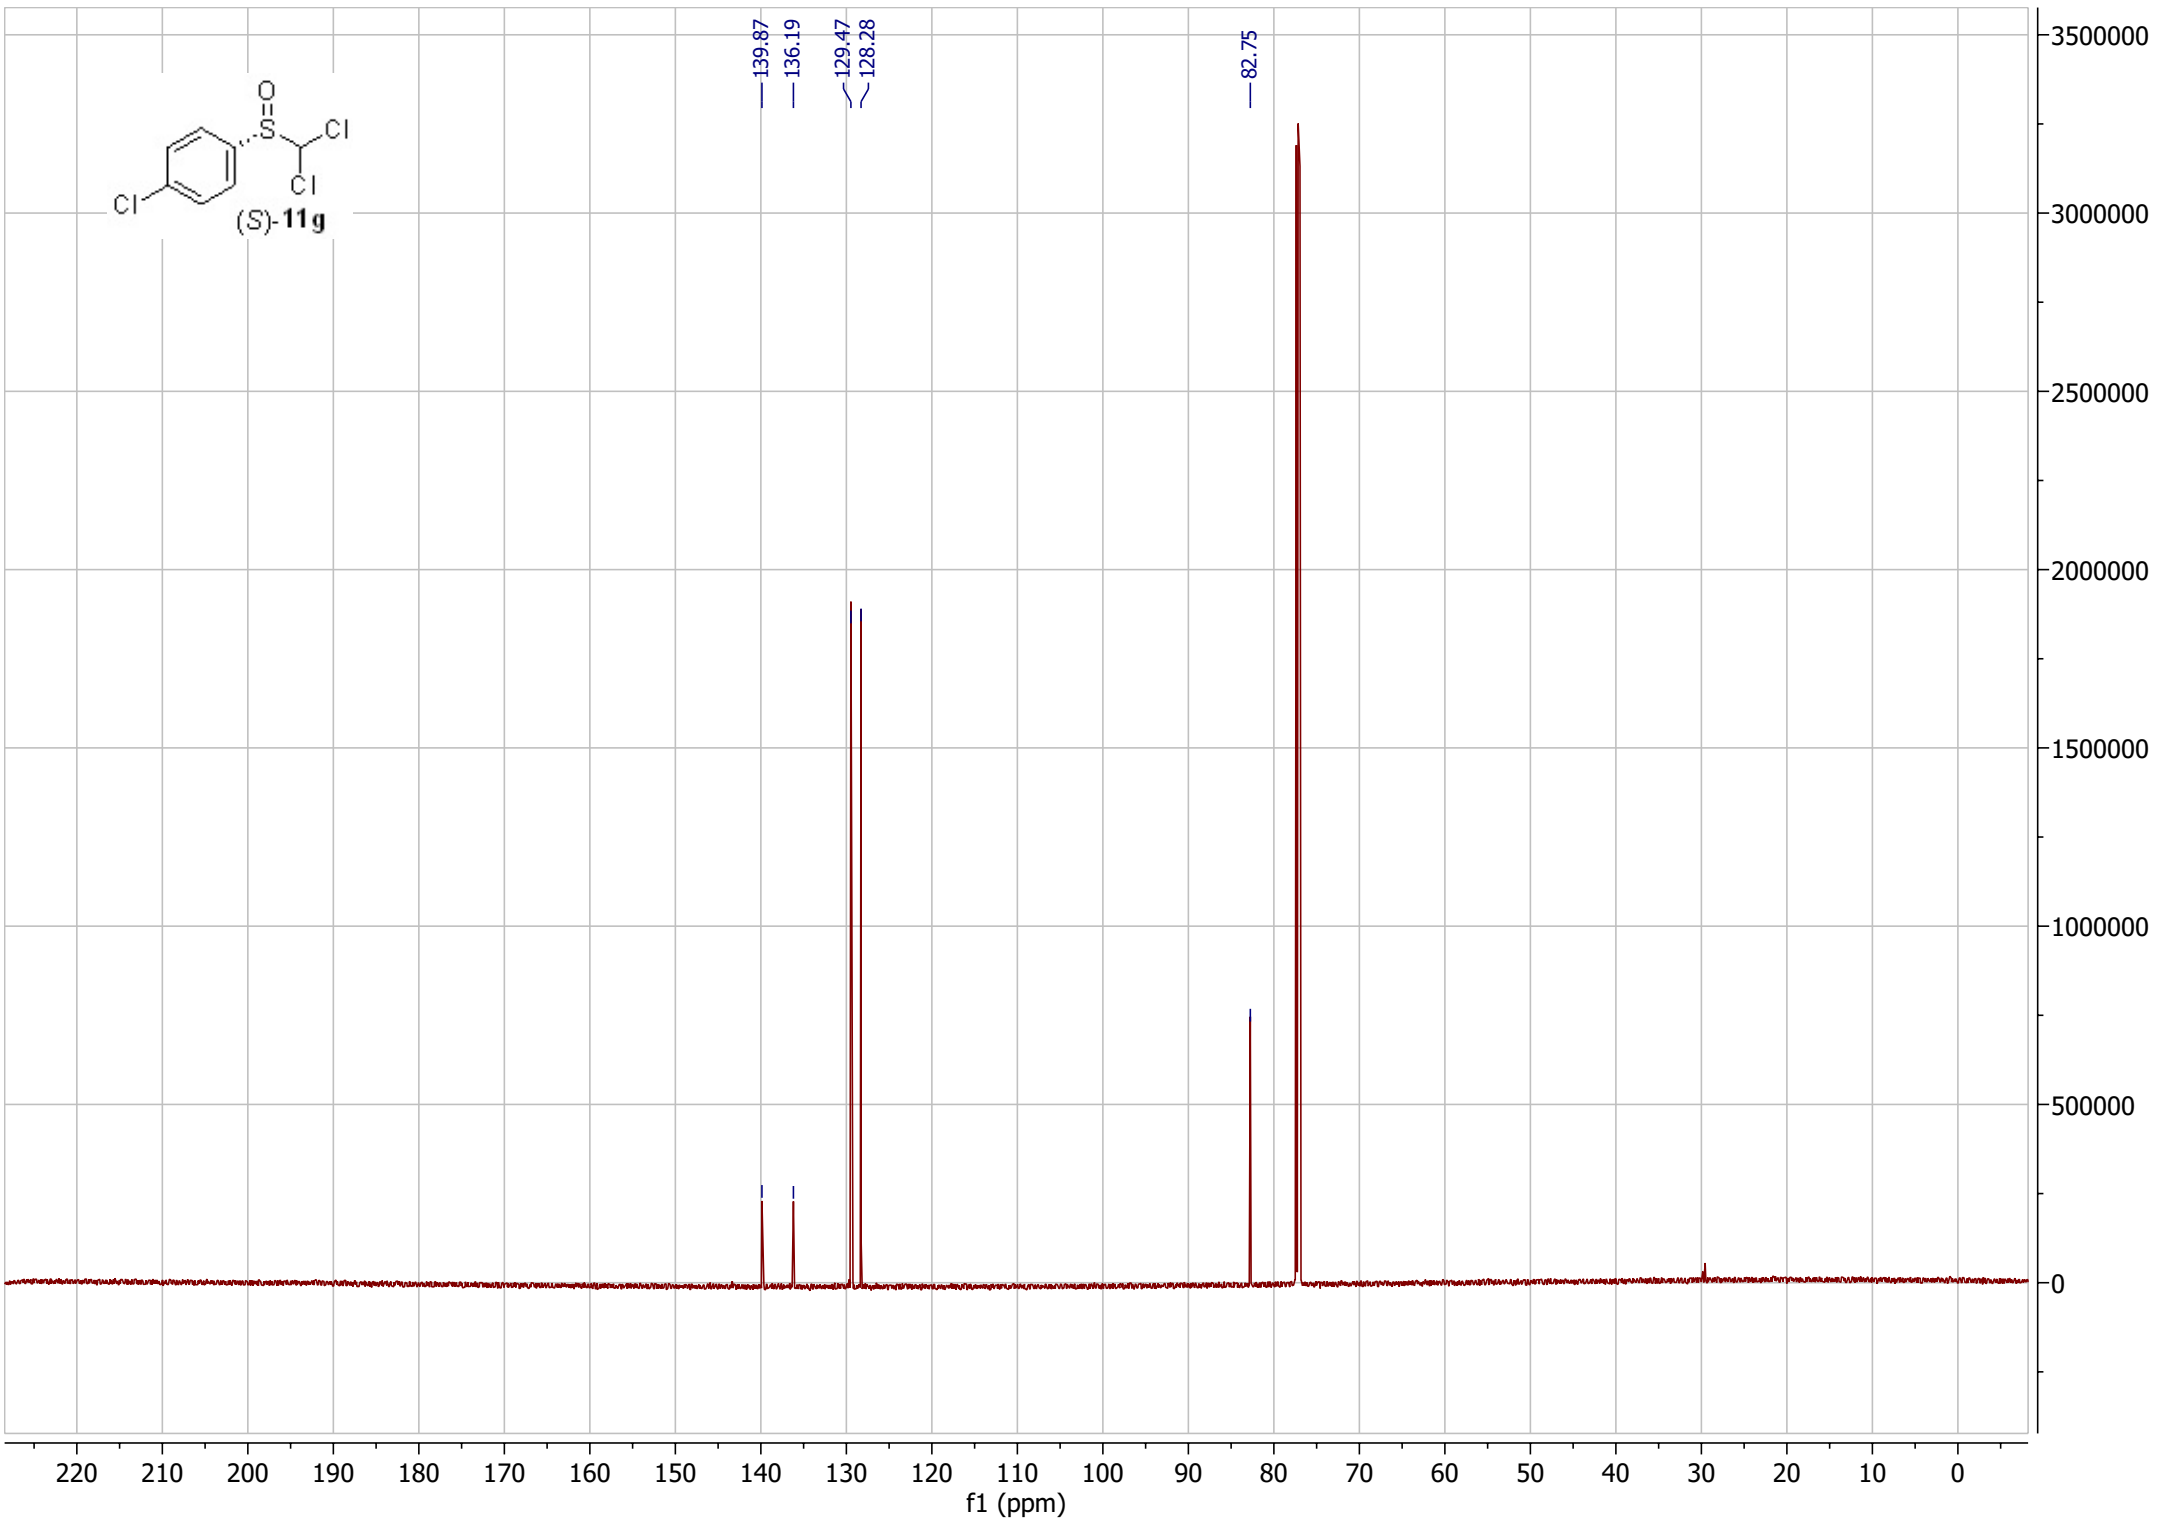

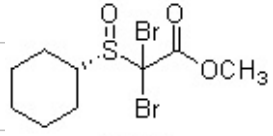

(S)-10a

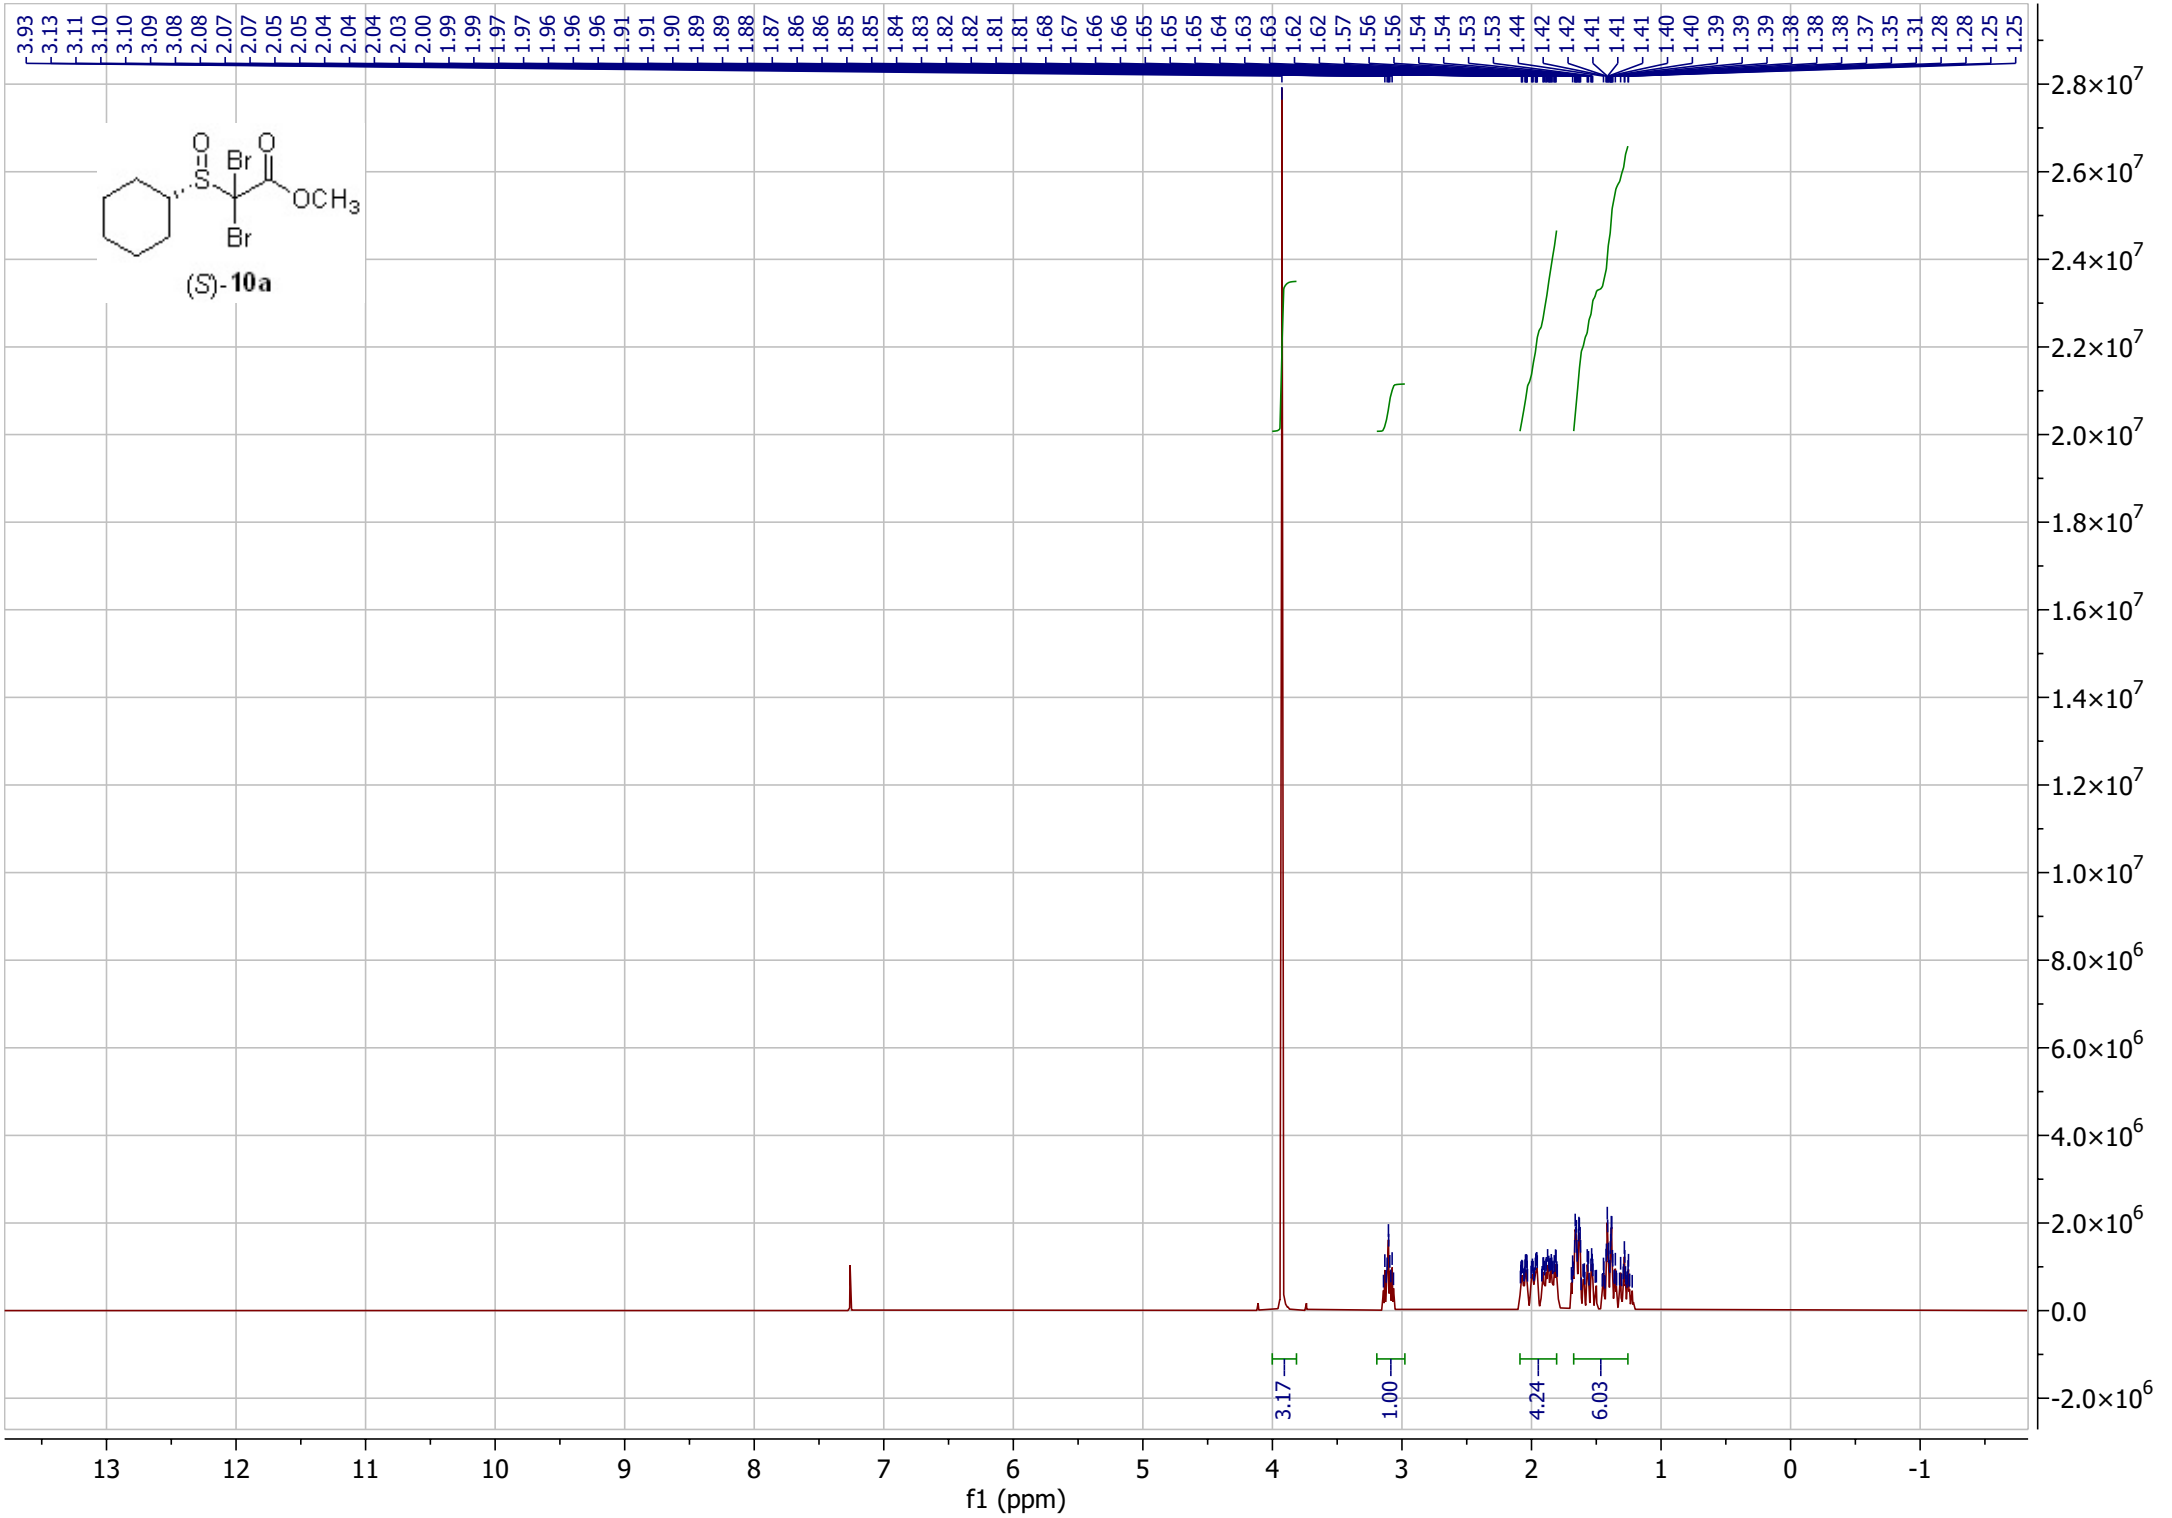

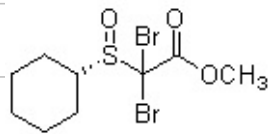

(S)-10a

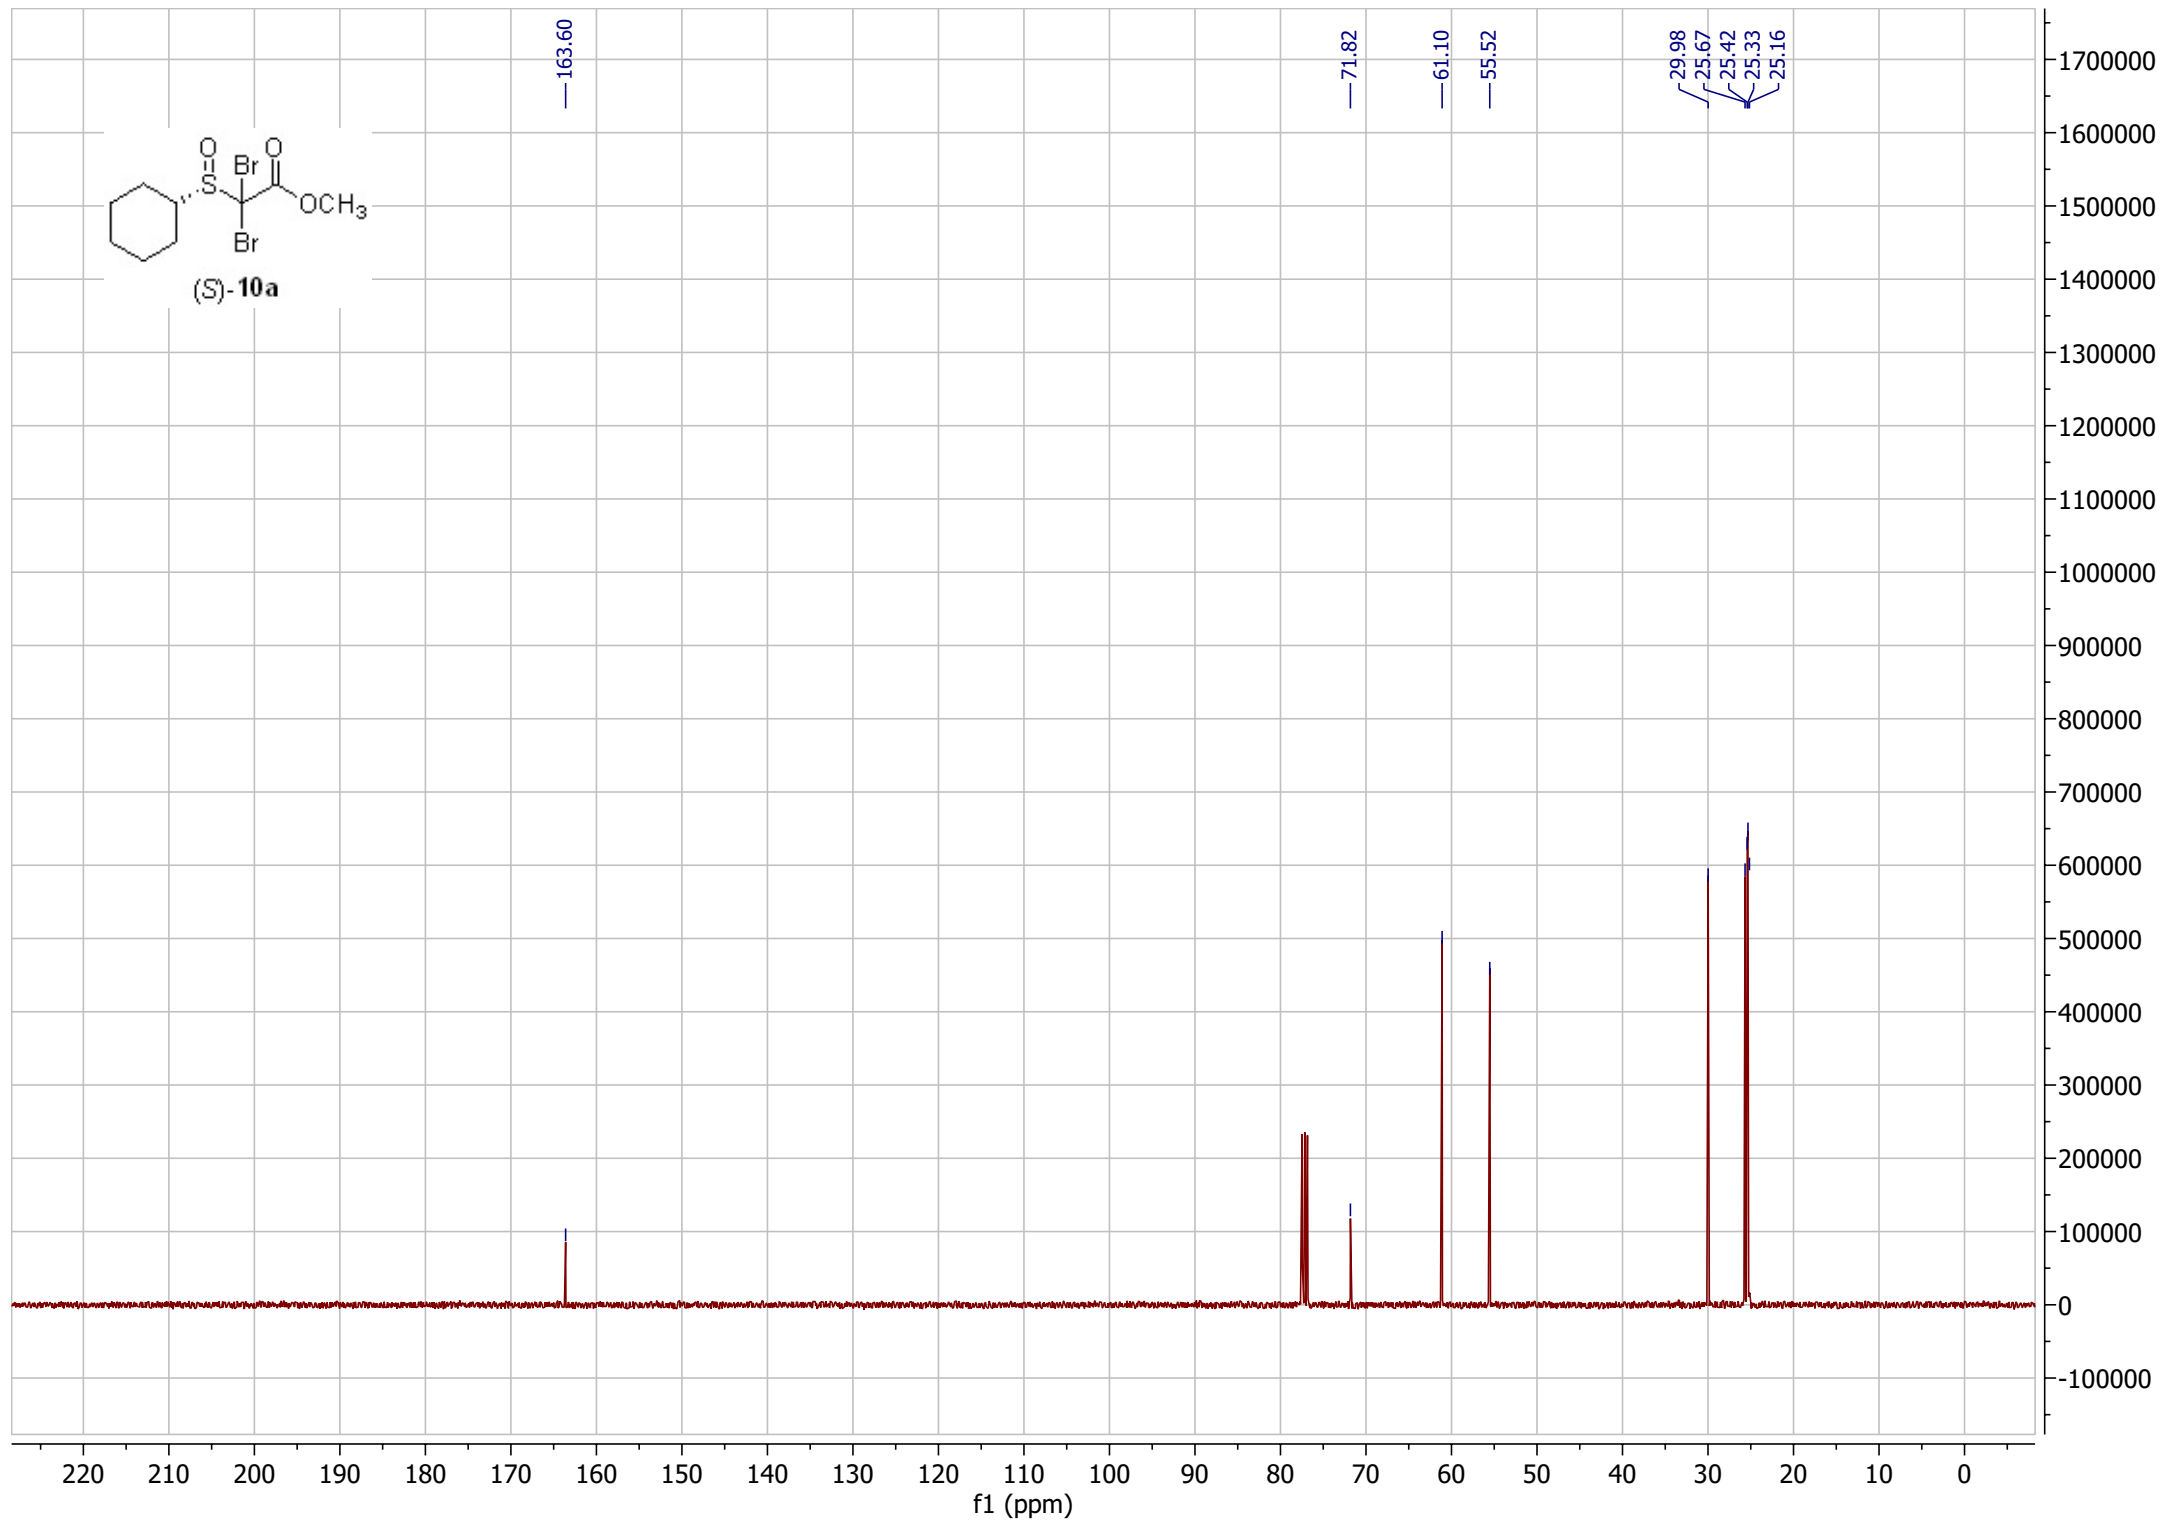



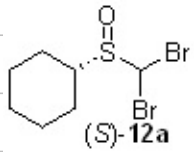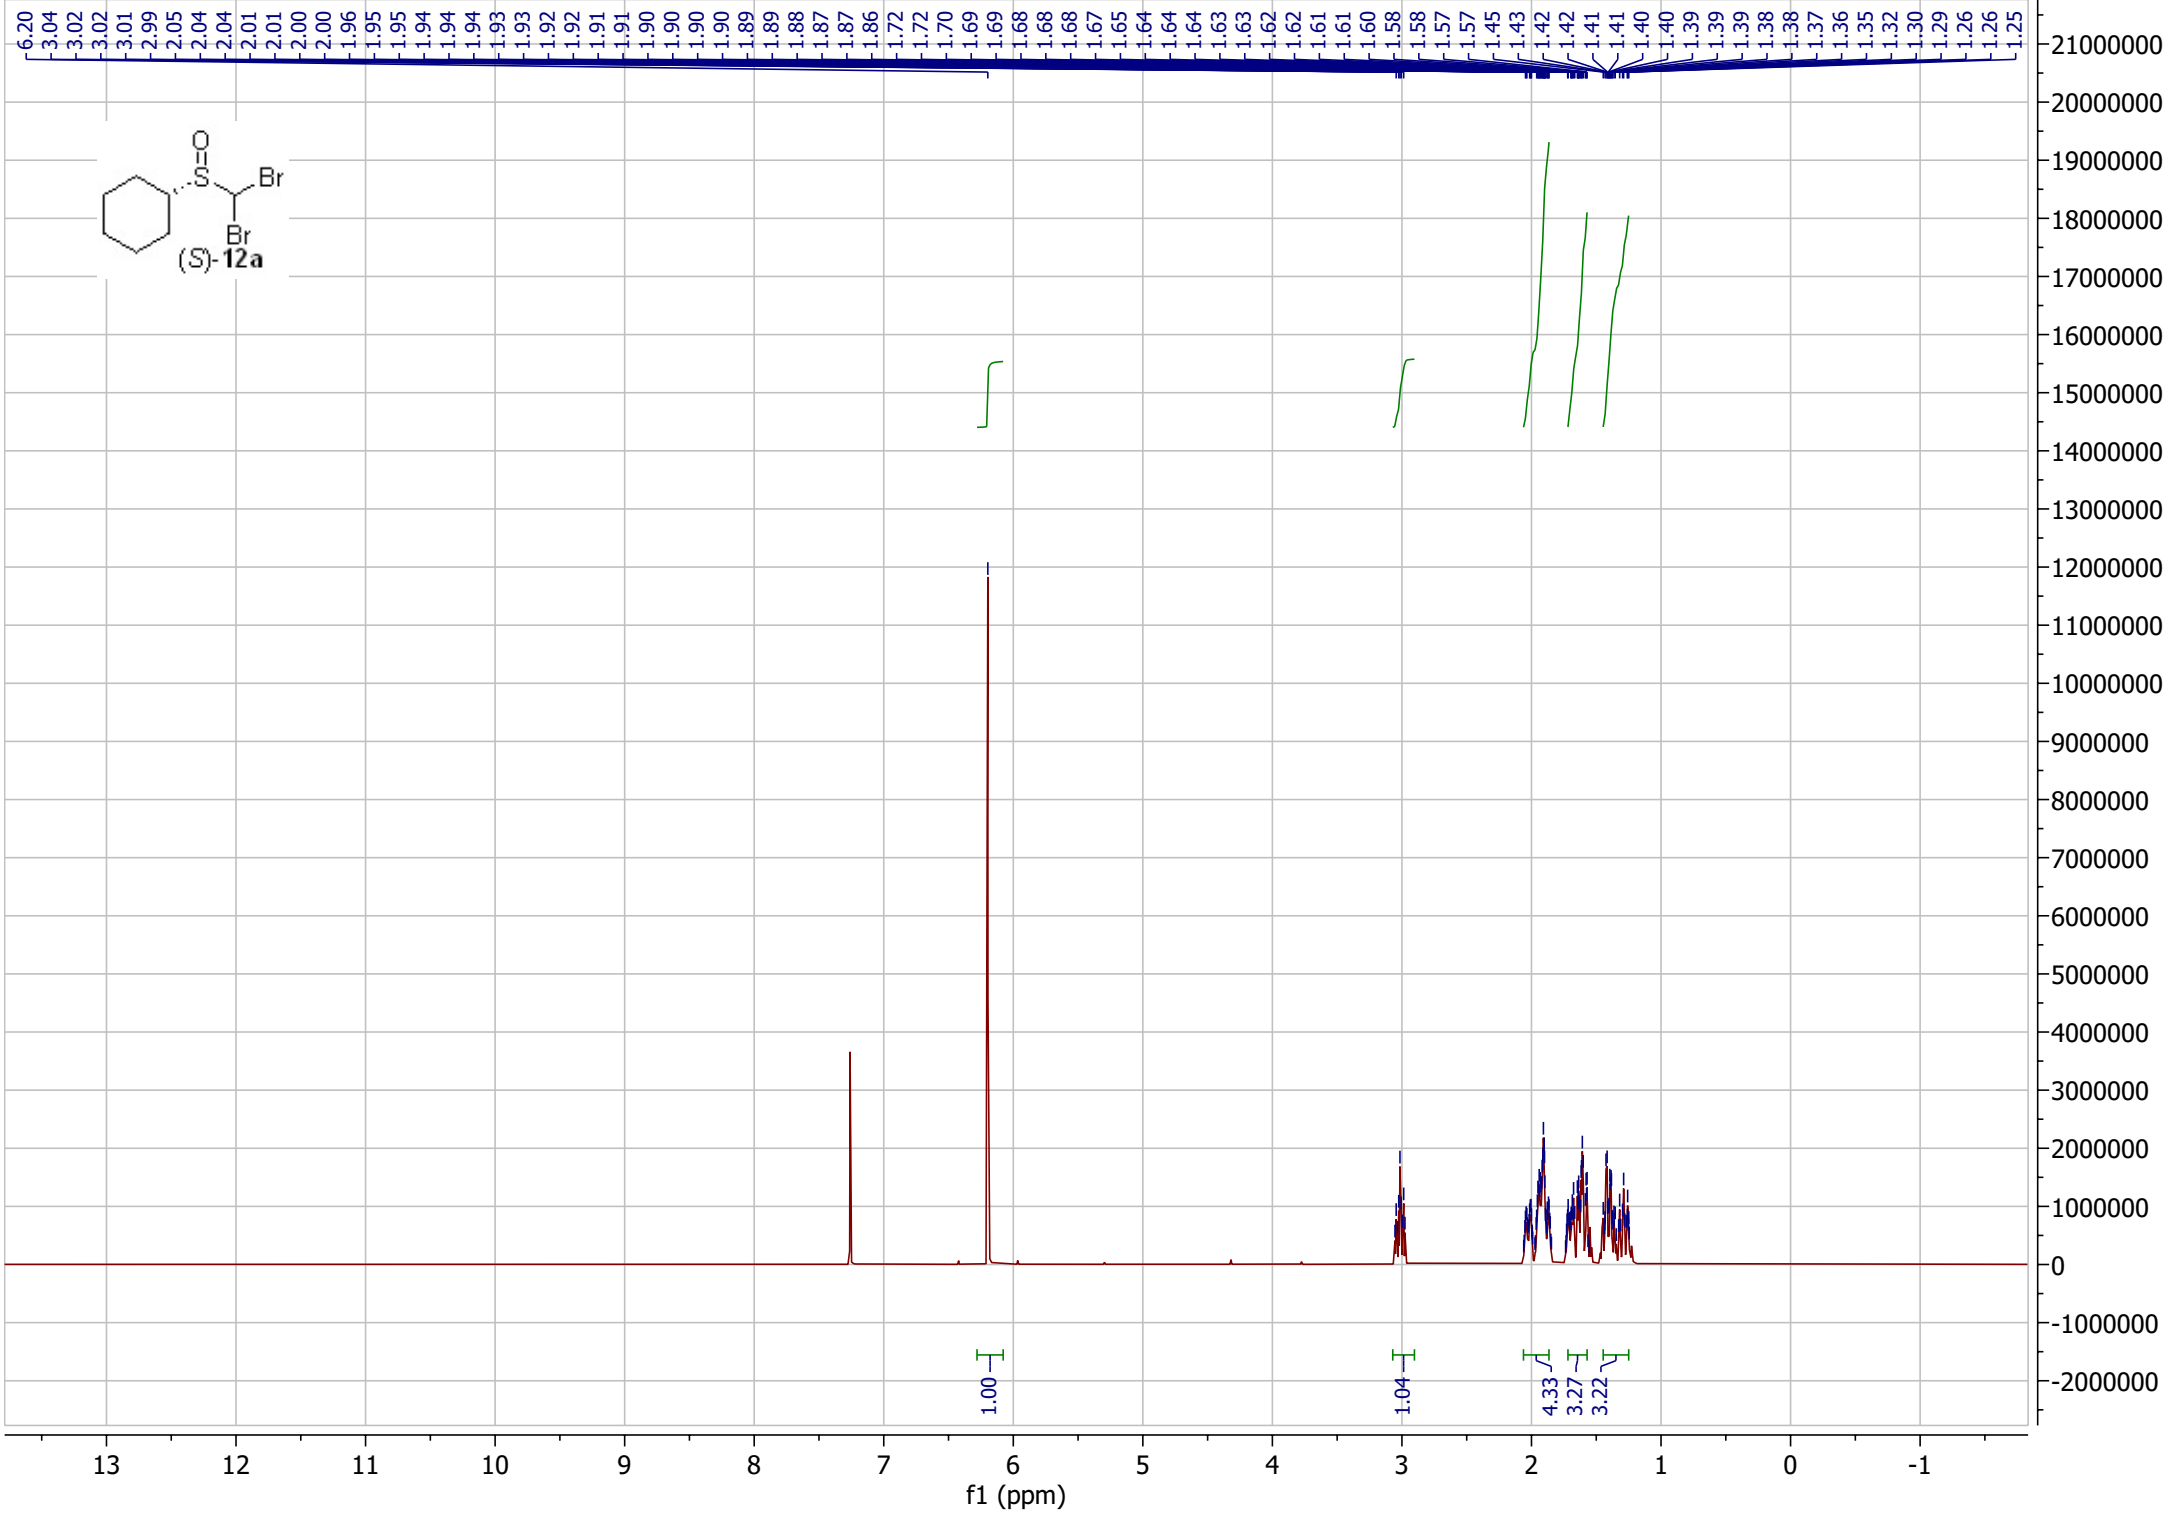

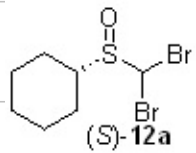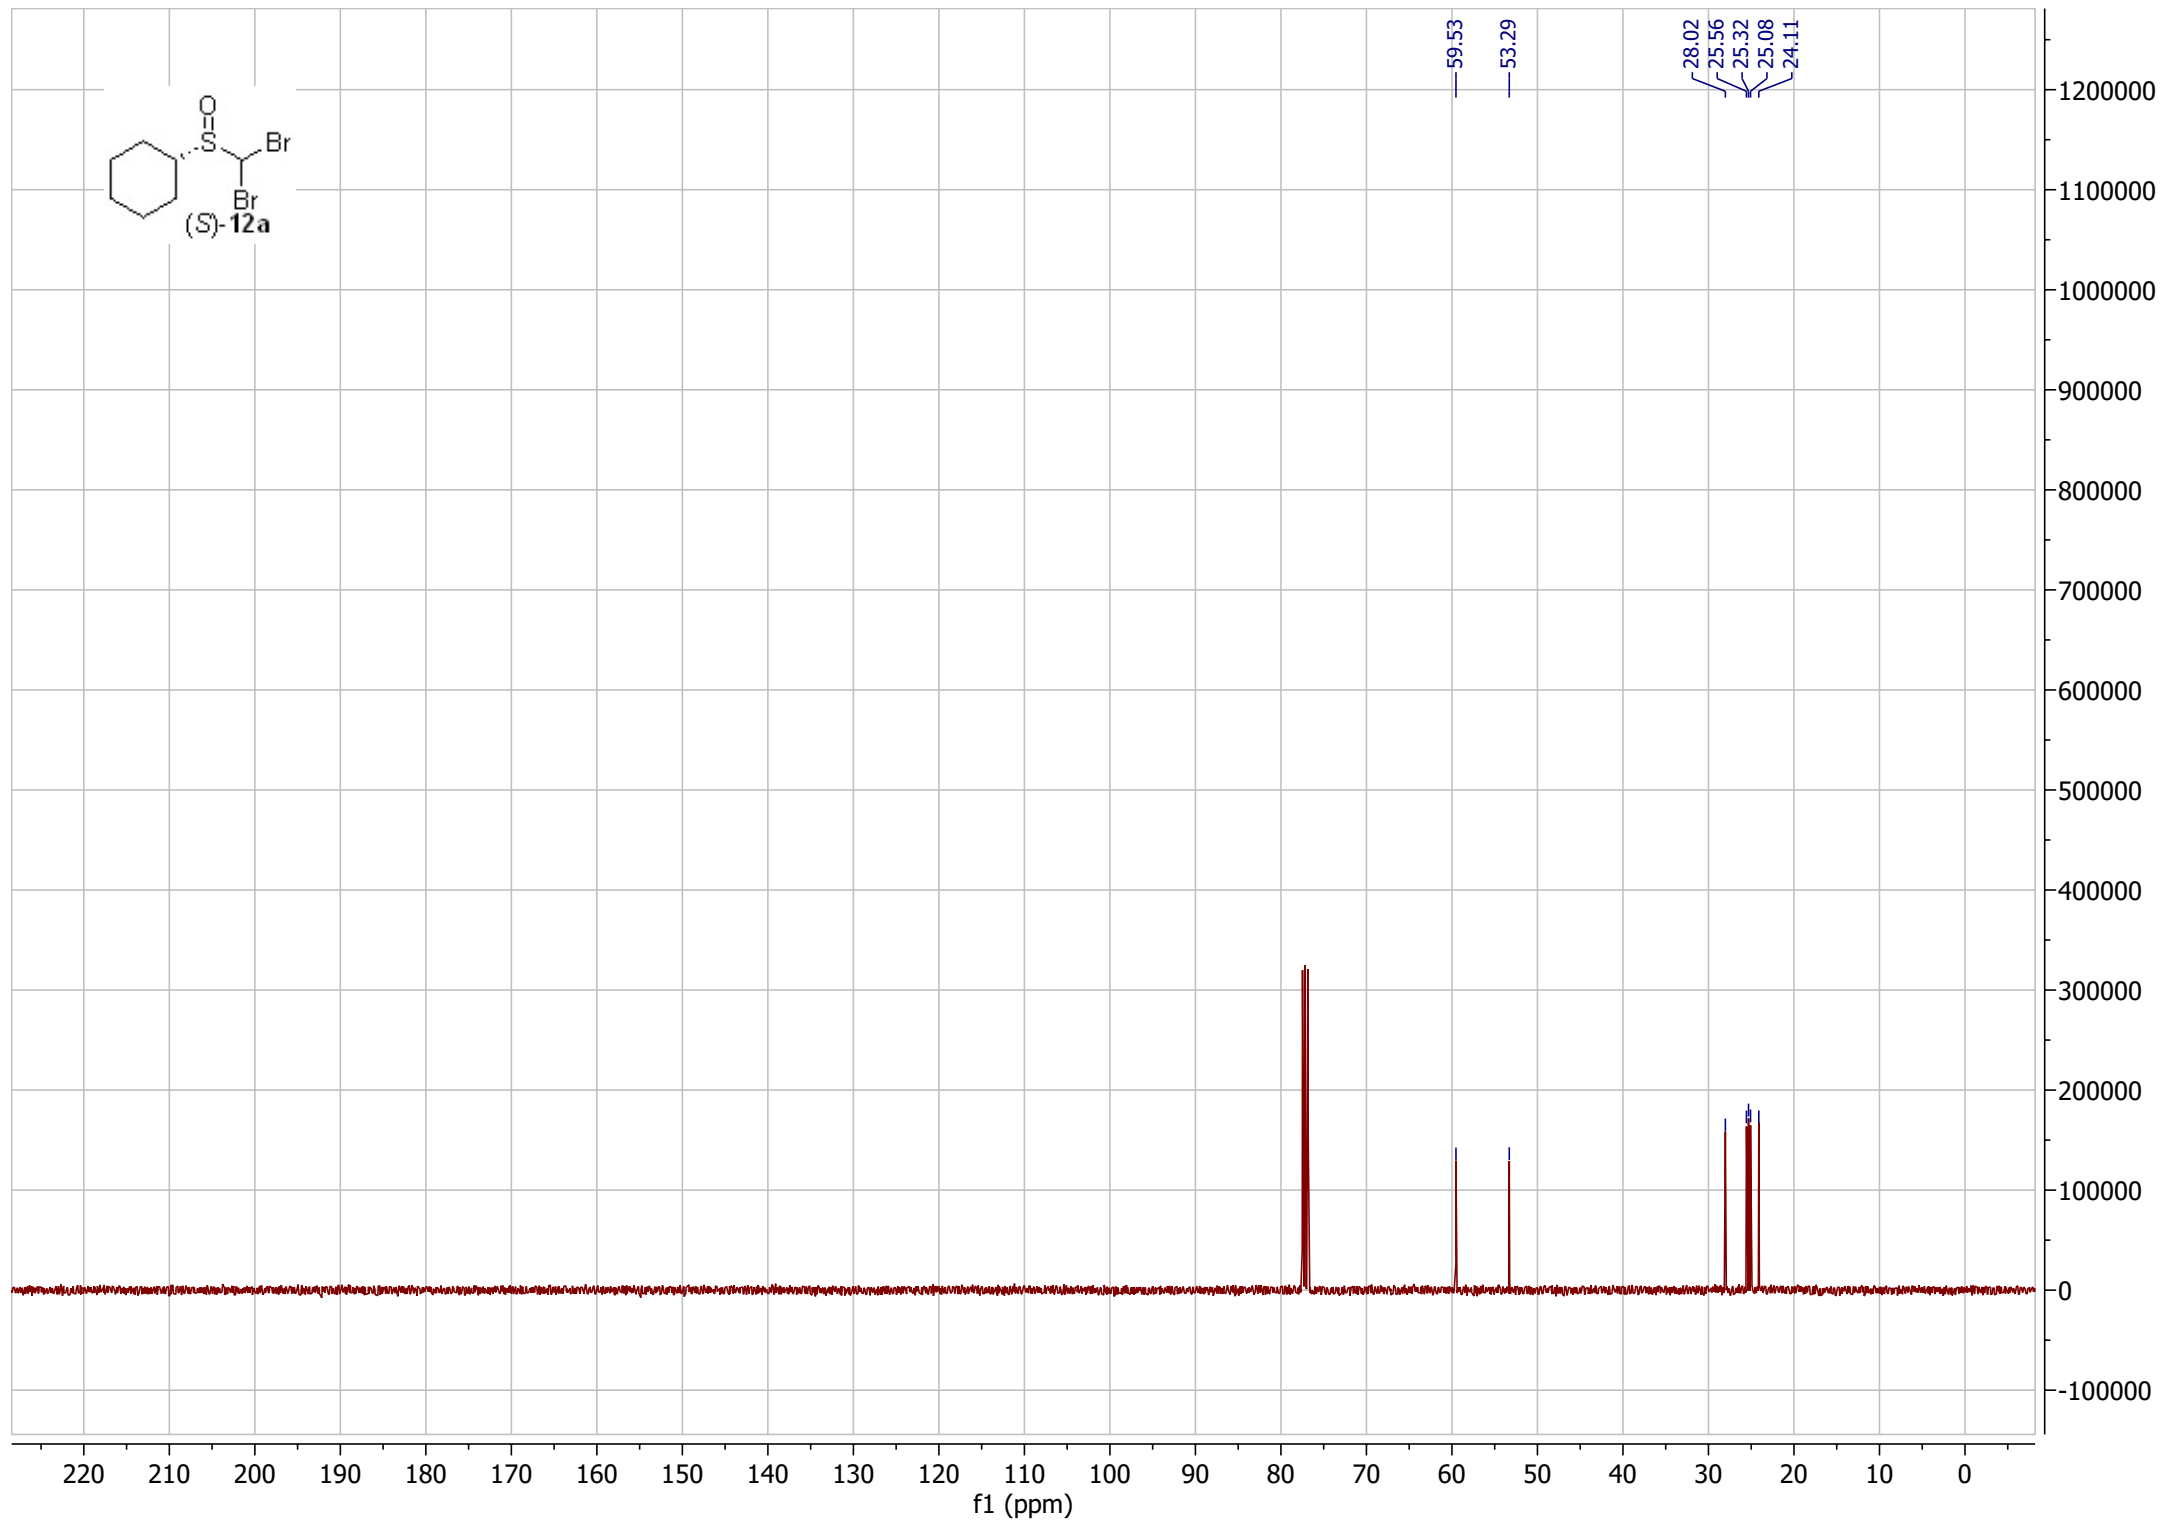

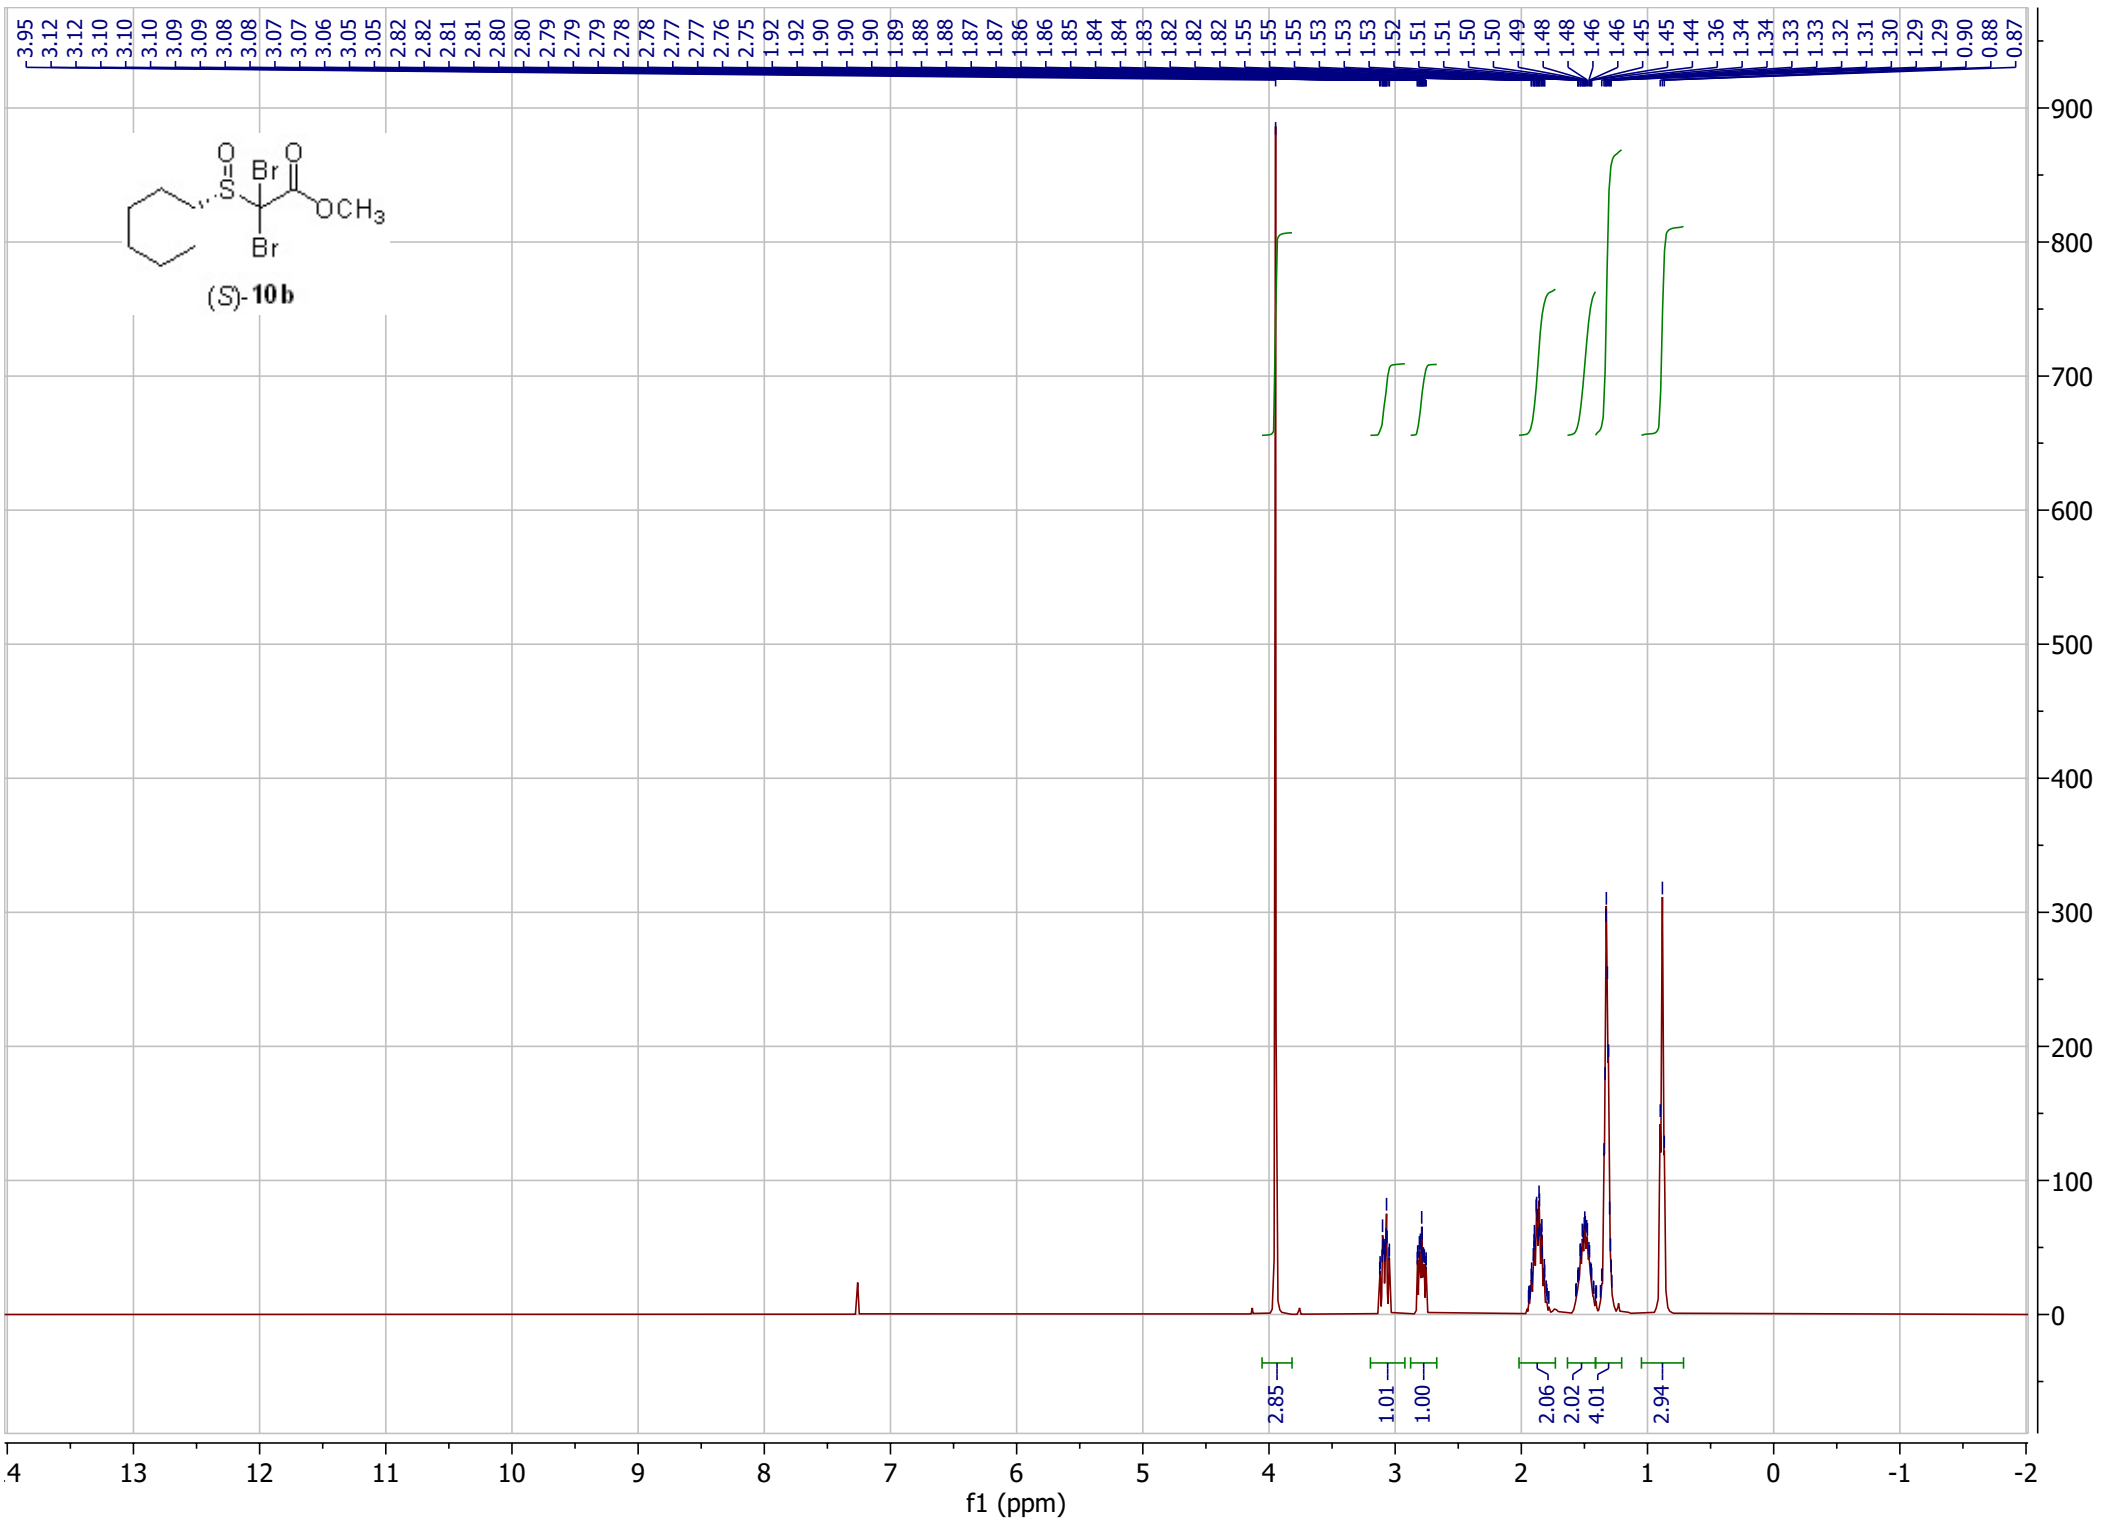

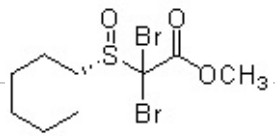

(S)-10b

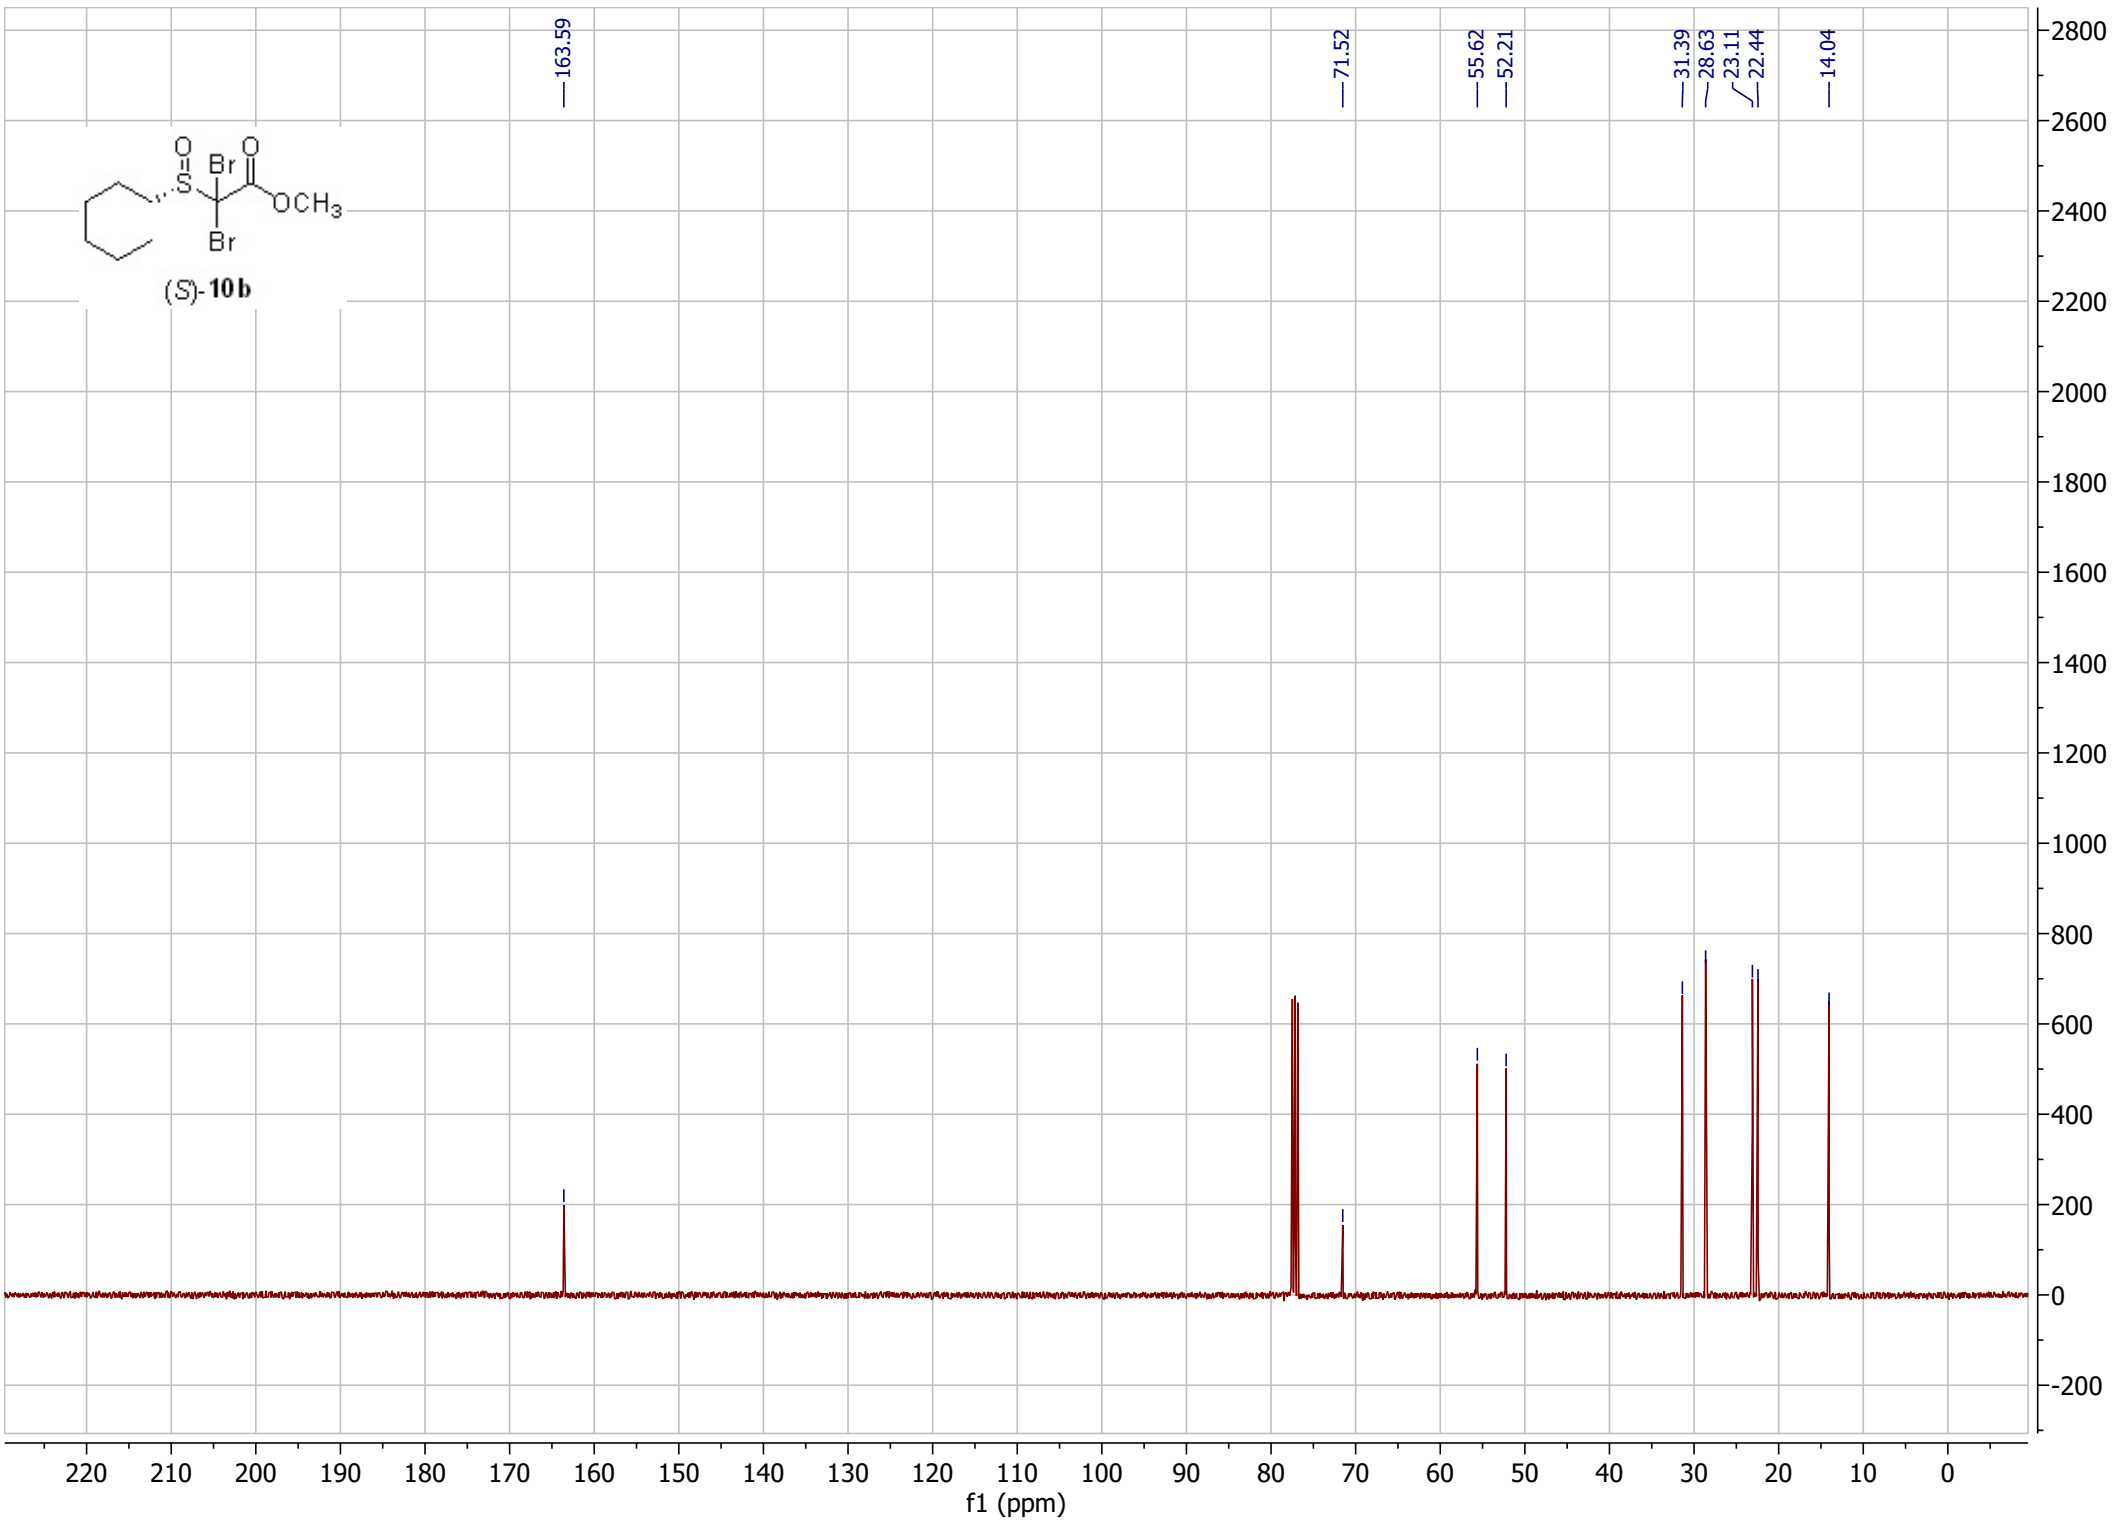

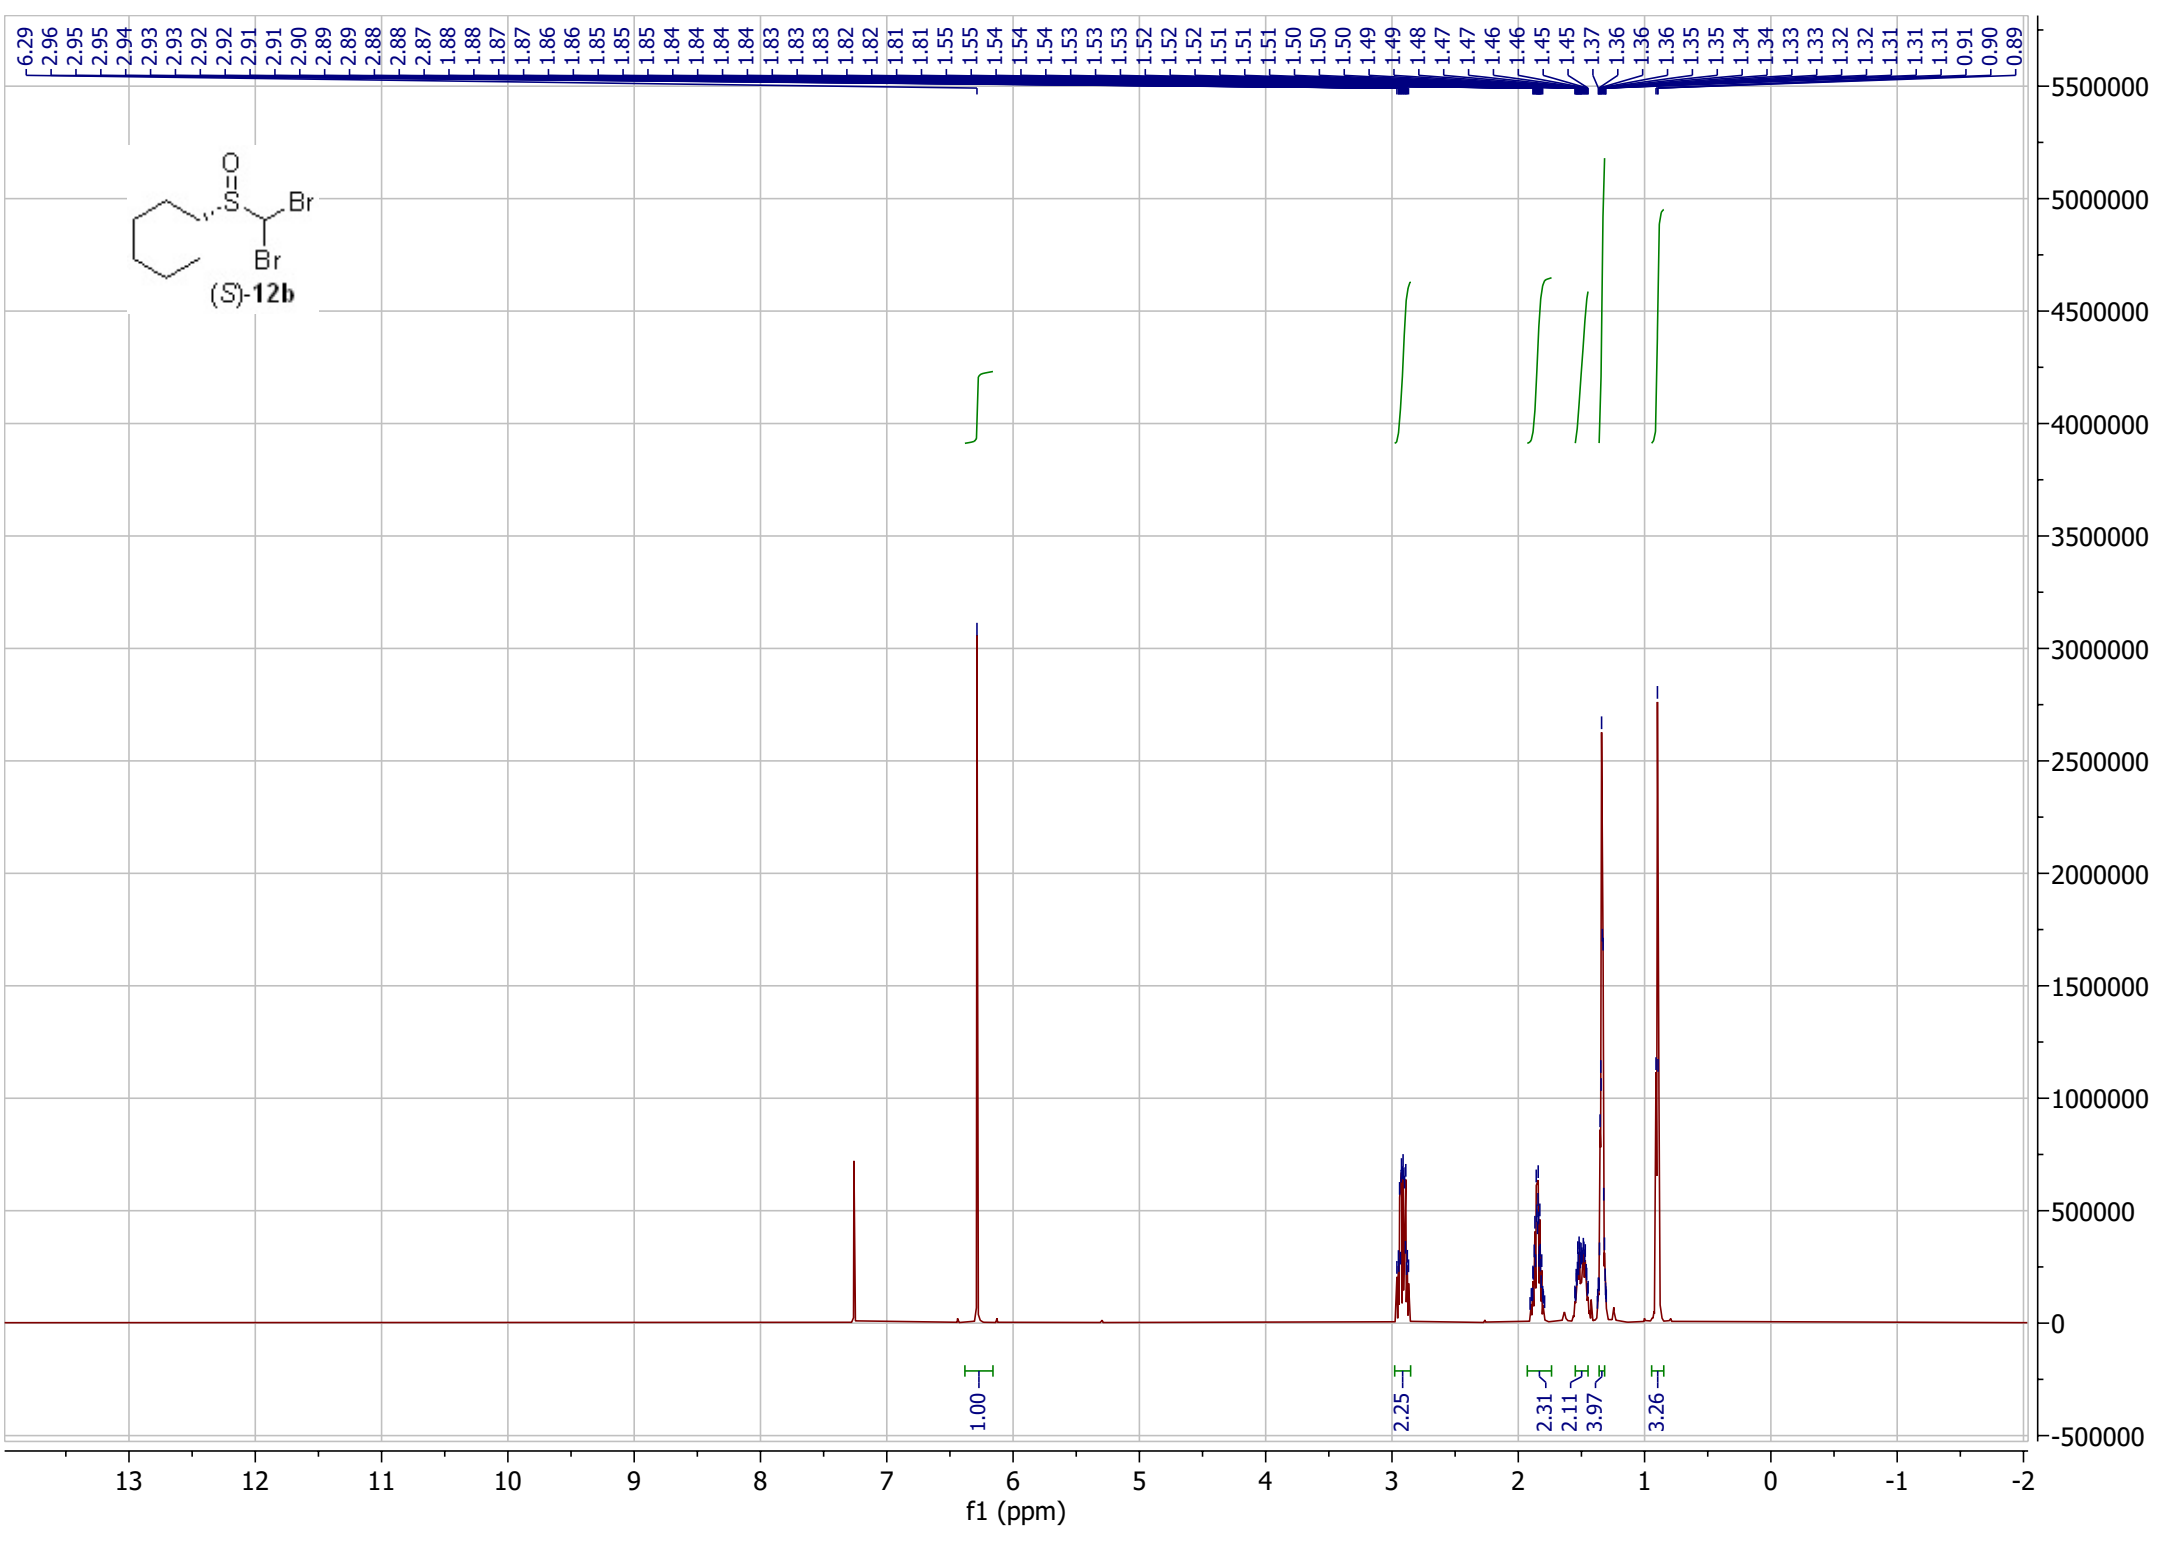

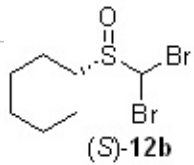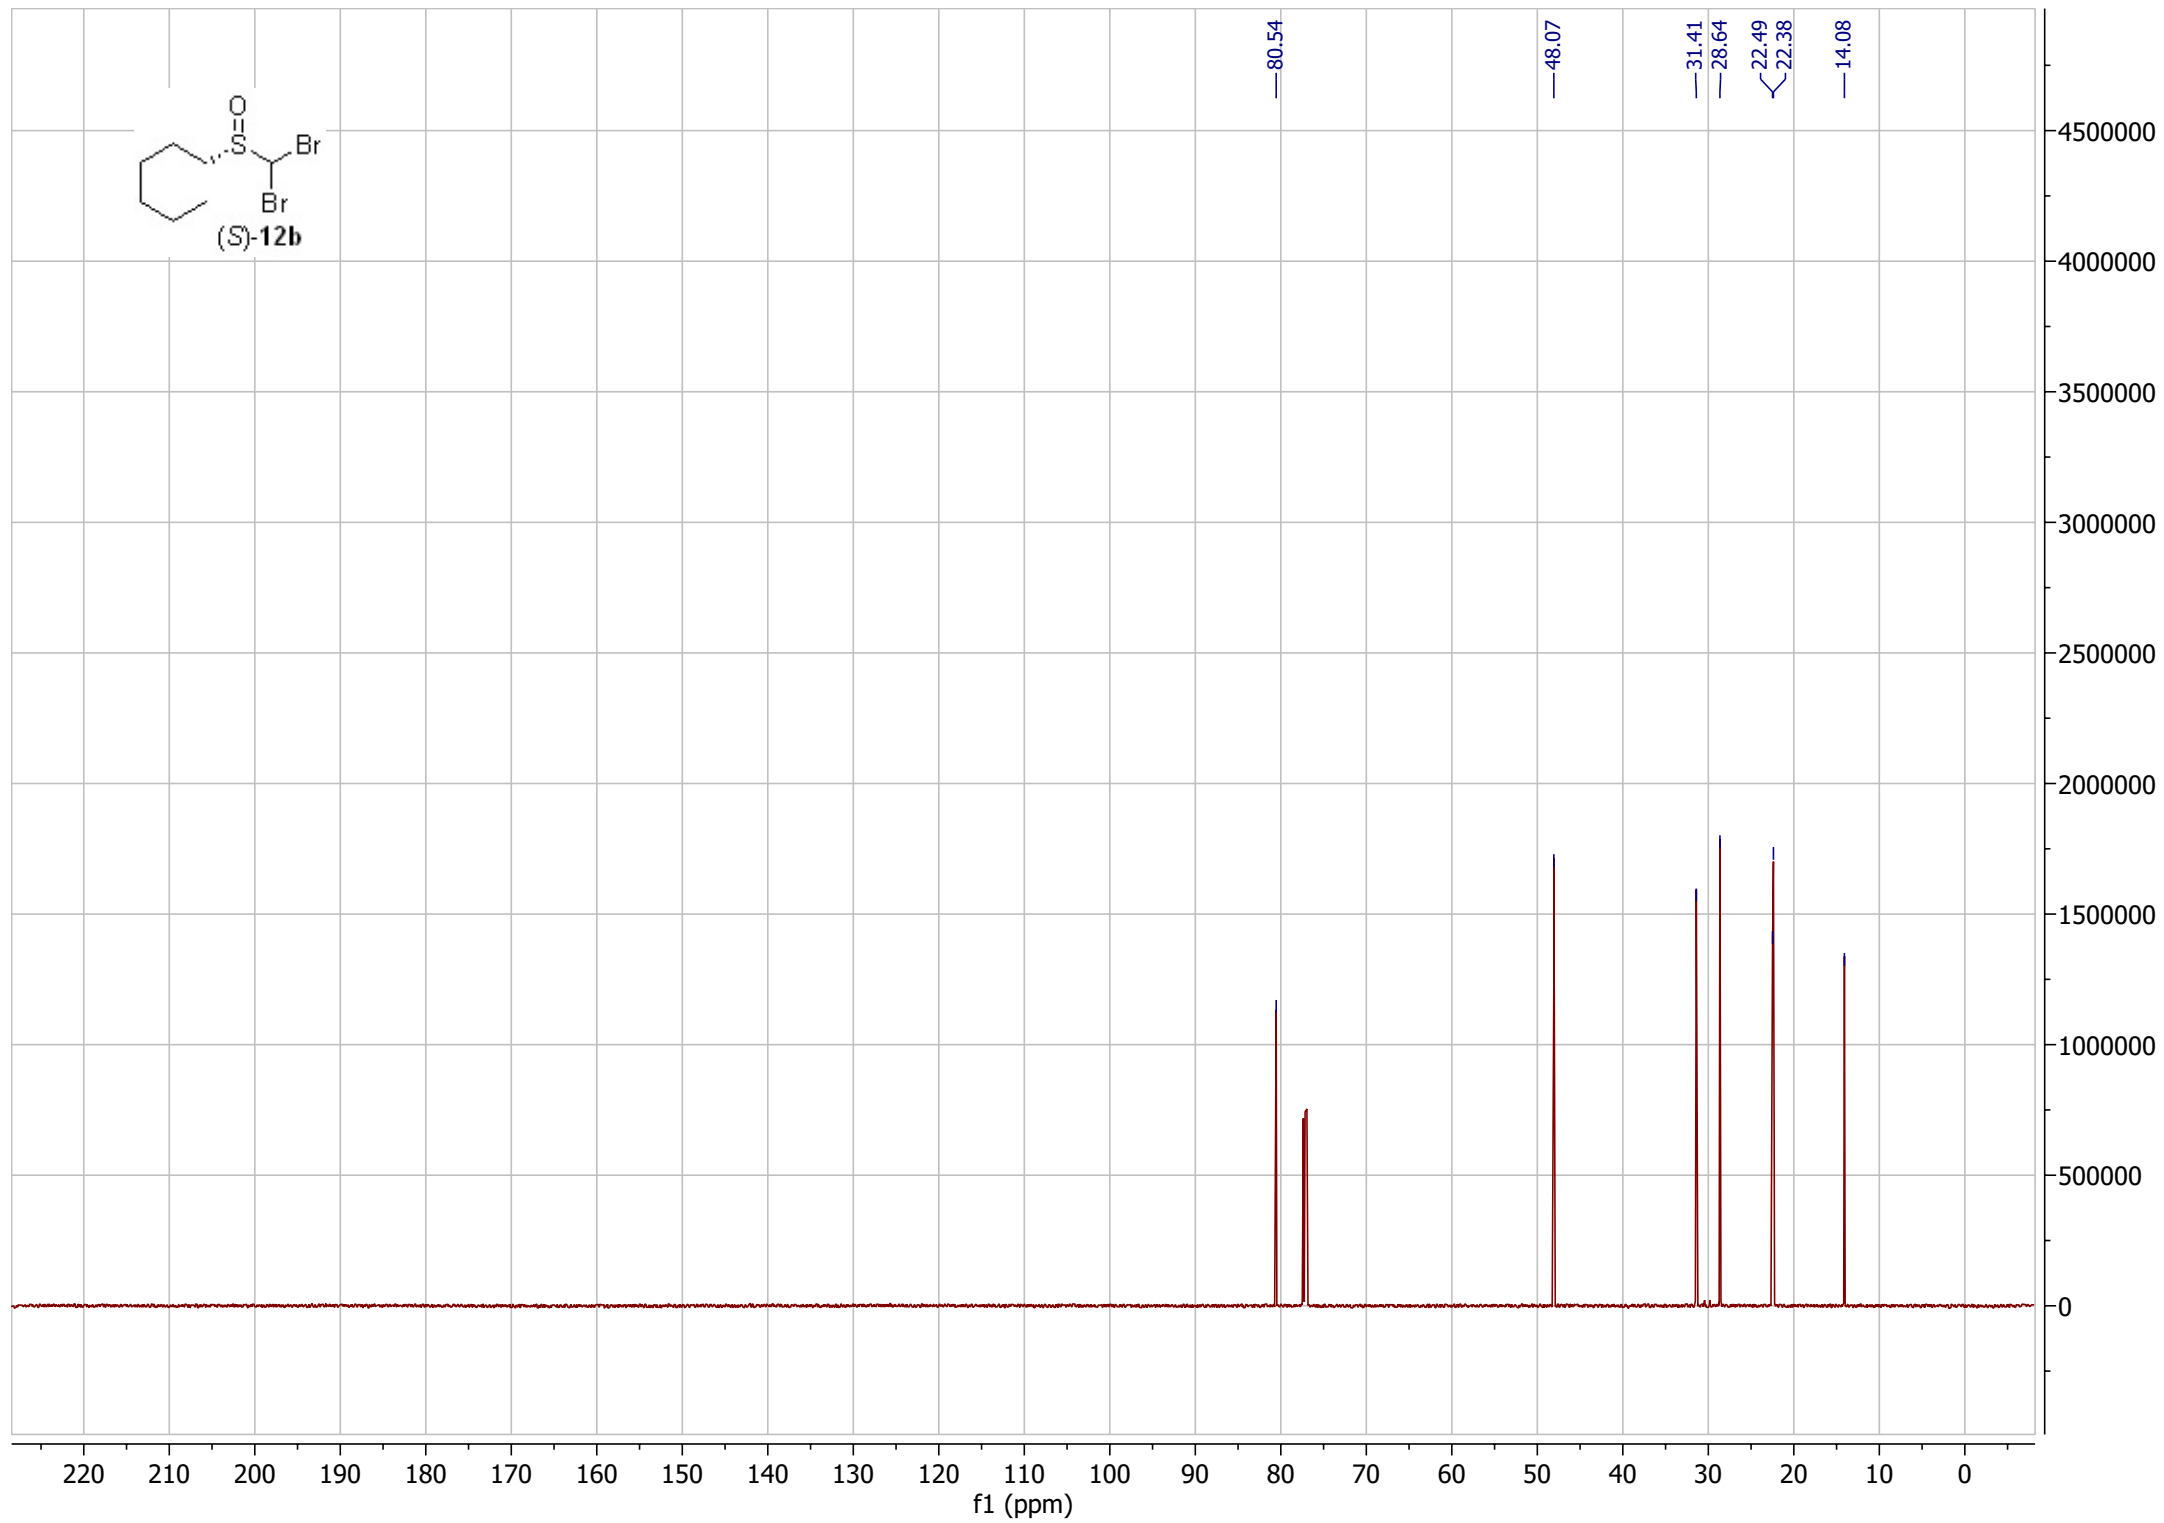

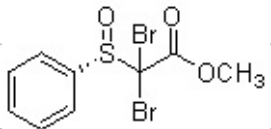

(S)-10c

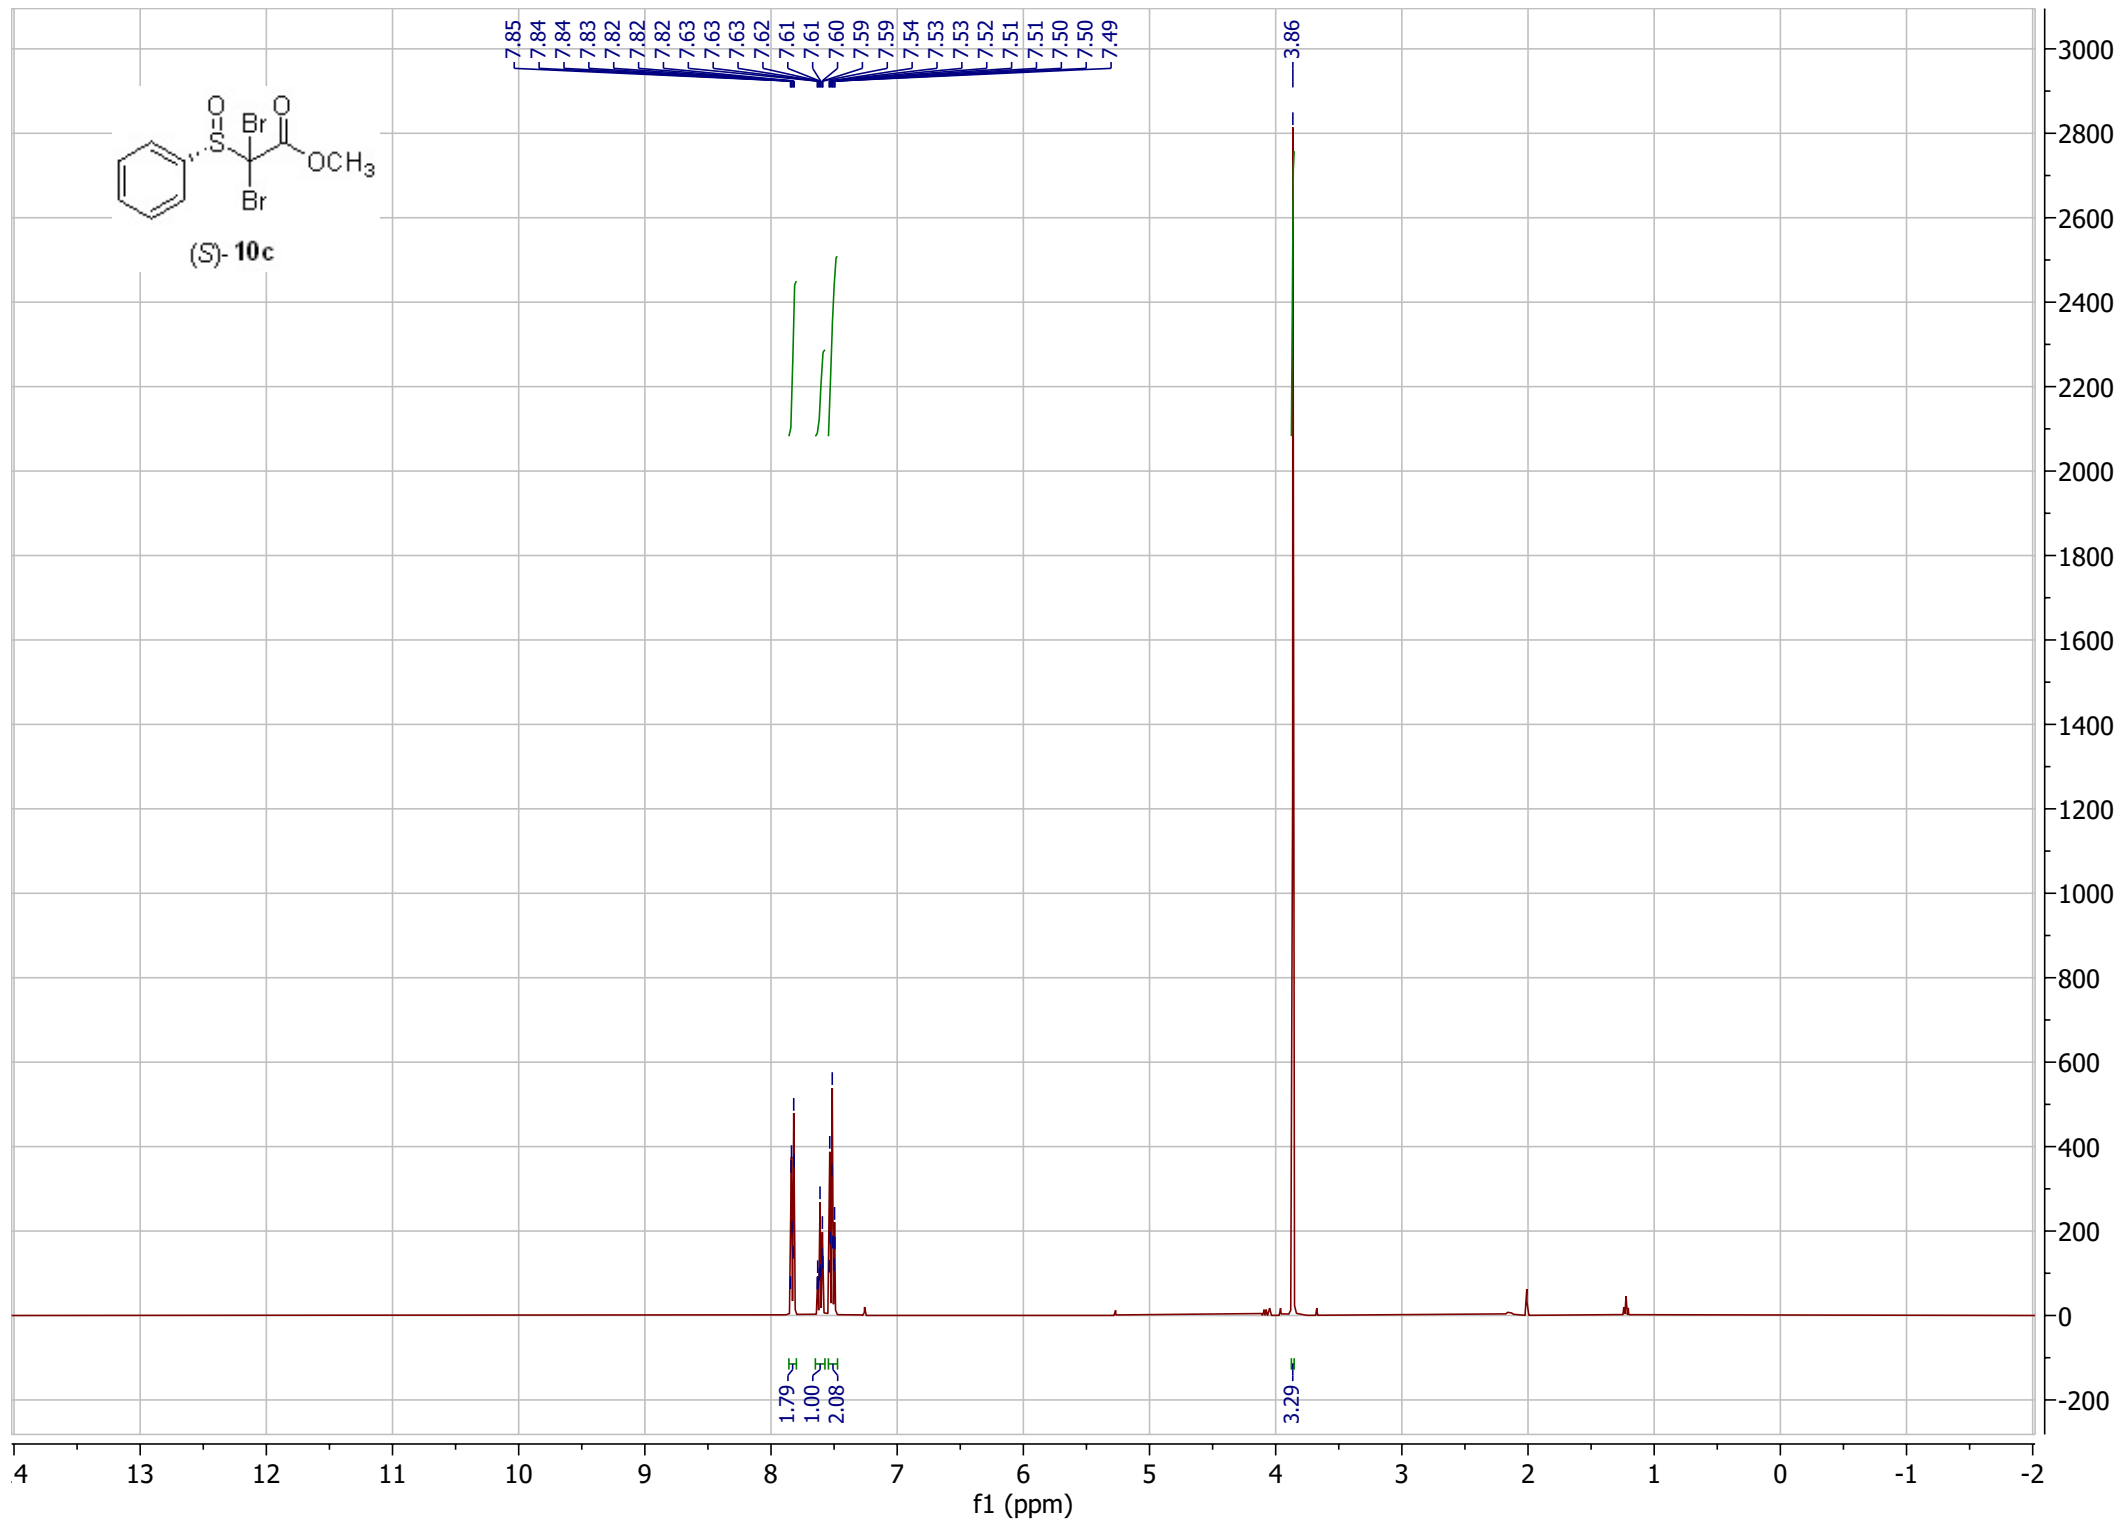

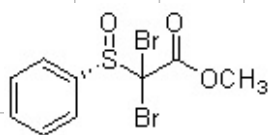

(S)- 10c

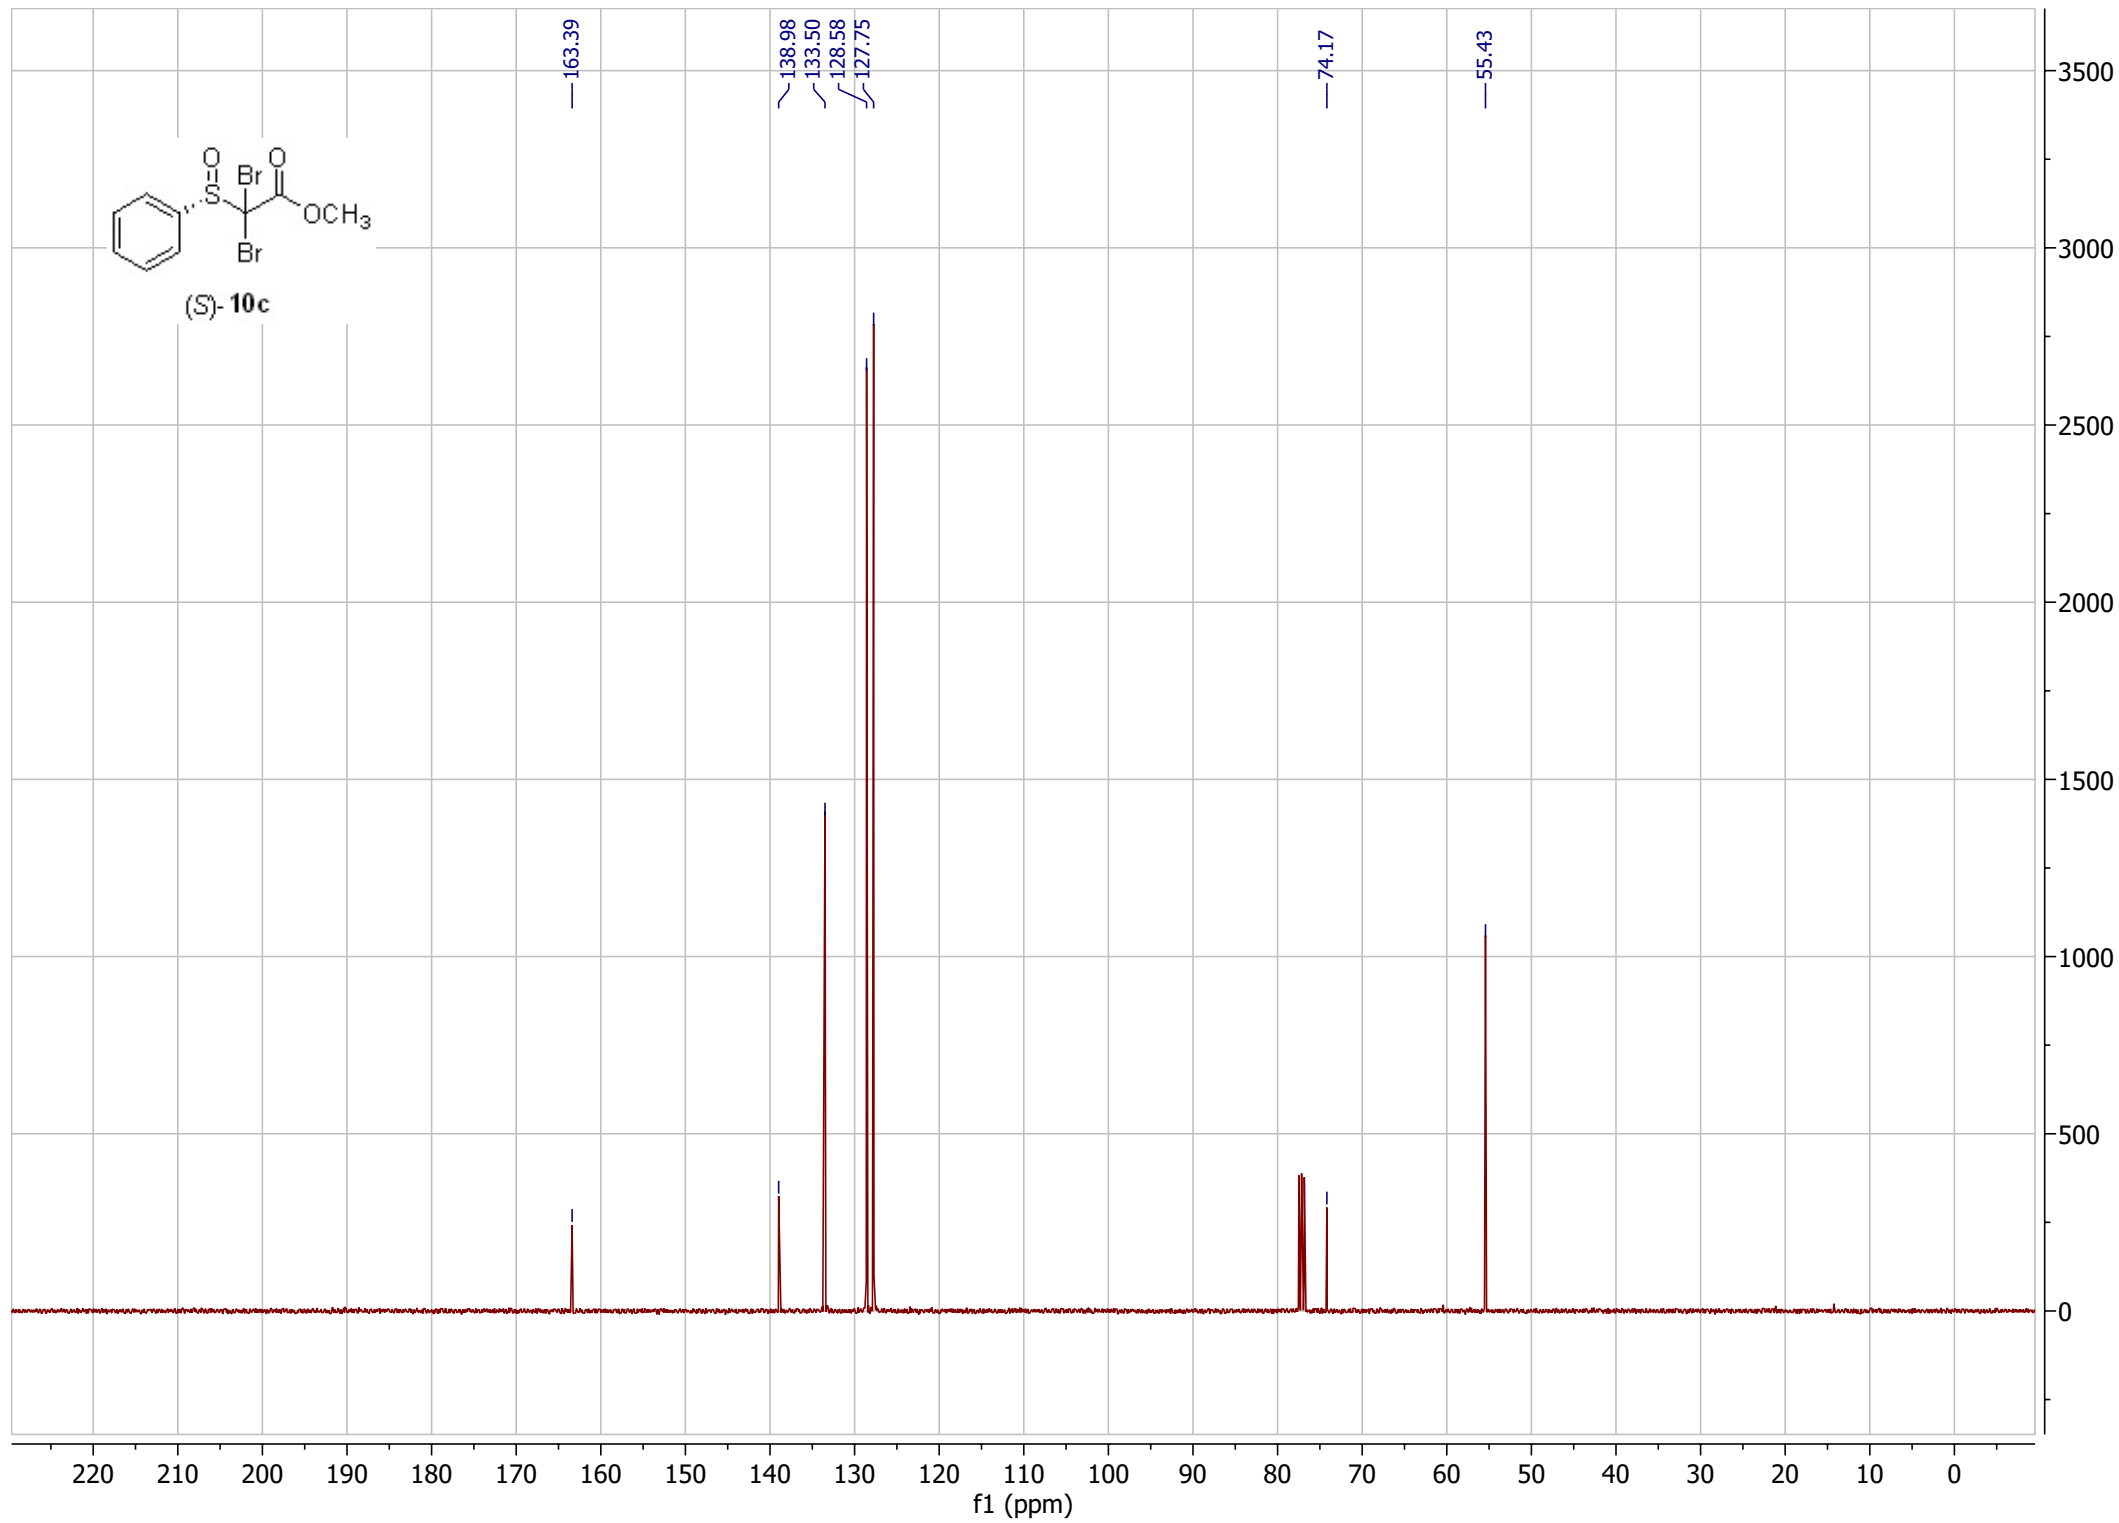



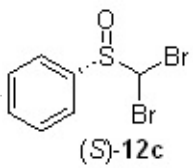

7.83  
7.83  
7.82  
7.82  
7.81  
7.81  
7.80  
7.80  
7.66  
7.66  
7.65  
7.65  
7.64  
7.64  
7.63  
7.62  
7.62  
7.59  
7.59  
7.58  
7.58  
7.57  
7.57  
7.56  
7.56  
7.56  
7.55  
7.55  
7.55  
7.54  
6.15

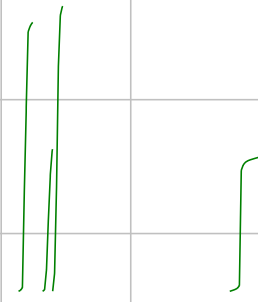

2.01  
1.06  
2.13  
1.00

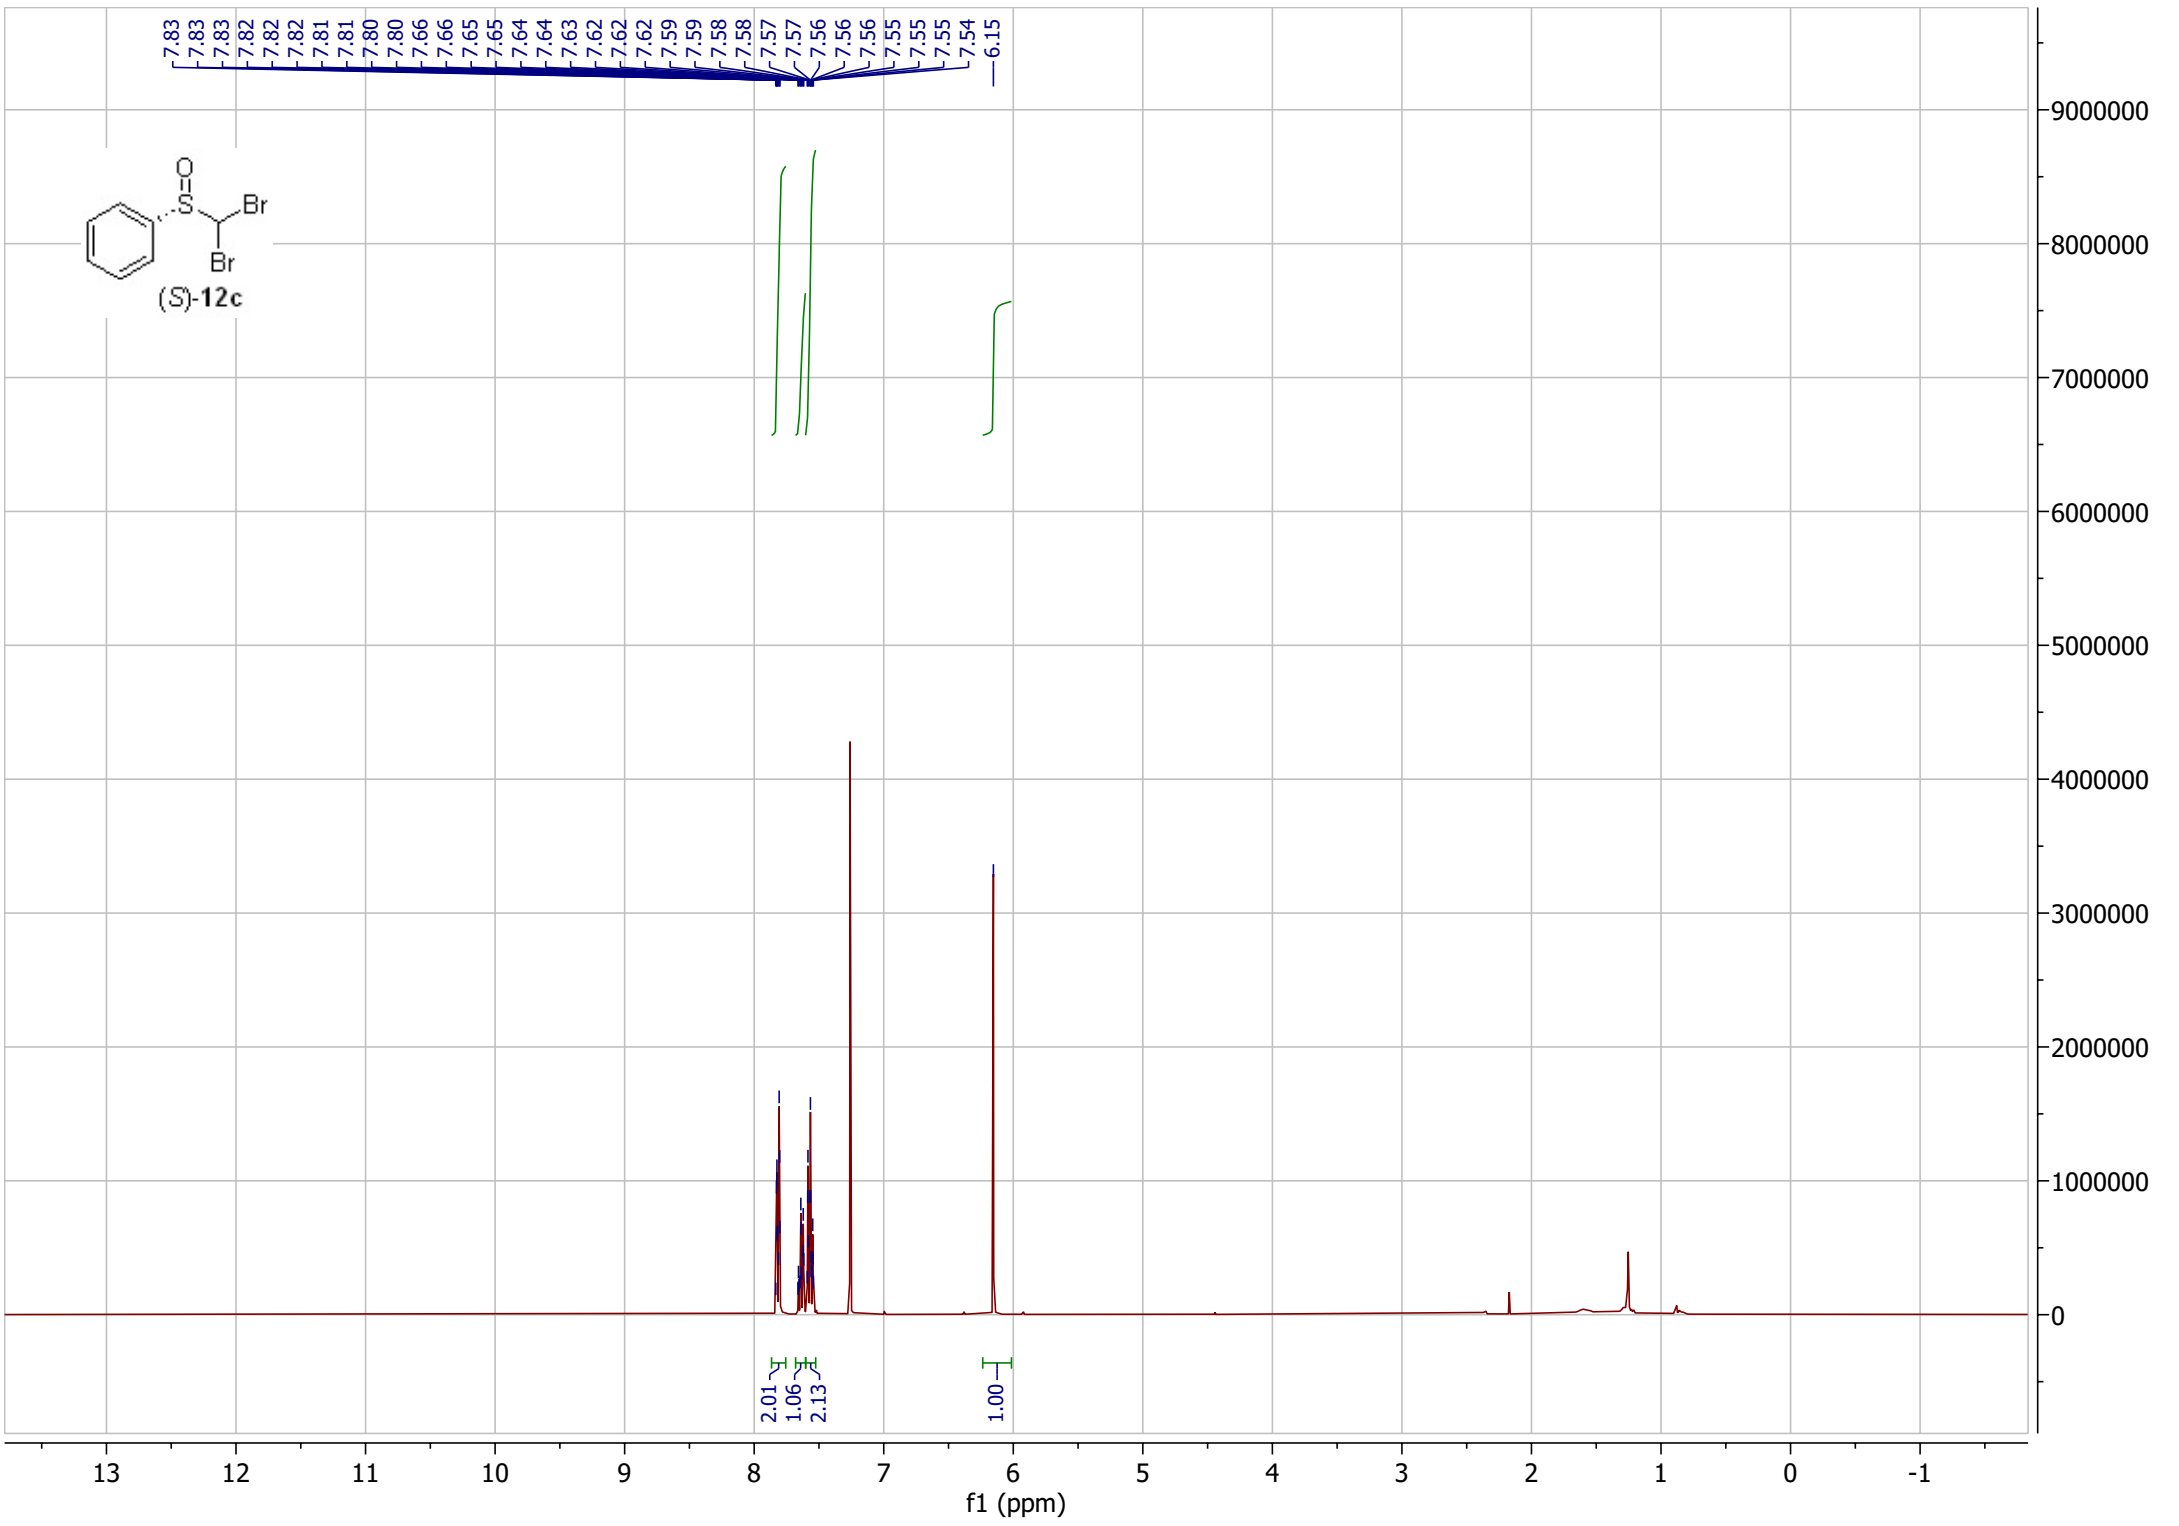

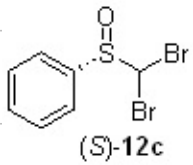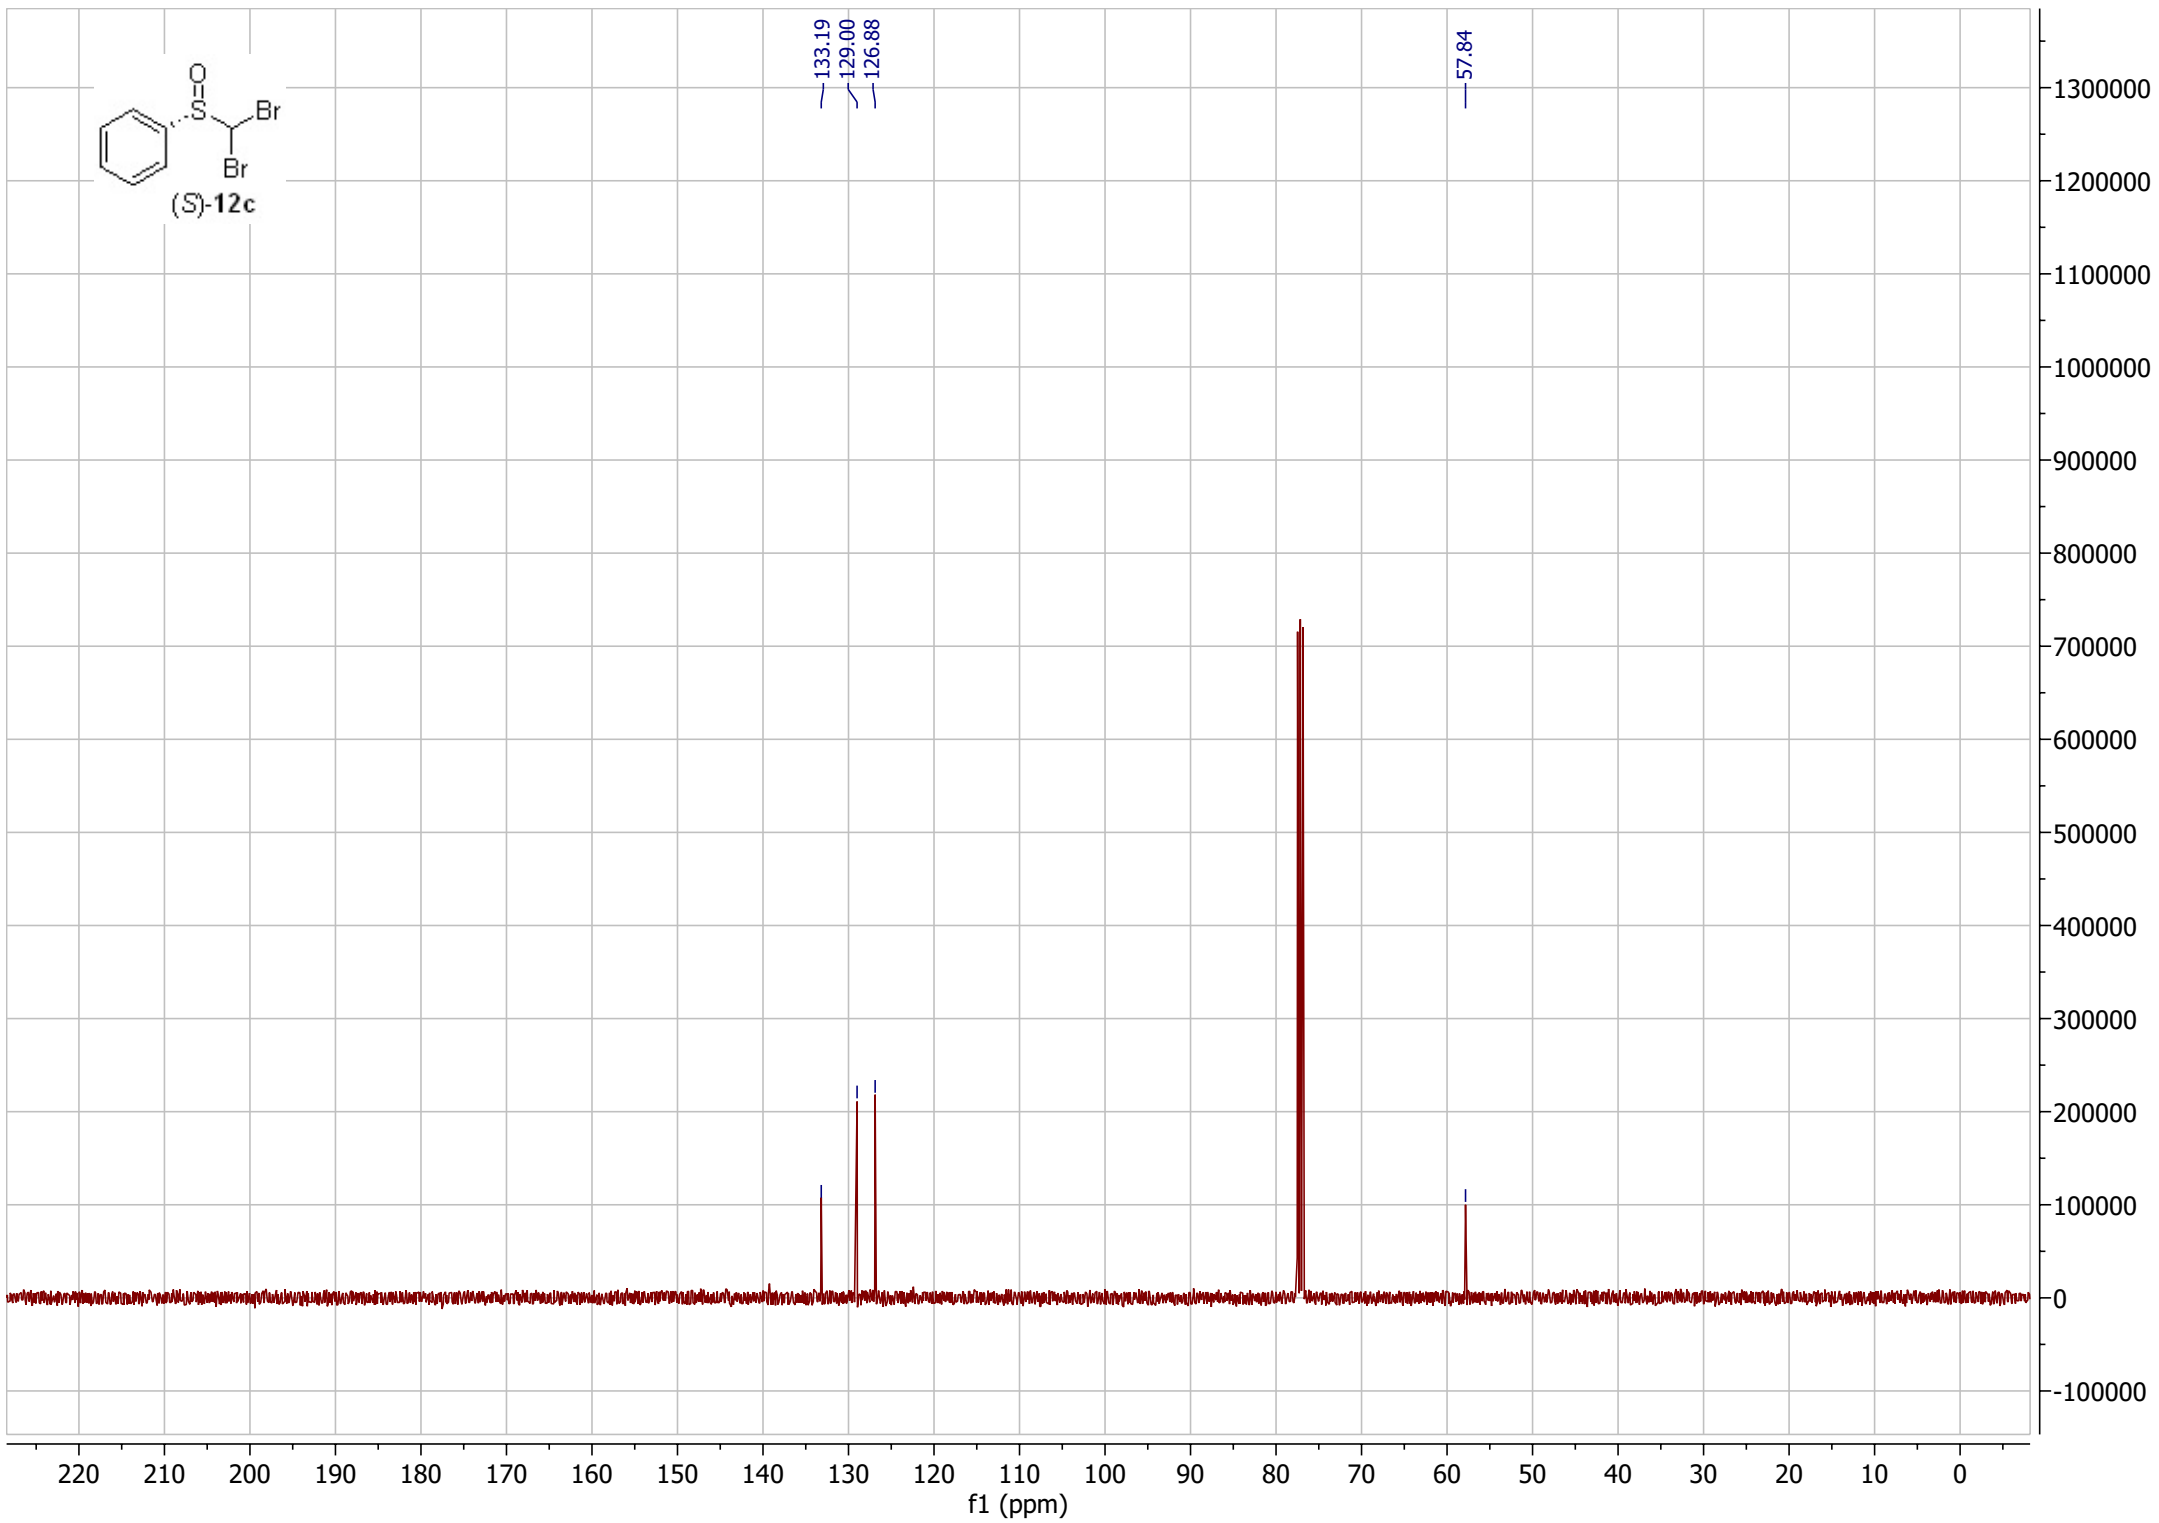

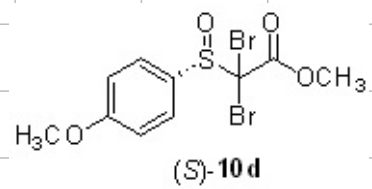

7.79  
7.79  
7.78  
7.78  
7.77  
7.76  
7.76  
7.03  
7.02  
7.02  
7.01  
7.01  
7.00

3.89  
3.87

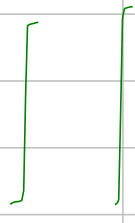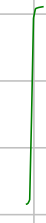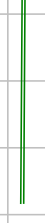

2.00

2.17

3.09  
3.13

13 12 11 10 9 8 7 6 5 4 3 2 1 0 -1 -2

f1 (ppm)

$-2.0 \times 10^6$

$0.0$

$2.0 \times 10^6$

$4.0 \times 10^6$

$6.0 \times 10^6$

$8.0 \times 10^6$

$1.0 \times 10^7$

$1.2 \times 10^7$

$1.4 \times 10^7$

$1.6 \times 10^7$

$1.8 \times 10^7$

$2.0 \times 10^7$

$2.2 \times 10^7$

$2.4 \times 10^7$

$2.6 \times 10^7$

$2.8 \times 10^7$

$3.0 \times 10^7$

$3.2 \times 10^7$

$3.4 \times 10^7$

$3.6 \times 10^7$

$3.8 \times 10^7$

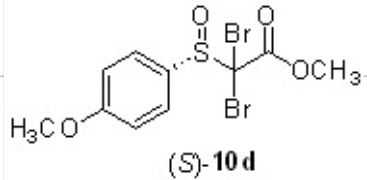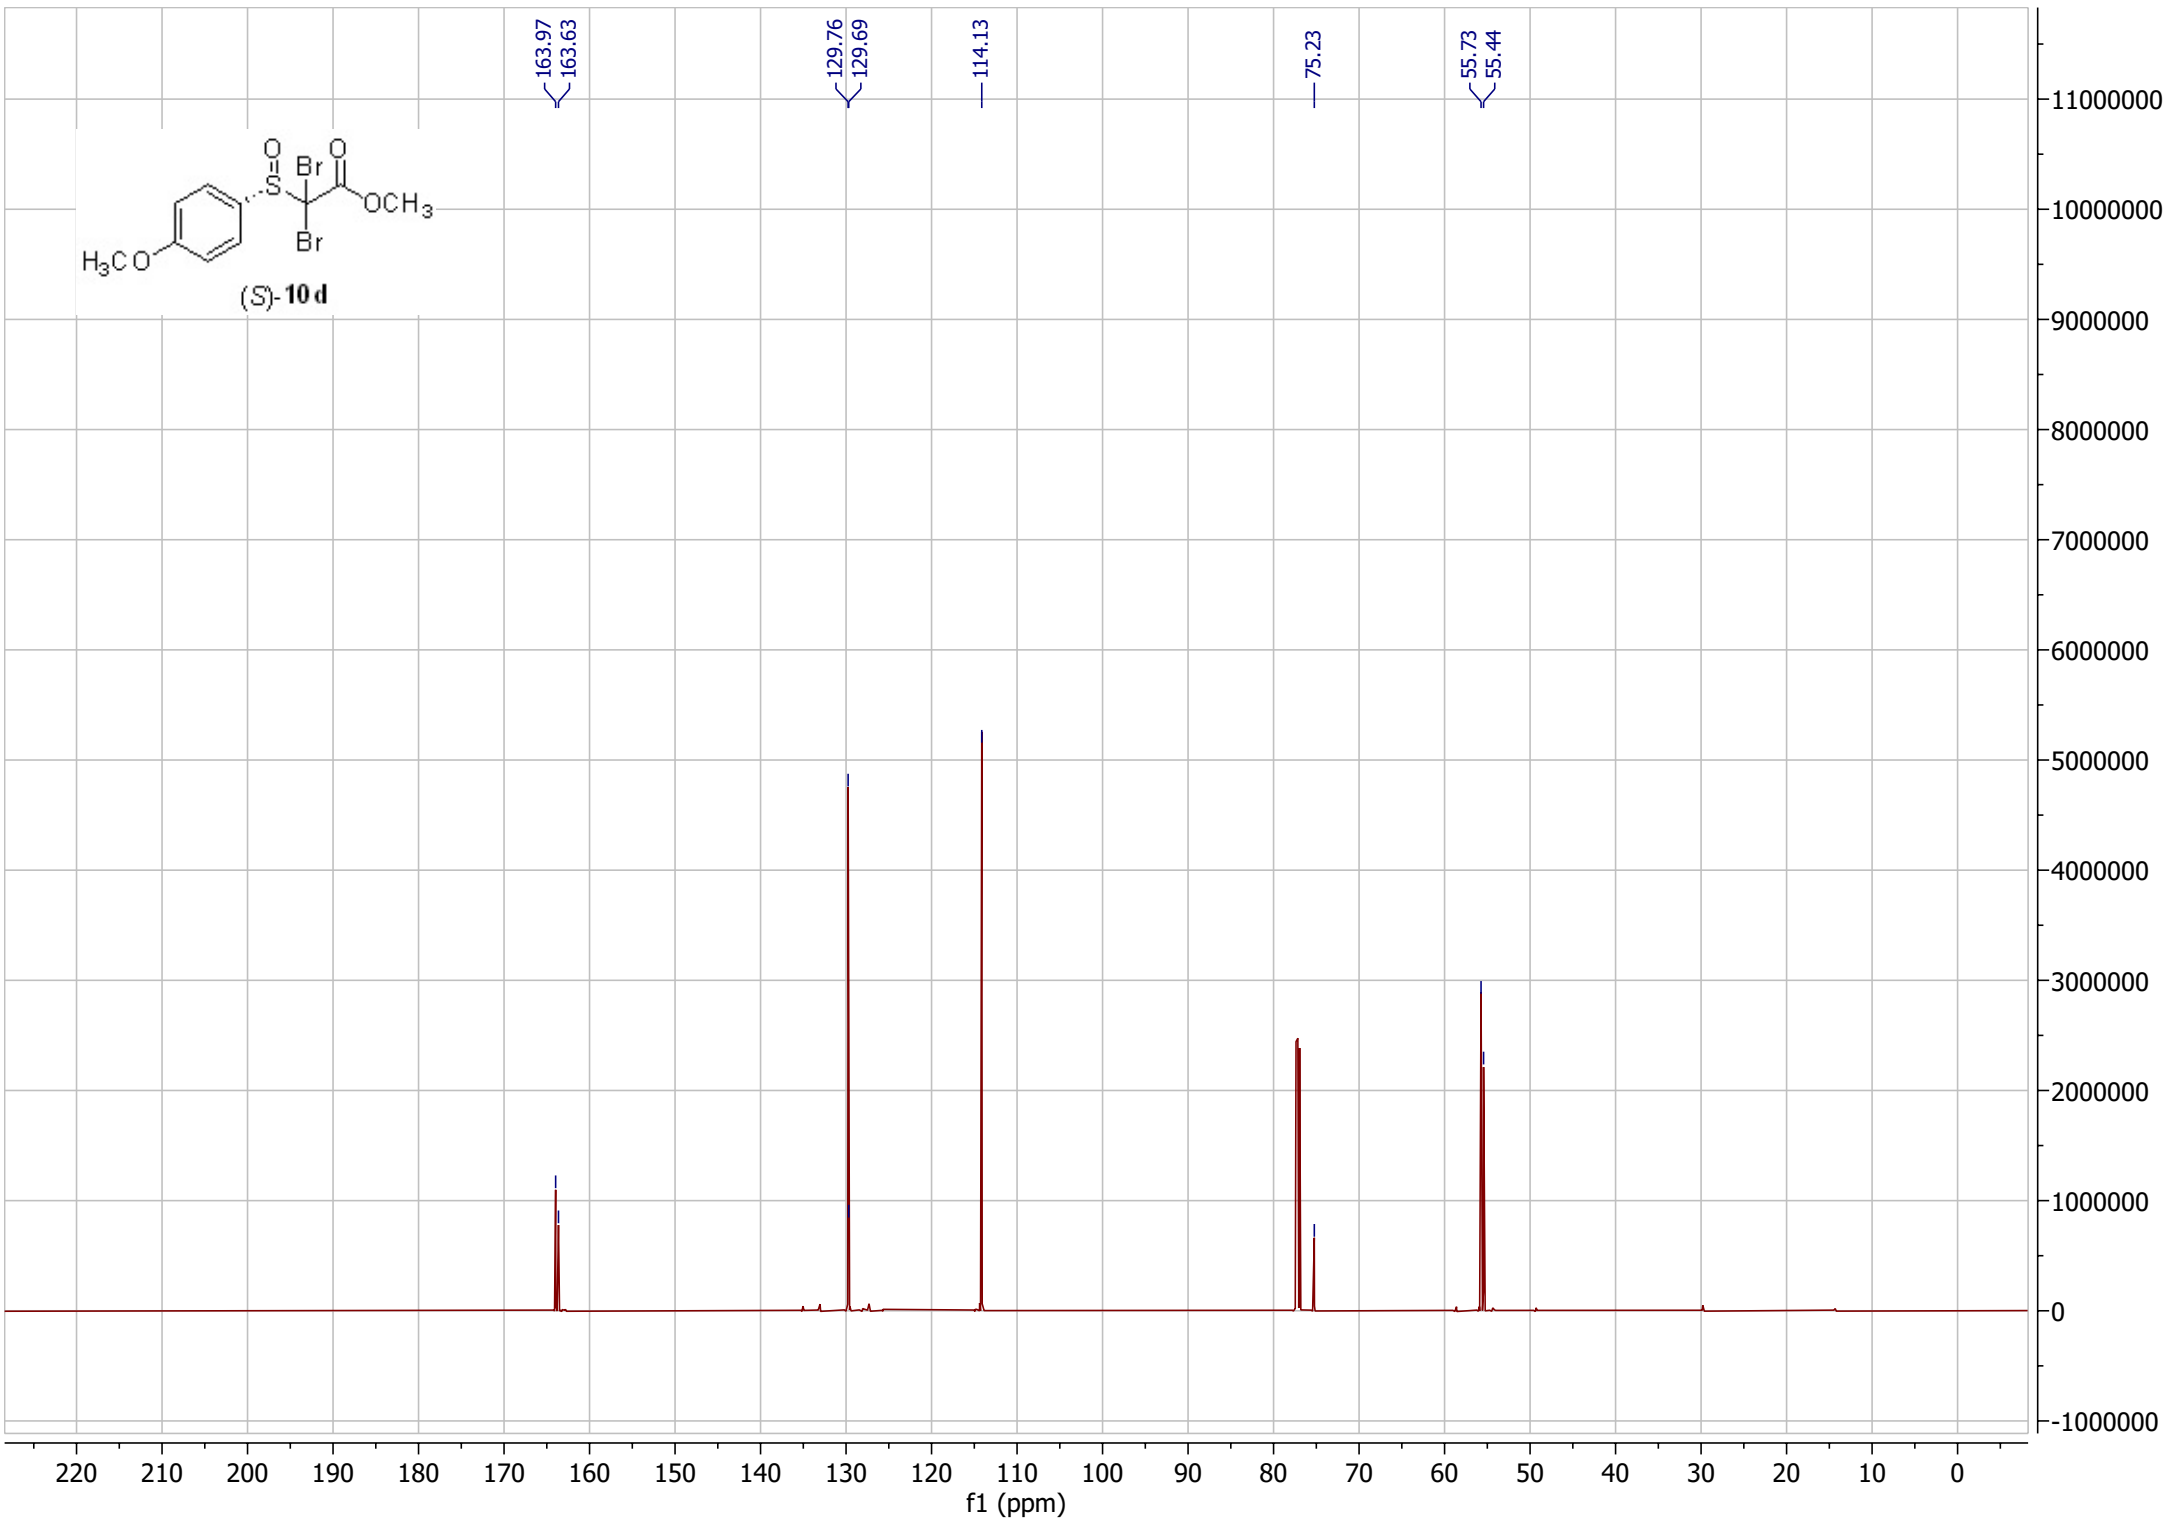

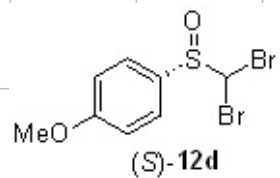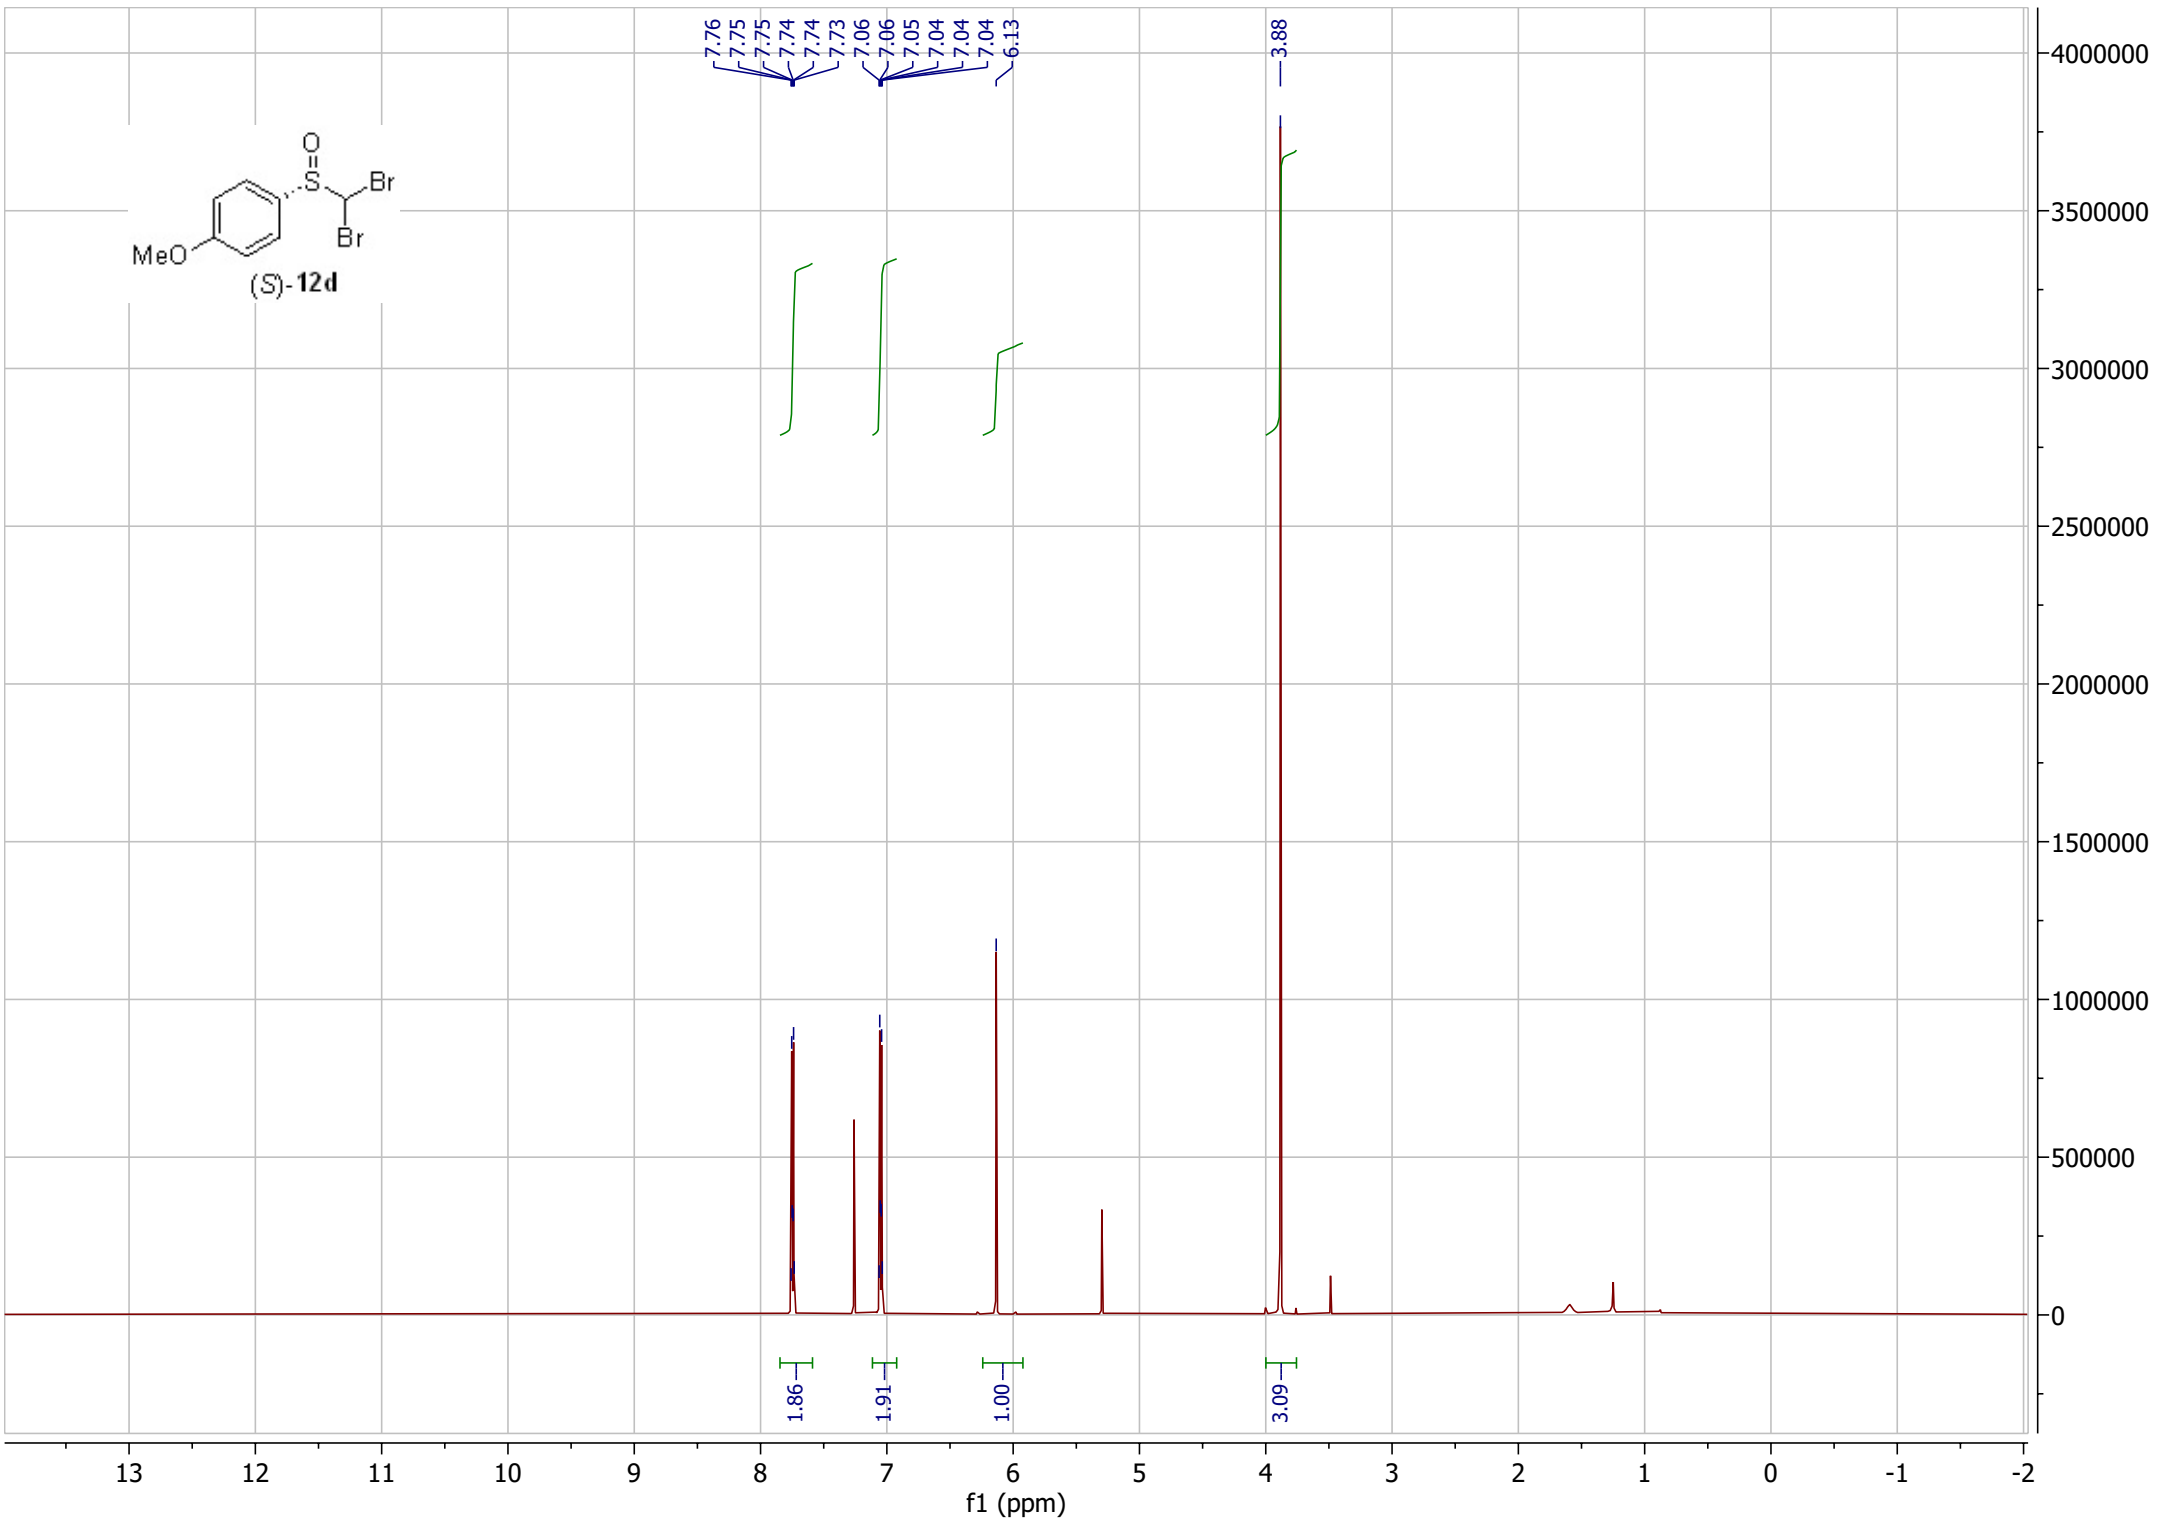

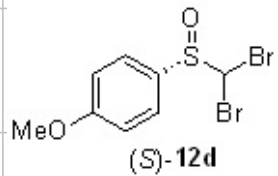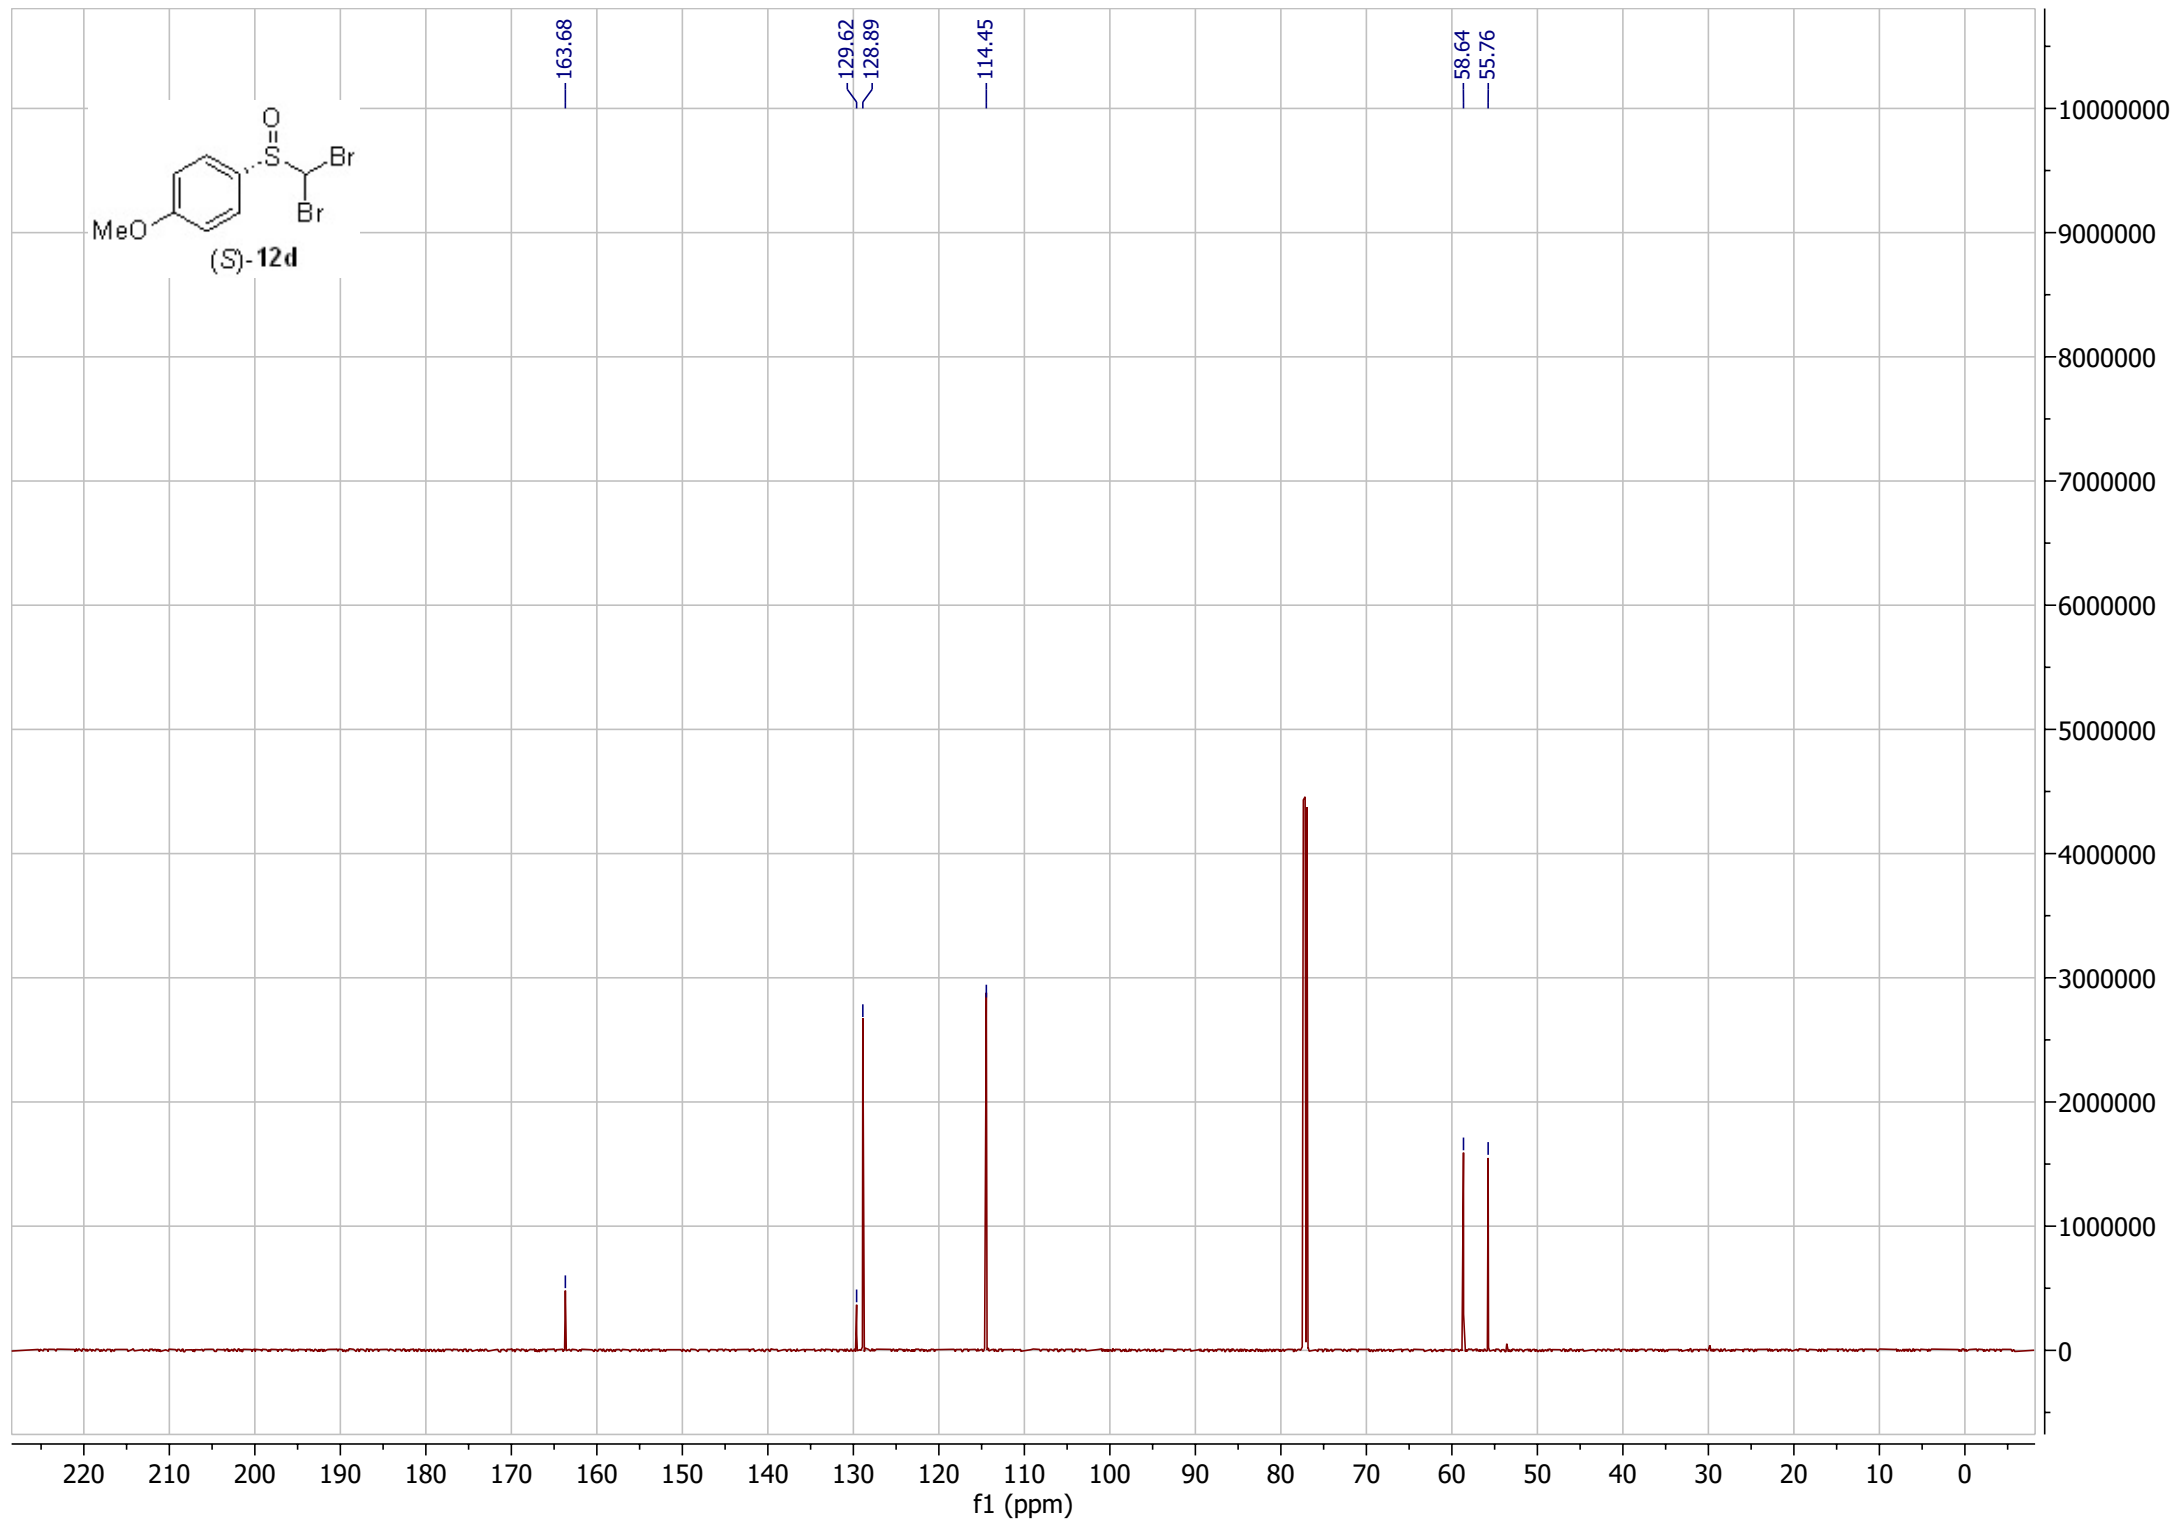

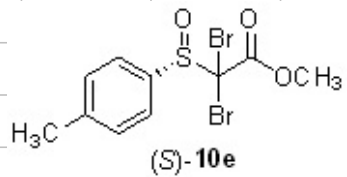

7.75  
7.75  
7.74  
7.73  
7.73  
7.72  
7.35  
7.35  
7.35  
7.34  
7.33  
7.33  
7.33  
7.33  
7.32

3.90

2.44

2.00

2.12

3.35

3.37

f1 (ppm)

13 12 11 10 9 8 7 6 5 4 3 2 1 0 -1

2500000  
2400000  
2300000  
2200000  
2100000  
2000000  
1900000  
1800000  
1700000  
1600000  
1500000  
1400000  
1300000  
1200000  
1100000  
1000000  
900000  
800000  
700000  
600000  
500000  
400000  
300000  
200000  
100000  
0  
-100000  
-200000

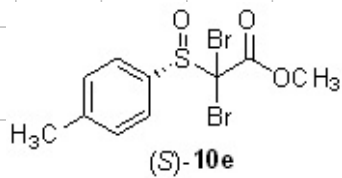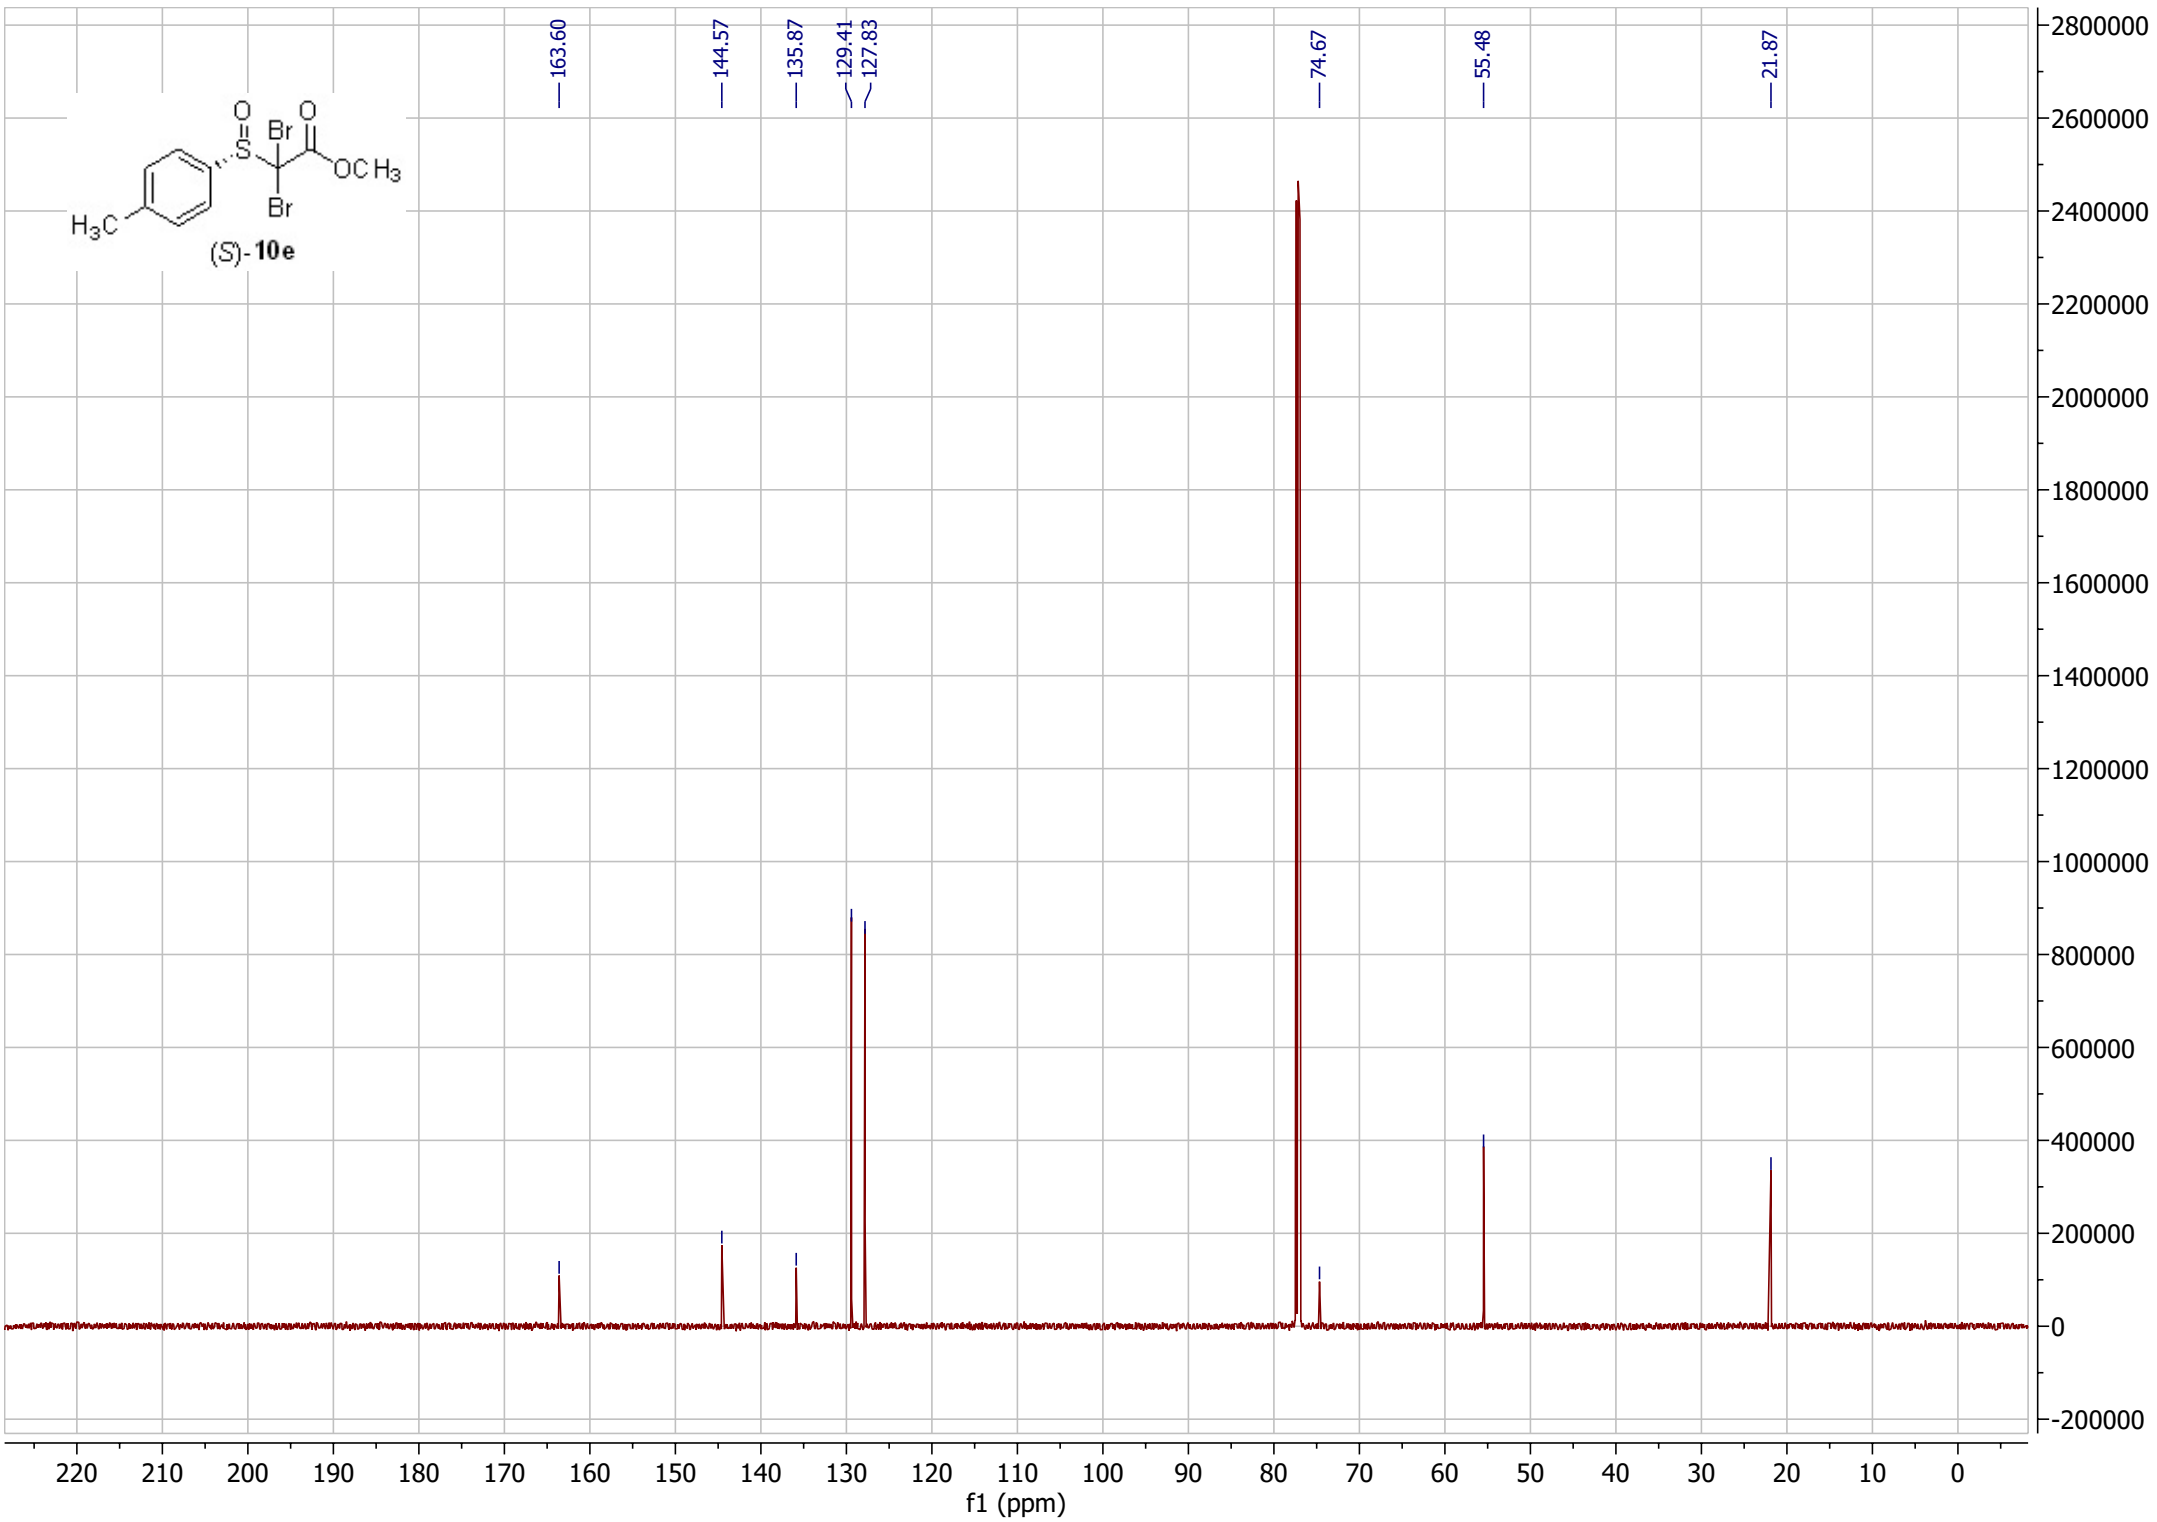



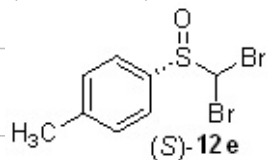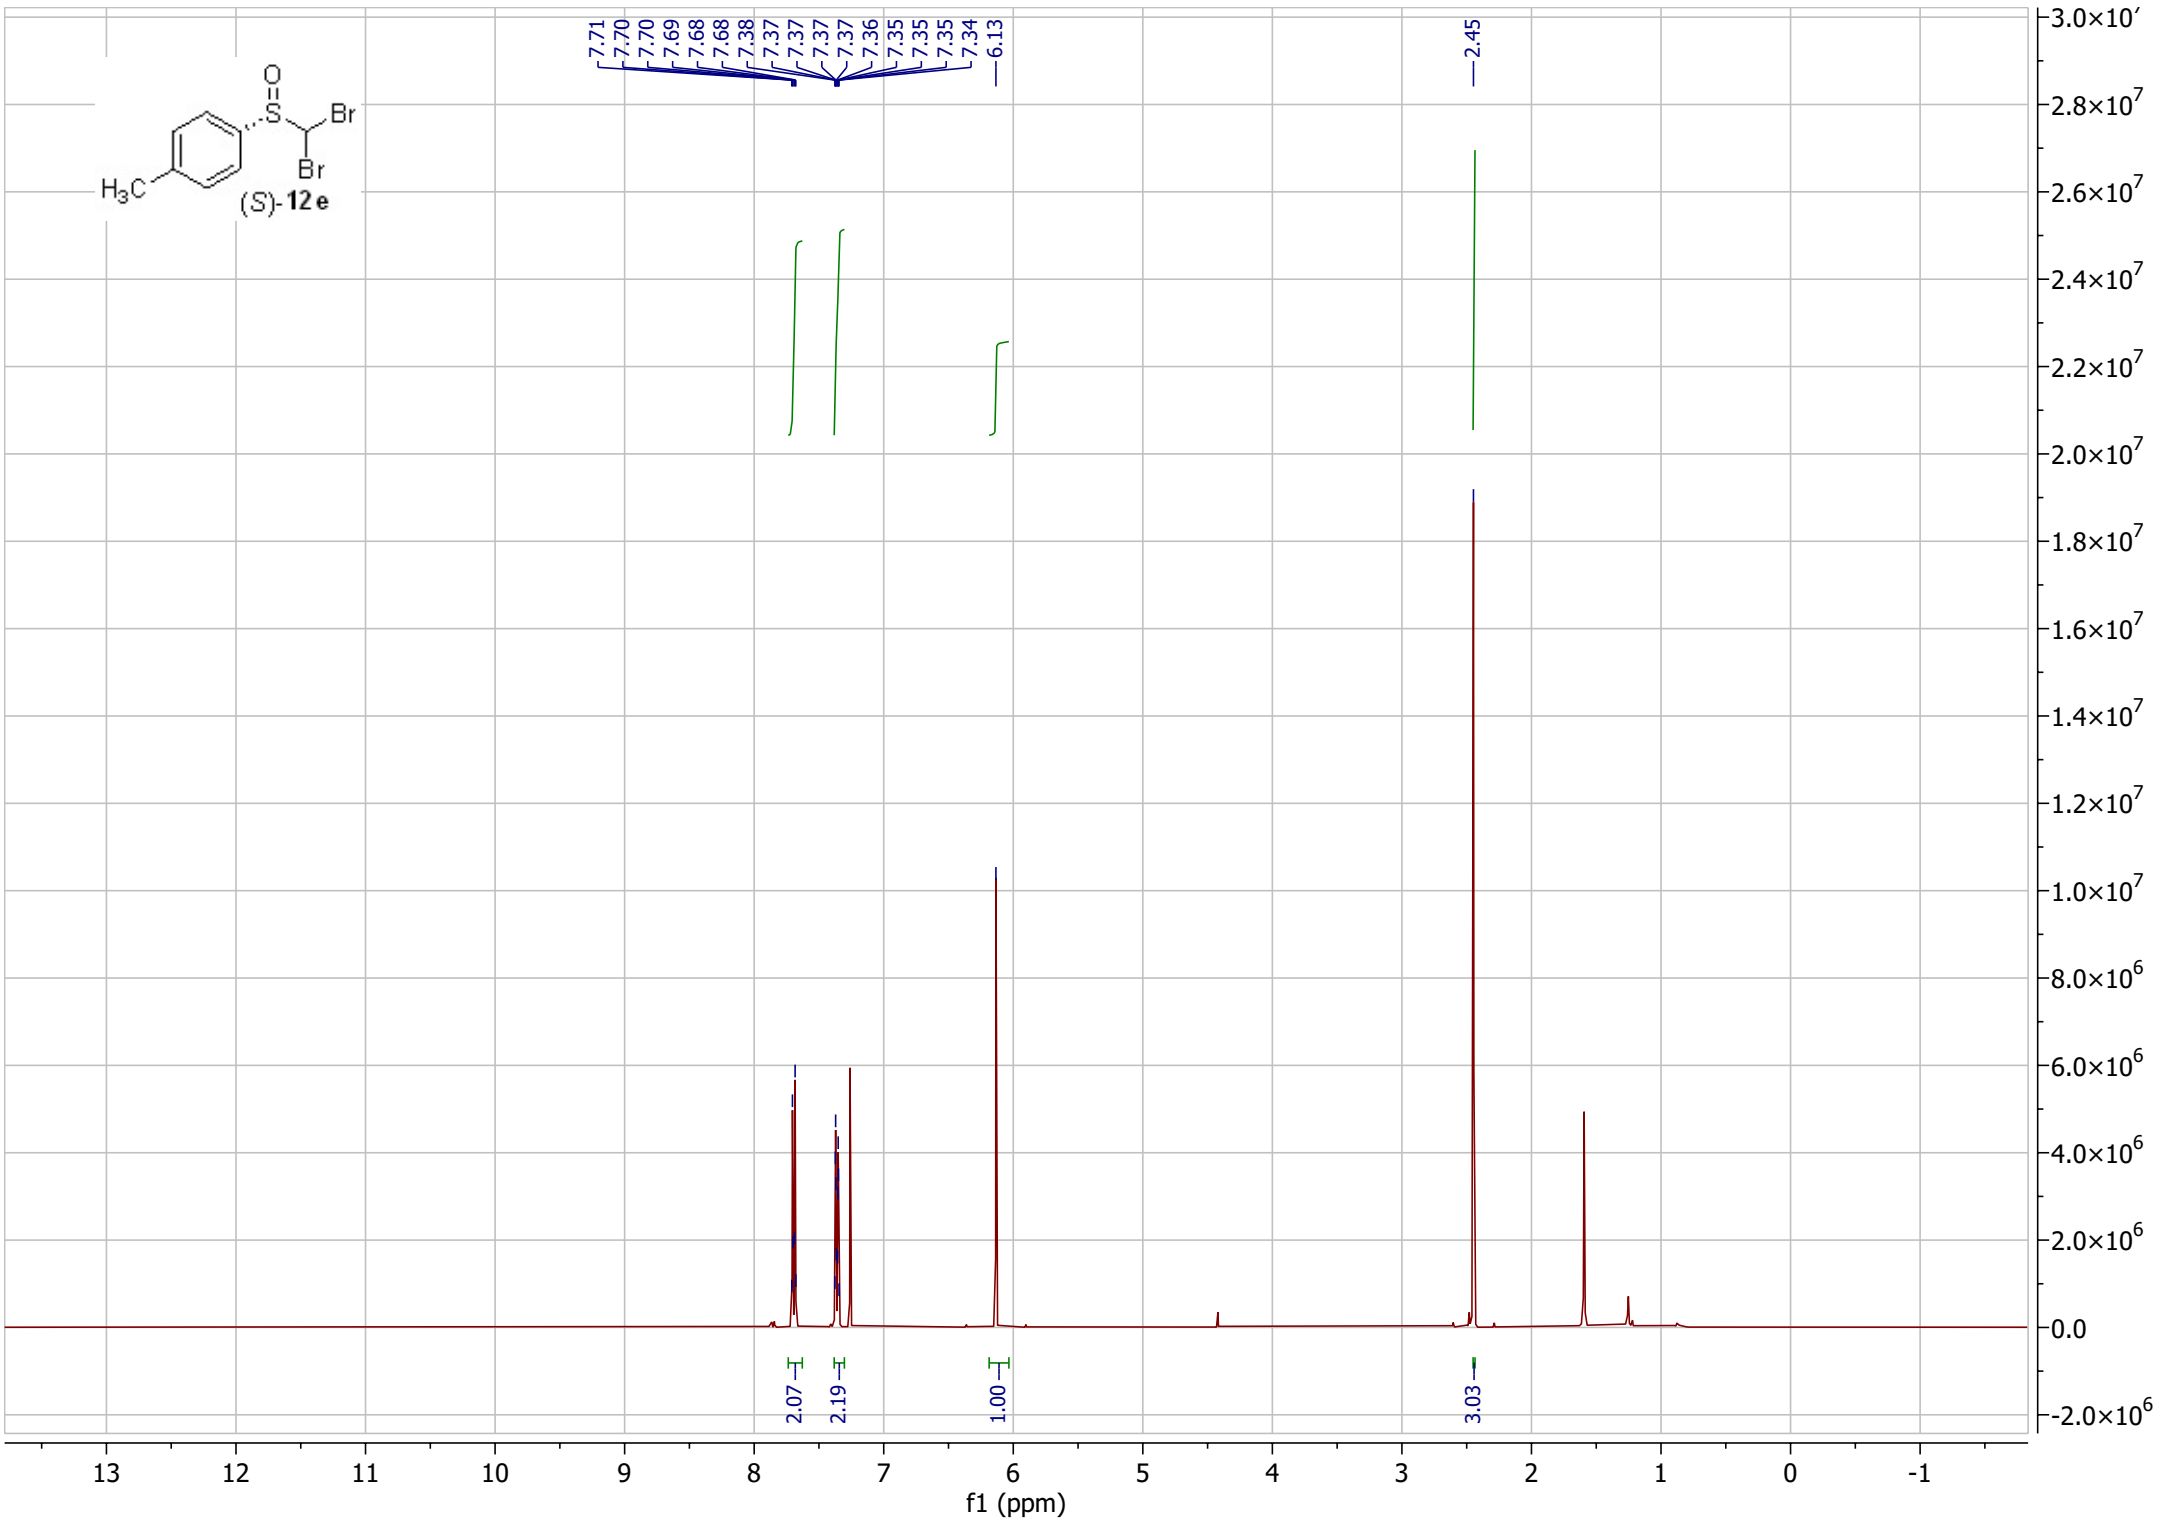

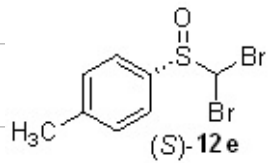

— 144.08

— 135.86

— 129.70

— 126.88

— 58.17

— 21.82

220 210 200 190 180 170 160 150 140 130 120 110 100 90 80 70 60 50 40 30 20 10 0

f1 (ppm)

3000000  
2800000  
2600000  
2400000  
2200000  
2000000  
1800000  
1600000  
1400000  
1200000  
1000000  
800000  
600000  
400000  
200000  
0  
-200000

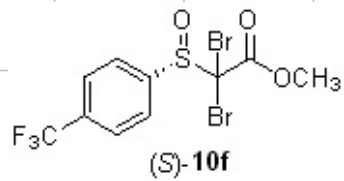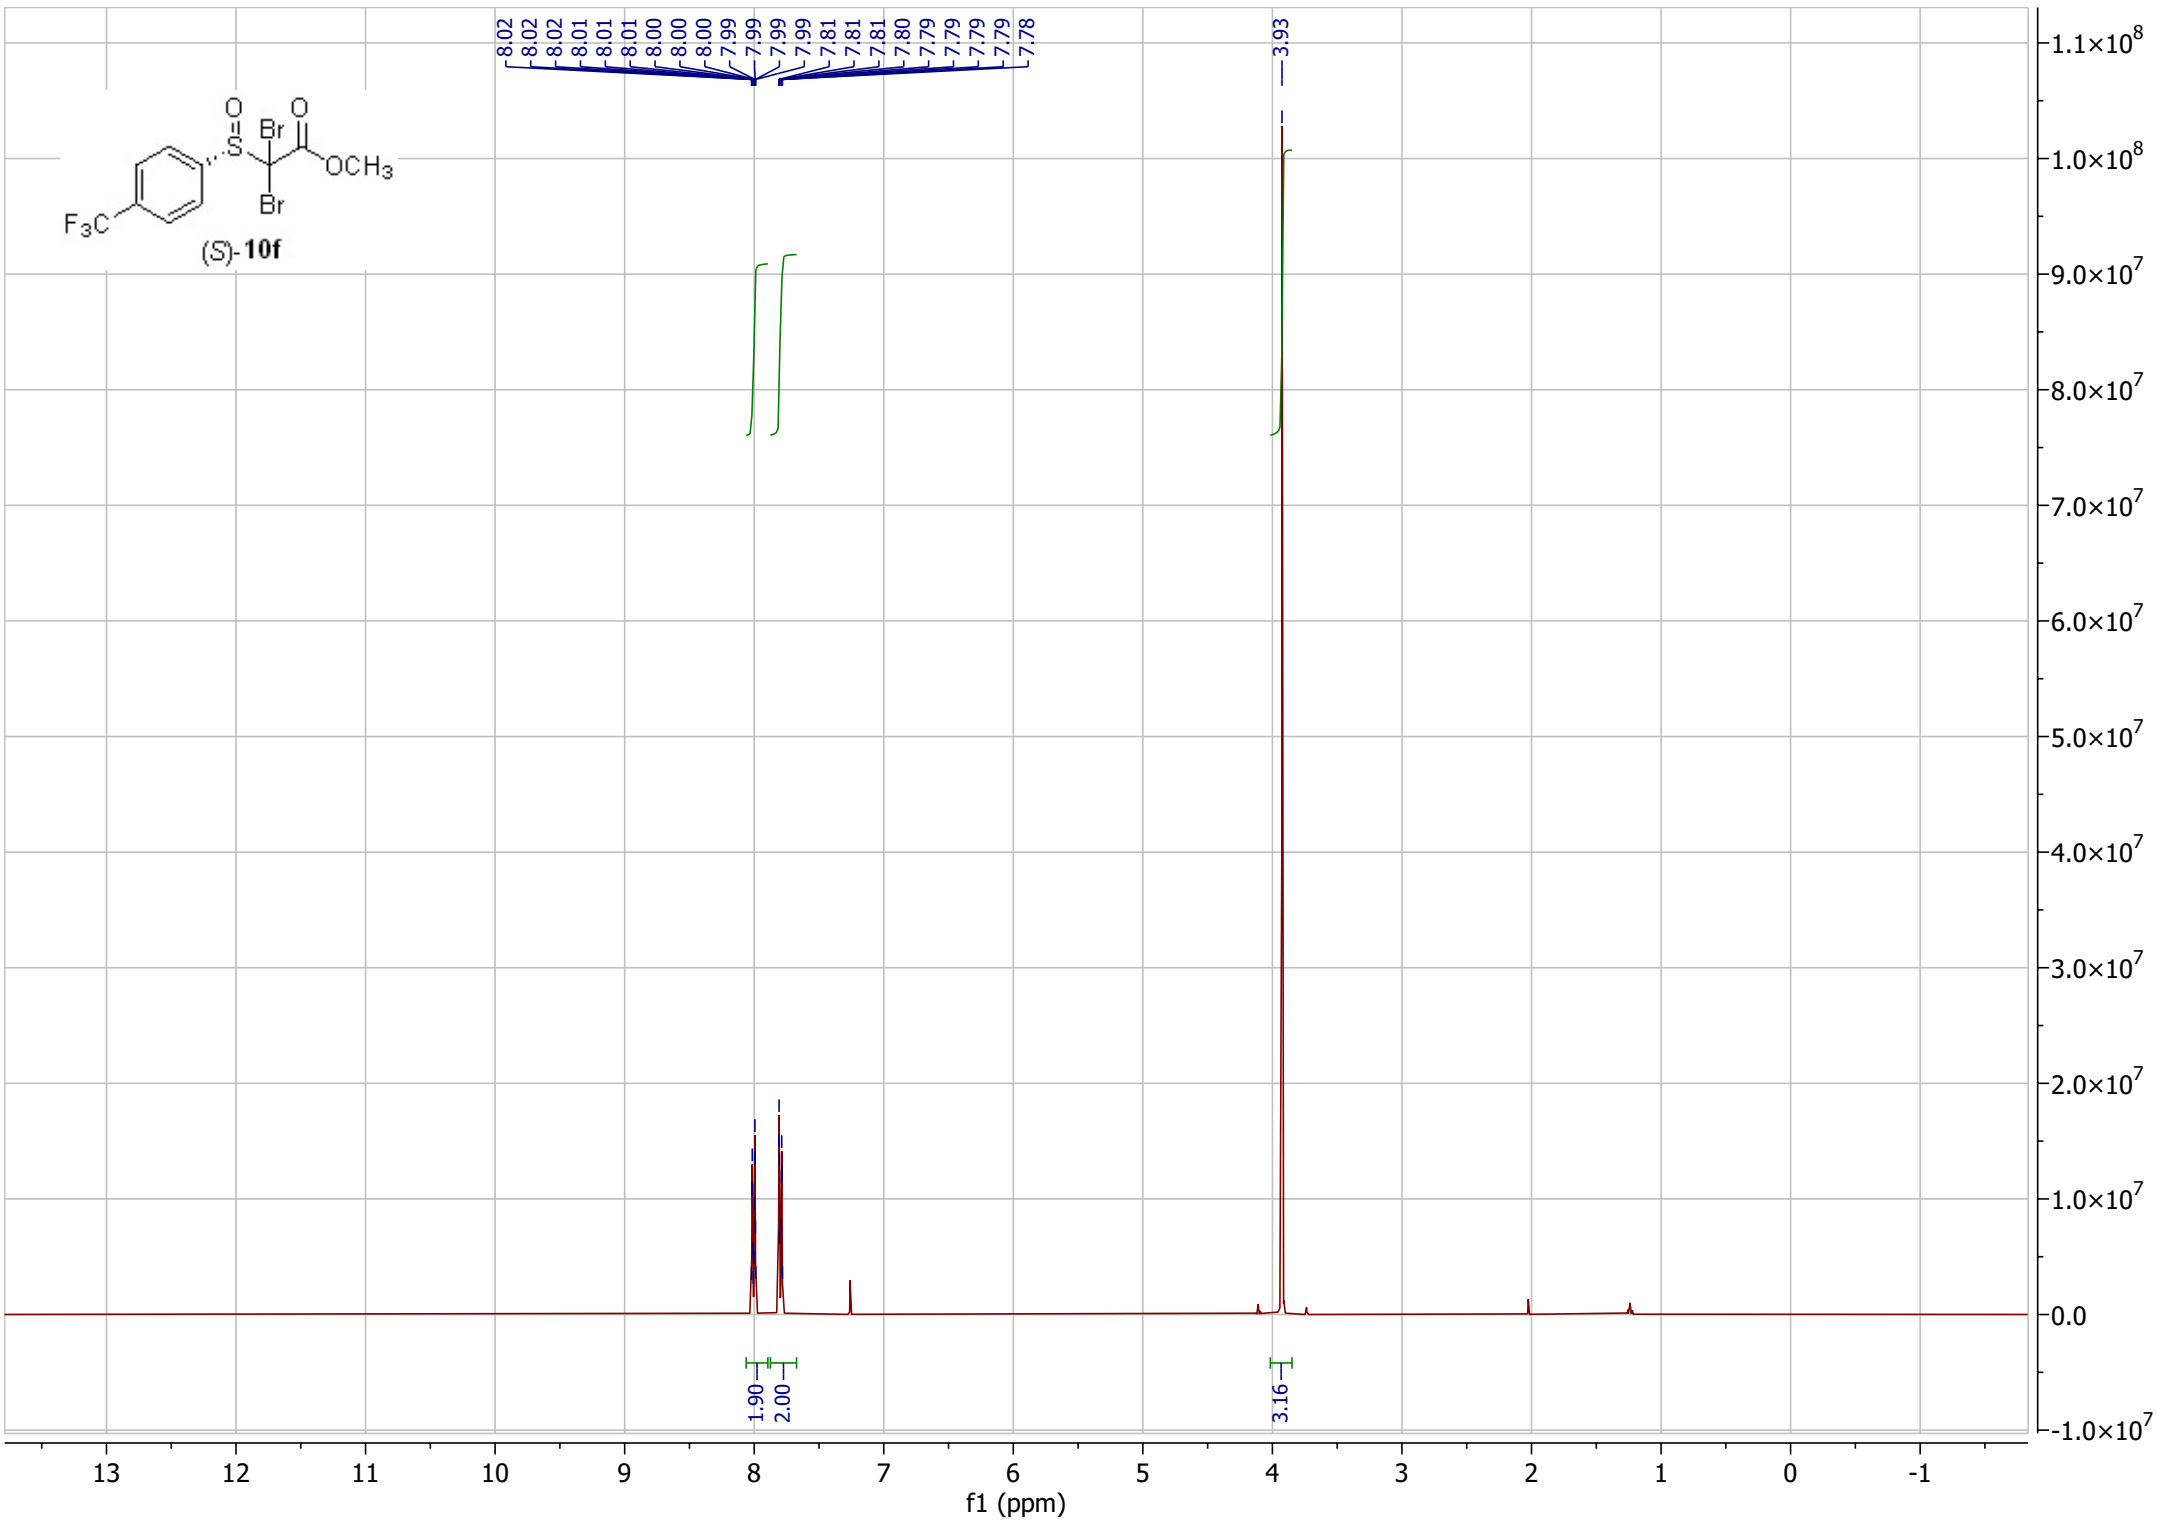

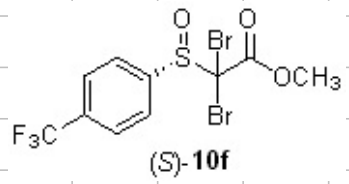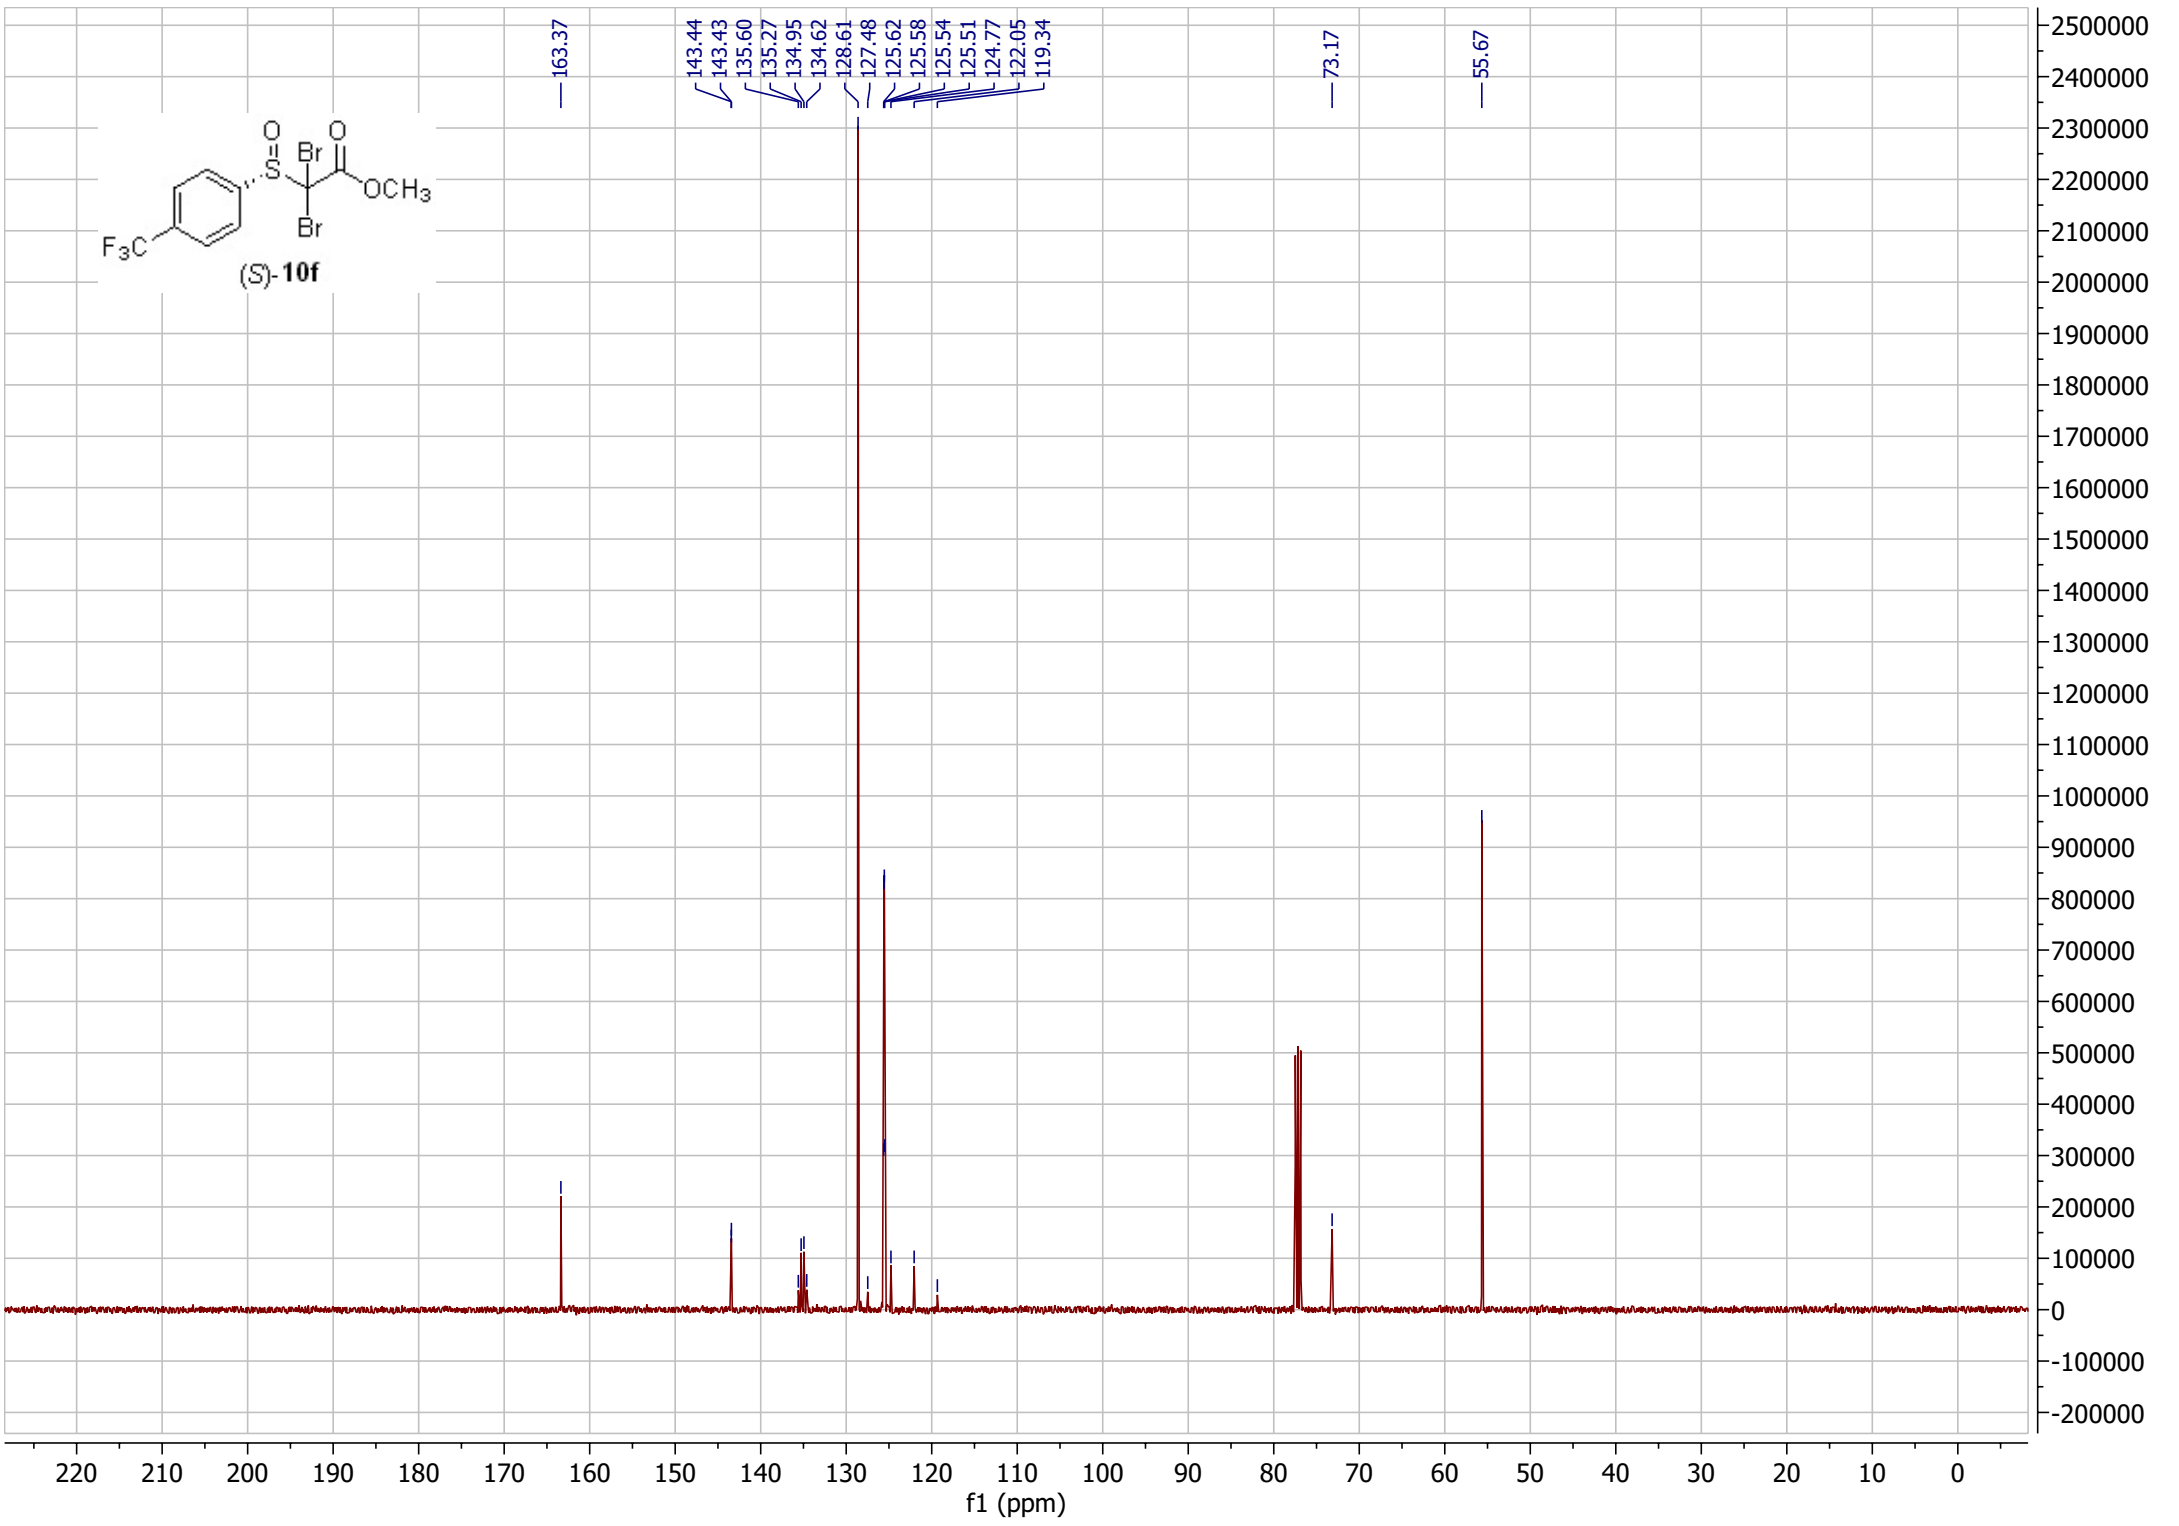

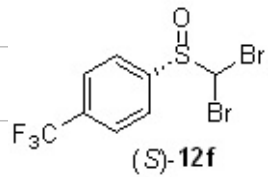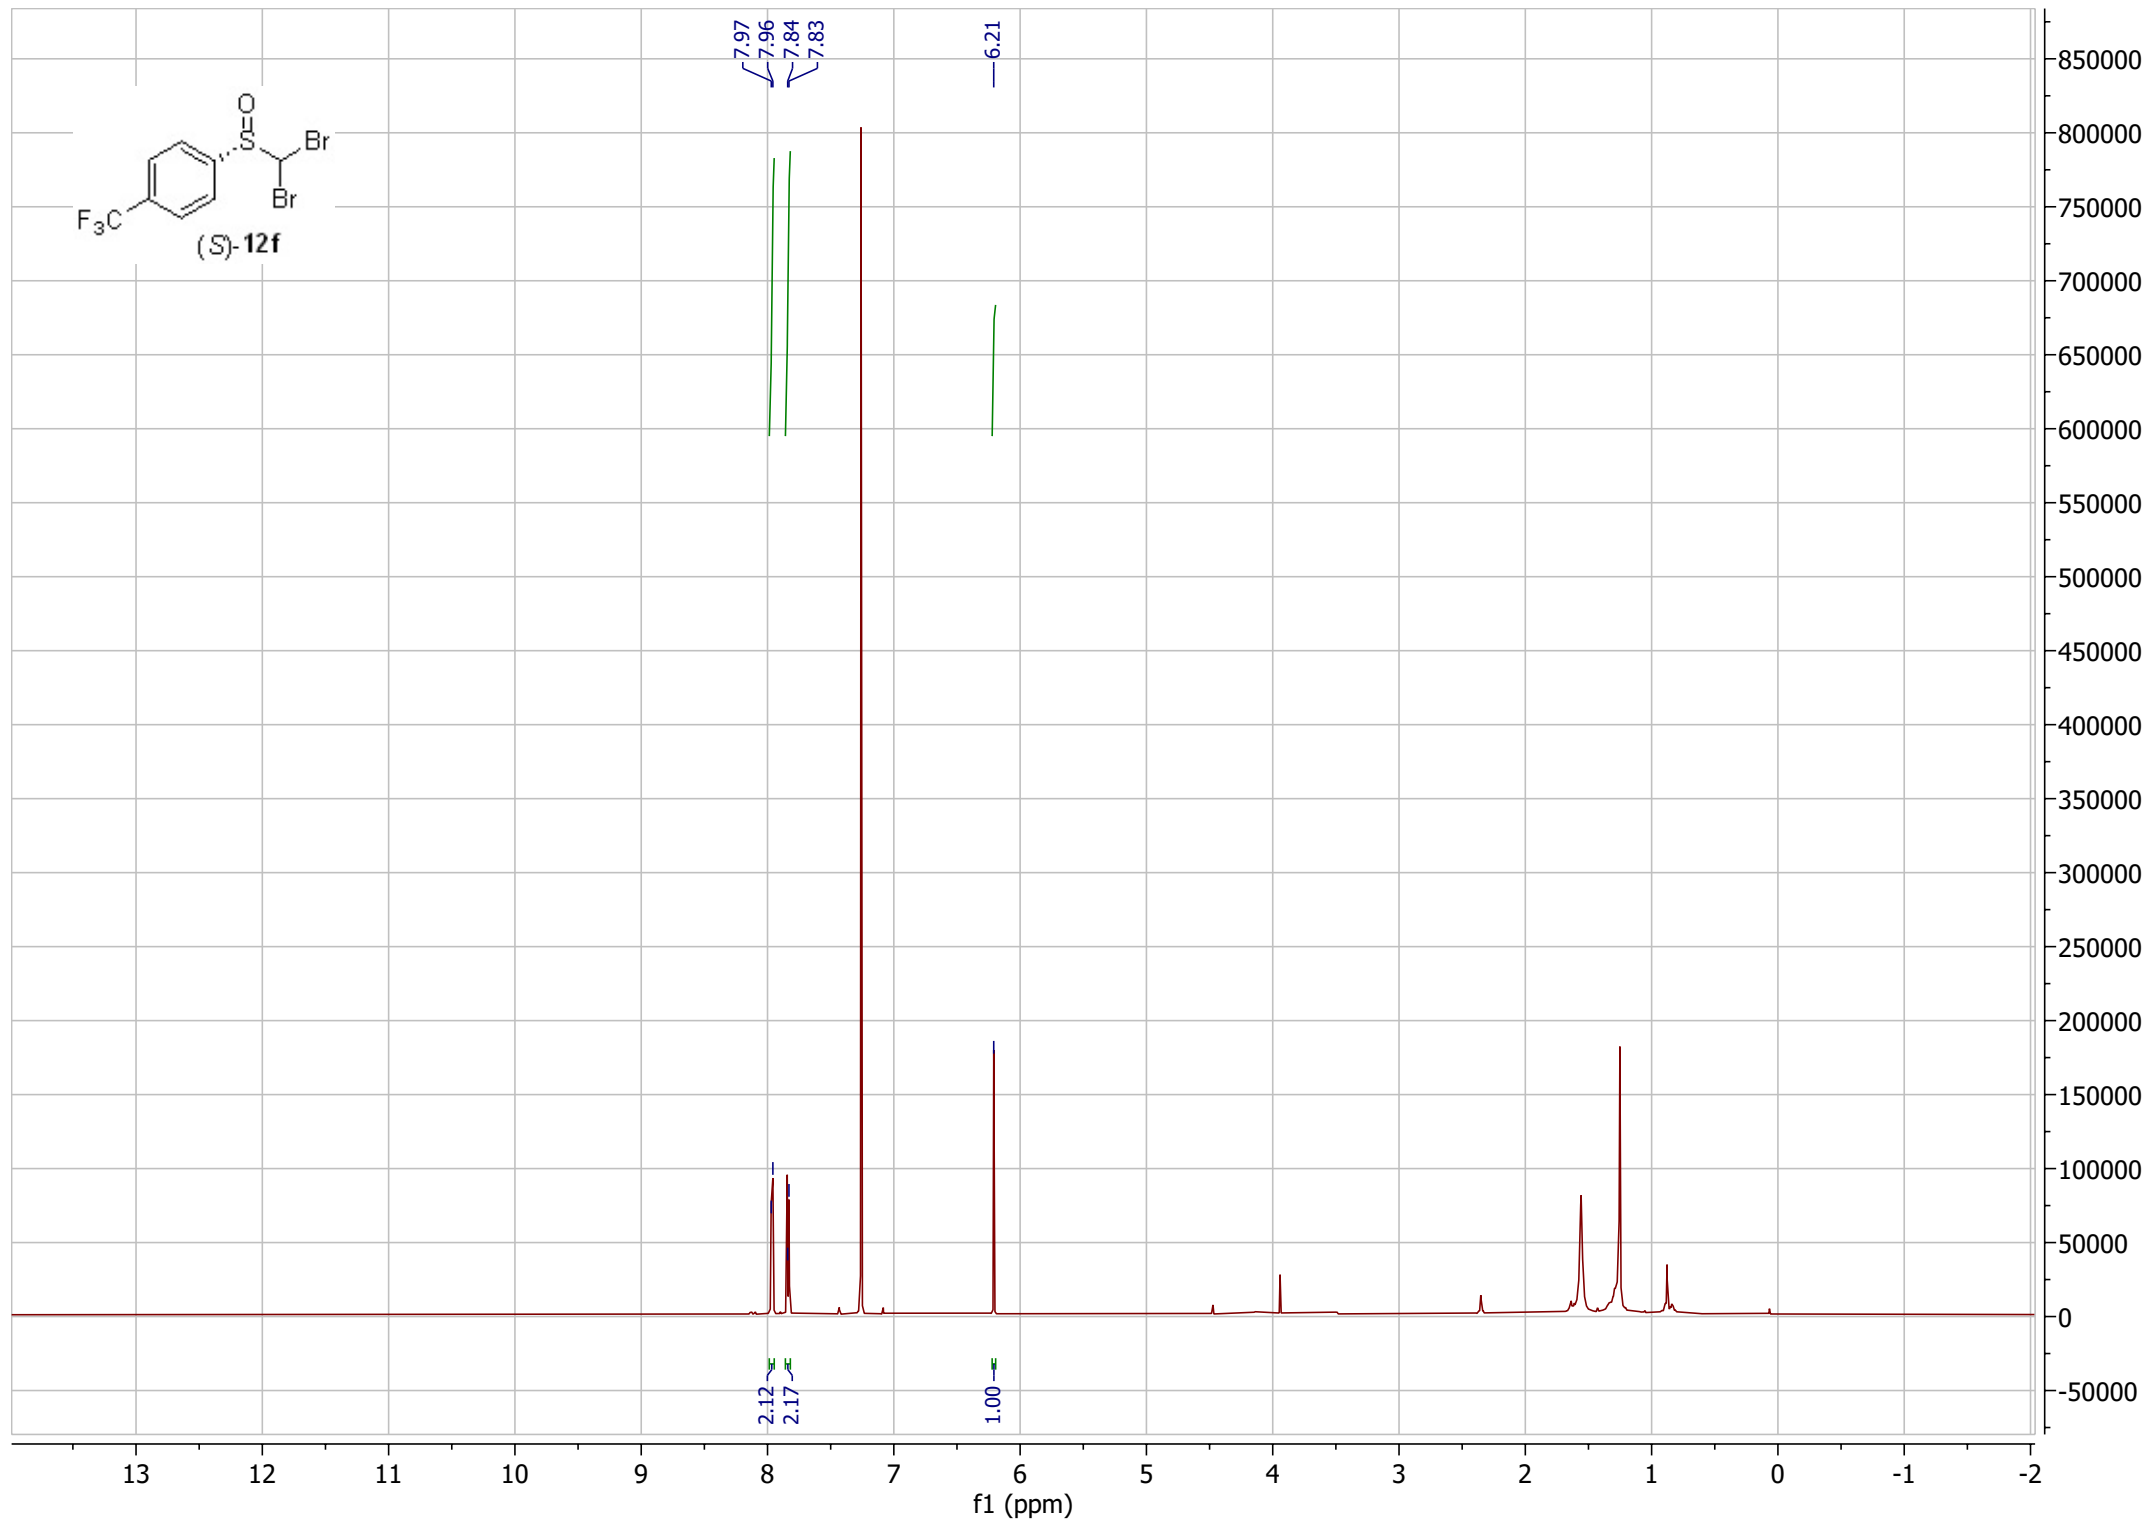

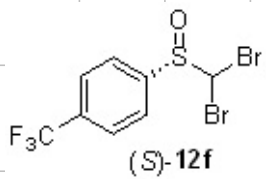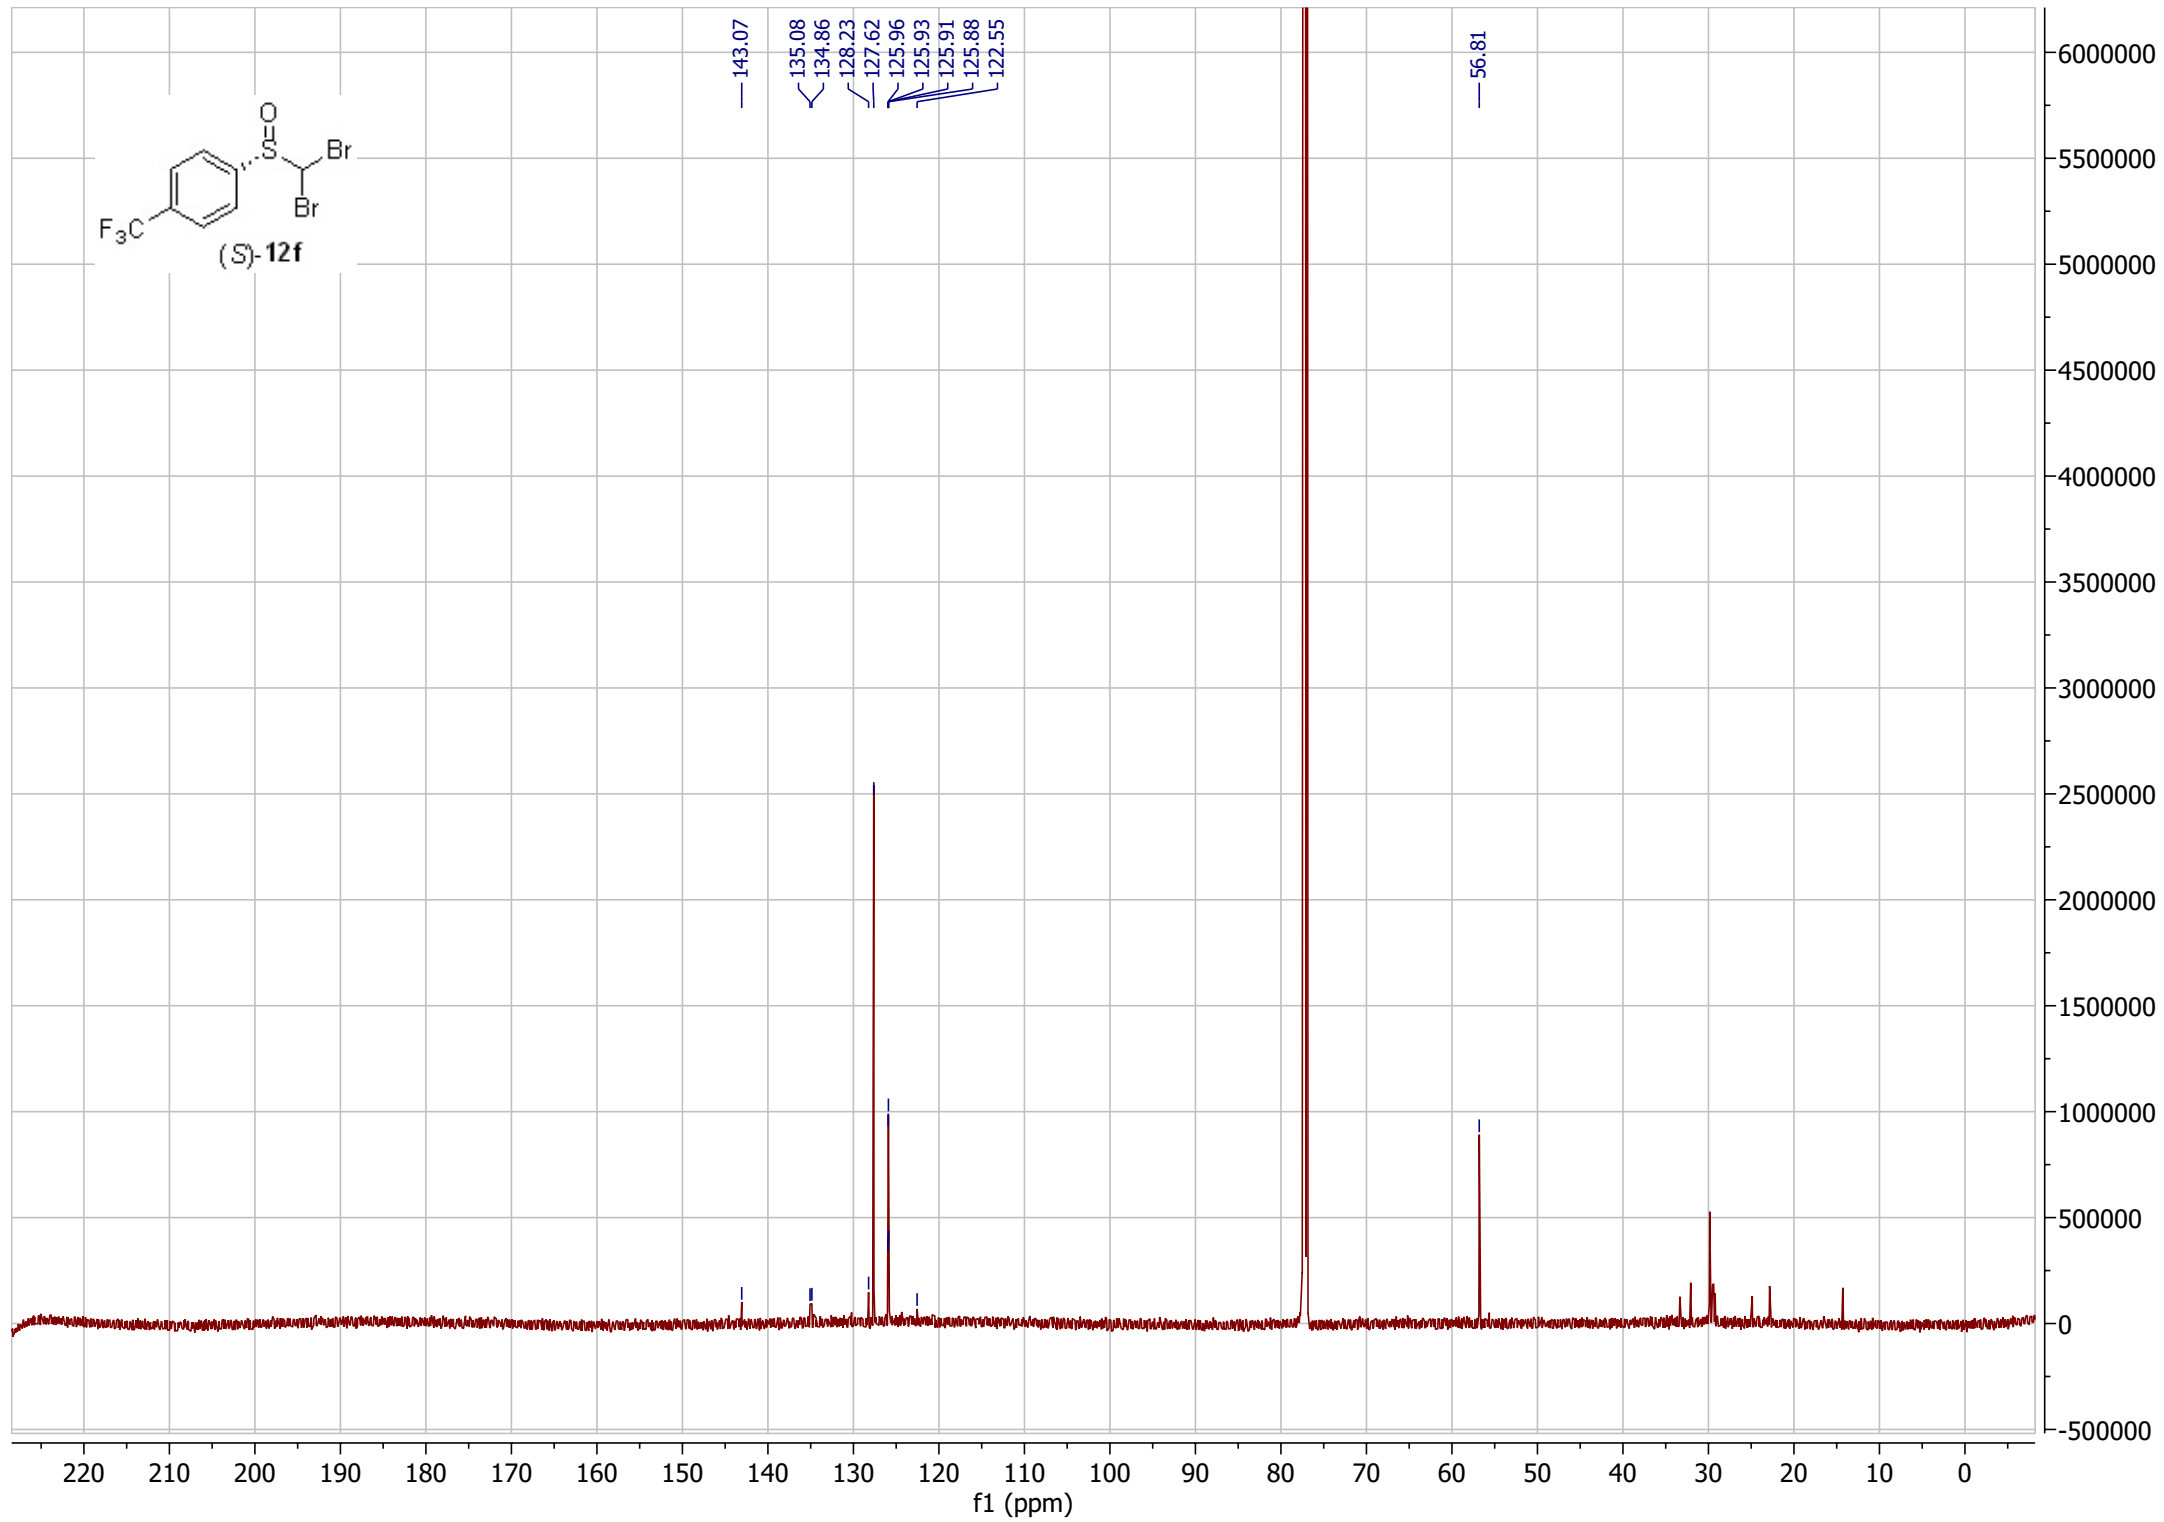

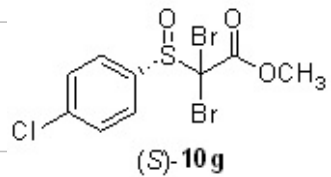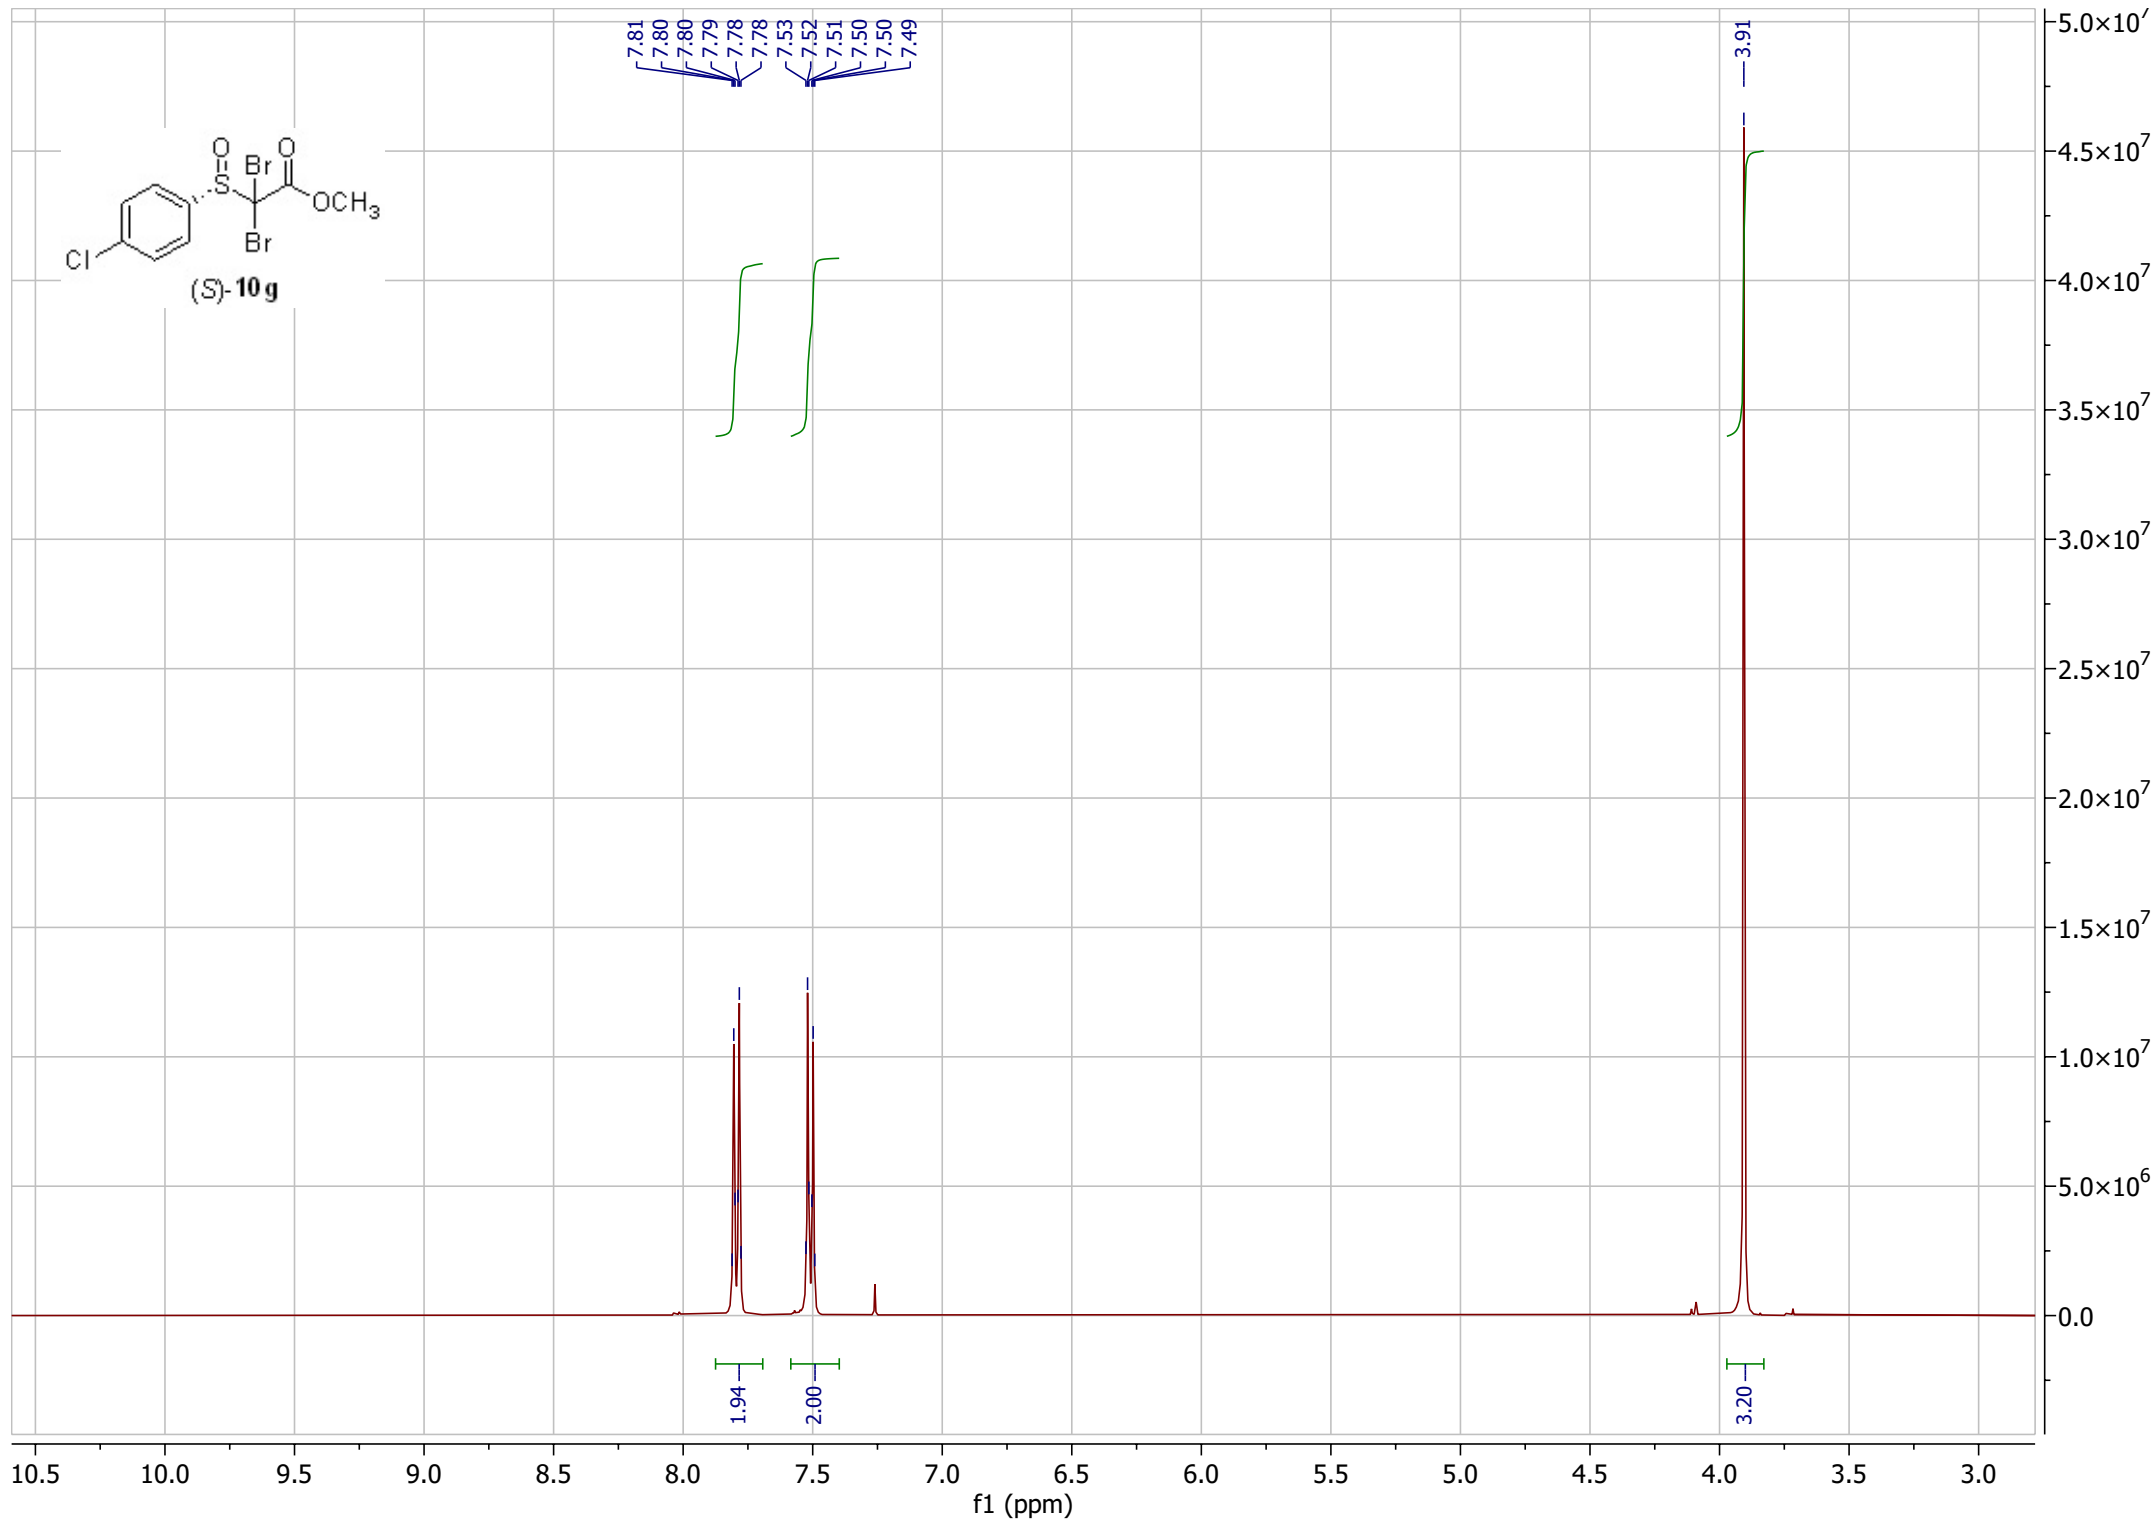

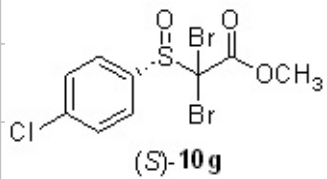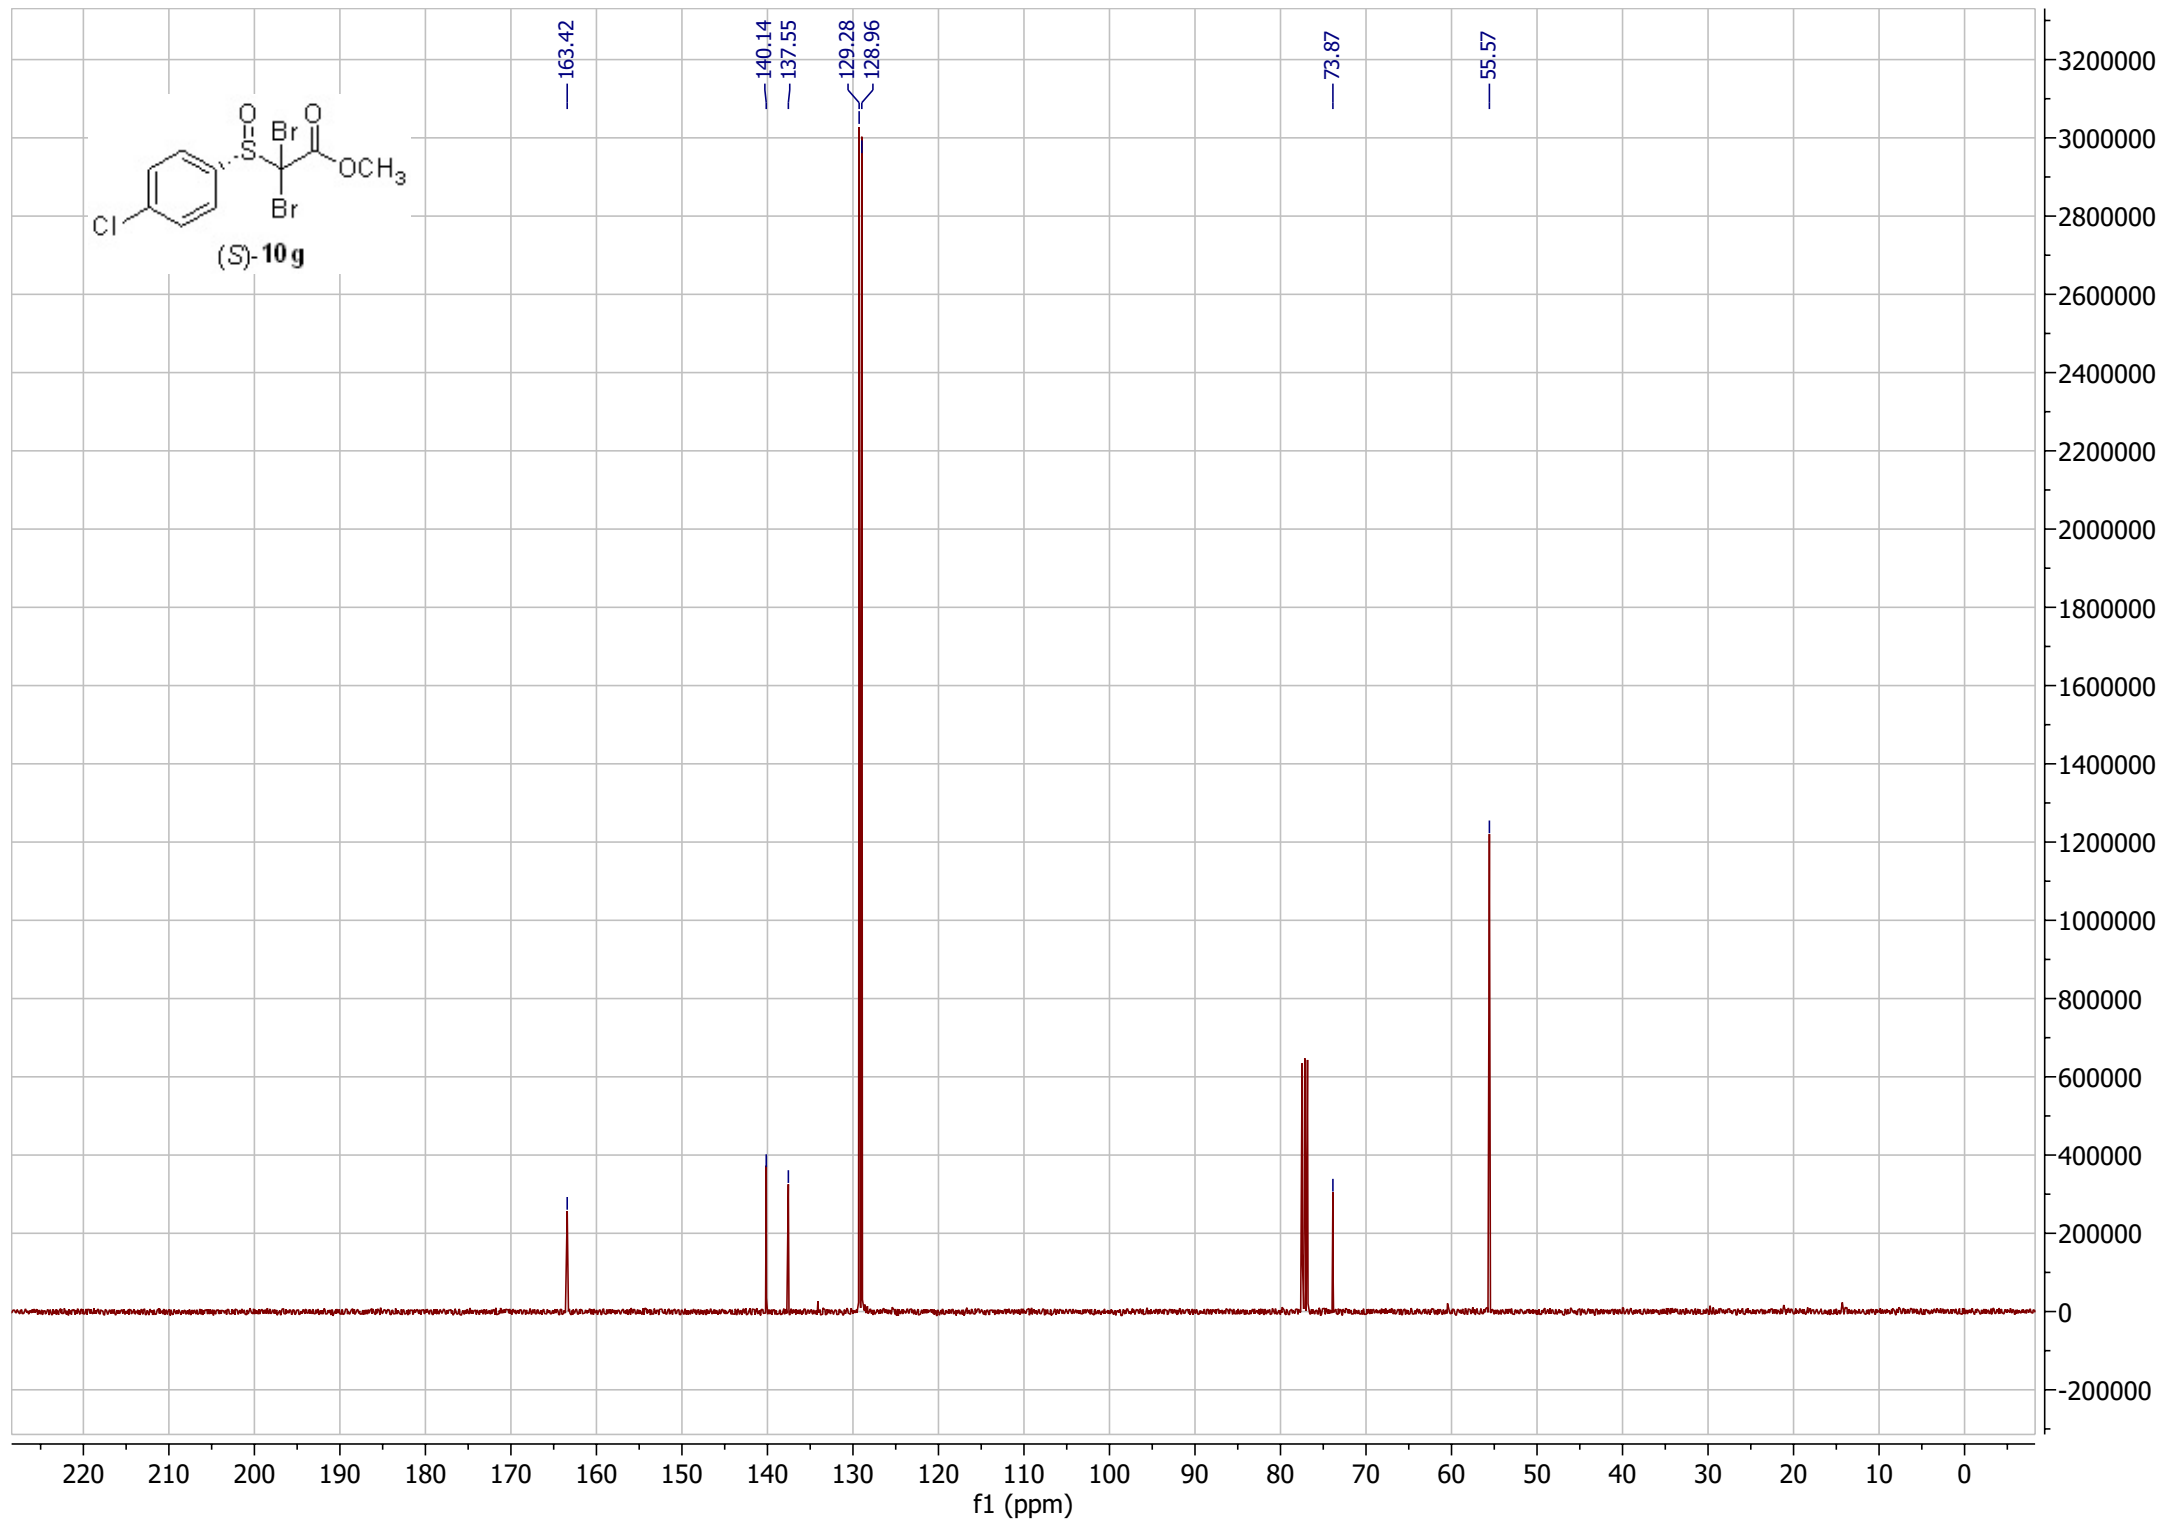



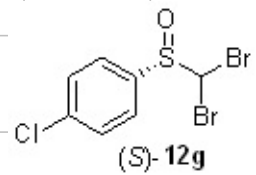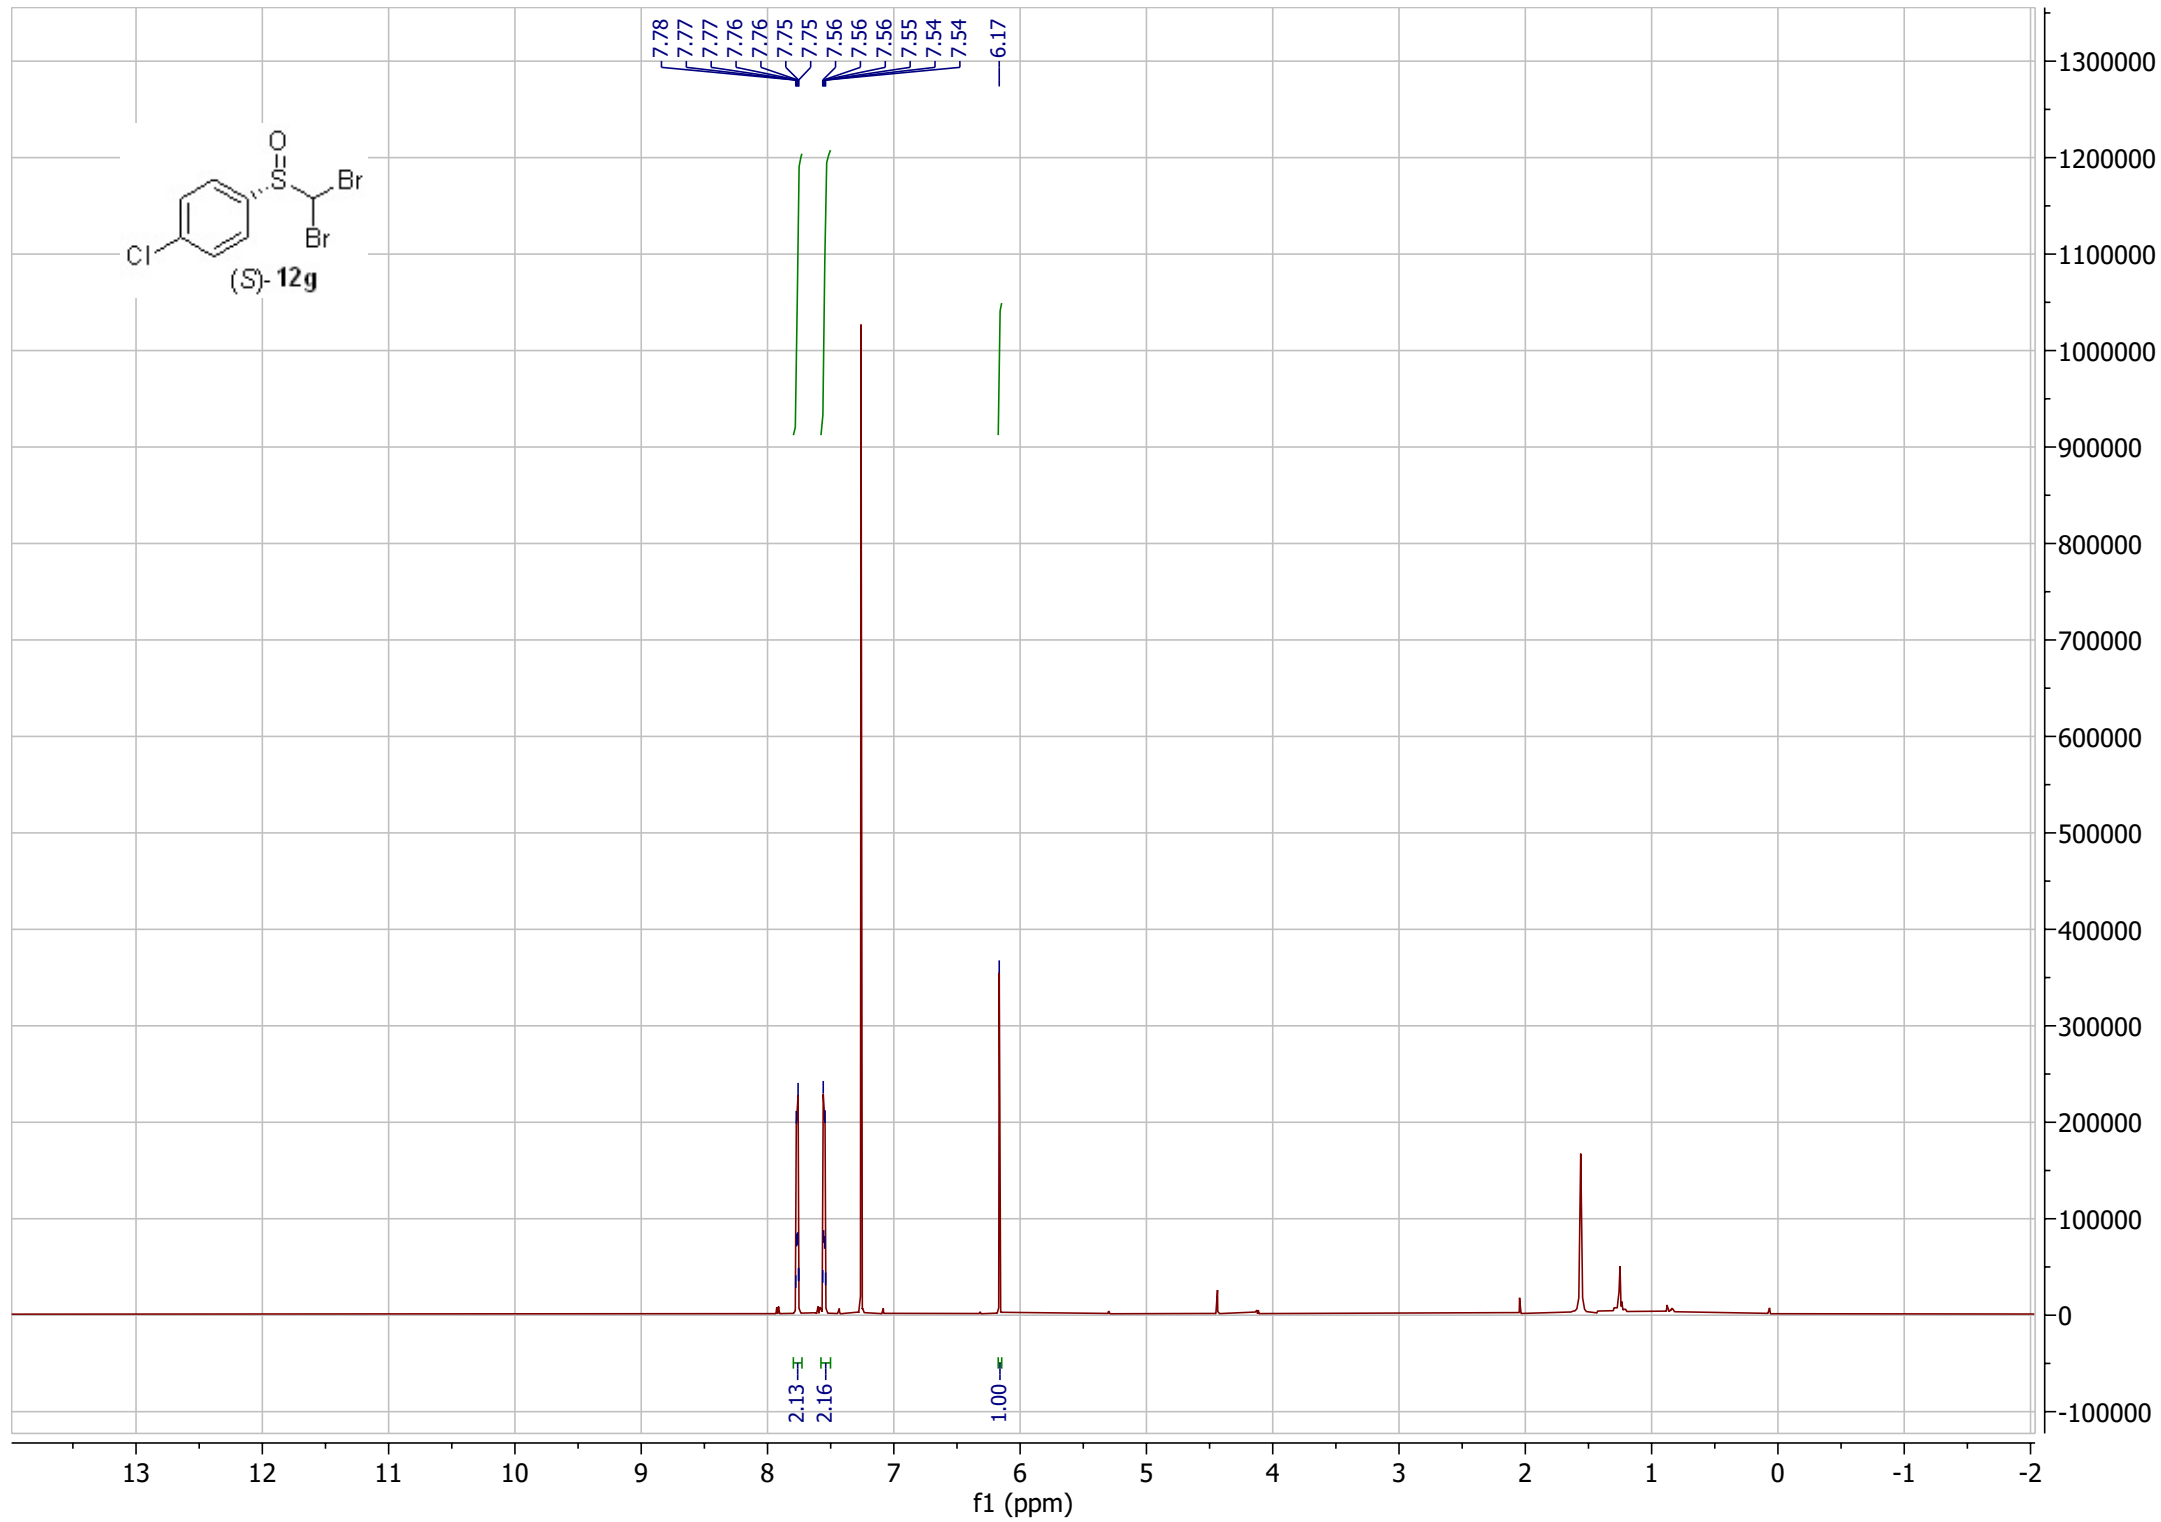

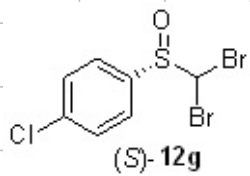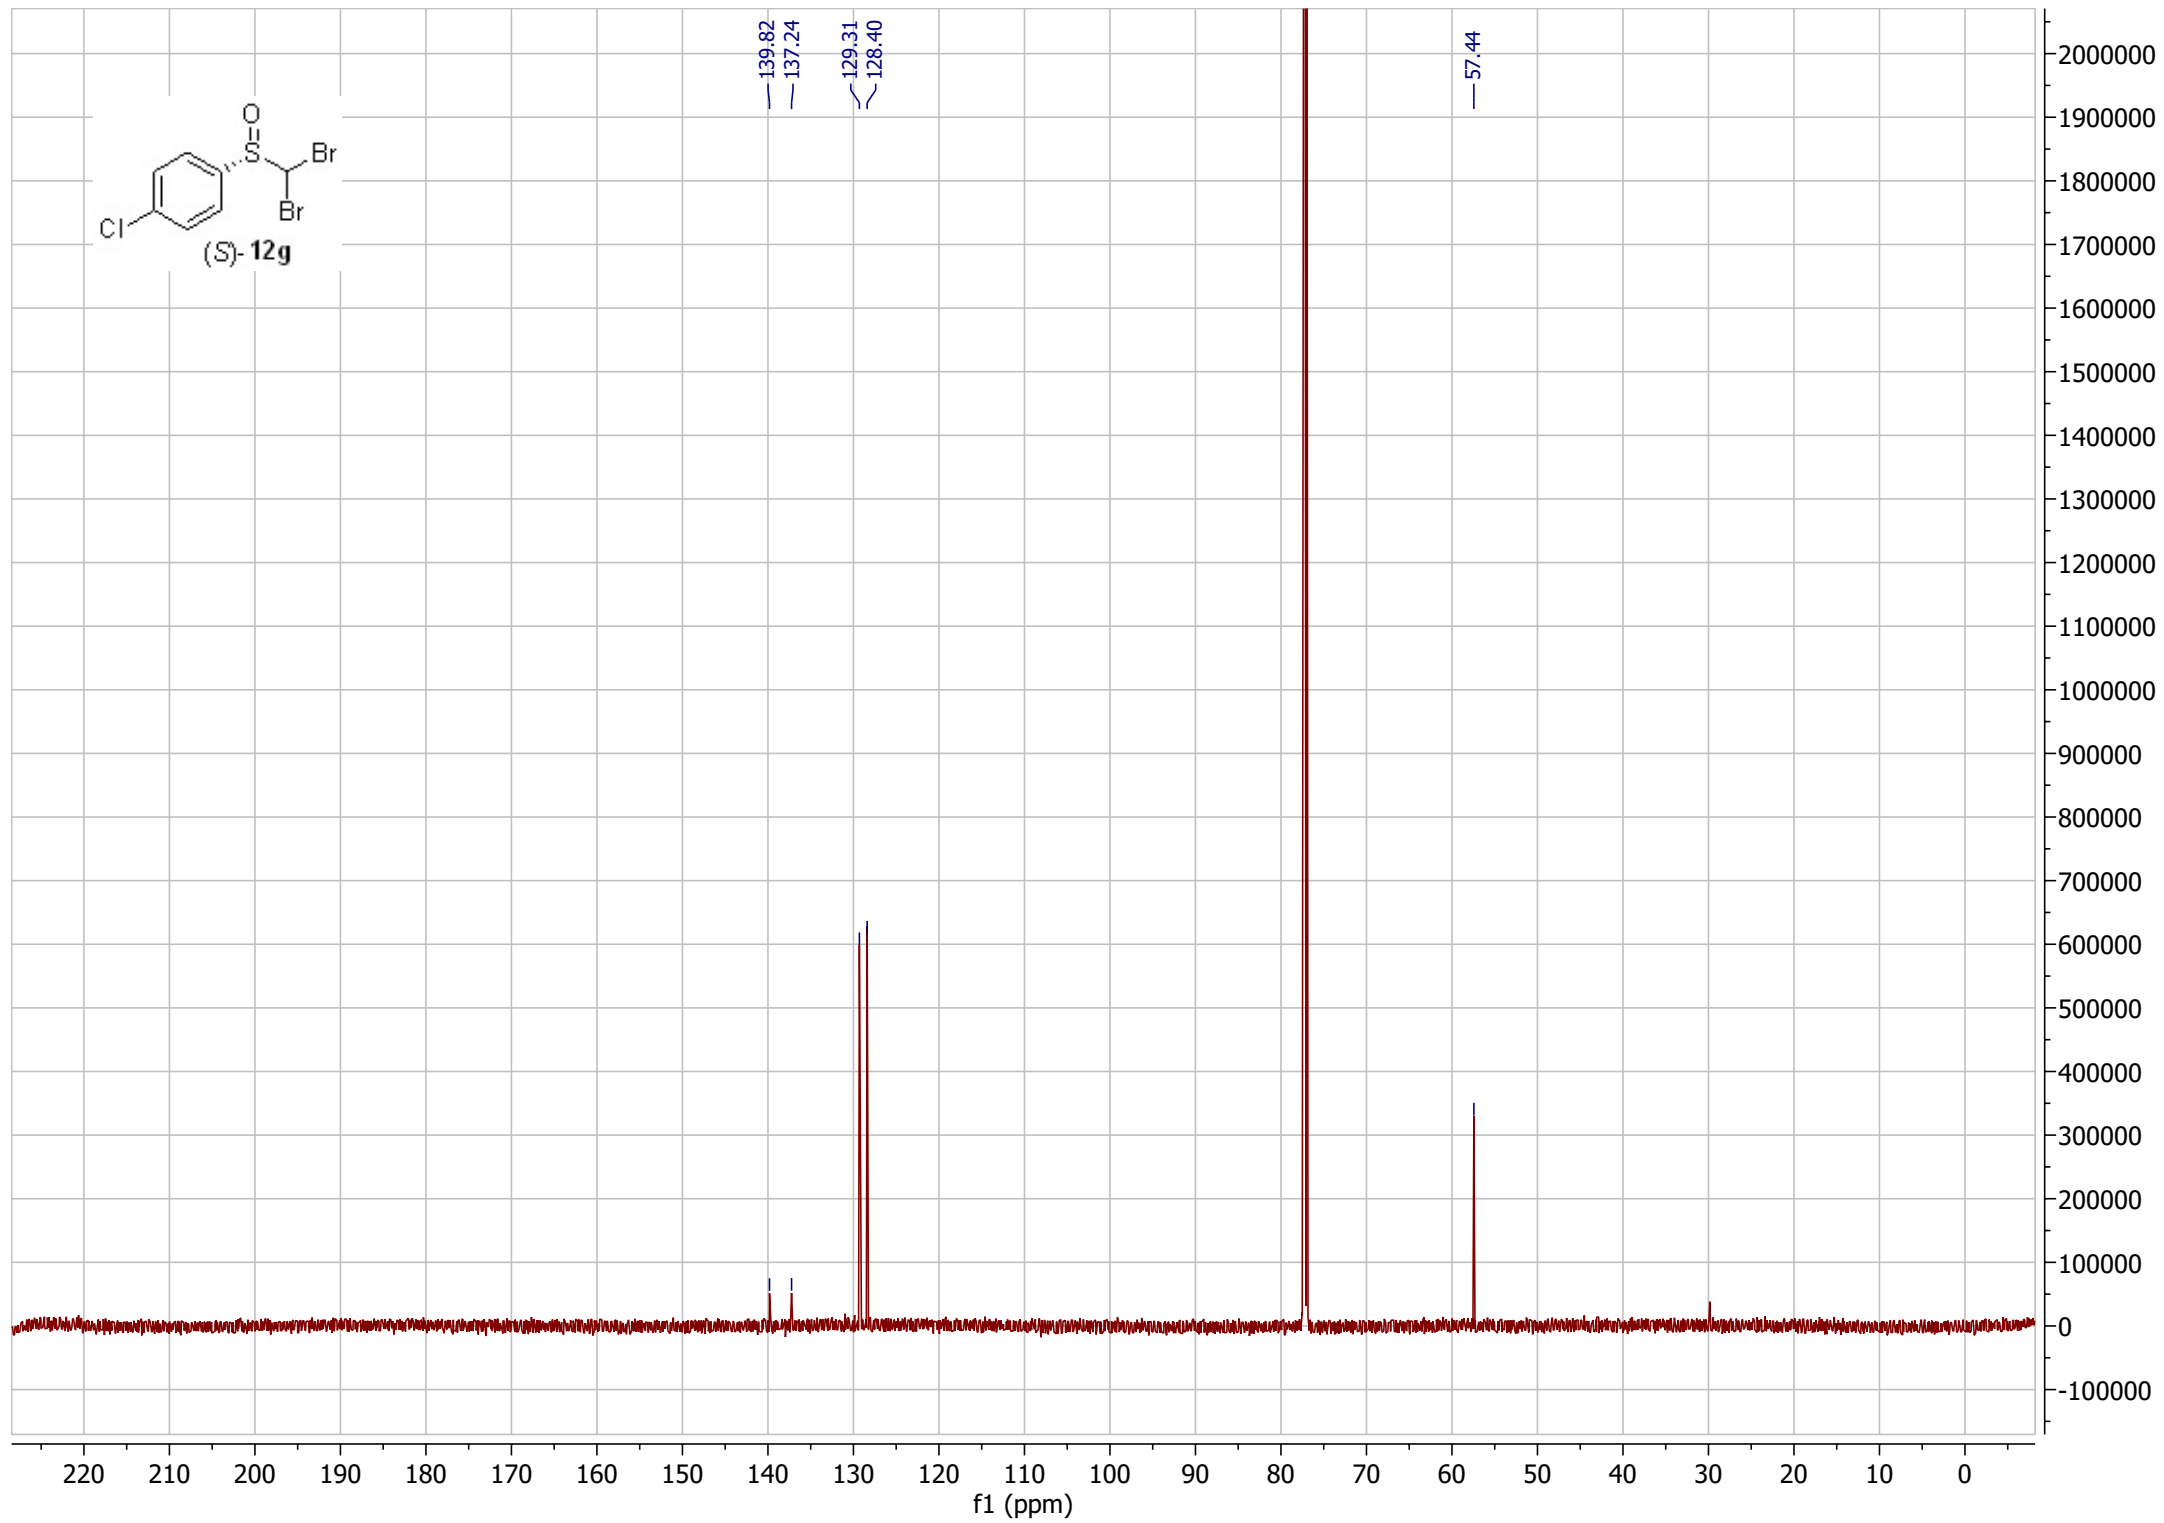

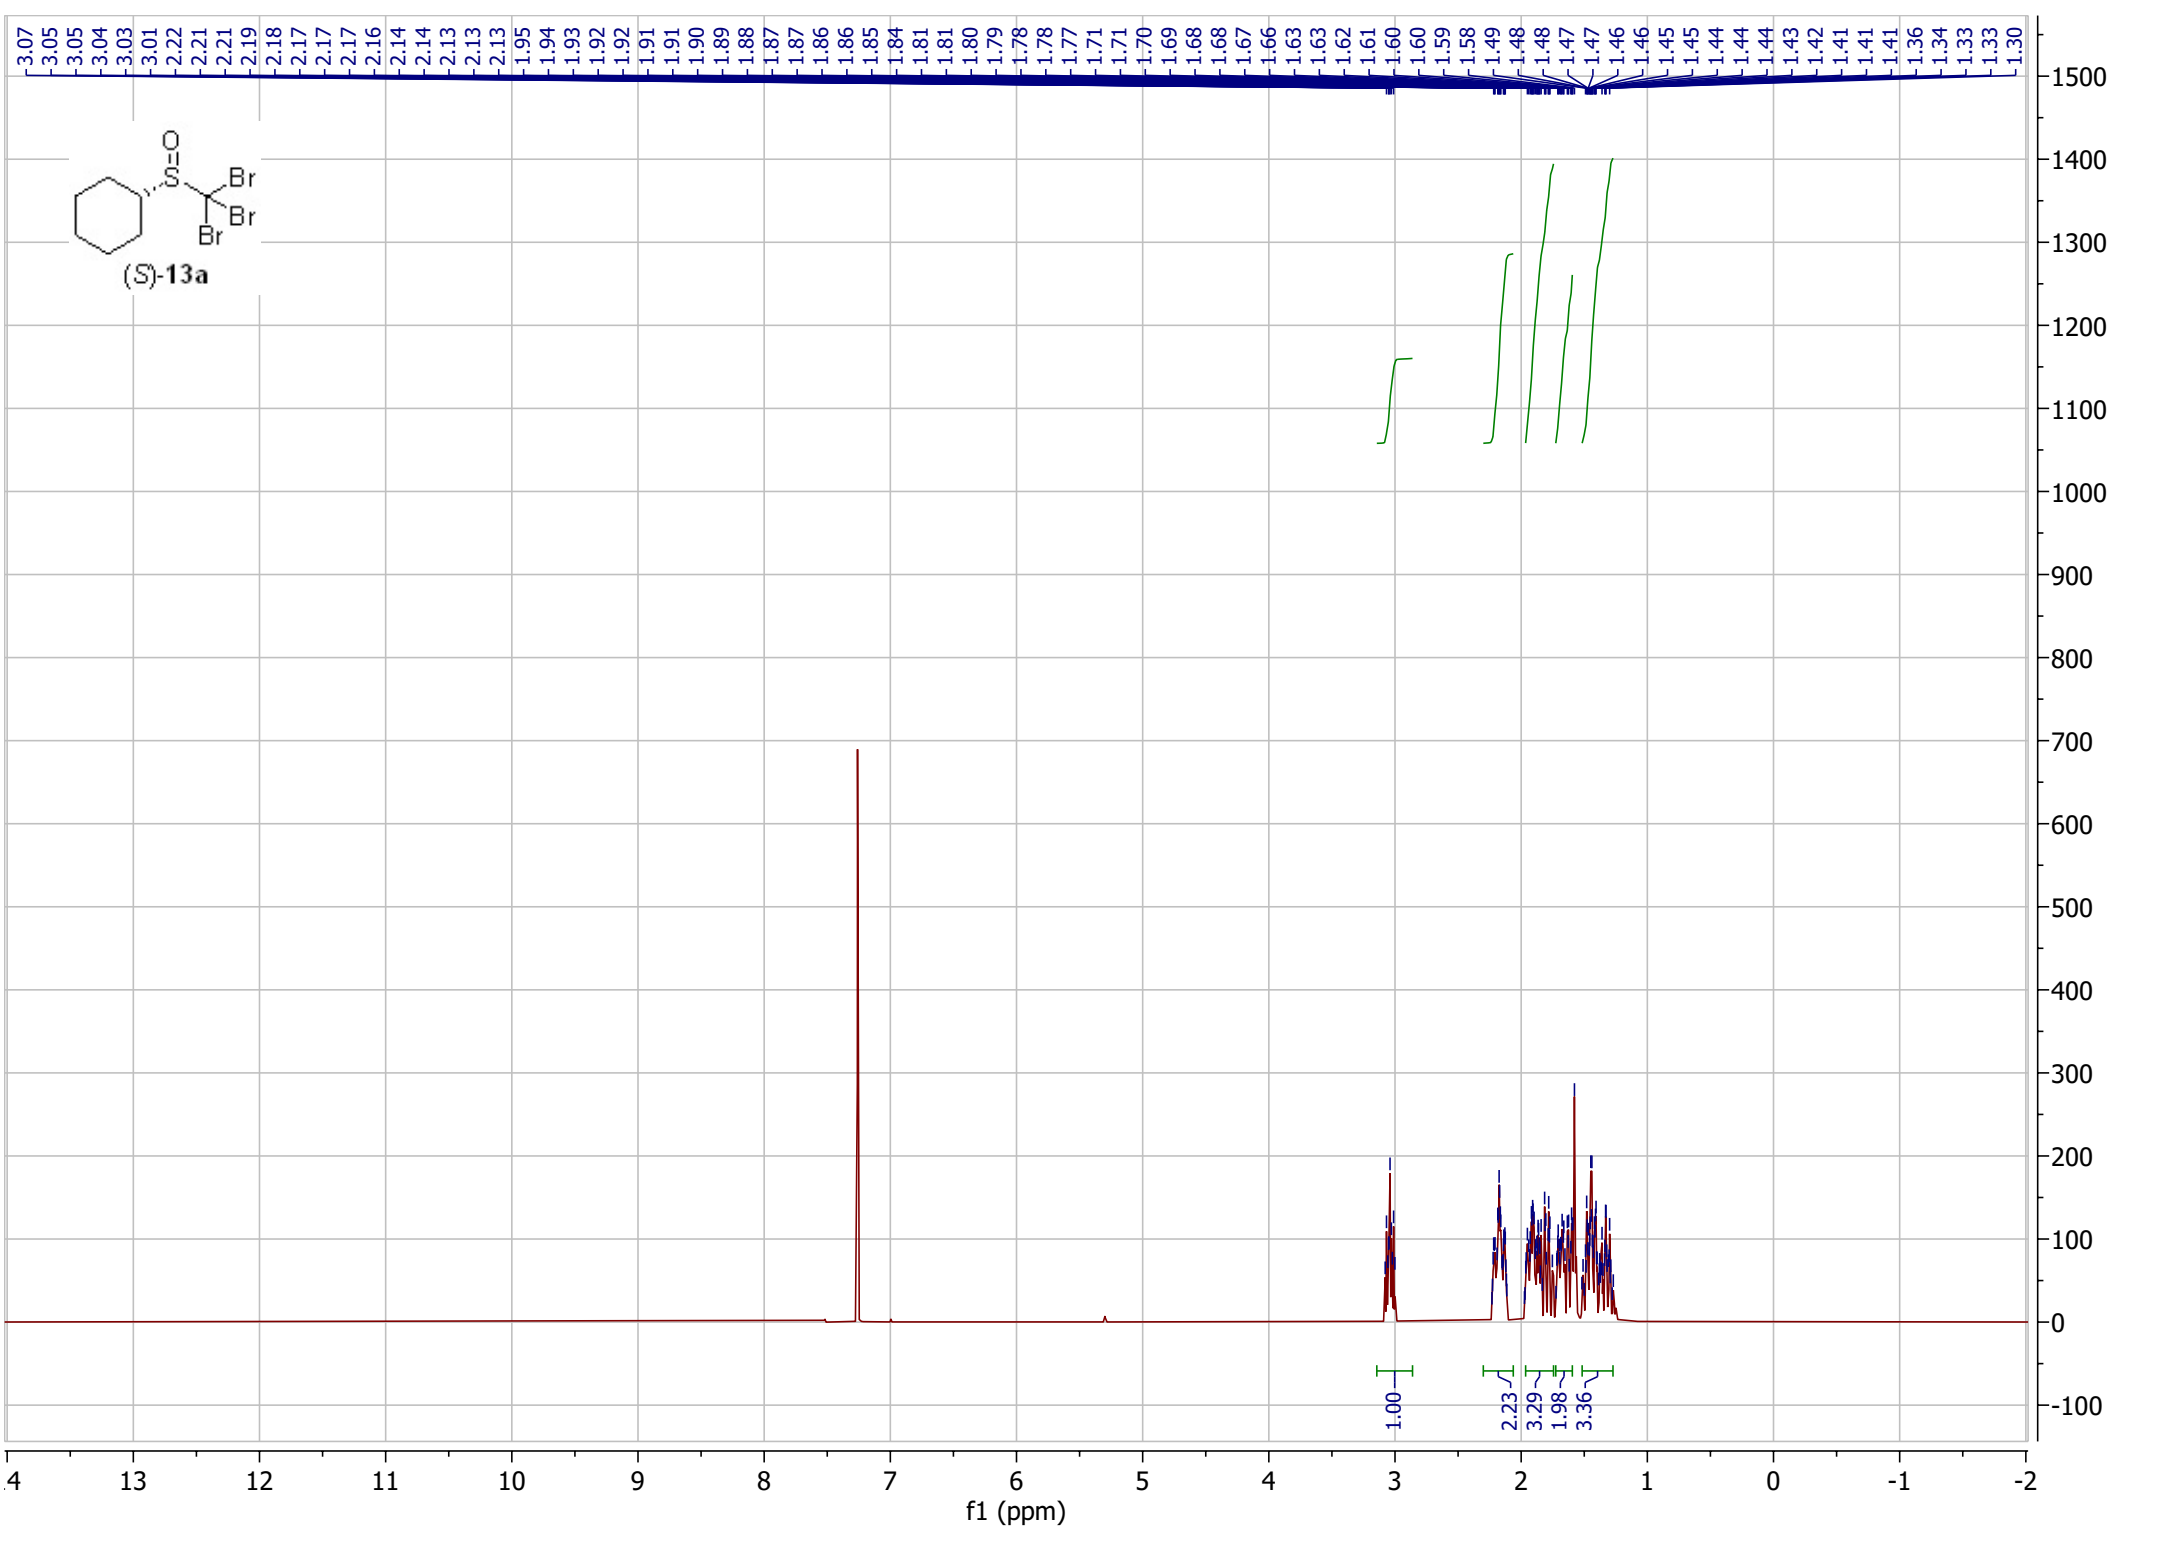

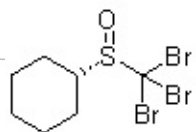

(S)-13a

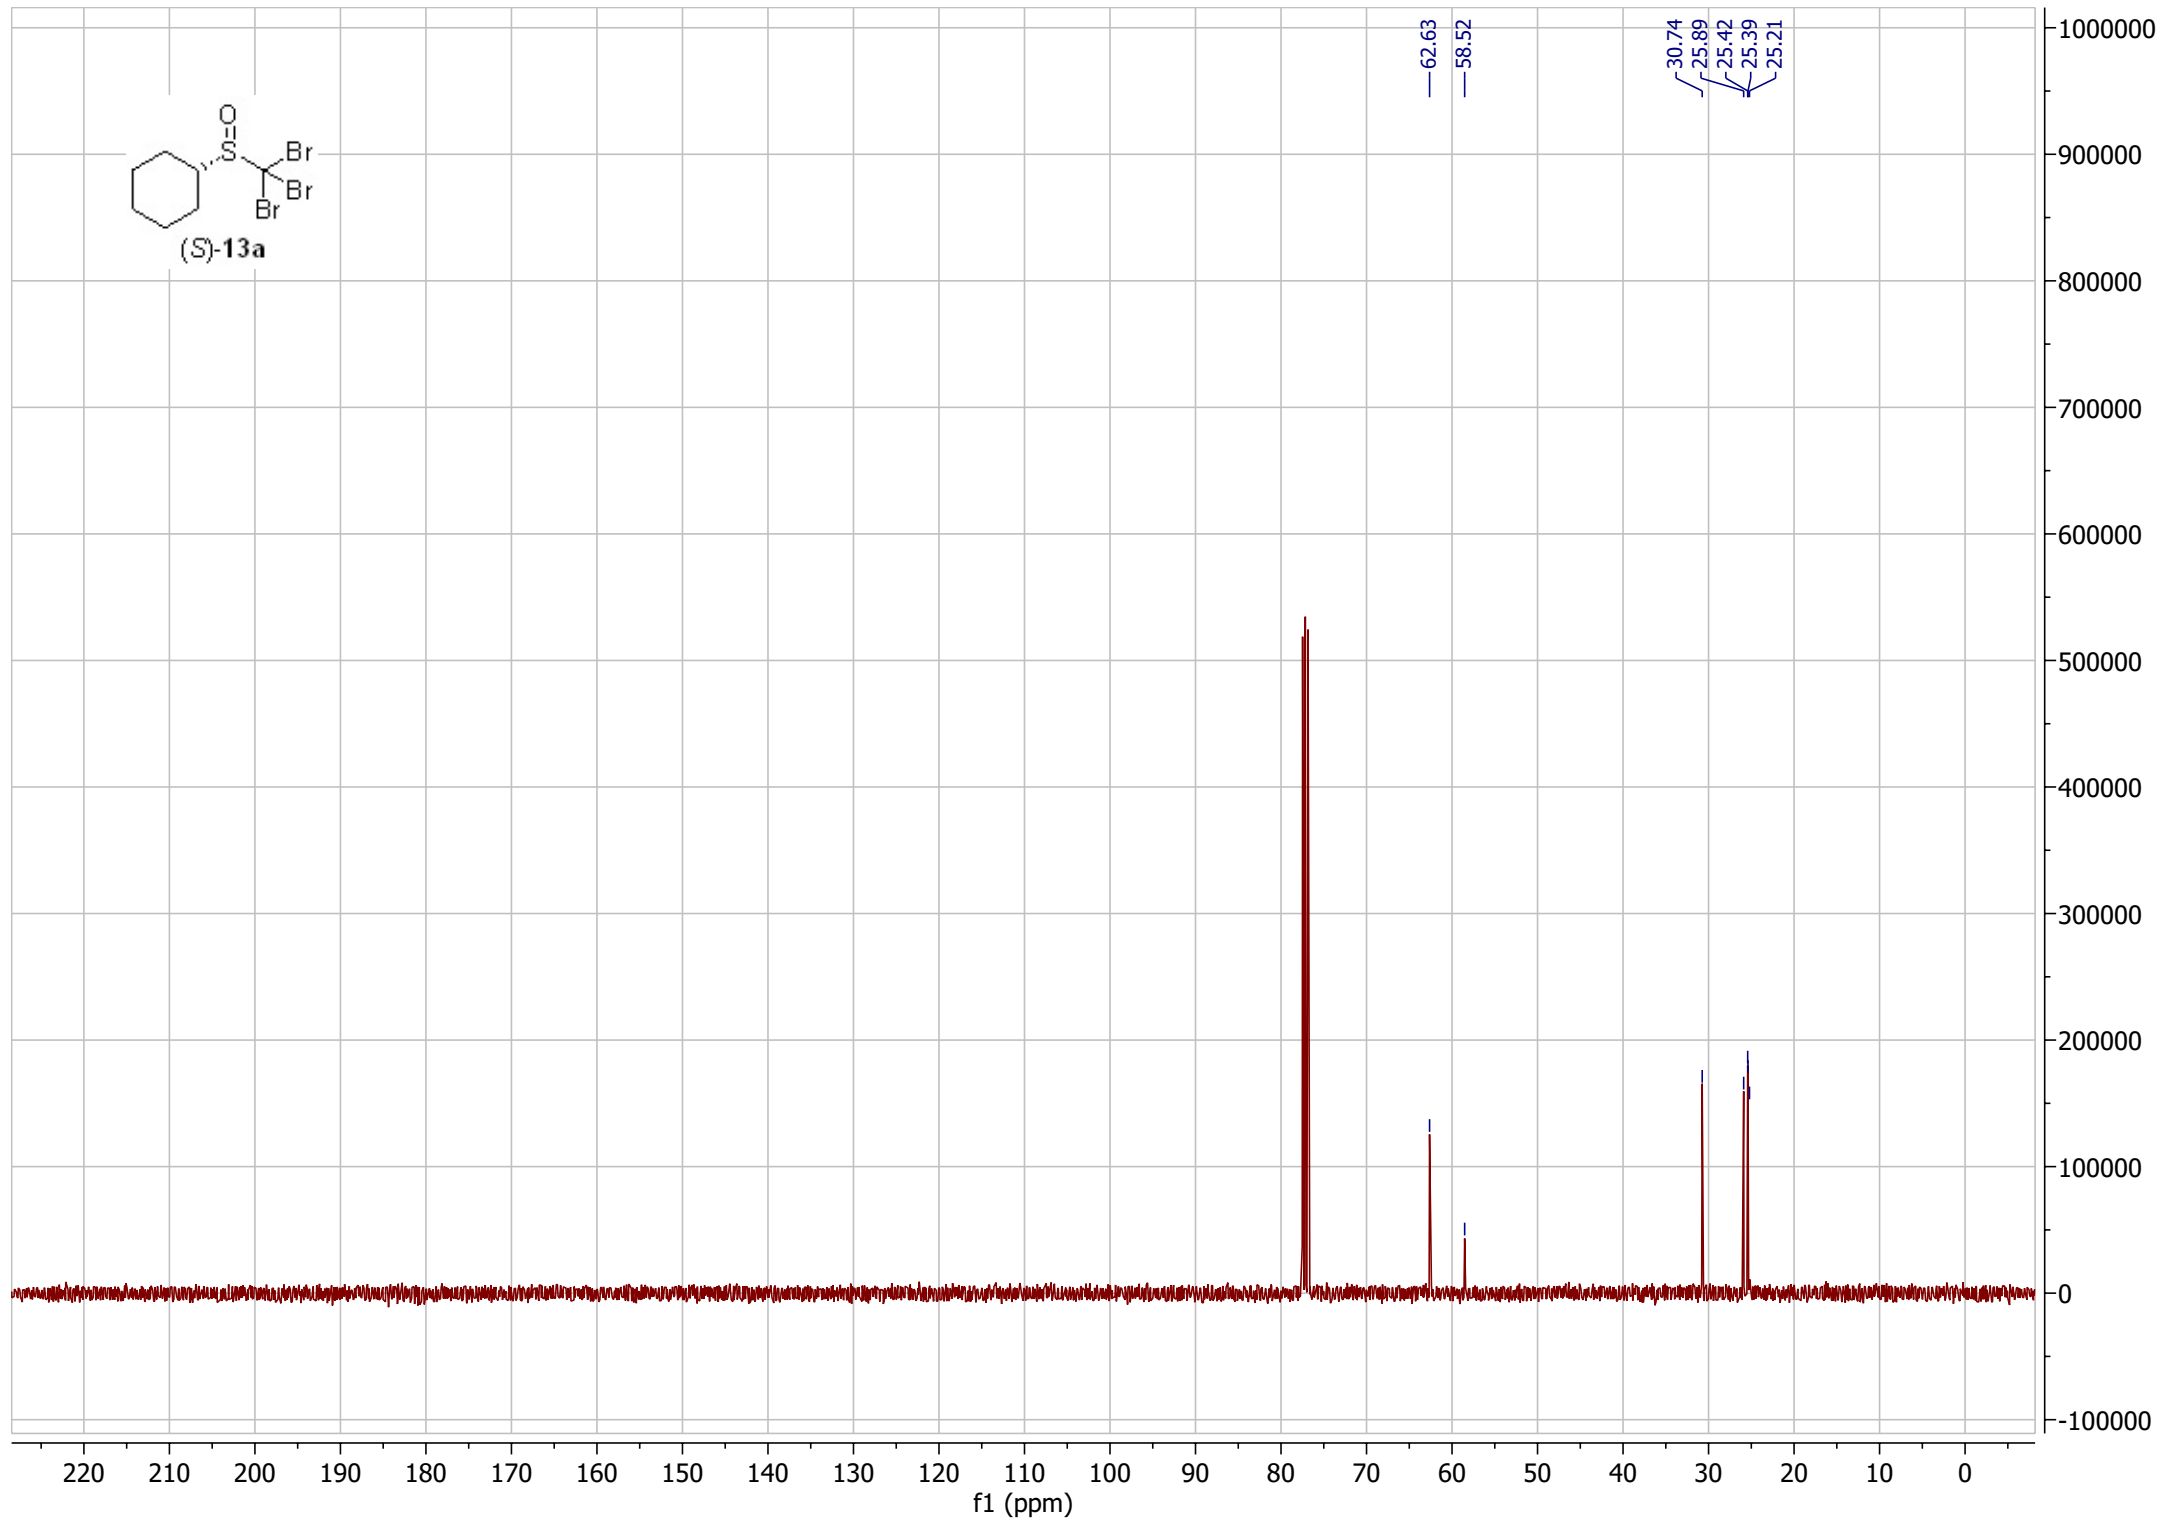

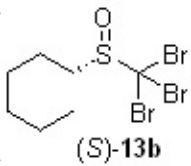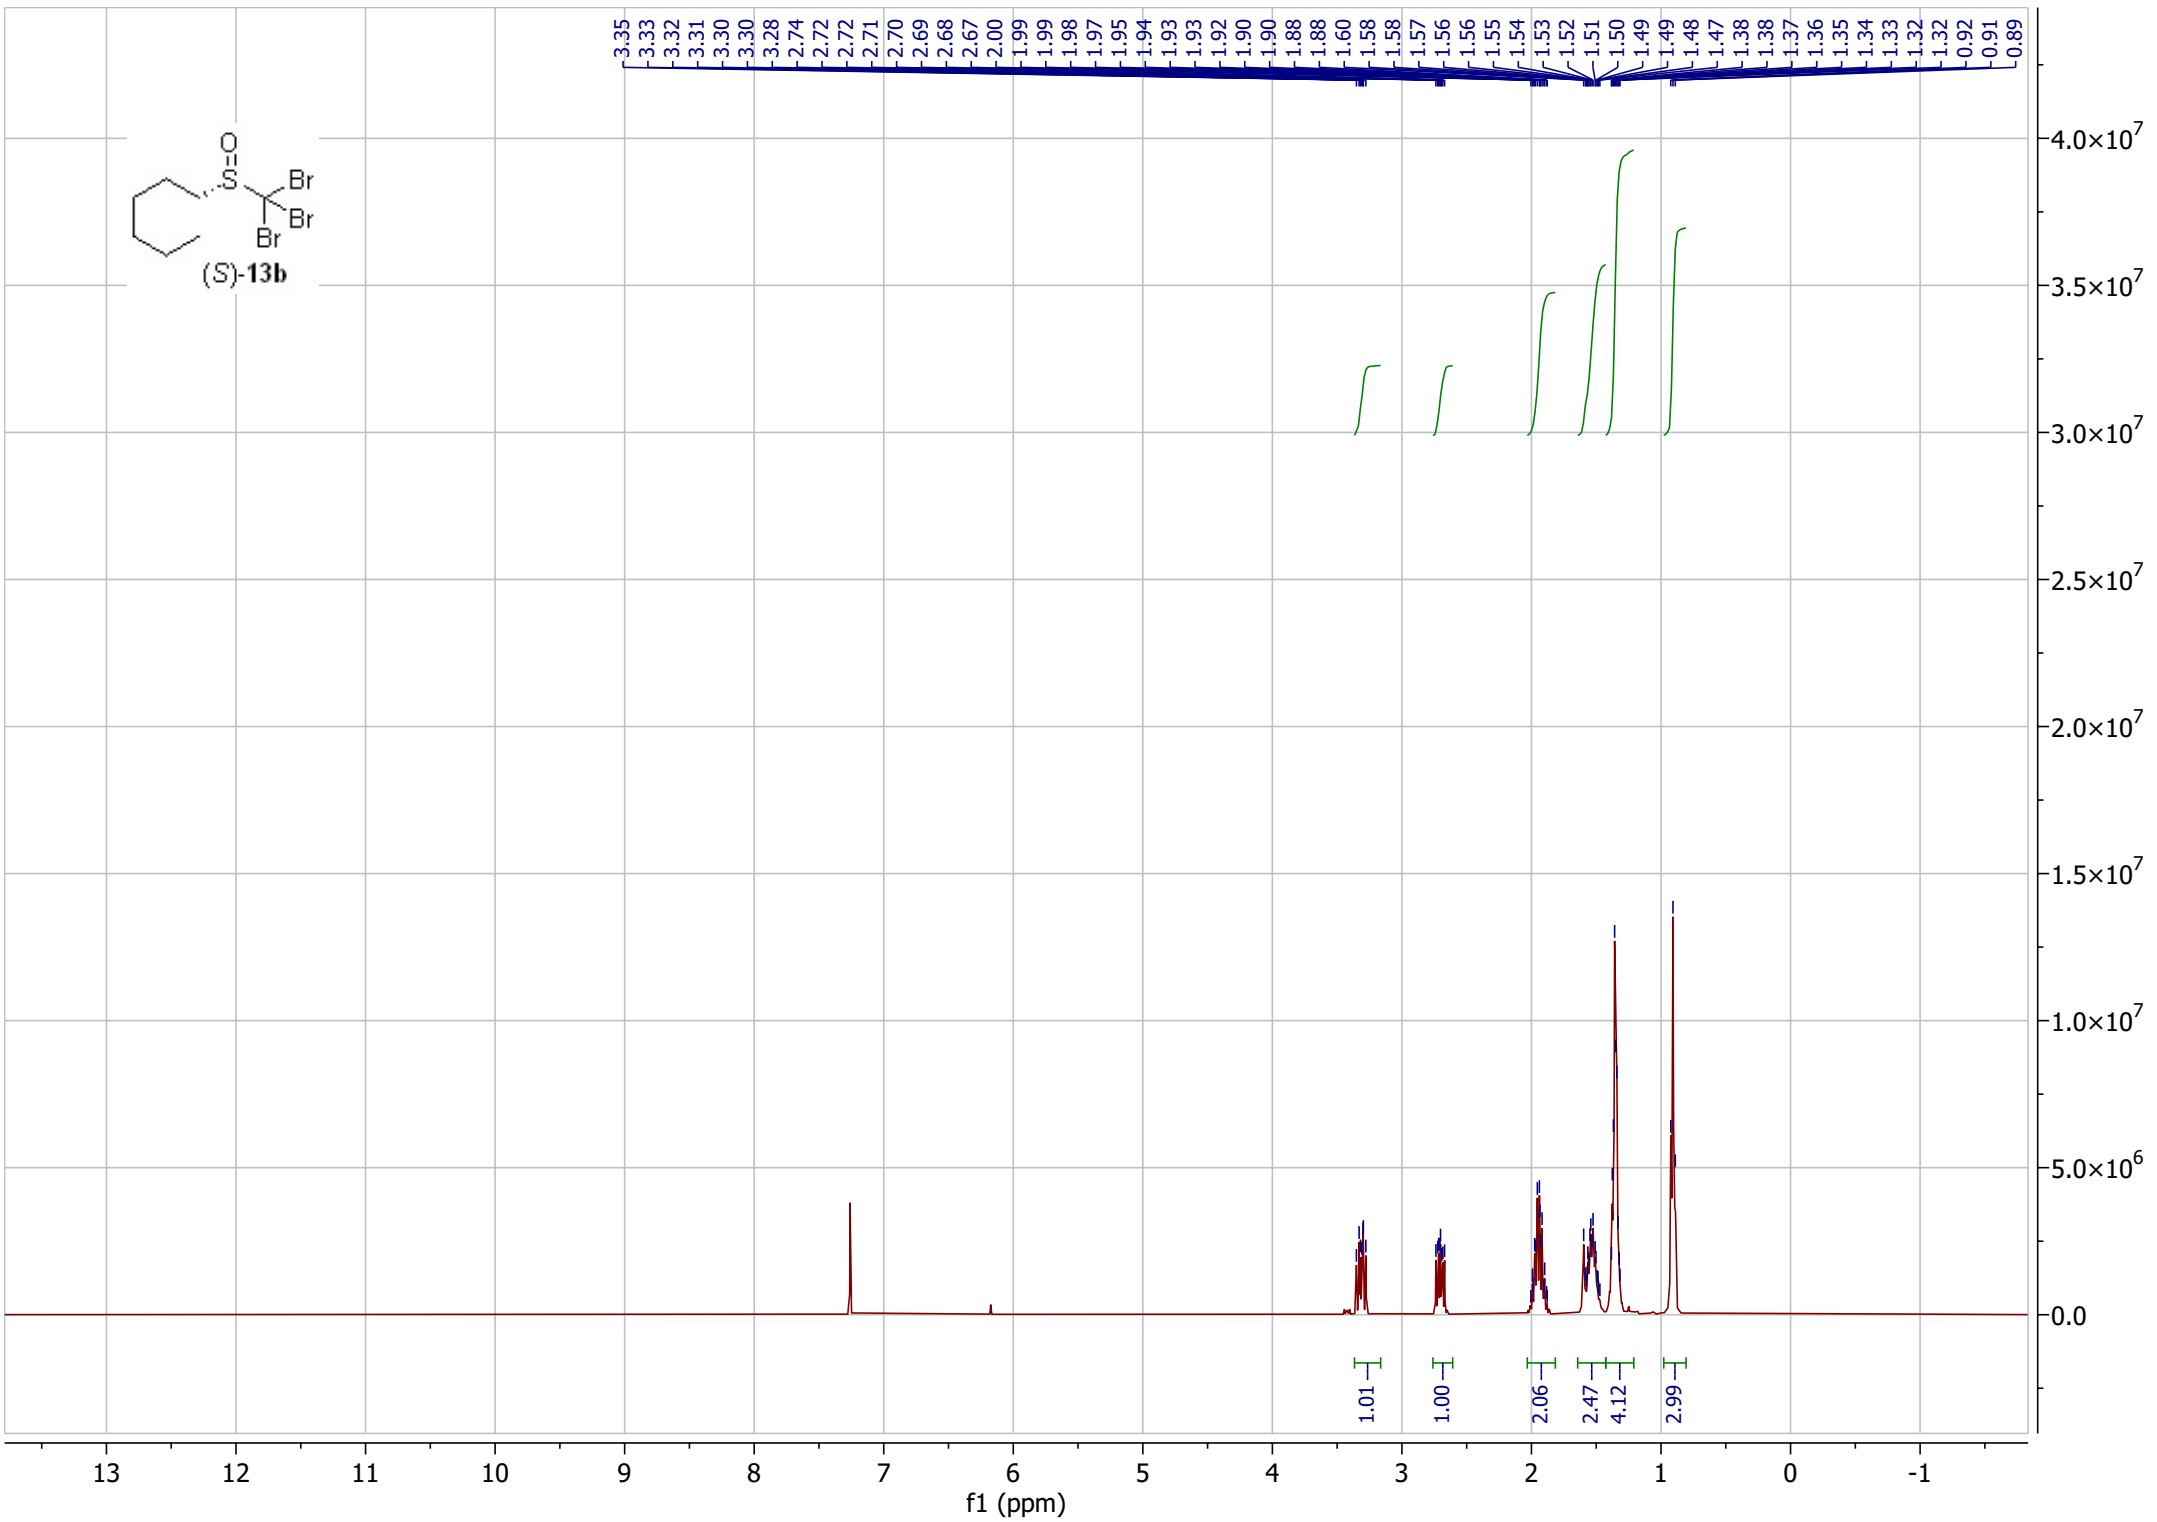

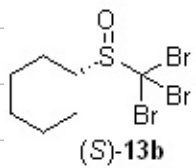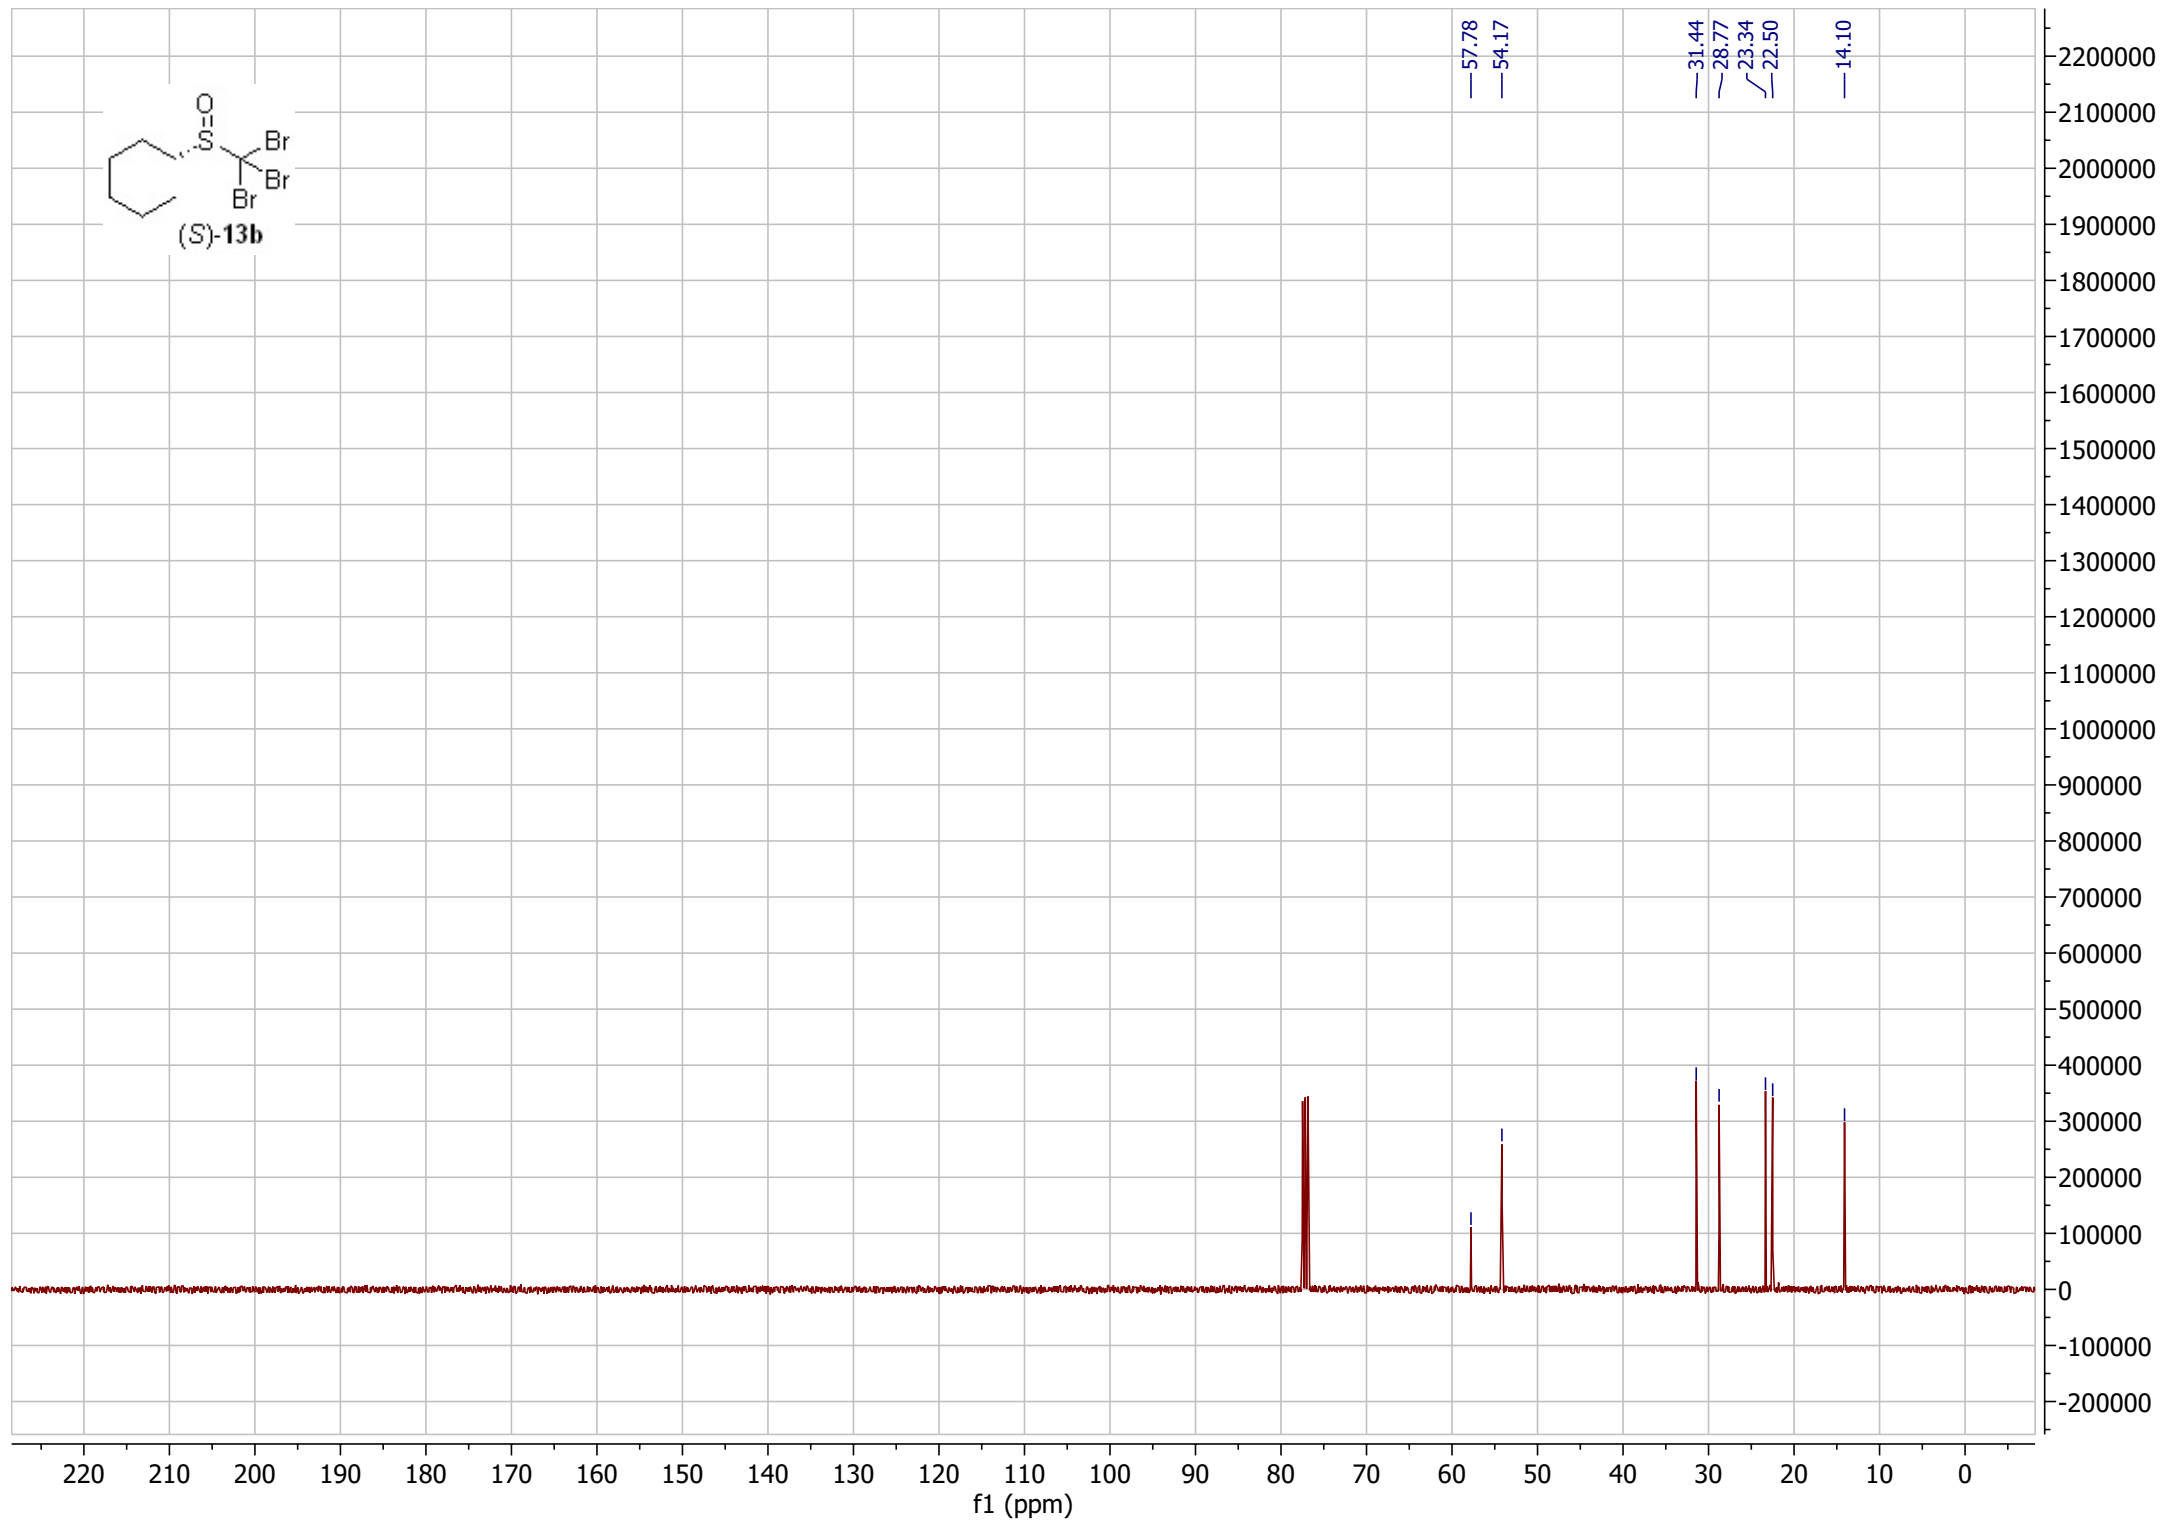

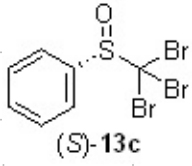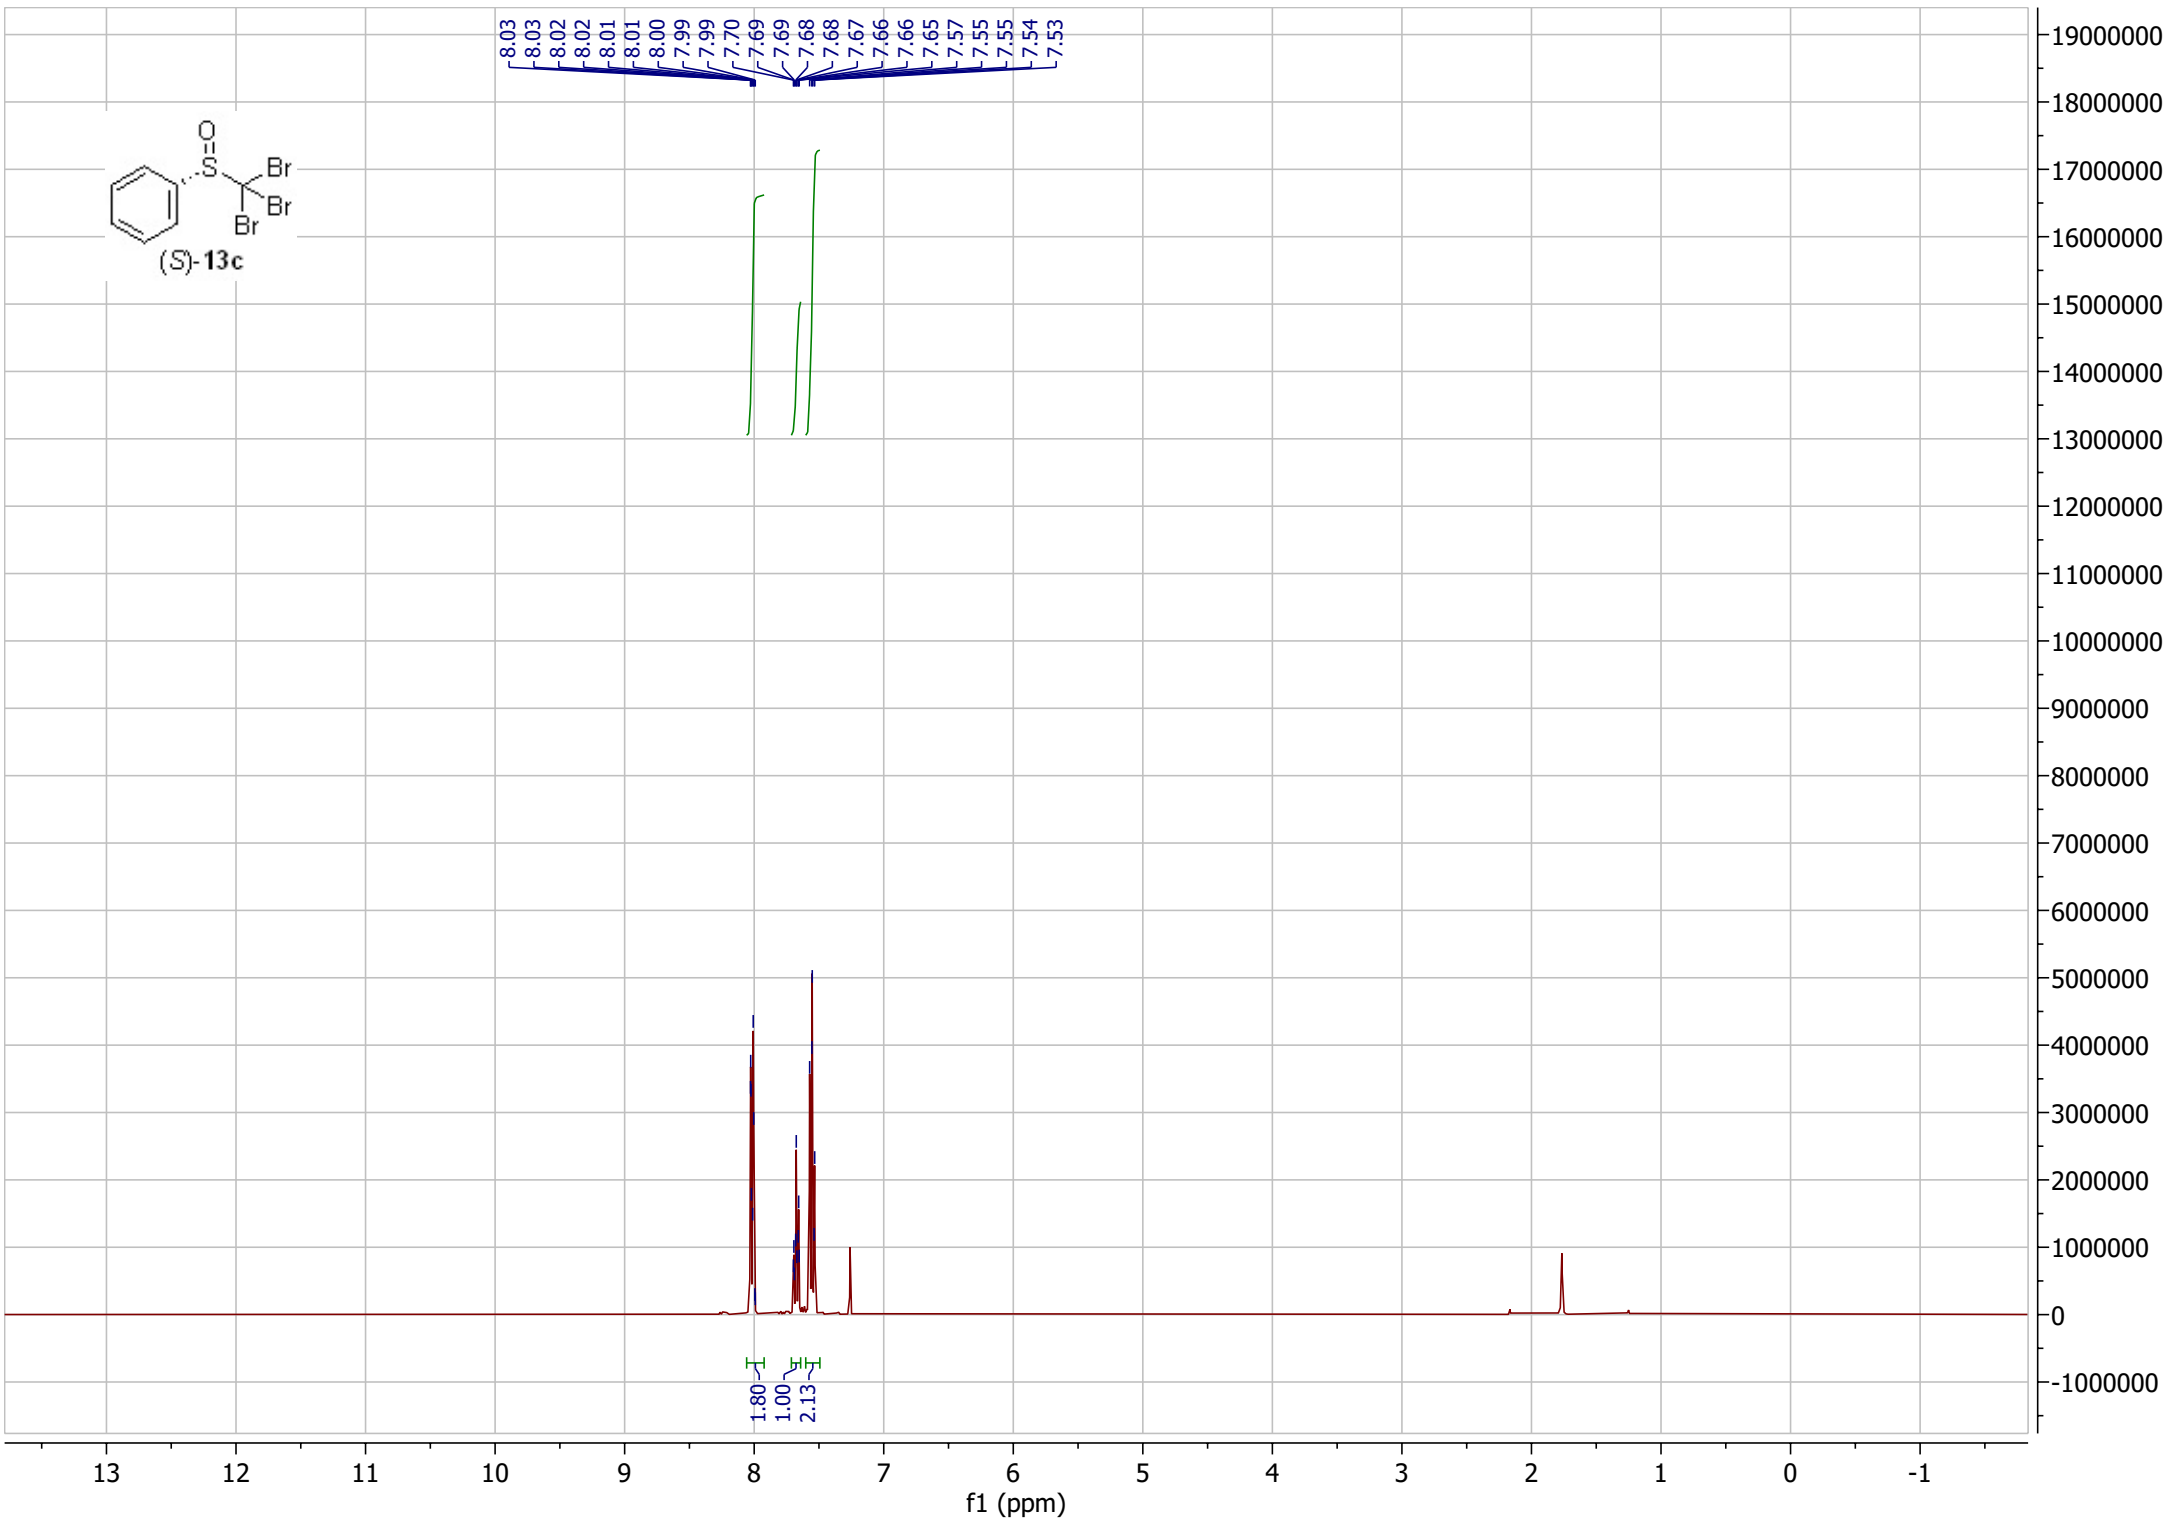

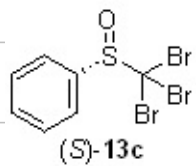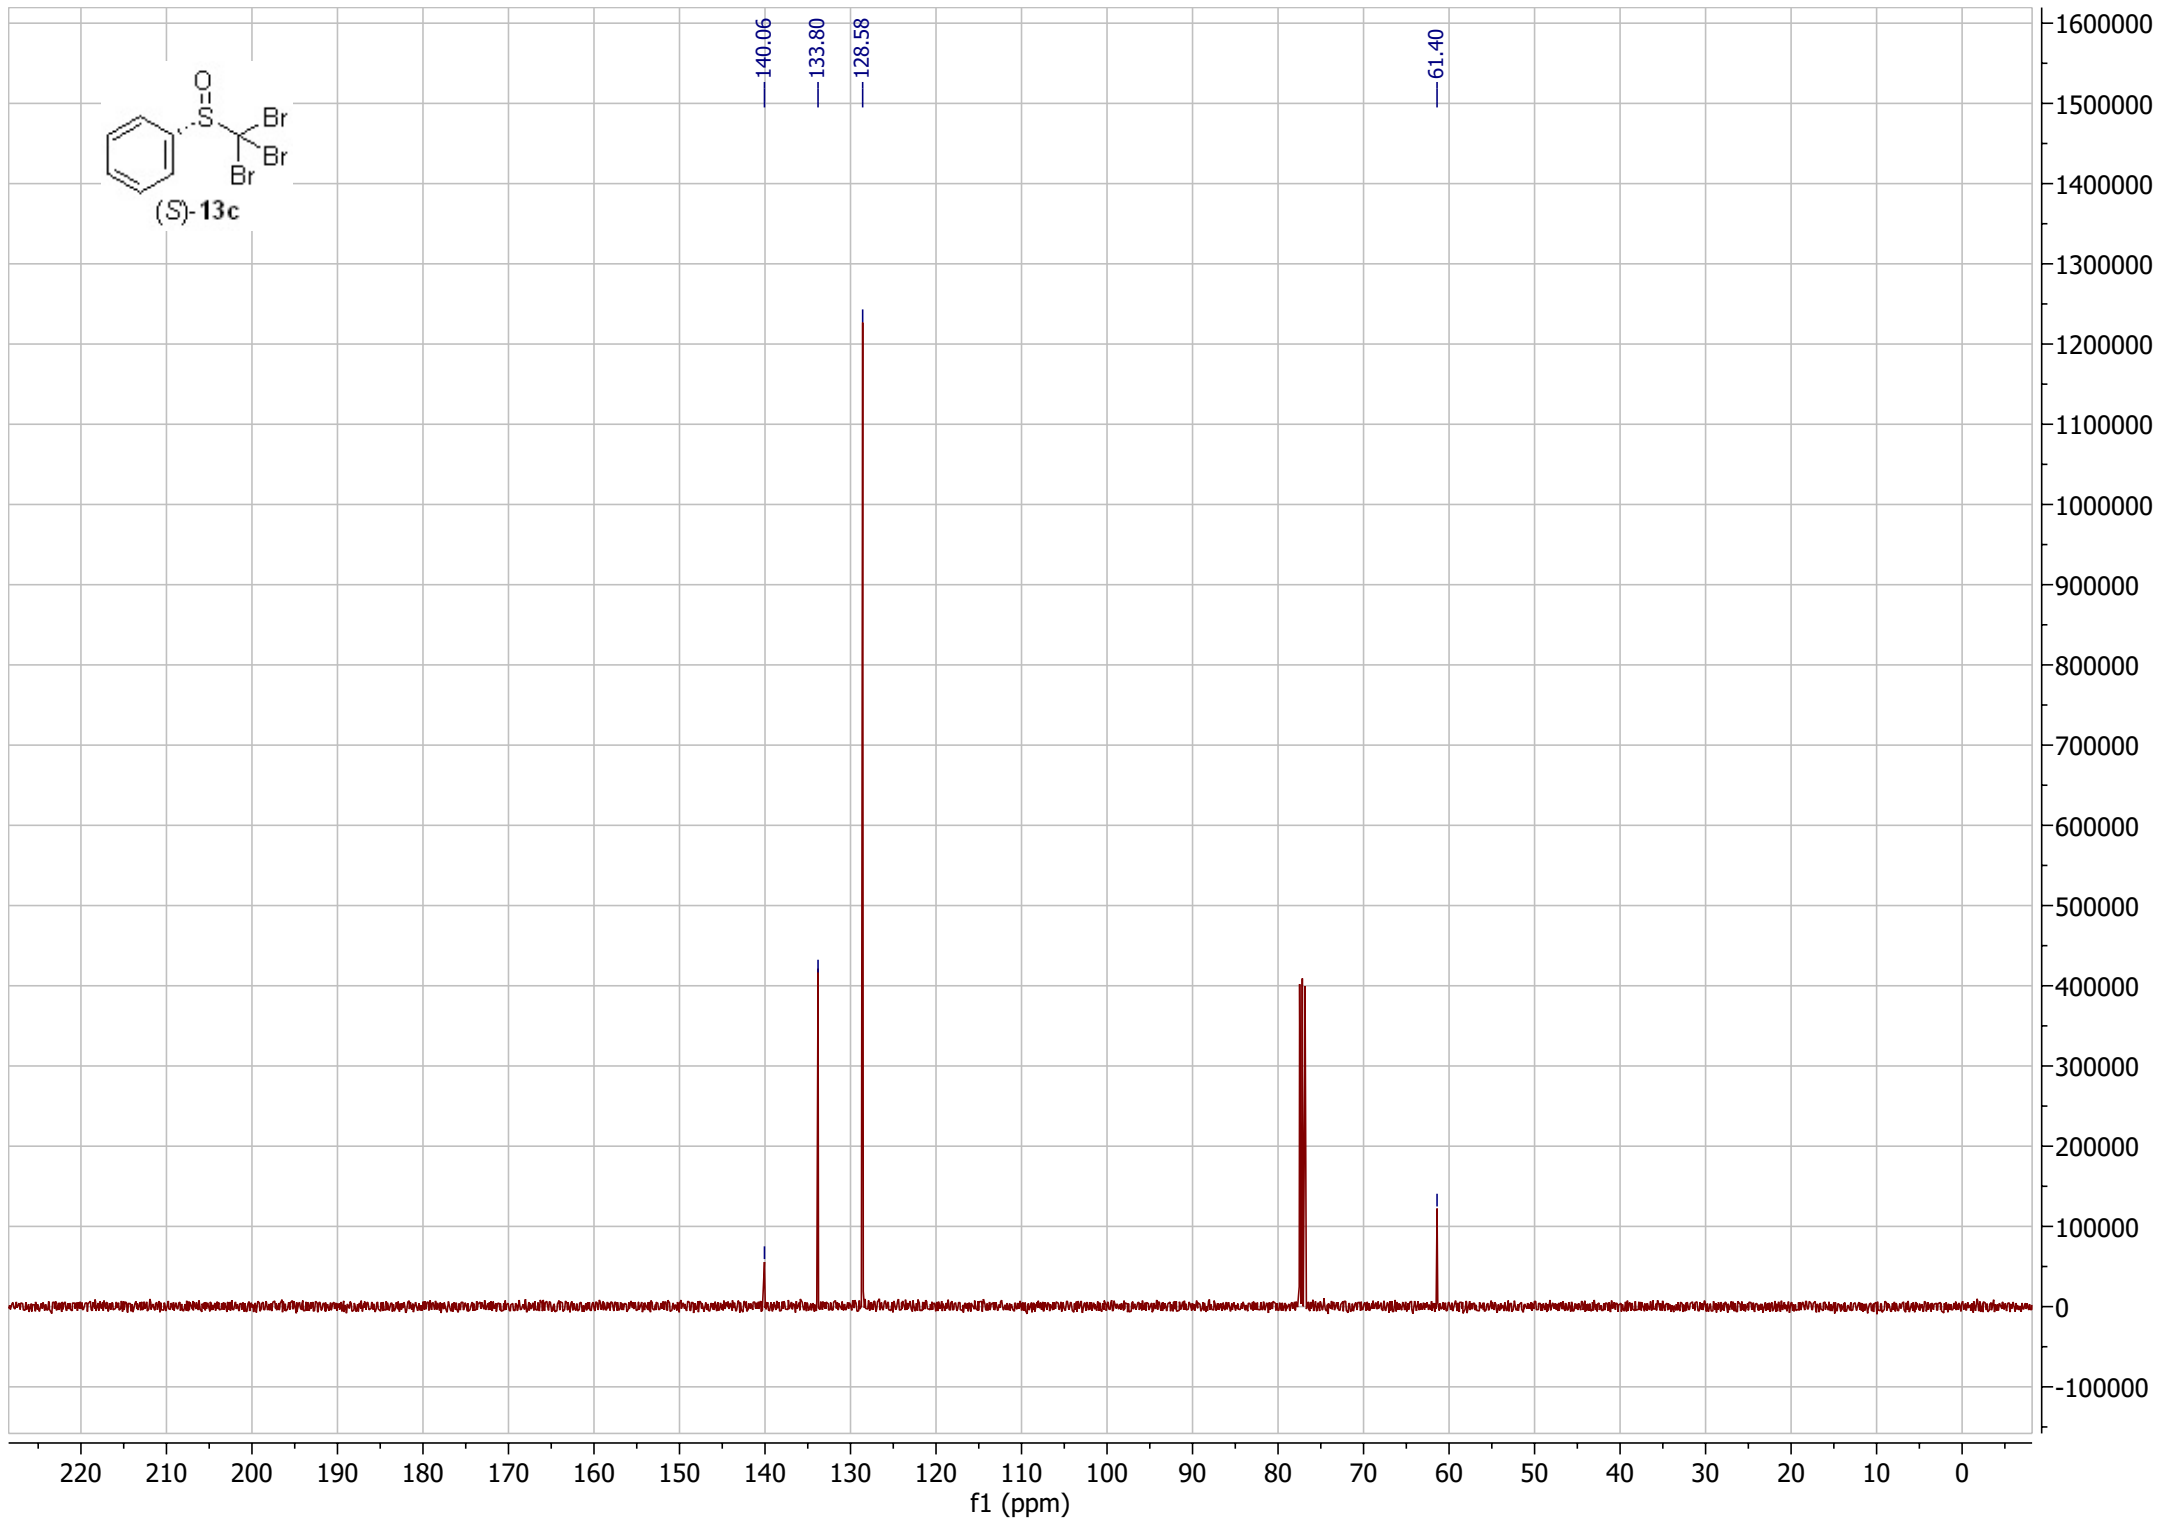



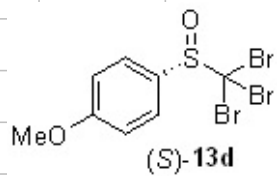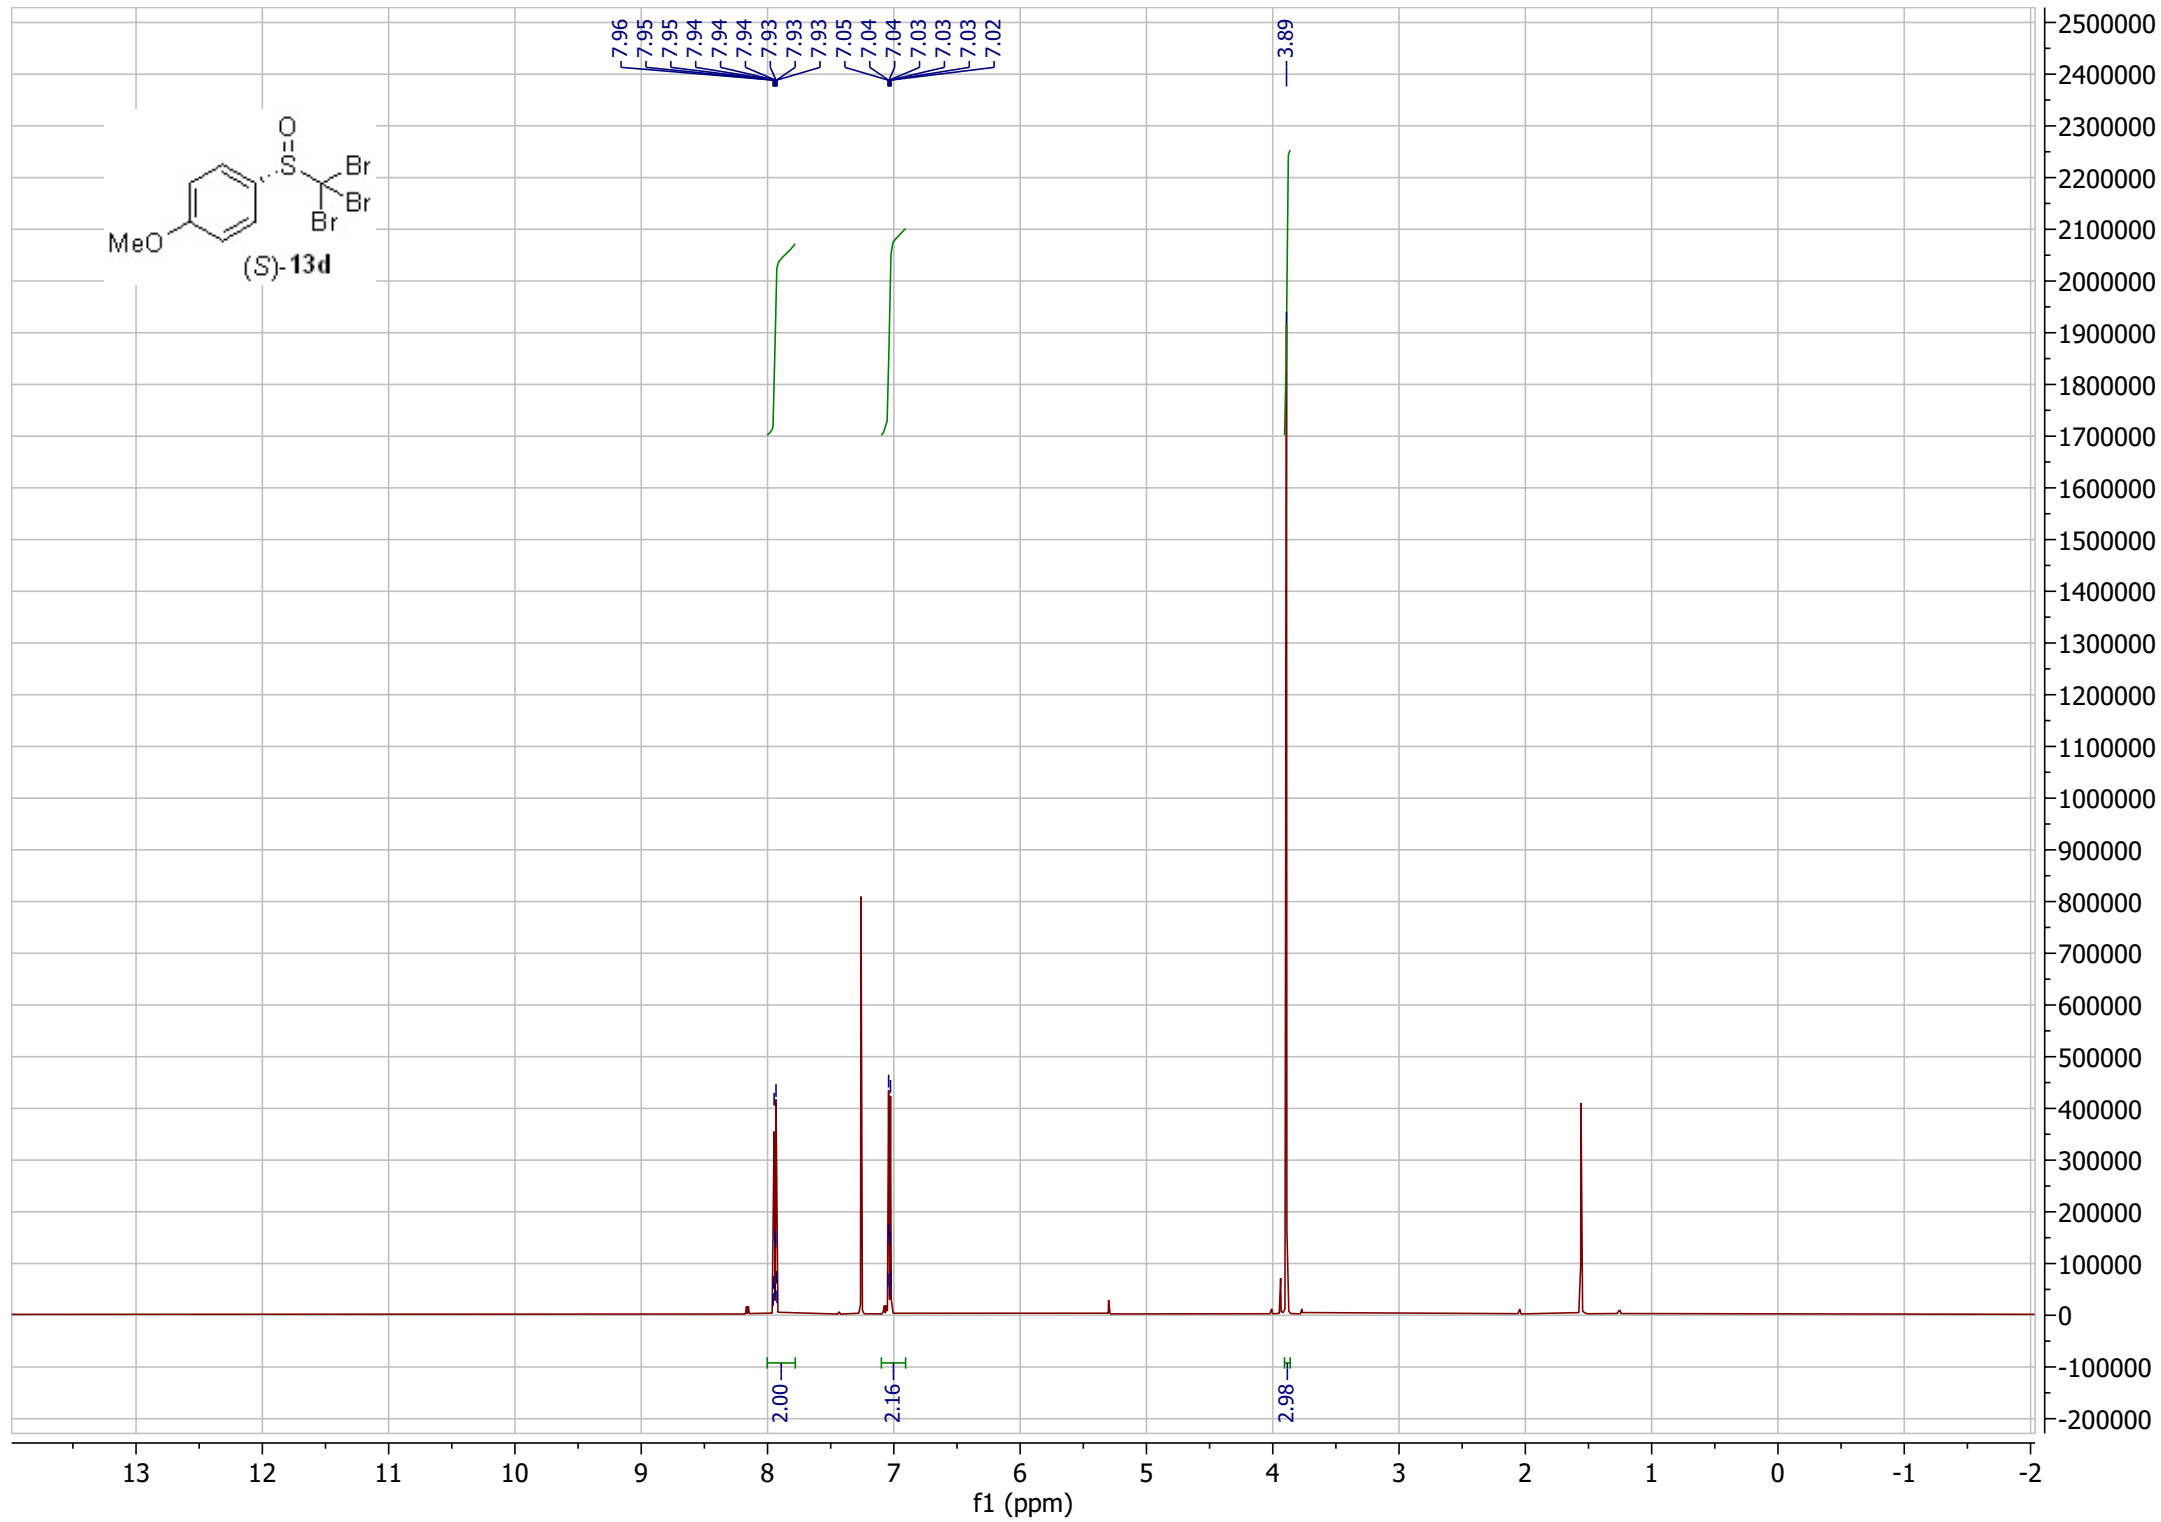

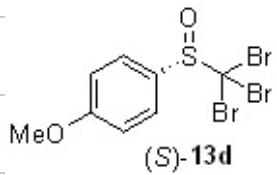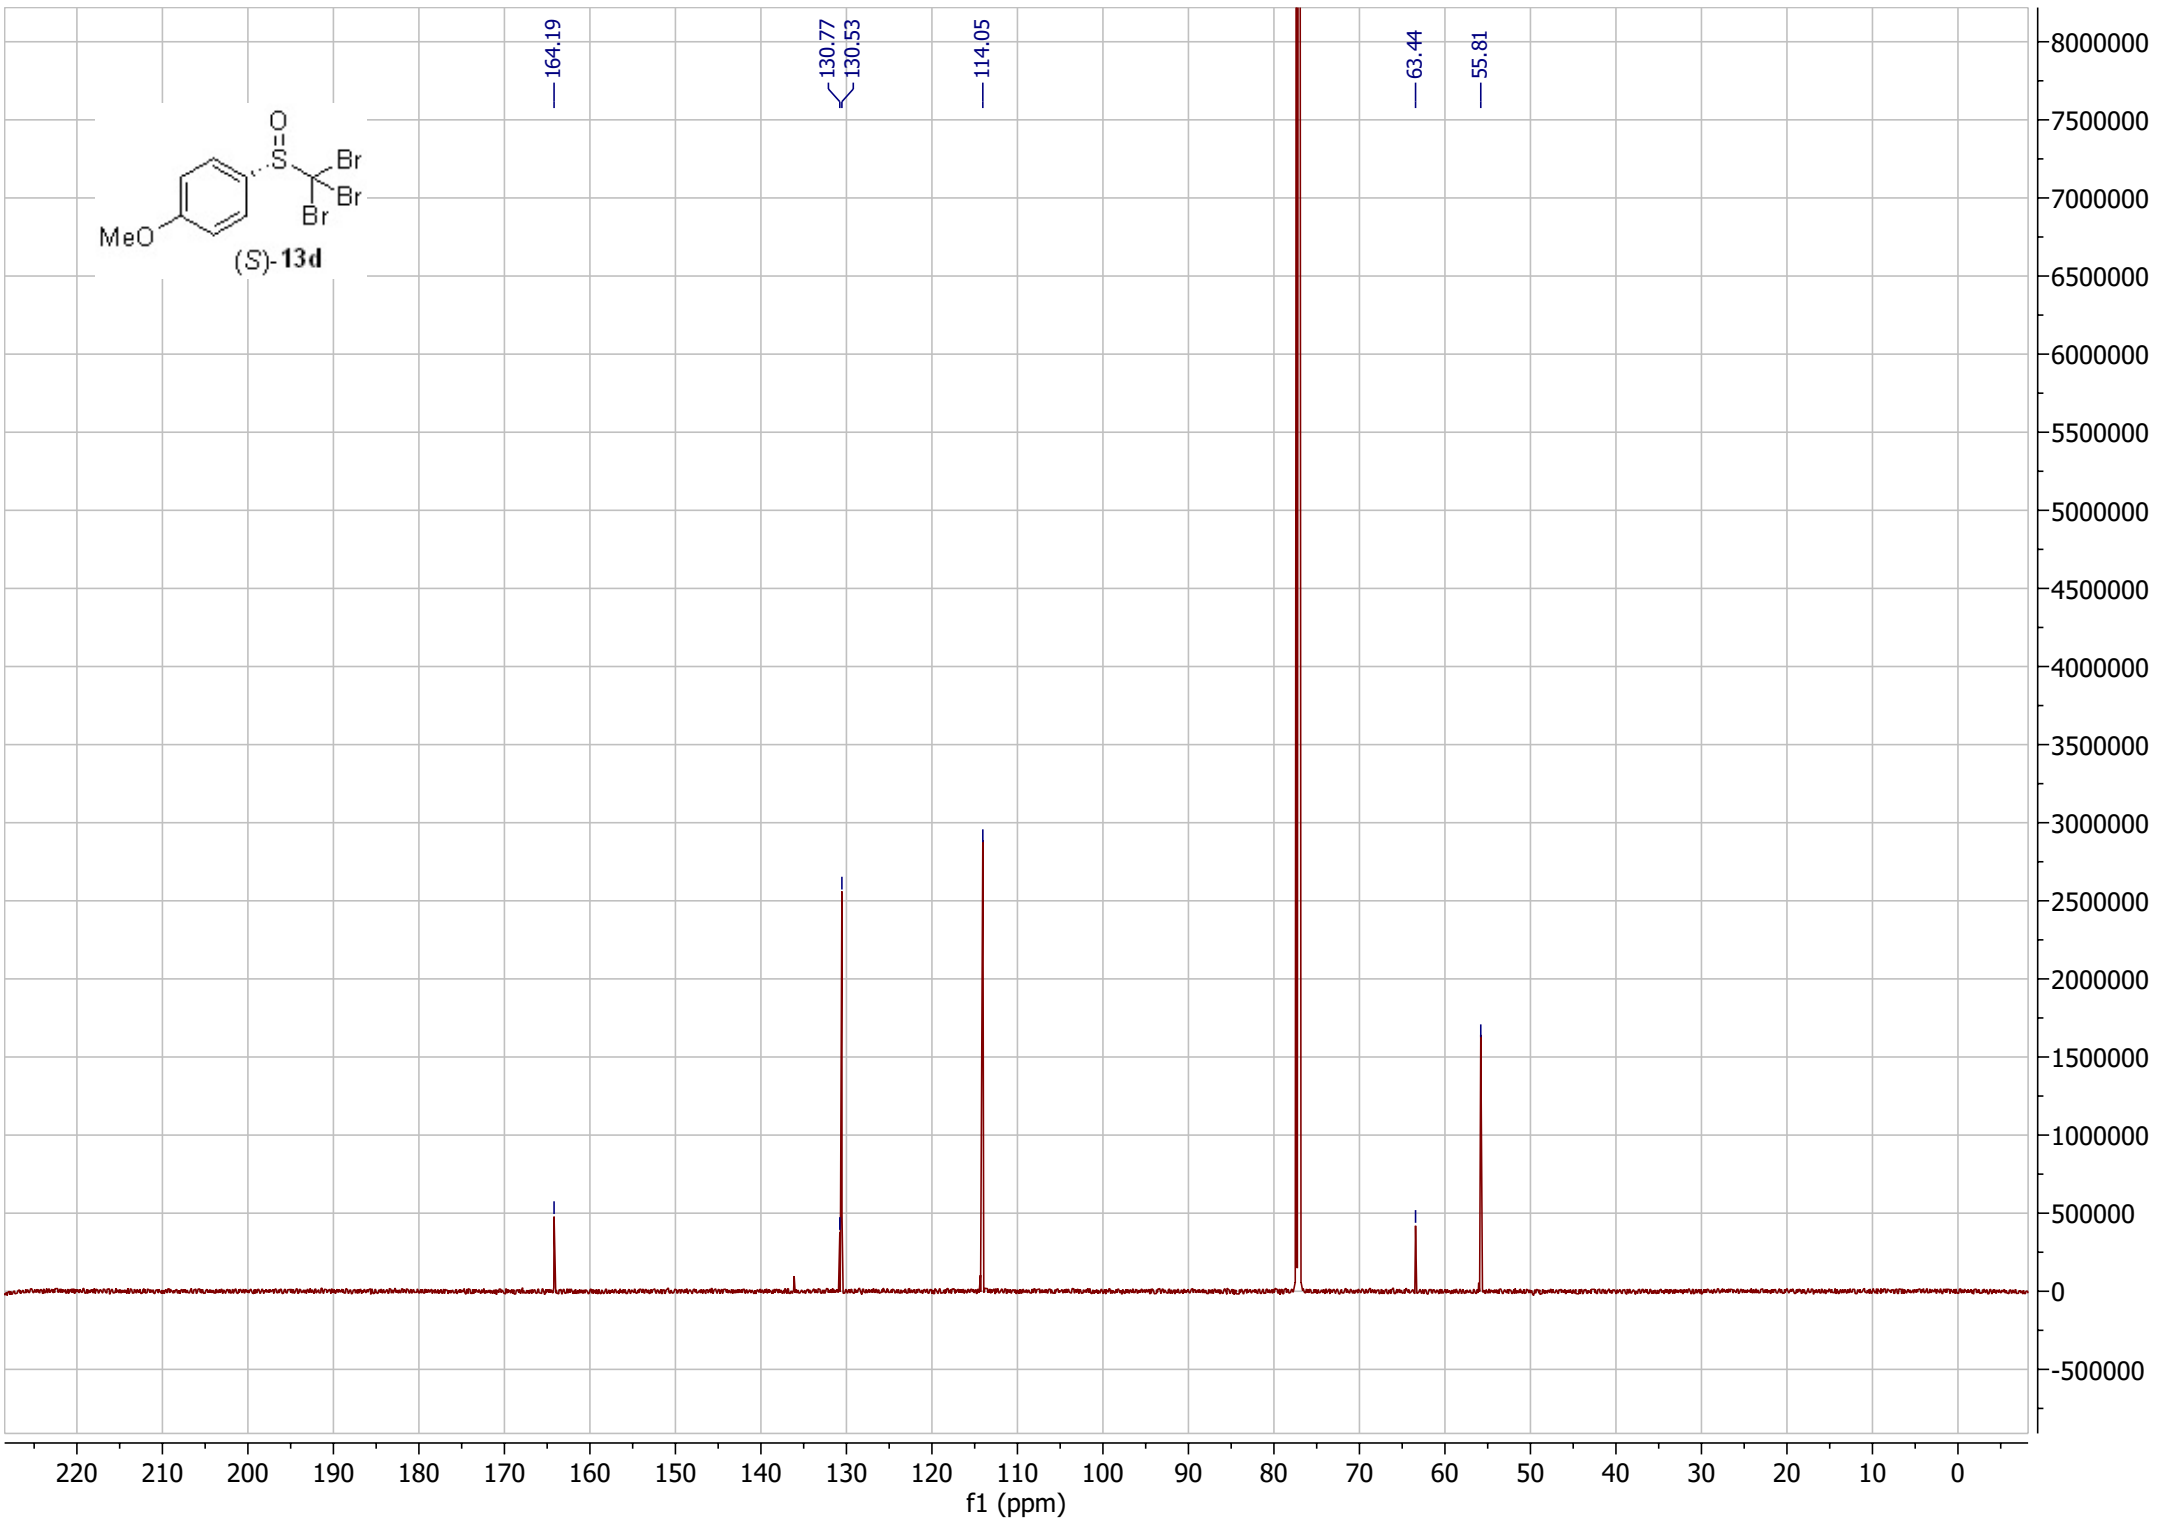

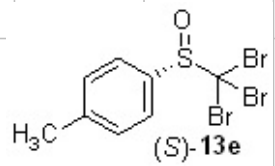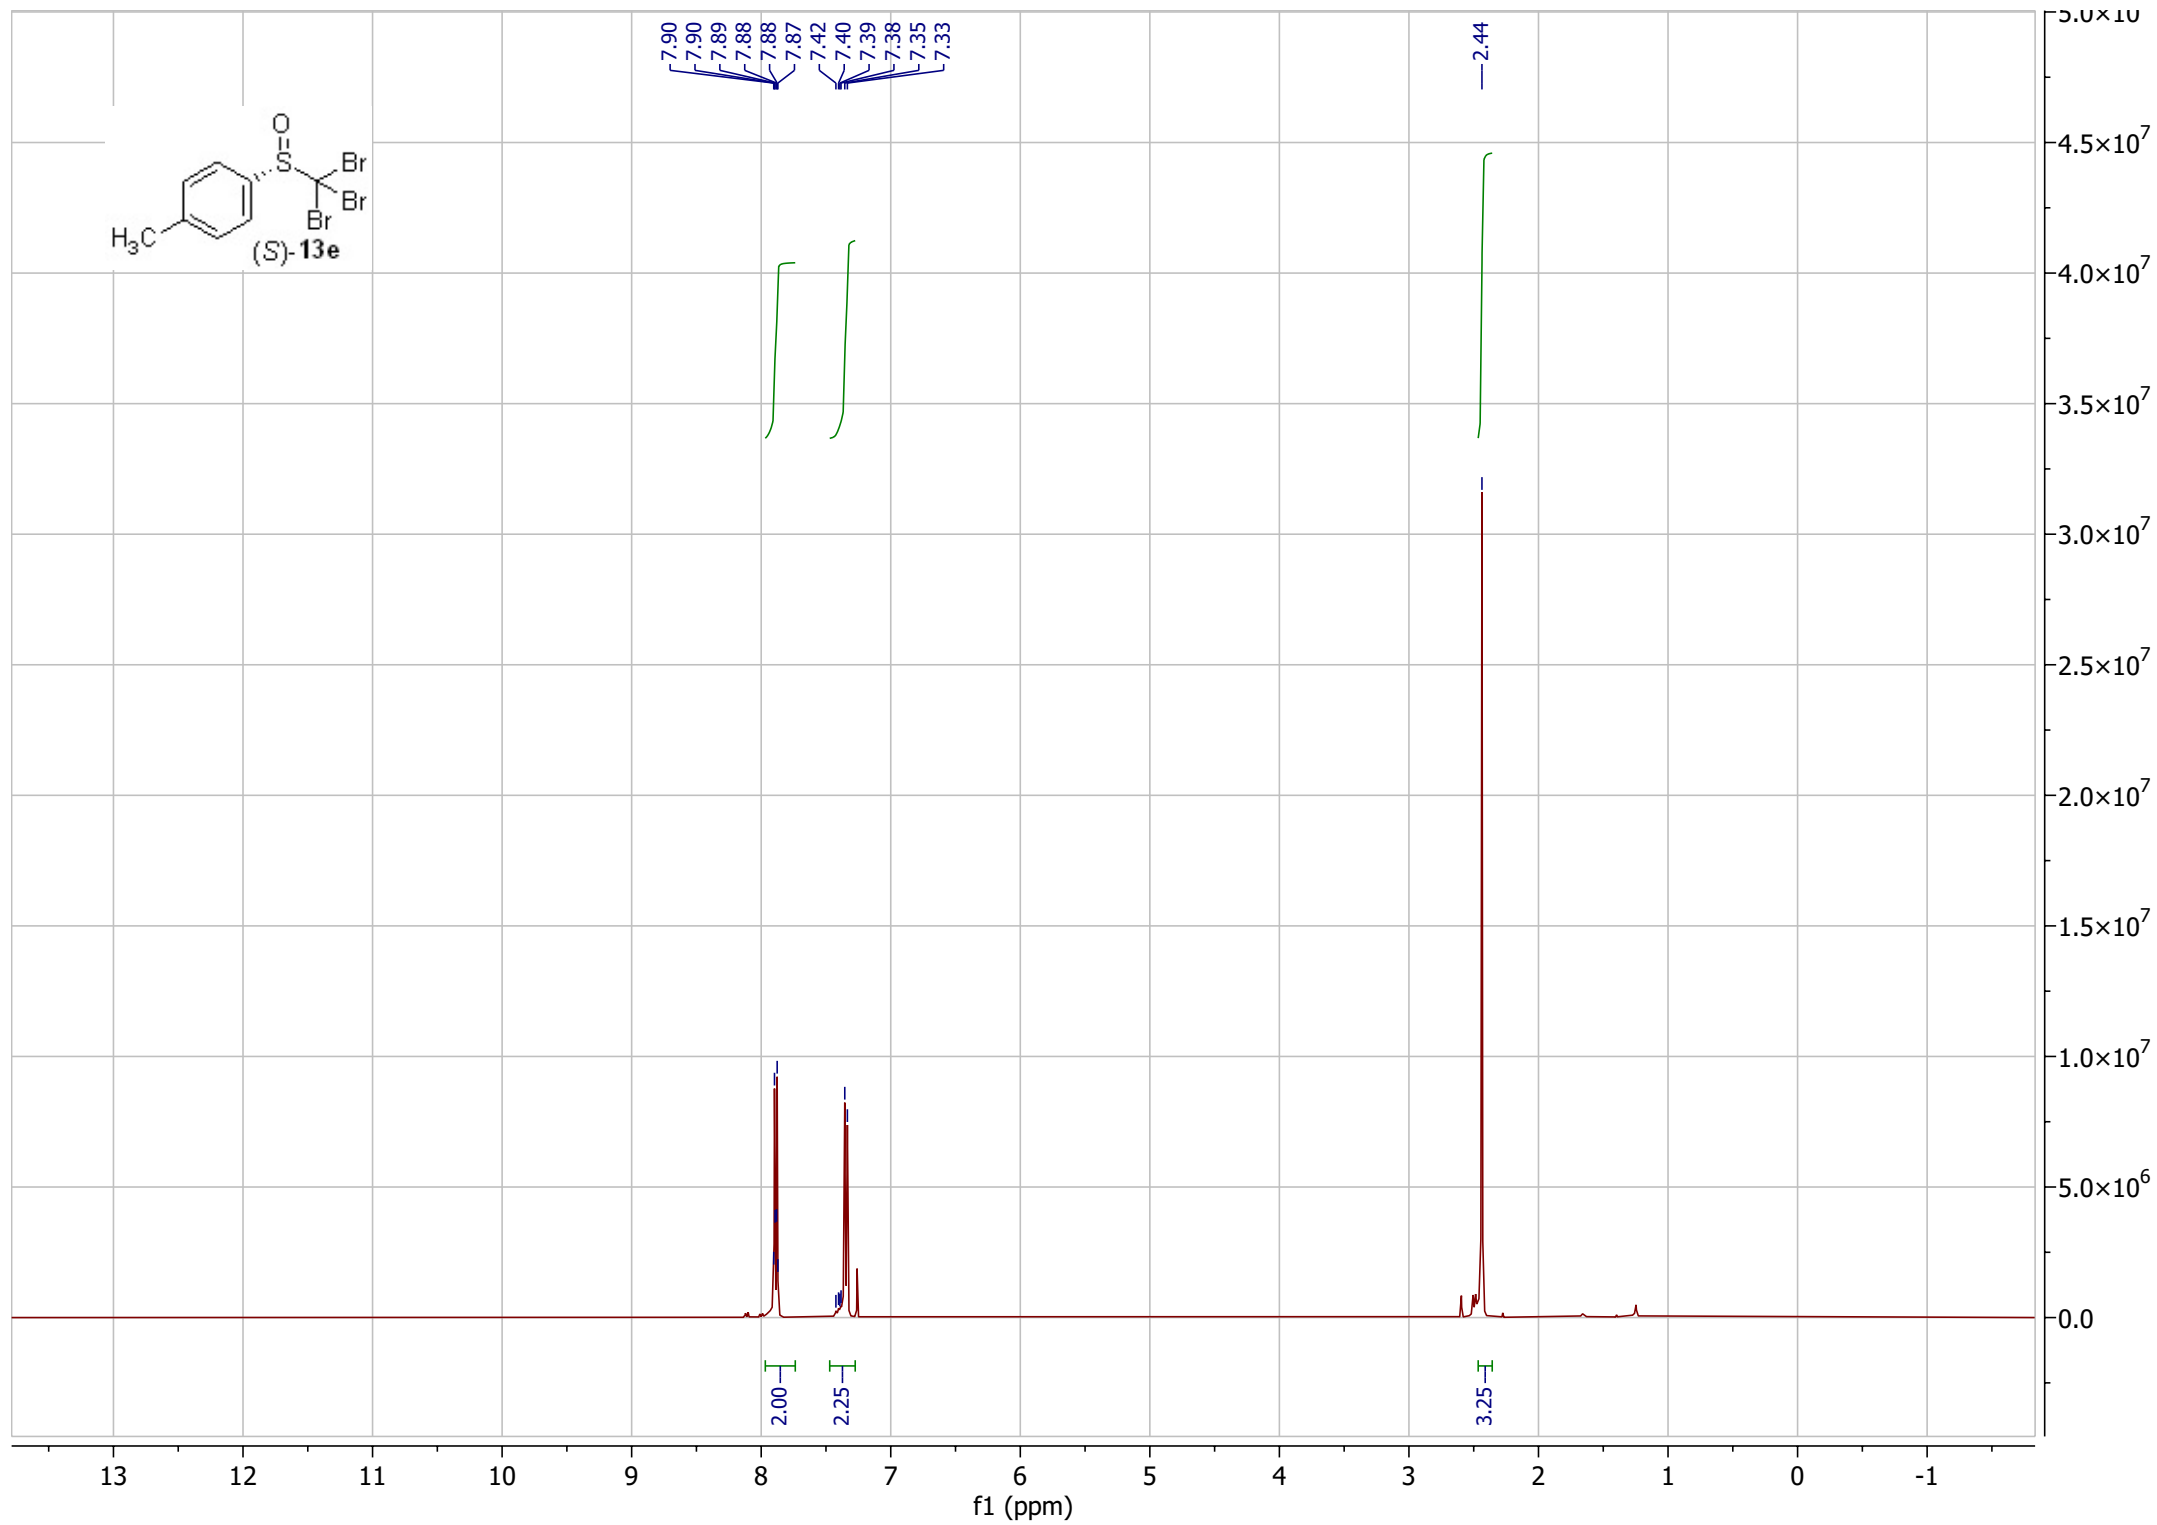

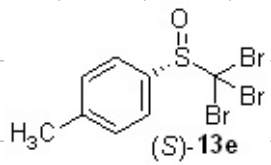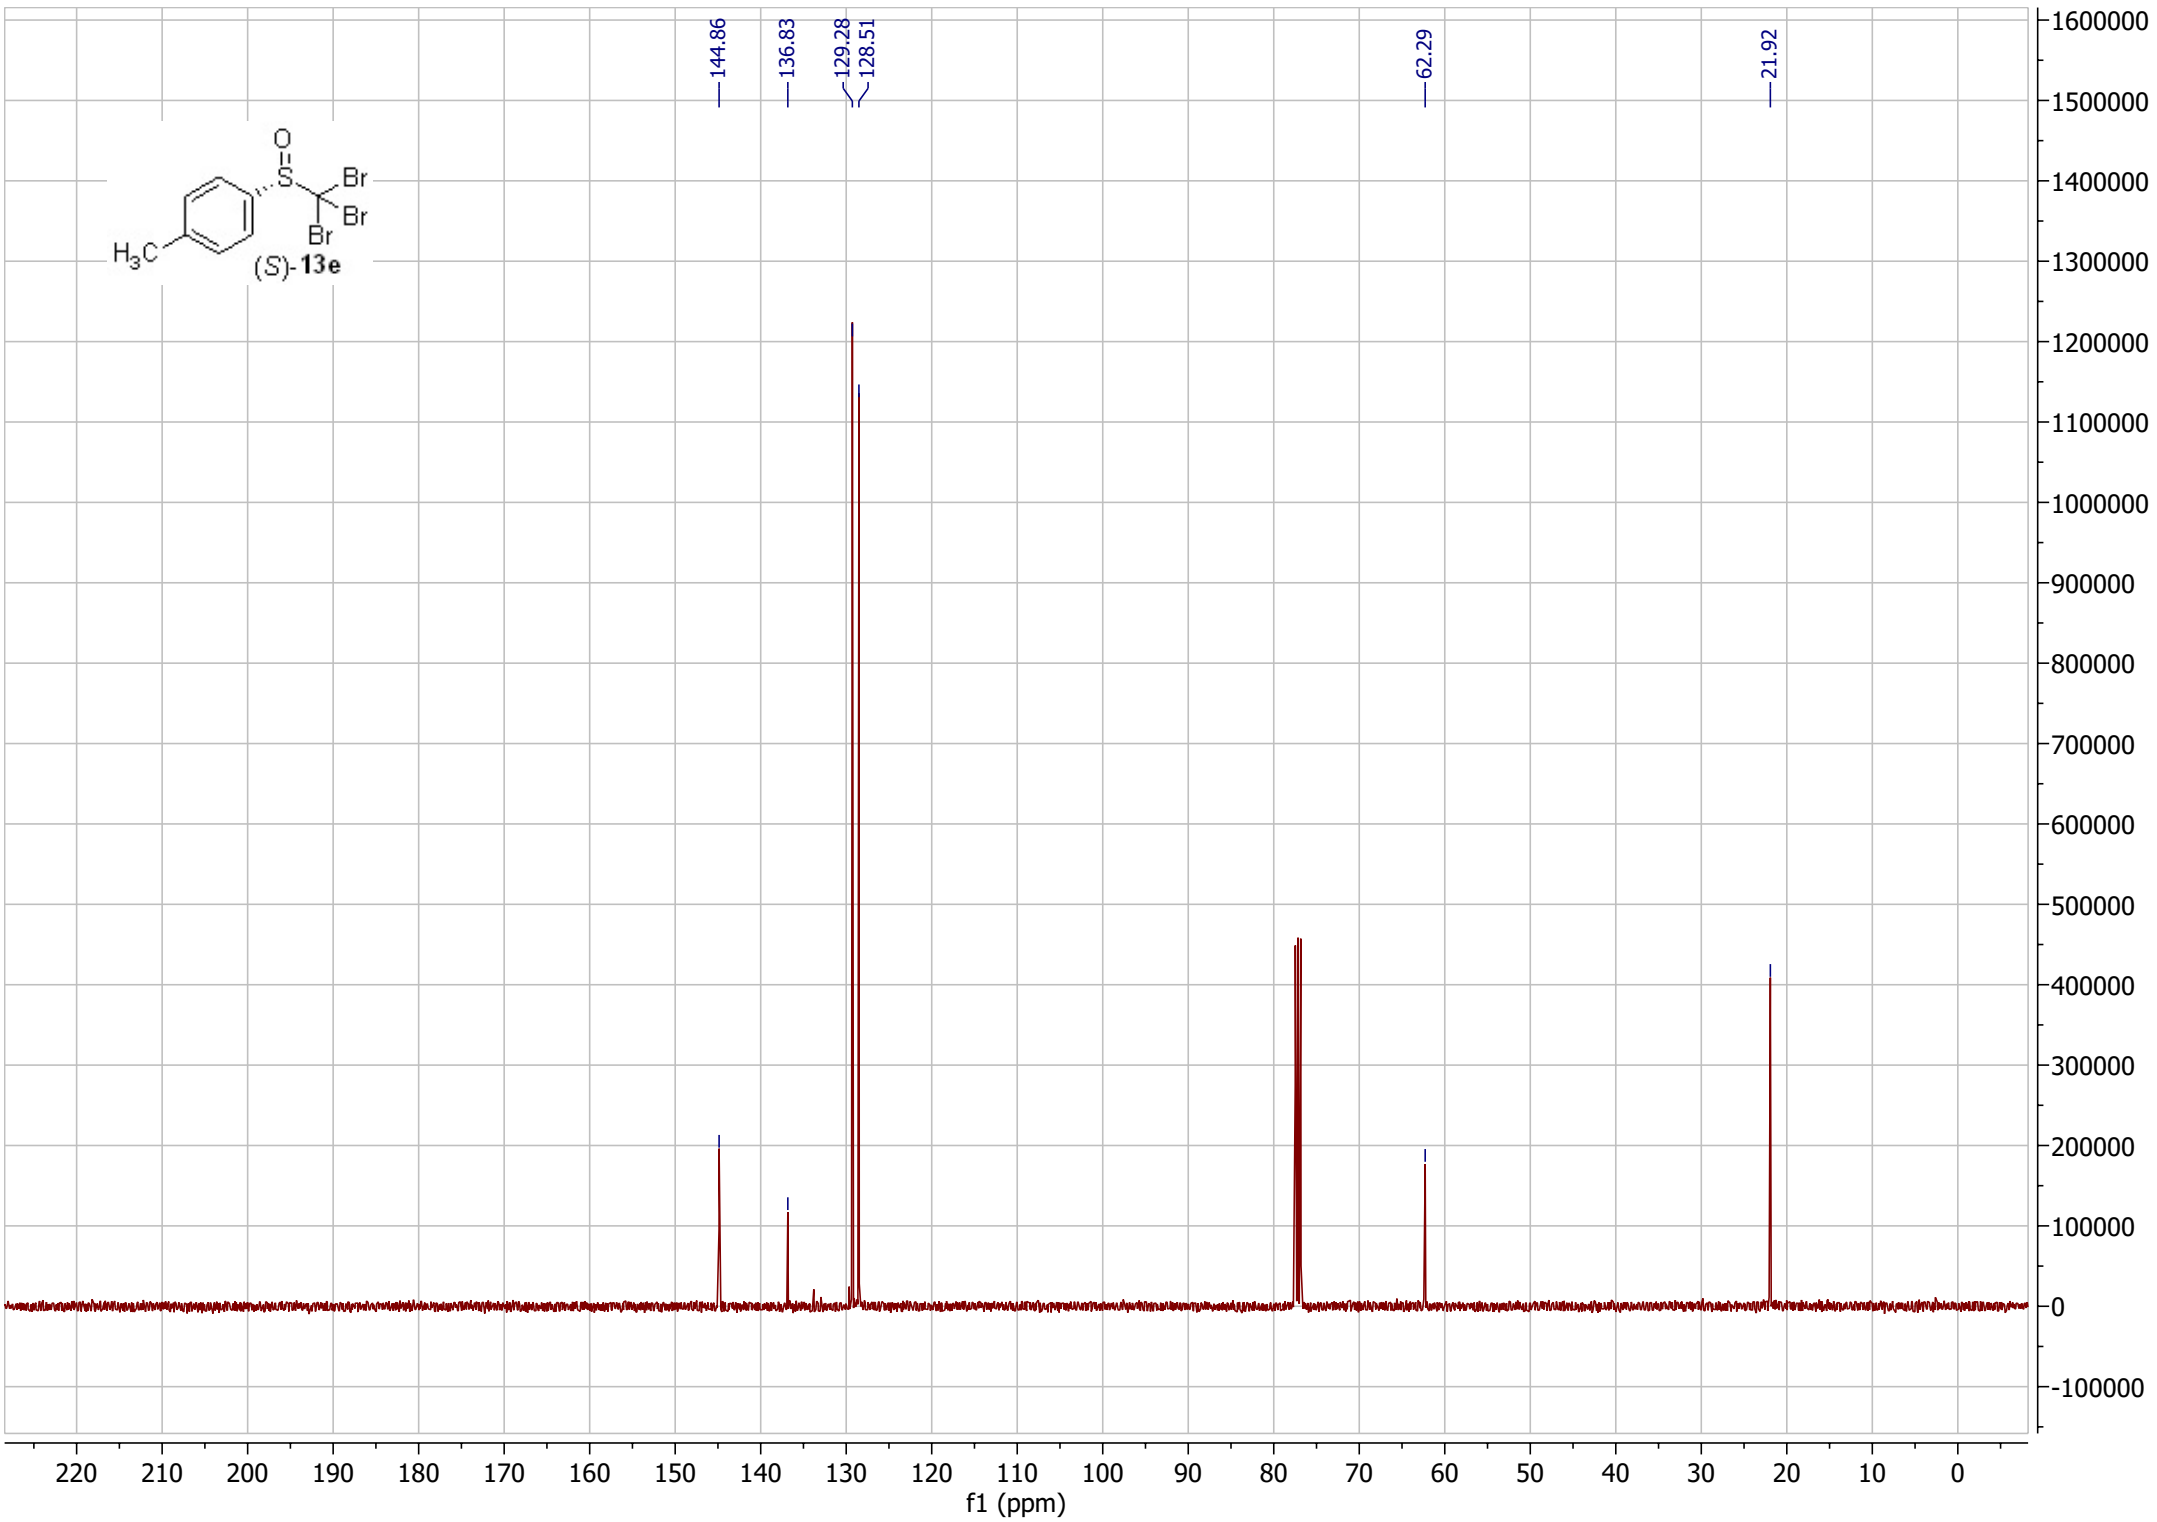

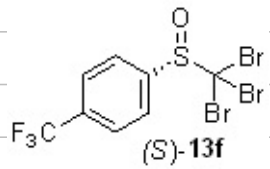

8.17  
8.15  
7.88  
7.88  
7.86  
7.83  
7.81

1.85

2.00

f1 (ppm)

24000000  
23000000  
22000000  
21000000  
20000000  
19000000  
18000000  
17000000  
16000000  
15000000  
14000000  
13000000  
12000000  
11000000  
10000000  
9000000  
8000000  
7000000  
6000000  
5000000  
4000000  
3000000  
2000000  
1000000  
0  
-1000000  
-2000000

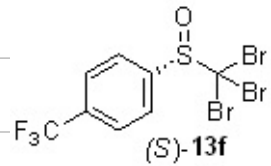

144.11  
135.85  
135.52  
135.19  
134.86  
129.12  
125.66  
125.62  
125.59  
125.55  
124.77  
122.06

59.44

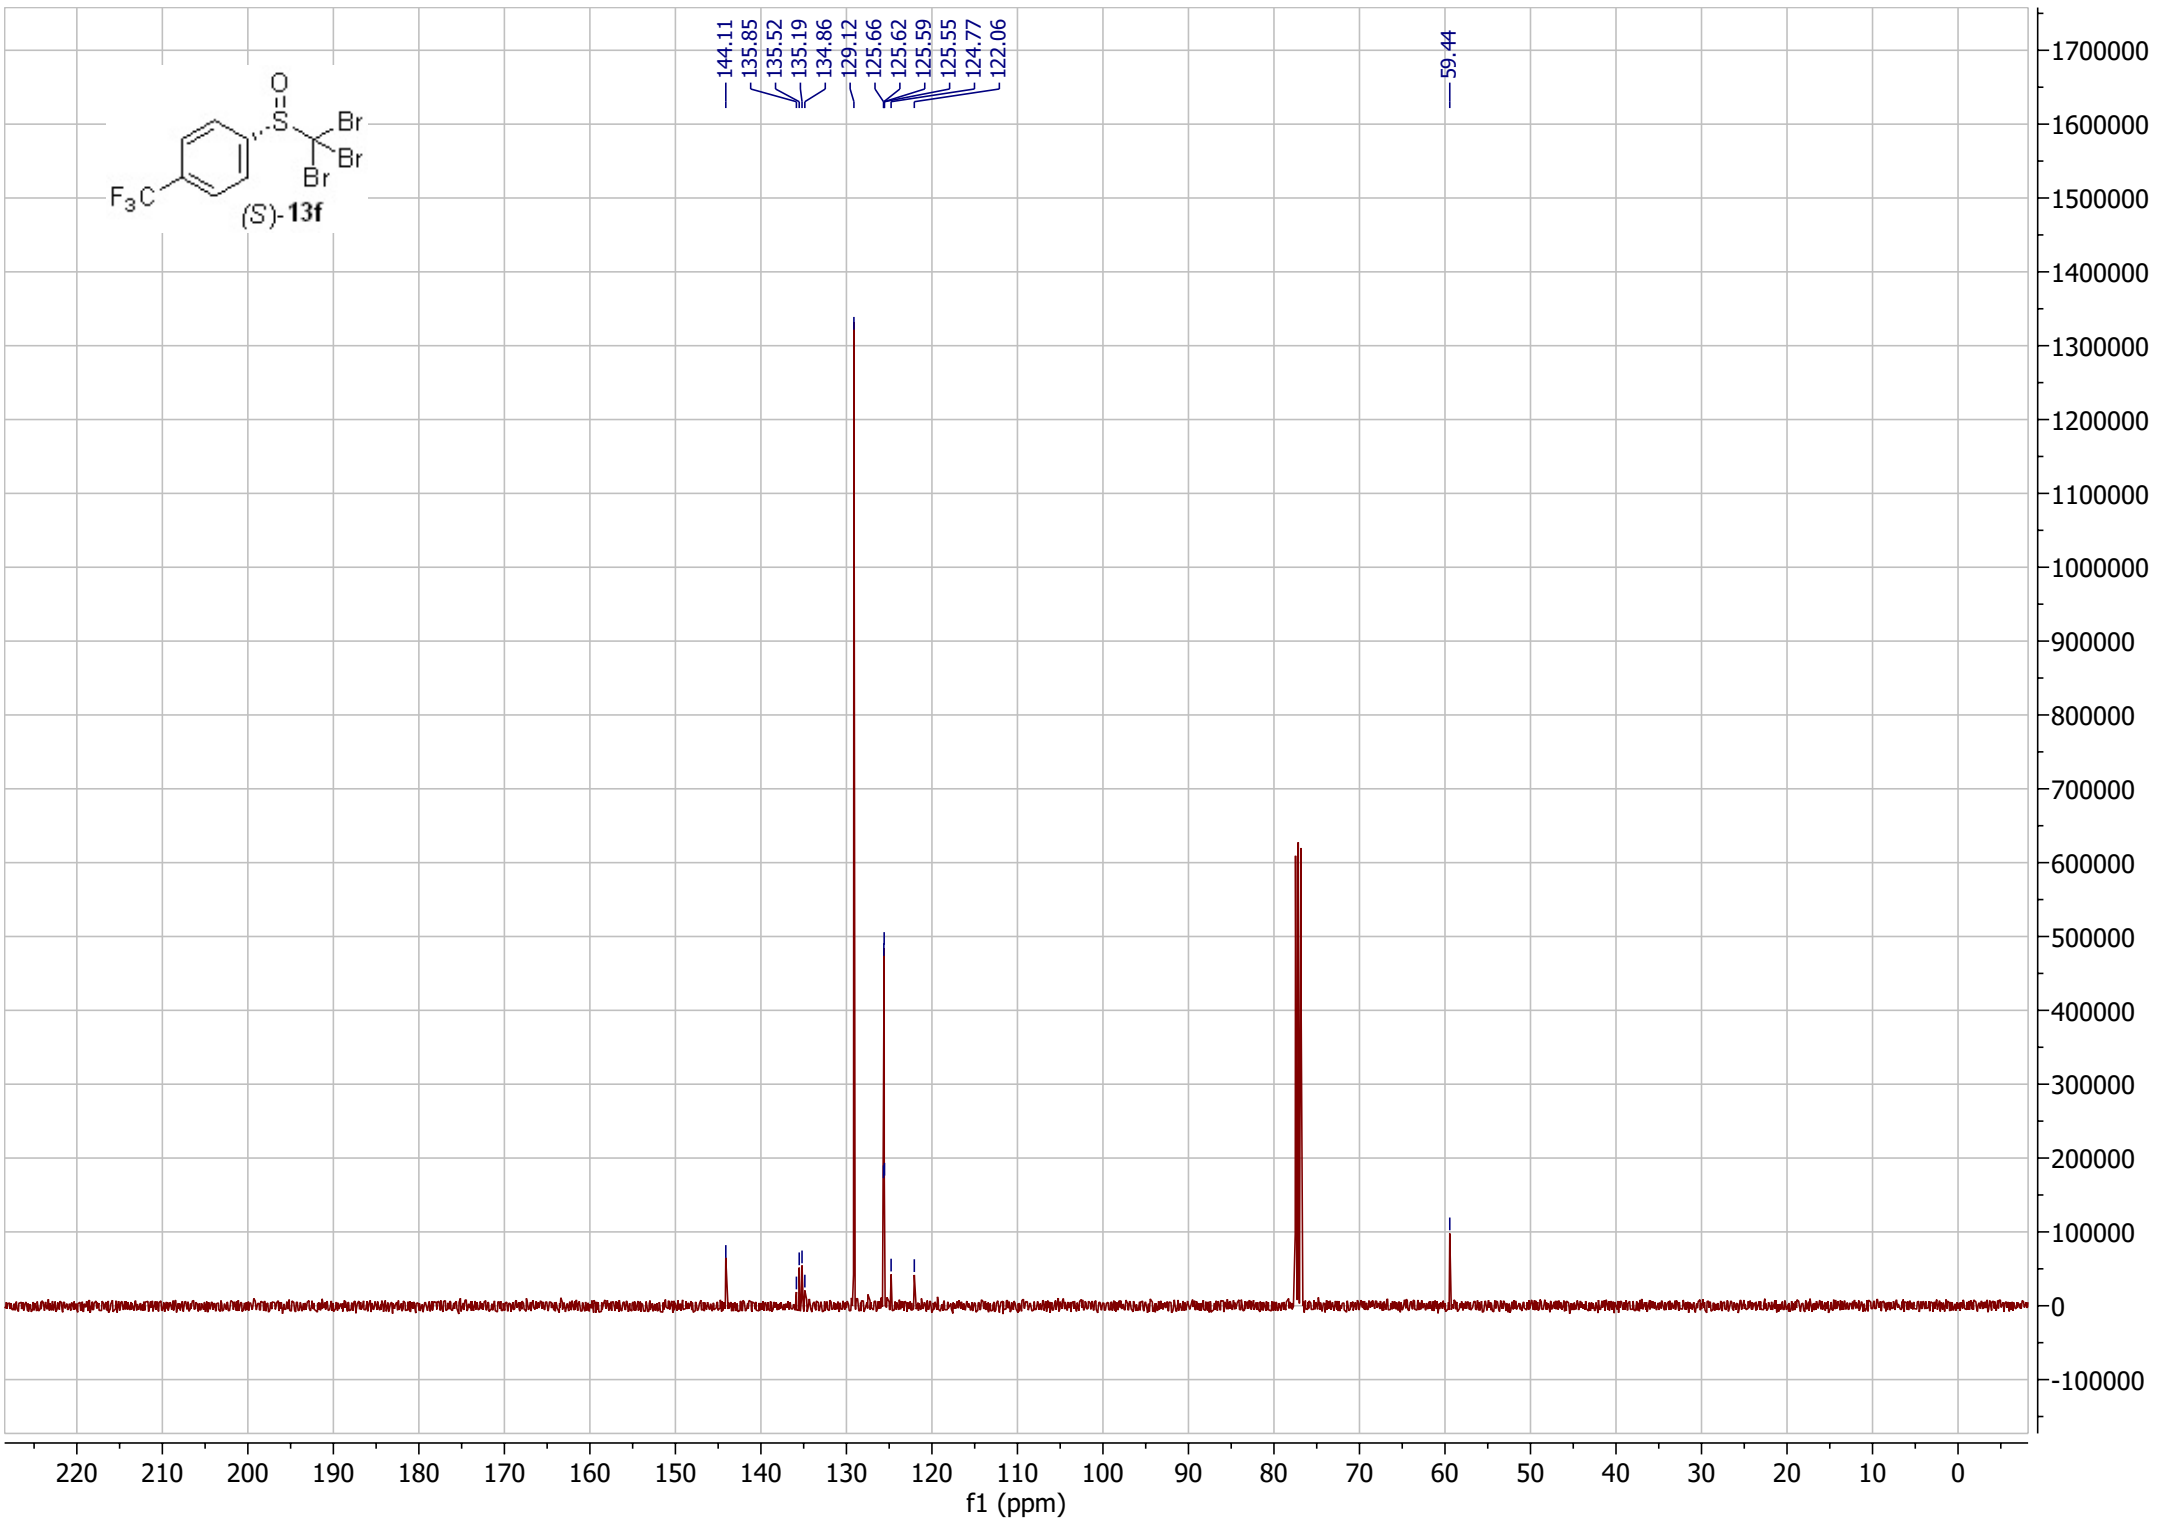

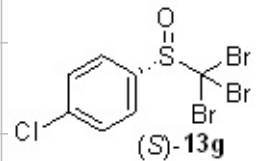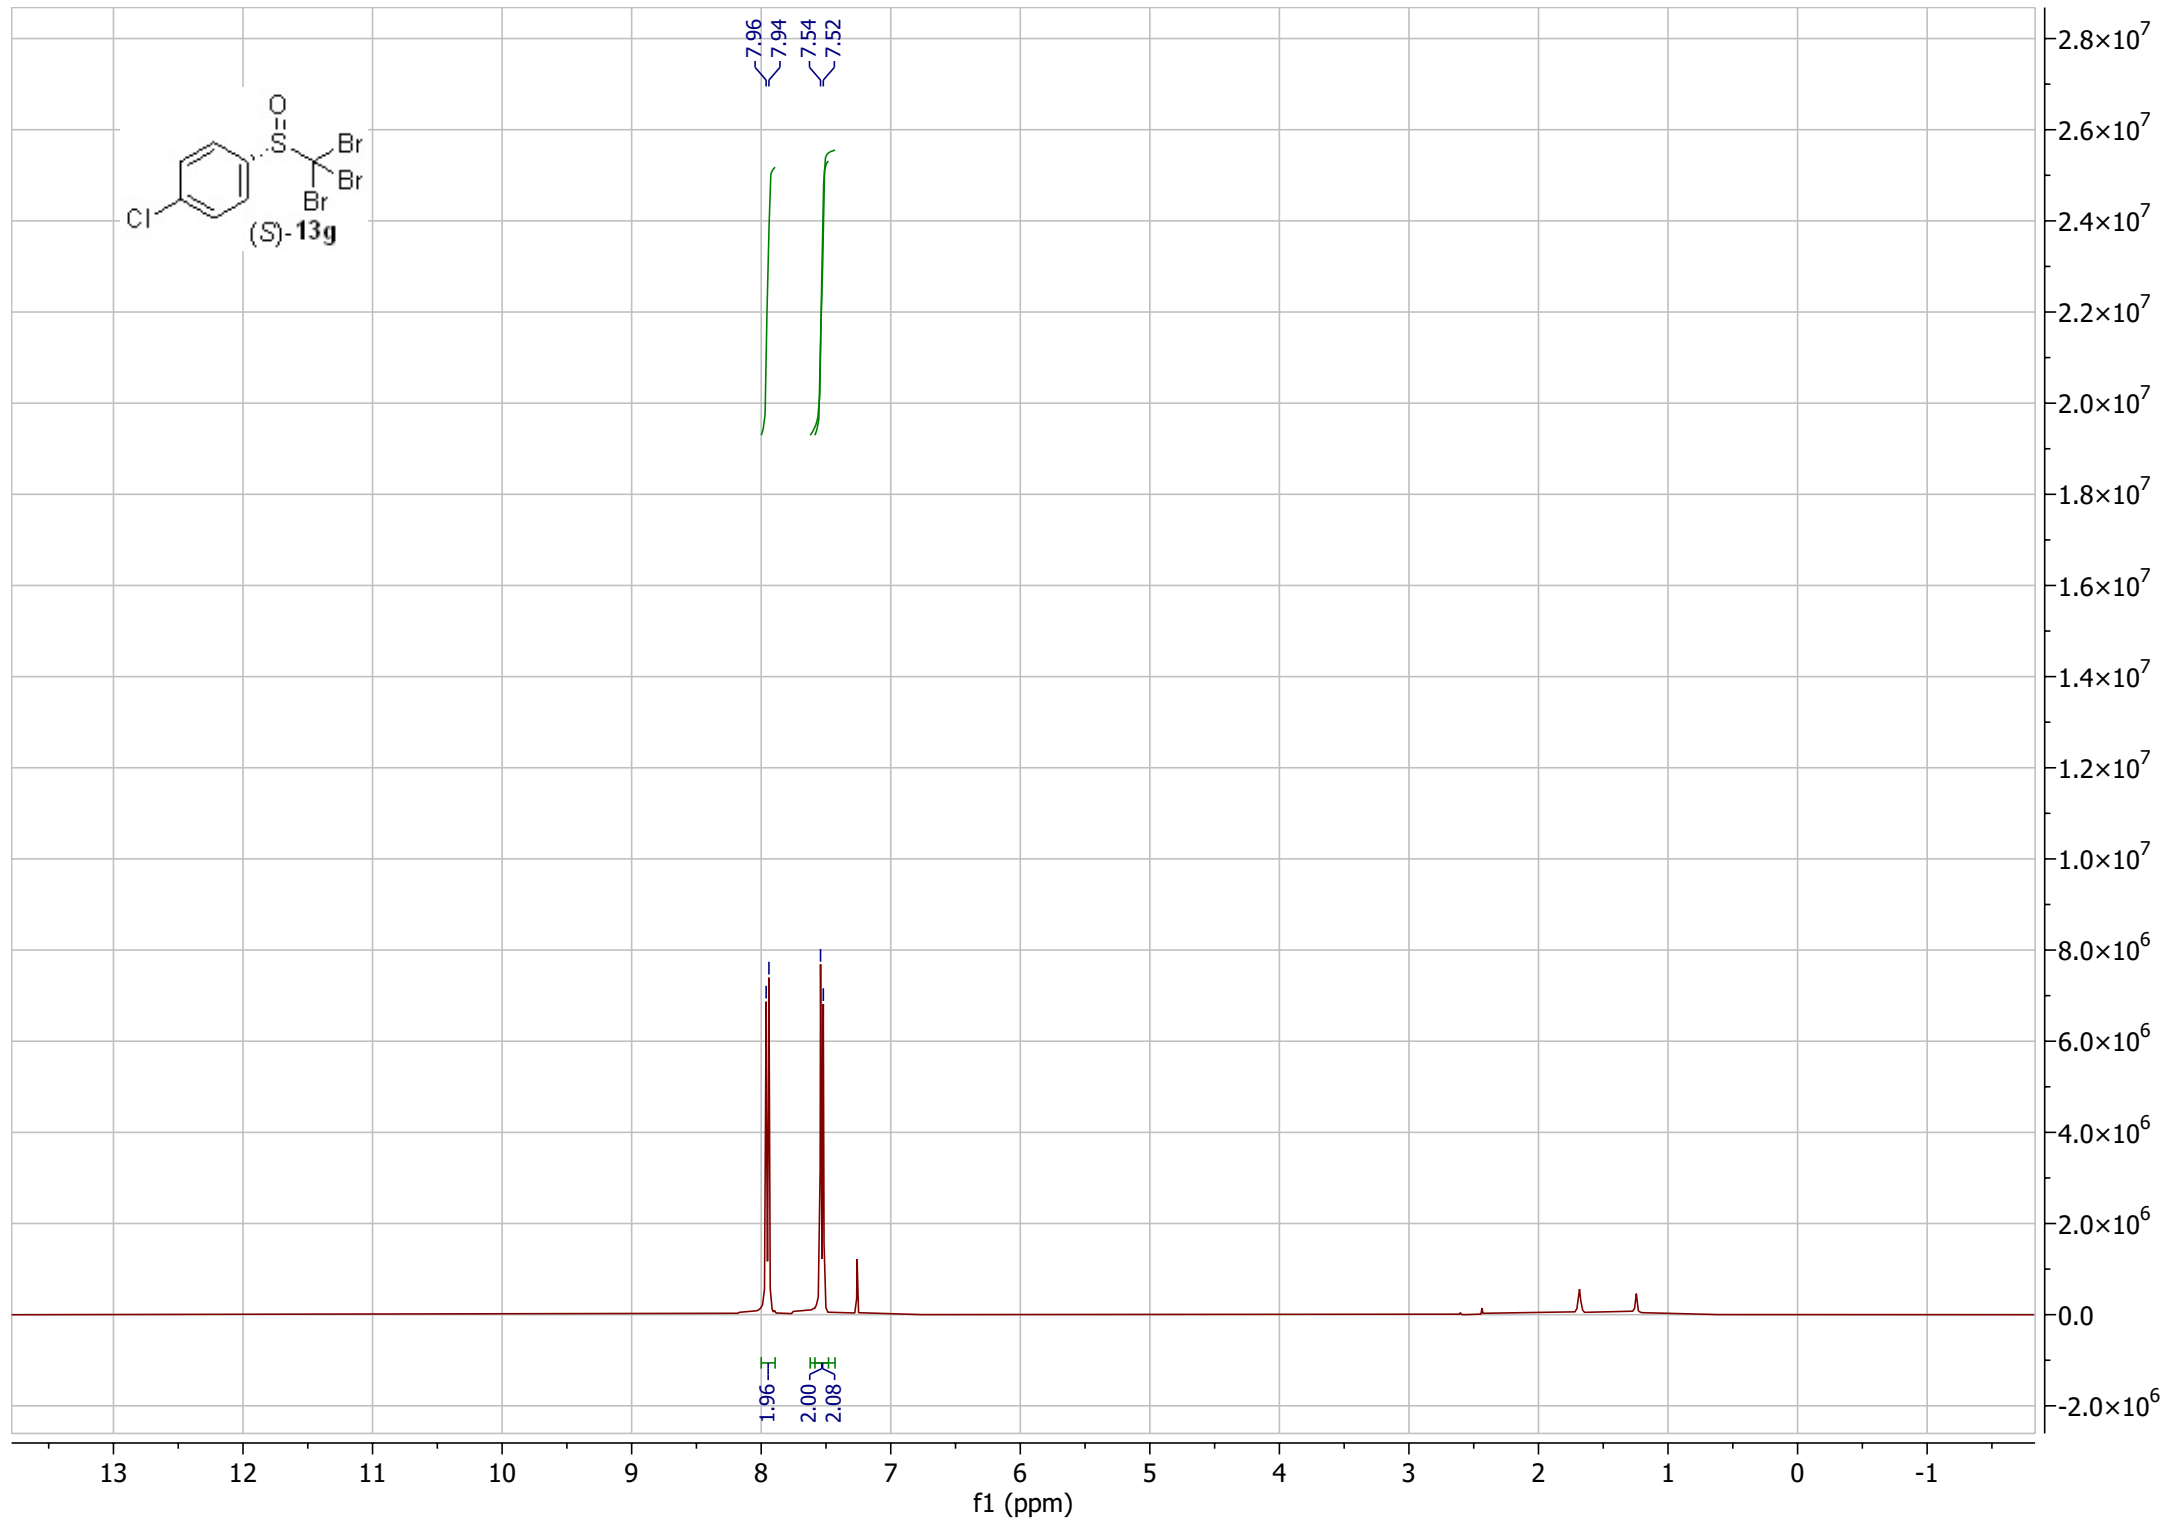

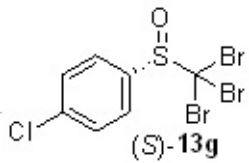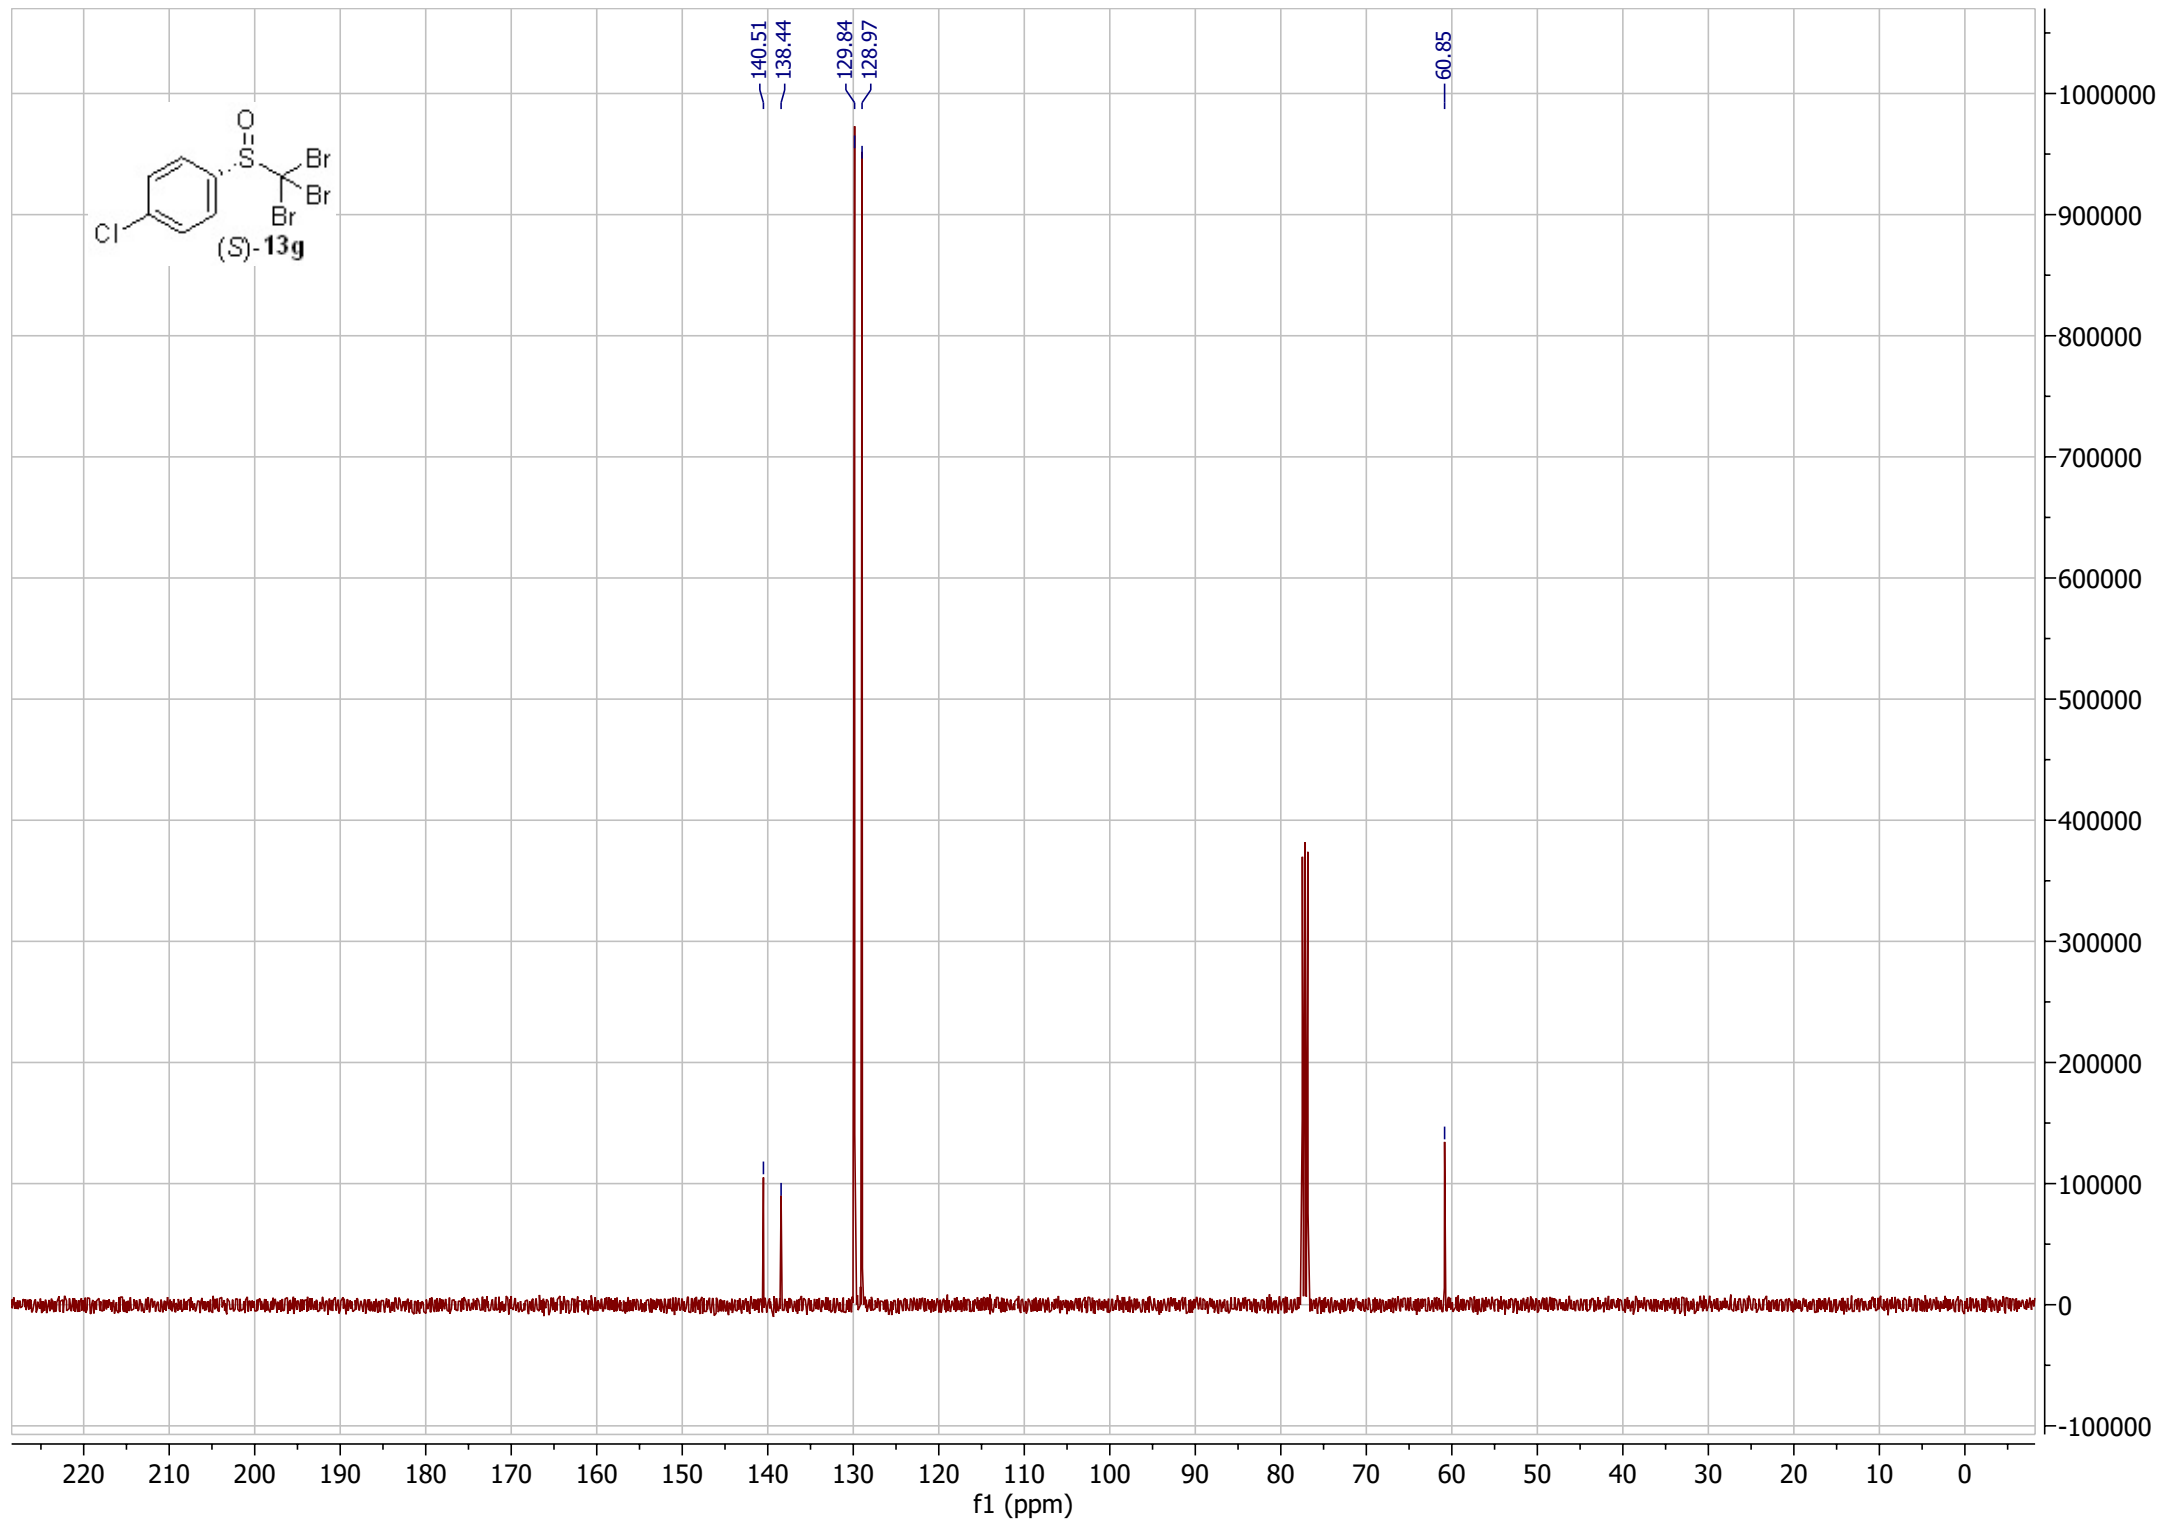



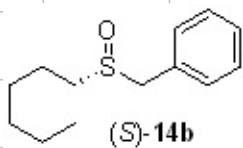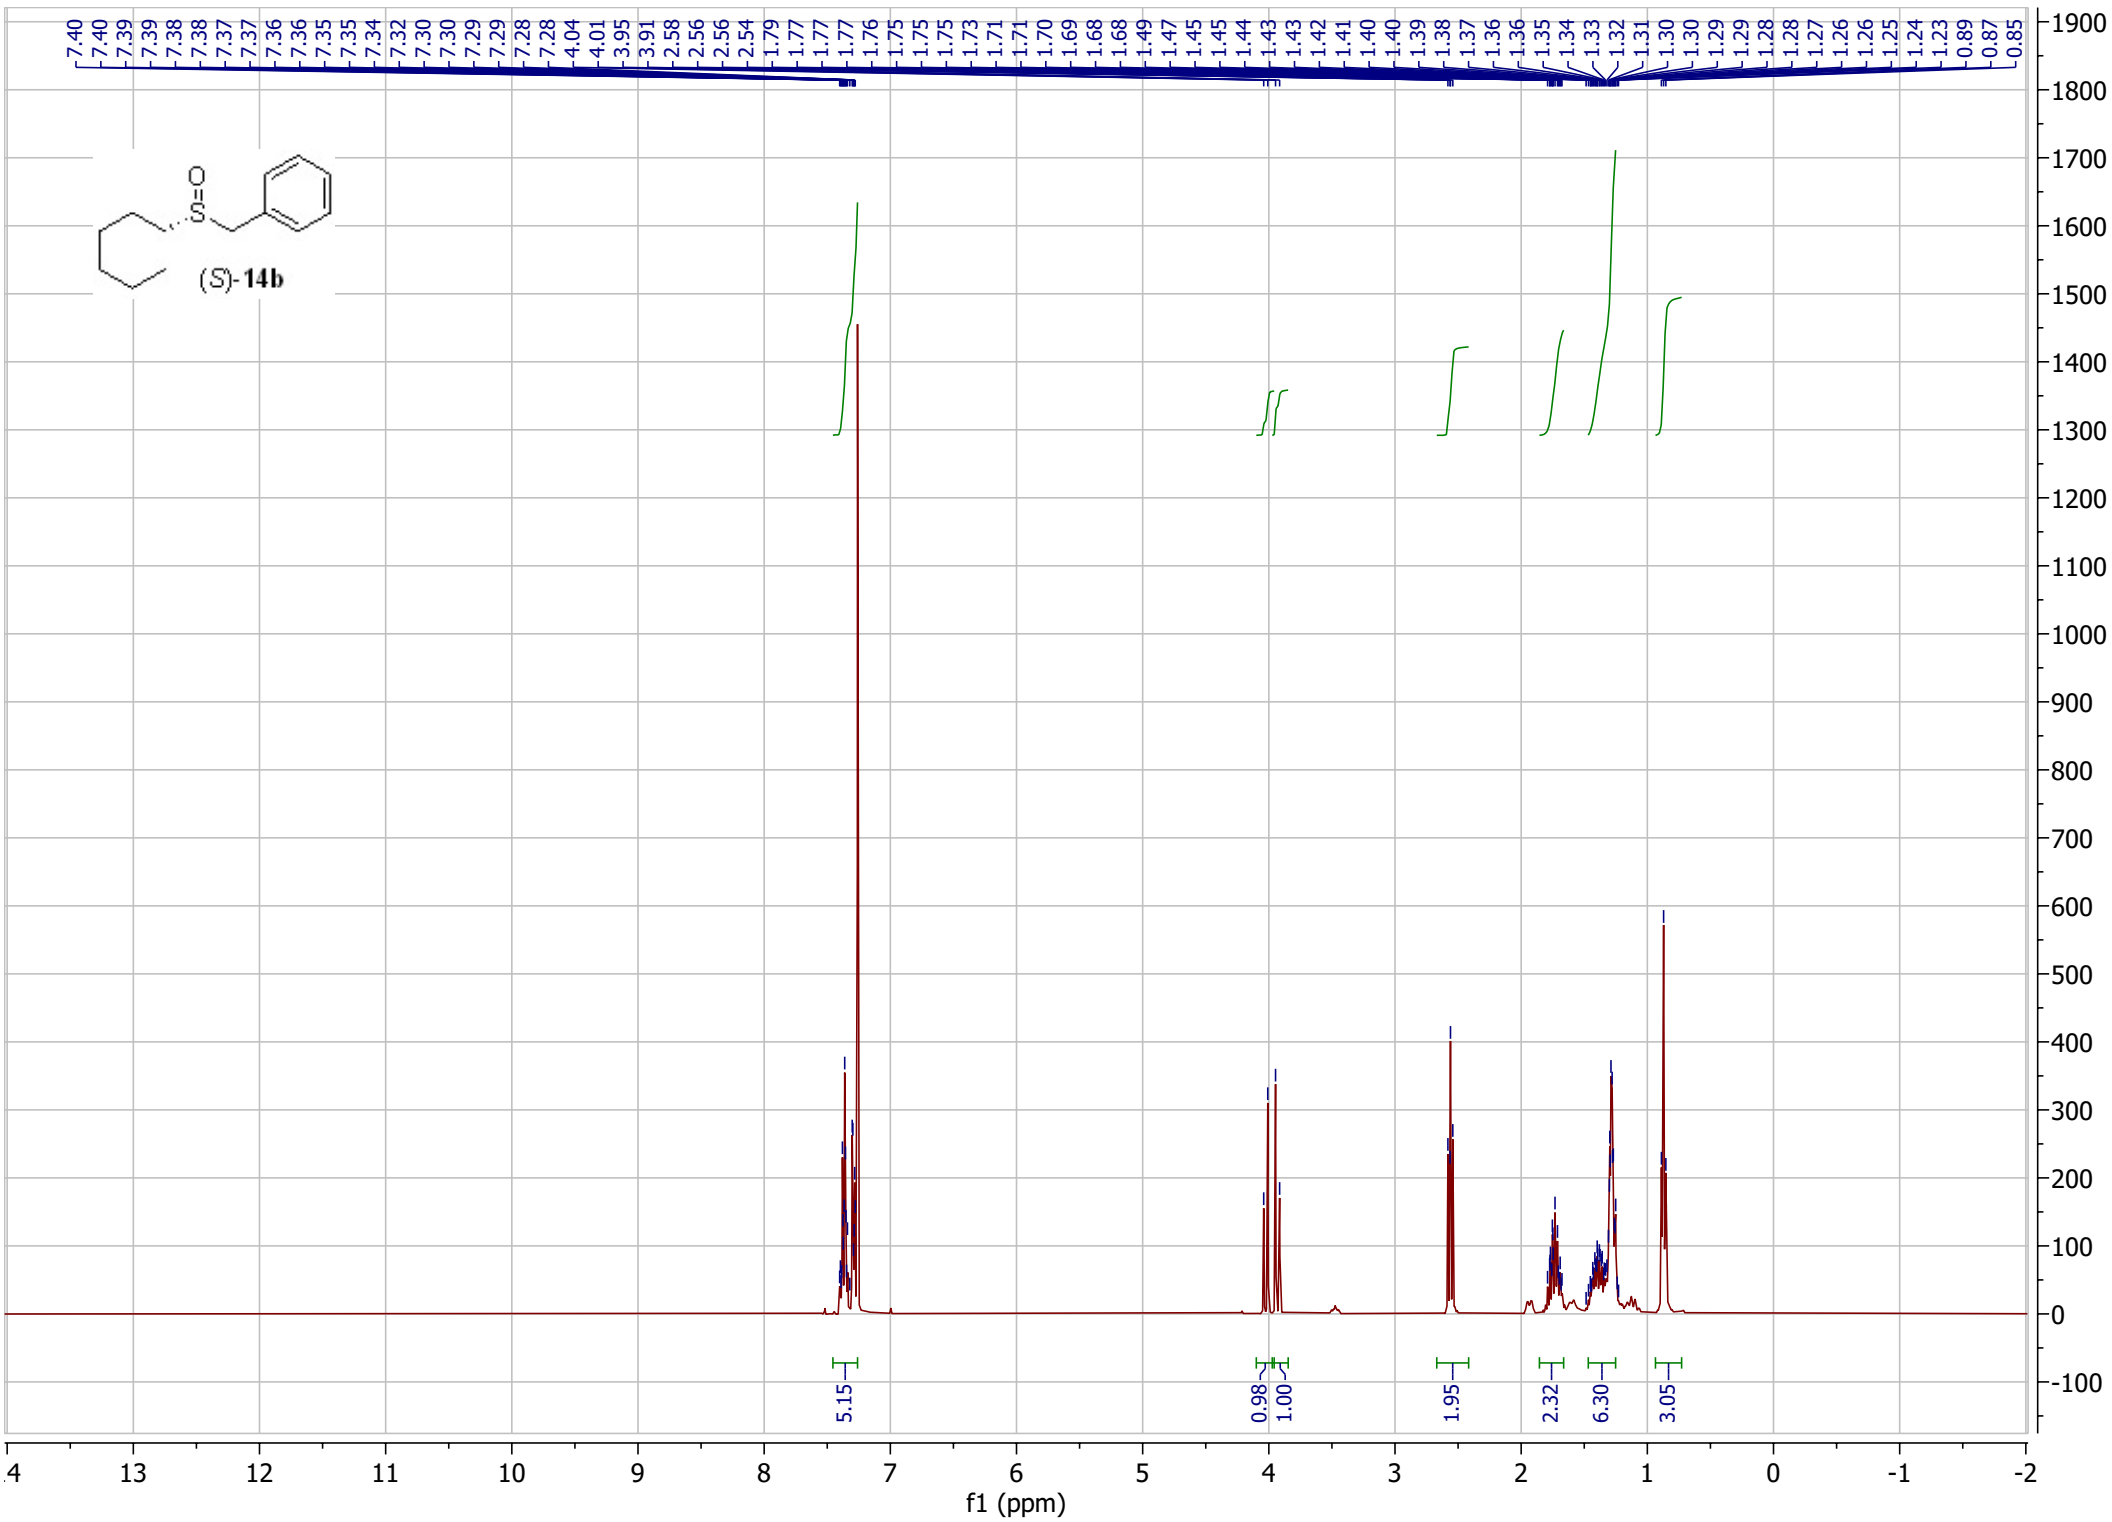

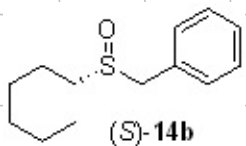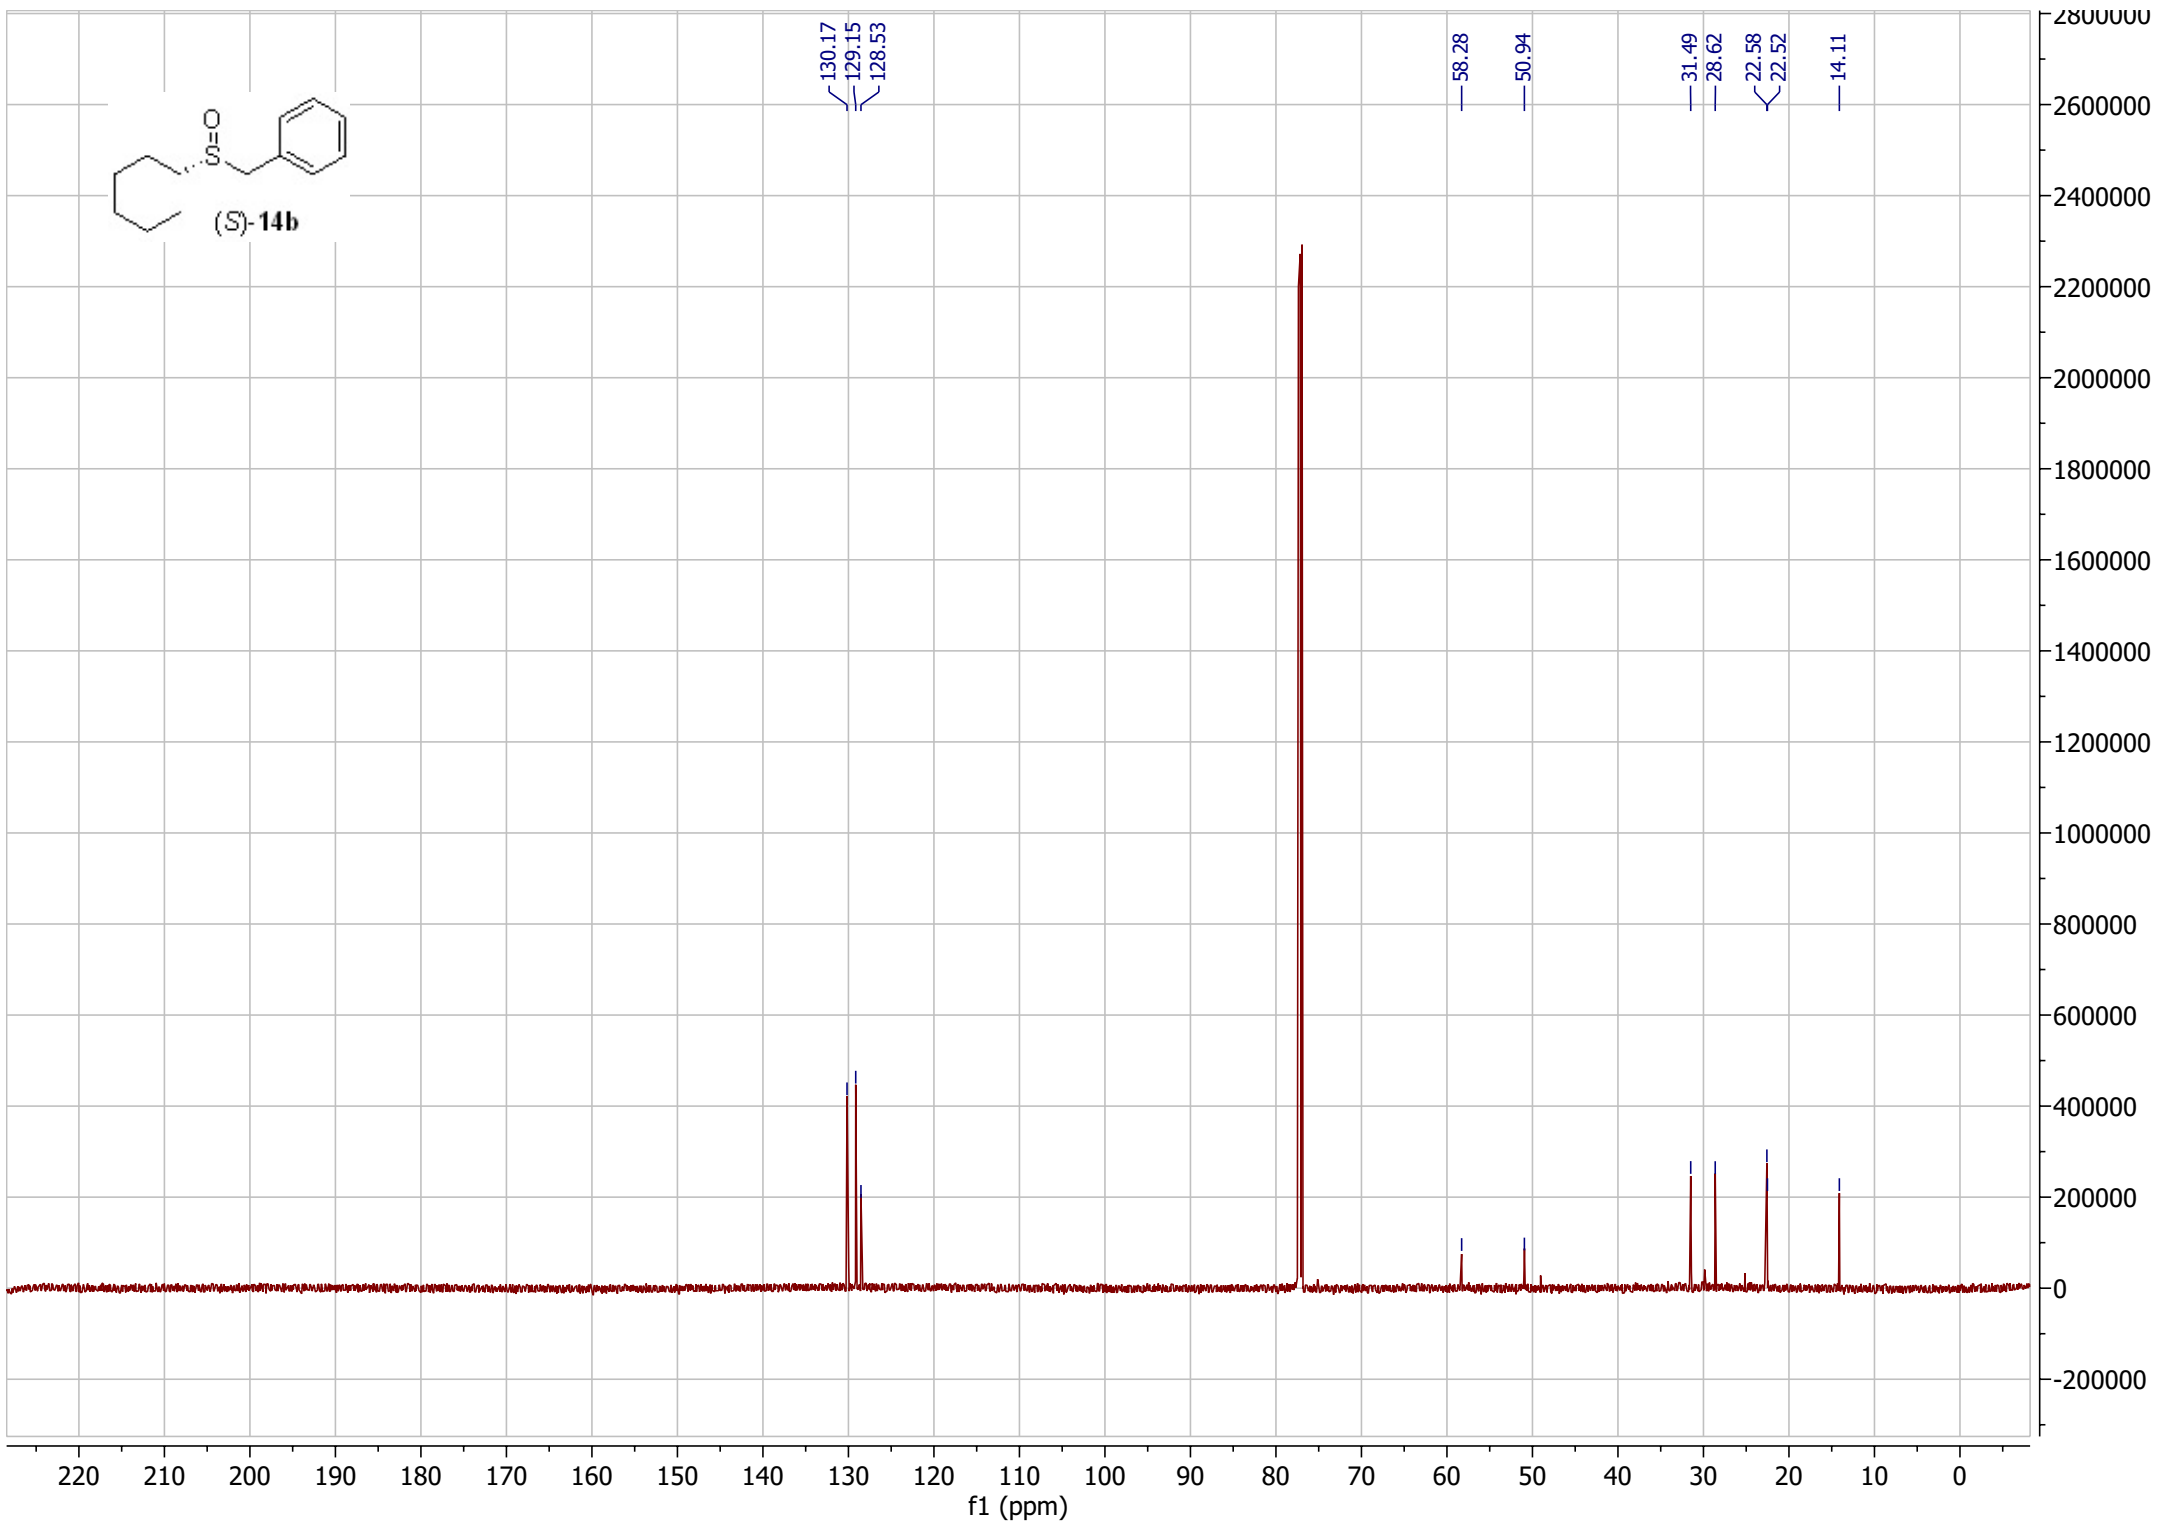

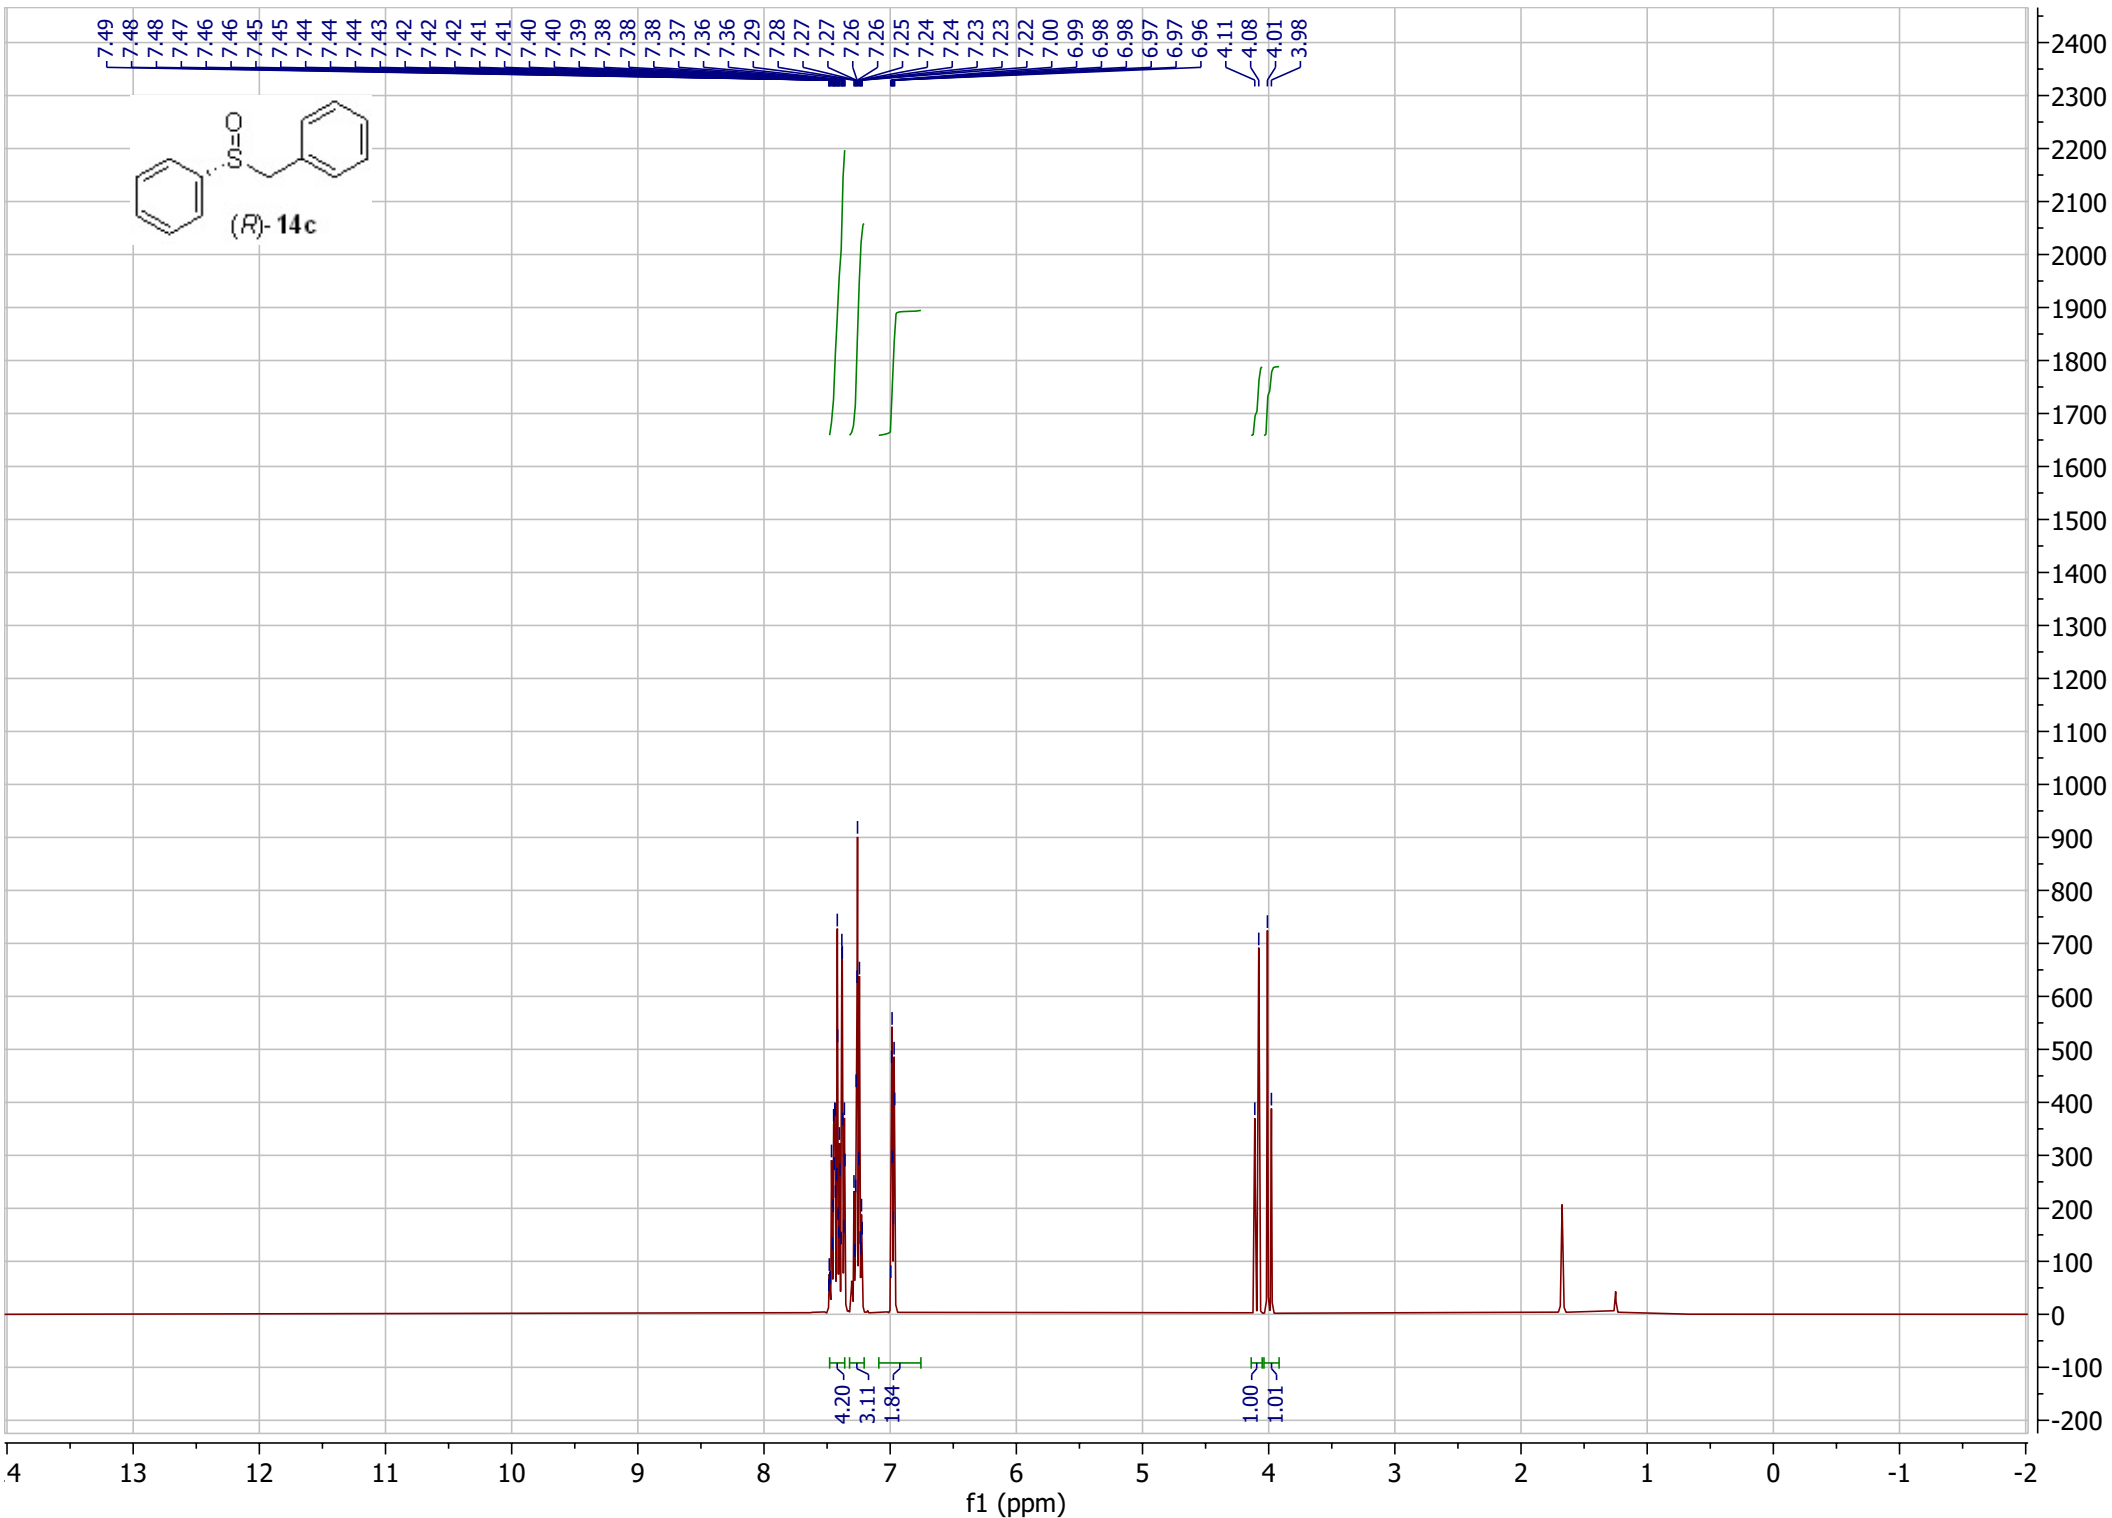

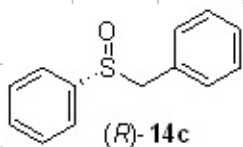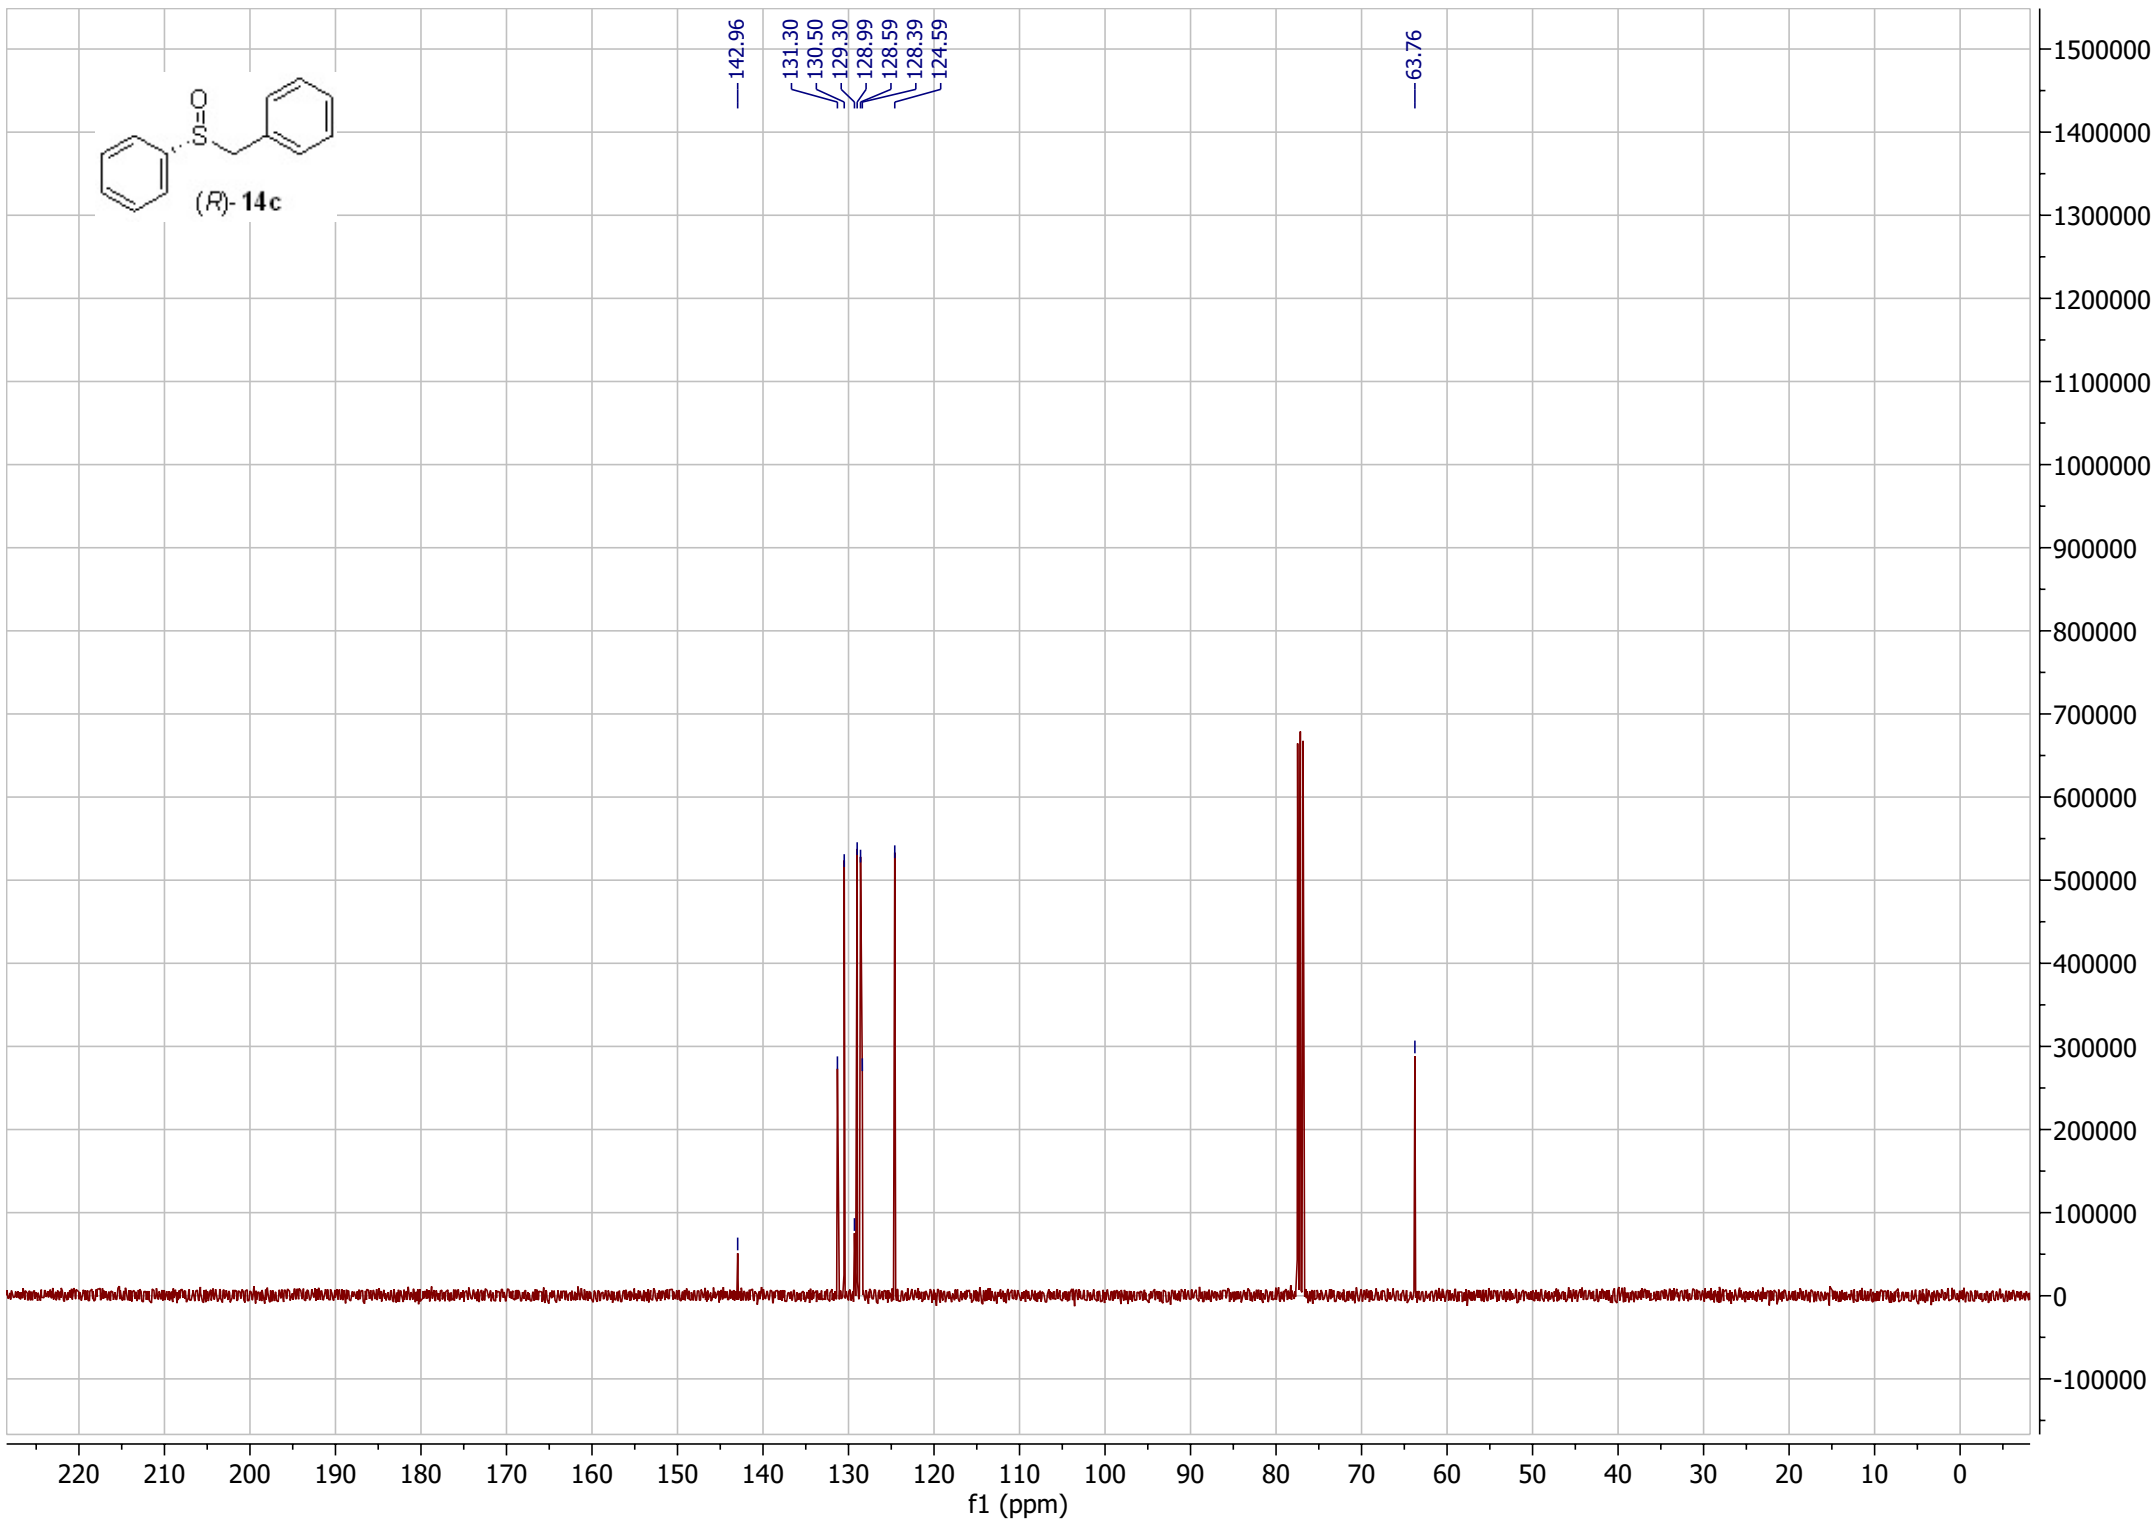

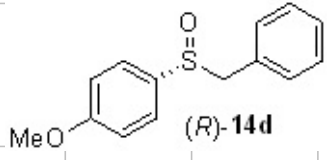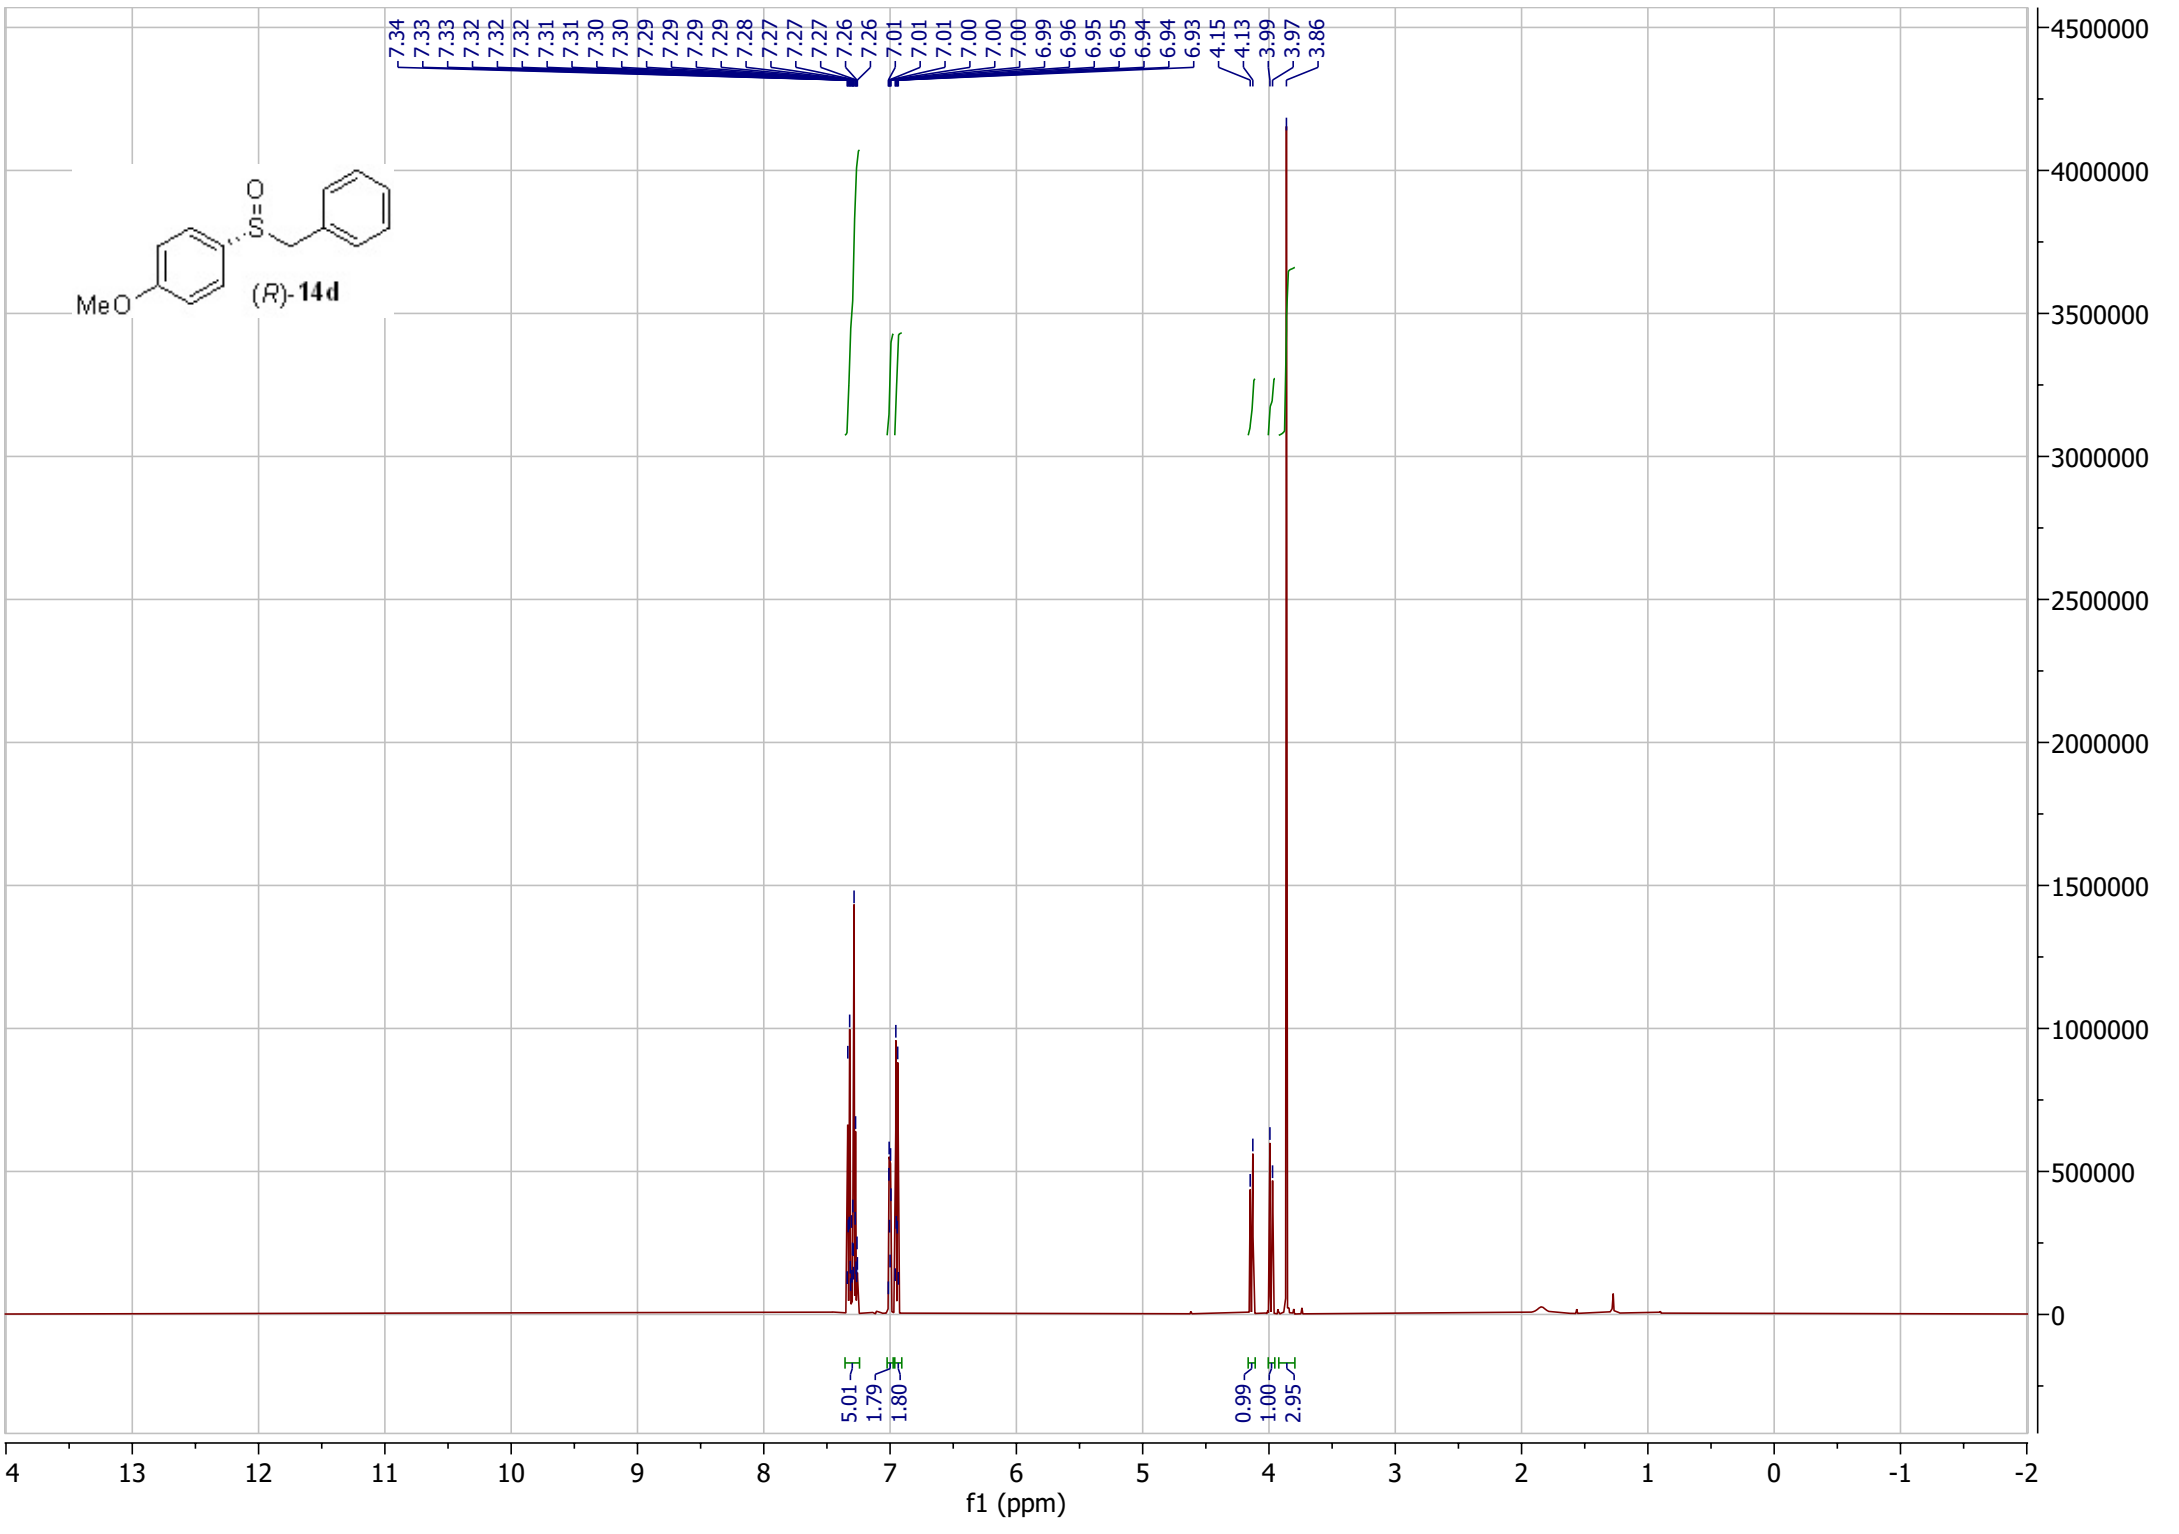

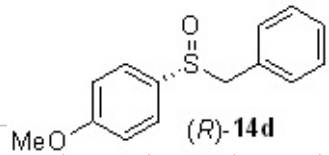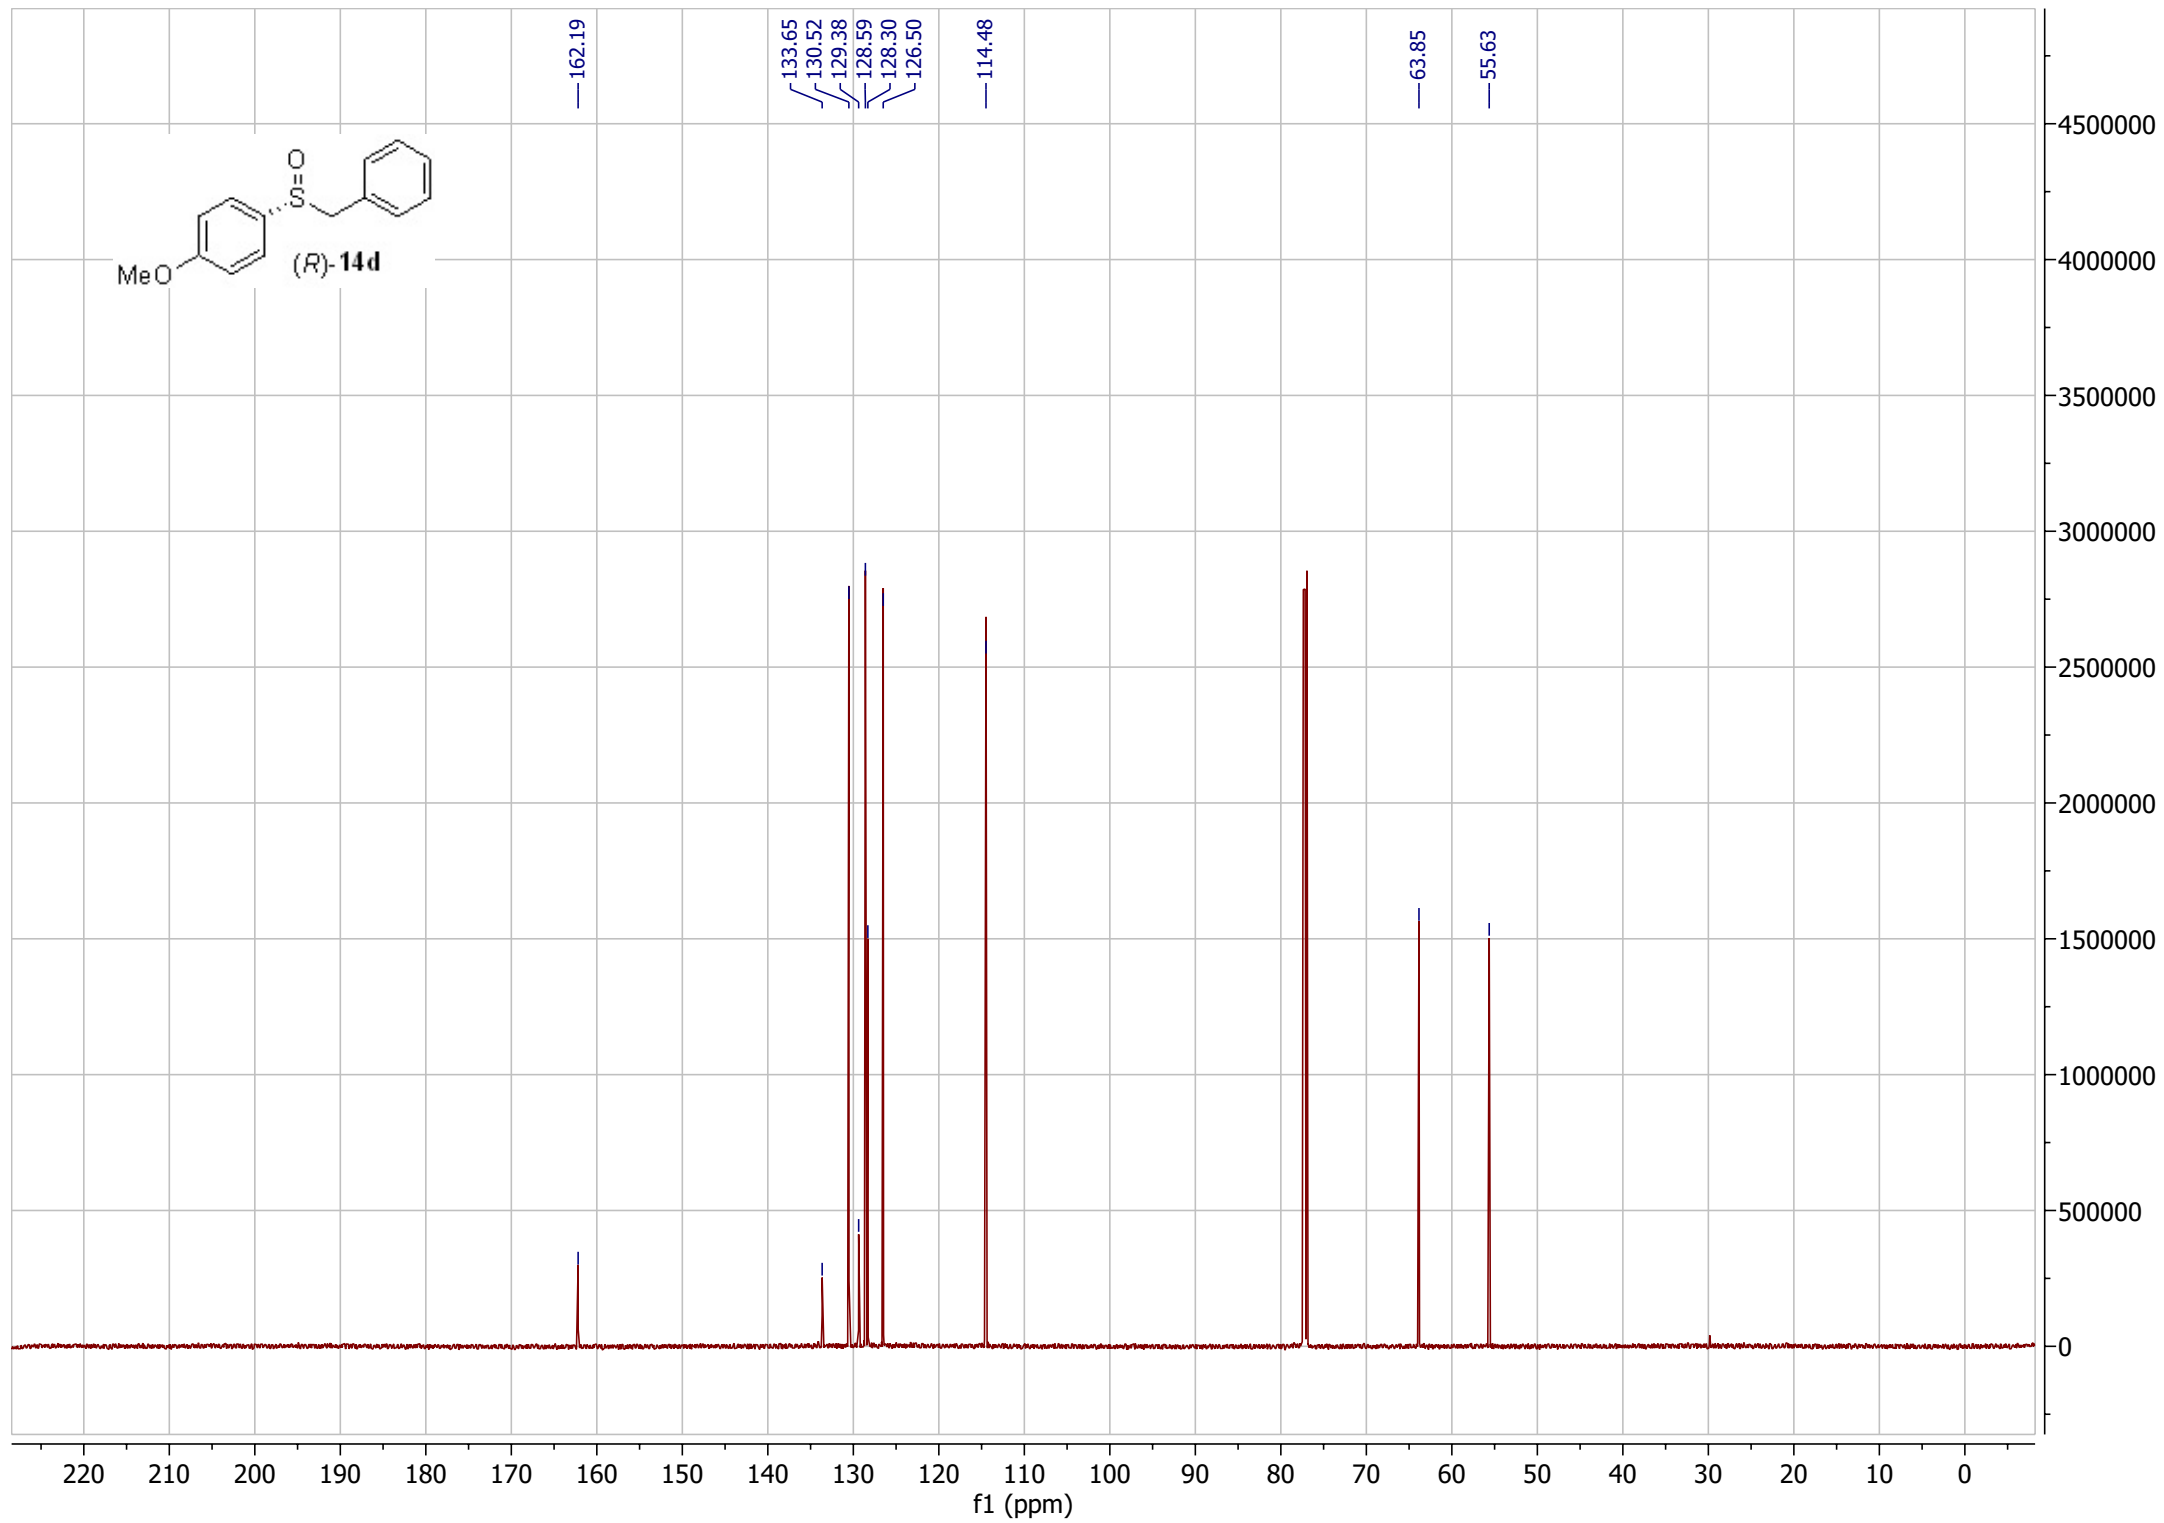

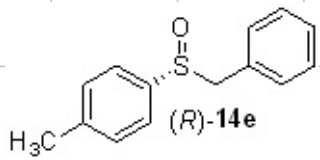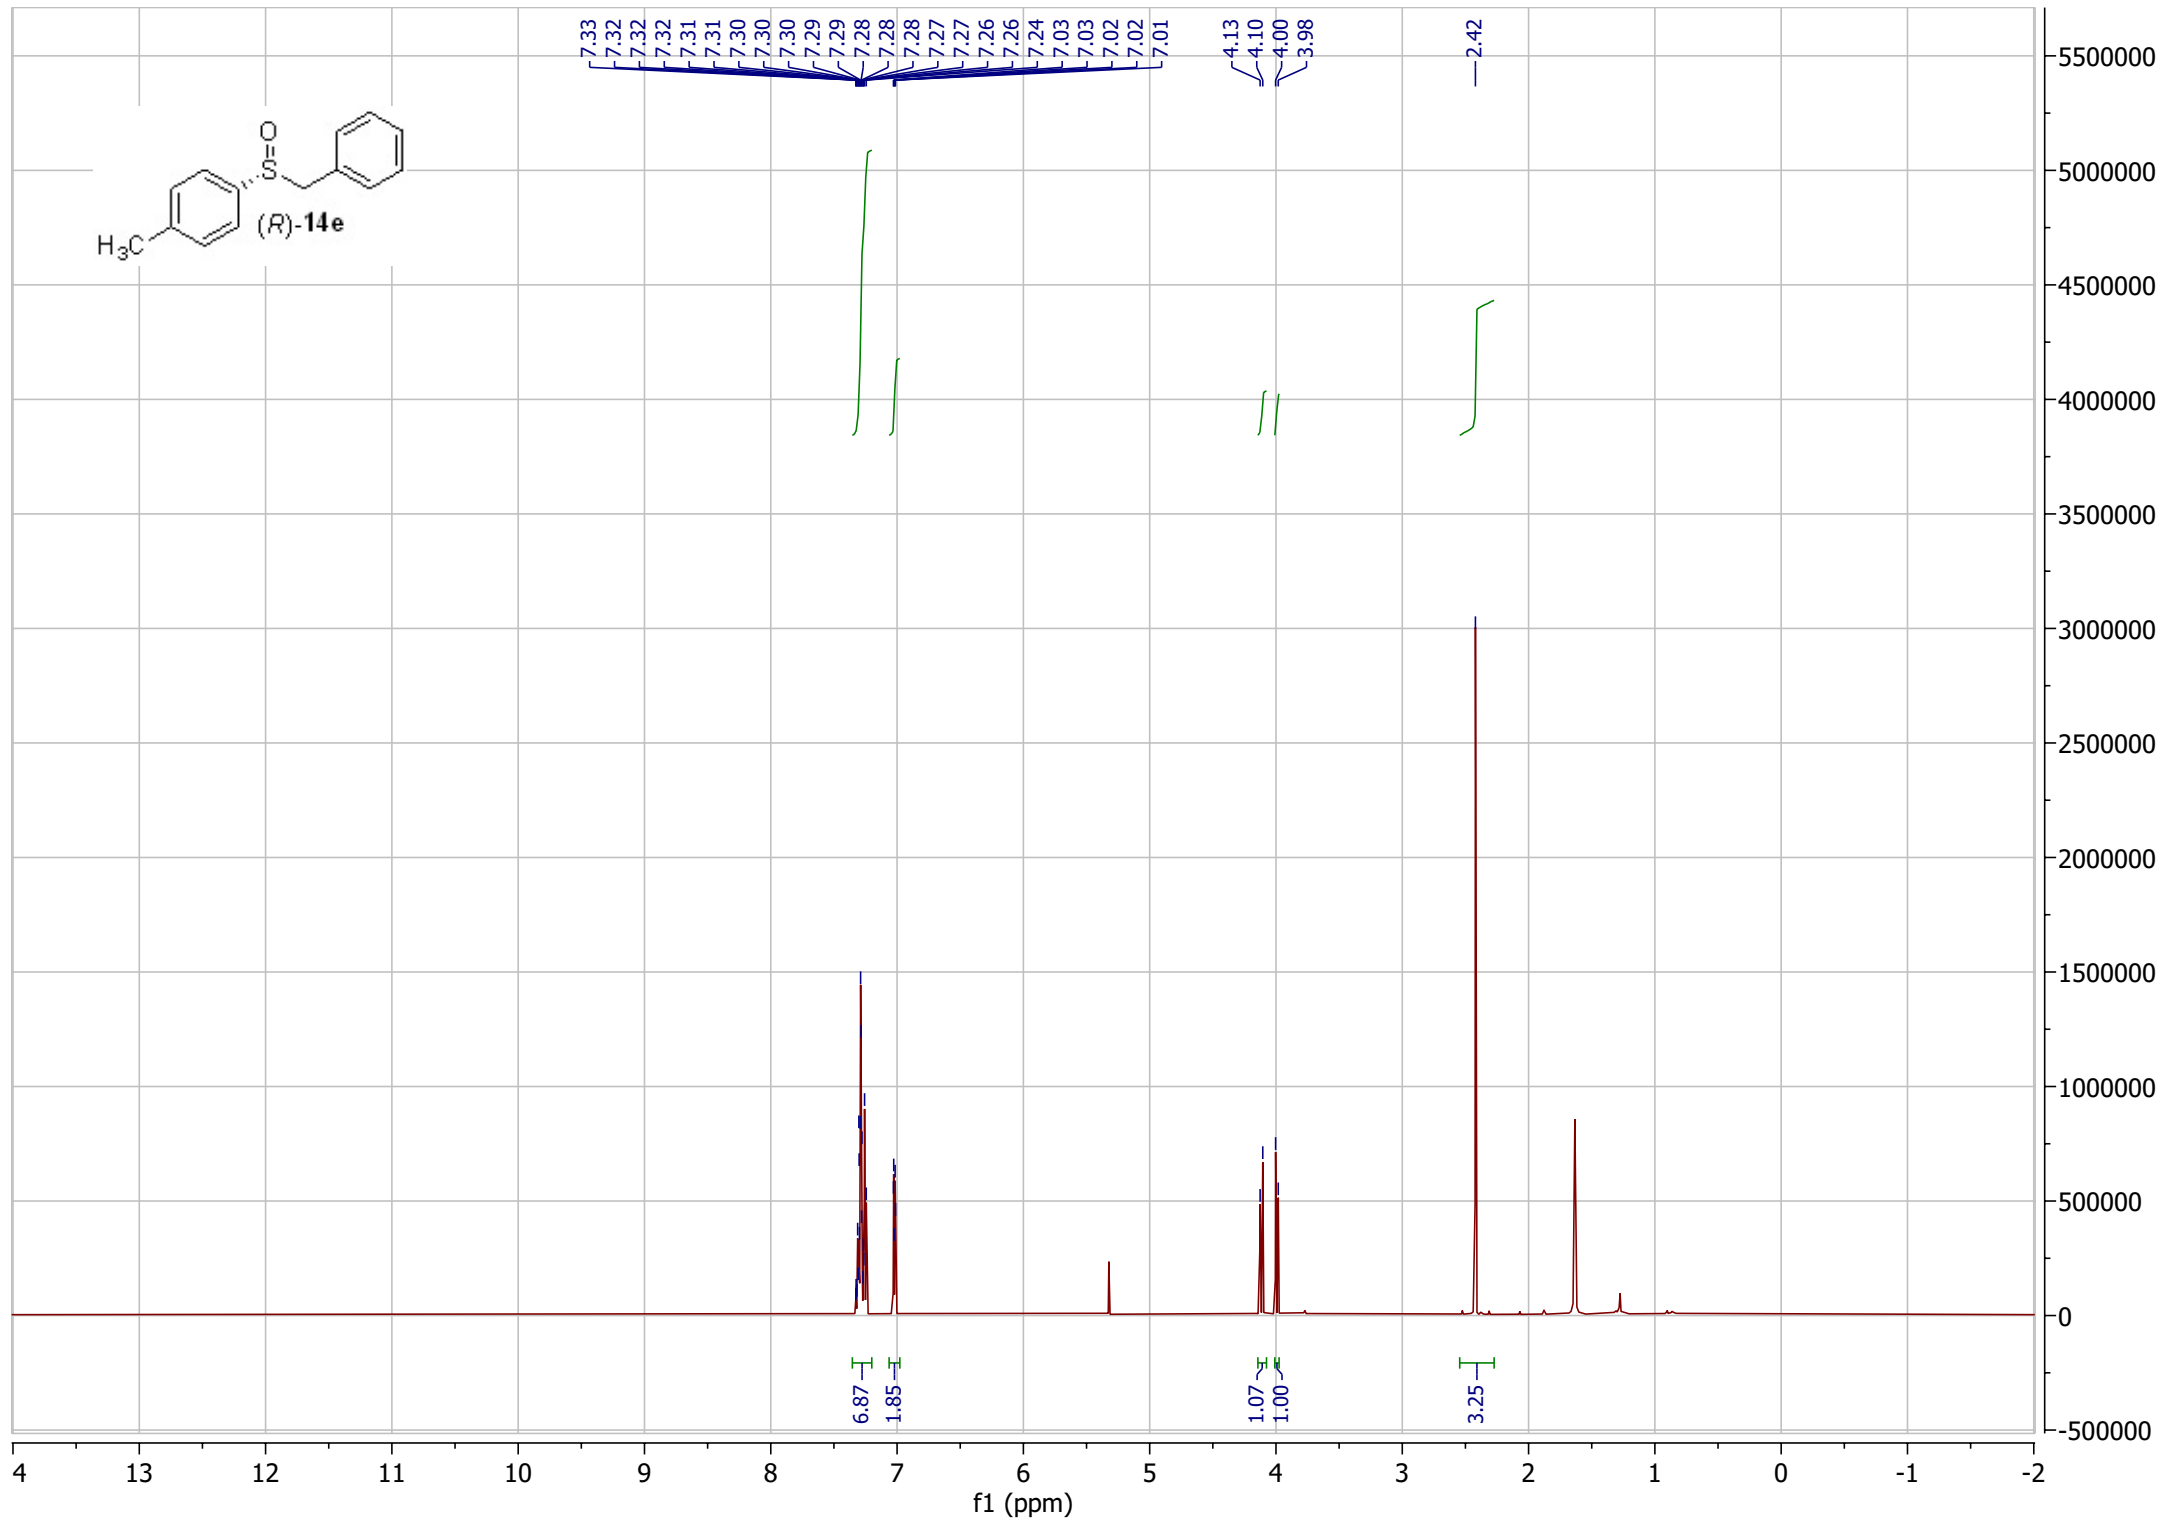

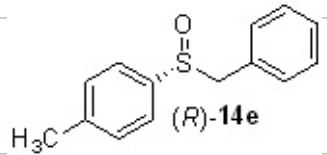

141.78  
139.66  
130.51  
129.71  
129.46  
128.60  
128.33  
124.61

63.83

21.60

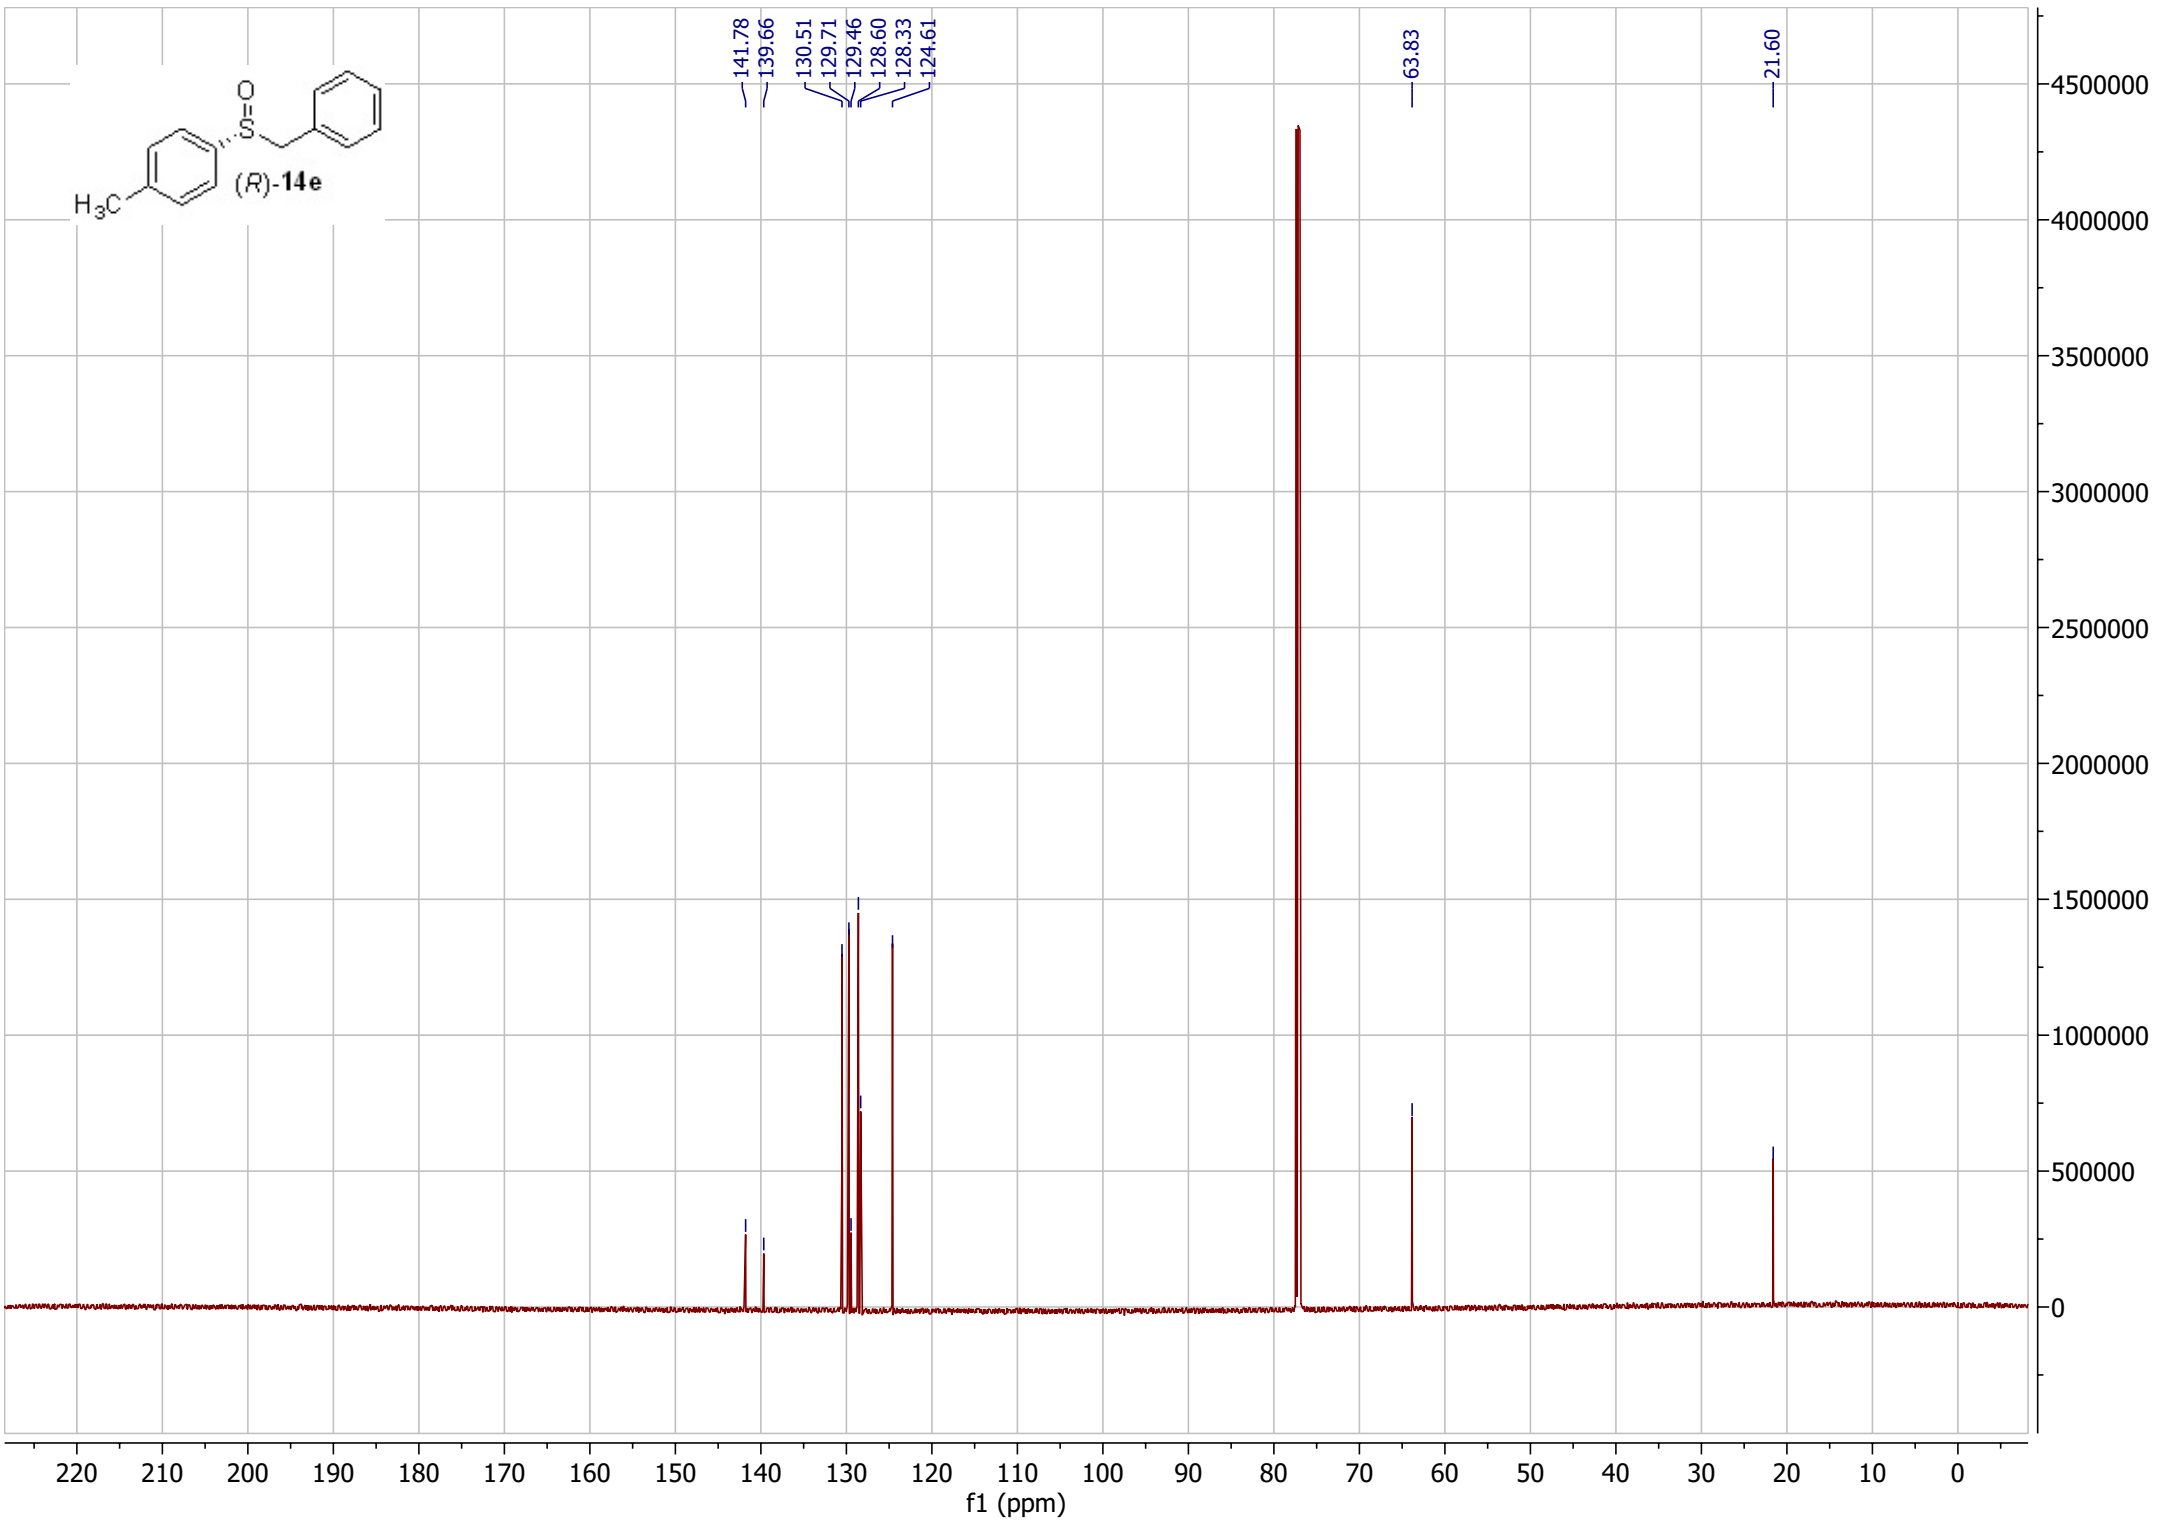



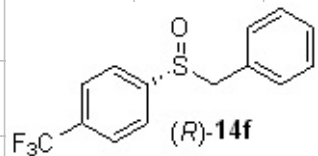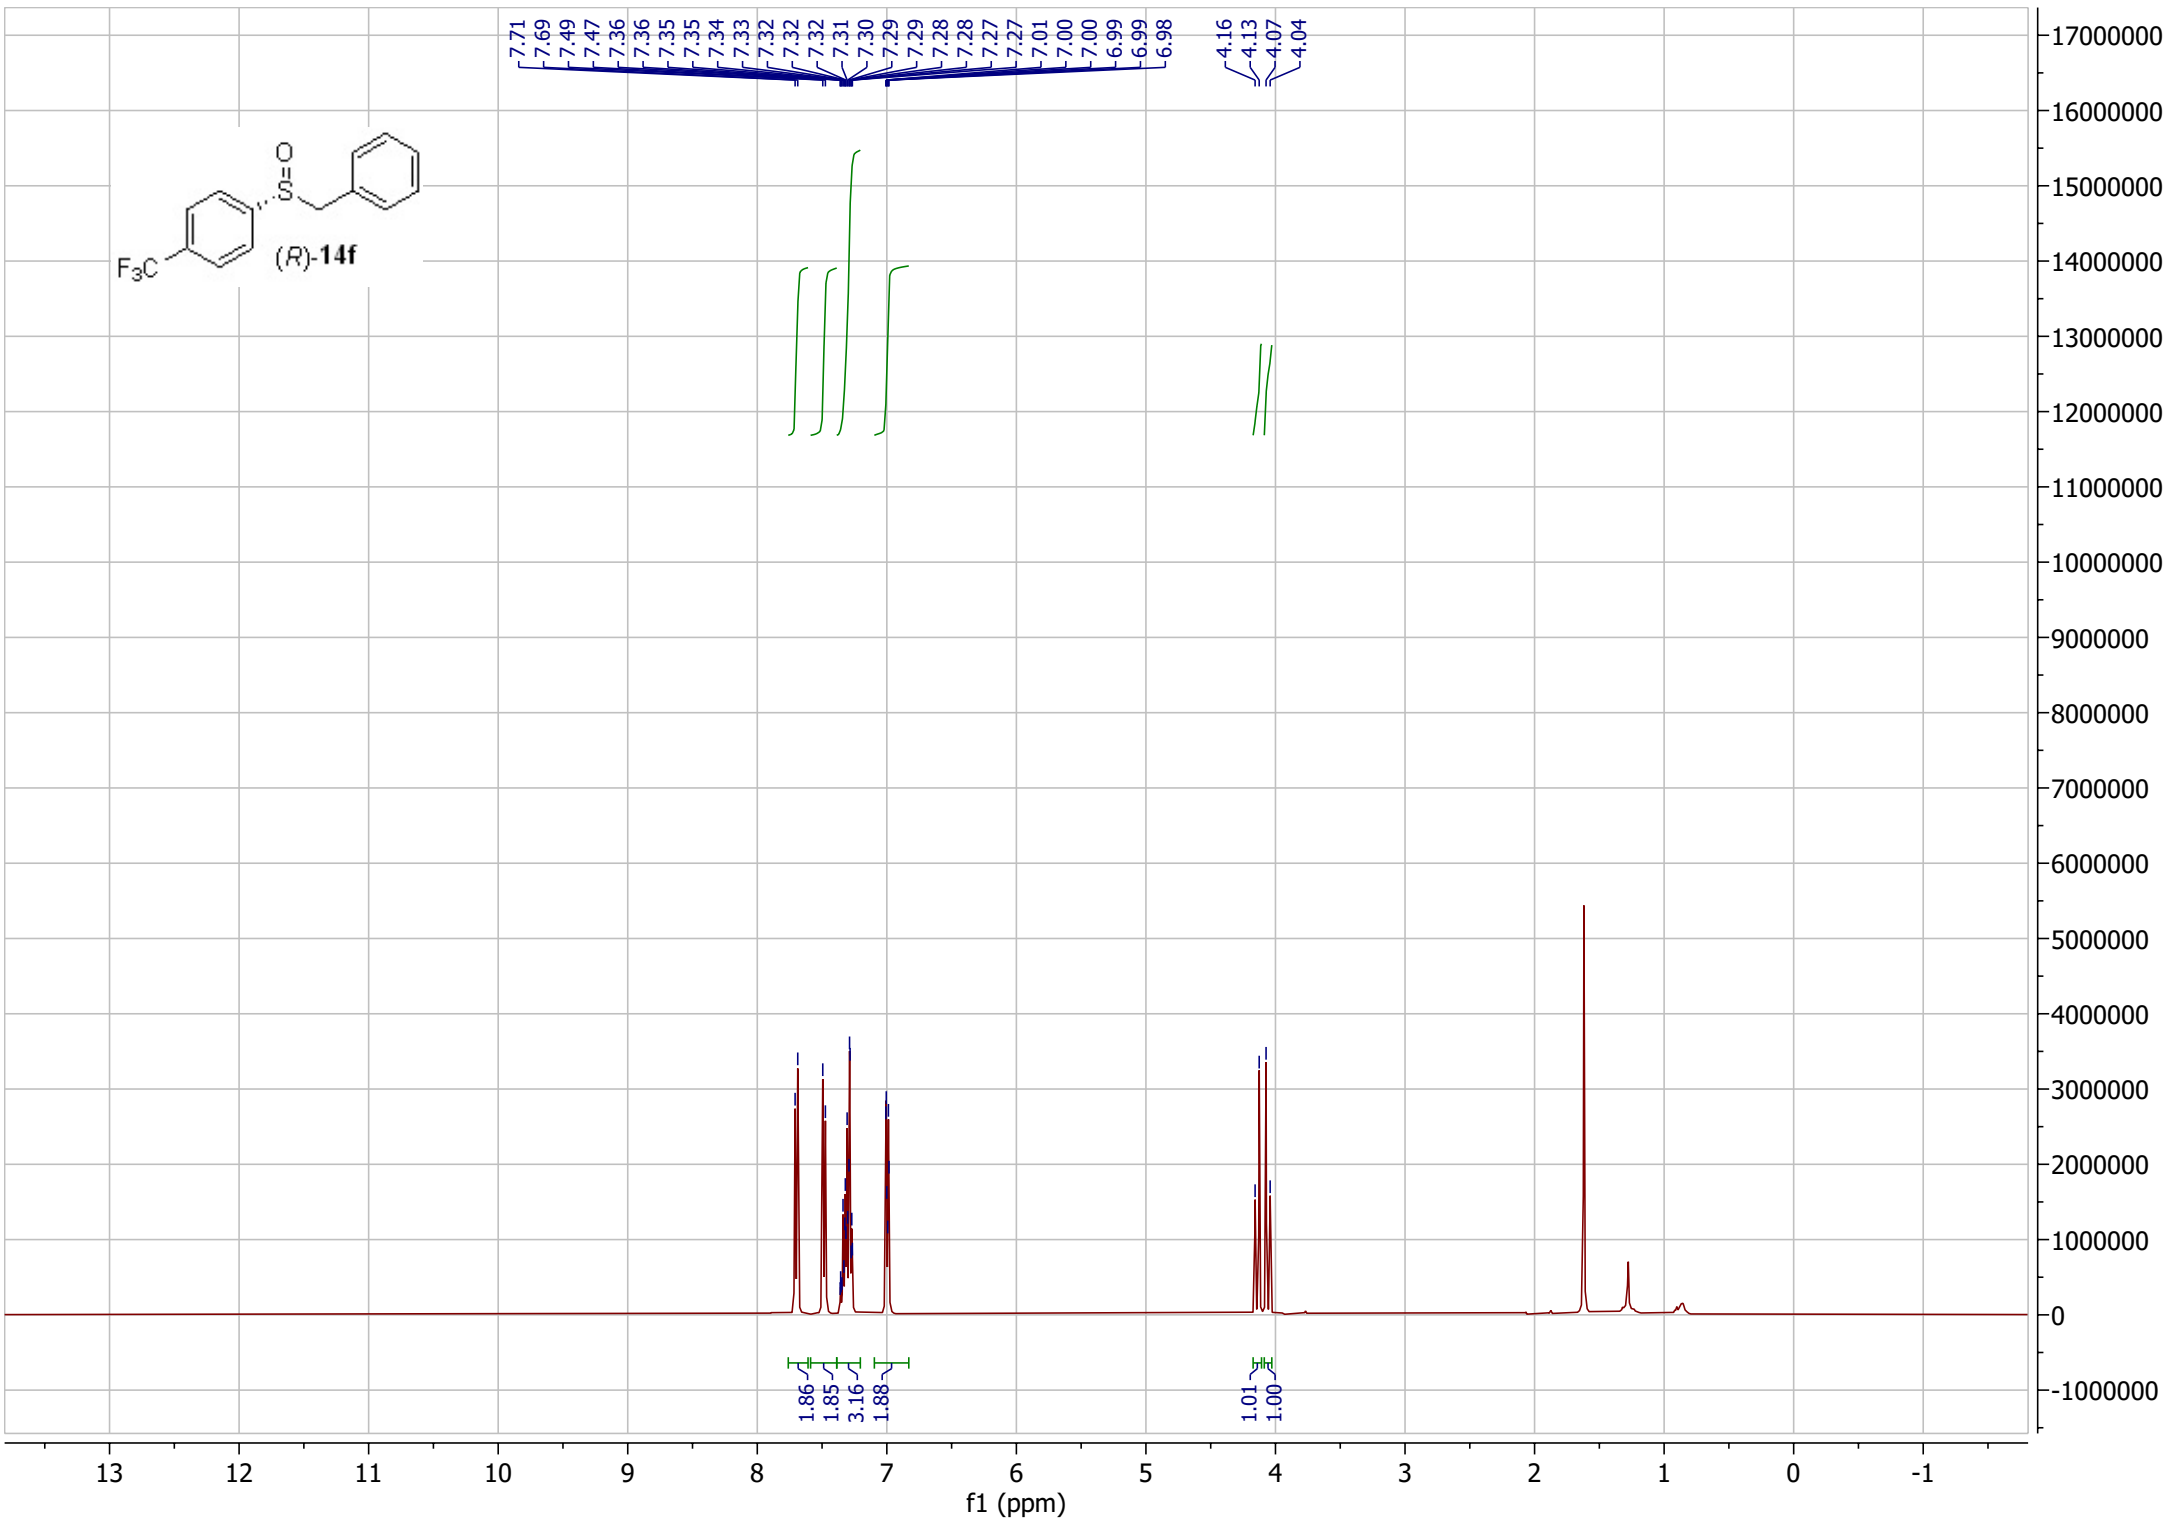

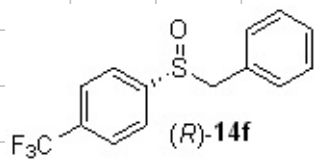

147.26  
133.58  
133.37  
133.15  
132.93  
130.47  
128.75  
128.73  
128.50  
125.96  
125.93  
125.91  
125.88  
125.05  
124.53

63.49

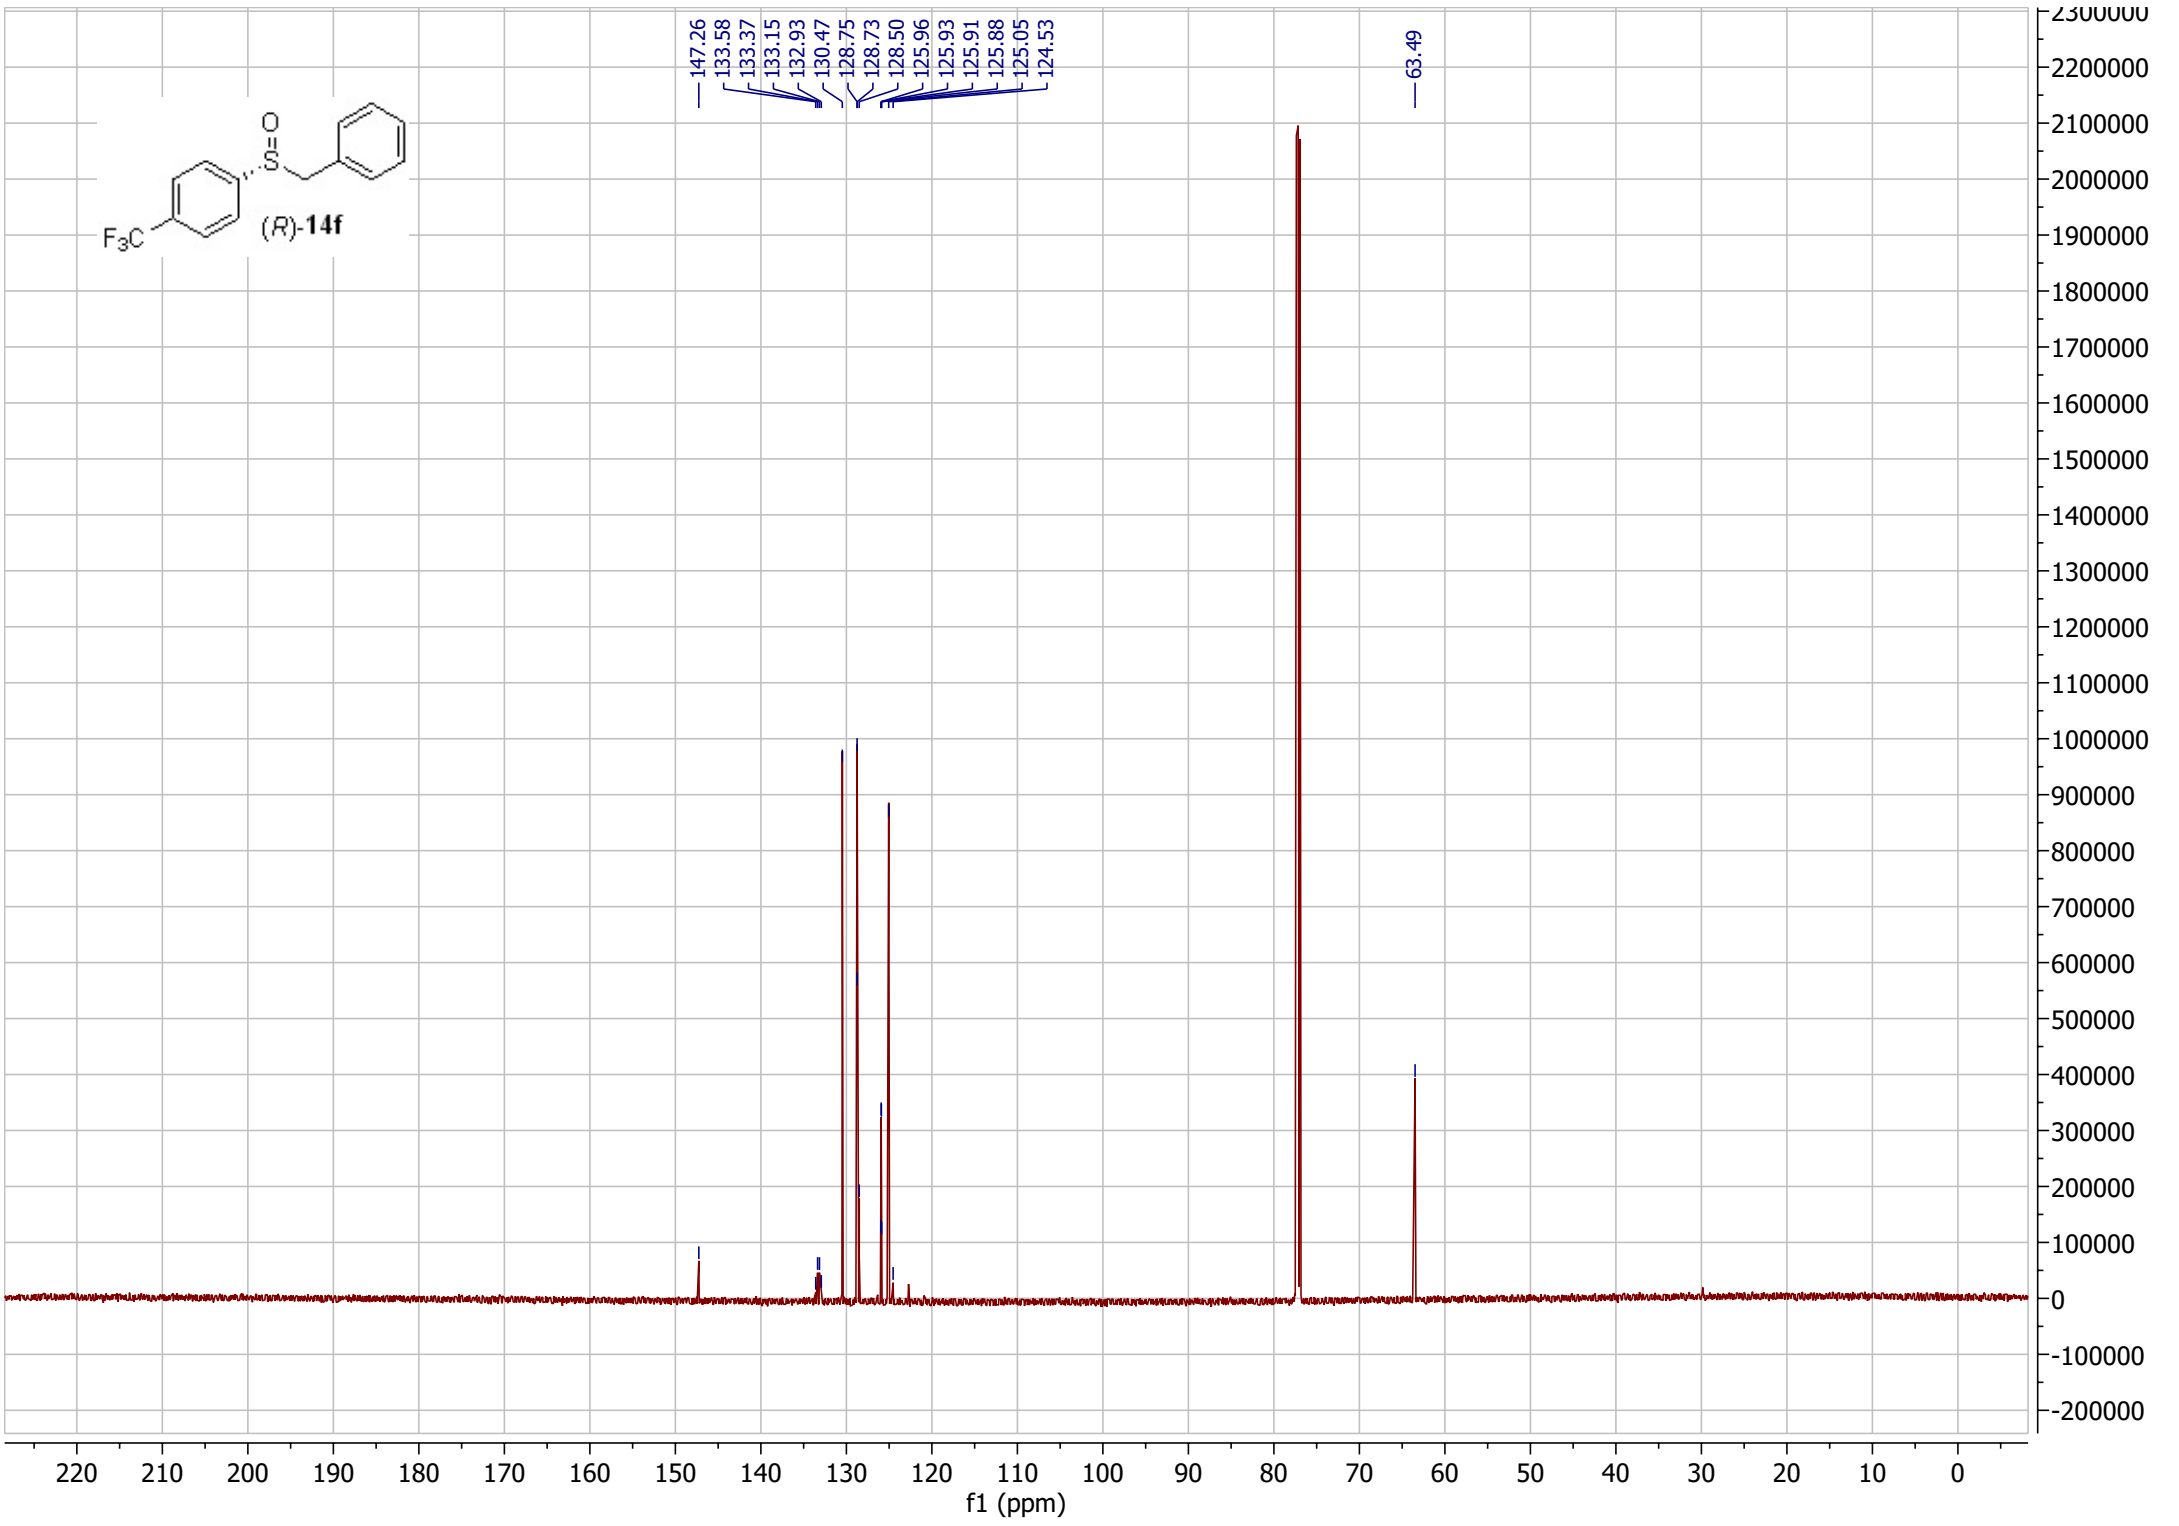

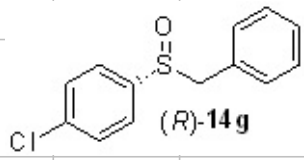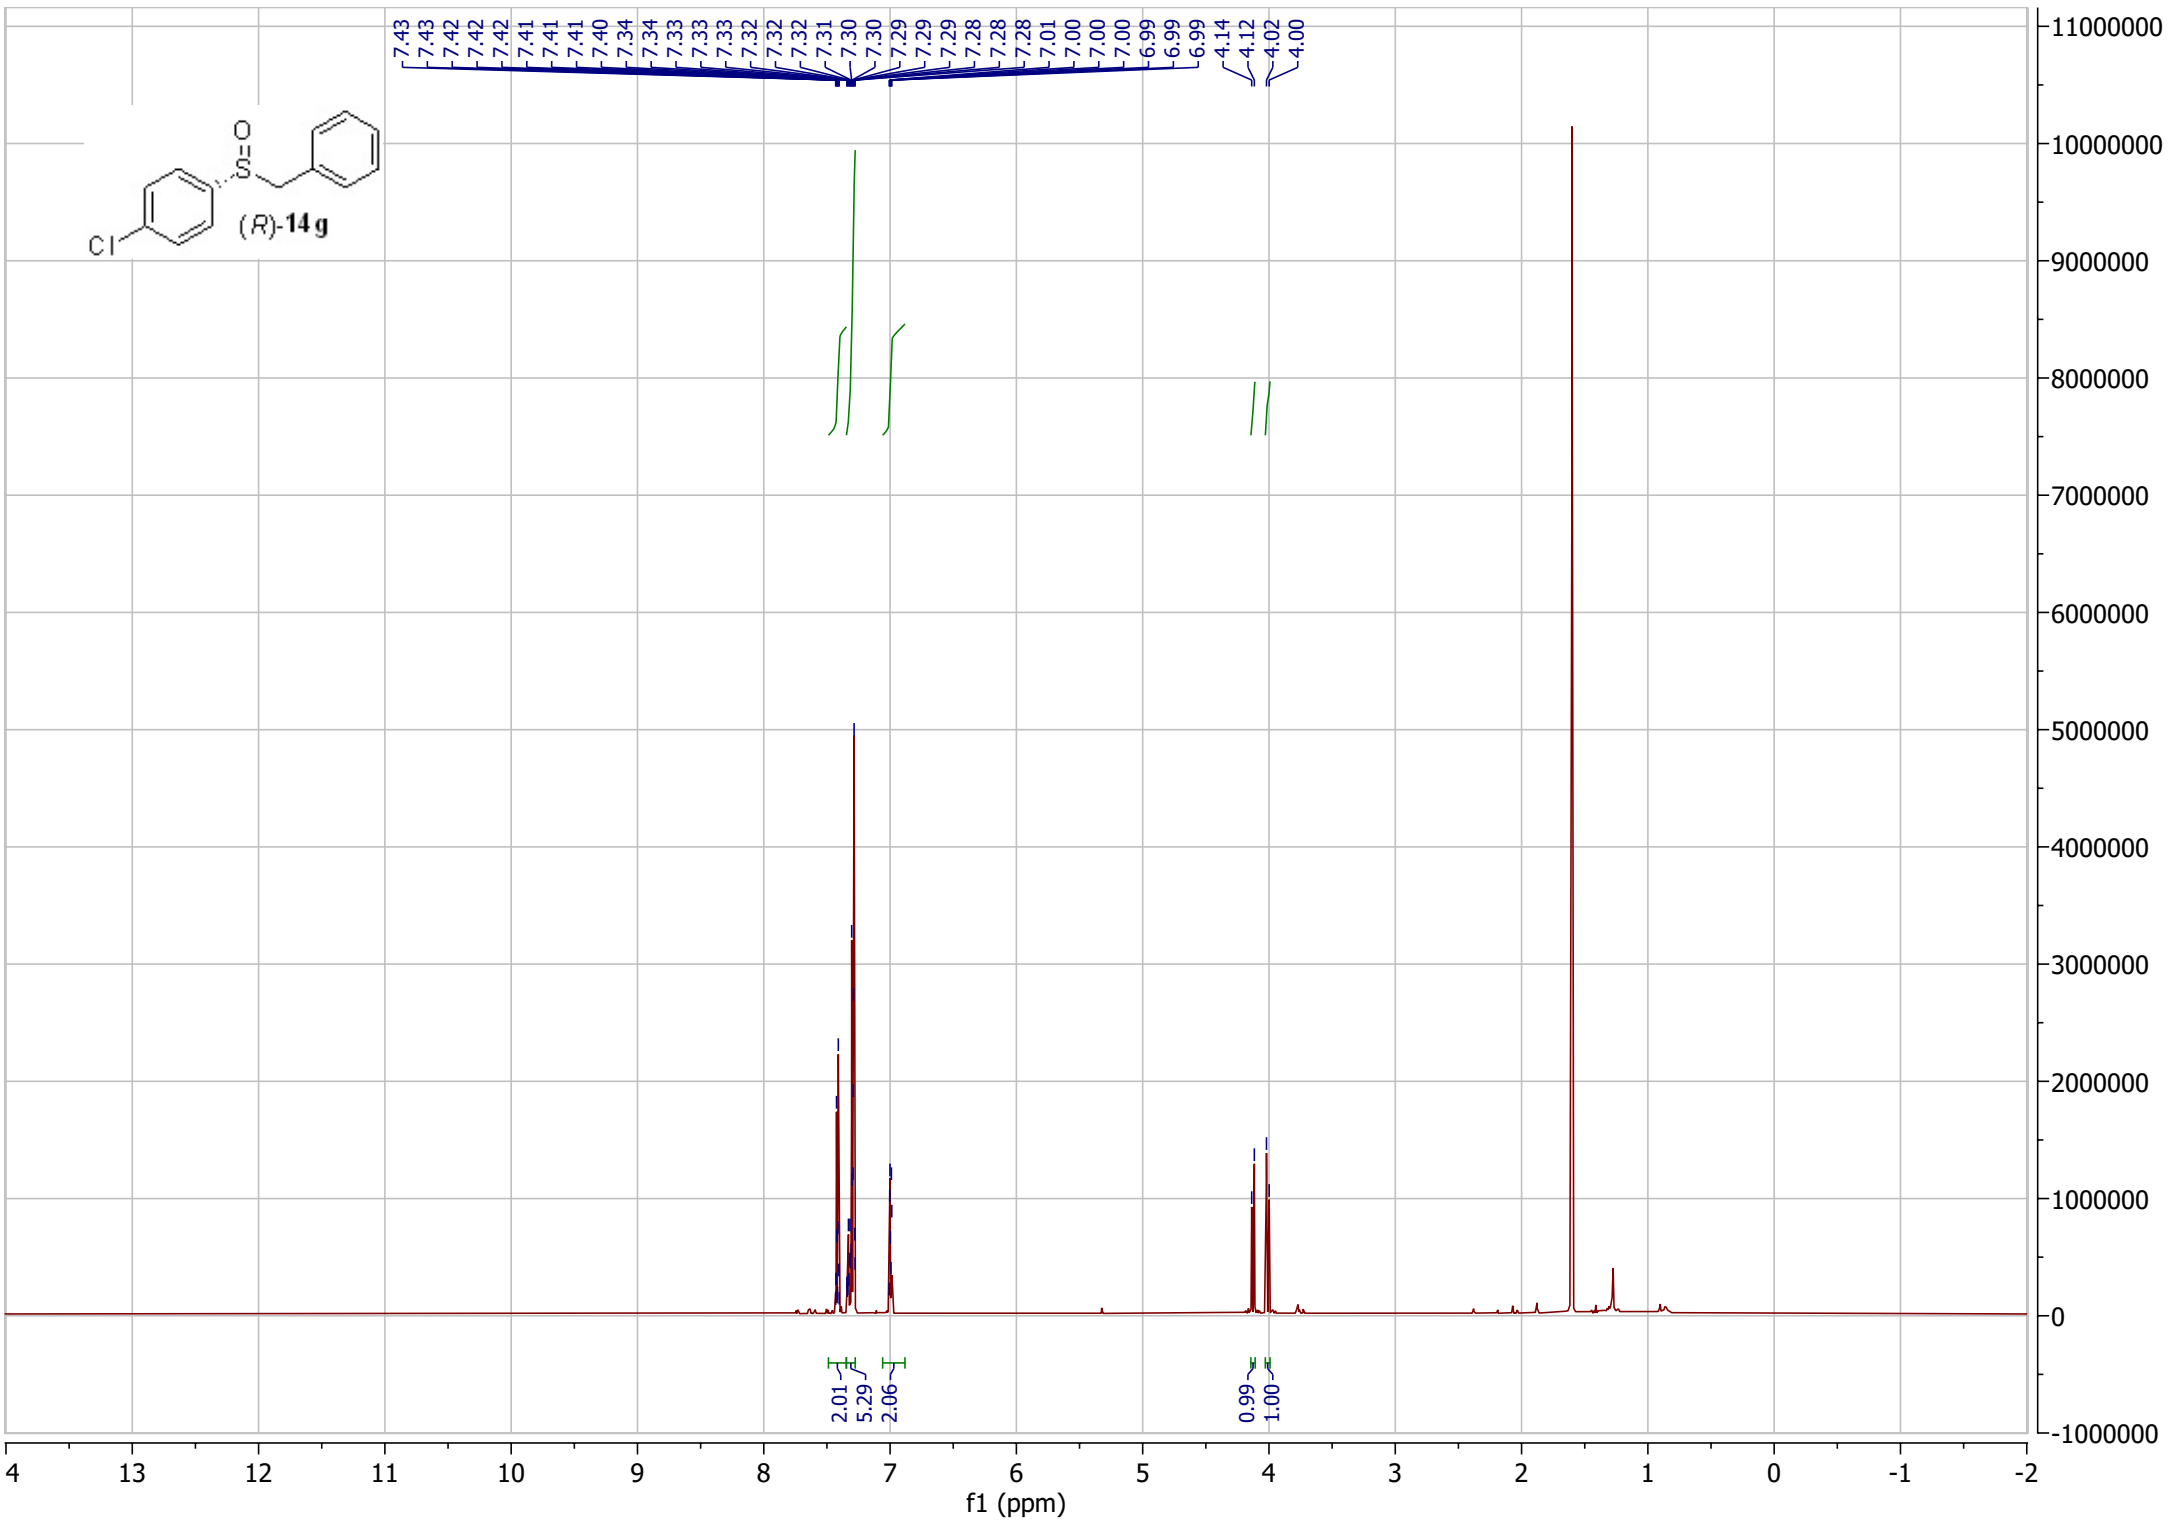

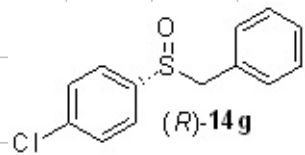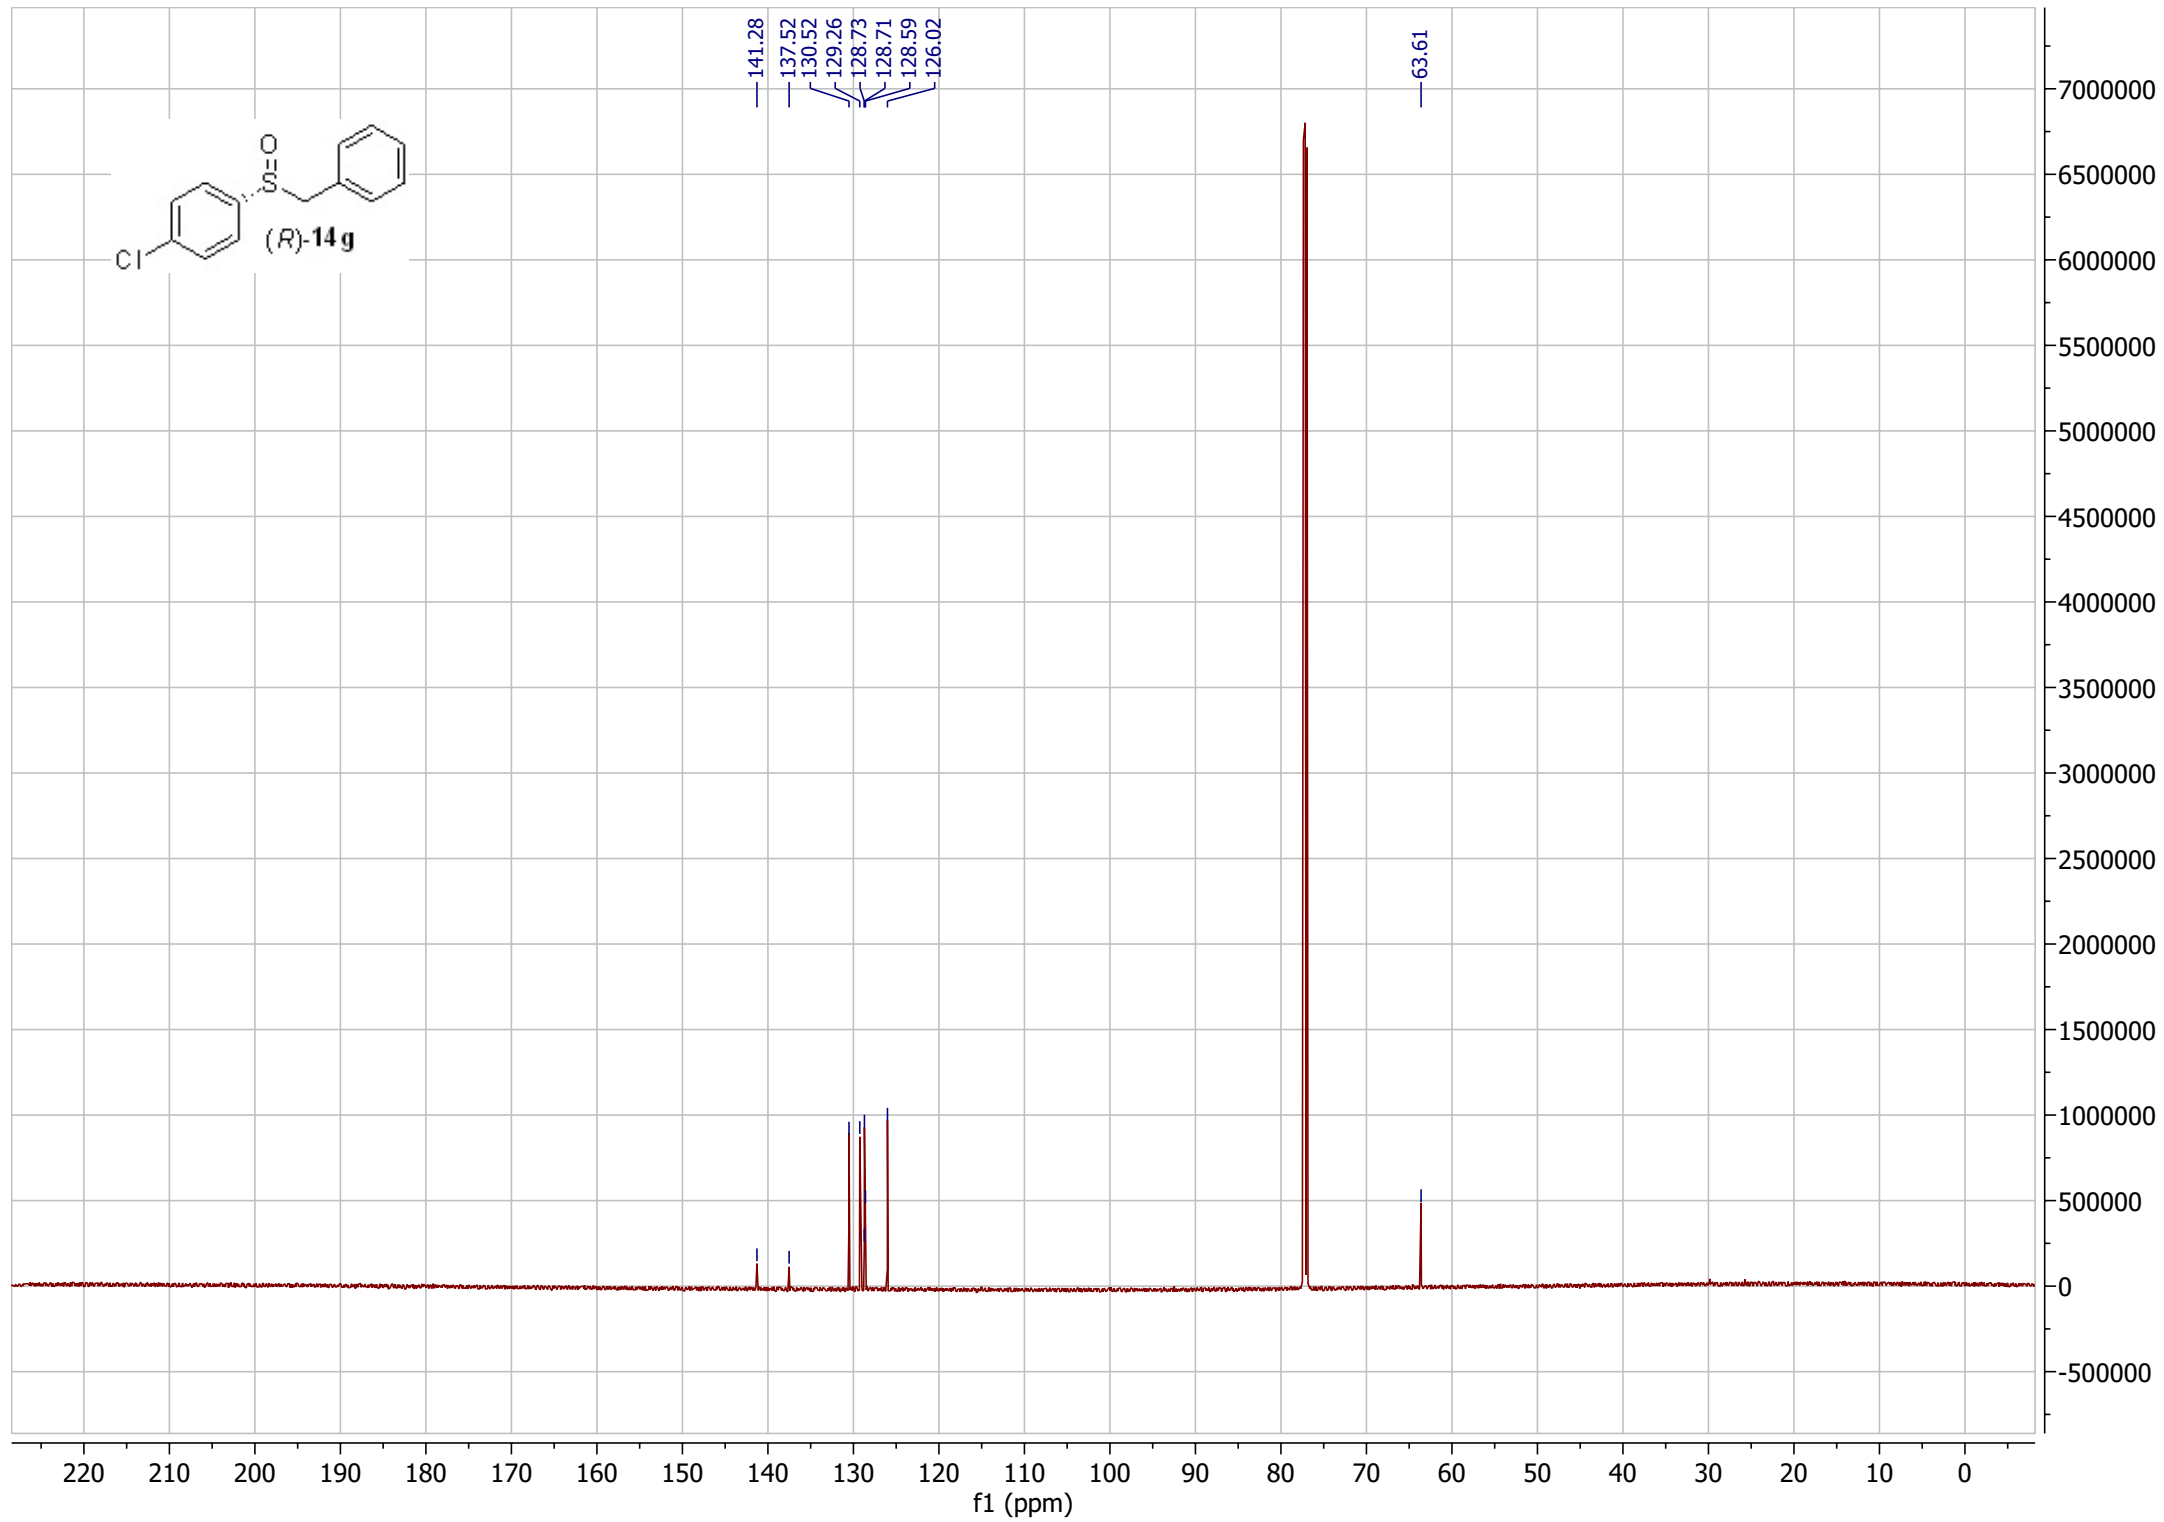

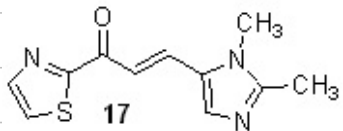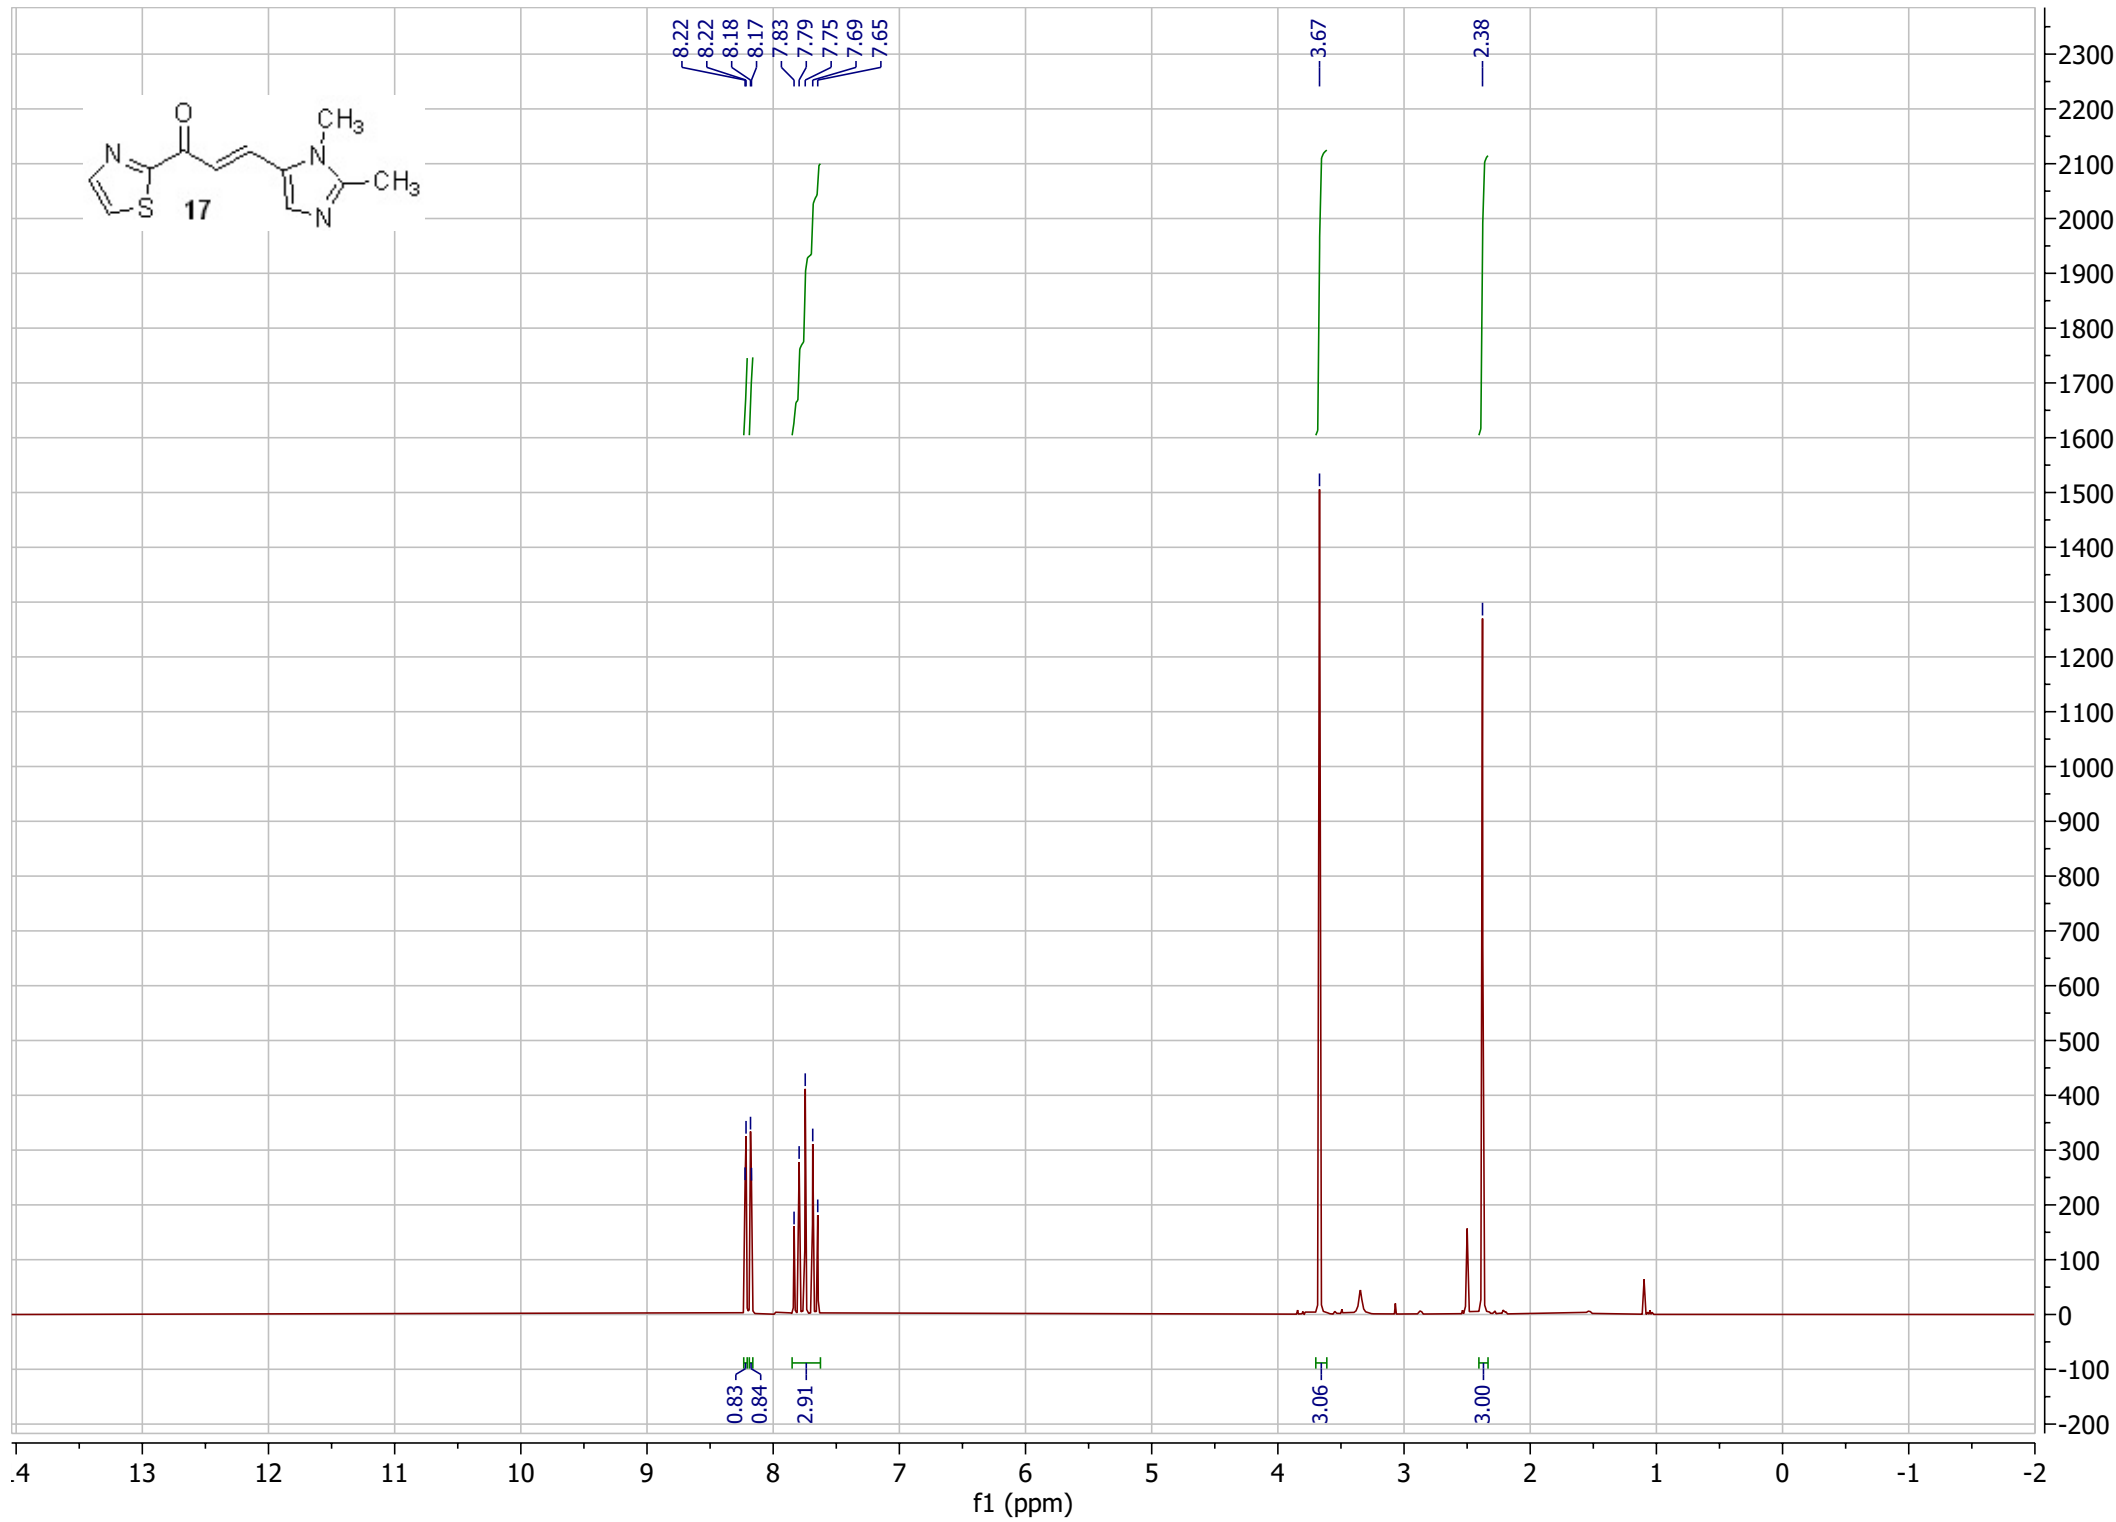

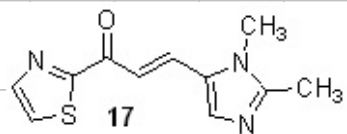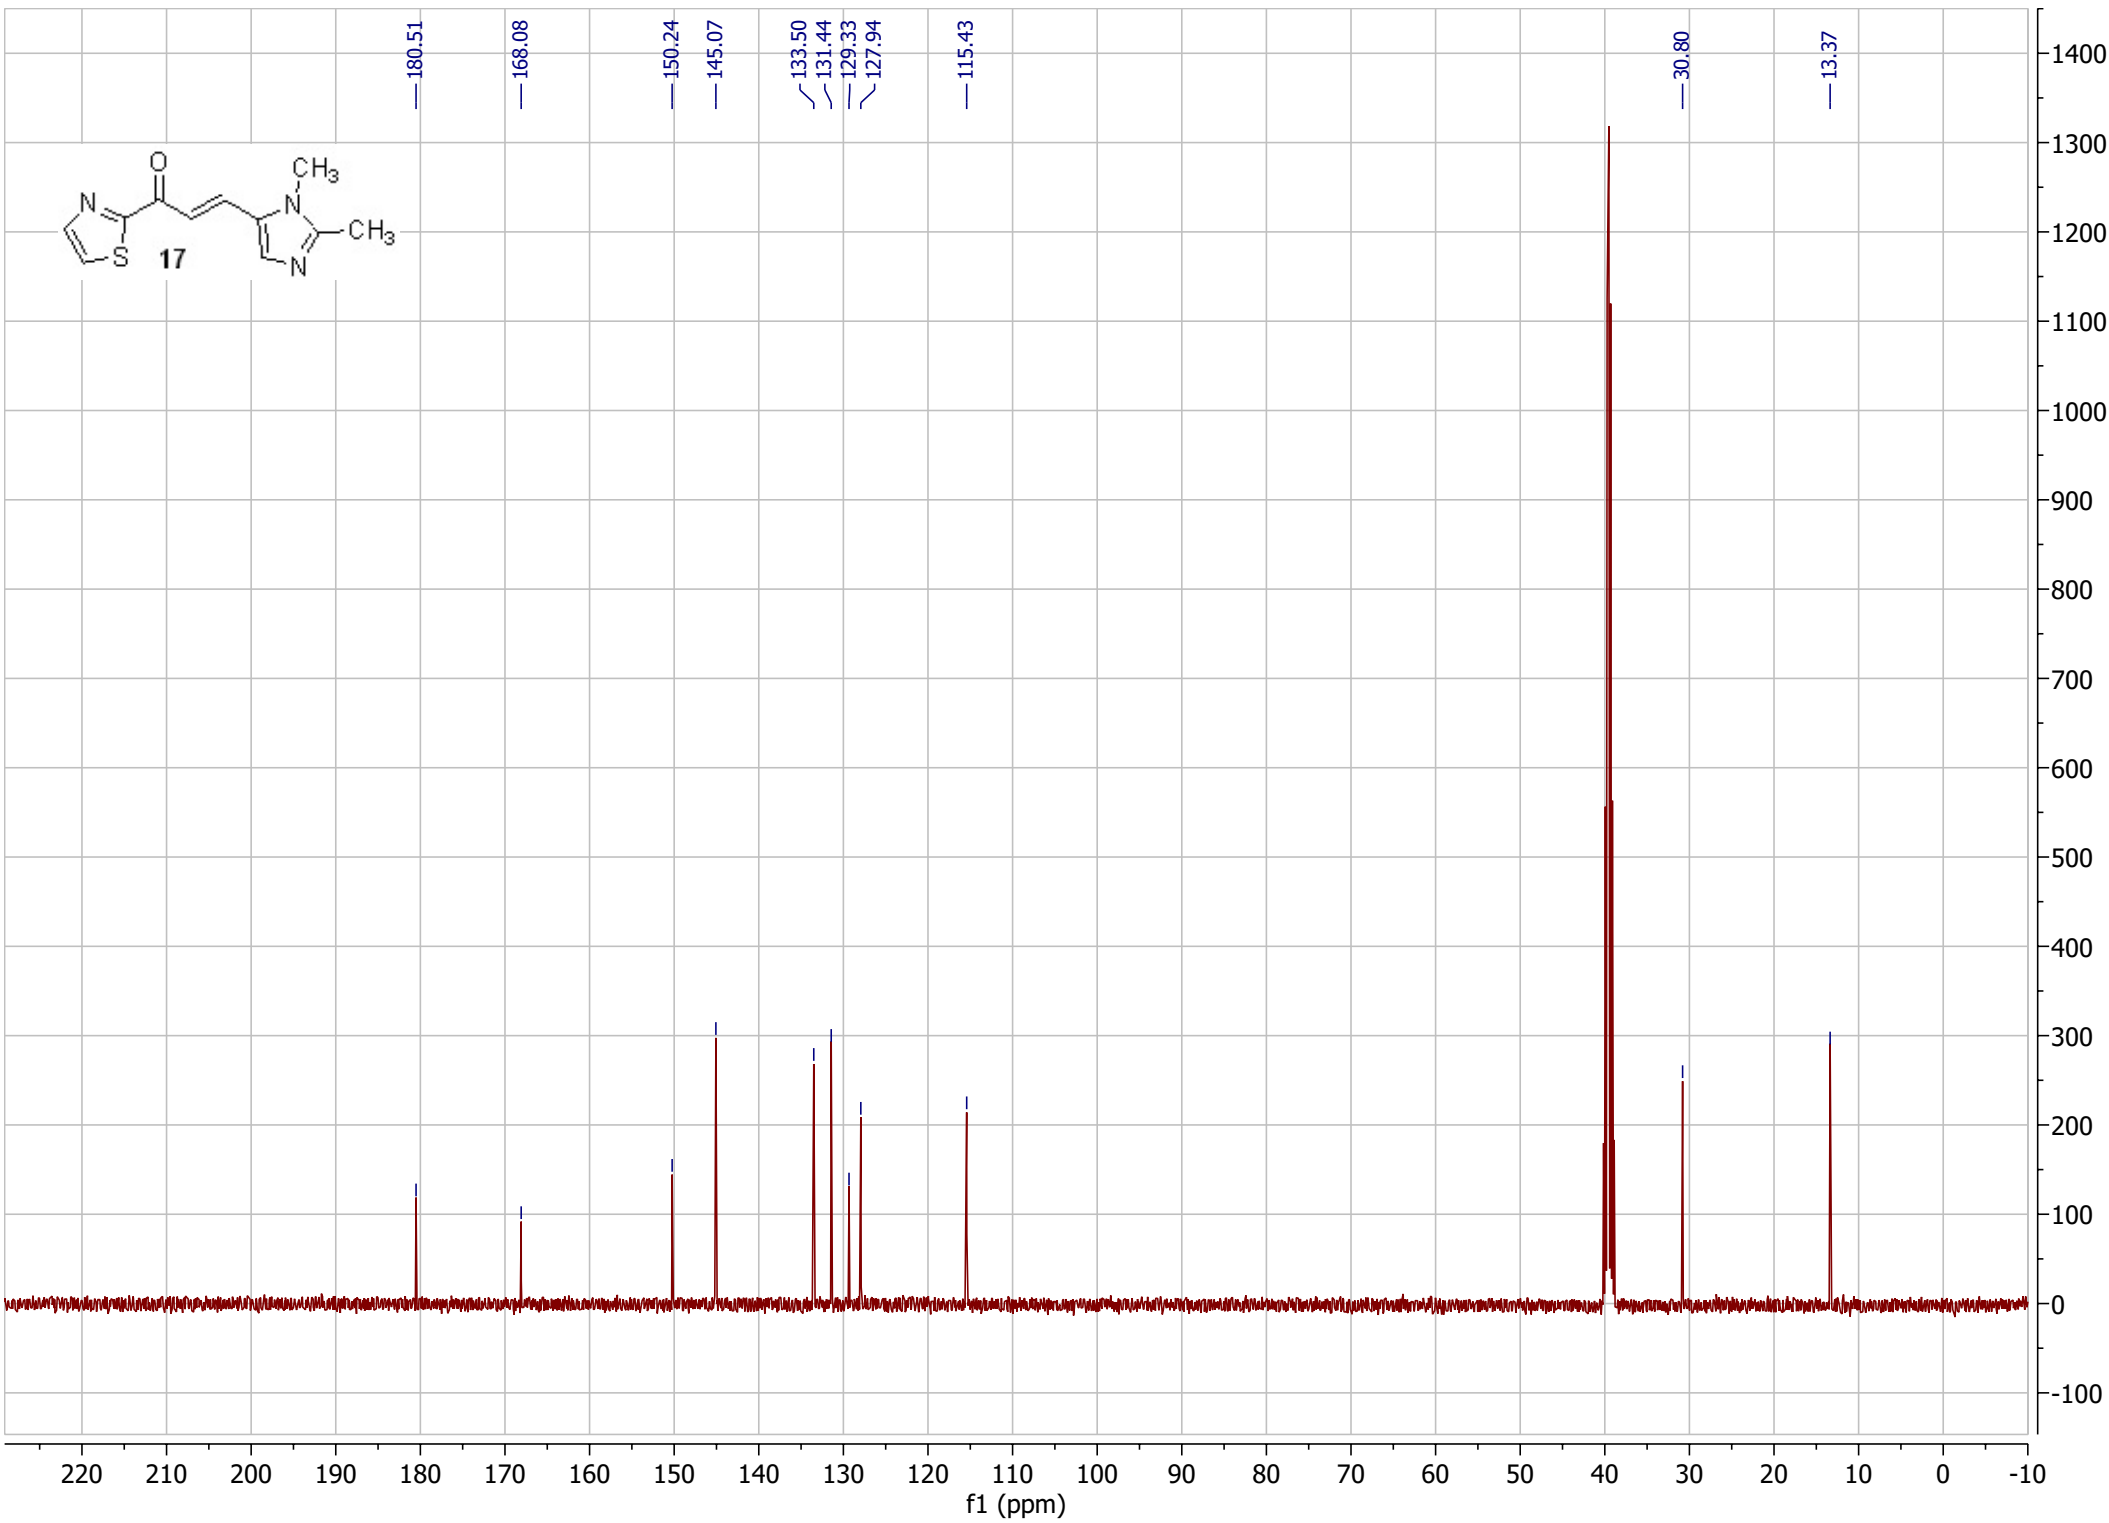

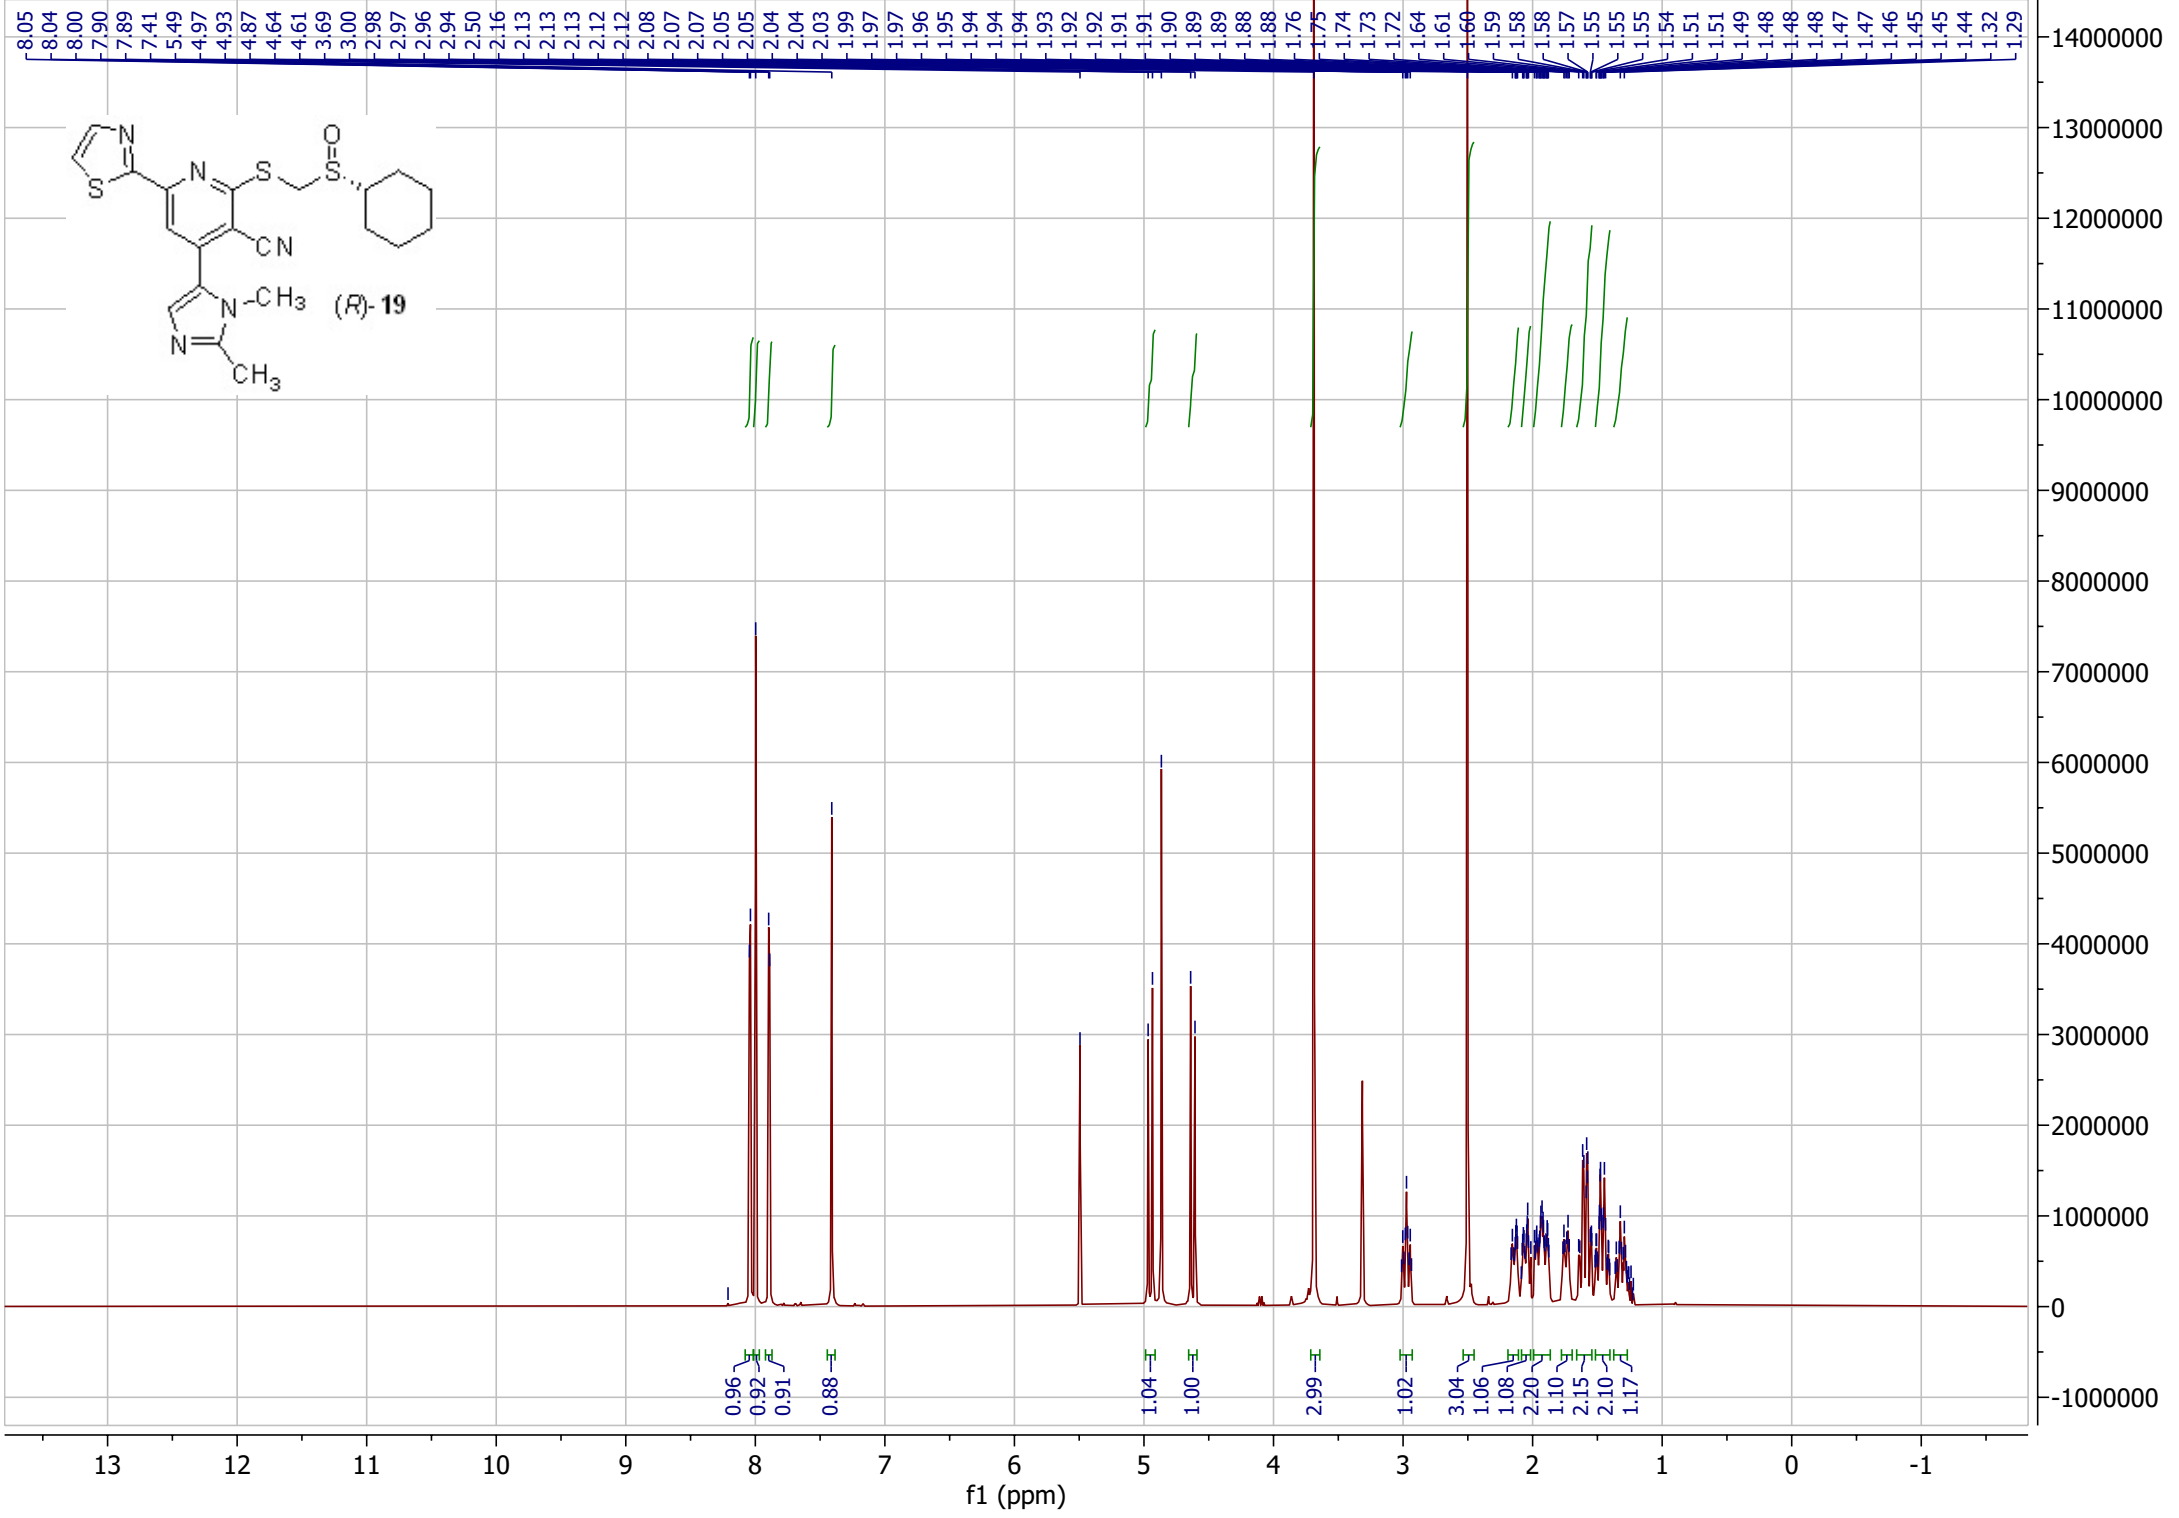

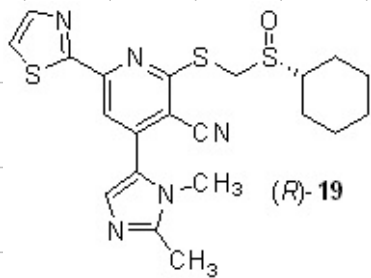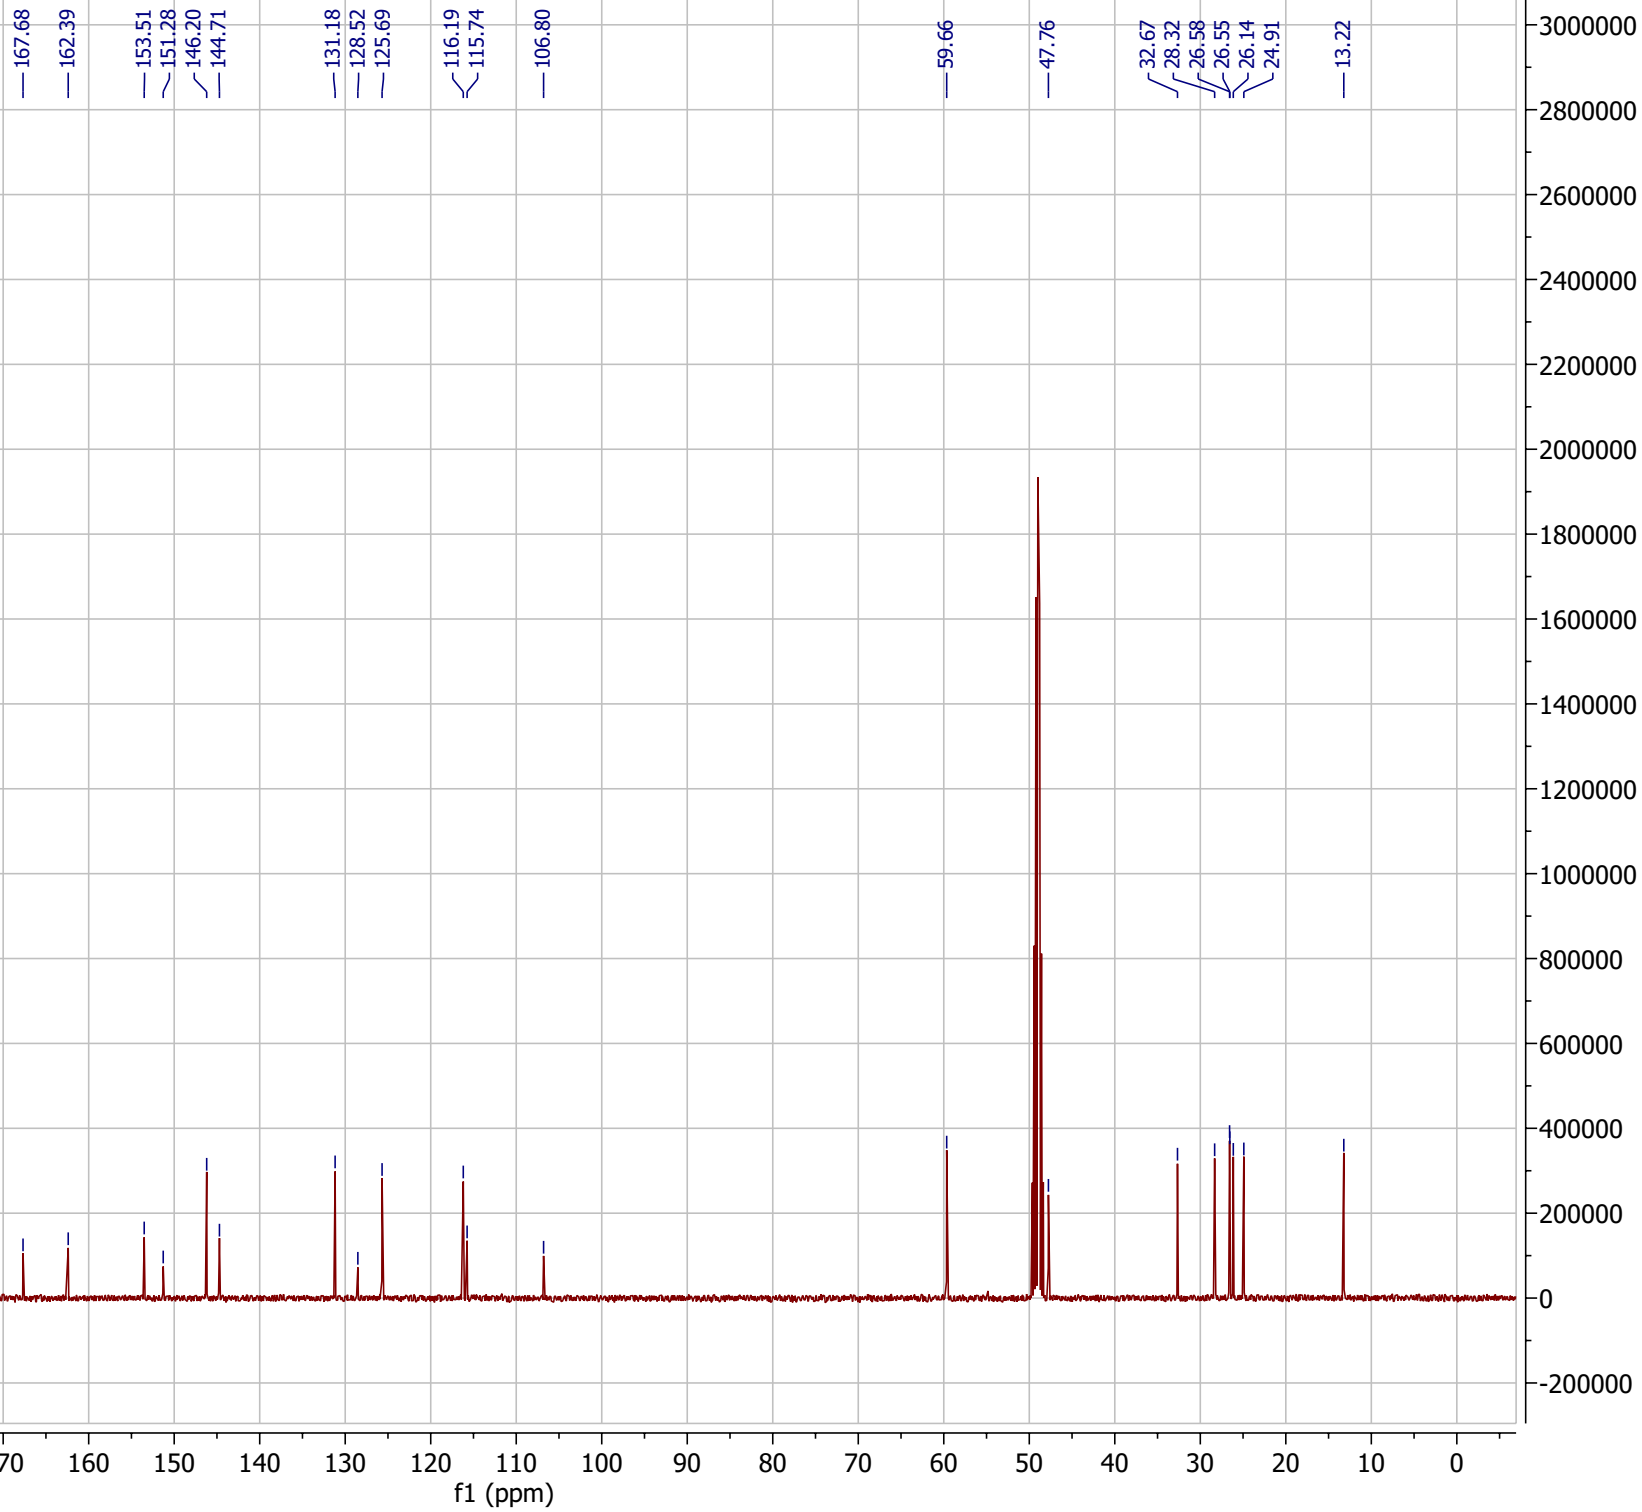



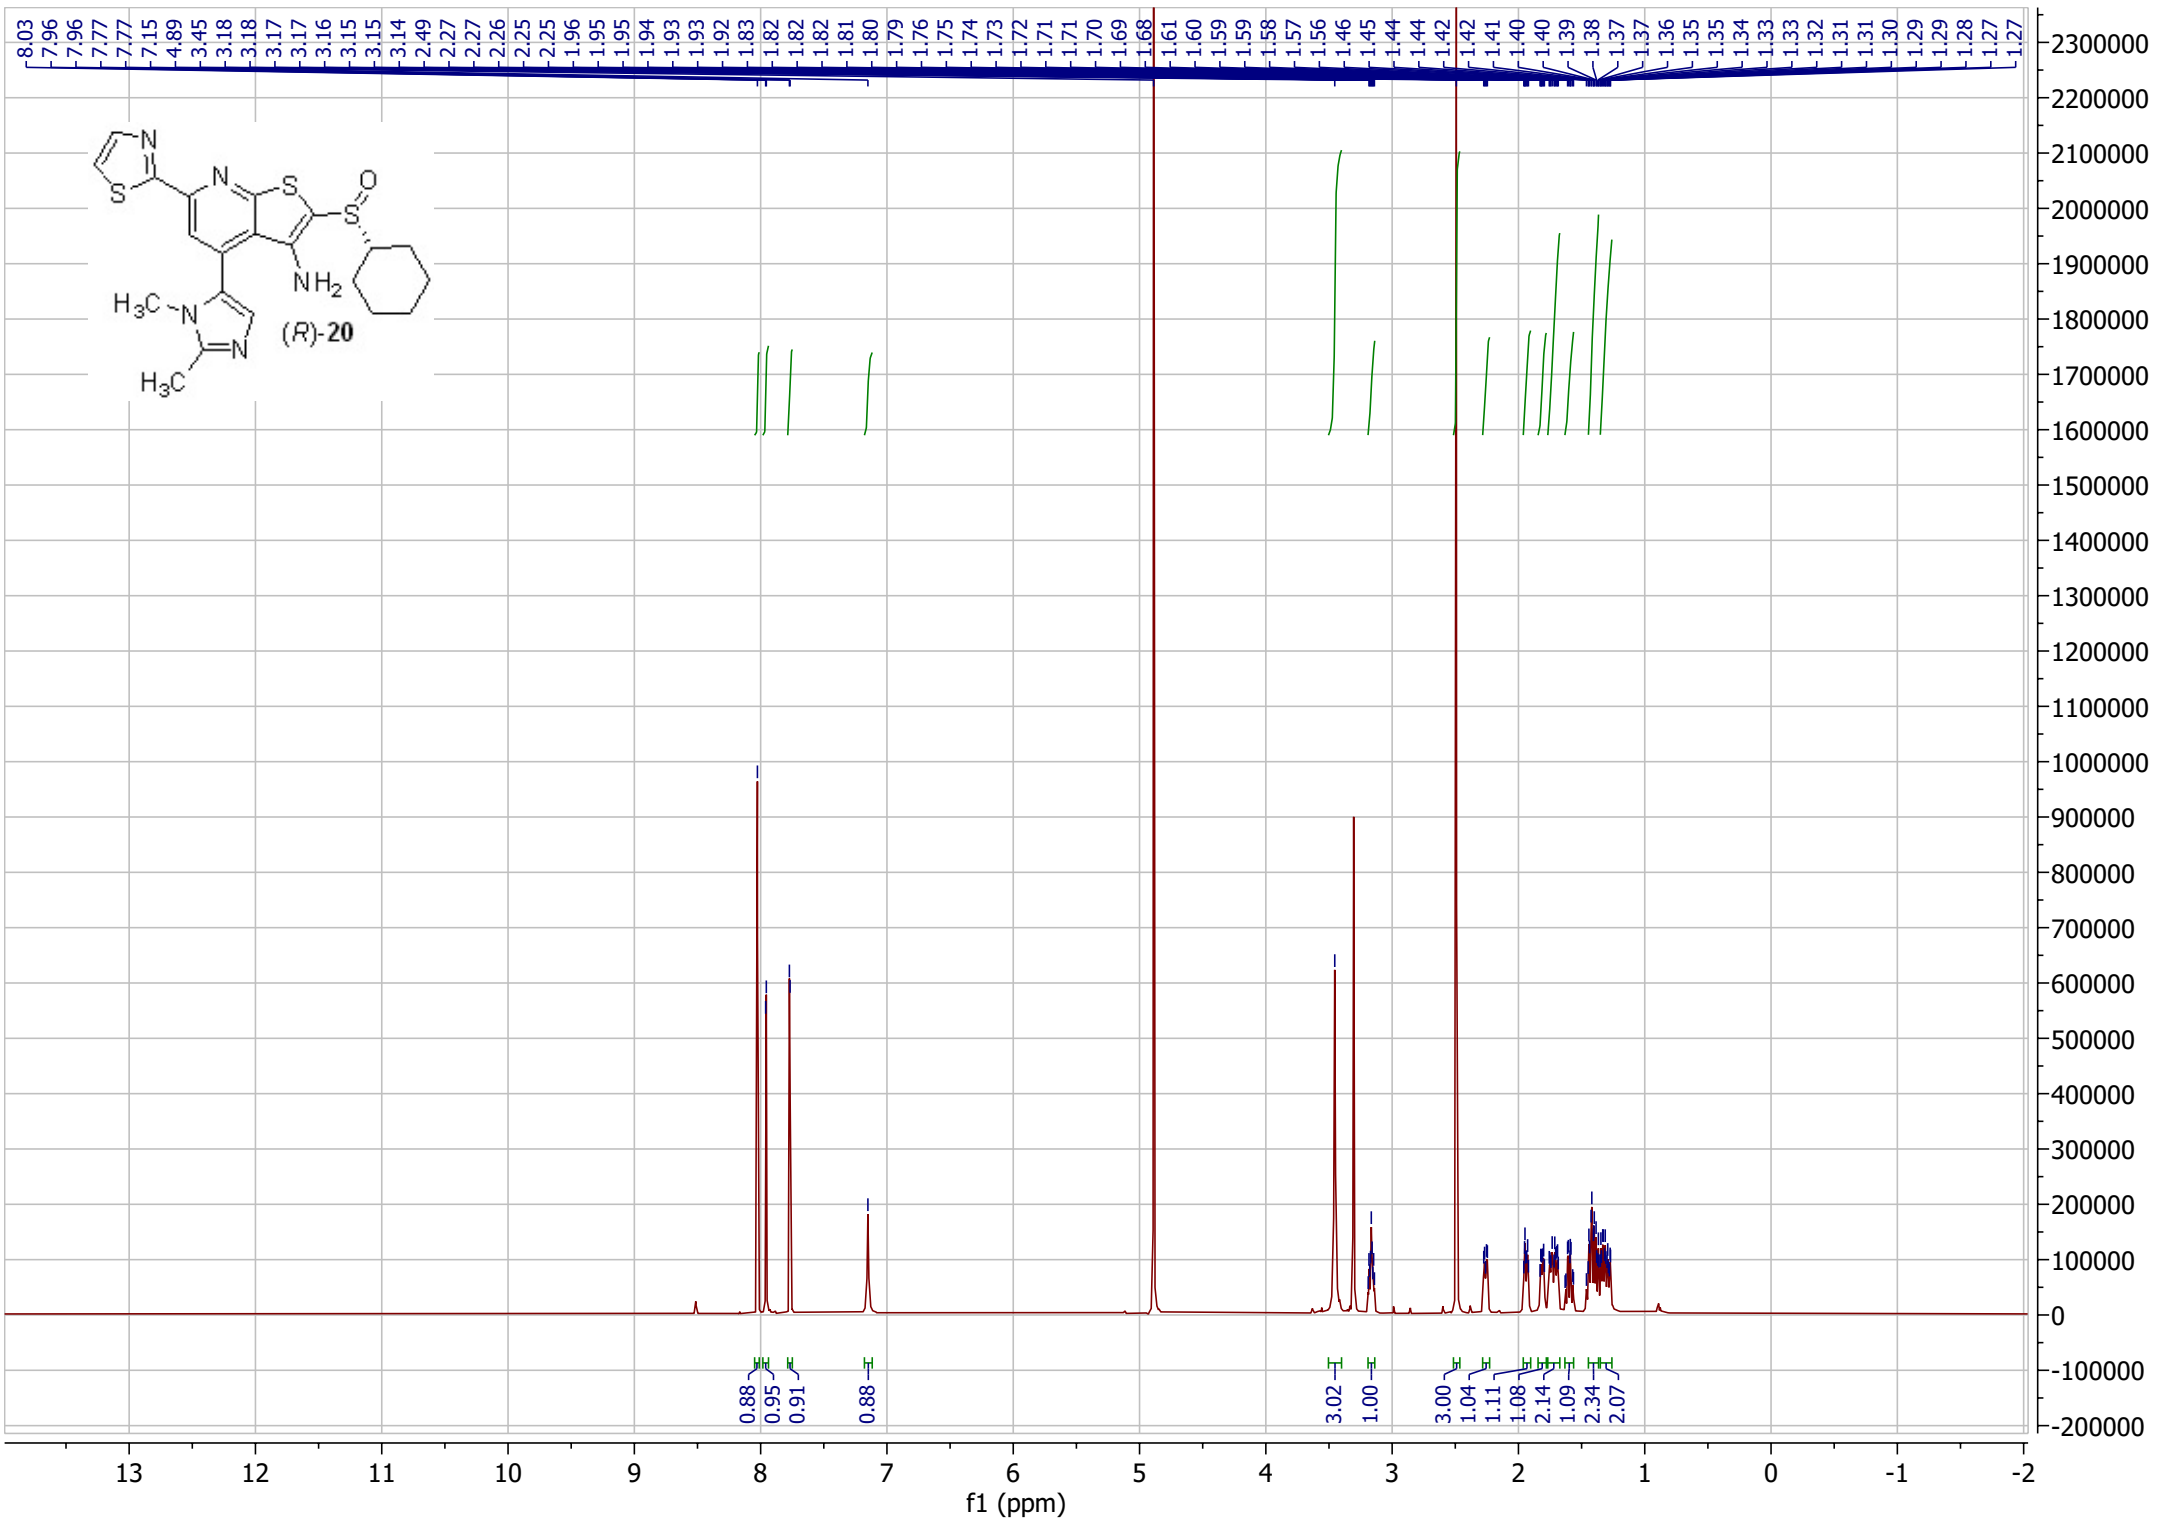

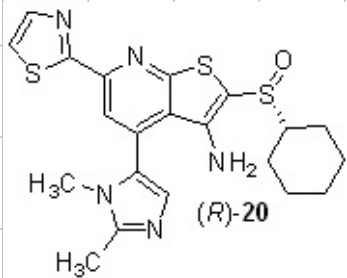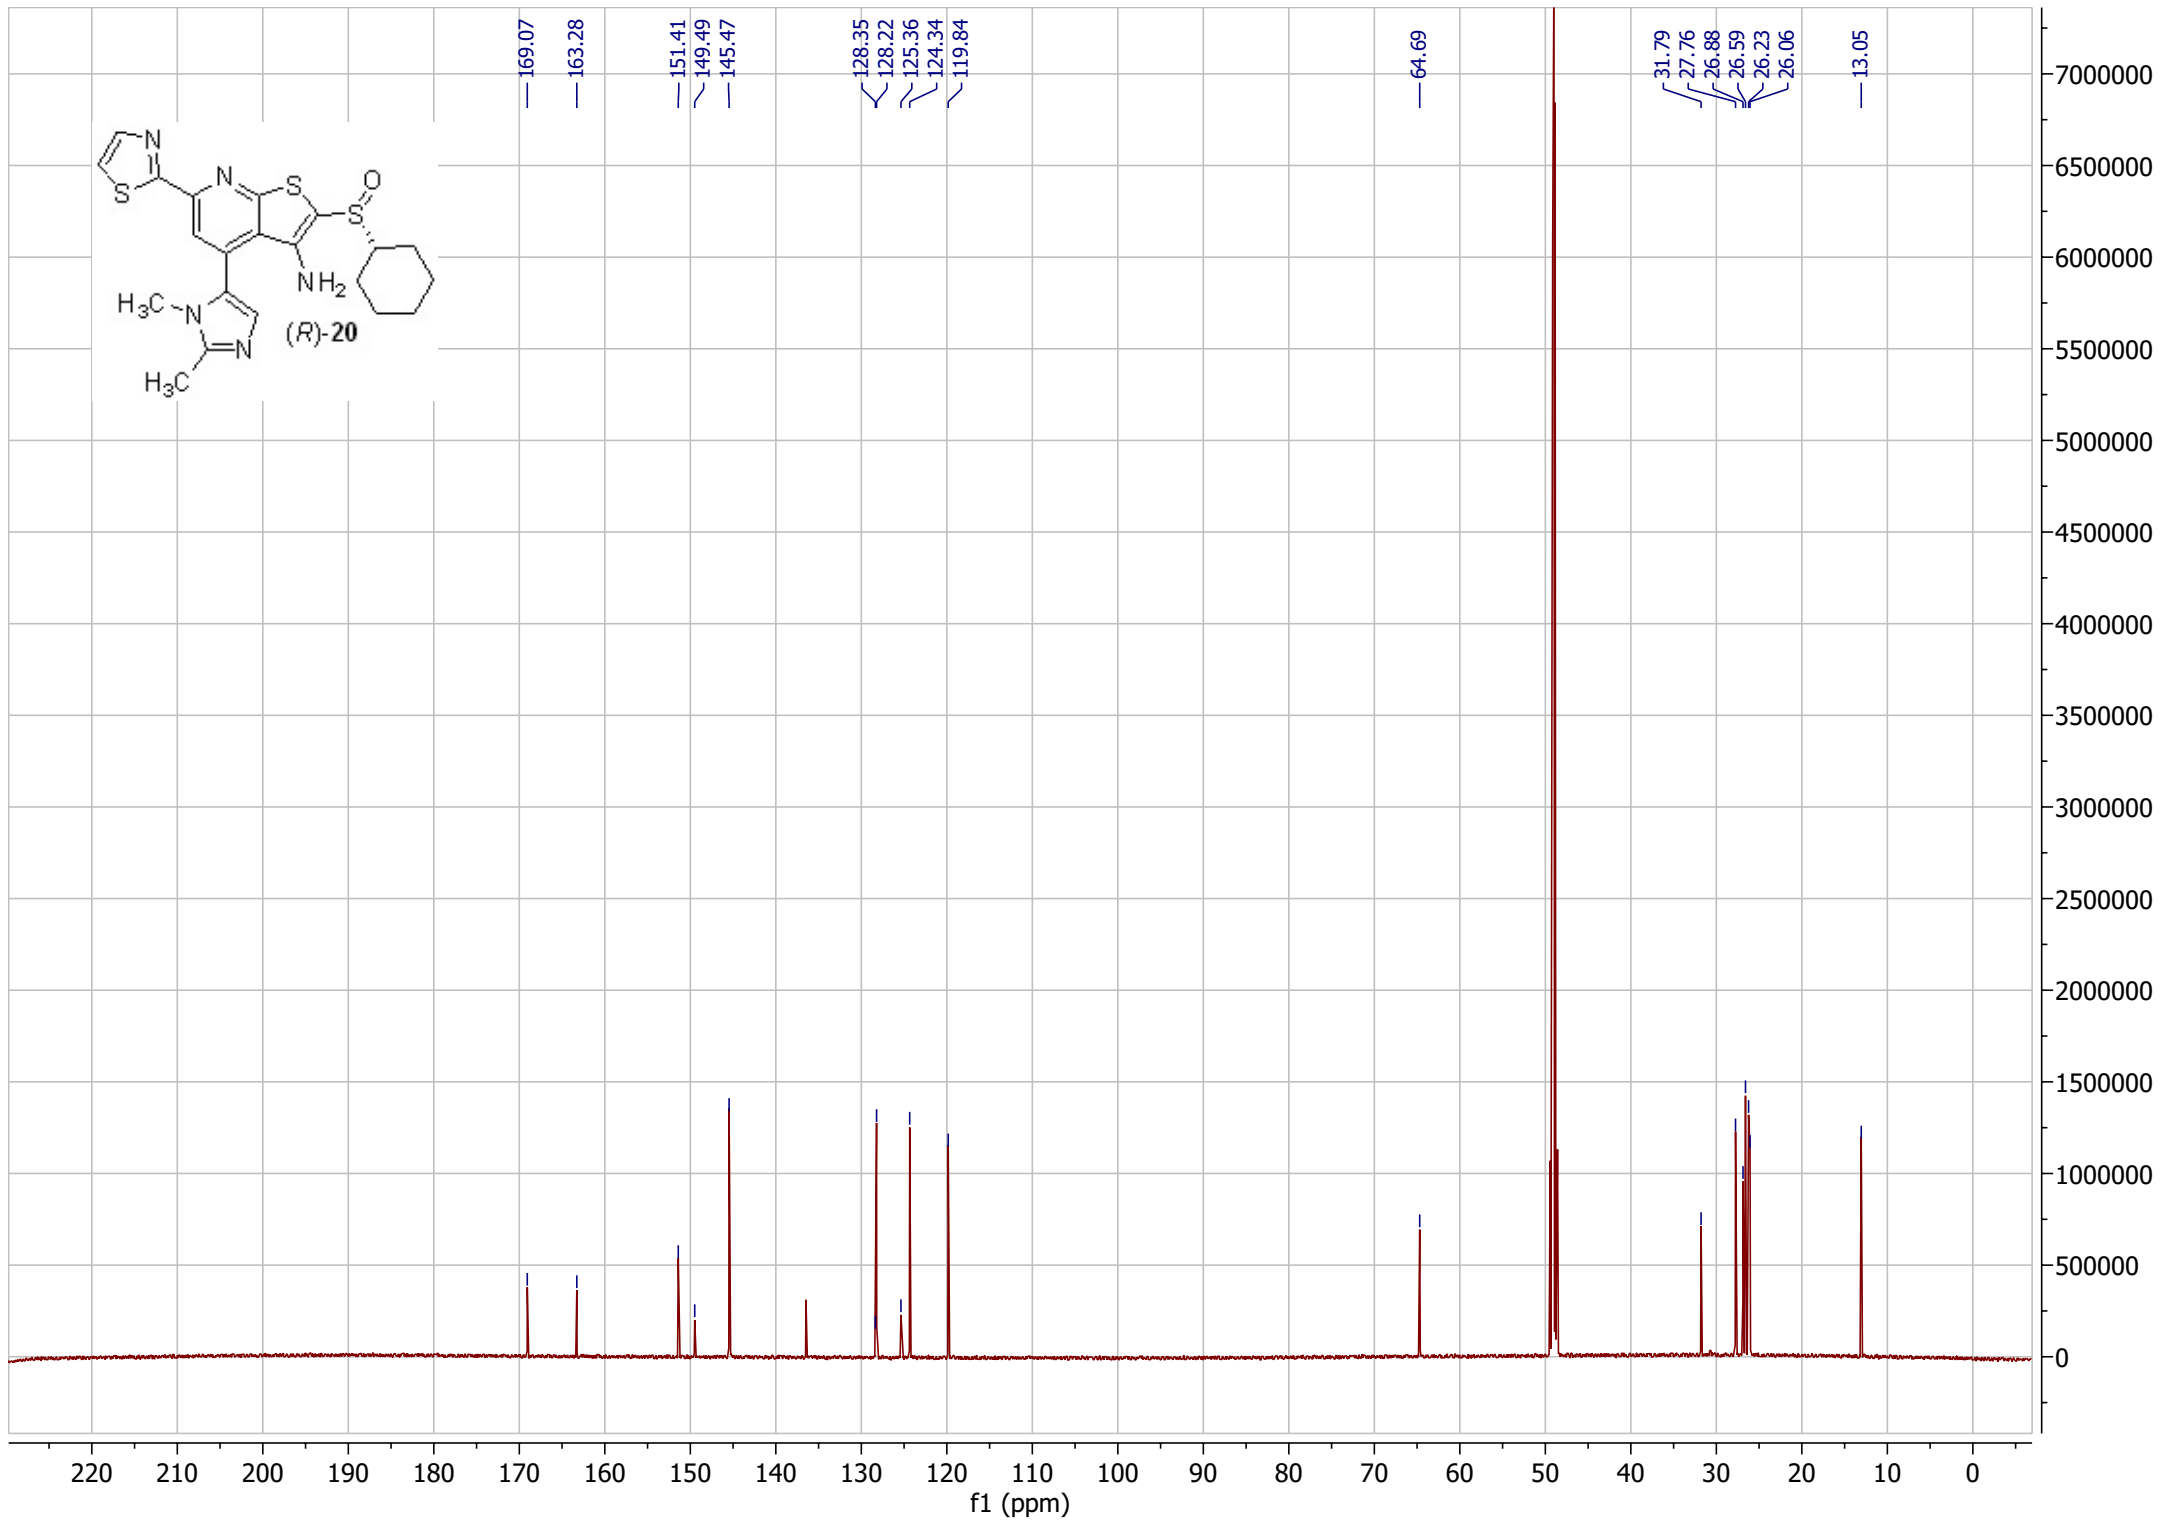

Supplement: NIHMS1957510-supplement-Supporting_information.pdf [file NIHMS1957510-supplement-Supporting_information.pdf]
